# Supplementary material
Source: PubMed Central journal article supplement (PMC9643672)
Supplement: NIHMS1802905-supplement-1.pdf [file NIHMS1802905-supplement-1.pdf]

## 1 **Supplementary Materials and Methods**

### 2 **Human subjects**

3 All human tissues were obtained with approval by the Scripps Human Subjects Committee.  
4 Intact knee joints were procured by tissue banks and processed within 48 hours  
5 postmortem. The donors with no history of joint disease or trauma were included, and all  
6 cartilage and meniscus surfaces were intact upon macroscopic inspection. OA-affected  
7 cartilage was harvested from tissues removed during knee replacement surgery of OA  
8 patients.

### 10 **Mice**

11 All animal studies were performed with approval by the Scripps Institutional Animal Care  
12 and Use Committee. *Klf2<sup>lox/lox</sup>* mice were generated as described previously<sup>1</sup>, and those in  
13 the C57BL/6J background were generously provided by Prof. Eric Sebzda at Wayne State  
14 University. *Aggrecan-Cre<sup>ERT2</sup>* knock-in mice<sup>2</sup> in the C57BL6/J background (JAX stock  
15 #019148) were obtained from the Jackson Laboratory (Bar Harbor, ME). Tamoxifen  
16 (Sigma-Aldrich, St Louis, MO) was injected intraperitoneally at a dose of 0.15 mg/g body  
17 weight to mice for five consecutive days. Genotyping was performed by PCR using tail  
18 DNA. Littermate *Klf2<sup>lox/lox</sup>* mice were used as controls of *Aggrecan-Cre<sup>ERT2</sup>;Klf2<sup>lox/lox</sup>*  
19 mice. All mice used in the experiments were males on the C57BL/6J background strain, and  
20 littermate mice were randomly assigned to the groups. Sample sizes in each experiment  
21 were decided based on previous experience. There were no mice excluded from the  
22 analysis.

23

24 **Processing of human tissues and primary cell culture**

25 For human OA chondrocyte isolation, cartilage was harvested from tissues removed during  
26 knee replacement surgery of OA patients. For isolation of cells from normal human knees,  
27 cartilage, meniscus and synovium were harvested from intact knee joints obtained from  
28 tissue banks. Harvested tissues were digested with 2 mg/ml of type 2 collagenase overnight  
29 at 37°C. Isolated cells were maintained in DMEM with 10% (v/v) calf serum (CS)  
30 supplemented with 1% (v/v) penicillin-streptomycin-glutamine (PSG).

31

32 **Cell culture**

33 TC28a2 cells were purchased from Sigma-Aldrich. TC28a2 cells and human primary cells  
34 were cultured in DMEM with 10% (v/v) CS supplemented with 1% (v/v) PSG. BMSCs  
35 were purchased from Lonza (Walkersville, MD), and were cultured in MSCGM human  
36 Mesenchymal Stem Cell Growth BulletKit Medium (Lonza). In pellet culture of BMSCs,  
37 hMSC Chondrogenic Differentiation BulletKit™ Medium (Lonza) was used.

38 Human IL-1 $\beta$  (PeproTech, Rocky Hill, NJ) and TGF- $\beta$ 3 (PeproTech) were used to  
39 treat cells. To inhibit or activate the targeted signaling molecules, 15  $\mu$ M of GGTI-298  
40 (Cayman, Ann Arbor, MI), 20  $\mu$ M of H89 (Abcam, Cambridge, UK), 20  $\mu$ M of U0126  
41 (Abcam), 4  $\mu$ M of 666-15 (R&D Systems, Minneapolis, MN), and 30  $\mu$ M of forskolin  
42 (Cayman) were used. Stocks of the compounds were diluted in dimethyl sulfoxide.

43

44

45 **Adenovirus treatment of cells**

46 Adeno5-CMV-EGFP (Ad-EGFP) and Adeno5-CMV-KLF4 (Ad-KLF4) were produced and  
47 titrated by the Functional Genomics and Viral Vectors Shared Resources at Sanford  
48 Burnham Prebys Medical Discovery Institute (SBP Functional Genomics core; La Jolla,  
49 CA). Adeno5-CMV-KLF2 (Ad-KLF2; #ADV-213187; Vector Biolabs, Philadelphia, PA)  
50 was reamplified and titrated by the SBP Functional Genomics core. TC28a2 cells and  
51 human primary cells were treated with 200 multiplicities of infection (MOIs) of adenovirus.  
52 BMSCs were treated with 100 MOIs of adenovirus.

53

54 **Transfection of expression vectors into cells**

55 The following expression plasmids were used: empty vector (#PCMV6XL5; OriGene,  
56 Rockville, MD), KLF2 (#SC127849; OriGene), KLF4 (#SC123501; OriGene), KLF5  
57 (#SC319166; OriGene), KLF9 (#RC210147; OriGene), KLF10 (#RC2105650; OriGene),  
58 KLF11 (#SC117874; OriGene), KLF15 (#SC122796; OriGene) and HA-KLF4 (#34593;  
59 Addgene, Watertown, MA). TC28a2 cells were transfected with the plasmids using  
60 Lipofectamine 3000 transfection reagent (Thermo Fisher Scientific, Waltham, MA), per  
61 manufacturer's protocol.

62

63 **siRNA knockdown of *KLF2* and *KLF4***

64 siRNAs for KLF2 (#s20271; Thermo Fisher Scientific), KLF4 (#s17795; Thermo Fisher  
65 Scientific) and the negative control (#4390843; Thermo Fisher Scientific) were used for  
66 knockdown experiments. Human normal chondrocytes were transfected with siRNA using

67 Lipofectamine RNAiMAX transfection reagent (Thermo Fisher Scientific), following  
68 manufacturer's protocol.

69

### 70 **RNA isolation and reverse transcription quantitative PCR (RT-qPCR)**

71 Mouse knee cartilage tissues for mRNA analysis were collected microscopically, as  
72 previously described.<sup>3</sup> Total RNA was isolated with Direct-zol RNA MicroPrep kit (Zymo  
73 Research, Irvine, CA), and was reverse transcribed using PrimeScript RT Reagent kit  
74 (TaKaRa Bio, Otsu, Japan). RT-qPCR was performed on a LightCycler 480 instrument  
75 (Roche, Basel, Switzerland) using TaqMan probes (Thermo Fisher Scientific) listed in  
76 supplementary table 20. While Hs00358836\_m1 was used to detect human *KLF4* in human  
77 samples, Hs00358837\_g1 was used to specifically detect human *KLF4* in mouse samples  
78 based on our preliminary experiments. mRNA levels were normalized with *GAPDH* in  
79 human samples and with *Gapdh* in mouse samples.

80

### 81 **DMM surgery**

82 The mouse surgical OA model was induced by DMM surgery.<sup>4</sup> In brief, the surgical  
83 approach to the knee was the medial parapatellar. The fat pad was dissected, and the medial  
84 meniscus (MM) and the medial meniscotibial ligament (MMTL) were identified. The  
85 MMTL was transected, and the MM was confirmed to be freely displaceable. The operators  
86 were blinded to genotypes and treatment groups. Knees were harvested at 4 or 8 weeks  
87 after surgery for IHC of KLF4 and KLF2, and at 8 weeks postoperatively for histological  
88 scoring.

89

90 **Injection of AAV into mouse knee joints**

91 AAV2/5-CAG-NLS-EGFP (AAV-EGFP) and AAV2/5-CAG-HA-KLF4 (AAV-KLF4) were  
92 produced and titrated by the SBP Functional Genomics core. Under microscopic  
93 observation,  $5 \times 10^9$  vg of AAV diluted in 10  $\mu$ L of PBS was injected into mouse knee  
94 joints per injection. Those who performed injections were aware of the group allocation.

95

96 **Von Frey test**

97 To evaluate mechanical allodynia in mice, von Frey filaments with 5 different target forces  
98 (#1: 0.04 g, #2: 0.16 g, #3: 0.4 g, #4: 1 g and #5: 2 g; Touch Test Sensory Evaluators; North  
99 Coast Medical, Morgan Hill, CA) were used for mechanical stimulation to the plantar  
100 surface of the hind paw, as previously described.<sup>5,6</sup> Numbers of paw withdrawals from 5  
101 stimulations per filament per mouse were counted. Mice were tested in randomized order at  
102 each time point.

103

104 **Histological analyses**

105 Human cartilage tissues from the medial femoral condyle and mouse knee joint tissues  
106 were fixed in Z-fix (Anatech, San Diego, CA) for 2 days and decalcified in TBD-2 (Thermo  
107 Fisher Scientific) for 1 week in human samples and for 2 days in mouse samples. The  
108 samples were embedded in paraffin and were sectioned in 4  $\mu$ m thickness. Safranin-O and  
109 fast green staining was performed according to the standard protocols.

110

Histological scoring of OA for the medial femoral condyle and tibial plateau was

111 performed using the summed OARSI scores (score, 0–48).<sup>7</sup> Meniscus histopathological  
112 scores were graded by Kwok’s meniscus scoring system (score 0–50).<sup>8</sup> Synovial changes  
113 were evaluated using Krenn’s synovitis scoring system (score, 0–9).<sup>9</sup> Bone scores (score,  
114 0–8)<sup>3</sup> were used to assess subchondral bone changes and ectopic ossification. All scorings  
115 were performed blindly.

116

### 117 **IHC**

118 Sections were deparaffinized, washed and blocked with horse serum for 1 hour at room  
119 temperature. They were incubated with primary antibodies shown in supplementary table  
120 21 overnight at 4°C. Rabbit IgG (Vector Laboratories, Burlingame, CA) was used as  
121 negative controls. Then, for IHC of HA tag and GFP, the sections were washed and  
122 incubated with Donkey anti-Rabbit IgG (H+L) Highly Cross-Adsorbed Secondary  
123 Antibody, Alexa Fluor 647 (1:200; Thermo Fisher Scientific) for 1 hour at room  
124 temperature, followed by nuclear staining with Hoechst 33342 (Thermo Fisher Scientific).

125 For IHC of KLF4, immune complexes were detected using ImmPRESS AP Horse  
126 Anti-Rabbit IgG Polymer Detection kit (Vector Laboratories). Vector Red Substrate kit  
127 (Vector Laboratories) was used for alkaline phosphatase development, counterstained with  
128 hematoxylin. For IHC of KLF2, ImmPRESS HRP Horse Anti-Rabbit IgG Polymer  
129 Detection kit (Vector Laboratories) was used for immune detection, and the peroxidase  
130 reaction was developed using DAB Substrate kit (Vector Laboratories), counterstained with  
131 methyl green.

132 For quantification of positive cells in IHC of mouse samples, articular cartilage

133 and subchondral bone in the medial tibial plateau were analyzed, while medial femoral  
134 cartilage was applied for comparison between weight-bearing and non-weight-bearing  
135 regions. The femoral condyle between the anterior and posterior margins of the meniscus  
136 was considered to be weight-bearing regions, while non-weight-bearing regions were  
137 defined as the posterior condyle not covered with the meniscus. In comparison of cartilage  
138 tissues from 6- and 24-month-old mice, and mice after DMM surgery, calculation of  
139 positive cell rates was obtained from fields in the medial tibial plateau. For human cartilage  
140 tissues, areas within 700  $\mu\text{m}$  from the articular surface were included in the analysis.

141

#### 142 **Utilization of an RNA-seq dataset from normal and OA human knee cartilage tissues**

143 Our previous dataset for RNA-seq analysis of normal and OA human knee cartilage tissues  
144 was utilized (GEO accession number: GSE114007).<sup>10</sup> Normal human knee cartilage tissues  
145 were from 13 males and 5 females (age 18–61, mean  $37\pm 3$ ) without history of joint disease  
146 or trauma. OA-affected cartilage was harvested from tissues removed during knee  
147 replacement surgery from 8 males and 12 females (age 51–82, mean  $66\pm 2$ ). Genes with  
148  $\log_2(\text{CPM}) > 3$  in one or more samples were included in the analysis.<sup>10</sup> An FDR was  
149 calculated based on the moderated t-statistic using the Benjamini-Hochberg method.<sup>11</sup>

150

#### 151 **Utilization of a DNA microarray dataset for zone-specific gene expression patterns in** 152 **human knee cartilage tissues**

153 Our previous dataset for DNA microarray analysis for zone-specific gene expression  
154 patterns in human knee cartilage tissues was utilized (GEO accession number:

155 GSE39797).<sup>12</sup> Donors were 3 males and 1 female (age 23–46, mean 34±6) without history  
156 of joint disease or trauma. Data were normalized using a robust multichip average method  
157 (RMA Express, version 1.0; <http://rmaexpress.bmbolstad.com>).

158

### 159 **DRUG-seq analysis**

160 TC28a2 cells were transfected with Ad-EGFP or Ad-KLF4. For samples with IL-1 $\beta$   
161 stimulation, cells were treated with 10 ng/ml of IL-1 $\beta$  for 6 hours before RNA collection,  
162 and RNA was collected 48 hours after adenoviral transfection. DRUG-seq libraries were  
163 constructed using High Throughput RNAseq Prep kit (Twist Bioscience, San Francisco,  
164 CA), and were sequenced by paired-end sequencing on a NextSeq2000 instrument  
165 (Illumina, San Diego, CA) at estimated 5 million reads per sample.

166         The sequence information was initially processed with in-house custom scripts  
167 using BBTools (<https://sourceforge.net/projects/bbmap/>) to obtain demultiplexed reads for  
168 each sample based on the inline barcodes. The 5'-end 10-base barcodes and 3'-end 12-base  
169 UMI information from read1 fastq were first incorporated into read2 fastq as part of  
170 sequence ID using UMI-tools.<sup>13</sup> The read2 sequences were analyzed using the nf-core  
171 RNA-seq pipeline version 1.4.2.<sup>14</sup> They were trimmed for adapters using TrimGalore!  
172 version 0.6.4 ([https://www.bioinformatics.babraham.ac.uk/projects/trim\\_galore/](https://www.bioinformatics.babraham.ac.uk/projects/trim_galore/)) and  
173 aligned to the human genome reference sequence (GRCh38) using STAR version 2.6.1d.<sup>15</sup>  
174 Gene-level assignment was then performed using featureCounts version 1.6.4.<sup>16</sup> The gene  
175 expression matrix with raw gene counts was used for differential gene expression analysis  
176 using the R/Bioconductor DESeq2 package version 1.20.0.<sup>17</sup>



177 The resulting P-values were adjusted using the Benjamini-Hochberg's approach<sup>11</sup>  
178 for controlling the FDRs. Genes with an FDR of <0.05 and a  $|\log_2(\text{FC})| > 1$  were considered  
179 significantly differentially expressed. DAVID Bioinformatics Resources 6.8  
180 (<https://david.ncifcrf.gov/>)<sup>18</sup> was used for KEGG pathway analysis.<sup>19</sup> Pathways satisfying  
181 an FDR <0.05 was considered significant. The raw data were deposited in the Gene  
182 Expression Omnibus ([www.ncbi.nlm.nih.gov/geo/](http://www.ncbi.nlm.nih.gov/geo/)) under accession no. GSE183956.

183

#### 184 **ChIP-seq analysis**

185 TC28a2 cells transfected with an HA-KLF4 vector or an empty vector were used for ChIP-  
186 seq analysis. ChIP was performed generally as previously described<sup>20-22</sup>, with some  
187 modifications. In brief,  $2 \times 10^7$  cells were cross-linked with 1% formaldehyde, and the  
188 crosslinking was quenched by glycine. After lysis of cells, chromatin was fragmented by  
189 sonication (Covaris S220; Covaris Inc., Woburn, MA). Dynabeads (M-280 sheep anti-  
190 rabbit IgG; Thermo Fisher Scientific), bound with anti-HA tag antibody (25  $\mu\text{L}$  per  $10^7$   
191 cells; clone C29F4; Cell Signaling Technology, Danvers, MA) or rabbit IgG (Cell Signaling  
192 Technology), were incubated with the fragmented DNA lysate overnight at 4°C. After  
193 washing beads with RIPA buffer, DNA was eluted with elution buffer for 15 min at 65°C,  
194 and the eluate was incubated overnight at 65°C for reverse crosslinking. DNA was purified  
195 using a MinElute PCR Purification kit (Qiagen, Hilden, Germany). All buffers were  
196 supplemented with cOmplete EDTA-free protease inhibitor cocktail (Roche). ChIP-seq and  
197 input libraries were constructed with a ThruPLEX DNA-seq kit (Takara Bio) according to  
198 the manufacturer's instructions and purified using AMPure XP beads. Library quality was

199 validated using an Agilent 2100 Bioanalyzer (Agilent), and approximately 85–165 million  
200 100-bp reads were obtained by single-end sequencing with NovaSeq2000 (Illumina). Two  
201 independent replicates were analyzed for the ChIP-seq samples. The raw data were  
202 deposited in the Gene Expression Omnibus ([www.ncbi.nlm.nih.gov/geo/](http://www.ncbi.nlm.nih.gov/geo/)) under accession  
203 no. GSE183956.

204         The nf-core/chipseq pipeline (version 1.2.2; <https://github.com/nf-core/chipseq>)  
205 written in the Nextflow domain specific language was used to perform the primary  
206 analysis<sup>14</sup>, and all data were processed relative to the human genome reference sequence  
207 (GRCh38). Burrows-Wheeler Aligner version 0.7.17 ([https://sourceforge.net/projects/bio-  
208 bwa/files/](https://sourceforge.net/projects/bio-bwa/files/)) was utilized to align the sequence reads to the reference genome.<sup>23</sup> Peak calling  
209 was performed by MACS version 2.2.7.1 (<https://pypi.org/project/MACS2/>) with a cutoff  
210 of FDR <0.01.<sup>24</sup> Peak intersection between replicates was executed with BEDTools version  
211 2.26.0.<sup>25</sup> Genomic Regions Enrichment of Annotations Tool version 4.0.4  
212 (<http://great.stanford.edu/public/html/>) was used for peak distribution in genome and gene  
213 ontology analysis.<sup>26</sup> Each peak category was run against a whole genome background with  
214 assembly GRCh38. Putative gene regulatory domains utilized for region annotation were  
215 defined as minimum 5 kilobase (kb) upstream and 1 kb downstream of the transcriptional  
216 start site, and extended up to 1,000 kb to the nearest gene's minimal regulatory domain.  
217 Homer version 4.11 (<http://homer.ucsd.edu/homer/>) was used to find enriched motifs in the  
218 obtained ChIP-seq peaks and to recover the motif locations.<sup>27</sup> The Integrative Genomics  
219 Viewer version 2.10.3 (<https://software.broadinstitute.org/software/igv/home>) was used to  
220 visualize aligned reads.<sup>28</sup> Annotations for enhancers were based on previously reported

221 studies.<sup>29-32</sup>

222

### 223 **Statistical analysis**

224 All quantitative data are expressed as means  $\pm$  SE (standard error). Results were analyzed  
225 using GraphPad Prism version 9.3.1 (GraphPad Software, San Diego, CA). In statistical  
226 analyses of RT-qPCR data, log<sub>2</sub> transformed values were used to assume normal  
227 distribution. In linear regression model analyses, heteroscedasticity and normal distribution  
228 of the residuals were checked using residual plots, homoscedasticity plots and Q-Q plots,  
229 respectively. Results of omnibus tests for multiple comparisons are shown in supplementary  
230 table 2, and other statistical tests used are all described in each figure legend. P-values  
231 below 0.05 were considered significant.

232

### 233 **REFERENCES**

- 234 1. Lee JS, Yu Q, Shin JT, et al. Klf2 is an essential regulator of vascular hemodynamic forces  
235 in vivo. *Dev Cell* 2006;11(6):845-57. doi: 10.1016/j.devcel.2006.09.006 [published  
236 Online First: 2006/12/05]
- 237 2. Henry SP, Jang CW, Deng JM, et al. Generation of aggrecan-CreERT2 knockin mice for  
238 inducible Cre activity in adult cartilage. *Genesis* 2009;47(12):805-14. doi:  
239 10.1002/dvg.20564 [published Online First: 2009/10/16]
- 240 3. Matsuzaki T, Alvarez-Garcia O, Mokuda S, et al. FoxO transcription factors modulate  
241 autophagy and proteoglycan 4 in cartilage homeostasis and osteoarthritis. *Sci Transl*  
242 *Med* 2018;10(428) doi: 10.1126/scitranslmed.aan0746 [published Online First:  
243 2018/02/16]
- 244 4. Glasson SS, Blanchet TJ, Morris EA. The surgical destabilization of the medial meniscus  
245 (DMM) model of osteoarthritis in the 129/SvEv mouse. *Osteoarthritis Cartilage*  
246 2007;15(9):1061-9. doi: 10.1016/j.joca.2007.03.006 [published Online First:

- 247 2007/05/02]
- 248 5. Deuis JR, Dvorakova LS, Vetter I. Methods Used to Evaluate Pain Behaviors in Rodents.  
249 *Front Mol Neurosci* 2017;10:284. doi: 10.3389/fnmol.2017.00284 [published Online  
250 First: 2017/09/22]
- 251 6. Tran PB, Miller RE, Ishihara S, et al. Spinal microglial activation in a murine surgical  
252 model of knee osteoarthritis. *Osteoarthritis Cartilage* 2017;25(5):718-26. doi:  
253 10.1016/j.joca.2016.09.007 [published Online First: 2016/09/21]
- 254 7. Pritzker KP, Gay S, Jimenez SA, et al. Osteoarthritis cartilage histopathology: grading and  
255 staging. *Osteoarthritis Cartilage* 2006;14(1):13-29. doi: 10.1016/j.joca.2005.07.014  
256 [published Online First: 2005/10/26]
- 257 8. Kwok J, Onuma H, Olmer M, et al. Histopathological analyses of murine menisci:  
258 implications for joint aging and osteoarthritis. *Osteoarthritis Cartilage*  
259 2016;24(4):709-18. doi: 10.1016/j.joca.2015.11.006 [published Online First:  
260 2015/11/21]
- 261 9. Krenn V, Morawietz L, Haupl T, et al. Grading of chronic synovitis--a histopathological  
262 grading system for molecular and diagnostic pathology. *Pathol Res Pract*  
263 2002;198(5):317-25. doi: 10.1078/0344-0338-5710261 [published Online First:  
264 2002/07/03]
- 265 10. Fisch KM, Gamini R, Alvarez-Garcia O, et al. Identification of transcription factors  
266 responsible for dysregulated networks in human osteoarthritis cartilage by global  
267 gene expression analysis. *Osteoarthritis Cartilage* 2018;26(11):1531-38. doi:  
268 10.1016/j.joca.2018.07.012 [published Online First: 2018/08/07]
- 269 11. Benjamini Y, Drai D, Elmer G, et al. Controlling the false discovery rate in behavior  
270 genetics research. *Behav Brain Res* 2001;125(1-2):279-84. doi: 10.1016/s0166-  
271 4328(01)00297-2 [published Online First: 2001/10/30]
- 272 12. Grogan SP, Duffy SF, Pauli C, et al. Zone-specific gene expression patterns in articular  
273 cartilage. *Arthritis Rheum* 2013;65(2):418-28. doi: 10.1002/art.37760 [published  
274 Online First: 2012/11/06]
- 275 13. Smith T, Heger A, Sudbery I. UMI-tools: modeling sequencing errors in Unique  
276 Molecular Identifiers to improve quantification accuracy. *Genome Res*  
277 2017;27(3):491-99. doi: 10.1101/gr.209601.116 [published Online First: 2017/01/20]
- 278 14. Ewels PA, Peltzer A, Fillinger S, et al. The nf-core framework for community-curated  
279 bioinformatics pipelines. *Nature biotechnology* 2020;38(3):276-78. doi:

- 280 10.1038/s41587-020-0439-x [published Online First: 2020/02/15]
- 281 15. Dobin A, Davis CA, Schlesinger F, et al. STAR: ultrafast universal RNA-seq aligner.  
282 *Bioinformatics* 2013;29(1):15-21. doi: 10.1093/bioinformatics/bts635 [published  
283 Online First: 2012/10/30]
- 284 16. Liao Y, Smyth GK, Shi W. featureCounts: an efficient general purpose program for  
285 assigning sequence reads to genomic features. *Bioinformatics* 2014;30(7):923-30.  
286 doi: 10.1093/bioinformatics/btt656 [published Online First: 2013/11/15]
- 287 17. Love MI, Huber W, Anders S. Moderated estimation of fold change and dispersion for  
288 RNA-seq data with DESeq2. *Genome biology* 2014;15(12):550. doi:  
289 10.1186/s13059-014-0550-8 [published Online First: 2014/12/18]
- 290 18. Huang da W, Sherman BT, Lempicki RA. Systematic and integrative analysis of large  
291 gene lists using DAVID bioinformatics resources. *Nature protocols* 2009;4(1):44-57.  
292 doi: 10.1038/nprot.2008.211 [published Online First: 2009/01/10]
- 293 19. Kanehisa M, Goto S. KEGG: kyoto encyclopedia of genes and genomes. *Nucleic acids*  
294 *research* 2000;28(1):27-30. doi: 10.1093/nar/28.1.27 [published Online First:  
295 1999/12/11]
- 296 20. Kawata M, Mori D, Kanke K, et al. Simple and Robust Differentiation of Human  
297 Pluripotent Stem Cells toward Chondrocytes by Two Small-Molecule Compounds.  
298 *Stem cell reports* 2019;13(3):530-44. doi: 10.1016/j.stemcr.2019.07.012 [published  
299 Online First: 2019/08/08]
- 300 21. Hojo H, Ohba S, He X, et al. Sp7/Osterix Is Restricted to Bone-Forming Vertebrates  
301 where It Acts as a Dlx Co-factor in Osteoblast Specification. *Dev Cell*  
302 2016;37(3):238-53. doi: 10.1016/j.devcel.2016.04.002 [published Online First:  
303 2016/04/28]
- 304 22. Ohba S, He X, Hojo H, et al. Distinct Transcriptional Programs Underlie Sox9 Regulation  
305 of the Mammalian Chondrocyte. *Cell reports* 2015;12(2):229-43. doi:  
306 10.1016/j.celrep.2015.06.013 [published Online First: 2015/07/07]
- 307 23. Li H, Durbin R. Fast and accurate short read alignment with Burrows-Wheeler transform.  
308 *Bioinformatics* 2009;25(14):1754-60. doi: 10.1093/bioinformatics/btp324 [published  
309 Online First: 2009/05/20]
- 310 24. Zhang Y, Liu T, Meyer CA, et al. Model-based analysis of ChIP-Seq (MACS). *Genome*  
311 *biology* 2008;9(9):R137. doi: 10.1186/gb-2008-9-9-r137 [published Online First:  
312 2008/09/19]

- 313 25. Quinlan AR, Hall IM. BEDTools: a flexible suite of utilities for comparing genomic  
314 features. *Bioinformatics* 2010;26(6):841-2. doi: 10.1093/bioinformatics/btq033  
315 [published Online First: 2010/01/30]
- 316 26. McLean CY, Bristor D, Hiller M, et al. GREAT improves functional interpretation of cis-  
317 regulatory regions. *Nature biotechnology* 2010;28(5):495-501. doi: 10.1038/nbt.1630  
318 [published Online First: 2010/05/04]
- 319 27. Bailey TL, Boden M, Buske FA, et al. MEME SUITE: tools for motif discovery and  
320 searching. *Nucleic acids research* 2009;37(Web Server issue):W202-8. doi:  
321 10.1093/nar/gkp335 [published Online First: 2009/05/22]
- 322 28. Robinson JT, Thorvaldsdottir H, Winckler W, et al. Integrative genomics viewer. *Nature*  
323 *biotechnology* 2011;29(1):24-6. doi: 10.1038/nbt.1754 [published Online First:  
324 2011/01/12]
- 325 29. Yao B, Wang Q, Liu CF, et al. The SOX9 upstream region prone to chromosomal  
326 aberrations causing campomelic dysplasia contains multiple cartilage enhancers.  
327 *Nucleic acids research* 2015;43(11):5394-408. doi: 10.1093/nar/gkv426 [published  
328 Online First: 20150504]
- 329 30. Bagheri-Fam S, Barrionuevo F, Dohrmann U, et al. Long-range upstream and  
330 downstream enhancers control distinct subsets of the complex spatiotemporal Sox9  
331 expression pattern. *Developmental biology* 2006;291(2):382-97. doi:  
332 10.1016/j.ydbio.2005.11.013 [published Online First: 20060203]
- 333 31. Bell DM, Leung KK, Wheatley SC, et al. SOX9 directly regulates the type-II collagen  
334 gene. *Nature genetics* 1997;16(2):174-8. doi: 10.1038/ng0697-174 [published Online  
335 First: 1997/06/01]
- 336 32. Yasuda H, Oh CD, Chen D, et al. A Novel Regulatory Mechanism of Type II Collagen  
337 Expression via a SOX9-dependent Enhancer in Intron 6. *The Journal of biological*  
338 *chemistry* 2017;292(2):528-38. doi: 10.1074/jbc.M116.758425 [published Online  
339 First: 20161123]

340

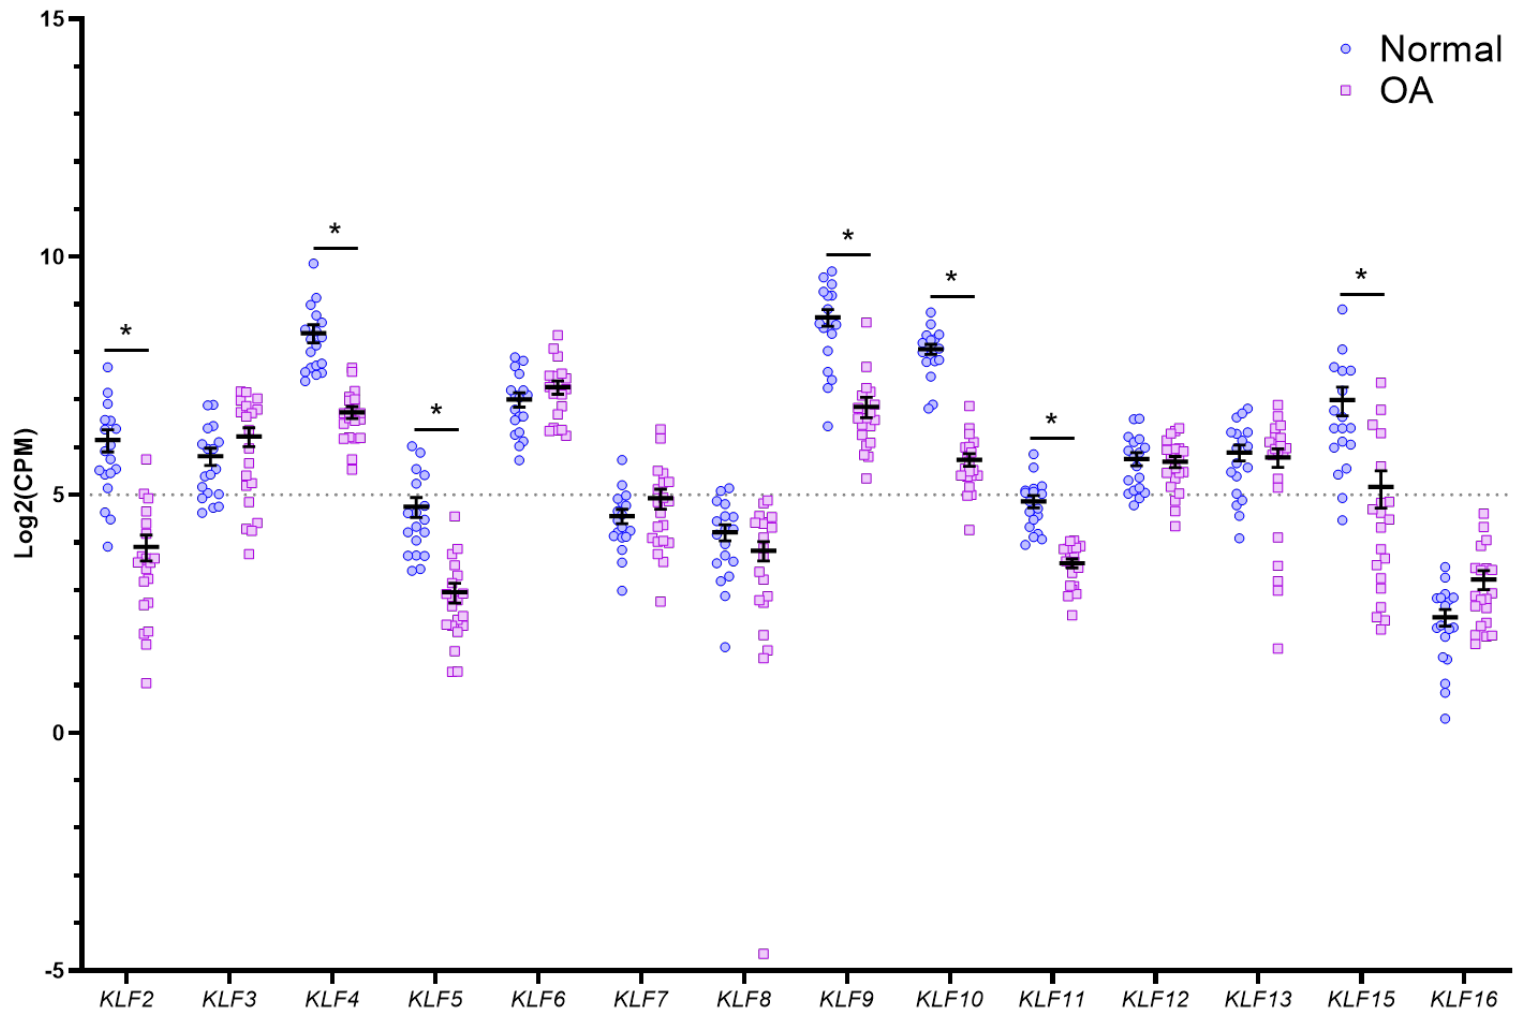

**Supplementary figure 1. RNA-seq analysis of KLF family genes in normal and OA human knee cartilage tissues.** Normal human knee cartilage tissues were from 13 males and 5 females (age 18–61, mean  $37 \pm 3$ ) without history of joint disease or trauma. OA-affected cartilage was harvested from tissues removed during knee replacement surgery from 8 males and 12 females (age 51–82, mean  $66 \pm 2$ ). Log2(counts per million reads mapped [CPM]) are expressed as means  $\pm$  SE. A grey dotted line indicates  $\log_2(\text{CPM})=5$ . \*FDR<0.05.

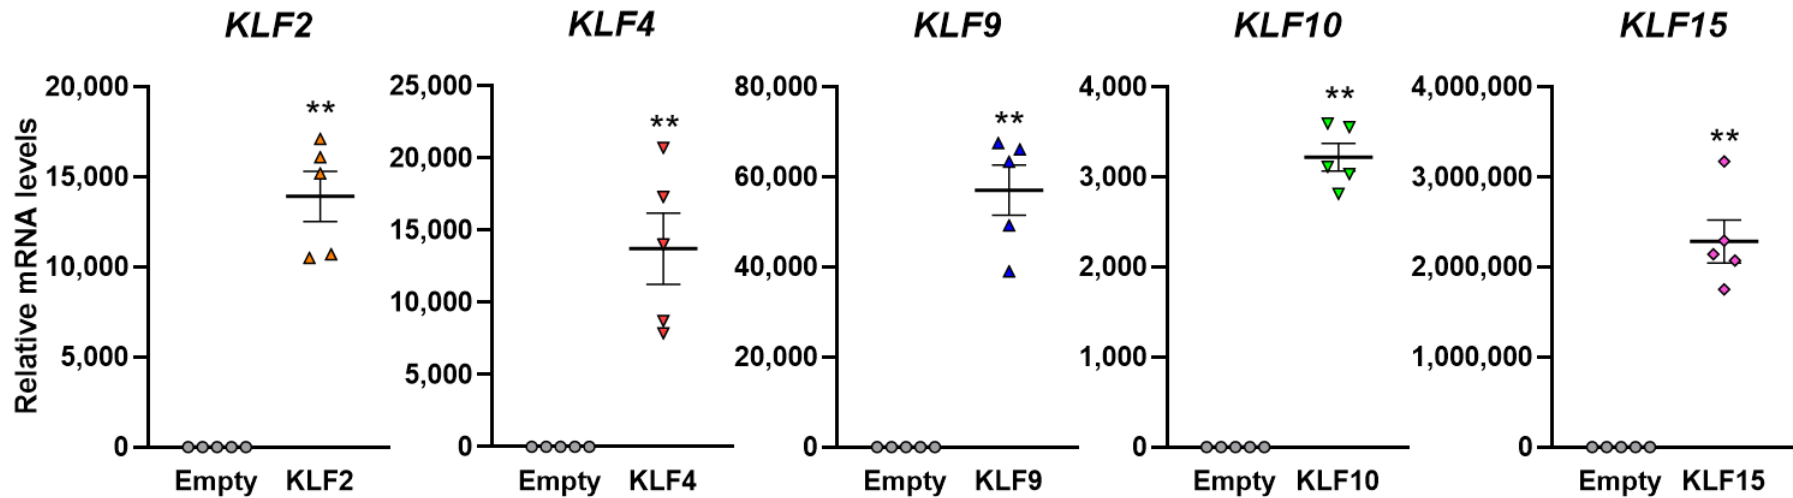

**Supplementary figure 2. Transfection of KLF expression vectors in TC28a2 cells.** Cells were transfected with an empty vector, or expression vectors for either KLF2, KLF4, KLF9, KLF10 or KLF15, and RNA was collected 48 hours after transfection. mRNA levels are expressed as means  $\pm$  SE, relative to empty vector (n=5 from five independent experiments). \*P<0.05, \*\*P<0.01 versus empty vector, paired t-test.



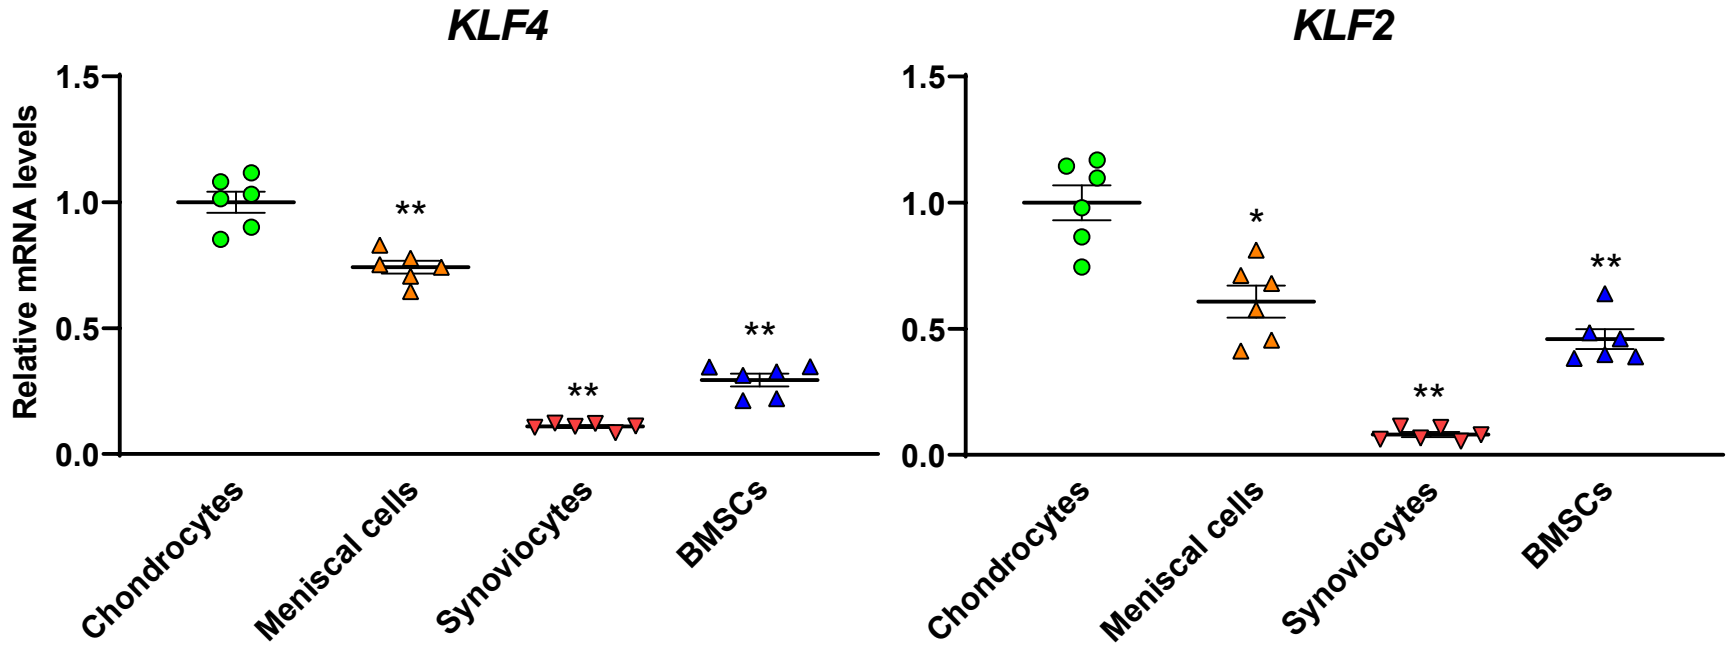

**Supplementary figure 3. Expression of *KLF4* and *KLF2* in each cell type of human primary cells.** mRNA levels are expressed as means  $\pm$  SE, relative to chondrocytes (n=6 for each cell type). \*P<0.05, \*\*P<0.01 versus chondrocytes, Dunnett's T3 test. Results of Welch's ANOVA test are shown in supplementary table 2.

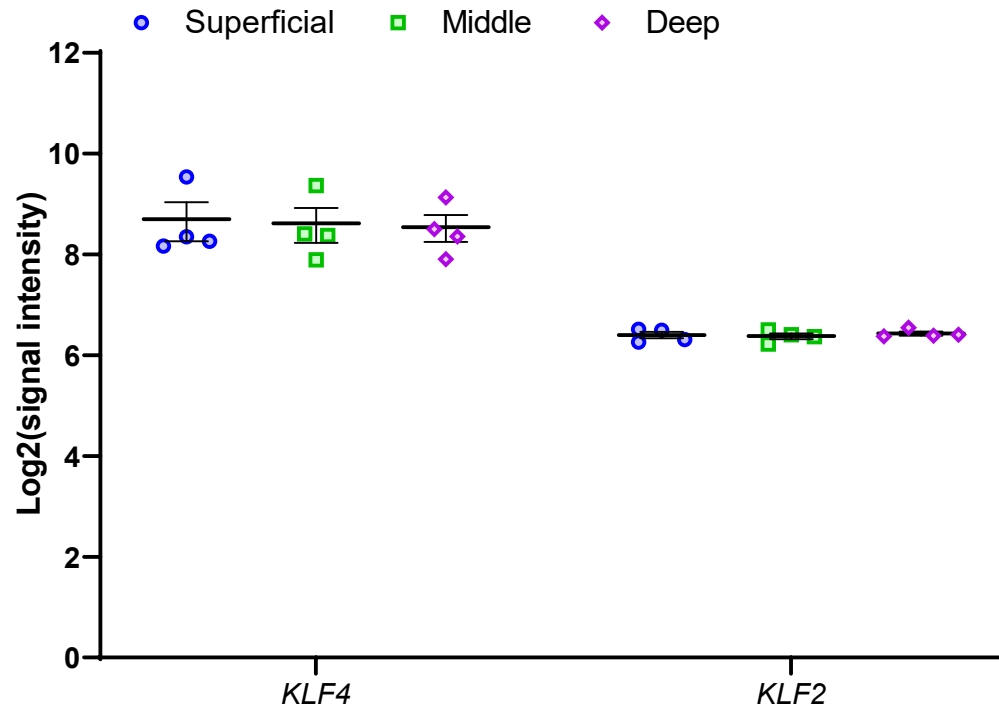

**Supplementary figure 4. DNA microarray analysis of *KLF4* and *KLF2* in each zone of human knee cartilage.** Normal human knee cartilage tissues were from 3 males and 1 female (age 23 to 46, mean  $34 \pm 6$ ) without history of joint disease or trauma. Normalized signal intensities in log<sub>2</sub> scale are expressed as means  $\pm$  SE.

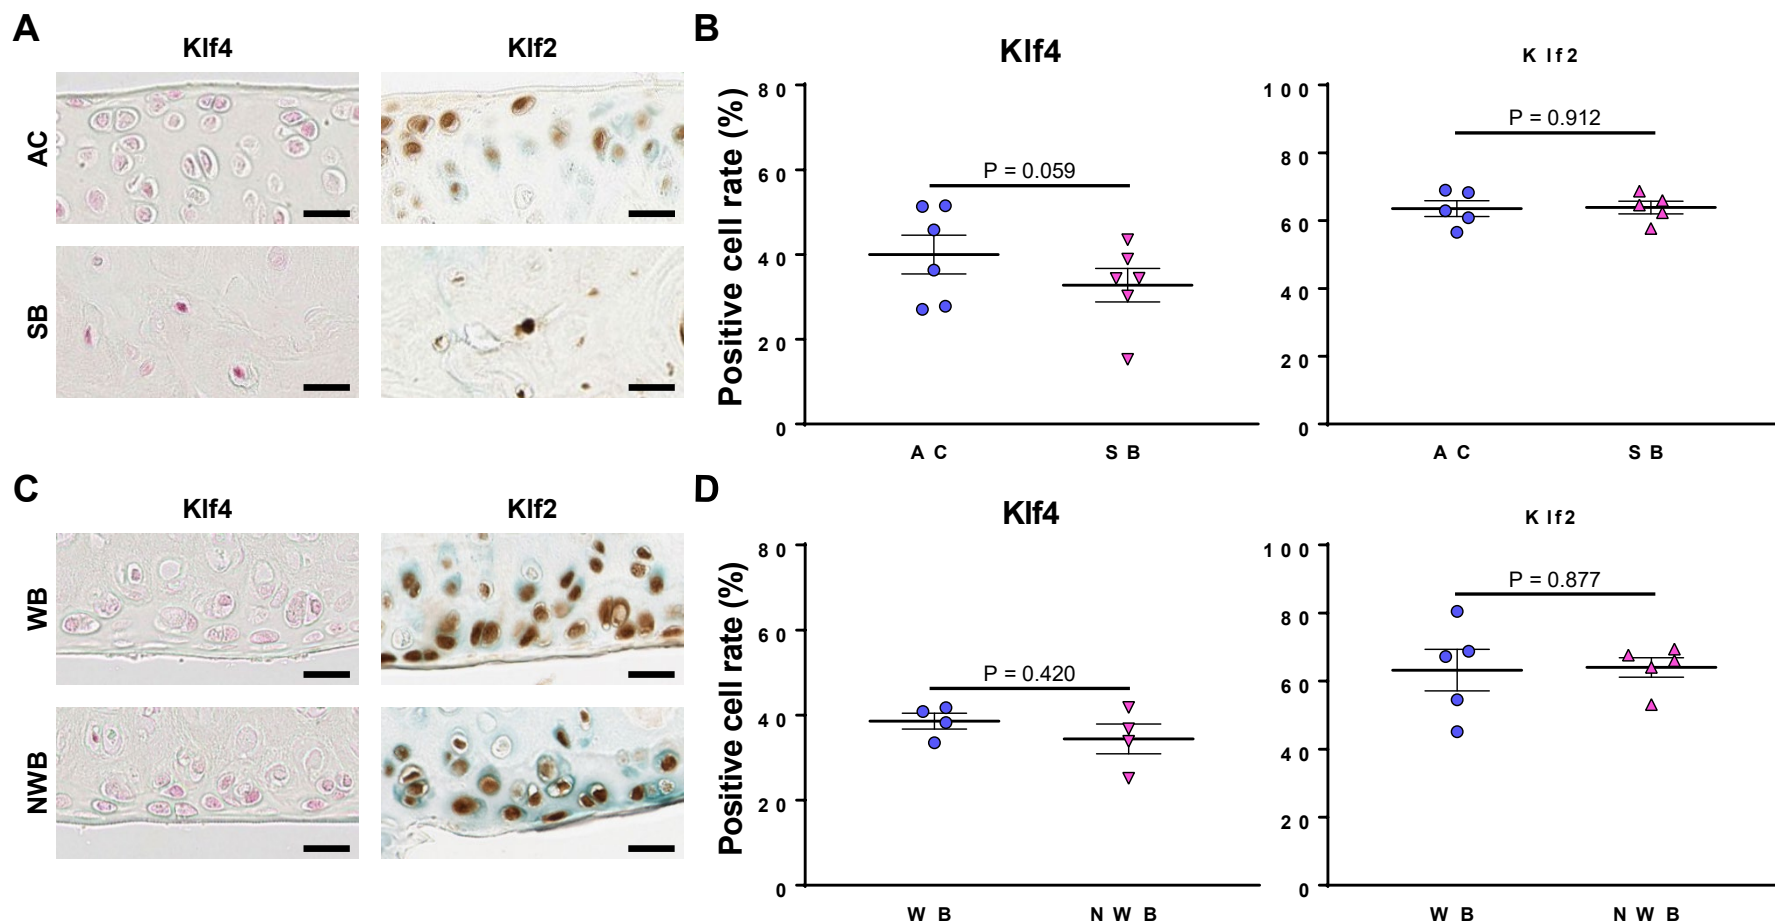

**Supplementary figure 5. IHC analyses of KLF4 and KLF2 in mouse knee joints.** IHC for Klf4 and Klf2 was performed in 6-month-old mouse knee joints. (A and B) Articular cartilage (AC) and subchondral bone (SB) in the medial tibial plateau were compared (n=5–6 per condition). (C and D) Weight-bearing (WB) and non-weight-bearing (NWB) regions of medial femoral cartilage were compared (n=4–5 per condition). \*P<0.05, paired t-test. All quantitative data are expressed as means  $\pm$  SE. Scale bars, 20  $\mu$ m.

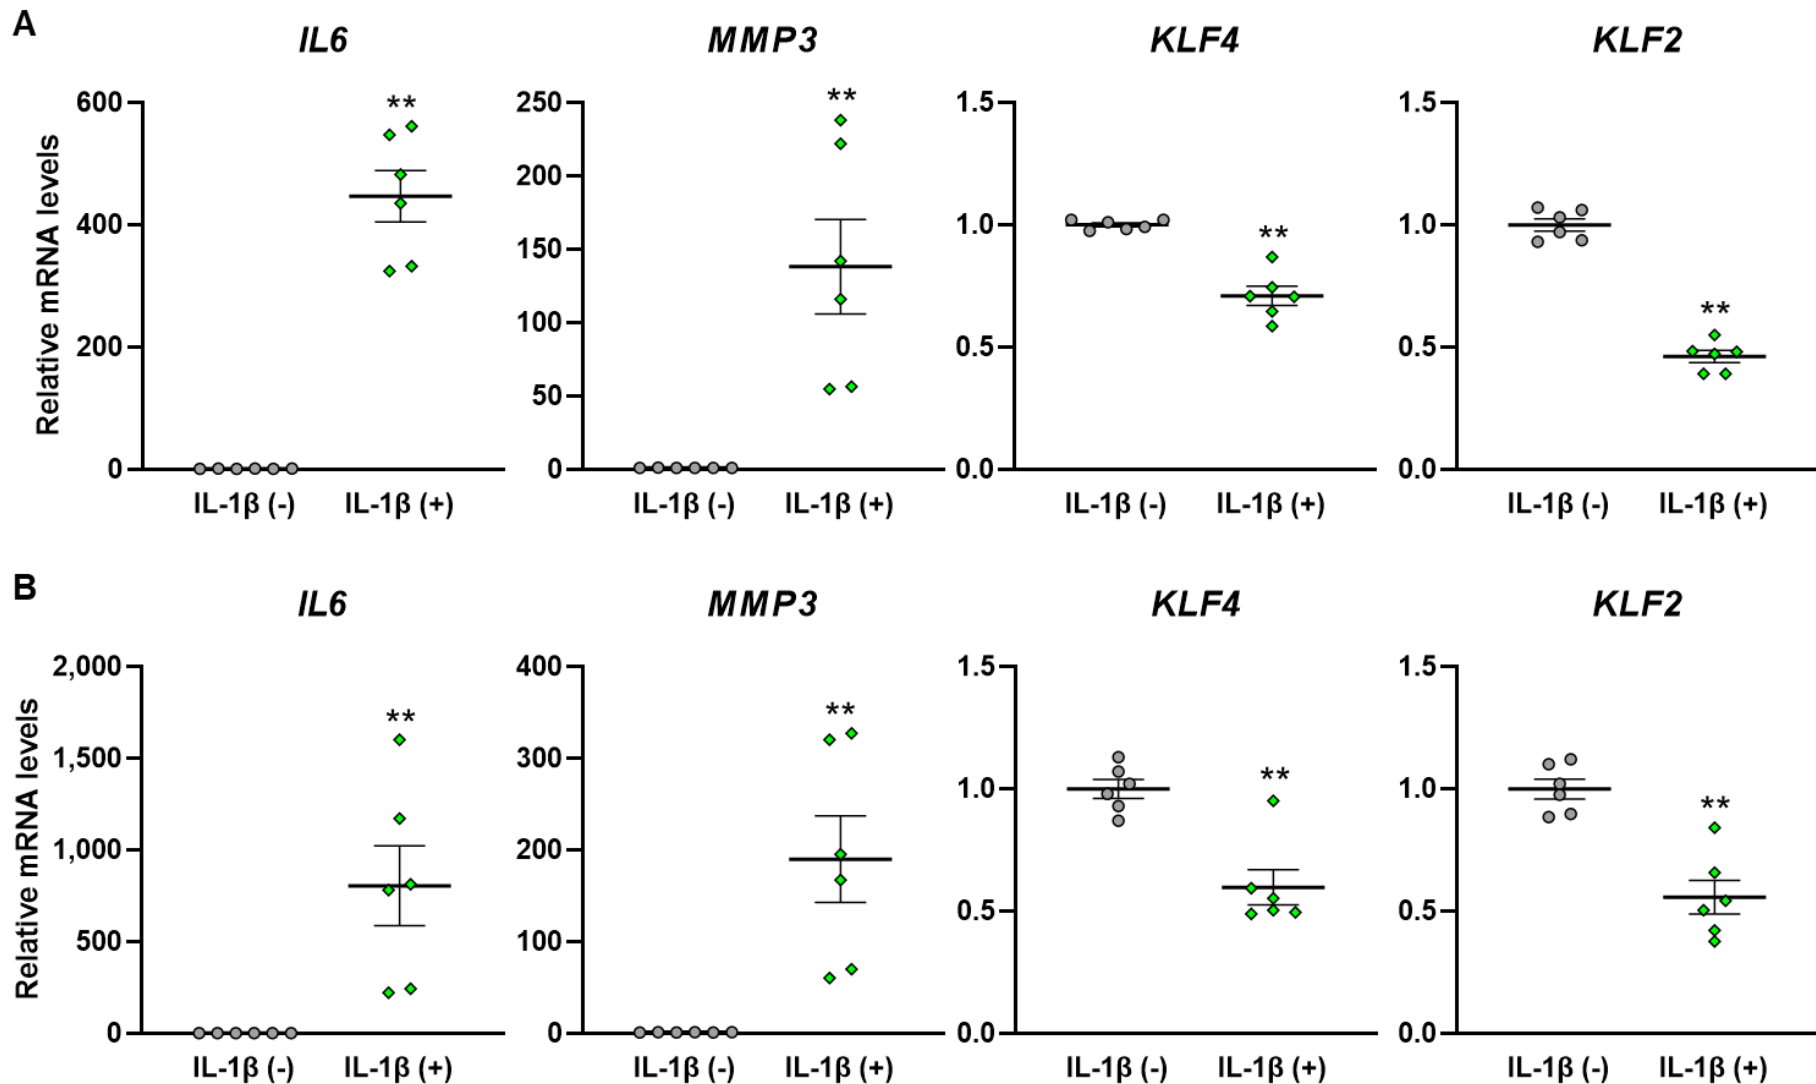

**Supplementary figure 6. Expression changes of *KLF4* and *KLF2* in human normal chondrocytes with treatment of IL-1 $\beta$ .** Cells were treated with 20 ng/ml of IL-1 $\beta$ , and RNA was collected 24 hours (A) and 48 hours (B) after initiation of treatment. mRNA levels are expressed as means  $\pm$  SE, relative to IL-1 $\beta$  (-) (n=6). \*P<0.05, \*\*P<0.01 versus IL-1 $\beta$  (-), paired t-test.

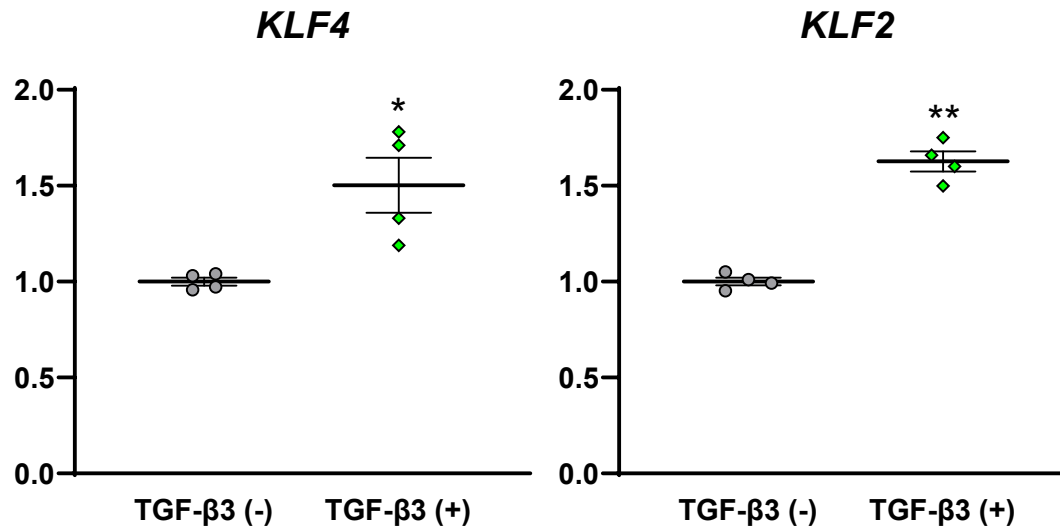

**Supplementary figure 7. Expression changes of *KLF4* and *KLF2* in human OA chondrocytes with treatment of TGF-β3.** Cells were treated with 20 ng/ml of TGF-β3, and RNA was collected 48 hours after initiation of treatment. mRNA levels are expressed as means  $\pm$  SE, relative to TGF-β3 (-) (n=4). \*P<0.05, \*\*P<0.01 versus TGF-β3 (-), paired t-test.

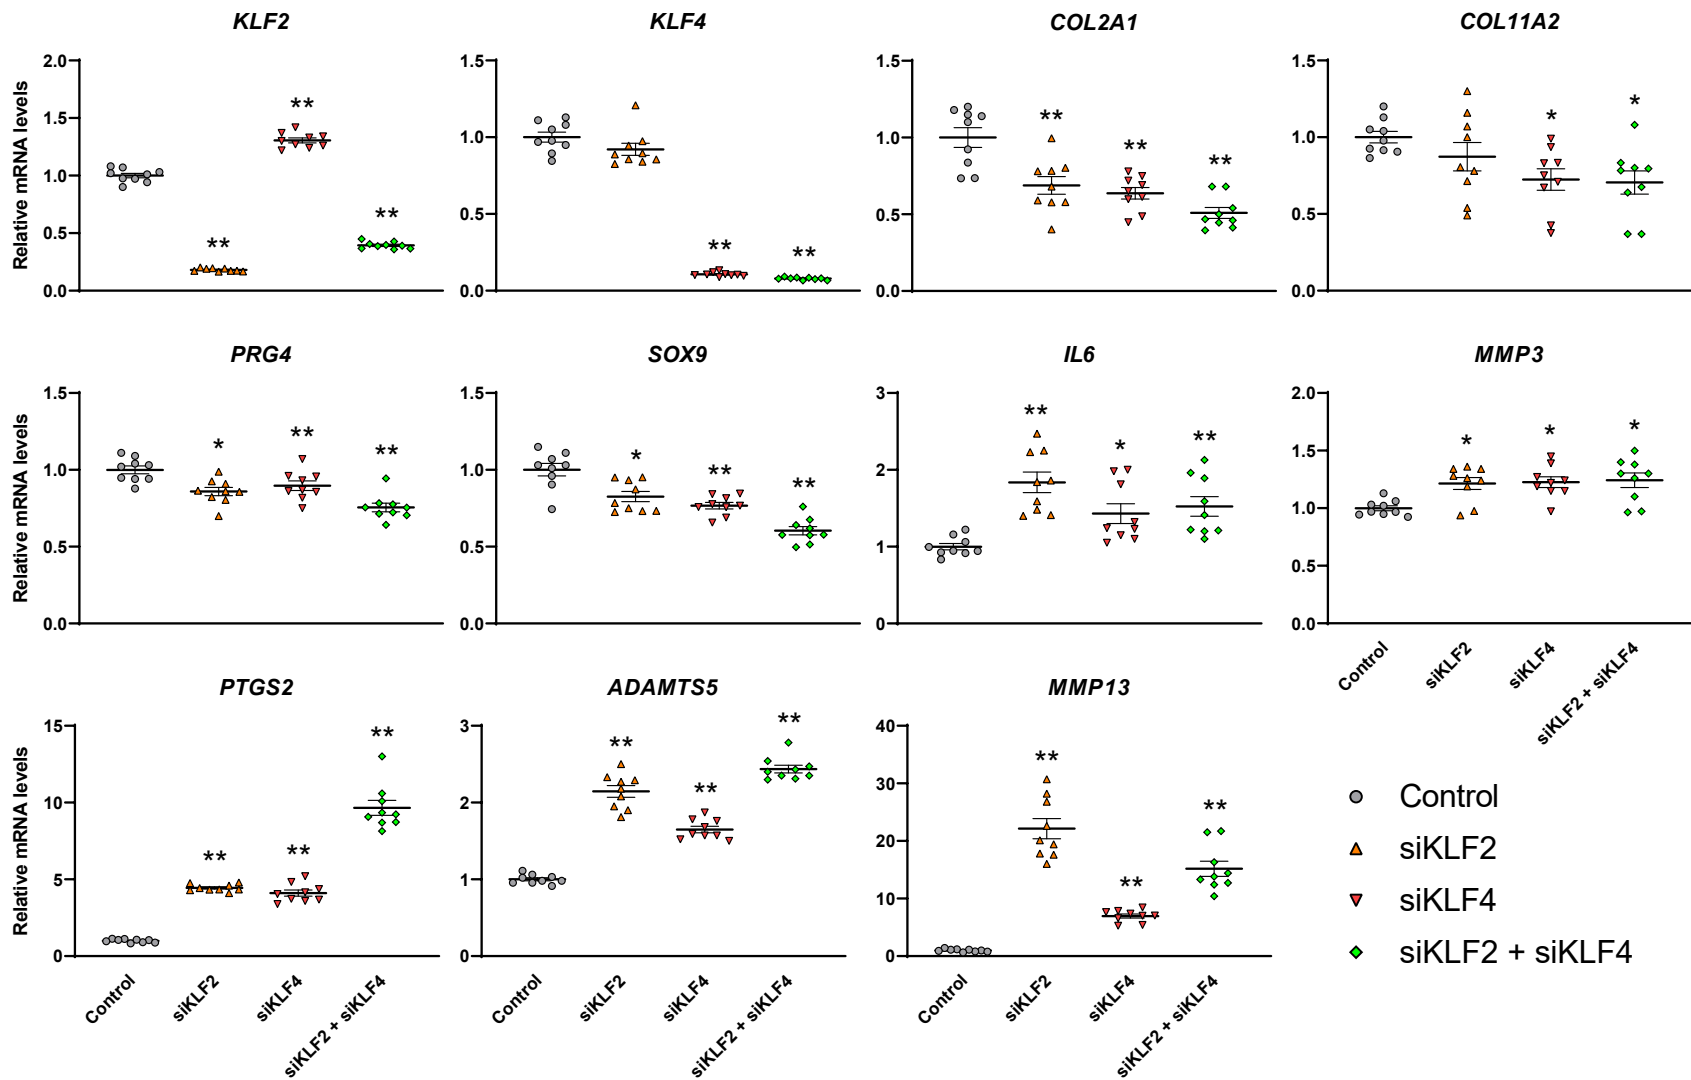

**Supplementary figure 8. siRNA knockdown of KLF2 and KLF4 in human normal chondrocytes.** Cells were transfected with siRNAs, and RNA was collected 48 hours after transfection. mRNA levels are expressed as means  $\pm$  SE, relative to control (n=9). \*P<0.05, \*\*P<0.01 versus control, Dunnett's test. Results of one-way mixed-effects ANOVA test are shown in supplementary table 2.

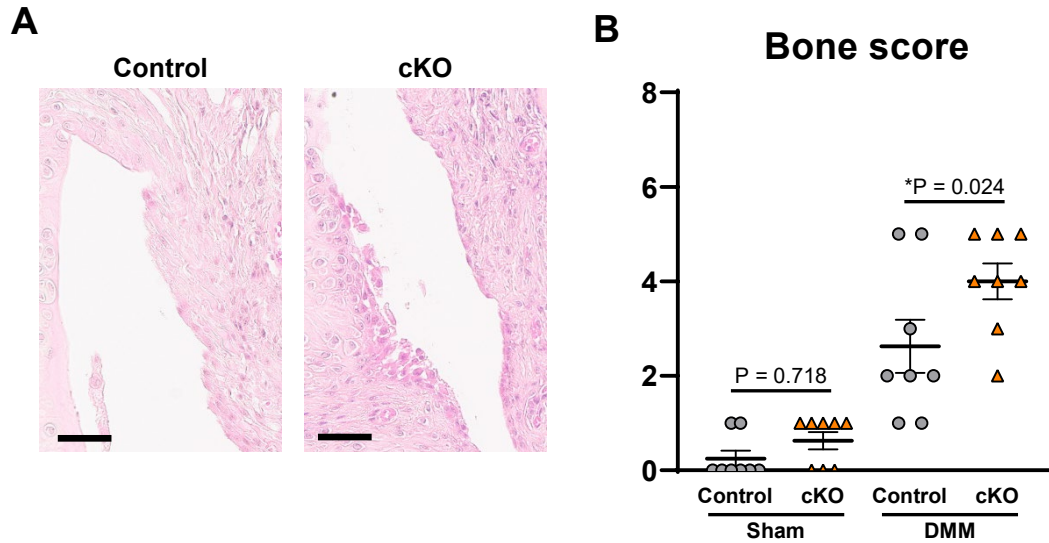

**Supplementary figure 9. Histological evaluation of knee samples from cKO and littermate control mice.** (A) Representative hematoxylin and eosin staining images of the synovium from knee joints of control and cKO mice with DMM surgery. Scale bars, 50  $\mu$ m. (B) Bone scores. \*P<0.05, Sidak's multiple comparison test. All quantitative data are expressed as means  $\pm$  SE, and results of two-way ANOVA test are shown in supplementary table 2.

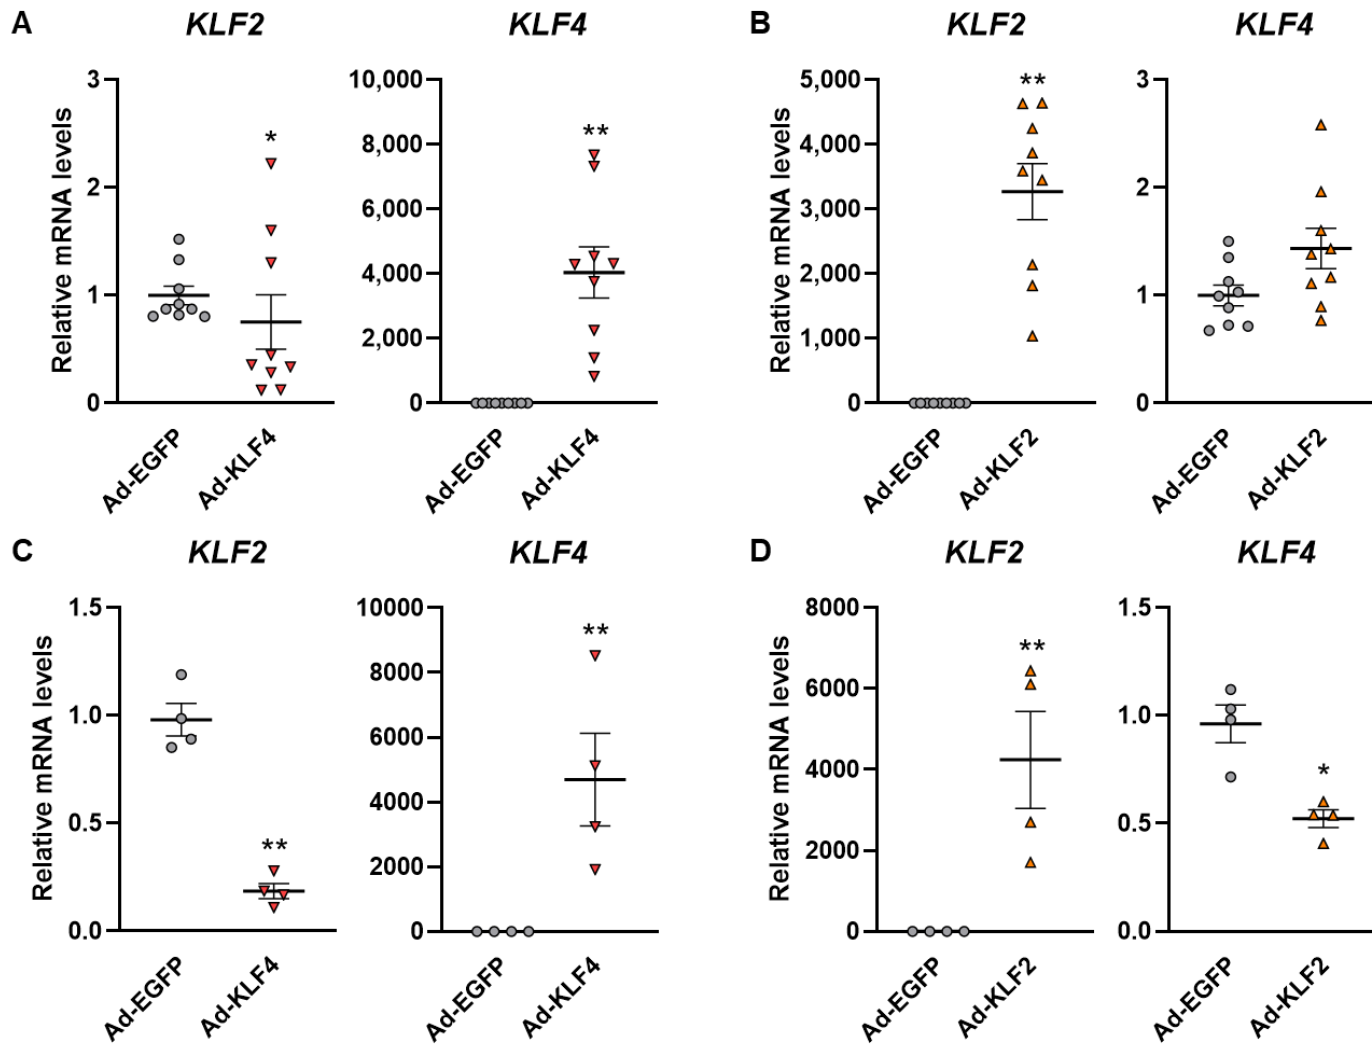

**Supplementary figure 10. Ad-KLF4 and Ad-KLF2 treatment of human OA chondrocytes and meniscal cells.** (A and B) Human OA chondrocytes were transfected with adenovirus (Ad-KLF4 or Ad-EGFP for (A), and Ad-KLF2 or Ad-EGFP for (B)), and RNA was collected 48 hours after transfection (n=9). (C and D) Human meniscal cells were transfected with adenovirus (Ad-KLF4 or Ad-EGFP for (C), and Ad-KLF2 or Ad-EGFP for (D)), and RNA was collected 48 hours after transfection (n=4). mRNA levels are expressed as means  $\pm$  SE, relative to Ad-EGFP. \*P<0.05, \*\*P<0.01 versus Ad-EGFP, paired t-test.



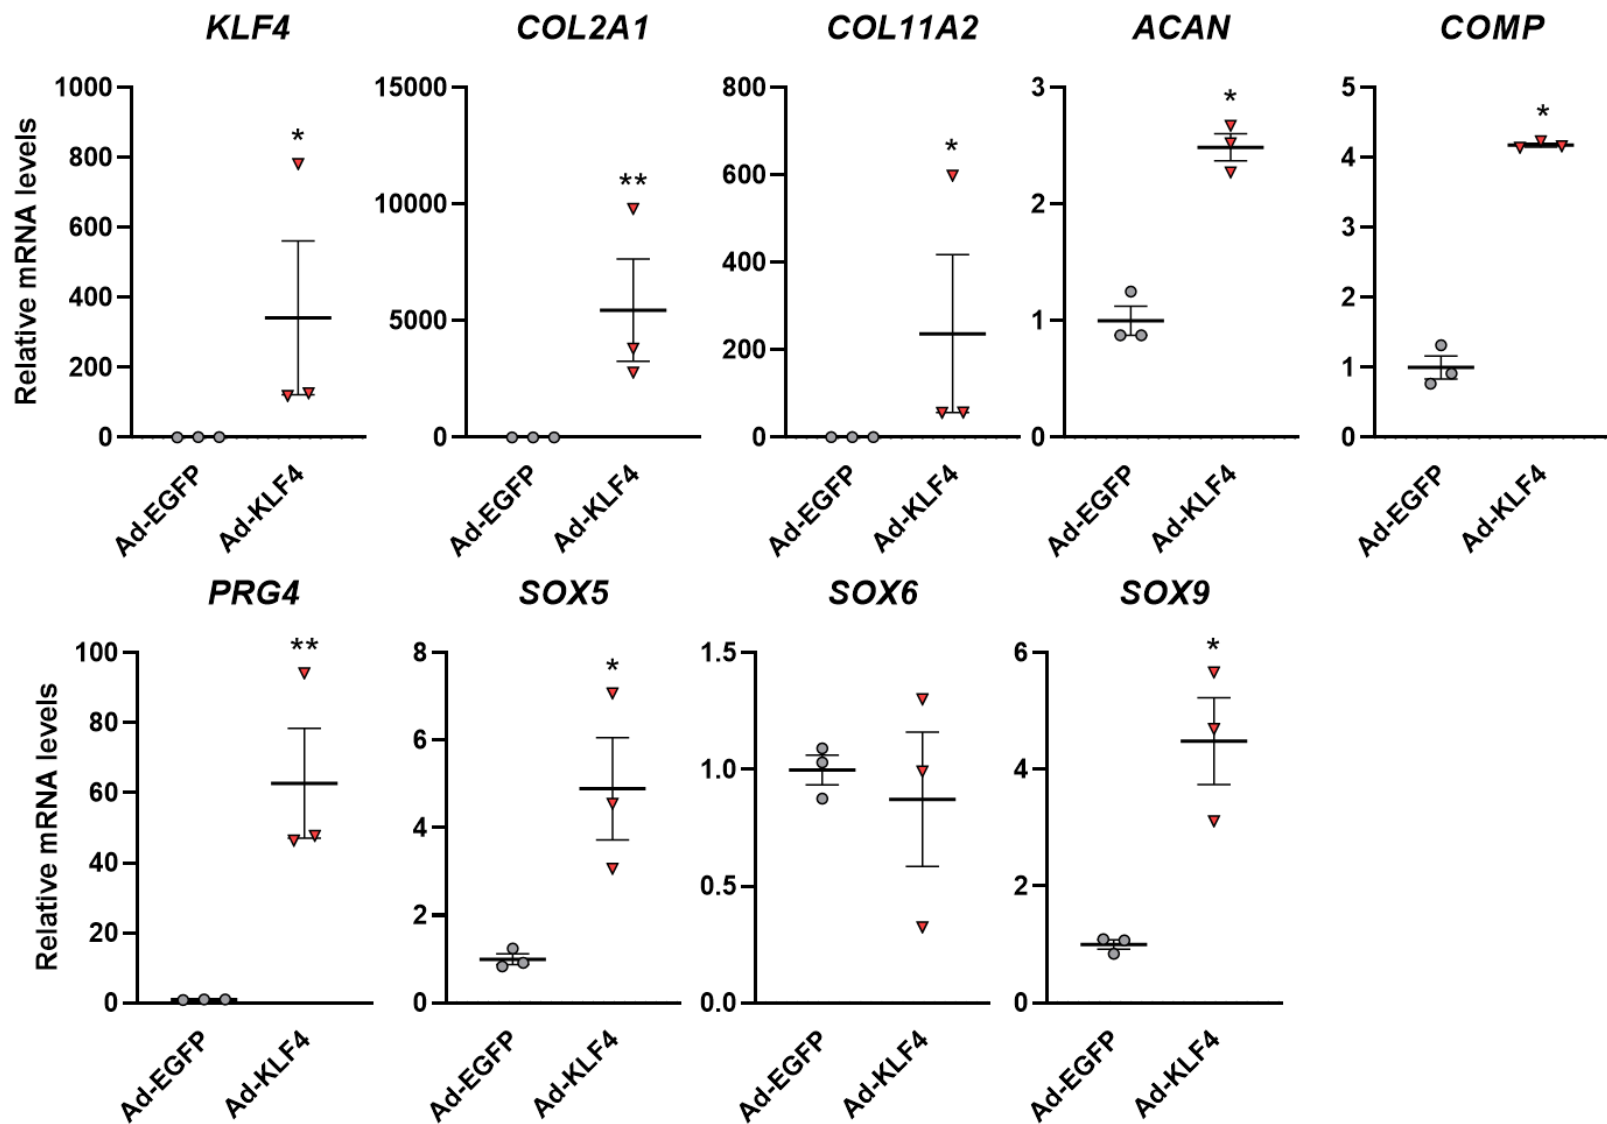

**Supplementary figure 11. Regulation of chondrogenic genes by KLF4 in BMSCs during monolayer culture.** Cells were transfected with Ad-KLF4 or Ad-EGFP, and RNA was collected 48 hours after transfection. mRNA levels are expressed as means  $\pm$  SE., relative to Ad-EGFP (n=3). \*P<0.05, \*\*P<0.01 versus Ad-EGFP, paired t-test.

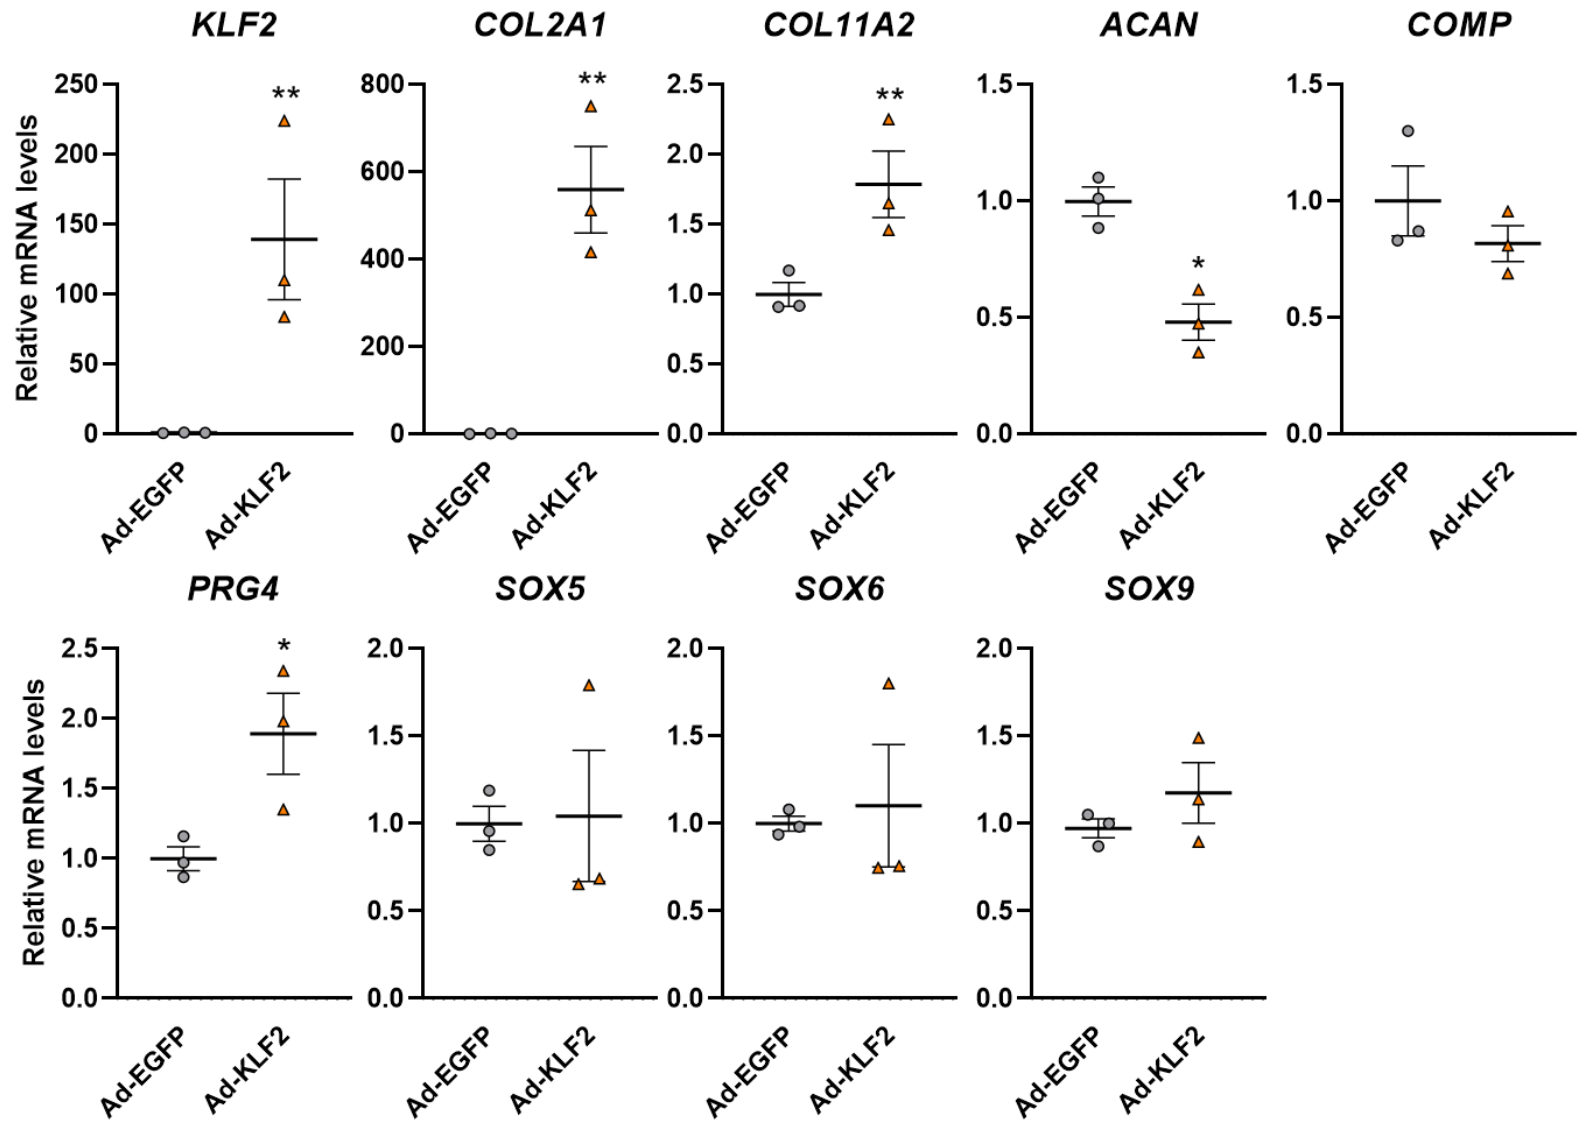

**Supplementary figure 12. Regulation of chondrogenic genes by KLF2 in BMSCs during monolayer culture.** Cells were transfected with Ad-KLF2 or Ad-EGFP, and RNA was collected 48 hours after transfection. mRNA levels are expressed as means  $\pm$  SE, relative to Ad-EGFP (n=3). \*P<0.05, \*\*P<0.01 versus Ad-EGFP, paired t-test.

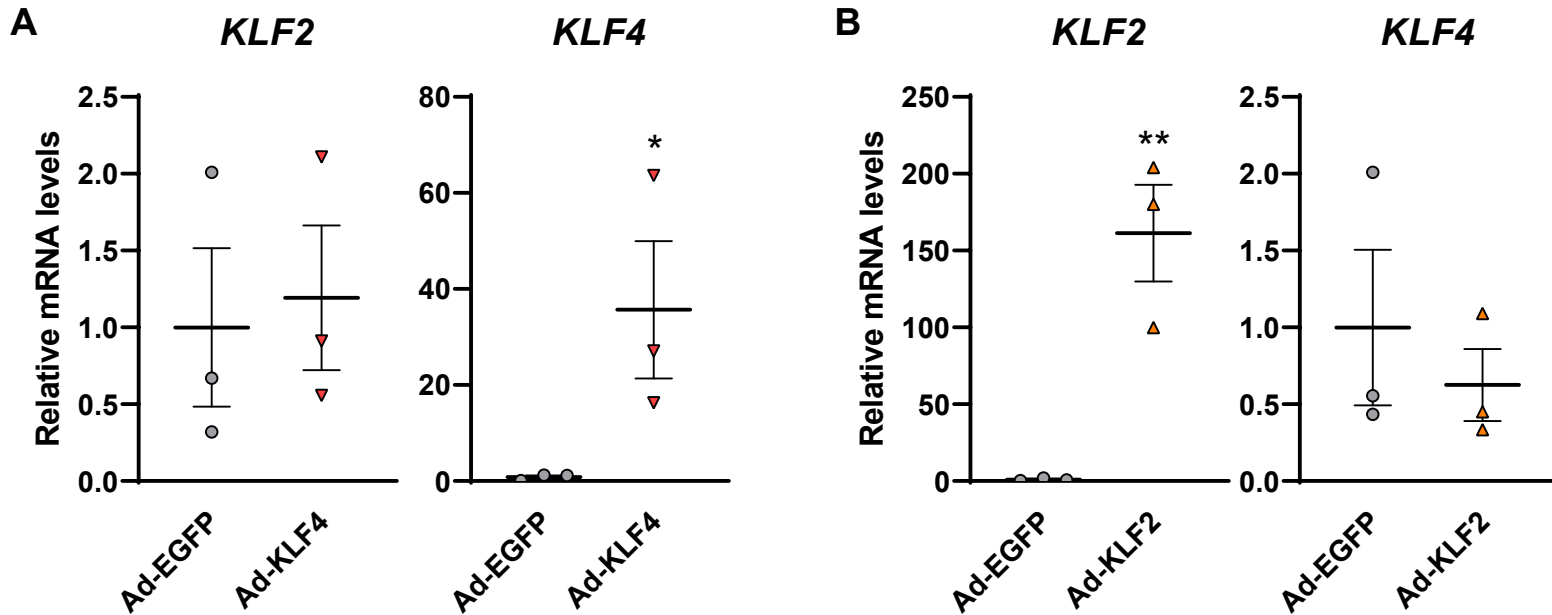

**Supplementary figure 13. Ad-KLF4 and Ad-KLF2 treatment of BMSC pellets.** (A and B) BMSCs were transfected with adenovirus (Ad-KLF4 or Ad-EGFP for (A), and Ad-KLF2 or Ad-EGFP for (B)), and were cultured in pellets. RNA was collected 2 weeks after pellet culture (n=3). mRNA levels are expressed as means  $\pm$  SE, relative to Ad-EGFP. \*P<0.05, \*\*P<0.01 versus Ad-EGFP, paired t-test.

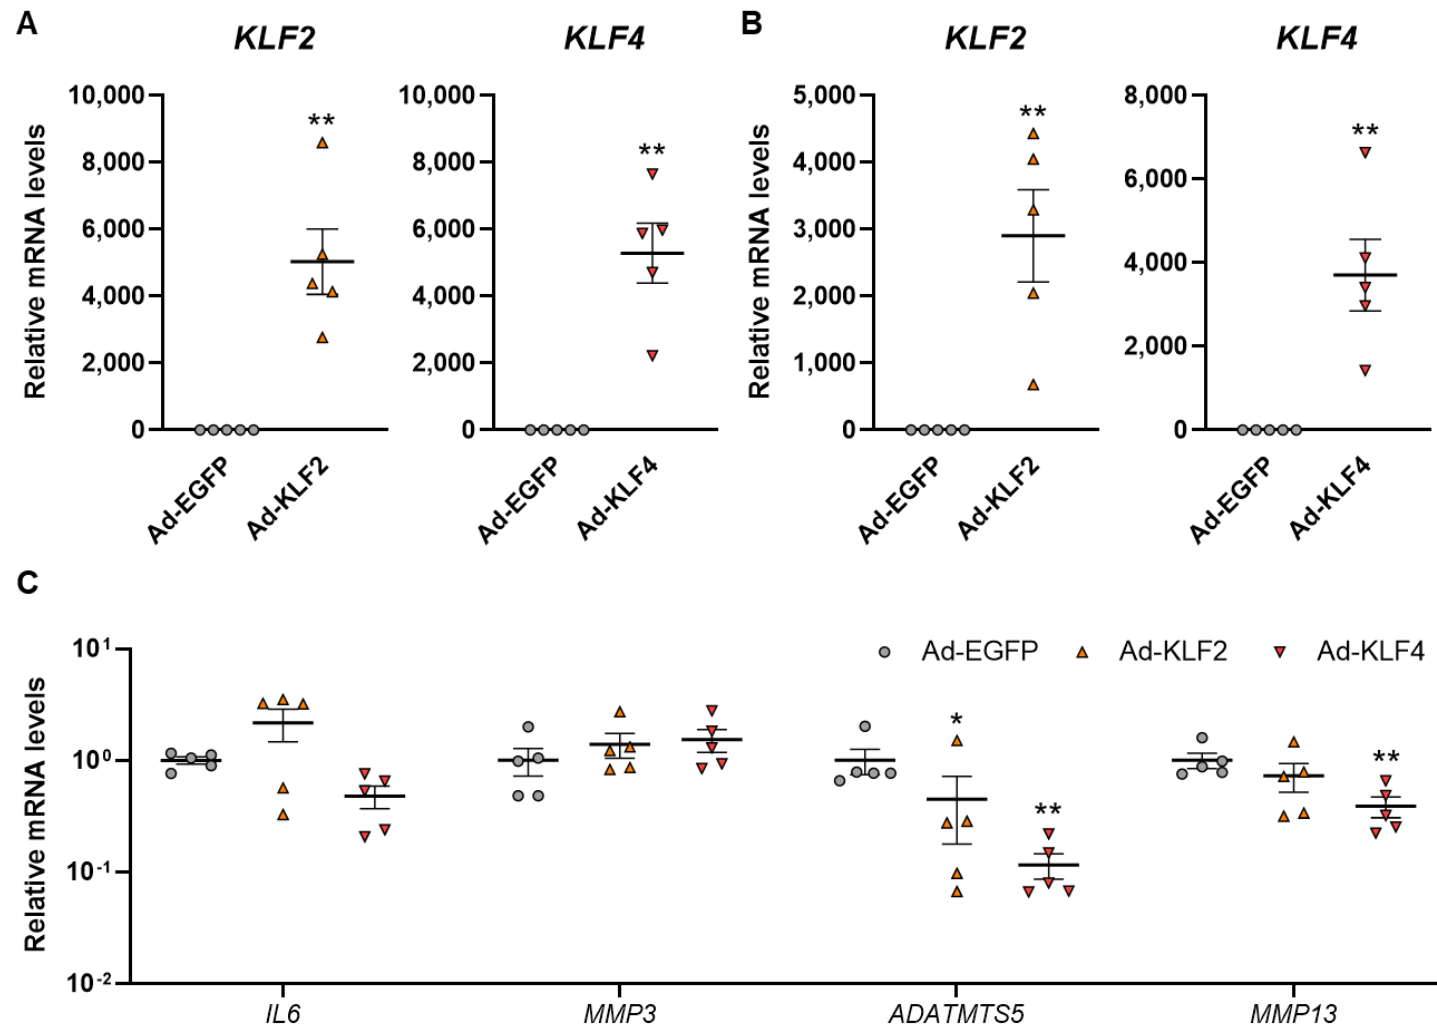

**Supplementary figure 14. Regulation of inflammatory and catabolic genes by KLF4 and KLF2 in human OA chondrocytes.** (A) Related to the experiments with IL-1 $\beta$  stimulation in figure 4A, expression levels of *KLF2* and *KLF4* are shown (n=5). (B and C) Cells were transfected with Ad-EGFP, Ad-KLF2 or Ad-KLF4, and RNA was collected 48 hours after adenoviral transfection without IL-1 $\beta$  stimulation (n=5). mRNA levels are expressed as means  $\pm$  SE, relative to Ad-EGFP. \*P<0.05, \*\*P<0.01 versus Ad-EGFP, paired t-test in (A and B), and Dunnett's test in (C). Results of one-way mixed-effects ANOVA test are shown in supplementary table 2.

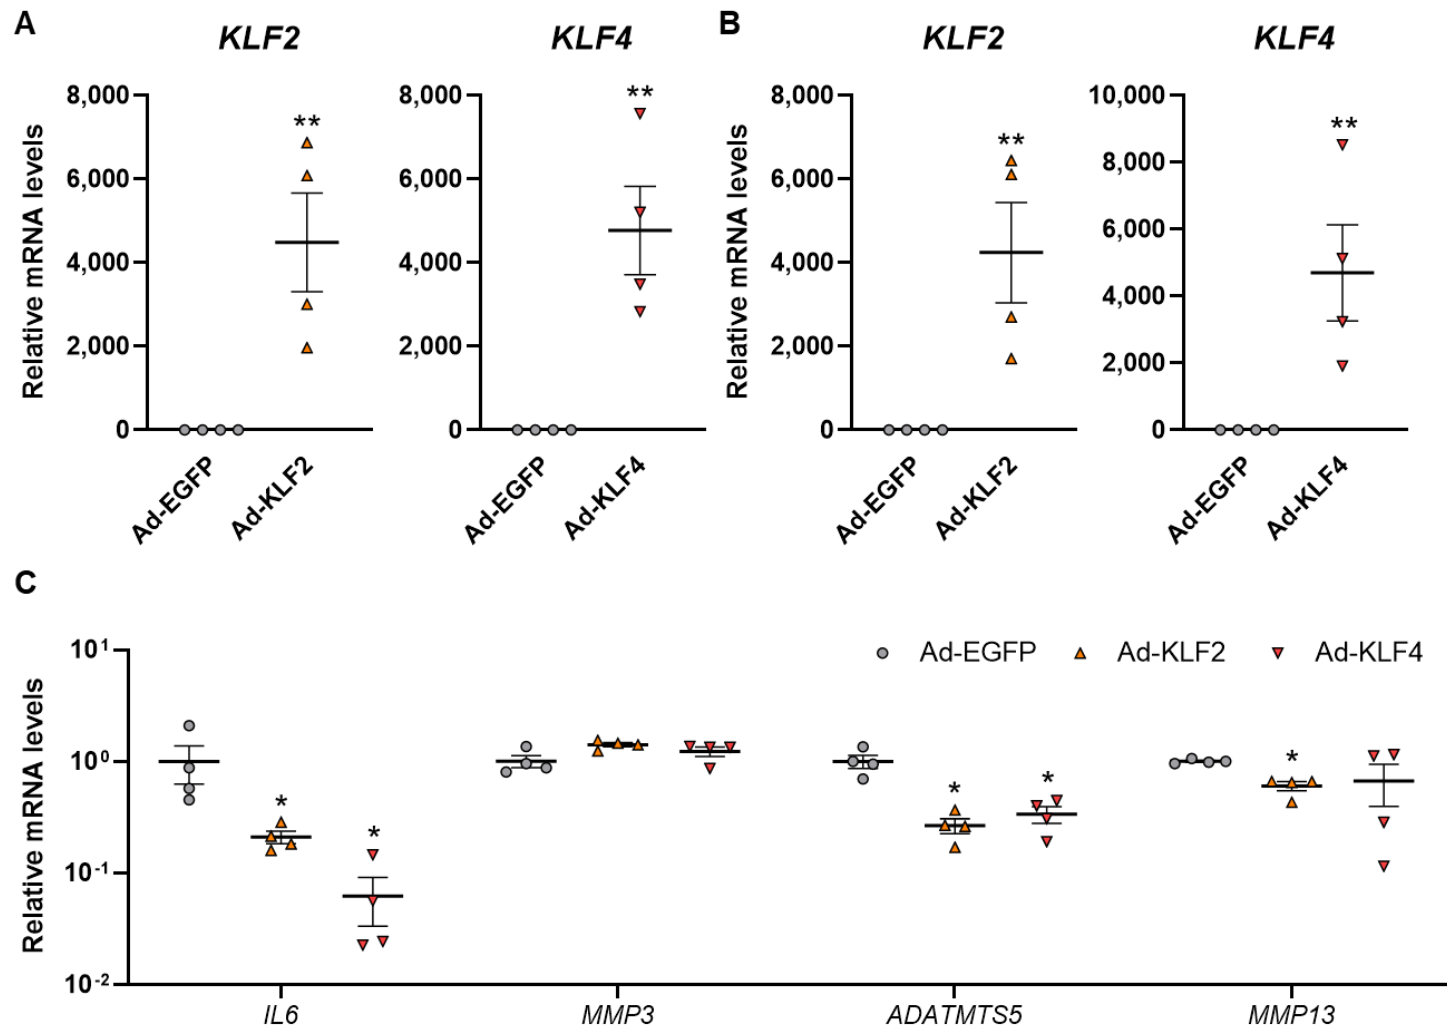

**Supplementary figure 15. Regulation of inflammatory and catabolic genes by KLF4 and KLF2 in human meniscal cells.** (A) Related to the experiments with IL-1 $\beta$  stimulation in figure 4B, expression levels of *KLF2* and *KLF4* are shown (n=4). (B and C) Cells were transfected with Ad-EGFP, Ad-KLF2 or Ad-KLF4, and RNA was collected 48 hours after adenoviral transfection without IL-1 $\beta$  stimulation. mRNA levels are expressed as means  $\pm$  SE, relative to Ad-EGFP (n=4). \*P<0.05, \*\*P<0.01 versus Ad-EGFP, paired t-test in (A and B), and Dunnett's test in (C). Results of one-way mixed-effects ANOVA test are shown in supplementary table 2.

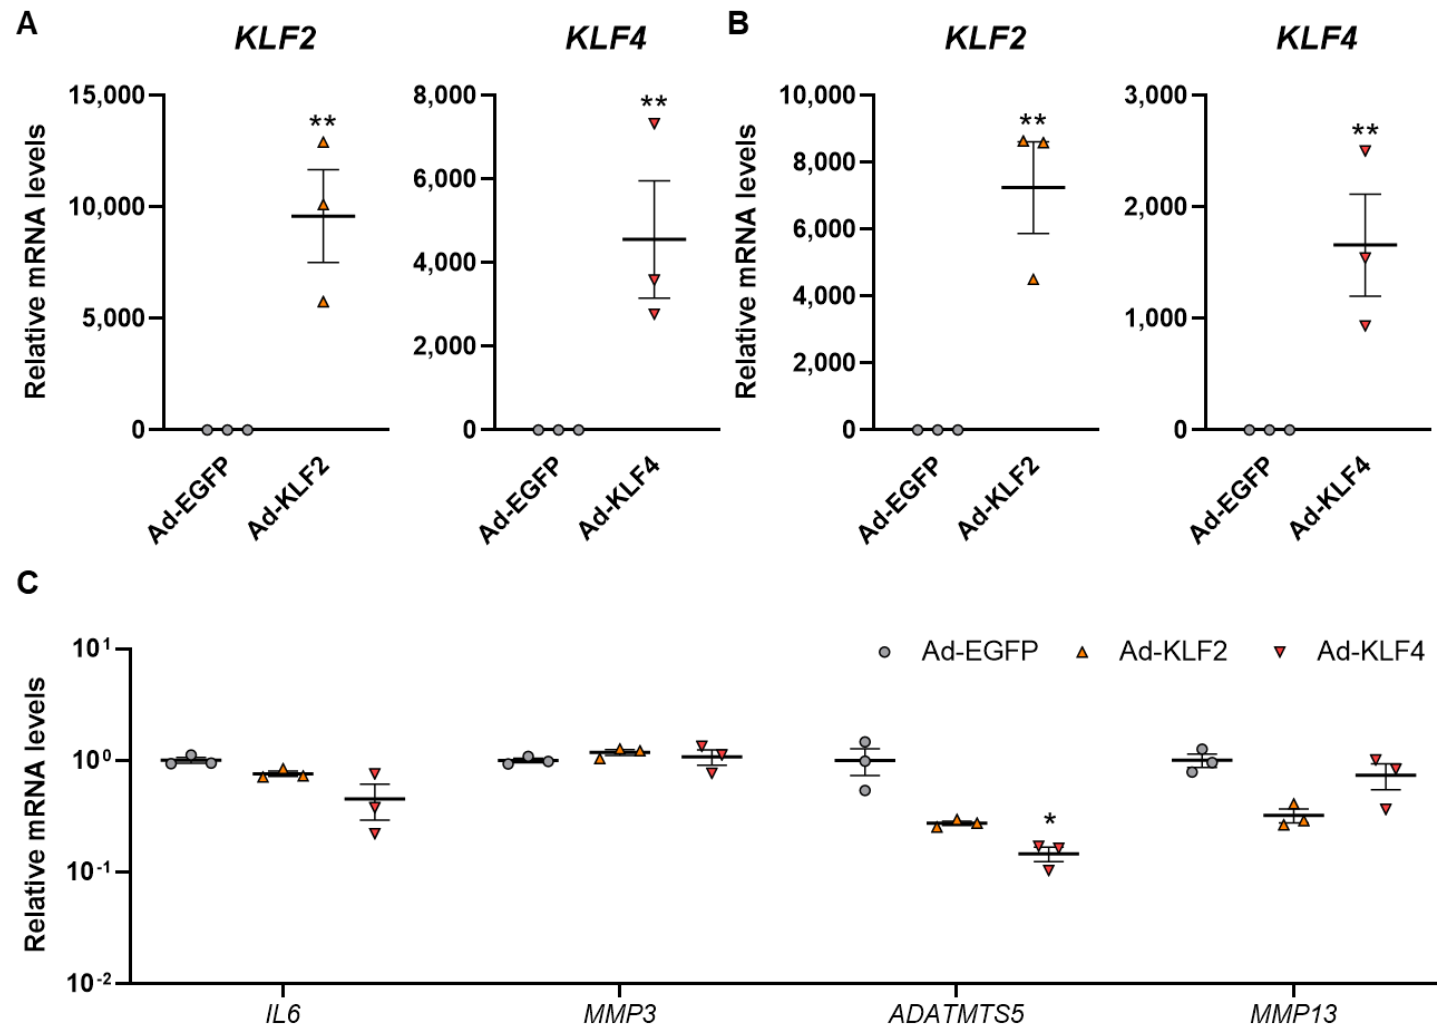

**Supplementary figure 16. Regulation of inflammatory and catabolic genes by KLF4 and KLF2 in human synoviocytes.** (A) Related to the experiments with IL-1 $\beta$  stimulation in figure 4C, expression levels of *KLF2* and *KLF4* are shown (n=3). (B and C) Cells were transfected with Ad-EGFP, Ad-KLF2 or Ad-KLF4, and RNA was collected 48 hours after adenoviral transfection without IL-1 $\beta$  stimulation. mRNA levels are expressed as means  $\pm$  SE, relative to Ad-EGFP (n=3). \*P<0.05, \*\*P<0.01 versus Ad-EGFP, paired t-test in (A and B), and Dunnett's test in (C). Results of one-way mixed-effects ANOVA test are shown in supplementary table 2.

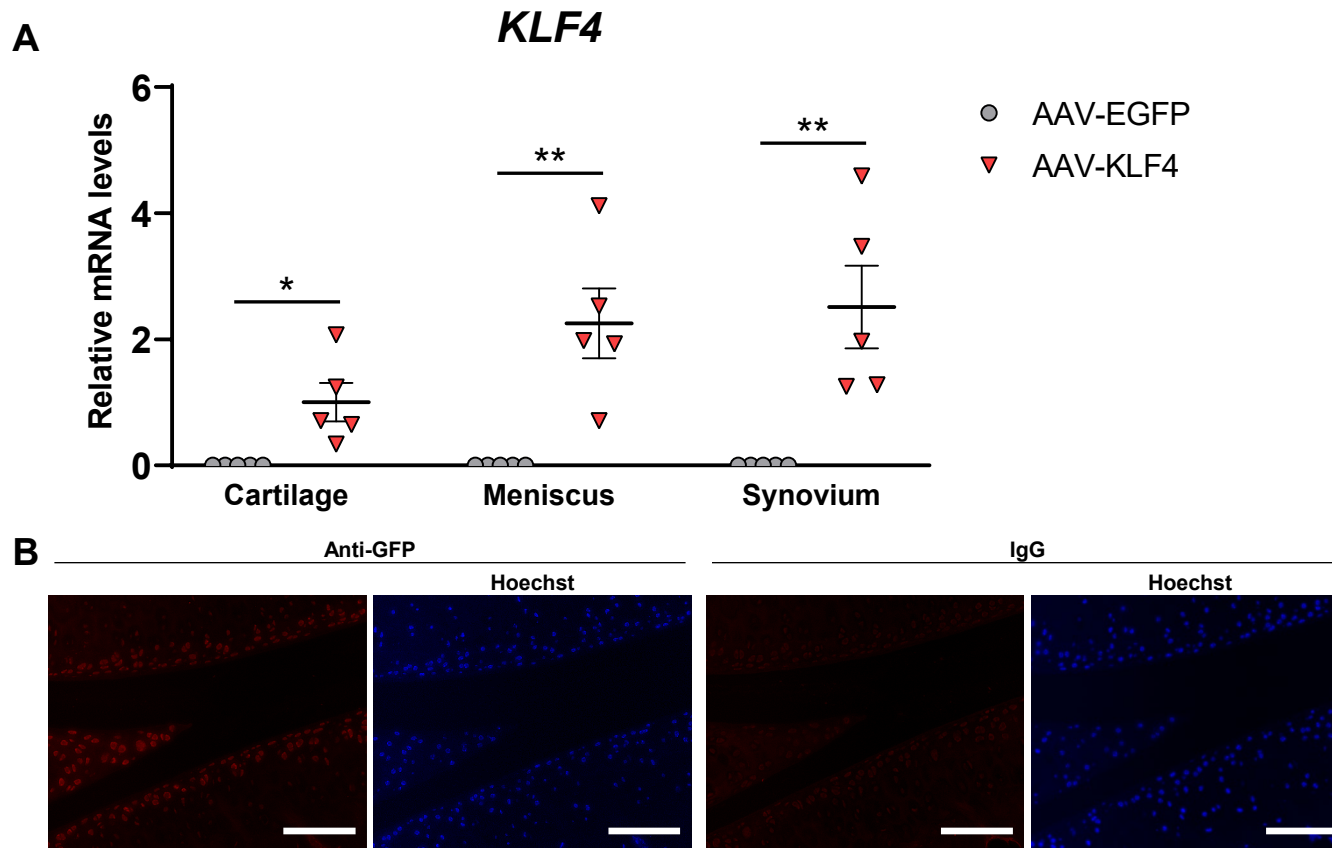

**Supplementary figure 17. Expression levels AAV-KLF4 and AAV-EGFP injection into mouse knee joints.** (A) RNA was collected from cartilage, meniscus and synovium from 12-week-old mouse knee joints one week after AAV-EGFP or -KLF4 injection (n=5 per group), and expression levels of human *KLF4* in each tissue were measured. mRNA levels are relative to AAV-KLF4 injected cartilage. \*adjusted  $P < 0.05$ , \*\*adjusted  $P < 0.01$ , unpaired Welch's t-test with Holm-Sidak's correction. (B) Immunofluorescence of GFP with nuclear staining by Hoechst 33342 in 12-week-old mouse knee joints one week after AAV-EGFP injection. Representative images from n=5 are shown. Scale bars, 100  $\mu\text{m}$ .

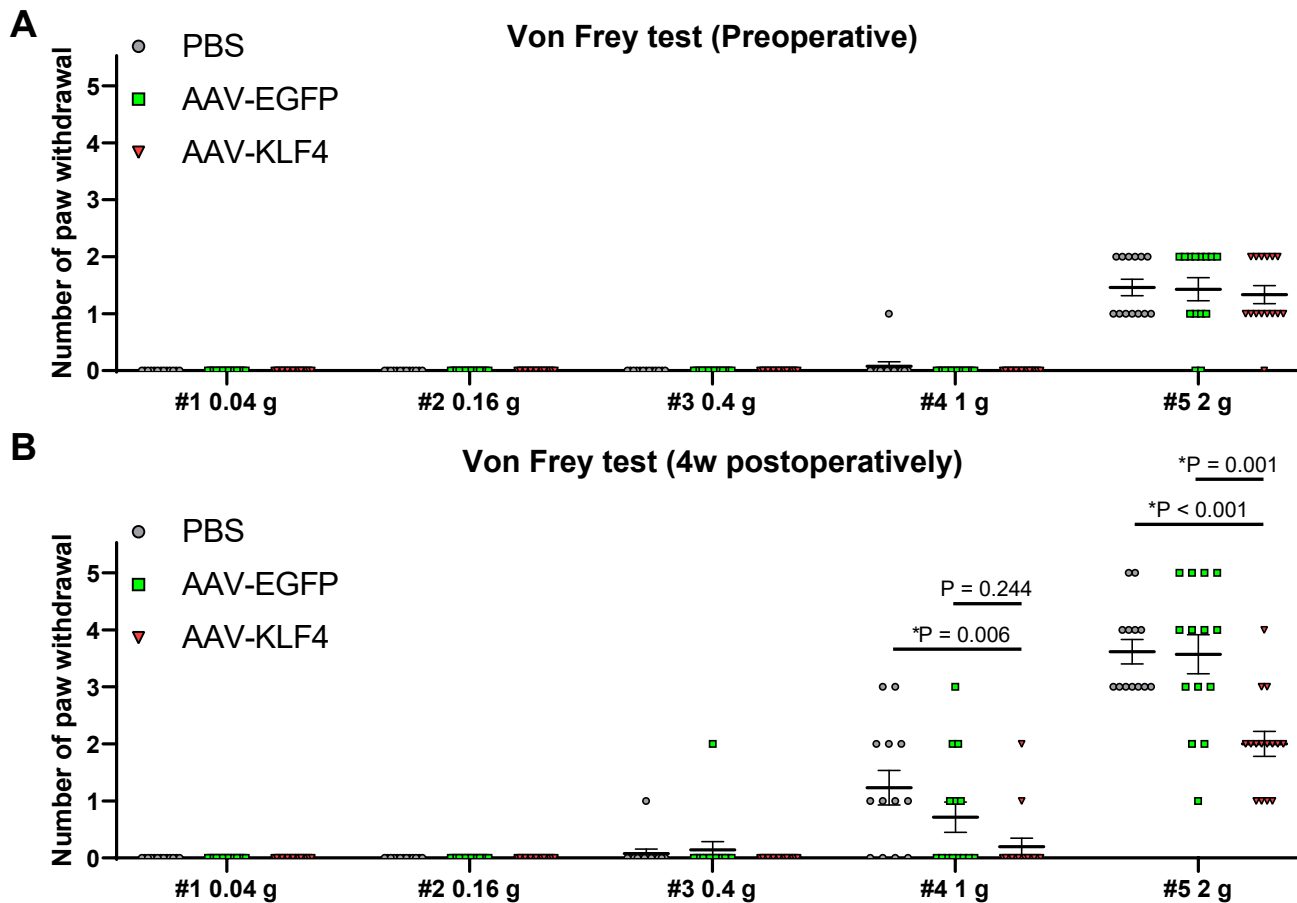

**Supplementary figure 18. Von Frey test in mice with DMM surgery after AAV injection.** (A and B) Related to the experiments in figure 5B, results of von Frey test preoperatively (A) and at 4 weeks postoperatively (B) in mice with DMM surgery are shown. Numbers of paw withdrawal from 5 stimuli per filament per mouse are expressed as means  $\pm$  SE. \*P<0.05 versus AAV-KLF4, Dunn's test. Results of Kruskal-Wallis test are shown in supplementary table 2.



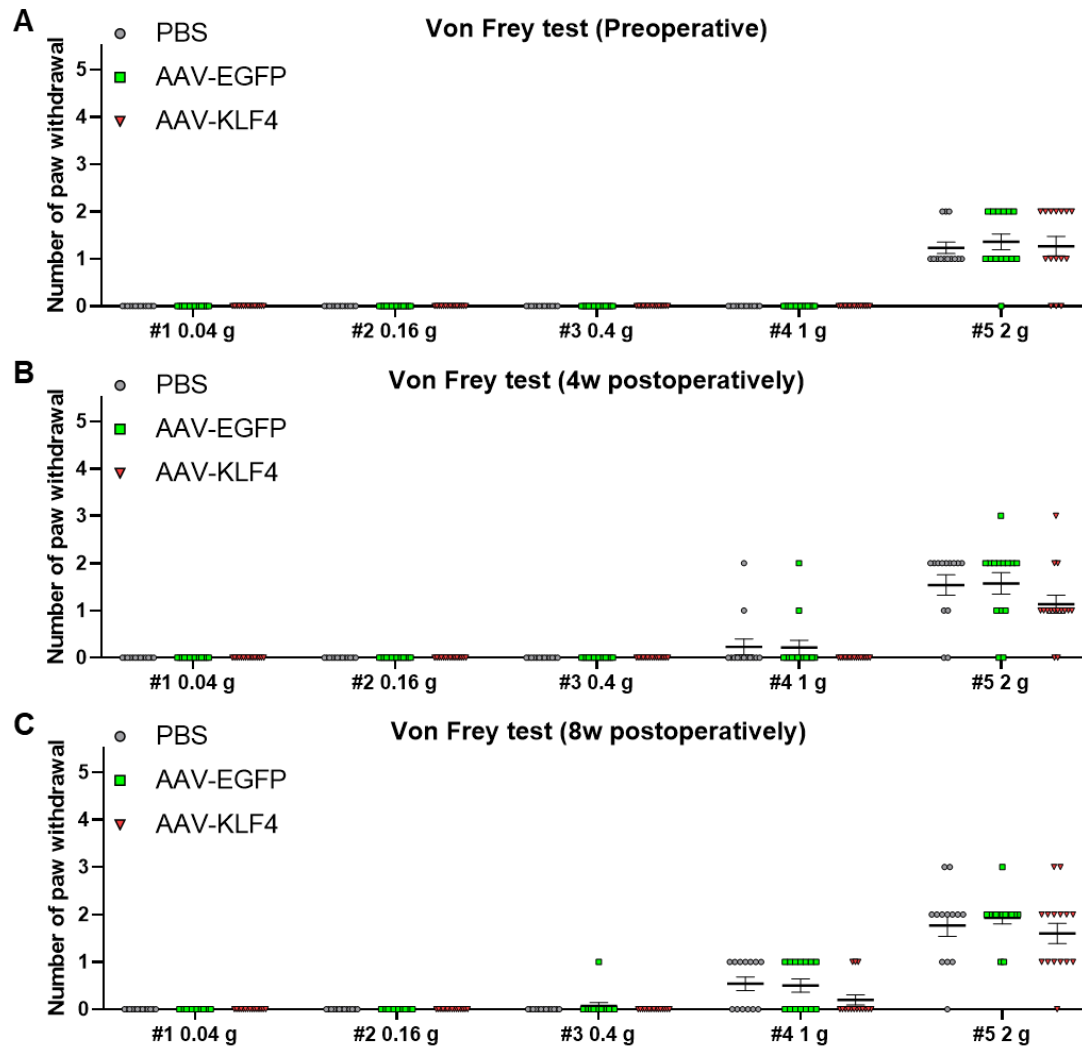

**Supplementary figure 19. Von Frey test in mice with sham surgery after AAV injection.** Related to the experiments in figure 5B, results of von Frey test preoperatively (A), at 4 weeks postoperatively (B), and at 8 weeks postoperatively (C) in mice with sham surgery are shown. Numbers of paw withdrawal from 5 stimuli per filament per mouse are expressed as means  $\pm$  SE. Results of Kruskal-Wallis test are shown in supplementary table 2.

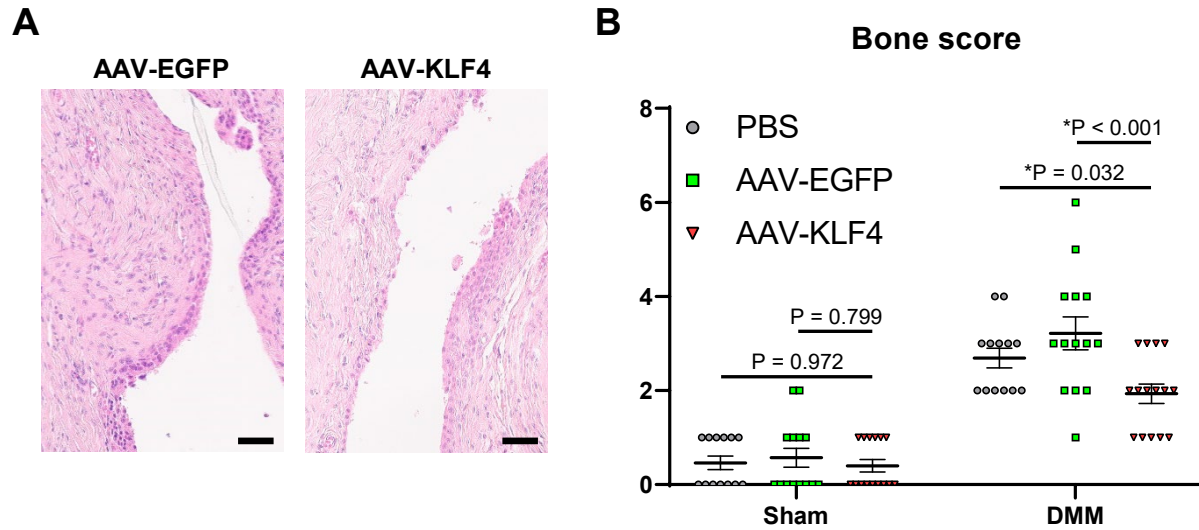

**Supplementary figure 20. Histological evaluation of mice knee samples after AAV injection.** (A) Representative hematoxylin and eosin staining images of the synovium from AAV-EGFP- and AAV-KLF4-injected knee joints with DMM surgery. Scale bars, 50  $\mu$ m. (B) Bone scores.  $*P < 0.05$  versus AAV-KLF4, Dunnett's test. All quantitative data are expressed as means  $\pm$  SE, and results of two-way ANOVA test are shown in supplementary table 2.

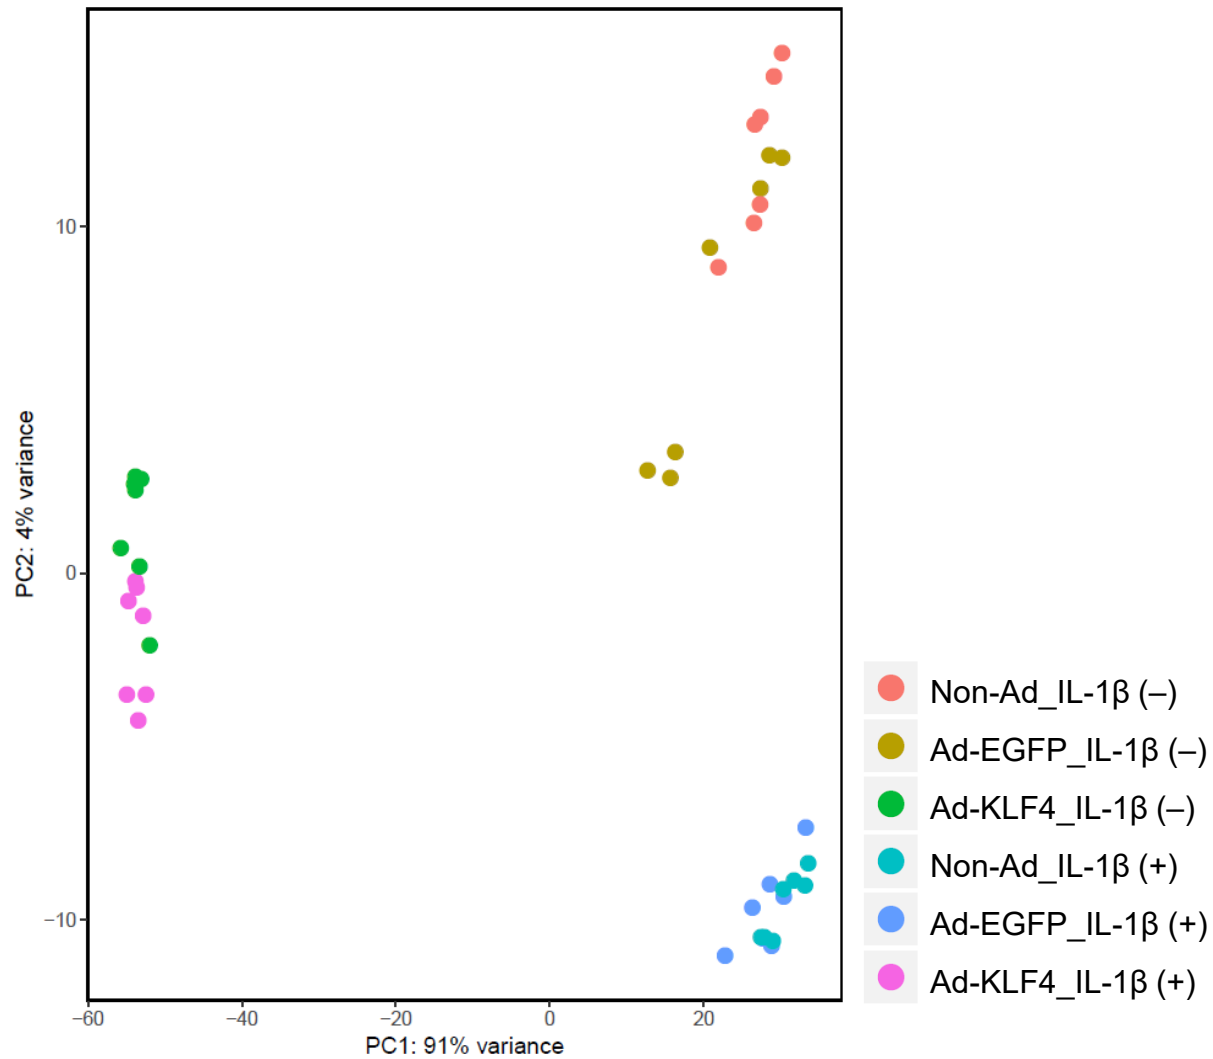

**Supplementary figure 21. Principal component analysis for DRUG-seq data from Ad-KLF4-, Ad-EGFP- and non-transduced (Non-Ad) TC28a2 cells.** In samples with IL-1 $\beta$  stimulation, cells were treated with 10 ng/ml of IL-1 $\beta$  for 6 hours before RNA collection. PC1, the first principal component; PC2, the second principal component.

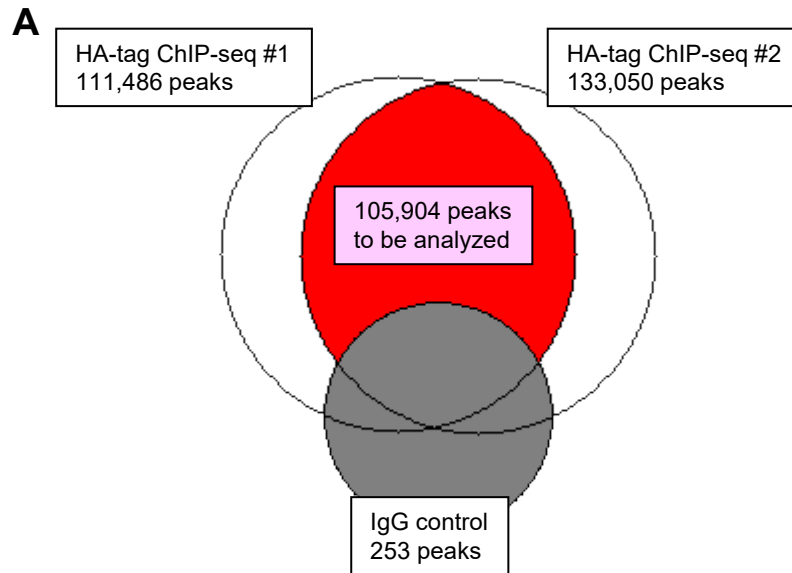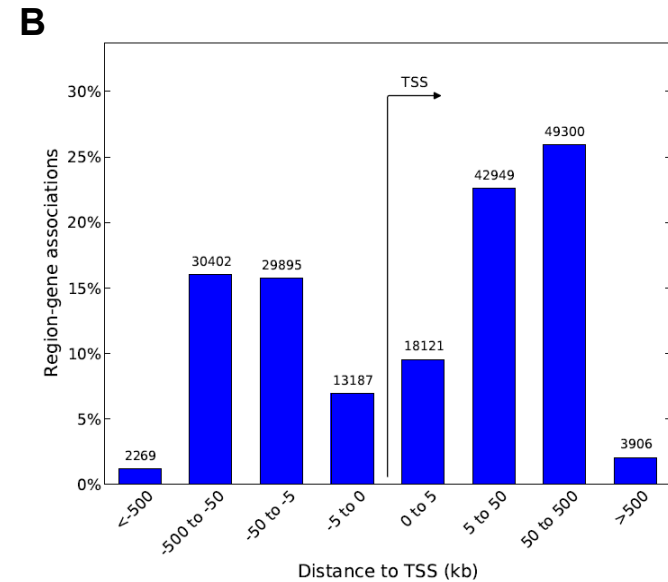

**Supplementary figure 22. Summary of ChIP-seq peaks.** (A) There were 111,486 and 133,050 peaks detected in the two independent replicates of ChIP-seq samples from HA-KLF4 transfected cells. The peaks were intersected between the replicates, and peaks common between ChIP-seq samples and an IgG control sample were excluded from further analyses. (B) Distribution of peaks relative to the transcriptional start sites (TSSs) is shown. The y-axis represents the percentage of peaks in each distance category; peak counts are indicated on each bar.

| Rank | Motif | P-value |        |
|------|-------|---------|--------|
| 1    |       | 1e-652  | KLF    |
| 2    |       | 1e-134  | FRA    |
| 3    |       | 1e-42   | MAZ    |
| 4    |       | 1e-39   | SP     |
| 5    |       | 1e-31   | PABPN1 |
| 6    |       | 1e-29   | ABI3   |
| 7    |       | 1e-27   | THAP1  |
| 8    |       | 1e-26   | ZNF    |
| 9    |       | 1e-23   | CEBP   |
| 10   |       | 1e-22   | TEAD   |
| 11   |       | 1e-22   | ZSCAN  |
| 12   |       | 1e-21   | MAD    |
| 13   |       | 1e-20   | PHD    |
| 14   |       | 1e-20   | SRSF   |
| 15   |       | 1e-19   | TBX    |

| Rank | Motif | P-value |      |
|------|-------|---------|------|
| 16   |       | 1e-19   | HUR  |
| 17   |       | 1e-18   | SPI  |
| 18   |       | 1e-18   | ATF3 |
| 19   |       | 1e-17   | ATF4 |
| 20   |       | 1e-16   | RBM5 |
| 21   |       | 1e-16   | SPL  |
| 22   |       | 1e-16   | GATA |
| 23   |       | 1e-15   | MITF |
| 24   |       | 1e-14   | MZF1 |
| 25   |       | 1e-13   | GFI1 |
| 26   |       | 1e-13   | LIN  |
| 27   |       | 1e-13   | HUR  |
| 28   |       | 1e-12   | AZF  |
| 29   |       | 1e-12   | MYB  |

**Supplementary figure 23. Summary of motifs recovered from ChIP-seq peaks.** The motif logos display nucleotide frequencies (scaled relative to the information content) at each position.

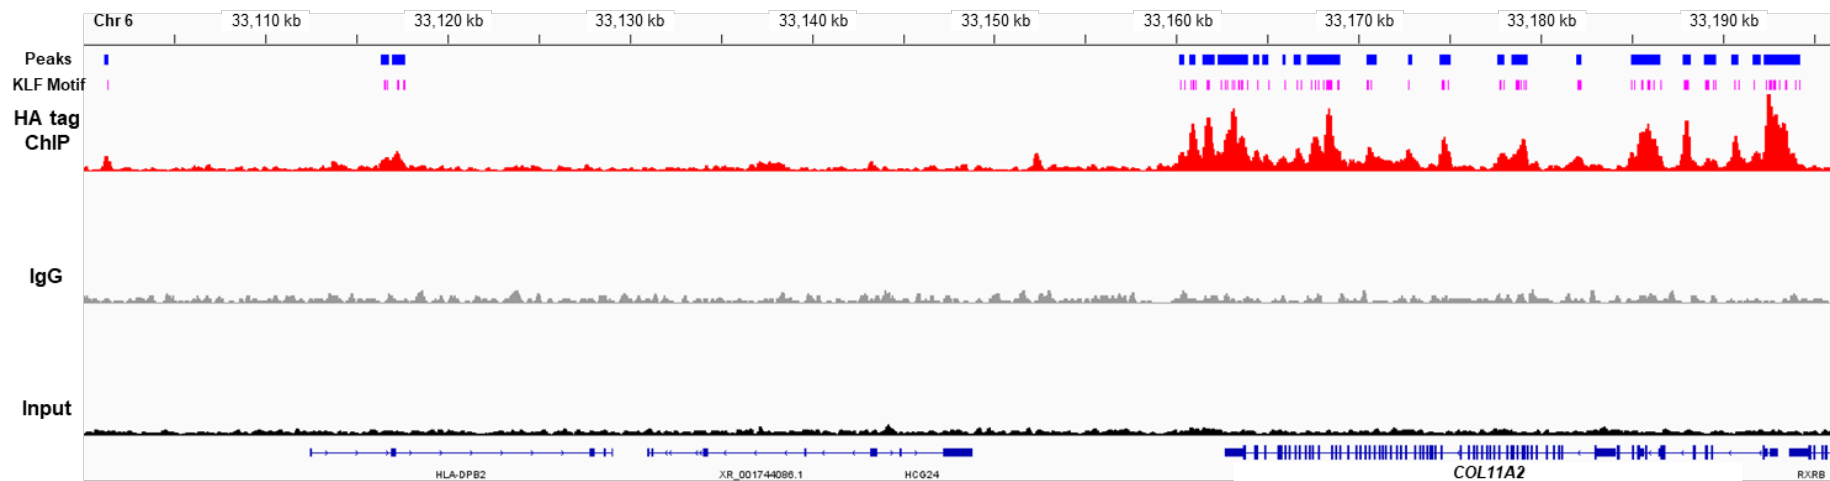

**Supplementary figure 24. Visualization of aligned reads for HA tag ChIP-seq, IgG and input samples around the *COL11A2* gene.** Blue bars indicate peak regions that were putative regulatory domains of *COL11A2* and common between the replicates of ChIP samples. Pink bars show the predicted sites of the recovered KLF motif which were located within the peak regions.

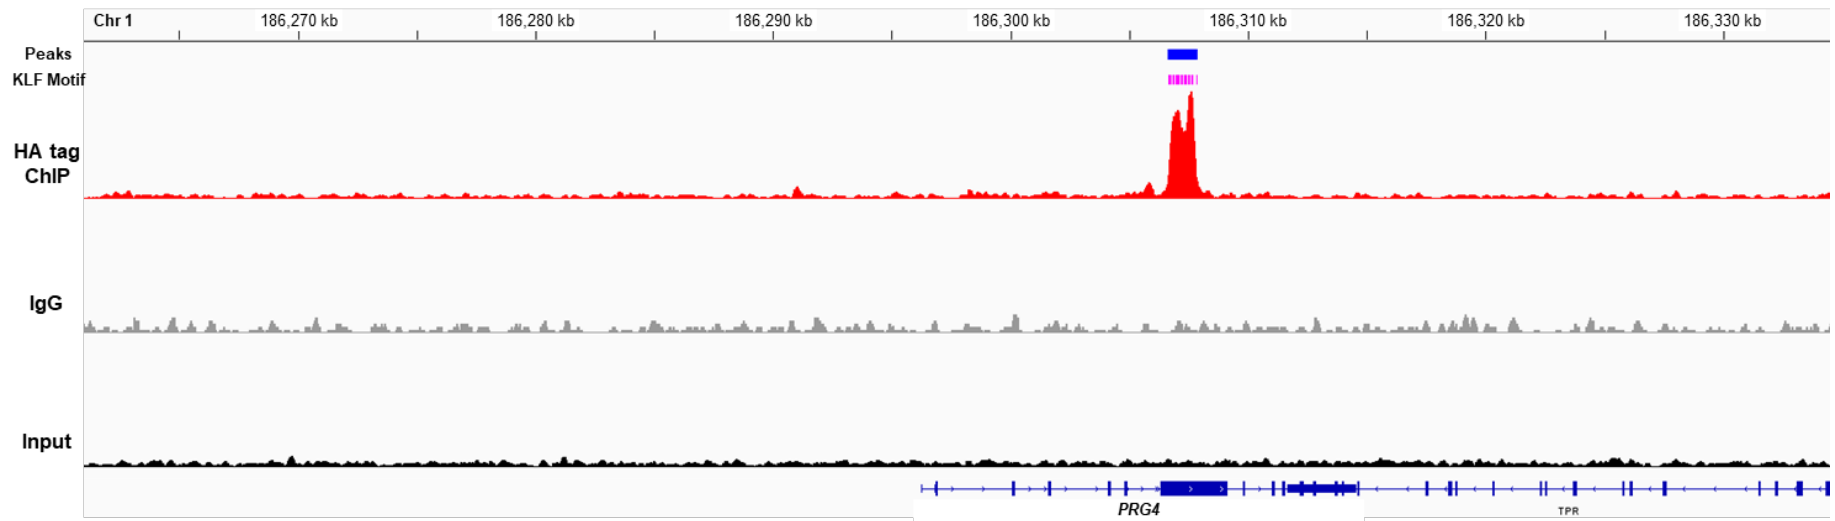

**Supplementary figure 25. Visualization of aligned reads for HA tag ChIP-seq, IgG and input samples around the *PRG4* gene.** A blue bar indicates a peak region that was a putative regulatory domain of *PRG4* and common between the replicates of ChIP samples. Pink bars show the predicted sites of the recovered KLF motif which were located within the peak regions.

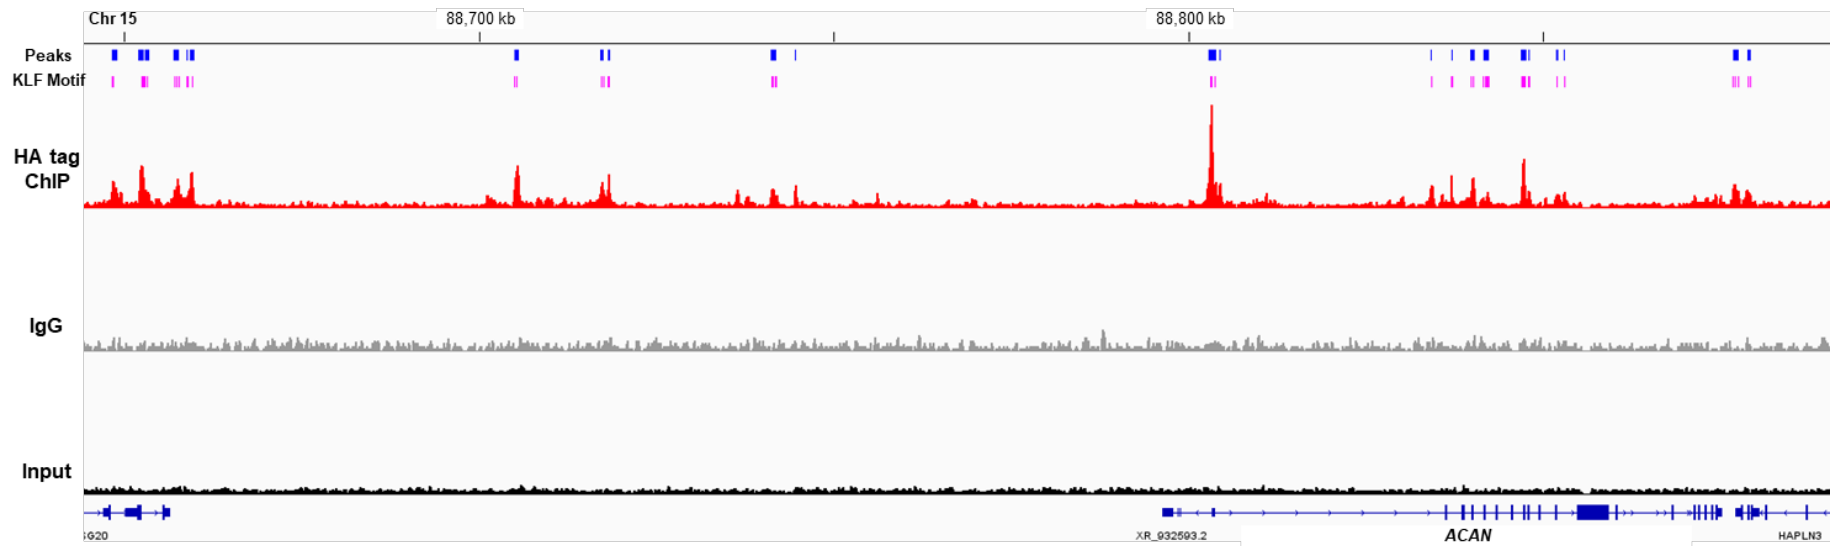

**Supplementary figure 26. Visualization of aligned reads for HA tag ChIP-seq, IgG and input samples around the *ACAN* gene.** Blue bars indicate peak regions that were putative regulatory domains of *ACAN* and common between the replicates of ChIP samples. Pink bars show the predicted sites of the recovered KLF motif which were located within the peak regions.



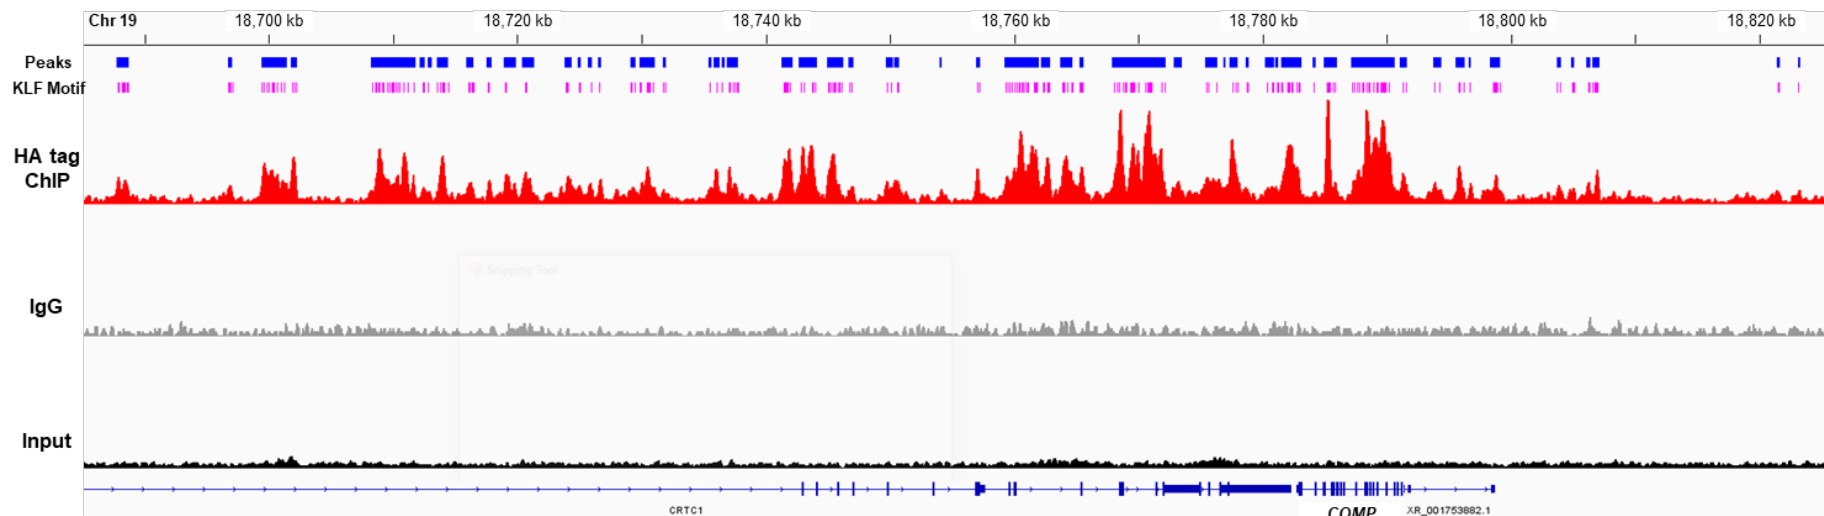

**Supplementary figure 27. Visualization of aligned reads for HA tag ChIP-seq, IgG and input samples around the *COMP* gene.** Blue bars indicate peak regions that were putative regulatory domains of *COMP* and common between the replicates of ChIP samples. Pink bars show the predicted sites of the recovered KLF motif which were located within the peak regions.

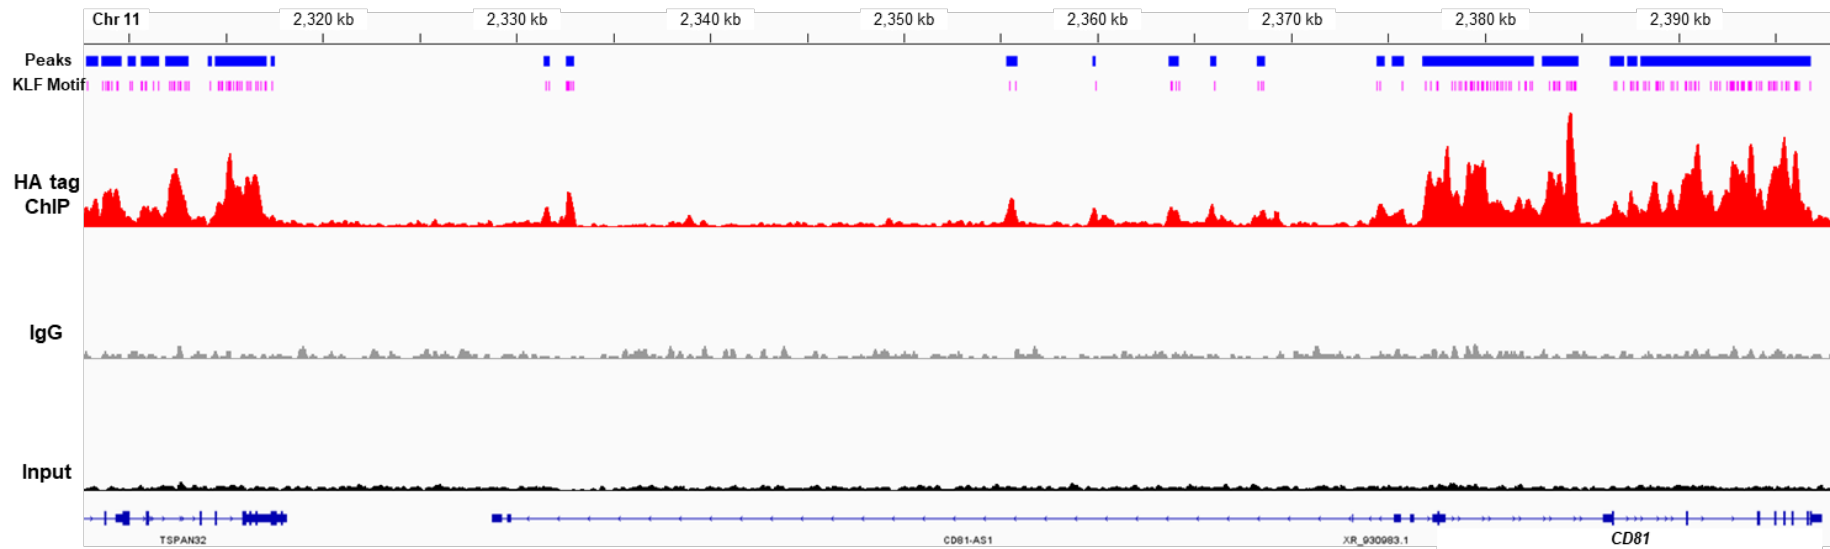

**Supplementary figure 28. Visualization of aligned reads for HA tag ChIP-seq, IgG and input samples around the *CD81* gene.** Blue bars indicate peak regions that were putative regulatory domains of *CD81* and common between the replicates of ChIP samples. Pink bars show the predicted sites of the recovered KLF motif which were located within the peak regions.

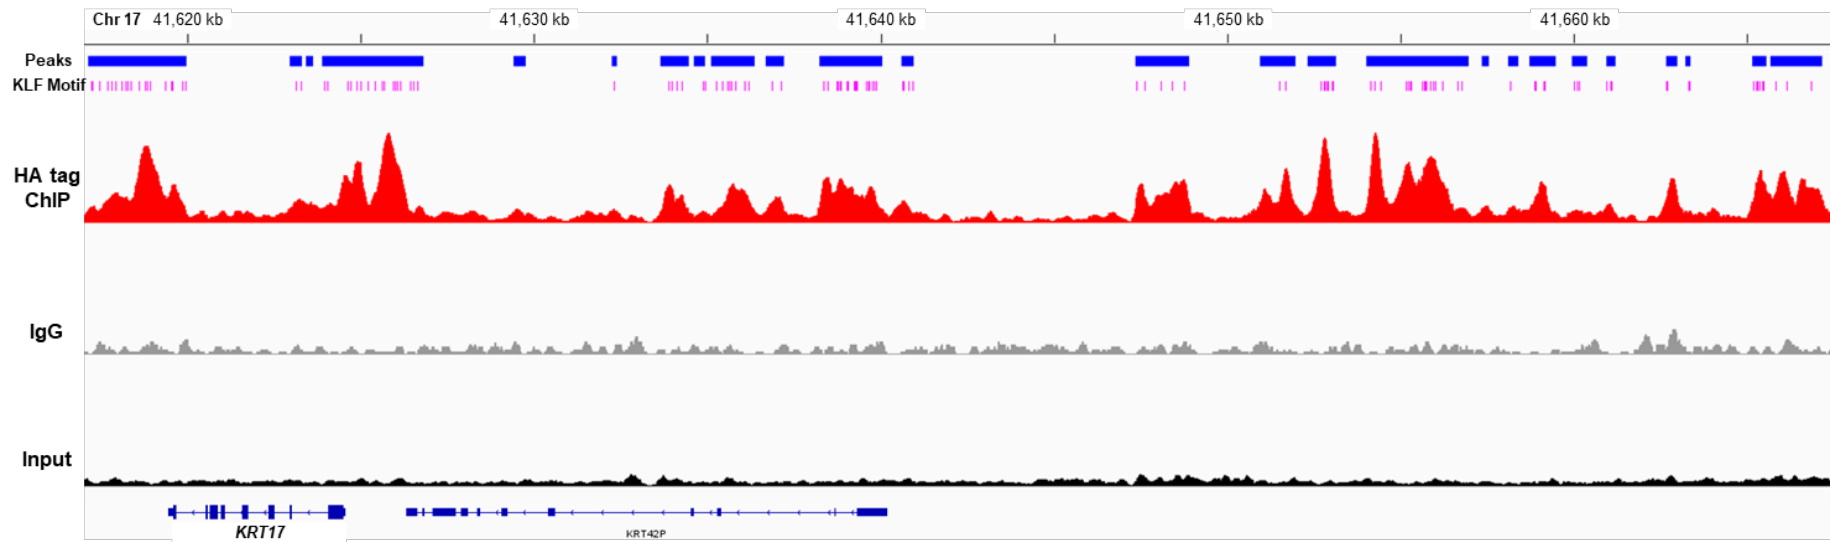

**Supplementary figure 29. Visualization of aligned reads for HA tag ChIP-seq, IgG and input samples around the *KRT17* gene.** Blue bars indicate peak regions that were putative regulatory domains of *KRT17* and common between the replicates of ChIP samples. Pink bars show the predicted sites of the recovered KLF motif which were located within the peak regions.

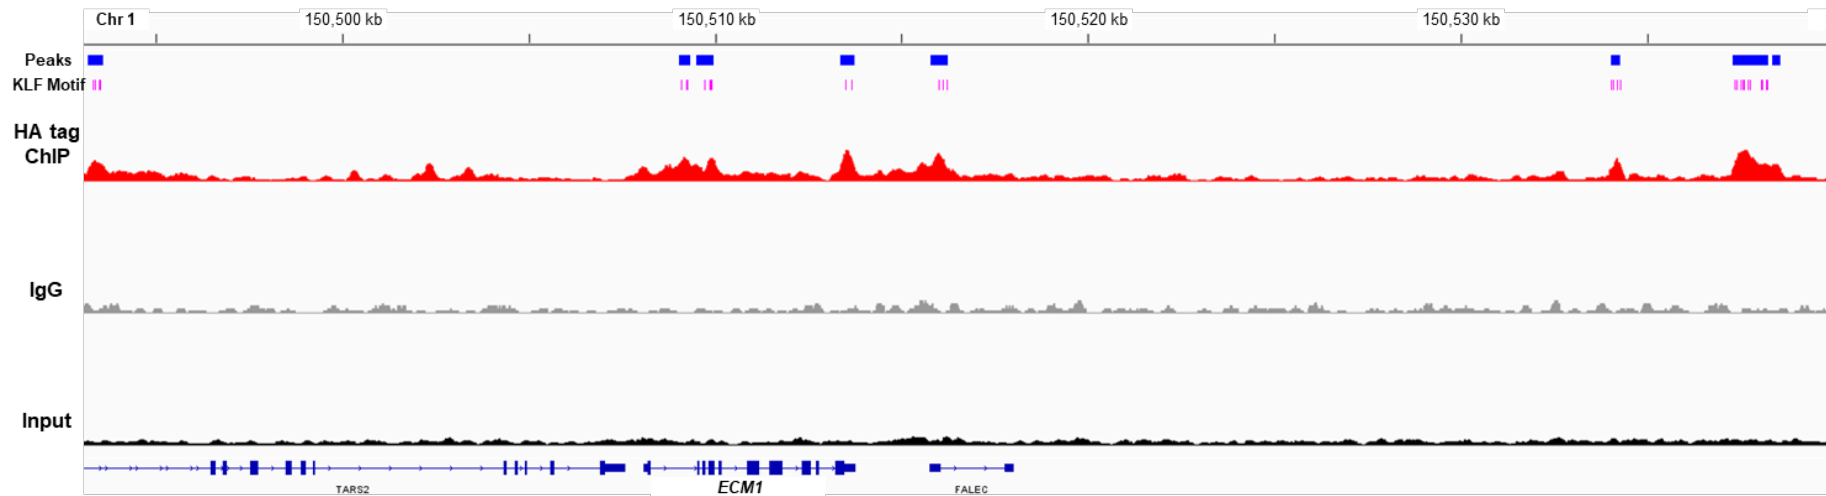

**Supplementary figure 30. Visualization of aligned reads for HA tag ChIP-seq, IgG and input samples around the *ECM1* gene.** Blue bars indicate peak regions that were putative regulatory domains of *ECM1* and common between the replicates of ChIP samples. Pink bars show the predicted sites of the recovered KLF motif which were located within the peak regions.

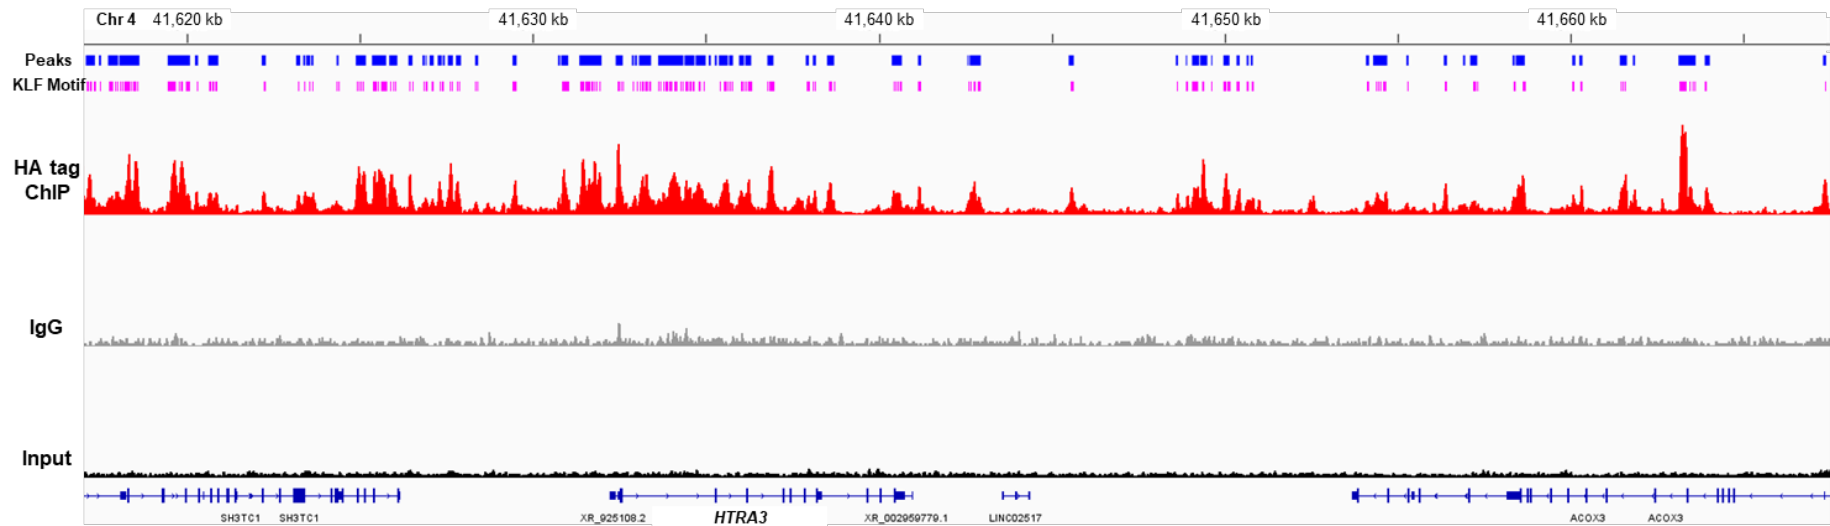

**Supplementary figure 31. Visualization of aligned reads for HA tag ChIP-seq, IgG and input samples around the *HTRA3* gene.** Blue bars indicate peak regions that were putative regulatory domains of *HTRA3* and common between the replicates of ChIP samples. Pink bars show the predicted sites of the recovered KLF motif which were located within the peak regions.

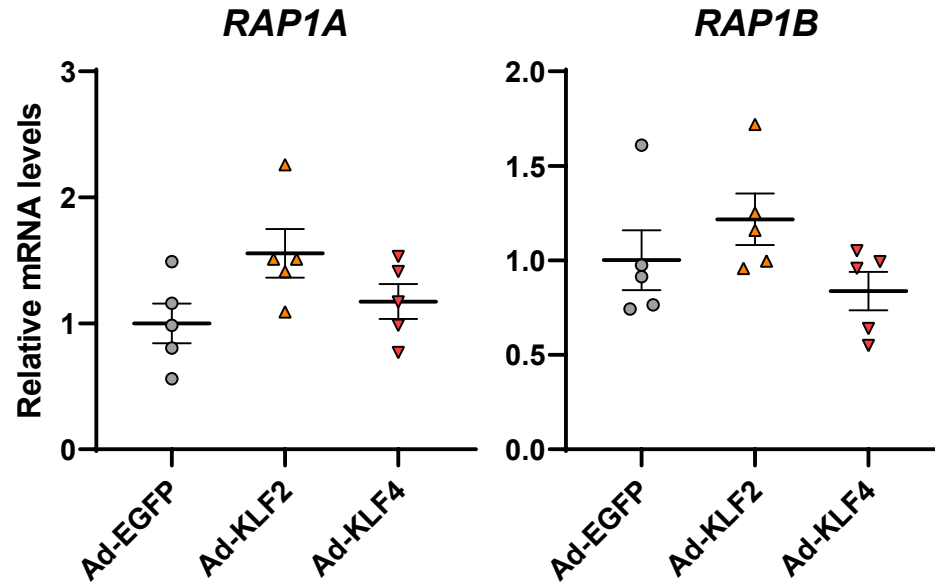

**Supplementary figure 32. Expression levels of *RAP1A* and *RAP1B* in KLF2- and KLF4-transduced human OA chondrocytes.** Cells were transfected with Ad-EGFP, Ad-KLF2 or Ad-KLF4, and RNA was collected 48 hours after transfection (n=5). mRNA levels are expressed as means  $\pm$  SE, relative to Ad-EGFP. Results of one-way mixed-effects ANOVA test are shown in supplementary table 2.

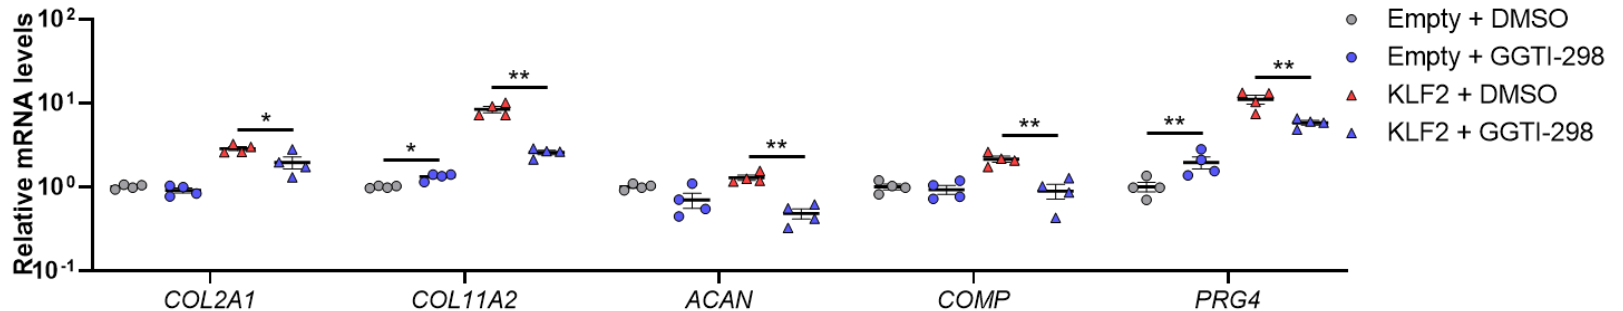

**Supplementary figure 33. KLF2 regulation of chondrogenic genes through RAP1 signaling pathway.** Related to the experiments in figure 8A, TC28a2 cells were transfected with an expression vector encoding KLF2 or an empty vector. Then, cells were treated with GGTI-298 or DMSO. RNA was collected 48 hours after transfection (n=4 from four independent experiments). mRNA levels are expressed as means  $\pm$  SE, relative to empty vector-transfected samples with DMSO as controls. \*P<0.05, \*\*P<0.01, Sidak's multiple comparison test. Results of two-way mixed-effects ANOVA test are shown in supplementary table 2.

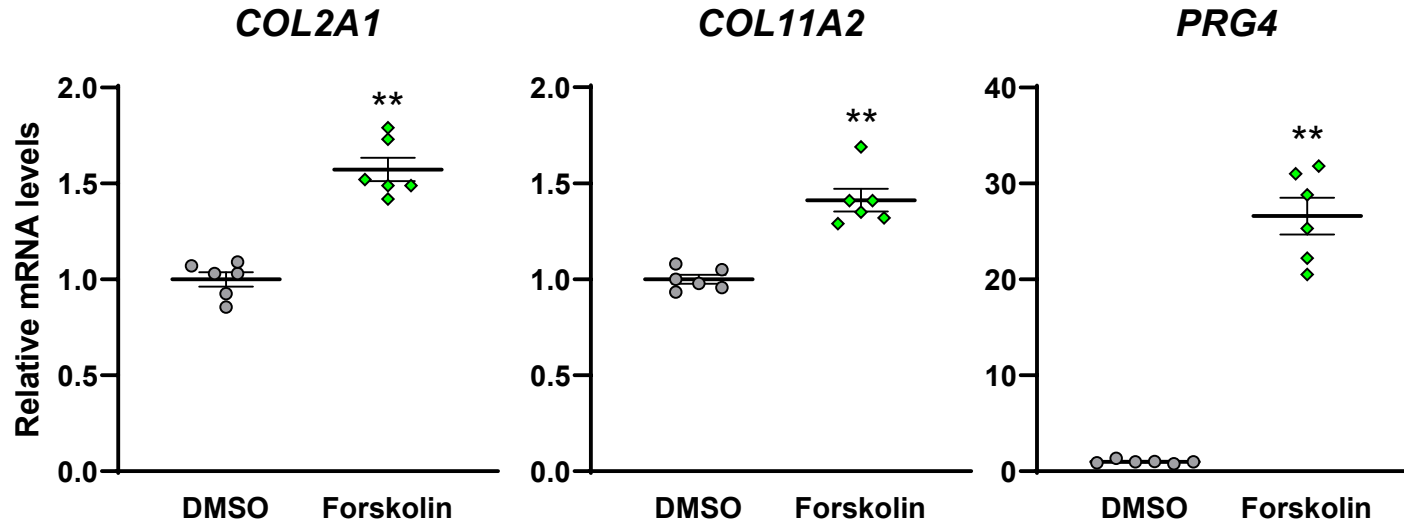

**Supplementary figure 34. Expression levels of cartilage ECM genes in forskolin-treated TC28a2 cells.** Cells were treated with forskolin, and RNA was collected 48 hours after initiation of treatment. mRNA levels are expressed as means  $\pm$  SE, relative to DMSO (n=6 from six independent experiments). \*P<0.05, \*\*P<0.01 versus DMSO, paired t-test.



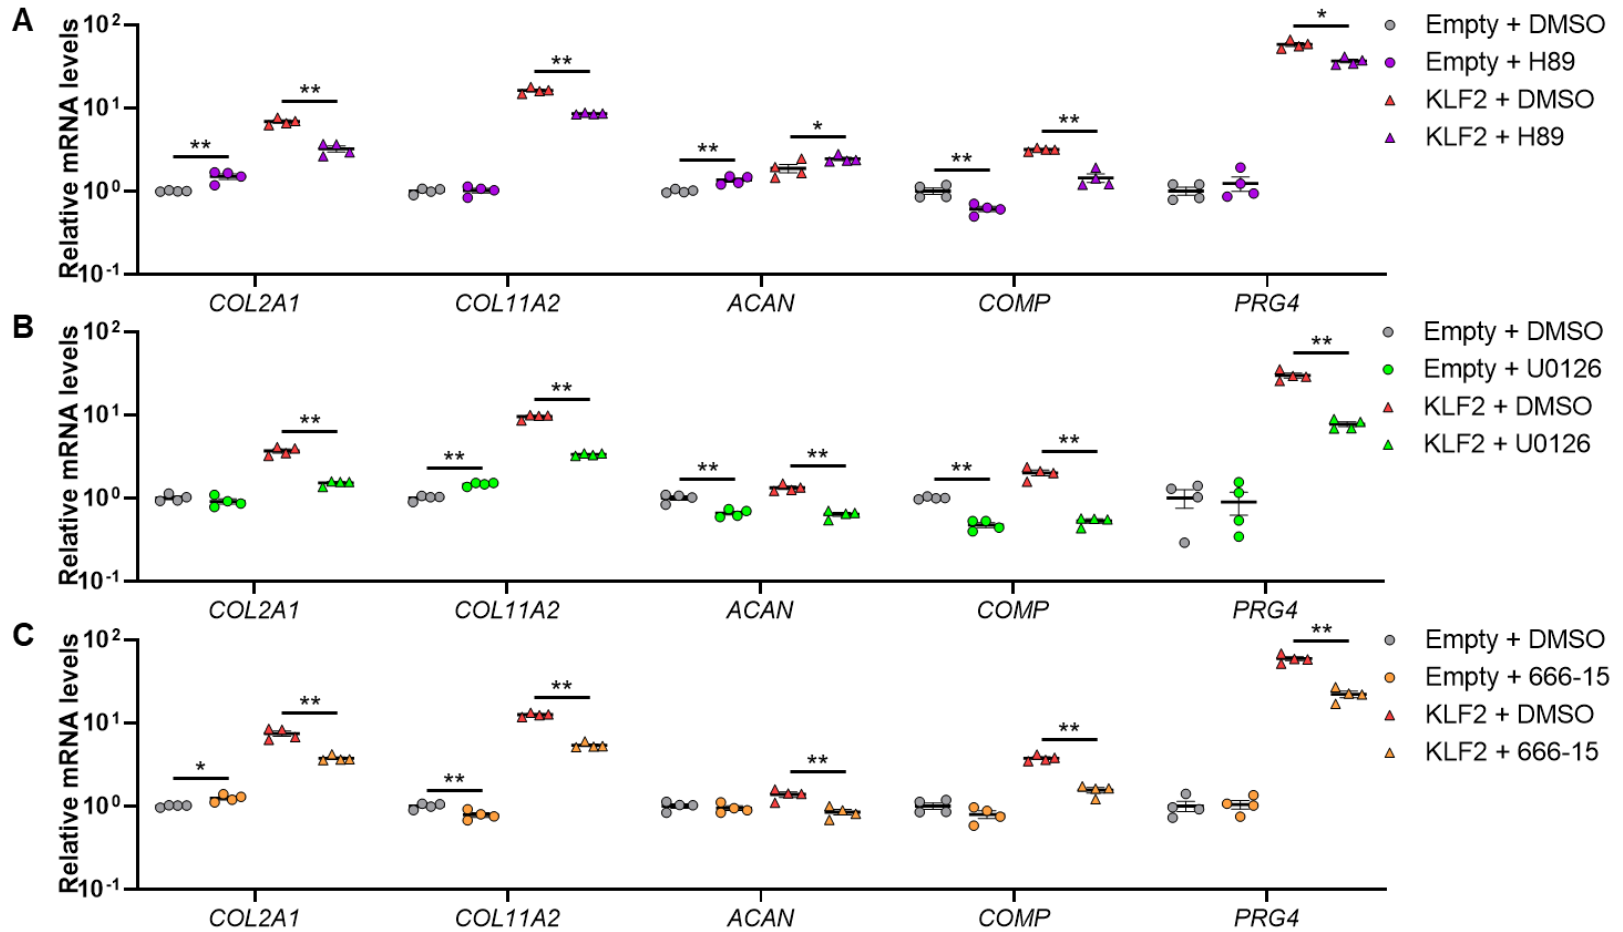

**Supplementary figure 35. KLF2 regulation of chondrogenic genes through RAP1-related signaling axis.** Related to the experiments in figure 8B–8D, TC28a2 cells were transfected with an expression vector encoding KLF2 or an empty vector. Then, cells were treated with H89 (A), U0126 (B) or 666-15 (C), or DMSO. RNA was collected 48 hours after transfection (n=4 from four independent experiments). mRNA levels are expressed as means  $\pm$  SE, relative to empty vector-transfected samples with DMSO as controls. \*P<0.05, \*\*P<0.01, Sidak's multiple comparison test. Results of two-way mixed-effects ANOVA test are shown in supplementary table 2.

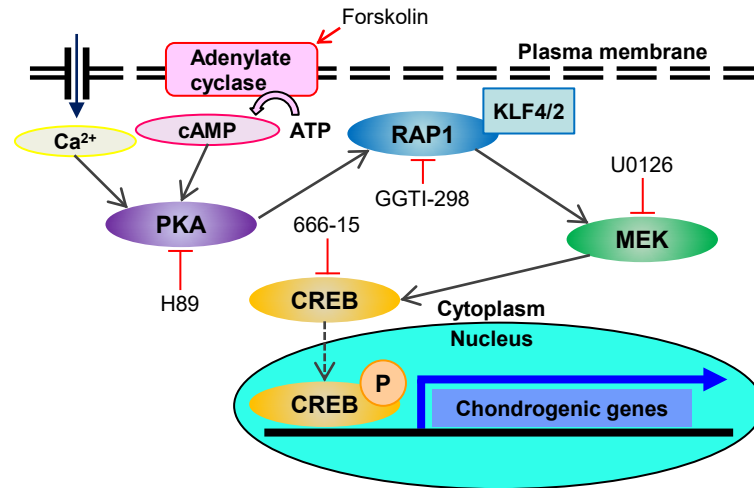

**Supplementary figure 36. A putative model of KLF4 and KLF2 regulation through the PKA (protein kinase A)-RAP1-MEK (mitogen-activated protein kinase kinase)-CREB (cyclic AMP [cAMP] response element-binding protein) signaling axis.**

**Supplementary table 1. Expression of KLF family genes in normal and OA human knee cartilage tissues.**

| Gene         | Log2(CPM) |      | FDR       |
|--------------|-----------|------|-----------|
|              | Normal    | OA   |           |
| <i>KLF2</i>  | 6.15      | 3.90 | 7.17E-07* |
| <i>KLF3</i>  | 5.81      | 6.22 | 4.24E-01  |
| <i>KLF4</i>  | 8.39      | 6.73 | 2.85E-07* |
| <i>KLF5</i>  | 4.75      | 2.95 | 1.12E-06* |
| <i>KLF6</i>  | 7.00      | 7.26 | 1.37E-01  |
| <i>KLF7</i>  | 4.55      | 4.92 | 4.04E-01  |
| <i>KLF8</i>  | 4.21      | 3.83 | 2.40E-01  |
| <i>KLF9</i>  | 8.73      | 6.85 | 3.23E-06* |
| <i>KLF10</i> | 8.06      | 5.74 | 1.59E-11* |
| <i>KLF11</i> | 4.86      | 3.56 | 1.10E-07* |
| <i>KLF12</i> | 5.75      | 5.69 | 8.98E-01  |
| <i>KLF13</i> | 5.89      | 5.78 | 6.60E-01  |
| <i>KLF15</i> | 6.99      | 5.16 | 1.15E-04* |
| <i>KLF16</i> | 2.42      | 3.22 | 1.09E-01  |

*CPM* counts per million reads mapped, *OA* osteoarthritis, *FDR* false discovery rate, \* <0.05

**Supplementary table 2. Results of omnibus tests for multiple comparisons in each figure.**

| Figure    |                 | Test                        |             | P-value |
|-----------|-----------------|-----------------------------|-------------|---------|
| Figure 1A | <i>COL2A1</i>   | One-way mixed-effects ANOVA |             | < 0.001 |
|           | <i>COL11A2</i>  | One-way mixed-effects ANOVA |             | < 0.001 |
|           | <i>PRG4</i>     | One-way mixed-effects ANOVA |             | < 0.001 |
| Figure 1E | <i>Klf4</i>     | Welch's ANOVA               |             | < 0.001 |
|           | <i>Klf2</i>     | Welch's ANOVA               |             | < 0.001 |
| Figure 2D | OARSI score     | Two-way ANOVA               | Surgery     | < 0.001 |
|           |                 |                             | Genotype    | 0.007   |
|           |                 |                             | Interaction | 0.027   |
| Figure 2E | Meniscus score  | Two-way ANOVA               | Surgery     | < 0.001 |
|           |                 |                             | Genotype    | 0.001   |
|           |                 |                             | Interaction | 0.586   |
| Figure 2F | Synovitis score | Two-way ANOVA               | Surgery     | < 0.001 |
|           |                 |                             | Genotype    | 0.011   |
|           |                 |                             | Interaction | 0.011   |
| Figure 4A | <i>IL6</i>      | One-way mixed-effects ANOVA |             | < 0.001 |
|           | <i>MMP3</i>     | One-way mixed-effects ANOVA |             | < 0.001 |
|           | <i>NOS2</i>     | One-way mixed-effects ANOVA |             | < 0.001 |
|           | <i>PTGS2</i>    | One-way mixed-effects ANOVA |             | 0.015   |
|           | <i>ADAMTS5</i>  | One-way mixed-effects ANOVA |             | 0.002   |
|           | <i>MMP13</i>    | One-way mixed-effects ANOVA |             | < 0.001 |
| Figure 4B | <i>IL6</i>      | One-way mixed-effects ANOVA |             | 0.002   |
|           | <i>MMP3</i>     | One-way mixed-effects ANOVA |             | 0.001   |
|           | <i>NOS2</i>     | One-way mixed-effects ANOVA |             | 0.059   |
|           | <i>PTGS2</i>    | One-way mixed-effects ANOVA |             | < 0.001 |
|           | <i>ADAMTS5</i>  | One-way mixed-effects ANOVA |             | < 0.001 |
|           | <i>MMP13</i>    | One-way mixed-effects ANOVA |             | 0.009   |
| Figure 4C | <i>IL6</i>      | One-way mixed-effects ANOVA |             | 0.004   |
|           | <i>MMP3</i>     | One-way mixed-effects ANOVA |             | 0.003   |
|           | <i>PTGS2</i>    | One-way mixed-effects ANOVA |             | < 0.001 |
|           | <i>ADAMTS5</i>  | One-way mixed-effects ANOVA |             | 0.009   |
|           | <i>MMP13</i>    | One-way mixed-effects ANOVA |             | 0.008   |
| Figure 5C | #2 0.16 g       | Kruskal-Wallis              |             | 0.102   |
|           | #3 0.4 g        | Kruskal-Wallis              |             | 0.005   |
|           | #4 1 g          | Kruskal-Wallis              |             | < 0.001 |
|           | #5 2 g          | Kruskal-Wallis              |             | < 0.001 |
| Figure 5E | OARSI score     | Two-way ANOVA               | Surgery     | < 0.001 |
|           |                 |                             | Treatment   | 0.005   |
|           |                 |                             | Interaction | 0.001   |

|           |                 |                             |                     |         |
|-----------|-----------------|-----------------------------|---------------------|---------|
| Figure 5F | Meniscus score  | Two-way ANOVA               | Surgery             | < 0.001 |
|           |                 |                             | Treatment           | < 0.001 |
|           |                 |                             | Interaction         | < 0.001 |
| Figure 5G | Synovitis score | Two-way ANOVA               | Surgery             | < 0.001 |
|           |                 |                             | Treatment           | 0.008   |
|           |                 |                             | Interaction         | 0.017   |
| Figure 8A | COL2A1          | Two-way mixed-effects ANOVA | Vector              | < 0.001 |
|           |                 | Two-way mixed-effects ANOVA | Inhibitor treatment | 0.002   |
|           |                 | Two-way mixed-effects ANOVA | Interaction         | < 0.001 |
|           | COL11A2         | Two-way mixed-effects ANOVA | Vector              | < 0.001 |
|           |                 | Two-way mixed-effects ANOVA | Inhibitor treatment | < 0.001 |
|           |                 | Two-way mixed-effects ANOVA | Interaction         | < 0.001 |
|           | ACAN            | Two-way mixed-effects ANOVA | Vector              | 0.250   |
|           |                 | Two-way mixed-effects ANOVA | Inhibitor treatment | < 0.001 |
|           |                 | Two-way mixed-effects ANOVA | Interaction         | 0.012   |
|           | COMP            | Two-way mixed-effects ANOVA | Vector              | < 0.001 |
|           |                 | Two-way mixed-effects ANOVA | Inhibitor treatment | < 0.001 |
|           |                 | Two-way mixed-effects ANOVA | Interaction         | < 0.001 |
|           | PRG4            | Two-way mixed-effects ANOVA | Vector              | < 0.001 |
|           |                 | Two-way mixed-effects ANOVA | Inhibitor treatment | 0.068   |
|           |                 | Two-way mixed-effects ANOVA | Interaction         | < 0.001 |
| Figure 8B | COL2A1          | Two-way mixed-effects ANOVA | Vector              | < 0.001 |
|           |                 | Two-way mixed-effects ANOVA | Inhibitor treatment | 0.002   |
|           |                 | Two-way mixed-effects ANOVA | Interaction         | < 0.001 |
|           | COL11A2         | Two-way mixed-effects ANOVA | Vector              | < 0.001 |
|           |                 | Two-way mixed-effects ANOVA | Inhibitor treatment | < 0.001 |
|           |                 | Two-way mixed-effects ANOVA | Interaction         | < 0.001 |
|           | ACAN            | Two-way mixed-effects ANOVA | Vector              | < 0.001 |
|           |                 | Two-way mixed-effects ANOVA | Inhibitor treatment | 0.014   |
|           |                 | Two-way mixed-effects ANOVA | Interaction         | 0.054   |
|           | COMP            | Two-way mixed-effects ANOVA | Vector              | < 0.001 |
|           |                 | Two-way mixed-effects ANOVA | Inhibitor treatment | < 0.001 |
|           |                 | Two-way mixed-effects ANOVA | Interaction         | 0.005   |
|           | PRG4            | Two-way mixed-effects ANOVA | Vector              | < 0.001 |
|           |                 | Two-way mixed-effects ANOVA | Inhibitor treatment | 0.006   |
|           |                 | Two-way mixed-effects ANOVA | Interaction         | < 0.001 |
| Figure 8C | COL2A1          | Two-way mixed-effects ANOVA | Vector              | < 0.001 |
|           |                 | Two-way mixed-effects ANOVA | Inhibitor treatment | < 0.001 |
|           |                 | Two-way mixed-effects ANOVA | Interaction         | < 0.001 |
|           |                 | Two-way mixed-effects ANOVA | Vector              | < 0.001 |

|                             |                         |                             |                             |             |         |
|-----------------------------|-------------------------|-----------------------------|-----------------------------|-------------|---------|
|                             | COL11A2                 | Two-way mixed-effects ANOVA | Inhibitor treatment         | < 0.001     |         |
|                             |                         | Two-way mixed-effects ANOVA | Interaction                 | < 0.001     |         |
|                             | ACAN                    | Two-way mixed-effects ANOVA | Vector                      | 0.490       |         |
|                             |                         | Two-way mixed-effects ANOVA | Inhibitor treatment         | < 0.001     |         |
|                             | COMP                    | Two-way mixed-effects ANOVA | Interaction                 | < 0.001     |         |
|                             |                         | Two-way mixed-effects ANOVA | Vector                      | < 0.001     |         |
|                             |                         | Two-way mixed-effects ANOVA | Inhibitor treatment         | < 0.001     |         |
|                             | PRG4                    | Two-way mixed-effects ANOVA | Interaction                 | < 0.001     |         |
|                             |                         | Two-way mixed-effects ANOVA | Vector                      | < 0.001     |         |
|                             |                         | Two-way mixed-effects ANOVA | Inhibitor treatment         | 0.011       |         |
|                             | Figure 8D               | COL2A1                      | Two-way mixed-effects ANOVA | Interaction | 0.912   |
|                             |                         |                             | Two-way mixed-effects ANOVA | Vector      | < 0.001 |
| Two-way mixed-effects ANOVA |                         |                             | Inhibitor treatment         | < 0.001     |         |
| COL11A2                     |                         | Two-way mixed-effects ANOVA | Interaction                 | < 0.001     |         |
|                             |                         | Two-way mixed-effects ANOVA | Vector                      | < 0.001     |         |
|                             |                         | Two-way mixed-effects ANOVA | Inhibitor treatment         | < 0.001     |         |
| ACAN                        |                         | Two-way mixed-effects ANOVA | Interaction                 | 0.002       |         |
|                             |                         | Two-way mixed-effects ANOVA | Vector                      | < 0.001     |         |
|                             |                         | Two-way mixed-effects ANOVA | Inhibitor treatment         | < 0.001     |         |
| COMP                        |                         | Two-way mixed-effects ANOVA | Interaction                 | 0.004       |         |
|                             |                         | Two-way mixed-effects ANOVA | Vector                      | < 0.001     |         |
|                             |                         | Two-way mixed-effects ANOVA | Inhibitor treatment         | < 0.001     |         |
| PRG4                        |                         | Two-way mixed-effects ANOVA | Interaction                 | < 0.001     |         |
|                             |                         | Two-way mixed-effects ANOVA | Vector                      | < 0.001     |         |
|                             |                         | Two-way mixed-effects ANOVA | Inhibitor treatment         | 0.015       |         |
| Supplementary figure 3      |                         | KLF4                        | Welch's ANOVA               | Interaction | 0.009   |
|                             |                         | KLF2                        | Welch's ANOVA               | Vector      | < 0.001 |
| Supplementary figure 8      |                         | KLF2                        | One-way mixed-effects ANOVA | Interaction | < 0.001 |
|                             | KLF4                    | One-way mixed-effects ANOVA | Interaction                 | < 0.001     |         |
|                             | COL2A1                  | One-way mixed-effects ANOVA | Interaction                 | < 0.001     |         |
|                             | COL11A2                 | One-way mixed-effects ANOVA | Interaction                 | 0.008       |         |
|                             | PRG4                    | One-way mixed-effects ANOVA | Interaction                 | < 0.001     |         |
|                             | SOX9                    | One-way mixed-effects ANOVA | Interaction                 | < 0.001     |         |
|                             | IL6                     | One-way mixed-effects ANOVA | Interaction                 | < 0.001     |         |
|                             | MMP3                    | One-way mixed-effects ANOVA | Interaction                 | 0.018       |         |
|                             | PTGS2                   | One-way mixed-effects ANOVA | Interaction                 | < 0.001     |         |
|                             | ADAMTS5                 | One-way mixed-effects ANOVA | Interaction                 | < 0.001     |         |
|                             | MMP13                   | One-way mixed-effects ANOVA | Interaction                 | < 0.001     |         |
|                             | Supplementary figure 9B |                             |                             | Surgery     | < 0.001 |

|                          | Bone score     | Two-way ANOVA               | Genotype            | 0.022   |
|--------------------------|----------------|-----------------------------|---------------------|---------|
|                          |                |                             | Interaction         | 0.177   |
| Supplementary figure 14C | <i>IL6</i>     | One-way mixed-effects ANOVA |                     | 0.092   |
|                          | <i>MMP3</i>    | One-way mixed-effects ANOVA |                     | 0.267   |
|                          | <i>ADAMTS5</i> | One-way mixed-effects ANOVA |                     | 0.007   |
|                          | <i>MMP13</i>   | One-way mixed-effects ANOVA |                     | 0.018   |
| Supplementary figure 15C | <i>IL6</i>     | One-way mixed-effects ANOVA |                     | 0.004   |
|                          | <i>MMP3</i>    | One-way mixed-effects ANOVA |                     | 0.040   |
|                          | <i>ADAMTS5</i> | One-way mixed-effects ANOVA |                     | 0.005   |
|                          | <i>MMP13</i>   | One-way mixed-effects ANOVA |                     | 0.288   |
| Supplementary figure 16C | <i>IL6</i>     | One-way mixed-effects ANOVA |                     | 0.133   |
|                          | <i>MMP3</i>    | One-way mixed-effects ANOVA |                     | 0.344   |
|                          | <i>ADAMTS5</i> | One-way mixed-effects ANOVA |                     | 0.016   |
|                          | <i>MMP13</i>   | One-way mixed-effects ANOVA |                     | 0.068   |
| Supplementary figure 18A | #4 1 g         | Kruskal-Wallis              |                     | 0.328   |
|                          | #5 2 g         | Kruskal-Wallis              |                     | 0.812   |
| Supplementary figure 18B | #3 0.4 g       | Kruskal-Wallis              |                     | 0.566   |
|                          | #4 1 g         | Kruskal-Wallis              |                     | 0.012   |
|                          | #5 2 g         | Kruskal-Wallis              |                     | < 0.001 |
| Supplementary figure 19A | #5 2 g         | Kruskal-Wallis              |                     | 0.794   |
| Supplementary figure 19B | #4 1 g         | Kruskal-Wallis              |                     | 0.301   |
|                          | #5 2 g         | Kruskal-Wallis              |                     | 0.125   |
| Supplementary figure 19C | #3 0.4 g       | Kruskal-Wallis              |                     | 0.368   |
|                          | #4 1 g         | Kruskal-Wallis              |                     | 0.135   |
|                          | #5 2 g         | Kruskal-Wallis              |                     | 0.436   |
| Supplementary figure 20B | Bone score     | Two-way ANOVA               | Surgery             | < 0.001 |
|                          |                |                             | Treatment           | 0.005   |
|                          |                |                             | Interaction         | 0.038   |
| Supplementary figure 32  | <i>RAP1A</i>   | One-way mixed-effects ANOVA |                     | 0.102   |
|                          | <i>RAP1B</i>   | One-way mixed-effects ANOVA |                     | 0.056   |
| Supplementary figure 33  | <i>COL2A1</i>  | Two-way mixed-effects ANOVA | Vector              | < 0.001 |
|                          |                | Two-way mixed-effects ANOVA | Inhibitor treatment | 0.016   |
|                          |                | Two-way mixed-effects ANOVA | Interaction         | 0.097   |
|                          | <i>COL11A2</i> | Two-way mixed-effects ANOVA | Vector              | < 0.001 |
|                          |                | Two-way mixed-effects ANOVA | Inhibitor treatment | < 0.001 |
|                          |                | Two-way mixed-effects ANOVA | Interaction         | < 0.001 |
|                          | <i>ACAN</i>    | Two-way mixed-effects ANOVA | Vector              | 0.732   |
|                          |                | Two-way mixed-effects ANOVA | Inhibitor treatment | < 0.001 |
|                          |                | Two-way mixed-effects ANOVA | Interaction         | 0.039   |
|                          |                | Two-way mixed-effects ANOVA | Vector              | 0.071   |

|                          |                          |                             |                             |                     |         |
|--------------------------|--------------------------|-----------------------------|-----------------------------|---------------------|---------|
|                          | <i>COMP</i>              | Two-way mixed-effects ANOVA | Inhibitor treatment         | 0.009               |         |
|                          |                          | Two-way mixed-effects ANOVA | Interaction                 | 0.020               |         |
|                          | <i>PRG4</i>              | Two-way mixed-effects ANOVA | Vector                      | < 0.001             |         |
|                          |                          | Two-way mixed-effects ANOVA | Inhibitor treatment         | 0.832               |         |
|                          |                          | Two-way mixed-effects ANOVA | Interaction                 | < 0.001             |         |
| Supplementary figure 35A | <i>COL2A1</i>            | Two-way mixed-effects ANOVA | Vector                      | < 0.001             |         |
|                          |                          | Two-way mixed-effects ANOVA | Inhibitor treatment         | 0.013               |         |
|                          |                          | Two-way mixed-effects ANOVA | Interaction                 | < 0.001             |         |
|                          | <i>COL11A2</i>           | Two-way mixed-effects ANOVA | Vector                      | < 0.001             |         |
|                          |                          | Two-way mixed-effects ANOVA | Inhibitor treatment         | < 0.001             |         |
|                          |                          | Two-way mixed-effects ANOVA | Interaction                 | < 0.001             |         |
|                          | <i>ACAN</i>              | Two-way mixed-effects ANOVA | Vector                      | < 0.001             |         |
|                          |                          | Two-way mixed-effects ANOVA | Inhibitor treatment         | 0.001               |         |
|                          |                          | Two-way mixed-effects ANOVA | Interaction                 | 0.837               |         |
|                          | <i>COMP</i>              | Two-way mixed-effects ANOVA | Vector                      | < 0.001             |         |
|                          |                          | Two-way mixed-effects ANOVA | Inhibitor treatment         | < 0.001             |         |
|                          |                          | Two-way mixed-effects ANOVA | Interaction                 | 0.049               |         |
|                          | <i>PRG4</i>              | Two-way mixed-effects ANOVA | Vector                      | < 0.001             |         |
|                          |                          | Two-way mixed-effects ANOVA | Inhibitor treatment         | 0.236               |         |
|                          |                          | Two-way mixed-effects ANOVA | Interaction                 | 0.016               |         |
|                          | Supplementary figure 35B | <i>COL2A1</i>               | Two-way mixed-effects ANOVA | Vector              | < 0.001 |
|                          |                          |                             | Two-way mixed-effects ANOVA | Inhibitor treatment | < 0.001 |
|                          |                          |                             | Two-way mixed-effects ANOVA | Interaction         | < 0.001 |
| <i>COL11A2</i>           |                          | Two-way mixed-effects ANOVA | Vector                      | < 0.001             |         |
|                          |                          | Two-way mixed-effects ANOVA | Inhibitor treatment         | < 0.001             |         |
|                          |                          | Two-way mixed-effects ANOVA | Interaction                 | < 0.001             |         |
| <i>ACAN</i>              |                          | Two-way mixed-effects ANOVA | Vector                      | 0.113               |         |
|                          |                          | Two-way mixed-effects ANOVA | Inhibitor treatment         | < 0.001             |         |
|                          |                          | Two-way mixed-effects ANOVA | Interaction                 | 0.005               |         |
| <i>COMP</i>              |                          | Two-way mixed-effects ANOVA | Vector                      | 0.003               |         |
|                          |                          | Two-way mixed-effects ANOVA | Inhibitor treatment         | < 0.001             |         |
|                          |                          | Two-way mixed-effects ANOVA | Interaction                 | < 0.001             |         |
| <i>PRG4</i>              |                          | Two-way mixed-effects ANOVA | Vector                      | < 0.001             |         |
|                          |                          | Two-way mixed-effects ANOVA | Inhibitor treatment         | 0.003               |         |
|                          |                          | Two-way mixed-effects ANOVA | Interaction                 | 0.007               |         |
| Supplementary figure 35C |                          | <i>COL2A1</i>               | Two-way mixed-effects ANOVA | Vector              | < 0.001 |
|                          |                          |                             | Two-way mixed-effects ANOVA | Inhibitor treatment | 0.002   |
|                          |                          |                             | Two-way mixed-effects ANOVA | Interaction         | < 0.001 |
|                          | <i>COL11A2</i>           | Two-way mixed-effects ANOVA | Vector                      | < 0.001             |         |
|                          |                          | Two-way mixed-effects ANOVA | Inhibitor treatment         | < 0.001             |         |



|             |  |                             |                     |         |
|-------------|--|-----------------------------|---------------------|---------|
|             |  | Two-way mixed-effects ANOVA | Interaction         | < 0.001 |
| <i>ACAN</i> |  | Two-way mixed-effects ANOVA | Vector              | 0.319   |
|             |  | Two-way mixed-effects ANOVA | Inhibitor treatment | 0.001   |
|             |  | Two-way mixed-effects ANOVA | Interaction         | 0.002   |
| <i>COMP</i> |  | Two-way mixed-effects ANOVA | Vector              | < 0.001 |
|             |  | Two-way mixed-effects ANOVA | Inhibitor treatment | < 0.001 |
|             |  | Two-way mixed-effects ANOVA | Interaction         | 0.003   |
| <i>PRG4</i> |  | Two-way mixed-effects ANOVA | Vector              | < 0.001 |
|             |  | Two-way mixed-effects ANOVA | Inhibitor treatment | < 0.001 |
|             |  | Two-way mixed-effects ANOVA | Interaction         | < 0.001 |

**Supplementary table 3. Significant URGs with versus without IL-1 $\beta$  stimulation in non-transduced samples.**

| Gene ID         | Gene name | Log2 FC  | P value   | FDR       |
|-----------------|-----------|----------|-----------|-----------|
| ENSG00000124875 | CXCL6     | 7.39E+00 | 2.01E-130 | 3.20E-126 |
| ENSG00000112096 | SOD2      | 4.50E+00 | 1.55E-106 | 1.24E-102 |
| ENSG00000128342 | LIF       | 3.77E+00 | 1.17E-98  | 6.23E-95  |
| ENSG00000163739 | CXCL1     | 9.33E+00 | 1.71E-84  | 6.80E-81  |
| ENSG00000105835 | NAMPT     | 2.18E+00 | 3.20E-84  | 1.02E-80  |
| ENSG00000169429 | CXCL8     | 9.82E+00 | 7.96E-79  | 2.11E-75  |
| ENSG00000104635 | SLC39A14  | 2.56E+00 | 5.10E-78  | 1.16E-74  |
| ENSG00000145901 | TNIP1     | 2.19E+00 | 5.87E-78  | 1.17E-74  |
| ENSG00000124145 | SDC4      | 2.32E+00 | 1.13E-73  | 2.00E-70  |
| ENSG00000163661 | PTX3      | 3.70E+00 | 6.86E-73  | 1.09E-69  |
| ENSG00000108691 | CCL2      | 4.48E+00 | 1.44E-71  | 2.09E-68  |
| ENSG00000144802 | NFKBIZ    | 3.12E+00 | 1.03E-70  | 1.37E-67  |
| ENSG00000184254 | ALDH1A3   | 2.14E+00 | 3.29E-69  | 4.03E-66  |
| ENSG00000122641 | INHBA     | 3.00E+00 | 7.91E-68  | 8.99E-65  |
| ENSG00000145555 | MYO10     | 1.89E+00 | 2.17E-65  | 2.30E-62  |
| ENSG00000081041 | CXCL2     | 5.75E+00 | 3.26E-64  | 3.24E-61  |
| ENSG00000137745 | MMP13     | 3.53E+00 | 8.33E-60  | 7.80E-57  |
| ENSG00000108179 | PPIF      | 1.83E+00 | 5.81E-59  | 5.14E-56  |
| ENSG00000100906 | NFKBIA    | 1.94E+00 | 7.82E-56  | 6.55E-53  |
| ENSG00000090339 | ICAM1     | 2.95E+00 | 1.41E-55  | 1.12E-52  |
| ENSG00000163734 | CXCL3     | 7.82E+00 | 7.84E-54  | 5.94E-51  |
| ENSG00000162692 | VCAM1     | 2.03E+00 | 6.19E-53  | 4.48E-50  |
| ENSG00000136244 | IL6       | 6.64E+00 | 7.23E-53  | 5.00E-50  |
| ENSG00000114251 | WNT5A     | 1.76E+00 | 2.61E-52  | 1.73E-49  |
| ENSG00000185215 | TNFAIP2   | 2.13E+00 | 3.46E-52  | 2.20E-49  |
| ENSG00000118257 | NRP2      | 3.37E+00 | 2.89E-51  | 1.77E-48  |
| ENSG00000163874 | ZC3H12A   | 2.96E+00 | 3.40E-49  | 2.00E-46  |
| ENSG00000133657 | ATP13A3   | 1.57E+00 | 9.15E-49  | 5.20E-46  |
| ENSG00000095752 | IL11      | 3.30E+00 | 1.86E-48  | 1.02E-45  |
| ENSG00000108342 | CSF3      | 1.14E+01 | 4.18E-48  | 2.22E-45  |
| ENSG00000072274 | TFRC      | 1.22E+00 | 1.37E-46  | 7.01E-44  |
| ENSG00000128641 | MYO1B     | 1.78E+00 | 2.36E-45  | 1.14E-42  |
| ENSG00000128606 | LRRC17    | 1.96E+00 | 5.38E-45  | 2.52E-42  |
| ENSG00000073756 | PTGS2     | 5.00E+00 | 1.53E-44  | 6.96E-42  |
| ENSG00000173391 | OLR1      | 5.94E+00 | 1.21E-43  | 5.34E-41  |
| ENSG00000138685 | FGF2      | 1.79E+00 | 6.07E-43  | 2.61E-40  |
| ENSG00000147454 | SLC25A37  | 1.76E+00 | 2.20E-41  | 9.21E-39  |
| ENSG00000134070 | IRAK2     | 2.75E+00 | 2.12E-40  | 8.64E-38  |
| ENSG00000146457 | WTAP      | 1.33E+00 | 3.14E-40  | 1.25E-37  |
| ENSG00000105810 | CDK6      | 1.91E+00 | 4.70E-40  | 1.82E-37  |
| ENSG00000117228 | GBP1      | 1.68E+00 | 2.64E-38  | 1.00E-35  |
| ENSG00000028277 | POU2F2    | 3.24E+00 | 9.63E-38  | 3.56E-35  |
| ENSG00000157168 | NRG1      | 2.34E+00 | 4.93E-37  | 1.78E-34  |

|                 |          |          |          |          |
|-----------------|----------|----------|----------|----------|
| ENSG00000118503 | TNFAIP3  | 2.94E+00 | 1.15E-36 | 4.06E-34 |
| ENSG00000123610 | TNFAIP6  | 2.89E+00 | 2.82E-36 | 9.77E-34 |
| ENSG00000115758 | ODC1     | 1.11E+00 | 4.35E-36 | 1.47E-33 |
| ENSG00000197632 | SERPINB2 | 9.33E+00 | 6.26E-35 | 2.03E-32 |
| ENSG00000049249 | TNFRSF9  | 3.12E+00 | 1.59E-34 | 5.06E-32 |
| ENSG00000106366 | SERPINE1 | 2.52E+00 | 1.67E-34 | 5.22E-32 |
| ENSG00000056558 | TRAF1    | 3.71E+00 | 5.55E-34 | 1.70E-31 |
| ENSG00000134954 | ETS1     | 1.55E+00 | 7.60E-34 | 2.28E-31 |
| ENSG00000026508 | CD44     | 2.61E+00 | 2.80E-33 | 8.26E-31 |
| ENSG00000176597 | B3GNT5   | 1.80E+00 | 3.41E-32 | 9.87E-30 |
| ENSG00000133816 | MICAL2   | 1.69E+00 | 4.29E-32 | 1.22E-29 |
| ENSG00000170017 | ALCAM    | 1.87E+00 | 5.99E-32 | 1.67E-29 |
| ENSG00000034152 | MAP2K3   | 1.16E+00 | 2.32E-31 | 6.38E-29 |
| ENSG00000172156 | CCL11    | 4.31E+00 | 4.75E-31 | 1.28E-28 |
| ENSG00000113070 | HBEGF    | 1.86E+00 | 5.68E-31 | 1.51E-28 |
| ENSG00000109320 | NFKB1    | 1.77E+00 | 2.63E-30 | 6.87E-28 |
| ENSG00000077150 | NFKB2    | 1.51E+00 | 5.21E-30 | 1.34E-27 |
| ENSG00000070961 | ATP2B1   | 1.10E+00 | 1.41E-29 | 3.51E-27 |
| ENSG00000135919 | SERPINE2 | 1.39E+00 | 2.40E-29 | 5.88E-27 |
| ENSG00000125538 | IL1B     | 7.03E+00 | 6.21E-29 | 1.48E-26 |
| ENSG00000105974 | CAV1     | 2.16E+00 | 9.16E-29 | 2.14E-26 |
| ENSG00000114270 | COL7A1   | 1.10E+00 | 3.17E-28 | 7.32E-26 |
| ENSG00000057019 | DCBLD2   | 1.06E+00 | 3.45E-27 | 7.72E-25 |
| ENSG00000124102 | PI3      | 8.41E+00 | 1.22E-26 | 2.66E-24 |
| ENSG00000100234 | TIMP3    | 1.80E+00 | 6.22E-26 | 1.34E-23 |
| ENSG00000165732 | DDX21    | 1.10E+00 | 5.04E-25 | 1.07E-22 |
| ENSG00000105855 | ITGB8    | 2.68E+00 | 1.42E-24 | 2.97E-22 |
| ENSG00000101384 | JAG1     | 1.20E+00 | 2.96E-24 | 6.13E-22 |
| ENSG00000104419 | NDRG1    | 1.59E+00 | 3.23E-24 | 6.59E-22 |
| ENSG00000100739 | BDKRB1   | 3.25E+00 | 3.50E-24 | 7.05E-22 |
| ENSG00000116717 | GADD45A  | 1.35E+00 | 3.65E-24 | 7.26E-22 |
| ENSG00000164400 | CSF2     | 6.56E+00 | 3.85E-24 | 7.57E-22 |
| ENSG00000137331 | IER3     | 2.46E+00 | 4.58E-24 | 8.89E-22 |
| ENSG00000182752 | PAPPA    | 2.75E+00 | 2.96E-22 | 5.61E-20 |
| ENSG00000068366 | ACSL4    | 1.05E+00 | 3.84E-22 | 7.20E-20 |
| ENSG00000168398 | BDKRB2   | 2.09E+00 | 5.00E-22 | 9.25E-20 |
| ENSG00000102755 | FLT1     | 2.01E+00 | 5.33E-22 | 9.75E-20 |
| ENSG00000122591 | FAM126A  | 1.24E+00 | 6.51E-22 | 1.18E-19 |
| ENSG00000136048 | DRAM1    | 1.20E+00 | 1.93E-21 | 3.46E-19 |
| ENSG00000159200 | RCAN1    | 1.71E+00 | 2.60E-21 | 4.59E-19 |
| ENSG00000146648 | EGFR     | 1.68E+00 | 7.42E-21 | 1.27E-18 |
| ENSG00000196878 | LAMB3    | 2.16E+00 | 8.85E-21 | 1.50E-18 |
| ENSG00000132334 | PTPRE    | 1.60E+00 | 3.14E-20 | 5.26E-18 |
| ENSG00000130066 | SAT1     | 1.93E+00 | 6.29E-20 | 1.04E-17 |
| ENSG00000171763 | SPATA5L1 | 1.68E+00 | 8.78E-20 | 1.44E-17 |

|                 |             |          |          |          |
|-----------------|-------------|----------|----------|----------|
| ENSG00000177311 | ZBTB38      | 1.02E+00 | 5.51E-19 | 8.86E-17 |
| ENSG00000137449 | CPEB2       | 2.83E+00 | 9.57E-19 | 1.52E-16 |
| ENSG00000115009 | CCL20       | 7.38E+00 | 3.17E-18 | 5.00E-16 |
| ENSG00000185022 | MAFF        | 1.81E+00 | 3.27E-18 | 5.10E-16 |
| ENSG00000168389 | MFSD2A      | 1.38E+00 | 6.81E-18 | 1.04E-15 |
| ENSG00000131435 | PDLIM4      | 1.43E+00 | 1.01E-17 | 1.52E-15 |
| ENSG00000225614 | ZNF469      | 1.69E+00 | 4.12E-17 | 6.13E-15 |
| ENSG00000167034 | NKX3-1      | 1.59E+00 | 6.11E-17 | 8.93E-15 |
| ENSG00000038382 | TRIO        | 1.08E+00 | 6.38E-17 | 9.23E-15 |
| ENSG00000092969 | TGFB2       | 1.21E+00 | 9.04E-17 | 1.28E-14 |
| ENSG00000137267 | TUBB2A      | 1.21E+00 | 1.50E-16 | 2.10E-14 |
| ENSG00000174136 | RGMB        | 1.89E+00 | 1.58E-16 | 2.19E-14 |
| ENSG00000177606 | JUN         | 1.25E+00 | 2.71E-16 | 3.68E-14 |
| ENSG00000104856 | RELB        | 1.47E+00 | 2.73E-16 | 3.69E-14 |
| ENSG00000166592 | RRAD        | 1.37E+00 | 4.57E-16 | 5.91E-14 |
| ENSG00000115594 | IL1R1       | 1.50E+00 | 6.02E-16 | 7.67E-14 |
| ENSG00000125730 | C3          | 2.36E+00 | 6.50E-16 | 8.21E-14 |
| ENSG00000128422 | KRT17       | 1.76E+00 | 9.19E-16 | 1.15E-13 |
| ENSG00000075426 | FOSL2       | 1.21E+00 | 1.25E-15 | 1.55E-13 |
| ENSG00000159399 | HK2         | 2.04E+00 | 1.40E-15 | 1.71E-13 |
| ENSG00000125266 | EFNB2       | 1.51E+00 | 1.73E-15 | 2.09E-13 |
| ENSG00000023445 | BIRC3       | 2.51E+00 | 1.79E-15 | 2.12E-13 |
| ENSG00000118515 | SGK1        | 1.06E+00 | 1.87E-15 | 2.21E-13 |
| ENSG00000125148 | MT2A        | 2.47E+00 | 1.91E-15 | 2.24E-13 |
| ENSG00000175592 | FOSL1       | 1.63E+00 | 1.97E-15 | 2.29E-13 |
| ENSG00000249992 | TMEM158     | 1.99E+00 | 2.19E-15 | 2.52E-13 |
| ENSG00000234883 | MIR155HG    | 4.20E+00 | 3.89E-15 | 4.43E-13 |
| ENSG00000157557 | ETS2        | 1.65E+00 | 4.20E-15 | 4.74E-13 |
| ENSG00000110330 | BIRC2       | 1.28E+00 | 5.83E-15 | 6.53E-13 |
| ENSG00000120149 | MSX2        | 1.69E+00 | 7.41E-15 | 8.25E-13 |
| ENSG00000039560 | RAI14       | 1.03E+00 | 9.23E-15 | 1.02E-12 |
| ENSG00000163347 | CLDN1       | 4.06E+00 | 2.08E-14 | 2.26E-12 |
| ENSG00000131459 | GFPT2       | 1.18E+00 | 2.61E-14 | 2.80E-12 |
| ENSG00000087510 | TFAP2C      | 1.63E+00 | 4.80E-14 | 5.05E-12 |
| ENSG00000143603 | KCNN3       | 1.92E+00 | 4.82E-14 | 5.05E-12 |
| ENSG00000107249 | GLIS3       | 1.73E+00 | 5.80E-14 | 5.99E-12 |
| ENSG00000041982 | TNC         | 1.86E+00 | 8.93E-14 | 9.05E-12 |
| ENSG00000107338 | SHB         | 1.06E+00 | 1.01E-13 | 1.01E-11 |
| ENSG00000150630 | VEGFC       | 1.54E+00 | 1.34E-13 | 1.31E-11 |
| ENSG00000125430 | HS3ST3B1    | 2.65E+00 | 1.60E-13 | 1.53E-11 |
| ENSG00000157654 | PALM2-AKAP2 | 1.00E+00 | 1.59E-13 | 1.53E-11 |
| ENSG00000156273 | BACH1       | 1.00E+00 | 1.70E-13 | 1.62E-11 |
| ENSG00000131979 | GCH1        | 1.47E+00 | 4.36E-13 | 3.99E-11 |
| ENSG00000166920 | C15orf48    | 7.17E+00 | 6.77E-13 | 6.02E-11 |
| ENSG00000085117 | CD82        | 1.28E+00 | 8.34E-13 | 7.30E-11 |

|                 |           |          |          |          |
|-----------------|-----------|----------|----------|----------|
| ENSG00000115963 | RND3      | 1.47E+00 | 1.11E-12 | 9.56E-11 |
| ENSG00000163297 | ANTXR2    | 1.67E+00 | 1.51E-12 | 1.29E-10 |
| ENSG00000115363 | EVA1A     | 2.77E+00 | 2.32E-12 | 1.97E-10 |
| ENSG00000169594 | BNC1      | 2.17E+00 | 3.31E-12 | 2.76E-10 |
| ENSG00000108688 | CCL7      | 4.16E+00 | 7.08E-12 | 5.72E-10 |
| ENSG00000144749 | LRIG1     | 1.06E+00 | 8.46E-12 | 6.80E-10 |
| ENSG00000074416 | MGLL      | 2.06E+00 | 8.97E-12 | 7.14E-10 |
| ENSG00000173530 | TNFRSF10D | 1.20E+00 | 1.16E-11 | 9.06E-10 |
| ENSG00000164251 | F2RL1     | 2.17E+00 | 1.36E-11 | 1.06E-09 |
| ENSG00000128567 | PODXL     | 1.24E+00 | 1.85E-11 | 1.42E-09 |
| ENSG00000103888 | CEMIP     | 1.67E+00 | 1.87E-11 | 1.43E-09 |
| ENSG00000104368 | PLAT      | 1.26E+00 | 2.61E-11 | 1.96E-09 |
| ENSG00000178860 | MSC       | 1.34E+00 | 2.64E-11 | 1.97E-09 |
| ENSG00000181649 | PHLDA2    | 1.36E+00 | 3.23E-11 | 2.39E-09 |
| ENSG00000182985 | CADM1     | 1.14E+00 | 3.60E-11 | 2.65E-09 |
| ENSG00000115756 | HPCAL1    | 1.05E+00 | 4.29E-11 | 3.13E-09 |
| ENSG00000197208 | SLC22A4   | 2.06E+00 | 4.94E-11 | 3.59E-09 |
| ENSG00000160326 | SLC2A6    | 1.21E+00 | 5.44E-11 | 3.94E-09 |
| ENSG00000163814 | CDCP1     | 1.28E+00 | 6.10E-11 | 4.39E-09 |
| ENSG00000115919 | KYNU      | 3.90E+00 | 7.83E-11 | 5.56E-09 |
| ENSG00000171724 | VAT1L     | 1.49E+00 | 8.42E-11 | 5.93E-09 |
| ENSG00000148848 | ADAM12    | 1.06E+00 | 8.93E-11 | 6.23E-09 |
| ENSG00000052749 | RRP12     | 1.05E+00 | 1.03E-10 | 7.07E-09 |
| ENSG00000171608 | PIK3CD    | 1.97E+00 | 1.02E-10 | 7.07E-09 |
| ENSG00000181634 | TNFSF15   | 3.12E+00 | 1.03E-10 | 7.07E-09 |
| ENSG00000020577 | SAMD4A    | 1.38E+00 | 1.04E-10 | 7.11E-09 |
| ENSG00000031081 | ARHGAP31  | 1.54E+00 | 1.14E-10 | 7.70E-09 |
| ENSG00000168685 | IL7R      | 1.72E+00 | 1.56E-10 | 1.03E-08 |
| ENSG00000197635 | DPP4      | 1.75E+00 | 2.03E-10 | 1.31E-08 |
| ENSG00000138623 | SEMA7A    | 1.61E+00 | 2.16E-10 | 1.39E-08 |
| ENSG00000166401 | SERPINB8  | 2.22E+00 | 3.36E-10 | 2.13E-08 |
| ENSG00000108700 | CCL8      | 6.40E+00 | 4.16E-10 | 2.60E-08 |
| ENSG00000162407 | PLPP3     | 5.15E+00 | 4.33E-10 | 2.69E-08 |
| ENSG00000166250 | CLMP      | 1.03E+00 | 4.87E-10 | 2.99E-08 |
| ENSG00000204131 | NHSL2     | 2.81E+00 | 7.25E-10 | 4.29E-08 |
| ENSG00000162645 | GBP2      | 1.76E+00 | 7.30E-10 | 4.30E-08 |
| ENSG00000165029 | ABCA1     | 1.18E+00 | 7.88E-10 | 4.63E-08 |
| ENSG00000159167 | STC1      | 1.90E+00 | 8.53E-10 | 4.97E-08 |
| ENSG00000123908 | AGO2      | 1.01E+00 | 1.27E-09 | 7.23E-08 |
| ENSG00000140379 | BCL2A1    | 6.43E+00 | 1.29E-09 | 7.30E-08 |
| ENSG00000008517 | IL32      | 1.68E+00 | 1.34E-09 | 7.56E-08 |
| ENSG00000154734 | ADAMTS1   | 1.71E+00 | 1.49E-09 | 8.29E-08 |
| ENSG00000149968 | MMP3      | 5.01E+00 | 1.84E-09 | 9.99E-08 |
| ENSG00000049192 | ADAMTS6   | 1.37E+00 | 1.91E-09 | 1.03E-07 |
| ENSG00000270069 | MIR222HG  | 1.59E+00 | 2.28E-09 | 1.21E-07 |

|                 |            |          |          |          |
|-----------------|------------|----------|----------|----------|
| ENSG00000157827 | FMNL2      | 1.01E+00 | 2.68E-09 | 1.40E-07 |
| ENSG00000173918 | C1QTNF1    | 1.60E+00 | 2.98E-09 | 1.54E-07 |
| ENSG00000232949 | AC002480.2 | 5.27E+00 | 3.26E-09 | 1.68E-07 |
| ENSG00000100985 | MMP9       | 1.65E+00 | 3.49E-09 | 1.79E-07 |
| ENSG00000116016 | EPAS1      | 1.02E+00 | 4.15E-09 | 2.10E-07 |
| ENSG00000146592 | CREB5      | 2.18E+00 | 4.26E-09 | 2.14E-07 |
| ENSG00000162552 | WNT4       | 3.28E+00 | 4.27E-09 | 2.14E-07 |
| ENSG00000155846 | PPARGC1B   | 1.74E+00 | 4.65E-09 | 2.31E-07 |
| ENSG00000187479 | C11orf96   | 2.17E+00 | 5.37E-09 | 2.65E-07 |
| ENSG00000145779 | TNFAIP8    | 1.62E+00 | 5.56E-09 | 2.71E-07 |
| ENSG00000122862 | SRGN       | 1.45E+00 | 7.97E-09 | 3.79E-07 |
| ENSG00000143067 | ZNF697     | 1.23E+00 | 8.97E-09 | 4.21E-07 |
| ENSG00000117597 | UTP25      | 1.08E+00 | 1.19E-08 | 5.49E-07 |
| ENSG00000139278 | GLIPR1     | 1.48E+00 | 1.34E-08 | 6.07E-07 |
| ENSG00000184545 | DUSP8      | 1.17E+00 | 1.49E-08 | 6.73E-07 |
| ENSG00000003402 | CFLAR      | 1.00E+00 | 1.96E-08 | 8.71E-07 |
| ENSG00000134259 | NGF        | 2.41E+00 | 2.22E-08 | 9.60E-07 |
| ENSG00000145819 | ARHGAP26   | 1.14E+00 | 2.33E-08 | 1.00E-06 |
| ENSG00000164171 | ITGA2      | 1.44E+00 | 2.34E-08 | 1.01E-06 |
| ENSG00000139289 | PHLDA1     | 1.78E+00 | 2.38E-08 | 1.02E-06 |
| ENSG00000011422 | PLAUR      | 1.45E+00 | 2.40E-08 | 1.02E-06 |
| ENSG00000179041 | RRS1       | 1.18E+00 | 2.49E-08 | 1.06E-06 |
| ENSG00000148926 | ADM        | 1.27E+00 | 3.21E-08 | 1.33E-06 |
| ENSG00000138835 | RGS3       | 1.57E+00 | 3.87E-08 | 1.59E-06 |
| ENSG00000164761 | TNFRSF11B  | 1.90E+00 | 4.12E-08 | 1.68E-06 |
| ENSG00000163638 | ADAMTS9    | 5.55E+00 | 4.21E-08 | 1.71E-06 |
| ENSG00000236453 | AC003092.1 | 3.03E+00 | 4.97E-08 | 1.97E-06 |
| ENSG00000182957 | SPATA13    | 1.64E+00 | 5.71E-08 | 2.24E-06 |
| ENSG00000107443 | CCNJ       | 1.15E+00 | 6.50E-08 | 2.51E-06 |
| ENSG00000113645 | WWC1       | 1.39E+00 | 7.71E-08 | 2.92E-06 |
| ENSG00000188064 | WNT7B      | 2.11E+00 | 8.04E-08 | 3.02E-06 |
| ENSG00000104951 | IL4I1      | 2.71E+00 | 8.29E-08 | 3.10E-06 |
| ENSG00000196581 | AJAP1      | 4.73E+00 | 8.56E-08 | 3.17E-06 |
| ENSG00000176907 | TCIM       | 4.63E+00 | 8.59E-08 | 3.17E-06 |
| ENSG00000065320 | NTN1       | 1.08E+00 | 1.17E-07 | 4.20E-06 |
| ENSG00000149948 | HMGA2      | 1.88E+00 | 1.21E-07 | 4.32E-06 |
| ENSG00000148841 | ITPRIP     | 1.08E+00 | 1.34E-07 | 4.72E-06 |
| ENSG00000117114 | ADGRL2     | 2.29E+00 | 1.49E-07 | 5.22E-06 |
| ENSG00000066583 | ISOC1      | 1.18E+00 | 1.68E-07 | 5.83E-06 |
| ENSG00000184441 | AP001062.1 | 1.89E+00 | 1.72E-07 | 5.93E-06 |
| ENSG00000121440 | PDZRN3     | 1.26E+00 | 1.85E-07 | 6.32E-06 |
| ENSG00000153823 | PID1       | 1.96E+00 | 1.86E-07 | 6.33E-06 |
| ENSG00000254087 | LYN        | 1.19E+00 | 2.04E-07 | 6.91E-06 |
| ENSG00000087494 | PTHLH      | 2.59E+00 | 2.79E-07 | 9.15E-06 |
| ENSG00000149289 | ZC3H12C    | 1.38E+00 | 3.01E-07 | 9.79E-06 |

|                 |            |          |          |          |
|-----------------|------------|----------|----------|----------|
| ENSG00000251194 | AL133330.1 | 2.72E+00 | 4.52E-07 | 1.41E-05 |
| ENSG00000144218 | AFF3       | 3.10E+00 | 5.32E-07 | 1.62E-05 |
| ENSG00000261327 | AC134312.5 | 1.49E+00 | 1.07E-06 | 3.12E-05 |
| ENSG00000010818 | HIVEP2     | 1.02E+00 | 1.85E-06 | 5.04E-05 |
| ENSG00000186340 | THBS2      | 1.01E+00 | 2.20E-06 | 5.88E-05 |
| ENSG00000019549 | SNAI2      | 1.51E+00 | 2.42E-06 | 6.40E-05 |
| ENSG00000271503 | CCL5       | 4.08E+00 | 2.43E-06 | 6.41E-05 |
| ENSG00000168917 | SLC35G2    | 1.14E+00 | 2.53E-06 | 6.65E-05 |
| ENSG00000148346 | LCN2       | 3.88E+00 | 2.64E-06 | 6.87E-05 |
| ENSG00000198121 | LPAR1      | 1.29E+00 | 2.91E-06 | 7.53E-05 |
| ENSG00000128274 | A4GALT     | 1.05E+00 | 2.99E-06 | 7.71E-05 |
| ENSG00000164619 | BMPER      | 2.60E+00 | 4.46E-06 | 1.11E-04 |
| ENSG00000124813 | RUNX2      | 1.21E+00 | 5.18E-06 | 1.27E-04 |
| ENSG00000133805 | AMPD3      | 1.65E+00 | 5.26E-06 | 1.28E-04 |
| ENSG00000139211 | AMIGO2     | 1.20E+00 | 5.51E-06 | 1.33E-04 |
| ENSG00000164164 | OTUD4      | 1.09E+00 | 7.76E-06 | 1.80E-04 |
| ENSG00000015475 | BID        | 1.38E+00 | 9.14E-06 | 2.09E-04 |
| ENSG00000123095 | BHLHE41    | 1.06E+00 | 1.02E-05 | 2.28E-04 |
| ENSG00000197646 | PDCD1LG2   | 1.69E+00 | 1.02E-05 | 2.28E-04 |
| ENSG00000102802 | MEDAG      | 1.72E+00 | 1.05E-05 | 2.33E-04 |
| ENSG00000163435 | ELF3       | 2.18E+00 | 1.09E-05 | 2.40E-04 |
| ENSG00000272168 | CASC15     | 1.95E+00 | 1.15E-05 | 2.52E-04 |
| ENSG00000162490 | DRAXIN     | 1.33E+00 | 1.66E-05 | 3.46E-04 |
| ENSG00000077238 | IL4R       | 1.01E+00 | 1.69E-05 | 3.49E-04 |
| ENSG00000272841 | AL139393.3 | 1.13E+00 | 1.82E-05 | 3.74E-04 |
| ENSG00000171451 | DSEL       | 1.31E+00 | 1.87E-05 | 3.84E-04 |
| ENSG00000232759 | AC002480.1 | 1.89E+00 | 2.06E-05 | 4.16E-04 |
| ENSG00000167191 | GPRC5B     | 1.02E+00 | 2.20E-05 | 4.41E-04 |
| ENSG00000173077 | DEC1       | 2.49E+00 | 2.27E-05 | 4.52E-04 |
| ENSG00000067798 | NAV3       | 1.06E+00 | 2.64E-05 | 5.18E-04 |
| ENSG00000237515 | SHISA9     | 2.83E+00 | 2.66E-05 | 5.20E-04 |
| ENSG00000102096 | PIM2       | 1.15E+00 | 2.68E-05 | 5.24E-04 |
| ENSG00000266709 | AC005224.3 | 1.82E+00 | 2.97E-05 | 5.72E-04 |
| ENSG00000152503 | TRIM36     | 1.82E+00 | 3.03E-05 | 5.81E-04 |
| ENSG00000162595 | DIRAS3     | 2.29E+00 | 3.58E-05 | 6.74E-04 |
| ENSG00000082397 | EPB41L3    | 2.52E+00 | 3.63E-05 | 6.80E-04 |
| ENSG00000135318 | NT5E       | 1.39E+00 | 4.17E-05 | 7.66E-04 |
| ENSG00000013619 | MAMLD1     | 1.42E+00 | 4.39E-05 | 8.01E-04 |
| ENSG00000248323 | LUCAT1     | 2.36E+00 | 4.46E-05 | 8.10E-04 |
| ENSG00000154133 | ROBO4      | 2.17E+00 | 4.47E-05 | 8.11E-04 |
| ENSG00000105971 | CAV2       | 1.11E+00 | 4.88E-05 | 8.72E-04 |
| ENSG00000102554 | KLF5       | 1.98E+00 | 5.63E-05 | 9.87E-04 |
| ENSG00000105825 | TFPI2      | 1.43E+00 | 5.80E-05 | 1.01E-03 |
| ENSG00000164181 | ELOVL7     | 1.26E+00 | 6.09E-05 | 1.05E-03 |
| ENSG00000169896 | ITGAM      | 3.32E+00 | 6.09E-05 | 1.05E-03 |

|                 |            |          |          |          |
|-----------------|------------|----------|----------|----------|
| ENSG00000265808 | SEC22B     | 1.10E+00 | 6.17E-05 | 1.06E-03 |
| ENSG00000171522 | PTGER4     | 1.32E+00 | 6.30E-05 | 1.08E-03 |
| ENSG00000144583 | MARCH4     | 2.07E+00 | 6.95E-05 | 1.17E-03 |
| ENSG00000099992 | TBC1D10A   | 1.02E+00 | 7.02E-05 | 1.18E-03 |
| ENSG00000198846 | TOX        | 3.21E+00 | 7.56E-05 | 1.26E-03 |
| ENSG00000129194 | SOX15      | 3.58E+00 | 7.59E-05 | 1.26E-03 |
| ENSG00000250519 | AP002784.1 | 1.32E+00 | 8.47E-05 | 1.38E-03 |
| ENSG00000272269 | AL138724.1 | 1.33E+00 | 9.23E-05 | 1.48E-03 |
| ENSG00000197442 | MAP3K5     | 1.10E+00 | 9.50E-05 | 1.51E-03 |
| ENSG00000163376 | KBTBD8     | 1.92E+00 | 1.10E-04 | 1.70E-03 |
| ENSG00000227507 | LTB        | 4.22E+00 | 1.39E-04 | 2.06E-03 |
| ENSG00000253522 | MIR3142HG  | 5.08E+00 | 1.46E-04 | 2.15E-03 |
| ENSG00000183287 | CCBE1      | 1.42E+00 | 1.54E-04 | 2.24E-03 |
| ENSG00000165685 | TMEM52B    | 2.98E+00 | 1.57E-04 | 2.27E-03 |
| ENSG00000123689 | G0S2       | 2.84E+00 | 1.75E-04 | 2.47E-03 |
| ENSG00000258102 | MAP1LC3B2  | 2.41E+00 | 1.96E-04 | 2.71E-03 |
| ENSG00000105088 | OLFM2      | 1.94E+00 | 2.07E-04 | 2.83E-03 |
| ENSG00000172738 | TMEM217    | 1.50E+00 | 2.07E-04 | 2.83E-03 |
| ENSG00000110042 | DTX4       | 2.31E+00 | 2.19E-04 | 2.97E-03 |
| ENSG00000143507 | DUSP10     | 1.05E+00 | 2.21E-04 | 2.98E-03 |
| ENSG00000206538 | VGLL3      | 1.41E+00 | 2.45E-04 | 3.26E-03 |
| ENSG00000148459 | PDSS1      | 1.06E+00 | 2.61E-04 | 3.44E-03 |
| ENSG00000075223 | SEMA3C     | 1.02E+00 | 2.75E-04 | 3.59E-03 |
| ENSG00000184012 | TMPRSS2    | 3.27E+00 | 2.78E-04 | 3.61E-03 |
| ENSG00000235885 | LINC01828  | 3.15E+00 | 2.86E-04 | 3.70E-03 |
| ENSG00000198729 | PPP1R14C   | 1.47E+00 | 3.05E-04 | 3.90E-03 |
| ENSG00000141994 | DUS3L      | 1.03E+00 | 3.27E-04 | 4.14E-03 |
| ENSG00000233058 | LINC00884  | 2.07E+00 | 3.64E-04 | 4.52E-03 |
| ENSG00000174600 | CMKLR1     | 2.47E+00 | 4.04E-04 | 4.91E-03 |
| ENSG00000179431 | FJX1       | 1.38E+00 | 4.26E-04 | 5.12E-03 |
| ENSG00000107968 | MAP3K8     | 1.91E+00 | 4.33E-04 | 5.19E-03 |
| ENSG00000126561 | STAT5A     | 1.26E+00 | 4.47E-04 | 5.31E-03 |
| ENSG00000137033 | IL33       | 3.77E+00 | 6.05E-04 | 6.86E-03 |
| ENSG00000158125 | XDH        | 3.49E+00 | 6.10E-04 | 6.90E-03 |
| ENSG00000120899 | PTK2B      | 1.20E+00 | 6.14E-04 | 6.94E-03 |
| ENSG00000275131 | AC241952.1 | 2.77E+00 | 6.81E-04 | 7.59E-03 |
| ENSG00000170989 | S1PR1      | 3.55E+00 | 7.45E-04 | 8.17E-03 |
| ENSG00000242829 | RPS26P21   | 1.88E+00 | 7.59E-04 | 8.28E-03 |
| ENSG00000226380 | AC016831.1 | 1.27E+00 | 7.64E-04 | 8.34E-03 |
| ENSG00000153162 | BMP6       | 3.16E+00 | 8.30E-04 | 8.91E-03 |
| ENSG00000101230 | ISM1       | 3.30E+00 | 8.40E-04 | 8.99E-03 |
| ENSG00000184374 | COLEC10    | 1.27E+00 | 8.40E-04 | 8.99E-03 |
| ENSG00000189056 | RELN       | 4.27E+00 | 8.46E-04 | 9.02E-03 |
| ENSG00000261040 | WFDC21P    | 1.34E+00 | 8.45E-04 | 9.02E-03 |
| ENSG00000154736 | ADAMTS5    | 1.40E+00 | 8.50E-04 | 9.03E-03 |



|                 |            |          |          |          |
|-----------------|------------|----------|----------|----------|
| ENSG00000162892 | IL24       | 4.18E+00 | 8.55E-04 | 9.08E-03 |
| ENSG00000135842 | NIBAN1     | 1.53E+00 | 8.64E-04 | 9.15E-03 |
| ENSG00000100003 | SEC14L2    | 1.17E+00 | 8.70E-04 | 9.21E-03 |
| ENSG00000104369 | JPH1       | 1.70E+00 | 9.19E-04 | 9.58E-03 |
| ENSG00000165617 | DACT1      | 1.12E+00 | 9.79E-04 | 1.01E-02 |
| ENSG00000169715 | MT1E       | 1.04E+00 | 9.99E-04 | 1.02E-02 |
| ENSG00000185483 | ROR1       | 1.07E+00 | 1.06E-03 | 1.07E-02 |
| ENSG00000112175 | BMP5       | 1.18E+00 | 1.07E-03 | 1.07E-02 |
| ENSG00000223485 | LINC01615  | 1.36E+00 | 1.15E-03 | 1.14E-02 |
| ENSG00000277117 | FP565260.3 | 3.13E+00 | 1.21E-03 | 1.20E-02 |
| ENSG00000085982 | USP40      | 1.61E+00 | 1.27E-03 | 1.24E-02 |
| ENSG00000188112 | C6orf132   | 1.16E+00 | 1.30E-03 | 1.27E-02 |
| ENSG00000157570 | TSPAN18    | 1.21E+00 | 1.33E-03 | 1.29E-02 |
| ENSG00000169067 | ACTBL2     | 1.33E+00 | 1.41E-03 | 1.34E-02 |
| ENSG00000137501 | SYTL2      | 1.11E+00 | 1.45E-03 | 1.38E-02 |
| ENSG00000168961 | LGALS9     | 1.86E+00 | 1.74E-03 | 1.59E-02 |
| ENSG00000247626 | MARS2      | 1.23E+00 | 1.82E-03 | 1.64E-02 |
| ENSG00000197467 | COL13A1    | 2.11E+00 | 1.90E-03 | 1.70E-02 |
| ENSG00000197249 | SERPINA1   | 3.37E+00 | 1.92E-03 | 1.71E-02 |
| ENSG00000100628 | ASB2       | 4.14E+00 | 1.94E-03 | 1.72E-02 |
| ENSG00000164949 | GEM        | 1.16E+00 | 2.20E-03 | 1.92E-02 |
| ENSG00000106078 | COBL       | 3.53E+00 | 2.21E-03 | 1.92E-02 |
| ENSG00000116711 | PLA2G4A    | 1.45E+00 | 2.25E-03 | 1.95E-02 |
| ENSG00000157111 | TMEM171    | 2.15E+00 | 2.34E-03 | 2.00E-02 |
| ENSG00000060558 | GNA15      | 2.94E+00 | 2.44E-03 | 2.07E-02 |
| ENSG00000145911 | N4BP3      | 3.37E+00 | 2.47E-03 | 2.10E-02 |
| ENSG00000148082 | SHC3       | 1.27E+00 | 2.49E-03 | 2.11E-02 |
| ENSG00000279692 | AC110285.6 | 1.18E+00 | 2.52E-03 | 2.12E-02 |
| ENSG00000160223 | ICOSLG     | 2.06E+00 | 2.58E-03 | 2.16E-02 |
| ENSG00000160712 | IL6R       | 1.18E+00 | 2.69E-03 | 2.23E-02 |
| ENSG00000270210 | AC104695.3 | 3.97E+00 | 2.89E-03 | 2.36E-02 |
| ENSG00000183044 | ABAT       | 1.13E+00 | 3.16E-03 | 2.53E-02 |
| ENSG00000057149 | SERPINB3   | 3.34E+00 | 3.17E-03 | 2.53E-02 |
| ENSG00000125726 | CD70       | 1.01E+00 | 3.27E-03 | 2.60E-02 |
| ENSG00000145040 | UCN2       | 1.03E+00 | 3.41E-03 | 2.69E-02 |
| ENSG00000179133 | C10orf67   | 2.17E+00 | 3.50E-03 | 2.74E-02 |
| ENSG00000226084 | AC113935.1 | 1.23E+00 | 3.52E-03 | 2.75E-02 |
| ENSG00000167772 | ANGPTL4    | 1.02E+00 | 3.92E-03 | 2.98E-02 |
| ENSG00000134802 | SLC43A3    | 1.19E+00 | 3.92E-03 | 2.98E-02 |
| ENSG00000105246 | EBI3       | 1.01E+00 | 4.19E-03 | 3.12E-02 |
| ENSG00000170485 | NPAS2      | 1.16E+00 | 4.20E-03 | 3.13E-02 |
| ENSG00000172137 | CALB2      | 2.72E+00 | 4.34E-03 | 3.20E-02 |
| ENSG00000173432 | SAA1       | 2.62E+00 | 4.58E-03 | 3.35E-02 |
| ENSG00000234678 | ELF3-AS1   | 3.16E+00 | 4.60E-03 | 3.36E-02 |
| ENSG00000002079 | MYH16      | 2.93E+00 | 4.99E-03 | 3.59E-02 |

|                 |            |          |          |          |
|-----------------|------------|----------|----------|----------|
| ENSG00000180152 | XIAPP3     | 3.45E+00 | 4.99E-03 | 3.59E-02 |
| ENSG00000171889 | MIR31HG    | 1.15E+00 | 5.05E-03 | 3.63E-02 |
| ENSG00000177283 | FZD8       | 1.18E+00 | 5.15E-03 | 3.69E-02 |
| ENSG00000199024 | MIR103A2   | 1.95E+00 | 5.48E-03 | 3.86E-02 |
| ENSG00000172458 | IL17D      | 1.85E+00 | 5.70E-03 | 3.98E-02 |
| ENSG00000163810 | TGM4       | 2.93E+00 | 6.12E-03 | 4.21E-02 |
| ENSG00000134363 | FST        | 1.21E+00 | 6.23E-03 | 4.26E-02 |
| ENSG00000170075 | GPR37L1    | 2.88E+00 | 6.27E-03 | 4.28E-02 |
| ENSG00000287382 | AC110611.2 | 3.15E+00 | 6.38E-03 | 4.34E-02 |
| ENSG00000173210 | ABLIM3     | 1.21E+00 | 6.51E-03 | 4.42E-02 |
| ENSG00000280143 | AP000892.4 | 3.25E+00 | 7.06E-03 | 4.68E-02 |
| ENSG00000168824 | NSG1       | 1.60E+00 | 7.15E-03 | 4.73E-02 |
| ENSG00000229563 | LINC01204  | 2.28E+00 | 7.26E-03 | 4.78E-02 |
| ENSG00000260862 | AC099506.1 | 2.06E+00 | 7.28E-03 | 4.79E-02 |
| ENSG00000105499 | PLA2G4C    | 1.09E+00 | 7.41E-03 | 4.85E-02 |
| ENSG00000230647 | AC022816.1 | 2.58E+00 | 7.66E-03 | 4.96E-02 |

**Supplementary table 4. Significant DRGs with versus without IL1- $\beta$  stimulation in non-transduced samples.**

| Gene ID         | Gene name | Log2 FC   | P value  | FDR      |
|-----------------|-----------|-----------|----------|----------|
| ENSG00000187634 | SAMD11    | -3.04E+00 | 1.38E-29 | 3.49E-27 |
| ENSG00000162496 | DHRS3     | -2.36E+00 | 4.05E-29 | 9.76E-27 |
| ENSG00000129422 | MTUS1     | -1.94E+00 | 5.53E-21 | 9.67E-19 |
| ENSG00000185551 | NR2F2     | -1.07E+00 | 5.04E-19 | 8.19E-17 |
| ENSG00000069011 | PITX1     | -1.09E+00 | 1.68E-15 | 2.04E-13 |
| ENSG00000148120 | AOPEP     | -1.24E+00 | 1.79E-13 | 1.70E-11 |
| ENSG00000198794 | SCAMP5    | -1.35E+00 | 3.10E-13 | 2.90E-11 |
| ENSG00000173442 | EHBP1L1   | -1.46E+00 | 5.00E-13 | 4.55E-11 |
| ENSG00000172819 | RARG      | -1.68E+00 | 5.86E-13 | 5.24E-11 |
| ENSG00000122592 | HOXA7     | -1.60E+00 | 7.06E-13 | 6.24E-11 |
| ENSG00000250510 | GPR162    | -2.27E+00 | 7.12E-13 | 6.26E-11 |
| ENSG00000188338 | SLC38A3   | -1.61E+00 | 9.22E-13 | 8.02E-11 |
| ENSG00000105516 | DBP       | -2.29E+00 | 2.75E-12 | 2.31E-10 |
| ENSG00000100889 | PCK2      | -1.20E+00 | 3.01E-12 | 2.52E-10 |
| ENSG00000138496 | PARP9     | -1.50E+00 | 8.77E-12 | 7.02E-10 |
| ENSG00000163565 | IFI16     | -1.14E+00 | 1.00E-11 | 7.95E-10 |
| ENSG00000169242 | EFNA1     | -1.32E+00 | 1.15E-11 | 9.06E-10 |
| ENSG00000100439 | ABHD4     | -1.36E+00 | 1.96E-11 | 1.49E-09 |
| ENSG00000185630 | PBX1      | -1.67E+00 | 2.03E-11 | 1.54E-09 |
| ENSG00000108370 | RGS9      | -3.65E+00 | 3.09E-11 | 2.30E-09 |
| ENSG00000023892 | DEF6      | -2.17E+00 | 3.94E-11 | 2.89E-09 |
| ENSG00000197757 | HOXC6     | -1.42E+00 | 6.84E-11 | 4.88E-09 |
| ENSG00000163683 | SMIM14    | -1.34E+00 | 1.08E-10 | 7.33E-09 |
| ENSG00000196535 | MYO18A    | -1.28E+00 | 1.13E-10 | 7.64E-09 |
| ENSG00000176046 | NUPR1     | -1.55E+00 | 1.21E-10 | 8.11E-09 |
| ENSG00000177732 | SOX12     | -1.02E+00 | 1.69E-10 | 1.11E-08 |
| ENSG00000166548 | TK2       | -1.28E+00 | 2.83E-10 | 1.81E-08 |
| ENSG00000169783 | LINGO1    | -2.31E+00 | 3.29E-10 | 2.09E-08 |
| ENSG00000175182 | FAM131A   | -1.52E+00 | 3.44E-10 | 2.17E-08 |
| ENSG00000112655 | PTK7      | -1.05E+00 | 3.63E-10 | 2.28E-08 |
| ENSG00000068137 | PLEKHH3   | -1.49E+00 | 5.22E-10 | 3.19E-08 |
| ENSG00000117280 | RAB29     | -1.01E+00 | 5.53E-10 | 3.36E-08 |
| ENSG00000113721 | PDGFRB    | -1.15E+00 | 5.79E-10 | 3.50E-08 |
| ENSG00000167680 | SEMA6B    | -1.22E+00 | 8.13E-10 | 4.76E-08 |
| ENSG00000175938 | ORAI3     | -1.97E+00 | 9.32E-10 | 5.39E-08 |
| ENSG00000132563 | REEP2     | -1.85E+00 | 1.22E-09 | 6.97E-08 |
| ENSG00000125378 | BMP4      | -1.91E+00 | 1.39E-09 | 7.81E-08 |
| ENSG00000182606 | TRAK1     | -1.22E+00 | 1.72E-09 | 9.39E-08 |
| ENSG00000105559 | PLEKHA4   | -1.33E+00 | 2.26E-09 | 1.21E-07 |
| ENSG00000162733 | DDR2      | -1.08E+00 | 2.28E-09 | 1.21E-07 |
| ENSG00000141480 | ARRB2     | -1.14E+00 | 2.31E-09 | 1.22E-07 |
| ENSG00000185909 | KLHDC8B   | -1.12E+00 | 2.46E-09 | 1.30E-07 |
| ENSG00000173917 | HOXB2     | -1.11E+00 | 3.59E-09 | 1.83E-07 |

|                 |           |           |          |          |
|-----------------|-----------|-----------|----------|----------|
| ENSG00000021355 | SERPINB1  | -1.34E+00 | 4.28E-09 | 2.14E-07 |
| ENSG00000137171 | KLC4      | -1.30E+00 | 4.40E-09 | 2.19E-07 |
| ENSG00000164237 | CMBL      | -1.34E+00 | 5.47E-09 | 2.69E-07 |
| ENSG00000108509 | CAMTA2    | -1.17E+00 | 5.52E-09 | 2.71E-07 |
| ENSG00000180340 | FZD2      | -1.32E+00 | 5.79E-09 | 2.81E-07 |
| ENSG00000103485 | QPRT      | -1.24E+00 | 8.81E-09 | 4.15E-07 |
| ENSG00000173706 | HEG1      | -1.06E+00 | 1.19E-08 | 5.51E-07 |
| ENSG00000115596 | WNT6      | -1.88E+00 | 1.26E-08 | 5.80E-07 |
| ENSG00000140044 | JDP2      | -1.80E+00 | 1.51E-08 | 6.81E-07 |
| ENSG00000133466 | C1QTNF6   | -1.19E+00 | 1.67E-08 | 7.45E-07 |
| ENSG00000074370 | ATP2A3    | -1.94E+00 | 1.86E-08 | 8.29E-07 |
| ENSG00000167107 | ACSF2     | -1.16E+00 | 1.86E-08 | 8.29E-07 |
| ENSG00000265972 | TXNIP     | -2.01E+00 | 1.99E-08 | 8.78E-07 |
| ENSG00000141524 | TMC6      | -1.54E+00 | 2.79E-08 | 1.18E-06 |
| ENSG00000165424 | ZCCHC24   | -1.06E+00 | 2.83E-08 | 1.19E-06 |
| ENSG00000095321 | CRAT      | -1.33E+00 | 2.90E-08 | 1.21E-06 |
| ENSG00000090661 | CERS4     | -1.70E+00 | 2.94E-08 | 1.23E-06 |
| ENSG00000115325 | DOK1      | -1.50E+00 | 3.53E-08 | 1.45E-06 |
| ENSG00000065361 | ERBB3     | -2.83E+00 | 3.98E-08 | 1.63E-06 |
| ENSG00000157514 | TSC22D3   | -1.78E+00 | 4.15E-08 | 1.69E-06 |
| ENSG00000162062 | TEDC2     | -1.03E+00 | 4.53E-08 | 1.82E-06 |
| ENSG00000160447 | PKN3      | -1.98E+00 | 4.59E-08 | 1.84E-06 |
| ENSG00000109654 | TRIM2     | -1.45E+00 | 4.93E-08 | 1.96E-06 |
| ENSG00000160325 | CACFD1    | -1.58E+00 | 4.99E-08 | 1.98E-06 |
| ENSG00000157978 | LDLRAP1   | -1.05E+00 | 5.86E-08 | 2.29E-06 |
| ENSG00000226137 | BAIAP2-DT | -1.76E+00 | 7.17E-08 | 2.74E-06 |
| ENSG00000223802 | CERS1     | -1.12E+00 | 7.70E-08 | 2.92E-06 |
| ENSG00000178685 | PARP10    | -1.42E+00 | 8.82E-08 | 3.23E-06 |
| ENSG00000088367 | EPB41L1   | -1.08E+00 | 1.16E-07 | 4.19E-06 |
| ENSG00000064195 | DLX3      | -1.75E+00 | 1.20E-07 | 4.28E-06 |
| ENSG00000168913 | ENHO      | -1.70E+00 | 1.31E-07 | 4.65E-06 |
| ENSG00000233913 | RPL10P9   | -1.33E+00 | 1.66E-07 | 5.78E-06 |
| ENSG00000010295 | IFFO1     | -1.11E+00 | 1.69E-07 | 5.85E-06 |
| ENSG00000166963 | MAP1A     | -1.71E+00 | 1.72E-07 | 5.93E-06 |
| ENSG00000197183 | NOL4L     | -1.04E+00 | 1.72E-07 | 5.93E-06 |
| ENSG00000001461 | NIPAL3    | -1.27E+00 | 1.73E-07 | 5.94E-06 |
| ENSG00000015532 | XYLT2     | -1.13E+00 | 1.73E-07 | 5.94E-06 |
| ENSG00000269609 | RPARP-AS1 | -1.56E+00 | 2.31E-07 | 7.72E-06 |
| ENSG00000005882 | PDK2      | -1.15E+00 | 2.34E-07 | 7.79E-06 |
| ENSG00000268621 | IGFL2-AS1 | -3.62E+00 | 2.52E-07 | 8.33E-06 |
| ENSG00000182272 | B4GALNT4  | -1.04E+00 | 2.78E-07 | 9.11E-06 |
| ENSG00000010361 | FUZ       | -1.60E+00 | 2.83E-07 | 9.22E-06 |
| ENSG00000064300 | NGFR      | -1.35E+00 | 3.30E-07 | 1.07E-05 |
| ENSG00000158555 | GDPD5     | -1.27E+00 | 3.37E-07 | 1.08E-05 |
| ENSG00000175264 | CHST1     | -2.29E+00 | 3.54E-07 | 1.13E-05 |

|                 |           |           |          |          |
|-----------------|-----------|-----------|----------|----------|
| ENSG00000161888 | SPC24     | -1.10E+00 | 3.92E-07 | 1.25E-05 |
| ENSG00000160703 | NLRX1     | -1.54E+00 | 4.22E-07 | 1.33E-05 |
| ENSG00000172731 | LRRC20    | -2.05E+00 | 4.33E-07 | 1.36E-05 |
| ENSG00000072195 | SPEG      | -1.58E+00 | 4.35E-07 | 1.36E-05 |
| ENSG00000100065 | CARD10    | -1.02E+00 | 4.50E-07 | 1.41E-05 |
| ENSG00000133056 | PIK3C2B   | -1.89E+00 | 4.86E-07 | 1.50E-05 |
| ENSG00000143590 | EFNA3     | -1.55E+00 | 4.95E-07 | 1.53E-05 |
| ENSG00000082497 | SERTAD4   | -2.29E+00 | 7.66E-07 | 2.29E-05 |
| ENSG00000124313 | IQSEC2    | -1.47E+00 | 8.49E-07 | 2.52E-05 |
| ENSG00000132024 | CC2D1A    | -1.00E+00 | 9.26E-07 | 2.73E-05 |
| ENSG00000111981 | ULBP1     | -1.28E+00 | 1.01E-06 | 2.96E-05 |
| ENSG00000029534 | ANK1      | -1.62E+00 | 1.10E-06 | 3.19E-05 |
| ENSG00000010310 | GIPR      | -4.23E+00 | 1.11E-06 | 3.19E-05 |
| ENSG00000115718 | PROC      | -4.81E+00 | 1.13E-06 | 3.24E-05 |
| ENSG00000168528 | SERINC2   | -1.23E+00 | 1.13E-06 | 3.24E-05 |
| ENSG00000090238 | YPEL3     | -1.44E+00 | 1.24E-06 | 3.52E-05 |
| ENSG00000165113 | GKAP1     | -1.33E+00 | 1.24E-06 | 3.52E-05 |
| ENSG00000181790 | ADGRB1    | -1.36E+00 | 1.24E-06 | 3.52E-05 |
| ENSG00000131196 | NFATC1    | -1.26E+00 | 1.36E-06 | 3.79E-05 |
| ENSG00000147130 | ZMYM3     | -1.02E+00 | 1.48E-06 | 4.12E-05 |
| ENSG00000168792 | ABHD15    | -1.18E+00 | 1.63E-06 | 4.48E-05 |
| ENSG00000226742 | HSBP1L1   | -2.14E+00 | 1.80E-06 | 4.91E-05 |
| ENSG00000182580 | EPHB3     | -1.47E+00 | 1.84E-06 | 5.01E-05 |
| ENSG00000174446 | SNAPC5    | -1.28E+00 | 1.90E-06 | 5.16E-05 |
| ENSG00000198468 | FLVCR1-DT | -1.27E+00 | 1.96E-06 | 5.30E-05 |
| ENSG00000178821 | TMEM52    | -2.27E+00 | 2.14E-06 | 5.74E-05 |
| ENSG00000185561 | TLCD2     | -1.27E+00 | 2.30E-06 | 6.11E-05 |
| ENSG00000149573 | MPZL2     | -4.00E+00 | 2.34E-06 | 6.20E-05 |
| ENSG00000104081 | BMF       | -1.77E+00 | 2.55E-06 | 6.71E-05 |
| ENSG00000158106 | RHPN1     | -1.63E+00 | 3.08E-06 | 7.93E-05 |
| ENSG00000138735 | PDE5A     | -2.05E+00 | 3.28E-06 | 8.41E-05 |
| ENSG00000147138 | GPR174    | -2.34E+01 | 3.70E-06 | 9.40E-05 |
| ENSG00000131018 | SYNE1     | -1.14E+00 | 3.96E-06 | 1.00E-04 |
| ENSG00000163694 | RBM47     | -1.19E+00 | 4.01E-06 | 1.01E-04 |
| ENSG00000081923 | ATP8B1    | -1.33E+00 | 4.16E-06 | 1.05E-04 |
| ENSG00000144857 | BOC       | -1.65E+00 | 4.28E-06 | 1.07E-04 |
| ENSG00000205517 | RGL3      | -1.77E+00 | 4.30E-06 | 1.07E-04 |
| ENSG00000073331 | ALPK1     | -2.05E+00 | 4.53E-06 | 1.12E-04 |
| ENSG00000165716 | DIPK1B    | -1.24E+00 | 4.61E-06 | 1.14E-04 |
| ENSG00000090971 | NAT14     | -1.12E+00 | 5.12E-06 | 1.25E-04 |
| ENSG00000090006 | LTBP4     | -1.27E+00 | 5.29E-06 | 1.29E-04 |
| ENSG00000099864 | PALM      | -1.46E+00 | 5.34E-06 | 1.30E-04 |
| ENSG00000111913 | RIPOR2    | -2.65E+00 | 5.79E-06 | 1.39E-04 |
| ENSG00000130775 | THEMIS2   | -1.43E+00 | 5.86E-06 | 1.40E-04 |
| ENSG00000110237 | ARHGEF17  | -1.46E+00 | 5.97E-06 | 1.43E-04 |

|                 |            |           |          |          |
|-----------------|------------|-----------|----------|----------|
| ENSG00000123815 | COQ8B      | -1.31E+00 | 6.17E-06 | 1.47E-04 |
| ENSG00000167771 | RCOR2      | -2.17E+00 | 6.52E-06 | 1.54E-04 |
| ENSG00000137463 | MGARP      | -1.61E+00 | 6.94E-06 | 1.63E-04 |
| ENSG00000127220 | ABHD8      | -1.36E+00 | 7.08E-06 | 1.66E-04 |
| ENSG00000162738 | VANGL2     | -1.16E+00 | 7.71E-06 | 1.79E-04 |
| ENSG00000158246 | TENT5B     | -1.30E+00 | 7.91E-06 | 1.82E-04 |
| ENSG00000181404 | WASHC1     | -1.28E+00 | 7.90E-06 | 1.82E-04 |
| ENSG00000256982 | AC135782.1 | -3.90E+00 | 8.07E-06 | 1.85E-04 |
| ENSG00000139219 | COL2A1     | -3.55E+00 | 8.62E-06 | 1.98E-04 |
| ENSG00000185745 | IFIT1      | -2.09E+00 | 9.73E-06 | 2.19E-04 |
| ENSG00000126603 | GLIS2      | -1.18E+00 | 9.87E-06 | 2.22E-04 |
| ENSG00000249042 | AC008771.1 | -1.30E+00 | 9.90E-06 | 2.22E-04 |
| ENSG00000139269 | INHBE      | -2.71E+00 | 1.05E-05 | 2.33E-04 |
| ENSG00000135929 | CYP27A1    | -1.10E+00 | 1.06E-05 | 2.34E-04 |
| ENSG00000102886 | GDPD3      | -2.24E+00 | 1.10E-05 | 2.41E-04 |
| ENSG00000184117 | NIPSNAP1   | -1.02E+00 | 1.14E-05 | 2.49E-04 |
| ENSG00000177679 | SRRM3      | -1.74E+00 | 1.17E-05 | 2.55E-04 |
| ENSG00000146411 | SLC2A12    | -4.63E+00 | 1.21E-05 | 2.62E-04 |
| ENSG00000121851 | POLR3GL    | -1.34E+00 | 1.23E-05 | 2.65E-04 |
| ENSG00000167861 | HID1       | -4.04E+00 | 1.34E-05 | 2.86E-04 |
| ENSG00000167536 | DHRS13     | -1.65E+00 | 1.36E-05 | 2.90E-04 |
| ENSG00000176244 | ACBD7      | -1.27E+00 | 1.38E-05 | 2.94E-04 |
| ENSG00000196132 | MYT1       | -4.20E+00 | 1.44E-05 | 3.05E-04 |
| ENSG00000170271 | FAXDC2     | -2.45E+00 | 1.65E-05 | 3.45E-04 |
| ENSG00000180818 | HOXC10     | -1.07E+00 | 1.72E-05 | 3.55E-04 |
| ENSG00000157657 | ZNF618     | -1.02E+00 | 1.78E-05 | 3.67E-04 |
| ENSG00000236618 | PITPNA-AS1 | -1.23E+00 | 1.82E-05 | 3.75E-04 |
| ENSG00000247675 | LRP4-AS1   | -2.81E+00 | 1.88E-05 | 3.85E-04 |
| ENSG00000062822 | POLD1      | -1.47E+00 | 1.89E-05 | 3.86E-04 |
| ENSG00000140853 | NLRC5      | -1.12E+00 | 1.90E-05 | 3.88E-04 |
| ENSG00000104413 | ESRP1      | -3.98E+00 | 1.97E-05 | 4.01E-04 |
| ENSG00000115525 | ST3GAL5    | -1.38E+00 | 1.98E-05 | 4.02E-04 |
| ENSG00000154102 | C16orf74   | -2.40E+00 | 1.99E-05 | 4.04E-04 |
| ENSG00000171119 | NRTN       | -1.14E+00 | 2.03E-05 | 4.11E-04 |
| ENSG00000111077 | TNS2       | -1.23E+00 | 2.15E-05 | 4.31E-04 |
| ENSG00000170899 | GSTA4      | -2.22E+00 | 2.18E-05 | 4.38E-04 |
| ENSG00000128268 | MGAT3      | -1.34E+00 | 2.19E-05 | 4.39E-04 |
| ENSG00000013016 | EHD3       | -1.69E+00 | 2.50E-05 | 4.94E-04 |
| ENSG00000092051 | JPH4       | -3.83E+00 | 2.60E-05 | 5.11E-04 |
| ENSG00000107821 | KAZALD1    | -1.63E+00 | 2.71E-05 | 5.29E-04 |
| ENSG00000143891 | GALM       | -1.12E+00 | 2.78E-05 | 5.40E-04 |
| ENSG00000167600 | CYP2S1     | -1.04E+00 | 2.81E-05 | 5.45E-04 |
| ENSG00000283498 | MIR1244-2  | -1.60E+00 | 2.83E-05 | 5.47E-04 |
| ENSG00000047230 | CTPS2      | -1.08E+00 | 3.01E-05 | 5.77E-04 |
| ENSG00000124641 | MED20      | -1.21E+00 | 3.07E-05 | 5.88E-04 |

|                 |            |           |          |          |
|-----------------|------------|-----------|----------|----------|
| ENSG00000166823 | MESP1      | -1.86E+00 | 3.23E-05 | 6.14E-04 |
| ENSG00000159871 | LYPD5      | -2.39E+00 | 3.26E-05 | 6.18E-04 |
| ENSG00000121281 | ADCY7      | -1.64E+00 | 3.60E-05 | 6.76E-04 |
| ENSG00000104892 | KLC3       | -1.13E+00 | 3.72E-05 | 6.95E-04 |
| ENSG00000172346 | CSDC2      | -1.78E+00 | 3.77E-05 | 7.01E-04 |
| ENSG00000088280 | ASAP3      | -1.67E+00 | 3.93E-05 | 7.25E-04 |
| ENSG00000259768 | AC004943.2 | -1.80E+00 | 4.00E-05 | 7.37E-04 |
| ENSG00000132846 | ZBED3      | -1.56E+00 | 4.33E-05 | 7.93E-04 |
| ENSG00000183671 | GPR1       | -3.61E+00 | 4.42E-05 | 8.05E-04 |
| ENSG00000076826 | CAMSAP3    | -1.89E+00 | 4.44E-05 | 8.07E-04 |
| ENSG00000275342 | PRAG1      | -1.06E+00 | 4.51E-05 | 8.17E-04 |
| ENSG00000115297 | TLX2       | -2.34E+00 | 4.76E-05 | 8.52E-04 |
| ENSG00000117305 | HMGCL      | -1.10E+00 | 4.94E-05 | 8.82E-04 |
| ENSG00000162599 | NFIA       | -1.16E+00 | 4.98E-05 | 8.88E-04 |
| ENSG00000177868 | SVBP       | -1.03E+00 | 5.23E-05 | 9.28E-04 |
| ENSG00000130475 | FCHO1      | -3.05E+00 | 5.49E-05 | 9.68E-04 |
| ENSG00000176909 | MAMSTR     | -1.31E+00 | 5.58E-05 | 9.80E-04 |
| ENSG00000177570 | SAMD12     | -2.50E+00 | 5.65E-05 | 9.88E-04 |
| ENSG00000130517 | PGPEP1     | -1.25E+00 | 5.68E-05 | 9.90E-04 |
| ENSG00000142082 | SIRT3      | -1.45E+00 | 5.74E-05 | 9.99E-04 |
| ENSG00000167157 | PRRX2      | -1.09E+00 | 5.86E-05 | 1.01E-03 |
| ENSG00000179292 | TMEM151A   | -1.76E+00 | 6.06E-05 | 1.04E-03 |
| ENSG00000176428 | VPS37D     | -1.67E+00 | 6.25E-05 | 1.07E-03 |
| ENSG00000213347 | MXD3       | -1.09E+00 | 6.46E-05 | 1.10E-03 |
| ENSG00000074964 | ARHGEF10L  | -1.16E+00 | 6.62E-05 | 1.12E-03 |
| ENSG00000040341 | STAU2      | -1.02E+00 | 6.81E-05 | 1.15E-03 |
| ENSG00000106789 | CORO2A     | -1.28E+00 | 7.34E-05 | 1.23E-03 |
| ENSG00000180902 | D2HGDH     | -1.06E+00 | 7.44E-05 | 1.24E-03 |
| ENSG00000148225 | WDR31      | -2.23E+00 | 7.55E-05 | 1.26E-03 |
| ENSG00000072163 | LIMS2      | -1.36E+00 | 7.77E-05 | 1.28E-03 |
| ENSG00000204084 | INPP5B     | -1.26E+00 | 8.47E-05 | 1.38E-03 |
| ENSG00000104967 | NOVA2      | -3.78E+00 | 8.80E-05 | 1.42E-03 |
| ENSG00000105514 | RAB3D      | -1.61E+00 | 8.85E-05 | 1.43E-03 |
| ENSG00000169499 | PLEKHA2    | -1.16E+00 | 9.14E-05 | 1.47E-03 |
| ENSG00000171227 | TMEM37     | -4.39E+00 | 9.16E-05 | 1.47E-03 |
| ENSG00000197943 | PLCG2      | -1.70E+00 | 9.24E-05 | 1.48E-03 |
| ENSG00000135119 | RNFT2      | -1.03E+00 | 9.58E-05 | 1.52E-03 |
| ENSG00000085871 | MGST2      | -1.31E+00 | 9.94E-05 | 1.58E-03 |
| ENSG00000171992 | SYNPO      | -1.35E+00 | 9.95E-05 | 1.58E-03 |
| ENSG00000184986 | TMEM121    | -1.25E+00 | 1.00E-04 | 1.58E-03 |
| ENSG00000187730 | GABRD      | -2.04E+00 | 1.03E-04 | 1.61E-03 |
| ENSG00000116990 | MYCL       | -2.53E+00 | 1.06E-04 | 1.66E-03 |
| ENSG00000073350 | LLGL2      | -1.25E+00 | 1.08E-04 | 1.68E-03 |
| ENSG00000122756 | CNTFR      | -1.71E+00 | 1.11E-04 | 1.72E-03 |
| ENSG00000108984 | MAP2K6     | -2.61E+00 | 1.11E-04 | 1.72E-03 |

|                 |           |           |          |          |
|-----------------|-----------|-----------|----------|----------|
| ENSG00000160271 | RALGDS    | -1.10E+00 | 1.11E-04 | 1.72E-03 |
| ENSG00000025434 | NR1H3     | -1.38E+00 | 1.16E-04 | 1.78E-03 |
| ENSG00000163449 | TMEM169   | -4.06E+00 | 1.30E-04 | 1.95E-03 |
| ENSG00000159184 | HOXB13    | -1.58E+00 | 1.31E-04 | 1.96E-03 |
| ENSG00000056998 | GYG2      | -2.41E+00 | 1.35E-04 | 2.01E-03 |
| ENSG00000146828 | SLC12A9   | -1.02E+00 | 1.35E-04 | 2.01E-03 |
| ENSG00000108309 | RUNDC3A   | -3.39E+00 | 1.37E-04 | 2.03E-03 |
| ENSG00000203883 | SOX18     | -2.12E+00 | 1.40E-04 | 2.07E-03 |
| ENSG00000184058 | TBX1      | -1.10E+00 | 1.45E-04 | 2.14E-03 |
| ENSG00000179772 | FOXS1     | -2.44E+00 | 1.50E-04 | 2.19E-03 |
| ENSG00000115468 | EFHD1     | -1.02E+00 | 1.53E-04 | 2.23E-03 |
| ENSG00000143375 | CGN       | -1.48E+00 | 1.55E-04 | 2.25E-03 |
| ENSG00000065357 | DGKA      | -1.05E+00 | 1.56E-04 | 2.25E-03 |
| ENSG00000154889 | MPPE1     | -1.11E+00 | 1.57E-04 | 2.27E-03 |
| ENSG00000225783 | MIAT      | -2.04E+00 | 1.61E-04 | 2.32E-03 |
| ENSG00000109686 | SH3D19    | -1.01E+00 | 1.67E-04 | 2.38E-03 |
| ENSG00000103024 | NME3      | -1.18E+00 | 1.68E-04 | 2.40E-03 |
| ENSG00000198435 | NRARP     | -1.01E+00 | 1.69E-04 | 2.41E-03 |
| ENSG00000100307 | CBX7      | -1.79E+00 | 1.70E-04 | 2.41E-03 |
| ENSG00000132000 | PODNL1    | -1.23E+00 | 1.71E-04 | 2.43E-03 |
| ENSG00000235823 | OLMALINC  | -1.07E+00 | 1.72E-04 | 2.44E-03 |
| ENSG00000130720 | FIBCD1    | -1.86E+00 | 1.73E-04 | 2.45E-03 |
| ENSG00000147251 | DOCK11    | -1.07E+00 | 1.79E-04 | 2.52E-03 |
| ENSG00000234965 | SHISA8    | -1.34E+00 | 1.84E-04 | 2.58E-03 |
| ENSG00000076864 | RAP1GAP   | -1.66E+00 | 1.87E-04 | 2.61E-03 |
| ENSG00000169129 | AFAP1L2   | -1.38E+00 | 1.87E-04 | 2.62E-03 |
| ENSG00000164056 | SPRY1     | -1.84E+00 | 1.88E-04 | 2.63E-03 |
| ENSG00000185361 | TNFAIP8L1 | -1.28E+00 | 1.89E-04 | 2.64E-03 |
| ENSG00000159224 | GIP       | -3.61E+00 | 1.91E-04 | 2.66E-03 |
| ENSG00000211584 | SLC48A1   | -1.40E+00 | 1.97E-04 | 2.73E-03 |
| ENSG00000154930 | ACSS1     | -1.25E+00 | 2.01E-04 | 2.77E-03 |
| ENSG00000101695 | RNF125    | -3.50E+00 | 2.04E-04 | 2.80E-03 |
| ENSG00000163485 | ADORA1    | -2.16E+00 | 2.06E-04 | 2.83E-03 |
| ENSG00000118960 | HS1BP3    | -1.36E+00 | 2.14E-04 | 2.92E-03 |
| ENSG00000166821 | PEX11A    | -1.24E+00 | 2.19E-04 | 2.96E-03 |
| ENSG00000128965 | CHAC1     | -1.23E+00 | 2.19E-04 | 2.97E-03 |
| ENSG00000185432 | METTL7A   | -2.14E+00 | 2.34E-04 | 3.14E-03 |
| ENSG00000257698 | GIHCG     | -1.09E+00 | 2.40E-04 | 3.21E-03 |
| ENSG00000205978 | NYNRIN    | -2.51E+00 | 2.58E-04 | 3.42E-03 |
| ENSG00000137834 | SMAD6     | -1.68E+00 | 2.62E-04 | 3.45E-03 |
| ENSG00000186889 | TMEM17    | -1.61E+00 | 2.72E-04 | 3.56E-03 |
| ENSG00000179284 | DAND5     | -3.69E+00 | 2.76E-04 | 3.59E-03 |
| ENSG00000106004 | HOXA5     | -1.22E+00 | 2.80E-04 | 3.63E-03 |
| ENSG00000198189 | HSD17B11  | -1.12E+00 | 2.80E-04 | 3.64E-03 |
| ENSG00000119408 | NEK6      | -1.01E+00 | 2.93E-04 | 3.78E-03 |



|                 |            |           |          |          |
|-----------------|------------|-----------|----------|----------|
| ENSG00000009950 | MLXIPL     | -4.19E+00 | 2.96E-04 | 3.81E-03 |
| ENSG00000100918 | REC8       | -2.28E+00 | 2.97E-04 | 3.82E-03 |
| ENSG00000117016 | RIMS3      | -2.24E+00 | 3.00E-04 | 3.84E-03 |
| ENSG00000184785 | SMIM10     | -1.82E+00 | 3.00E-04 | 3.85E-03 |
| ENSG00000264148 | AC138207.3 | -3.58E+00 | 3.02E-04 | 3.87E-03 |
| ENSG00000104903 | LYL1       | -2.25E+00 | 3.38E-04 | 4.25E-03 |
| ENSG00000052850 | ALX4       | -1.50E+00 | 3.39E-04 | 4.26E-03 |
| ENSG00000253552 | HOXA-AS2   | -1.60E+00 | 3.41E-04 | 4.28E-03 |
| ENSG00000138172 | CALHM2     | -1.39E+00 | 3.56E-04 | 4.45E-03 |
| ENSG00000079385 | CEACAM1    | -2.34E+00 | 3.59E-04 | 4.47E-03 |
| ENSG00000170412 | GPRC5C     | -1.07E+00 | 3.68E-04 | 4.55E-03 |
| ENSG00000111271 | ACAD10     | -1.21E+00 | 3.71E-04 | 4.59E-03 |
| ENSG00000166839 | ANKDD1A    | -1.13E+00 | 3.97E-04 | 4.83E-03 |
| ENSG00000198624 | CCDC69     | -1.72E+00 | 4.02E-04 | 4.89E-03 |
| ENSG00000186897 | C1QL4      | -1.39E+00 | 4.06E-04 | 4.93E-03 |
| ENSG00000137700 | SLC37A4    | -1.22E+00 | 4.21E-04 | 5.08E-03 |
| ENSG00000161082 | CELF5      | -2.63E+00 | 4.22E-04 | 5.08E-03 |
| ENSG00000116983 | HPCAL4     | -1.82E+00 | 4.35E-04 | 5.21E-03 |
| ENSG00000120068 | HOXB8      | -3.18E+00 | 4.38E-04 | 5.23E-03 |
| ENSG00000165959 | CLMN       | -1.32E+00 | 4.40E-04 | 5.24E-03 |
| ENSG00000135622 | SEMA4F     | -1.21E+00 | 4.49E-04 | 5.33E-03 |
| ENSG00000196502 | SULT1A1    | -1.46E+00 | 4.51E-04 | 5.34E-03 |
| ENSG00000143554 | SLC27A3    | -1.64E+00 | 4.57E-04 | 5.41E-03 |
| ENSG00000160796 | NBEAL2     | -1.34E+00 | 4.62E-04 | 5.45E-03 |
| ENSG00000165757 | JCAD       | -1.13E+00 | 4.63E-04 | 5.45E-03 |
| ENSG00000174640 | SLCO2A1    | -1.05E+00 | 4.64E-04 | 5.47E-03 |
| ENSG00000130052 | STARD8     | -1.49E+00 | 4.71E-04 | 5.54E-03 |
| ENSG00000119782 | FKBP1B     | -1.56E+00 | 4.78E-04 | 5.61E-03 |
| ENSG00000164330 | EBF1       | -1.37E+00 | 4.78E-04 | 5.62E-03 |
| ENSG00000062282 | DGAT2      | -1.06E+00 | 4.85E-04 | 5.67E-03 |
| ENSG00000148219 | ASTN2      | -1.65E+00 | 4.90E-04 | 5.73E-03 |
| ENSG00000130270 | ATP8B3     | -1.45E+00 | 4.94E-04 | 5.76E-03 |
| ENSG00000174516 | PELI3      | -1.23E+00 | 5.04E-04 | 5.86E-03 |
| ENSG00000204128 | C2orf72    | -1.33E+00 | 5.04E-04 | 5.86E-03 |
| ENSG00000171695 | LKAAEAR1   | -2.03E+00 | 5.06E-04 | 5.87E-03 |
| ENSG00000101222 | SPEF1      | -1.53E+00 | 5.19E-04 | 6.00E-03 |
| ENSG00000268041 | ERFL       | -1.88E+00 | 5.24E-04 | 6.04E-03 |
| ENSG00000105289 | TJP3       | -3.40E+00 | 5.31E-04 | 6.11E-03 |
| ENSG00000239887 | C1orf226   | -2.26E+00 | 5.56E-04 | 6.37E-03 |
| ENSG00000066735 | KIF26A     | -1.09E+00 | 5.81E-04 | 6.63E-03 |
| ENSG00000147689 | FAM83A     | -2.79E+00 | 5.89E-04 | 6.70E-03 |
| ENSG00000169750 | RAC3       | -1.04E+00 | 5.97E-04 | 6.79E-03 |
| ENSG00000166813 | KIF7       | -1.33E+00 | 6.33E-04 | 7.13E-03 |
| ENSG00000104888 | SLC17A7    | -1.15E+00 | 6.40E-04 | 7.20E-03 |
| ENSG00000163958 | ZDHHC19    | -2.23E+00 | 6.49E-04 | 7.28E-03 |

|                 |            |           |          |          |
|-----------------|------------|-----------|----------|----------|
| ENSG00000125746 | EML2       | -2.10E+00 | 6.56E-04 | 7.36E-03 |
| ENSG00000120696 | KBTBD7     | -1.11E+00 | 6.64E-04 | 7.43E-03 |
| ENSG00000164088 | PPM1M      | -1.30E+00 | 6.75E-04 | 7.53E-03 |
| ENSG00000283632 | EXOC3L2    | -3.33E+00 | 6.95E-04 | 7.73E-03 |
| ENSG00000144908 | ALDH1L1    | -1.96E+00 | 7.06E-04 | 7.83E-03 |
| ENSG00000188493 | C19orf54   | -1.22E+00 | 7.21E-04 | 7.96E-03 |
| ENSG00000108813 | DLX4       | -1.75E+00 | 7.25E-04 | 7.99E-03 |
| ENSG00000249669 | CARMN      | -1.03E+00 | 7.51E-04 | 8.22E-03 |
| ENSG00000105875 | WDR91      | -1.05E+00 | 7.65E-04 | 8.34E-03 |
| ENSG00000063180 | CA11       | -1.04E+00 | 7.85E-04 | 8.52E-03 |
| ENSG00000117266 | CDK18      | -1.43E+00 | 8.05E-04 | 8.71E-03 |
| ENSG00000157601 | MX1        | -2.50E+00 | 8.07E-04 | 8.71E-03 |
| ENSG00000287356 | AL590822.3 | -1.71E+00 | 8.07E-04 | 8.71E-03 |
| ENSG00000161277 | THAP8      | -1.37E+00 | 8.48E-04 | 9.03E-03 |
| ENSG00000148842 | CNNM2      | -1.00E+00 | 8.55E-04 | 9.08E-03 |
| ENSG00000232412 | AL121601.1 | -3.70E+00 | 8.90E-04 | 9.36E-03 |
| ENSG00000152527 | PLEKHH2    | -1.76E+00 | 8.97E-04 | 9.42E-03 |
| ENSG00000177674 | AGTRAP     | -1.09E+00 | 9.13E-04 | 9.54E-03 |
| ENSG00000258616 | LINC02303  | -3.47E+00 | 9.24E-04 | 9.61E-03 |
| ENSG00000250786 | SNHG18     | -1.22E+00 | 9.32E-04 | 9.68E-03 |
| ENSG00000245849 | RAD51-AS1  | -1.50E+00 | 9.98E-04 | 1.02E-02 |
| ENSG00000272288 | AL451165.2 | -1.89E+00 | 1.01E-03 | 1.03E-02 |
| ENSG00000124507 | PACSIN1    | -3.86E+00 | 1.02E-03 | 1.04E-02 |
| ENSG00000178935 | ZNF552     | -1.55E+00 | 1.02E-03 | 1.04E-02 |
| ENSG00000101098 | RIMS4      | -3.57E+00 | 1.04E-03 | 1.05E-02 |
| ENSG00000164124 | TMEM144    | -1.60E+00 | 1.07E-03 | 1.08E-02 |
| ENSG00000183196 | CHST6      | -1.12E+00 | 1.10E-03 | 1.11E-02 |
| ENSG00000102984 | ZNF821     | -1.09E+00 | 1.13E-03 | 1.13E-02 |
| ENSG00000177465 | ACOT4      | -1.78E+00 | 1.15E-03 | 1.14E-02 |
| ENSG00000168517 | HEXIM2     | -1.08E+00 | 1.15E-03 | 1.15E-02 |
| ENSG00000007516 | BAIAP3     | -1.56E+00 | 1.18E-03 | 1.17E-02 |
| ENSG00000003249 | DBNDD1     | -1.37E+00 | 1.21E-03 | 1.20E-02 |
| ENSG00000100246 | DNAL4      | -1.03E+00 | 1.23E-03 | 1.21E-02 |
| ENSG00000120093 | HOXB3      | -1.01E+00 | 1.23E-03 | 1.21E-02 |
| ENSG00000164620 | RELL2      | -1.00E+00 | 1.23E-03 | 1.21E-02 |
| ENSG00000198933 | TBKBP1     | -1.37E+00 | 1.23E-03 | 1.21E-02 |
| ENSG00000228451 | SDAD1P1    | -1.27E+00 | 1.23E-03 | 1.21E-02 |
| ENSG00000128596 | CCDC136    | -1.37E+00 | 1.24E-03 | 1.22E-02 |
| ENSG00000203739 | AL645568.1 | -1.68E+00 | 1.26E-03 | 1.23E-02 |
| ENSG00000185920 | PTCH1      | -1.55E+00 | 1.27E-03 | 1.24E-02 |
| ENSG00000105642 | KCNN1      | -1.96E+00 | 1.32E-03 | 1.28E-02 |
| ENSG00000153208 | MERTK      | -1.93E+00 | 1.32E-03 | 1.28E-02 |
| ENSG00000128011 | LRFN1      | -1.46E+00 | 1.35E-03 | 1.30E-02 |
| ENSG00000286156 | AC026273.1 | -1.29E+00 | 1.38E-03 | 1.33E-02 |
| ENSG00000189195 | BTBD8      | -1.42E+00 | 1.44E-03 | 1.37E-02 |

|                 |            |           |          |          |
|-----------------|------------|-----------|----------|----------|
| ENSG00000006468 | ETV1       | -3.74E+00 | 1.45E-03 | 1.37E-02 |
| ENSG00000169220 | RGS14      | -1.29E+00 | 1.46E-03 | 1.39E-02 |
| ENSG00000185187 | SIGIRR     | -1.02E+00 | 1.46E-03 | 1.39E-02 |
| ENSG00000197180 | AC244090.1 | -1.62E+00 | 1.47E-03 | 1.39E-02 |
| ENSG00000135709 | KIAA0513   | -1.15E+00 | 1.49E-03 | 1.41E-02 |
| ENSG00000168916 | ZNF608     | -1.13E+00 | 1.50E-03 | 1.42E-02 |
| ENSG00000143409 | MINDY1     | -2.12E+00 | 1.52E-03 | 1.43E-02 |
| ENSG00000175793 | SFN        | -2.91E+00 | 1.63E-03 | 1.51E-02 |
| ENSG00000163704 | PRRT3      | -1.31E+00 | 1.65E-03 | 1.53E-02 |
| ENSG00000267221 | C17orf113  | -2.84E+00 | 1.66E-03 | 1.53E-02 |
| ENSG00000105146 | AURKC      | -1.87E+00 | 1.68E-03 | 1.55E-02 |
| ENSG00000235954 | TTC28-AS1  | -1.09E+00 | 1.69E-03 | 1.55E-02 |
| ENSG00000234719 | NPIPB2     | -2.57E+00 | 1.71E-03 | 1.57E-02 |
| ENSG00000054392 | HHAT       | -1.13E+00 | 1.73E-03 | 1.58E-02 |
| ENSG00000180739 | S1PR5      | -1.01E+00 | 1.73E-03 | 1.58E-02 |
| ENSG00000221955 | SLC12A8    | -1.47E+00 | 1.74E-03 | 1.59E-02 |
| ENSG00000197766 | CFD        | -2.07E+00 | 1.75E-03 | 1.60E-02 |
| ENSG00000171160 | MORN4      | -1.01E+00 | 1.77E-03 | 1.62E-02 |
| ENSG00000205363 | INSYN1     | -1.69E+00 | 1.78E-03 | 1.62E-02 |
| ENSG00000007968 | E2F2       | -1.18E+00 | 1.80E-03 | 1.64E-02 |
| ENSG00000175084 | DES        | -2.53E+00 | 1.80E-03 | 1.64E-02 |
| ENSG00000239213 | NCK1-DT    | -1.39E+00 | 1.80E-03 | 1.64E-02 |
| ENSG00000074317 | SNCB       | -1.57E+00 | 1.81E-03 | 1.64E-02 |
| ENSG00000105664 | COMP       | -2.10E+00 | 1.81E-03 | 1.64E-02 |
| ENSG00000105613 | MAST1      | -1.56E+00 | 1.87E-03 | 1.68E-02 |
| ENSG00000138606 | SHF        | -1.06E+00 | 1.89E-03 | 1.69E-02 |
| ENSG00000159733 | ZFYVE28    | -2.59E+00 | 1.91E-03 | 1.70E-02 |
| ENSG00000106948 | AKNA       | -1.16E+00 | 1.92E-03 | 1.71E-02 |
| ENSG00000226471 | Z93930.2   | -3.14E+00 | 1.93E-03 | 1.72E-02 |
| ENSG00000171747 | LGALS4     | -2.84E+00 | 1.96E-03 | 1.73E-02 |
| ENSG00000131037 | EPS8L1     | -1.14E+00 | 1.96E-03 | 1.74E-02 |
| ENSG00000095539 | SEMA4G     | -1.00E+00 | 1.97E-03 | 1.74E-02 |
| ENSG00000174804 | FZD4       | -1.57E+00 | 2.07E-03 | 1.82E-02 |
| ENSG00000124615 | MOCS1      | -1.07E+00 | 2.12E-03 | 1.85E-02 |
| ENSG00000119227 | PIGZ       | -2.26E+00 | 2.13E-03 | 1.86E-02 |
| ENSG00000104490 | NCALD      | -2.12E+00 | 2.17E-03 | 1.89E-02 |
| ENSG00000267390 | AC036176.1 | -2.33E+00 | 2.21E-03 | 1.92E-02 |
| ENSG00000006606 | CCL26      | -2.10E+00 | 2.24E-03 | 1.94E-02 |
| ENSG00000188624 | IGFL3      | -3.99E+00 | 2.30E-03 | 1.98E-02 |
| ENSG00000226445 | BX322234.1 | -1.23E+00 | 2.32E-03 | 1.99E-02 |
| ENSG00000287263 | AC008875.3 | -1.34E+00 | 2.34E-03 | 2.00E-02 |
| ENSG00000280734 | LINC01232  | -1.71E+00 | 2.40E-03 | 2.05E-02 |
| ENSG00000243244 | STON1      | -1.52E+00 | 2.44E-03 | 2.07E-02 |
| ENSG00000233493 | TMEM238    | -2.16E+00 | 2.44E-03 | 2.07E-02 |
| ENSG00000162040 | HS3ST6     | -2.65E+00 | 2.46E-03 | 2.09E-02 |

|                 |            |           |          |          |
|-----------------|------------|-----------|----------|----------|
| ENSG00000116254 | CHD5       | -2.24E+00 | 2.48E-03 | 2.10E-02 |
| ENSG00000196951 | SCOC-AS1   | -1.48E+00 | 2.48E-03 | 2.10E-02 |
| ENSG00000185065 | AC000068.1 | -2.21E+00 | 2.52E-03 | 2.13E-02 |
| ENSG00000196605 | ZNF846     | -1.70E+00 | 2.54E-03 | 2.14E-02 |
| ENSG00000168490 | PHYHIP     | -1.56E+00 | 2.55E-03 | 2.14E-02 |
| ENSG00000237595 | LINC01275  | -3.31E+00 | 2.61E-03 | 2.18E-02 |
| ENSG00000180448 | ARHGAP45   | -1.82E+00 | 2.67E-03 | 2.22E-02 |
| ENSG00000257337 | AC068888.1 | -3.68E+00 | 2.69E-03 | 2.23E-02 |
| ENSG00000005961 | ITGA2B     | -1.25E+00 | 2.69E-03 | 2.23E-02 |
| ENSG00000144712 | CAND2      | -2.68E+00 | 2.73E-03 | 2.25E-02 |
| ENSG00000089692 | LAG3       | -1.40E+00 | 2.77E-03 | 2.28E-02 |
| ENSG00000281128 | PTENP1-AS  | -1.37E+00 | 2.81E-03 | 2.31E-02 |
| ENSG00000267280 | TBX2-AS1   | -1.55E+00 | 2.84E-03 | 2.32E-02 |
| ENSG00000106689 | LHX2       | -1.02E+00 | 2.86E-03 | 2.34E-02 |
| ENSG00000126106 | TMEM53     | -1.21E+00 | 2.87E-03 | 2.35E-02 |
| ENSG00000269246 | AC011445.2 | -2.35E+00 | 2.89E-03 | 2.36E-02 |
| ENSG00000105538 | RASIP1     | -2.77E+00 | 2.92E-03 | 2.37E-02 |
| ENSG00000135736 | CCDC102A   | -1.05E+00 | 2.92E-03 | 2.37E-02 |
| ENSG00000182175 | RGMA       | -2.88E+00 | 2.94E-03 | 2.38E-02 |
| ENSG00000103528 | SYT17      | -2.88E+00 | 2.99E-03 | 2.42E-02 |
| ENSG00000166473 | PKD1L2     | -2.90E+00 | 3.03E-03 | 2.44E-02 |
| ENSG00000110076 | NRXN2      | -1.54E+00 | 3.10E-03 | 2.49E-02 |
| ENSG00000266010 | GATA6-AS1  | -2.08E+00 | 3.14E-03 | 2.52E-02 |
| ENSG00000064687 | ABCA7      | -1.06E+00 | 3.17E-03 | 2.53E-02 |
| ENSG00000175567 | UCP2       | -1.28E+00 | 3.17E-03 | 2.53E-02 |
| ENSG00000213023 | SYT3       | -2.19E+00 | 3.20E-03 | 2.55E-02 |
| ENSG00000102935 | ZNF423     | -1.14E+00 | 3.26E-03 | 2.59E-02 |
| ENSG00000214796 | AC098934.1 | -1.41E+00 | 3.29E-03 | 2.62E-02 |
| ENSG00000204282 | TNRC6C-AS1 | -3.04E+00 | 3.32E-03 | 2.63E-02 |
| ENSG00000066248 | NGEF       | -1.40E+00 | 3.34E-03 | 2.65E-02 |
| ENSG00000269388 | AC018755.3 | -2.20E+00 | 3.34E-03 | 2.65E-02 |
| ENSG00000247081 | BAALC-AS1  | -1.89E+00 | 3.35E-03 | 2.65E-02 |
| ENSG00000213930 | GALT       | -1.02E+00 | 3.38E-03 | 2.67E-02 |
| ENSG00000270049 | AC009061.2 | -1.53E+00 | 3.39E-03 | 2.68E-02 |
| ENSG00000169418 | NPR1       | -3.44E+00 | 3.43E-03 | 2.70E-02 |
| ENSG00000224940 | PRRT4      | -1.94E+00 | 3.44E-03 | 2.71E-02 |
| ENSG00000171817 | ZNF540     | -2.40E+00 | 3.45E-03 | 2.71E-02 |
| ENSG00000006534 | ALDH3B1    | -1.12E+00 | 3.46E-03 | 2.72E-02 |
| ENSG00000233521 | LINC01638  | -1.34E+00 | 3.46E-03 | 2.72E-02 |
| ENSG00000288093 | AL592295.5 | -2.08E+00 | 3.48E-03 | 2.73E-02 |
| ENSG00000278376 | AP004609.3 | -2.19E+00 | 3.49E-03 | 2.74E-02 |
| ENSG00000268119 | AC010615.2 | -2.02E+00 | 3.55E-03 | 2.76E-02 |
| ENSG00000248508 | SRP14-AS1  | -1.66E+00 | 3.55E-03 | 2.77E-02 |
| ENSG00000160097 | FNDC5      | -1.54E+00 | 3.63E-03 | 2.81E-02 |
| ENSG00000188385 | JAKMIP3    | -2.39E+00 | 3.66E-03 | 2.82E-02 |

|                 |            |           |          |          |
|-----------------|------------|-----------|----------|----------|
| ENSG00000170296 | GABARAP    | -1.53E+00 | 3.67E-03 | 2.83E-02 |
| ENSG00000135519 | KCNH3      | -1.59E+00 | 3.69E-03 | 2.84E-02 |
| ENSG00000188176 | SMTNL2     | -3.00E+00 | 3.71E-03 | 2.86E-02 |
| ENSG00000004777 | ARHGAP33   | -1.21E+00 | 3.73E-03 | 2.87E-02 |
| ENSG00000228126 | FALEC      | -1.96E+00 | 3.75E-03 | 2.88E-02 |
| ENSG00000140968 | IRF8       | -2.52E+00 | 3.76E-03 | 2.89E-02 |
| ENSG00000196391 | ZNF774     | -1.82E+00 | 3.77E-03 | 2.89E-02 |
| ENSG00000068831 | RASGRP2    | -2.09E+00 | 3.78E-03 | 2.90E-02 |
| ENSG00000242732 | RTL5       | -1.93E+00 | 3.80E-03 | 2.91E-02 |
| ENSG00000260086 | AC007611.1 | -3.27E+00 | 3.83E-03 | 2.93E-02 |
| ENSG00000204498 | NFKBIL1    | -1.09E+00 | 3.85E-03 | 2.94E-02 |
| ENSG00000186862 | PDZD7      | -2.42E+00 | 3.88E-03 | 2.96E-02 |
| ENSG00000100228 | RAB36      | -1.00E+00 | 3.89E-03 | 2.96E-02 |
| ENSG00000196917 | HCAR1      | -2.55E+00 | 3.90E-03 | 2.97E-02 |
| ENSG00000196517 | SLC6A9     | -1.01E+00 | 3.98E-03 | 3.01E-02 |
| ENSG00000099617 | EFNA2      | -1.02E+00 | 4.01E-03 | 3.03E-02 |
| ENSG00000269416 | LINC01224  | -2.02E+00 | 4.01E-03 | 3.03E-02 |
| ENSG00000204685 | STARD7-AS1 | -1.38E+00 | 4.03E-03 | 3.04E-02 |
| ENSG00000105655 | ISYNA1     | -1.05E+00 | 4.10E-03 | 3.08E-02 |
| ENSG00000243926 | TIPARP-AS1 | -2.86E+00 | 4.10E-03 | 3.08E-02 |
| ENSG00000153157 | SYCP2L     | -1.33E+00 | 4.11E-03 | 3.08E-02 |
| ENSG00000187867 | PALM3      | -1.45E+00 | 4.13E-03 | 3.09E-02 |
| ENSG00000074047 | GLI2       | -1.16E+00 | 4.16E-03 | 3.11E-02 |
| ENSG00000162881 | OXER1      | -2.33E+00 | 4.19E-03 | 3.12E-02 |
| ENSG00000105251 | SHD        | -2.90E+00 | 4.31E-03 | 3.19E-02 |
| ENSG00000245571 | FAM111A-DT | -1.86E+00 | 4.34E-03 | 3.21E-02 |
| ENSG00000153896 | ZNF599     | -1.07E+00 | 4.35E-03 | 3.21E-02 |
| ENSG00000117643 | MAN1C1     | -1.49E+00 | 4.35E-03 | 3.21E-02 |
| ENSG00000244459 | AC147067.1 | -3.28E+00 | 4.47E-03 | 3.29E-02 |
| ENSG00000228109 | MELTF-AS1  | -1.10E+00 | 4.52E-03 | 3.32E-02 |
| ENSG00000230513 | THAP7-AS1  | -2.26E+00 | 4.56E-03 | 3.34E-02 |
| ENSG00000245275 | SAP30L-AS1 | -2.37E+00 | 4.57E-03 | 3.34E-02 |
| ENSG00000185669 | SNAI3      | -3.31E+00 | 4.57E-03 | 3.34E-02 |
| ENSG00000179477 | ALOX12B    | -2.52E+00 | 4.63E-03 | 3.38E-02 |
| ENSG00000260442 | ATP2A1-AS1 | -1.04E+00 | 4.63E-03 | 3.38E-02 |
| ENSG00000155849 | ELMO1      | -2.86E+00 | 4.78E-03 | 3.47E-02 |
| ENSG00000135299 | ANKRD6     | -1.22E+00 | 4.79E-03 | 3.48E-02 |
| ENSG00000228701 | TNKS2-AS1  | -2.39E+00 | 4.84E-03 | 3.51E-02 |
| ENSG00000225511 | LINC00475  | -2.43E+00 | 4.90E-03 | 3.55E-02 |
| ENSG00000143178 | TBX19      | -3.43E+00 | 5.10E-03 | 3.66E-02 |
| ENSG00000106633 | GCK        | -2.02E+00 | 5.12E-03 | 3.67E-02 |
| ENSG00000159214 | CCDC24     | -1.53E+00 | 5.17E-03 | 3.70E-02 |
| ENSG00000187699 | C2orf88    | -2.14E+00 | 5.20E-03 | 3.72E-02 |
| ENSG00000255624 | AC073585.1 | -2.31E+00 | 5.21E-03 | 3.72E-02 |
| ENSG00000133246 | PRAM1      | -3.53E+00 | 5.21E-03 | 3.73E-02 |

|                 |            |           |          |          |
|-----------------|------------|-----------|----------|----------|
| ENSG00000155816 | FMN2       | -3.05E+00 | 5.26E-03 | 3.76E-02 |
| ENSG00000126016 | AMOT       | -1.86E+00 | 5.29E-03 | 3.78E-02 |
| ENSG00000119922 | IFIT2      | -1.16E+00 | 5.29E-03 | 3.78E-02 |
| ENSG00000125895 | TMEM74B    | -1.51E+00 | 5.32E-03 | 3.79E-02 |
| ENSG00000228801 | AC064807.1 | -1.25E+00 | 5.34E-03 | 3.80E-02 |
| ENSG00000122986 | HVCN1      | -3.56E+00 | 5.34E-03 | 3.80E-02 |
| ENSG00000231711 | LINC00899  | -1.63E+00 | 5.36E-03 | 3.81E-02 |
| ENSG00000215883 | CYB5RL     | -1.31E+00 | 5.45E-03 | 3.85E-02 |
| ENSG00000143355 | LHX9       | -3.25E+00 | 5.49E-03 | 3.87E-02 |
| ENSG00000170293 | CMTM8      | -1.18E+00 | 5.51E-03 | 3.88E-02 |
| ENSG00000188092 | GPR89B     | -1.04E+00 | 5.63E-03 | 3.94E-02 |
| ENSG00000106852 | LHX6       | -1.77E+00 | 5.70E-03 | 3.98E-02 |
| ENSG00000130304 | SLC27A1    | -1.15E+00 | 5.72E-03 | 4.00E-02 |
| ENSG00000079215 | SLC1A3     | -1.83E+00 | 5.74E-03 | 4.01E-02 |
| ENSG00000137959 | IFI44L     | -1.60E+00 | 5.79E-03 | 4.03E-02 |
| ENSG00000197776 | KLHDC1     | -3.63E+00 | 5.79E-03 | 4.03E-02 |
| ENSG00000173762 | CD7        | -2.61E+00 | 5.87E-03 | 4.08E-02 |
| ENSG00000139174 | PRICKLE1   | -1.53E+00 | 5.88E-03 | 4.08E-02 |
| ENSG00000255100 | AP003119.2 | -2.64E+00 | 5.98E-03 | 4.14E-02 |
| ENSG00000154079 | SDHAF4     | -1.15E+00 | 6.01E-03 | 4.16E-02 |
| ENSG00000178623 | GPR35      | -2.50E+00 | 6.05E-03 | 4.18E-02 |
| ENSG00000182853 | VMO1       | -2.39E+00 | 6.11E-03 | 4.21E-02 |
| ENSG00000140481 | CCDC33     | -1.81E+00 | 6.16E-03 | 4.23E-02 |
| ENSG00000166405 | RIC3       | -3.62E+00 | 6.17E-03 | 4.24E-02 |
| ENSG00000163794 | UCN        | -2.74E+00 | 6.21E-03 | 4.26E-02 |
| ENSG00000095370 | SH2D3C     | -2.84E+00 | 6.23E-03 | 4.26E-02 |
| ENSG00000185862 | EVI2B      | -3.68E+00 | 6.33E-03 | 4.32E-02 |
| ENSG00000130294 | KIF1A      | -2.60E+00 | 6.34E-03 | 4.33E-02 |
| ENSG00000167676 | PLIN4      | -1.99E+00 | 6.38E-03 | 4.34E-02 |
| ENSG00000132517 | SLC52A1    | -2.56E+00 | 6.44E-03 | 4.38E-02 |
| ENSG00000243225 | AC007686.1 | -1.39E+00 | 6.75E-03 | 4.54E-02 |
| ENSG00000162849 | KIF26B     | -1.83E+00 | 6.76E-03 | 4.54E-02 |
| ENSG00000181240 | SLC25A41   | -3.32E+00 | 6.82E-03 | 4.56E-02 |
| ENSG00000014914 | MTMR11     | -1.18E+00 | 6.83E-03 | 4.57E-02 |
| ENSG00000130433 | CACNG6     | -2.14E+00 | 6.88E-03 | 4.60E-02 |
| ENSG00000214456 | PLIN5      | -3.55E+00 | 6.91E-03 | 4.61E-02 |
| ENSG00000250654 | AC023794.4 | -1.56E+00 | 7.04E-03 | 4.68E-02 |
| ENSG00000167799 | NUDT8      | -1.12E+00 | 7.10E-03 | 4.70E-02 |
| ENSG00000117245 | KIF17      | -3.23E+00 | 7.18E-03 | 4.74E-02 |
| ENSG00000162878 | PKDCC      | -1.27E+00 | 7.31E-03 | 4.80E-02 |
| ENSG00000181444 | ZNF467     | -3.42E+00 | 7.32E-03 | 4.81E-02 |
| ENSG00000248593 | DSTNP2     | -1.12E+00 | 7.41E-03 | 4.85E-02 |
| ENSG00000076555 | ACACB      | -1.57E+00 | 7.50E-03 | 4.89E-02 |
| ENSG00000242498 | ARPIN      | -1.04E+00 | 7.55E-03 | 4.91E-02 |
| ENSG00000272172 | AC138696.2 | -2.75E+00 | 7.57E-03 | 4.92E-02 |

|                 |         |           |          |          |
|-----------------|---------|-----------|----------|----------|
| ENSG00000204789 | ZNF204P | -1.56E+00 | 7.58E-03 | 4.93E-02 |
| ENSG00000122735 | DNAI1   | -3.56E+00 | 7.60E-03 | 4.93E-02 |
| ENSG00000099954 | CECR2   | -1.54E+00 | 7.62E-03 | 4.94E-02 |
| ENSG00000158164 | TMSB15A | -1.33E+00 | 7.68E-03 | 4.97E-02 |

**Supplementary table 5. Significant URGs with versus without IL-1 $\beta$  stimulation in Ad-EGFP transduced samples.**

| Gene ID         | Gene name | Log2(FC) | P value  | FDR      |
|-----------------|-----------|----------|----------|----------|
| ENSG00000124875 | CXCL6     | 5.42E+00 | 6.55E-99 | 9.62E-95 |
| ENSG00000128342 | LIF       | 3.09E+00 | 2.18E-66 | 1.60E-62 |
| ENSG00000163739 | CXCL1     | 8.00E+00 | 7.41E-58 | 3.63E-54 |
| ENSG00000163734 | CXCL3     | 5.80E+00 | 2.87E-57 | 1.05E-53 |
| ENSG00000081041 | CXCL2     | 5.35E+00 | 6.99E-55 | 2.05E-51 |
| ENSG00000122641 | INHBA     | 2.68E+00 | 9.34E-53 | 2.29E-49 |
| ENSG00000163661 | PTX3      | 3.23E+00 | 1.05E-51 | 2.19E-48 |
| ENSG00000169429 | CXCL8     | 7.76E+00 | 5.85E-51 | 1.07E-47 |
| ENSG00000108342 | CSF3      | 1.02E+01 | 3.58E-47 | 5.85E-44 |
| ENSG00000105835 | NAMPT     | 1.63E+00 | 9.22E-45 | 1.35E-41 |
| ENSG00000108179 | PPIF      | 1.60E+00 | 1.76E-43 | 2.35E-40 |
| ENSG00000145555 | MYO10     | 1.58E+00 | 2.69E-42 | 3.29E-39 |
| ENSG00000073756 | PTGS2     | 5.33E+00 | 3.28E-42 | 3.70E-39 |
| ENSG00000112096 | SOD2      | 2.95E+00 | 3.53E-42 | 3.70E-39 |
| ENSG00000124102 | PI3       | 6.03E+00 | 4.71E-41 | 4.61E-38 |
| ENSG00000163874 | ZC3H12A   | 2.84E+00 | 1.52E-38 | 1.39E-35 |
| ENSG00000137745 | MMP13     | 2.90E+00 | 2.08E-37 | 1.70E-34 |
| ENSG00000145901 | TNIP1     | 1.58E+00 | 8.28E-36 | 6.40E-33 |
| ENSG00000138685 | FGF2      | 1.79E+00 | 2.22E-35 | 1.63E-32 |
| ENSG00000185215 | TNFAIP2   | 1.87E+00 | 3.54E-35 | 2.48E-32 |
| ENSG00000104635 | SLC39A14  | 1.75E+00 | 4.52E-33 | 3.02E-30 |
| ENSG00000133657 | ATP13A3   | 1.33E+00 | 6.96E-33 | 4.44E-30 |
| ENSG00000144802 | NFKBIZ    | 2.27E+00 | 3.35E-32 | 2.05E-29 |
| ENSG00000072274 | TFRC      | 1.05E+00 | 7.20E-32 | 4.23E-29 |
| ENSG00000124145 | SDC4      | 1.45E+00 | 4.55E-29 | 2.57E-26 |
| ENSG00000136244 | IL6       | 4.66E+00 | 1.30E-27 | 7.09E-25 |
| ENSG00000197632 | SERPINB2  | 5.95E+00 | 2.15E-27 | 1.13E-24 |
| ENSG00000173391 | OLR1      | 4.48E+00 | 7.38E-27 | 3.74E-24 |
| ENSG00000090339 | ICAM1     | 2.10E+00 | 2.17E-26 | 1.06E-23 |
| ENSG00000147454 | SLC25A37  | 1.43E+00 | 1.13E-25 | 5.34E-23 |
| ENSG00000095752 | IL11      | 2.35E+00 | 1.19E-25 | 5.48E-23 |
| ENSG00000113070 | HBEGF     | 1.73E+00 | 1.49E-25 | 6.64E-23 |
| ENSG00000115009 | CCL20     | 6.51E+00 | 1.63E-24 | 7.03E-22 |
| ENSG00000184254 | ALDH1A3   | 1.37E+00 | 3.33E-24 | 1.40E-21 |
| ENSG00000118257 | NRP2      | 2.39E+00 | 2.27E-23 | 9.24E-21 |
| ENSG00000034152 | MAP2K3    | 1.16E+00 | 1.21E-22 | 4.80E-20 |
| ENSG00000165732 | DDX21     | 1.05E+00 | 2.82E-22 | 1.09E-19 |
| ENSG00000159200 | RCAN1     | 1.86E+00 | 1.60E-21 | 6.03E-19 |
| ENSG00000114251 | WNT5A     | 1.14E+00 | 5.49E-21 | 1.97E-18 |
| ENSG00000137331 | IER3      | 2.23E+00 | 9.05E-20 | 3.09E-17 |
| ENSG00000135919 | SERPINE2  | 1.19E+00 | 2.13E-19 | 7.12E-17 |
| ENSG00000185022 | MAFF      | 2.00E+00 | 7.58E-19 | 2.48E-16 |
| ENSG00000137801 | THBS1     | 1.26E+00 | 8.09E-19 | 2.58E-16 |



|                 |          |          |          |          |
|-----------------|----------|----------|----------|----------|
| ENSG00000125538 | IL1B     | 5.22E+00 | 1.36E-18 | 4.25E-16 |
| ENSG00000172156 | CCL11    | 2.92E+00 | 2.82E-18 | 8.62E-16 |
| ENSG00000101384 | JAG1     | 1.07E+00 | 3.21E-18 | 9.43E-16 |
| ENSG00000162692 | VCAM1    | 1.21E+00 | 4.11E-18 | 1.19E-15 |
| ENSG00000164400 | CSF2     | 6.76E+00 | 4.90E-18 | 1.38E-15 |
| ENSG00000108691 | CCL2     | 2.17E+00 | 5.52E-18 | 1.53E-15 |
| ENSG00000026508 | CD44     | 1.87E+00 | 2.01E-17 | 5.26E-15 |
| ENSG00000115756 | HPCAL1   | 1.60E+00 | 2.46E-17 | 6.34E-15 |
| ENSG00000182197 | EXT1     | 1.03E+00 | 4.38E-17 | 1.11E-14 |
| ENSG00000134070 | IRAK2    | 1.84E+00 | 8.50E-17 | 2.12E-14 |
| ENSG00000104419 | NDRG1    | 1.35E+00 | 1.59E-16 | 3.88E-14 |
| ENSG00000157168 | NRG1     | 1.53E+00 | 1.75E-16 | 4.22E-14 |
| ENSG00000117228 | GBP1     | 1.10E+00 | 2.63E-16 | 6.24E-14 |
| ENSG00000056558 | TRAF1    | 2.52E+00 | 9.10E-16 | 2.09E-13 |
| ENSG00000134954 | ETS1     | 1.17E+00 | 1.29E-15 | 2.90E-13 |
| ENSG00000173918 | C1QTNF1  | 2.49E+00 | 1.30E-15 | 2.90E-13 |
| ENSG00000255112 | CHMP1B   | 1.08E+00 | 7.00E-15 | 1.51E-12 |
| ENSG00000176597 | B3GNT5   | 1.24E+00 | 7.61E-15 | 1.62E-12 |
| ENSG00000182752 | PAPPA    | 2.21E+00 | 9.10E-15 | 1.91E-12 |
| ENSG00000125148 | MT2A     | 2.38E+00 | 1.87E-14 | 3.82E-12 |
| ENSG00000133816 | MICAL2   | 1.17E+00 | 4.27E-14 | 8.48E-12 |
| ENSG00000118515 | SGK1     | 1.07E+00 | 5.12E-14 | 1.00E-11 |
| ENSG00000125430 | HS3ST3B1 | 3.00E+00 | 6.83E-14 | 1.32E-11 |
| ENSG00000105855 | ITGB8    | 2.26E+00 | 8.22E-14 | 1.55E-11 |
| ENSG00000028277 | POU2F2   | 1.92E+00 | 1.02E-13 | 1.87E-11 |
| ENSG00000154127 | UBASH3B  | 1.06E+00 | 2.19E-13 | 3.84E-11 |
| ENSG00000164465 | DCBLD1   | 1.07E+00 | 4.88E-13 | 8.25E-11 |
| ENSG00000249992 | TMEM158  | 1.82E+00 | 5.00E-13 | 8.35E-11 |
| ENSG00000150630 | VEGFC    | 1.57E+00 | 7.13E-13 | 1.15E-10 |
| ENSG00000092969 | TGFB2    | 1.09E+00 | 8.64E-13 | 1.36E-10 |
| ENSG00000196878 | LAMB3    | 1.80E+00 | 9.04E-13 | 1.41E-10 |
| ENSG00000100985 | MMP9     | 2.25E+00 | 9.91E-13 | 1.52E-10 |
| ENSG00000170017 | ALCAM    | 1.17E+00 | 1.09E-12 | 1.64E-10 |
| ENSG00000105974 | CAV1     | 1.40E+00 | 2.69E-12 | 3.87E-10 |
| ENSG00000174136 | RGMB     | 1.76E+00 | 2.73E-12 | 3.89E-10 |
| ENSG00000133639 | BTG1     | 1.07E+00 | 3.47E-12 | 4.86E-10 |
| ENSG00000132334 | PTPRE    | 1.24E+00 | 7.37E-12 | 1.01E-09 |
| ENSG00000144749 | LRIG1    | 1.13E+00 | 8.59E-12 | 1.15E-09 |
| ENSG00000131459 | GFPT2    | 1.12E+00 | 9.46E-12 | 1.24E-09 |
| ENSG00000177606 | JUN      | 1.11E+00 | 1.15E-11 | 1.50E-09 |
| ENSG00000075426 | FOSL2    | 1.09E+00 | 1.62E-11 | 2.01E-09 |
| ENSG00000106366 | SERPINE1 | 1.39E+00 | 1.63E-11 | 2.01E-09 |
| ENSG00000167034 | NKX3-1   | 1.35E+00 | 1.80E-11 | 2.18E-09 |
| ENSG00000110330 | BIRC2    | 1.15E+00 | 2.22E-11 | 2.68E-09 |
| ENSG00000164171 | ITGA2    | 1.83E+00 | 2.67E-11 | 3.13E-09 |

|                 |          |          |          |          |
|-----------------|----------|----------|----------|----------|
| ENSG00000117525 | F3       | 1.32E+00 | 3.01E-11 | 3.51E-09 |
| ENSG00000102755 | FLT1     | 1.54E+00 | 1.15E-10 | 1.22E-08 |
| ENSG00000128564 | VGF      | 2.06E+00 | 1.32E-10 | 1.39E-08 |
| ENSG00000118503 | TNFAIP3  | 1.49E+00 | 1.57E-10 | 1.65E-08 |
| ENSG00000163814 | CDCP1    | 1.26E+00 | 1.60E-10 | 1.67E-08 |
| ENSG00000197208 | SLC22A4  | 2.02E+00 | 2.11E-10 | 2.16E-08 |
| ENSG00000146648 | EGFR     | 1.25E+00 | 3.39E-10 | 3.38E-08 |
| ENSG00000020577 | SAMD4A   | 1.48E+00 | 5.08E-10 | 5.01E-08 |
| ENSG00000115594 | IL1R1    | 1.21E+00 | 5.25E-10 | 5.15E-08 |
| ENSG00000052749 | RRP12    | 1.07E+00 | 5.33E-10 | 5.18E-08 |
| ENSG00000148841 | ITPRIP   | 1.30E+00 | 6.30E-10 | 6.09E-08 |
| ENSG00000175592 | FOSL1    | 1.29E+00 | 8.67E-10 | 8.27E-08 |
| ENSG00000169594 | BNC1     | 2.07E+00 | 1.07E-09 | 1.01E-07 |
| ENSG00000102802 | MEDAG    | 2.79E+00 | 1.16E-09 | 1.07E-07 |
| ENSG00000049192 | ADAMTS6  | 1.50E+00 | 1.46E-09 | 1.33E-07 |
| ENSG00000170961 | HAS2     | 1.89E+00 | 1.67E-09 | 1.51E-07 |
| ENSG00000049249 | TNFRSF9  | 1.53E+00 | 1.69E-09 | 1.52E-07 |
| ENSG00000100234 | TIMP3    | 1.04E+00 | 1.79E-09 | 1.60E-07 |
| ENSG00000067798 | NAV3     | 1.53E+00 | 4.36E-09 | 3.77E-07 |
| ENSG00000184545 | DUSP8    | 1.45E+00 | 4.34E-09 | 3.77E-07 |
| ENSG00000177283 | FZD8     | 2.65E+00 | 4.46E-09 | 3.83E-07 |
| ENSG00000133101 | CCNA1    | 2.02E+00 | 4.63E-09 | 3.93E-07 |
| ENSG00000128422 | KRT17    | 1.31E+00 | 7.78E-09 | 6.38E-07 |
| ENSG00000128567 | PODXL    | 1.14E+00 | 8.55E-09 | 6.98E-07 |
| ENSG00000181649 | PHLDA2   | 1.20E+00 | 1.07E-08 | 8.48E-07 |
| ENSG00000077238 | IL4R     | 1.37E+00 | 1.24E-08 | 9.57E-07 |
| ENSG00000125266 | EFNB2    | 1.08E+00 | 1.48E-08 | 1.14E-06 |
| ENSG00000107249 | GLIS3    | 1.36E+00 | 1.95E-08 | 1.45E-06 |
| ENSG00000103888 | CEMIP    | 1.41E+00 | 2.04E-08 | 1.49E-06 |
| ENSG00000111252 | SH2B3    | 1.17E+00 | 2.04E-08 | 1.49E-06 |
| ENSG00000100739 | BDKRB1   | 1.91E+00 | 2.19E-08 | 1.59E-06 |
| ENSG00000003402 | CFLAR    | 1.05E+00 | 2.32E-08 | 1.67E-06 |
| ENSG00000074416 | MGLL     | 1.79E+00 | 2.49E-08 | 1.79E-06 |
| ENSG00000085117 | CD82     | 1.02E+00 | 2.99E-08 | 2.09E-06 |
| ENSG00000164251 | F2RL1    | 1.83E+00 | 3.21E-08 | 2.23E-06 |
| ENSG00000041982 | TNC      | 1.39E+00 | 3.44E-08 | 2.37E-06 |
| ENSG00000008513 | ST3GAL1  | 1.07E+00 | 4.28E-08 | 2.91E-06 |
| ENSG00000139318 | DUSP6    | 1.40E+00 | 4.41E-08 | 2.97E-06 |
| ENSG00000157557 | ETS2     | 1.19E+00 | 4.45E-08 | 2.99E-06 |
| ENSG00000225614 | ZNF469   | 1.18E+00 | 4.98E-08 | 3.31E-06 |
| ENSG00000023445 | BIRC3    | 1.73E+00 | 5.11E-08 | 3.38E-06 |
| ENSG00000031081 | ARHGAP31 | 1.40E+00 | 5.18E-08 | 3.40E-06 |
| ENSG00000162645 | GBP2     | 1.66E+00 | 5.83E-08 | 3.76E-06 |
| ENSG00000130066 | SAT1     | 1.14E+00 | 1.06E-07 | 6.67E-06 |
| ENSG00000160072 | ATAD3B   | 1.08E+00 | 1.13E-07 | 7.12E-06 |

|                 |            |          |          |          |
|-----------------|------------|----------|----------|----------|
| ENSG00000146592 | CREB5      | 2.13E+00 | 2.06E-07 | 1.21E-05 |
| ENSG00000159399 | HK2        | 1.43E+00 | 2.06E-07 | 1.21E-05 |
| ENSG00000010818 | HIVEP2     | 1.16E+00 | 2.51E-07 | 1.43E-05 |
| ENSG00000144655 | CSRNP1     | 1.06E+00 | 2.57E-07 | 1.46E-05 |
| ENSG00000168685 | IL7R       | 1.40E+00 | 2.75E-07 | 1.55E-05 |
| ENSG00000163347 | CLDN1      | 2.29E+00 | 3.03E-07 | 1.68E-05 |
| ENSG00000013619 | MAMLD1     | 1.97E+00 | 3.48E-07 | 1.90E-05 |
| ENSG00000123610 | TNFAIP6    | 1.21E+00 | 3.73E-07 | 2.02E-05 |
| ENSG00000187678 | SPRY4      | 1.44E+00 | 4.96E-07 | 2.61E-05 |
| ENSG00000115363 | EVA1A      | 2.04E+00 | 7.28E-07 | 3.77E-05 |
| ENSG00000163297 | ANTXR2     | 1.21E+00 | 7.56E-07 | 3.90E-05 |
| ENSG00000164619 | BMPER      | 3.09E+00 | 8.36E-07 | 4.25E-05 |
| ENSG00000159167 | STC1       | 1.46E+00 | 1.03E-06 | 5.12E-05 |
| ENSG00000138623 | SEMA7A     | 1.22E+00 | 1.19E-06 | 5.81E-05 |
| ENSG00000197635 | DPP4       | 1.38E+00 | 1.83E-06 | 8.48E-05 |
| ENSG00000120899 | PTK2B      | 2.13E+00 | 2.62E-06 | 1.18E-04 |
| ENSG00000137449 | CPEB2      | 1.59E+00 | 3.02E-06 | 1.34E-04 |
| ENSG00000069482 | GAL        | 1.06E+00 | 3.07E-06 | 1.36E-04 |
| ENSG00000066583 | ISOC1      | 1.13E+00 | 3.30E-06 | 1.44E-04 |
| ENSG00000139289 | PHLDA1     | 1.51E+00 | 3.32E-06 | 1.45E-04 |
| ENSG00000129932 | DOHH       | 1.16E+00 | 3.43E-06 | 1.48E-04 |
| ENSG00000134531 | EMP1       | 1.25E+00 | 3.65E-06 | 1.56E-04 |
| ENSG00000139211 | AMIGO2     | 1.24E+00 | 4.52E-06 | 1.90E-04 |
| ENSG00000186340 | THBS2      | 1.11E+00 | 6.25E-06 | 2.47E-04 |
| ENSG00000143816 | WNT9A      | 2.89E+00 | 7.05E-06 | 2.74E-04 |
| ENSG00000156463 | SH3RF2     | 1.83E+00 | 7.26E-06 | 2.81E-04 |
| ENSG00000133805 | AMPD3      | 1.92E+00 | 8.45E-06 | 3.17E-04 |
| ENSG00000151012 | SLC7A11    | 1.07E+00 | 8.68E-06 | 3.23E-04 |
| ENSG00000232949 | AC002480.2 | 3.13E+00 | 9.60E-06 | 3.54E-04 |
| ENSG00000171889 | MIR31HG    | 1.98E+00 | 1.14E-05 | 4.07E-04 |
| ENSG00000011422 | PLAUR      | 1.15E+00 | 1.20E-05 | 4.25E-04 |
| ENSG00000171724 | VAT1L      | 1.06E+00 | 1.21E-05 | 4.26E-04 |
| ENSG00000166923 | GREM1      | 1.60E+00 | 1.21E-05 | 4.28E-04 |
| ENSG00000087510 | TFAP2C     | 1.01E+00 | 1.28E-05 | 4.47E-04 |
| ENSG00000197646 | PDCD1LG2   | 1.86E+00 | 1.31E-05 | 4.55E-04 |
| ENSG00000114771 | AADAC      | 1.51E+00 | 1.37E-05 | 4.69E-04 |
| ENSG00000108688 | CCL7       | 2.69E+00 | 1.45E-05 | 4.90E-04 |
| ENSG00000162407 | PLPP3      | 2.83E+00 | 1.72E-05 | 5.72E-04 |
| ENSG00000164181 | ELOVL7     | 1.55E+00 | 2.02E-05 | 6.50E-04 |
| ENSG00000144583 | MARCH4     | 2.19E+00 | 2.07E-05 | 6.61E-04 |
| ENSG00000160712 | IL6R       | 1.81E+00 | 2.29E-05 | 7.14E-04 |
| ENSG00000171608 | PIK3CD     | 1.38E+00 | 2.44E-05 | 7.44E-04 |
| ENSG00000166920 | C15orf48   | 3.49E+00 | 2.82E-05 | 8.47E-04 |
| ENSG00000232759 | AC002480.1 | 2.11E+00 | 3.02E-05 | 9.01E-04 |
| ENSG00000106089 | STX1A      | 1.44E+00 | 3.06E-05 | 9.13E-04 |

|                 |            |          |          |          |
|-----------------|------------|----------|----------|----------|
| ENSG00000149289 | ZC3H12C    | 1.18E+00 | 3.77E-05 | 1.07E-03 |
| ENSG00000166833 | NAV2       | 1.10E+00 | 3.90E-05 | 1.11E-03 |
| ENSG00000125730 | C3         | 1.27E+00 | 4.36E-05 | 1.22E-03 |
| ENSG00000175820 | CCDC168    | 1.56E+00 | 4.63E-05 | 1.28E-03 |
| ENSG00000153823 | PID1       | 1.57E+00 | 4.86E-05 | 1.32E-03 |
| ENSG00000113645 | WWC1       | 1.06E+00 | 5.35E-05 | 1.43E-03 |
| ENSG00000122861 | PLAU       | 1.21E+00 | 5.75E-05 | 1.53E-03 |
| ENSG00000155846 | PPARGC1B   | 1.29E+00 | 5.83E-05 | 1.54E-03 |
| ENSG00000108700 | CCL8       | 3.82E+00 | 5.99E-05 | 1.58E-03 |
| ENSG00000140379 | BCL2A1     | 3.88E+00 | 6.38E-05 | 1.66E-03 |
| ENSG00000251194 | AL133330.1 | 2.33E+00 | 6.54E-05 | 1.70E-03 |
| ENSG00000187479 | C11orf96   | 1.65E+00 | 6.84E-05 | 1.77E-03 |
| ENSG00000270069 | MIR222HG   | 1.07E+00 | 9.22E-05 | 2.26E-03 |
| ENSG00000233608 | TWIST2     | 1.05E+00 | 1.40E-04 | 3.10E-03 |
| ENSG00000136167 | LCP1       | 2.33E+00 | 1.45E-04 | 3.17E-03 |
| ENSG00000149968 | MMP3       | 3.06E+00 | 1.80E-04 | 3.76E-03 |
| ENSG00000111186 | WNT5B      | 1.43E+00 | 1.85E-04 | 3.85E-03 |
| ENSG00000162892 | IL24       | 4.50E+00 | 1.94E-04 | 4.01E-03 |
| ENSG00000115919 | KYNU       | 2.04E+00 | 2.01E-04 | 4.11E-03 |
| ENSG00000163376 | KBTBD8     | 1.78E+00 | 2.09E-04 | 4.23E-03 |
| ENSG00000120129 | DUSP1      | 1.11E+00 | 2.14E-04 | 4.29E-03 |
| ENSG00000102554 | KLF5       | 2.04E+00 | 2.21E-04 | 4.38E-03 |
| ENSG00000176170 | SPHK1      | 1.02E+00 | 2.34E-04 | 4.58E-03 |
| ENSG00000235885 | LINC01828  | 3.32E+00 | 2.39E-04 | 4.65E-03 |
| ENSG00000166922 | SCG5       | 2.67E+00 | 2.67E-04 | 5.11E-03 |
| ENSG00000237515 | SHISA9     | 2.18E+00 | 2.86E-04 | 5.38E-03 |
| ENSG00000109220 | CHIC2      | 1.05E+00 | 2.90E-04 | 5.42E-03 |
| ENSG00000112541 | PDE10A     | 1.07E+00 | 3.15E-04 | 5.82E-03 |
| ENSG00000182957 | SPATA13    | 1.18E+00 | 3.22E-04 | 5.91E-03 |
| ENSG00000171488 | LRRC8C     | 1.38E+00 | 3.22E-04 | 5.92E-03 |
| ENSG00000076356 | PLXNA2     | 1.21E+00 | 3.82E-04 | 6.75E-03 |
| ENSG00000162494 | LRRC38     | 2.89E+00 | 3.90E-04 | 6.82E-03 |
| ENSG00000023171 | GRAMD1B    | 1.60E+00 | 4.61E-04 | 7.88E-03 |
| ENSG00000166401 | SERPINB8   | 1.23E+00 | 5.15E-04 | 8.53E-03 |
| ENSG00000153976 | HS3ST3A1   | 1.48E+00 | 5.93E-04 | 9.51E-03 |
| ENSG00000119888 | EPCAM      | 2.59E+00 | 6.22E-04 | 9.89E-03 |
| ENSG00000123689 | G0S2       | 2.64E+00 | 6.29E-04 | 9.97E-03 |
| ENSG00000276107 | AC037198.1 | 1.58E+00 | 6.49E-04 | 1.02E-02 |
| ENSG00000115844 | DLX2       | 1.50E+00 | 6.56E-04 | 1.03E-02 |
| ENSG00000164283 | ESM1       | 3.80E+00 | 7.62E-04 | 1.16E-02 |
| ENSG00000243225 | AC007686.1 | 1.31E+00 | 7.81E-04 | 1.18E-02 |
| ENSG00000253626 | EIF5AL1    | 1.11E+00 | 8.29E-04 | 1.23E-02 |
| ENSG00000167772 | ANGPTL4    | 1.16E+00 | 8.46E-04 | 1.25E-02 |
| ENSG00000198729 | PPP1R14C   | 1.49E+00 | 8.47E-04 | 1.25E-02 |
| ENSG00000206538 | VGLL3      | 1.31E+00 | 8.59E-04 | 1.26E-02 |

|                 |            |          |          |          |
|-----------------|------------|----------|----------|----------|
| ENSG00000149948 | HMGA2      | 1.20E+00 | 9.00E-04 | 1.30E-02 |
| ENSG00000134815 | DHX34      | 1.09E+00 | 1.00E-03 | 1.42E-02 |
| ENSG00000165105 | RASEF      | 1.11E+00 | 1.05E-03 | 1.47E-02 |
| ENSG00000196935 | SRGAP1     | 1.06E+00 | 1.11E-03 | 1.53E-02 |
| ENSG00000234883 | MIR155HG   | 1.68E+00 | 1.19E-03 | 1.60E-02 |
| ENSG00000135318 | NT5E       | 1.08E+00 | 1.20E-03 | 1.61E-02 |
| ENSG00000117114 | ADGRL2     | 1.41E+00 | 1.21E-03 | 1.63E-02 |
| ENSG00000134363 | FST        | 1.10E+00 | 1.29E-03 | 1.69E-02 |
| ENSG00000187583 | PLEKHN1    | 1.52E+00 | 1.63E-03 | 2.01E-02 |
| ENSG00000280287 | AC131212.3 | 1.71E+00 | 1.72E-03 | 2.10E-02 |
| ENSG00000249673 | NOP14-AS1  | 1.24E+00 | 1.77E-03 | 2.14E-02 |
| ENSG00000179242 | CDH4       | 1.99E+00 | 1.78E-03 | 2.15E-02 |
| ENSG00000132003 | ZSWIM4     | 1.04E+00 | 1.93E-03 | 2.27E-02 |
| ENSG00000134668 | SPOCD1     | 1.21E+00 | 2.19E-03 | 2.49E-02 |
| ENSG00000110427 | KIAA1549L  | 1.19E+00 | 2.34E-03 | 2.60E-02 |
| ENSG00000154928 | EPHB1      | 3.18E+00 | 2.53E-03 | 2.77E-02 |
| ENSG00000185634 | SHC4       | 1.42E+00 | 2.55E-03 | 2.78E-02 |
| ENSG00000115738 | ID2        | 1.52E+00 | 2.60E-03 | 2.82E-02 |
| ENSG00000154736 | ADAMTS5    | 1.45E+00 | 2.75E-03 | 2.92E-02 |
| ENSG00000180233 | ZNRF2      | 1.07E+00 | 2.85E-03 | 3.00E-02 |
| ENSG00000162894 | FCMR       | 2.60E+00 | 2.89E-03 | 3.03E-02 |
| ENSG00000188064 | WNT7B      | 1.33E+00 | 3.18E-03 | 3.24E-02 |
| ENSG00000183780 | SLC35F3    | 2.59E+00 | 3.22E-03 | 3.28E-02 |
| ENSG00000105825 | TFPI2      | 1.05E+00 | 3.25E-03 | 3.30E-02 |
| ENSG00000181751 | C5orf30    | 1.13E+00 | 3.26E-03 | 3.30E-02 |
| ENSG00000178726 | THBD       | 1.01E+00 | 3.27E-03 | 3.30E-02 |
| ENSG00000204767 | INSYN2B    | 2.23E+00 | 3.26E-03 | 3.30E-02 |
| ENSG00000163481 | RNF25      | 1.25E+00 | 3.43E-03 | 3.42E-02 |
| ENSG00000275464 | FP565260.1 | 1.18E+00 | 3.50E-03 | 3.47E-02 |
| ENSG00000120217 | CD274      | 1.41E+00 | 3.64E-03 | 3.56E-02 |
| ENSG00000138347 | MYPN       | 2.37E+00 | 4.15E-03 | 3.92E-02 |
| ENSG00000176907 | TCIM       | 1.94E+00 | 4.27E-03 | 3.99E-02 |
| ENSG00000143995 | MEIS1      | 1.38E+00 | 4.31E-03 | 4.02E-02 |
| ENSG00000162595 | DIRAS3     | 1.64E+00 | 4.72E-03 | 4.28E-02 |
| ENSG00000110031 | LPXN       | 2.21E+00 | 4.79E-03 | 4.32E-02 |
| ENSG00000197620 | CXorf40A   | 1.24E+00 | 4.82E-03 | 4.36E-02 |
| ENSG00000258441 | LINC00641  | 1.30E+00 | 5.16E-03 | 4.56E-02 |
| ENSG00000172738 | TMEM217    | 1.21E+00 | 5.16E-03 | 4.56E-02 |
| ENSG00000184012 | TMPRSS2    | 2.27E+00 | 5.54E-03 | 4.78E-02 |
| ENSG00000101230 | ISM1       | 2.50E+00 | 5.56E-03 | 4.80E-02 |
| ENSG00000163131 | CTSS       | 1.00E+00 | 5.75E-03 | 4.91E-02 |
| ENSG00000087494 | PTHLH      | 1.34E+00 | 5.76E-03 | 4.91E-02 |
| ENSG00000157445 | CACNA2D3   | 2.18E+00 | 5.79E-03 | 4.93E-02 |
| ENSG00000181634 | TNFSF15    | 1.38E+00 | 5.85E-03 | 4.97E-02 |
| ENSG00000171522 | PTGER4     | 1.02E+00 | 5.88E-03 | 4.98E-02 |

**Supplementary table 6. Significant DRGs with versus without IL-1 $\beta$  stimulation in Ad-EGFP transduced samples.**

| Gene ID         | Gene name | Log2(FC)  | P value  | FDR      |
|-----------------|-----------|-----------|----------|----------|
| ENSG00000162496 | DHRS3     | -2.74E+00 | 1.22E-37 | 1.05E-34 |
| ENSG00000148660 | CAMK2G    | -1.00E+00 | 6.69E-13 | 1.09E-10 |
| ENSG00000074370 | ATP2A3    | -2.79E+00 | 1.58E-12 | 2.32E-10 |
| ENSG00000180739 | S1PR5     | -2.35E+00 | 8.38E-12 | 1.13E-09 |
| ENSG00000185909 | KLHDC8B   | -1.31E+00 | 1.61E-11 | 2.01E-09 |
| ENSG00000129422 | MTUS1     | -1.50E+00 | 1.65E-11 | 2.02E-09 |
| ENSG00000106789 | CORO2A    | -2.30E+00 | 2.62E-11 | 3.10E-09 |
| ENSG00000166313 | APBB1     | -1.13E+00 | 4.28E-11 | 4.95E-09 |
| ENSG00000250510 | GPR162    | -2.08E+00 | 5.58E-11 | 6.36E-09 |
| ENSG00000179403 | VWA1      | -1.09E+00 | 7.46E-11 | 8.24E-09 |
| ENSG00000187634 | SAMD11    | -1.90E+00 | 1.13E-10 | 1.22E-08 |
| ENSG00000198794 | SCAMP5    | -1.17E+00 | 1.17E-09 | 1.07E-07 |
| ENSG00000163565 | IFI16     | -1.05E+00 | 2.14E-09 | 1.90E-07 |
| ENSG00000138496 | PARP9     | -1.42E+00 | 3.14E-09 | 2.77E-07 |
| ENSG00000182010 | RTKN2     | -1.73E+00 | 4.08E-09 | 3.56E-07 |
| ENSG00000090661 | CERS4     | -1.82E+00 | 5.55E-09 | 4.66E-07 |
| ENSG00000176046 | NUPR1     | -1.43E+00 | 5.55E-09 | 4.66E-07 |
| ENSG00000120756 | PLS1      | -1.60E+00 | 5.63E-09 | 4.70E-07 |
| ENSG00000087842 | PIR       | -1.23E+00 | 6.60E-09 | 5.48E-07 |
| ENSG00000111913 | RIPOR2    | -3.59E+00 | 9.77E-09 | 7.84E-07 |
| ENSG00000105514 | RAB3D     | -2.48E+00 | 1.01E-08 | 7.98E-07 |
| ENSG00000147130 | ZMYM3     | -1.30E+00 | 1.54E-08 | 1.17E-06 |
| ENSG00000196535 | MYO18A    | -1.19E+00 | 3.76E-08 | 2.57E-06 |
| ENSG00000184117 | NIPSNAP1  | -1.38E+00 | 4.37E-08 | 2.96E-06 |
| ENSG00000240024 | LINC00888 | -1.41E+00 | 5.19E-08 | 3.40E-06 |
| ENSG00000099940 | SNAP29    | -1.11E+00 | 5.59E-08 | 3.62E-06 |
| ENSG00000131069 | ACSS2     | -1.08E+00 | 1.23E-07 | 7.61E-06 |
| ENSG00000157978 | LDLRAP1   | -1.05E+00 | 1.50E-07 | 9.13E-06 |
| ENSG00000188338 | SLC38A3   | -1.21E+00 | 1.65E-07 | 9.94E-06 |
| ENSG00000221963 | APOL6     | -1.04E+00 | 2.15E-07 | 1.26E-05 |
| ENSG00000104888 | SLC17A7   | -1.73E+00 | 2.30E-07 | 1.33E-05 |
| ENSG00000135365 | PHF21A    | -1.02E+00 | 2.99E-07 | 1.67E-05 |
| ENSG00000099284 | H2AFY2    | -1.09E+00 | 3.05E-07 | 1.69E-05 |
| ENSG00000165716 | DIPK1B    | -1.39E+00 | 3.08E-07 | 1.70E-05 |
| ENSG00000103485 | QPRT      | -1.12E+00 | 3.22E-07 | 1.77E-05 |
| ENSG00000178821 | TMEM52    | -2.22E+00 | 3.44E-07 | 1.89E-05 |
| ENSG00000143590 | EFNA3     | -1.38E+00 | 4.49E-07 | 2.38E-05 |
| ENSG00000169129 | AFAP1L2   | -2.03E+00 | 4.73E-07 | 2.50E-05 |
| ENSG00000122592 | HOXA7     | -1.23E+00 | 5.77E-07 | 3.00E-05 |
| ENSG00000105559 | PLEKHA4   | -1.21E+00 | 6.26E-07 | 3.25E-05 |
| ENSG00000076826 | CAMSAP3   | -2.57E+00 | 1.10E-06 | 5.44E-05 |
| ENSG00000166963 | MAP1A     | -1.66E+00 | 1.18E-06 | 5.78E-05 |
| ENSG00000065361 | ERBB3     | -2.25E+00 | 1.25E-06 | 6.05E-05 |

|                 |            |           |          |          |
|-----------------|------------|-----------|----------|----------|
| ENSG00000117266 | CDK18      | -2.20E+00 | 1.47E-06 | 6.98E-05 |
| ENSG00000265972 | TXNIP      | -2.05E+00 | 1.58E-06 | 7.47E-05 |
| ENSG00000167680 | SEMA6B     | -1.05E+00 | 1.73E-06 | 8.05E-05 |
| ENSG00000088367 | EPB41L1    | -1.02E+00 | 1.86E-06 | 8.59E-05 |
| ENSG00000182606 | TRAK1      | -1.02E+00 | 2.94E-06 | 1.31E-04 |
| ENSG00000130475 | FCHO1      | -4.04E+00 | 3.05E-06 | 1.36E-04 |
| ENSG00000185630 | PBX1       | -1.20E+00 | 3.10E-06 | 1.37E-04 |
| ENSG00000088305 | DNMT3B     | -1.18E+00 | 3.25E-06 | 1.42E-04 |
| ENSG00000165113 | GKAP1      | -1.39E+00 | 3.52E-06 | 1.51E-04 |
| ENSG00000021355 | SERPINB1   | -1.05E+00 | 3.81E-06 | 1.62E-04 |
| ENSG00000162076 | FLYWCH2    | -1.36E+00 | 3.91E-06 | 1.65E-04 |
| ENSG00000175938 | ORAI3      | -1.75E+00 | 4.40E-06 | 1.85E-04 |
| ENSG00000141750 | STAC2      | -1.55E+00 | 4.55E-06 | 1.90E-04 |
| ENSG00000257178 | AC103702.1 | -4.18E+00 | 4.98E-06 | 2.07E-04 |
| ENSG00000166352 | C11orf74   | -1.23E+00 | 5.12E-06 | 2.12E-04 |
| ENSG00000105270 | CLIP3      | -1.13E+00 | 5.16E-06 | 2.12E-04 |
| ENSG00000159184 | HOXB13     | -2.01E+00 | 5.20E-06 | 2.13E-04 |
| ENSG00000185432 | METTL7A    | -2.75E+00 | 5.30E-06 | 2.16E-04 |
| ENSG00000064195 | DLX3       | -1.25E+00 | 5.83E-06 | 2.35E-04 |
| ENSG00000090238 | YPEL3      | -1.39E+00 | 6.03E-06 | 2.41E-04 |
| ENSG00000154240 | CEP112     | -1.22E+00 | 6.41E-06 | 2.53E-04 |
| ENSG00000188177 | ZC3H6      | -1.38E+00 | 7.57E-06 | 2.92E-04 |
| ENSG00000012822 | CALCOCO1   | -1.19E+00 | 7.61E-06 | 2.92E-04 |
| ENSG00000173868 | PHOSPHO1   | -2.69E+00 | 7.74E-06 | 2.95E-04 |
| ENSG00000023892 | DEF6       | -1.50E+00 | 8.48E-06 | 3.18E-04 |
| ENSG00000139725 | RHOF       | -1.12E+00 | 8.62E-06 | 3.21E-04 |
| ENSG00000184584 | TMEM173    | -1.26E+00 | 8.71E-06 | 3.23E-04 |
| ENSG00000073331 | ALPK1      | -2.30E+00 | 1.01E-05 | 3.70E-04 |
| ENSG00000182580 | EPHB3      | -1.28E+00 | 1.02E-05 | 3.70E-04 |
| ENSG00000171992 | SYNPO      | -1.67E+00 | 1.03E-05 | 3.72E-04 |
| ENSG00000169783 | LINGO1     | -1.45E+00 | 1.05E-05 | 3.77E-04 |
| ENSG00000163683 | SMIM14     | -1.03E+00 | 1.15E-05 | 4.08E-04 |
| ENSG00000110921 | MVK        | -1.05E+00 | 1.26E-05 | 4.41E-04 |
| ENSG00000160447 | PKN3       | -1.68E+00 | 1.31E-05 | 4.56E-04 |
| ENSG00000226137 | BAIAP2-DT  | -1.50E+00 | 1.32E-05 | 4.56E-04 |
| ENSG00000169499 | PLEKHA2    | -1.34E+00 | 1.45E-05 | 4.90E-04 |
| ENSG00000105516 | DBP        | -1.64E+00 | 1.47E-05 | 4.95E-04 |
| ENSG00000157470 | FAM81A     | -1.66E+00 | 1.51E-05 | 5.08E-04 |
| ENSG00000196220 | SRGAP3     | -2.72E+00 | 1.66E-05 | 5.53E-04 |
| ENSG00000110076 | NRXN2      | -2.18E+00 | 1.68E-05 | 5.58E-04 |
| ENSG00000077092 | RARB       | -5.46E+00 | 1.76E-05 | 5.82E-04 |
| ENSG00000185745 | IFIT1      | -2.12E+00 | 1.96E-05 | 6.36E-04 |
| ENSG00000183196 | CHST6      | -1.61E+00 | 2.01E-05 | 6.47E-04 |
| ENSG00000131018 | SYNE1      | -1.13E+00 | 2.03E-05 | 6.51E-04 |
| ENSG00000140044 | JDP2       | -1.35E+00 | 2.11E-05 | 6.71E-04 |

|                 |            |           |          |          |
|-----------------|------------|-----------|----------|----------|
| ENSG00000158164 | TMSB15A    | -2.19E+00 | 2.17E-05 | 6.83E-04 |
| ENSG00000250802 | ZBED3-AS1  | -3.30E+00 | 2.17E-05 | 6.83E-04 |
| ENSG00000165821 | SALL2      | -1.62E+00 | 2.23E-05 | 6.99E-04 |
| ENSG00000118640 | VAMP8      | -3.00E+00 | 2.28E-05 | 7.11E-04 |
| ENSG00000143375 | CGN        | -1.68E+00 | 2.38E-05 | 7.35E-04 |
| ENSG00000148426 | PROSER2    | -1.24E+00 | 2.40E-05 | 7.36E-04 |
| ENSG00000205978 | NYNRIN     | -3.71E+00 | 2.74E-05 | 8.26E-04 |
| ENSG00000110315 | RNF141     | -1.17E+00 | 2.76E-05 | 8.30E-04 |
| ENSG00000181035 | SLC25A42   | -1.54E+00 | 2.89E-05 | 8.65E-04 |
| ENSG00000099954 | CECR2      | -2.46E+00 | 3.39E-05 | 9.93E-04 |
| ENSG00000172819 | RARG       | -1.01E+00 | 3.43E-05 | 1.00E-03 |
| ENSG00000205356 | TECPR1     | -1.54E+00 | 3.44E-05 | 1.00E-03 |
| ENSG00000119862 | LGALSL     | -1.30E+00 | 3.51E-05 | 1.01E-03 |
| ENSG00000133056 | PIK3C2B    | -1.54E+00 | 3.73E-05 | 1.06E-03 |
| ENSG00000119922 | IFIT2      | -1.94E+00 | 4.04E-05 | 1.15E-03 |
| ENSG00000082458 | DLG3       | -1.00E+00 | 4.16E-05 | 1.17E-03 |
| ENSG00000166575 | TMEM135    | -1.09E+00 | 4.36E-05 | 1.22E-03 |
| ENSG00000128268 | MGAT3      | -1.33E+00 | 4.41E-05 | 1.23E-03 |
| ENSG00000177674 | AGTRAP     | -1.37E+00 | 4.47E-05 | 1.24E-03 |
| ENSG00000225783 | MIAT       | -2.55E+00 | 4.73E-05 | 1.29E-03 |
| ENSG00000126603 | GLIS2      | -1.13E+00 | 5.06E-05 | 1.37E-03 |
| ENSG00000095539 | SEMA4G     | -1.48E+00 | 7.00E-05 | 1.80E-03 |
| ENSG00000245848 | CEBPA      | -2.08E+00 | 7.96E-05 | 2.01E-03 |
| ENSG00000235823 | OLMALINC   | -1.15E+00 | 8.34E-05 | 2.08E-03 |
| ENSG00000115525 | ST3GAL5    | -1.29E+00 | 8.45E-05 | 2.10E-03 |
| ENSG00000158246 | TENT5B     | -1.17E+00 | 8.65E-05 | 2.15E-03 |
| ENSG00000124496 | TRERF1     | -1.12E+00 | 8.77E-05 | 2.17E-03 |
| ENSG00000139269 | INHBE      | -2.48E+00 | 8.97E-05 | 2.21E-03 |
| ENSG00000142082 | SIRT3      | -1.45E+00 | 9.21E-05 | 2.26E-03 |
| ENSG00000137959 | IFI44L     | -2.47E+00 | 9.28E-05 | 2.27E-03 |
| ENSG00000121851 | POLR3GL    | -1.27E+00 | 9.57E-05 | 2.33E-03 |
| ENSG00000164116 | GUCY1A1    | -1.89E+00 | 9.79E-05 | 2.37E-03 |
| ENSG00000238113 | LINC01410  | -3.51E+00 | 1.02E-04 | 2.44E-03 |
| ENSG00000132000 | PODNL1     | -1.41E+00 | 1.03E-04 | 2.46E-03 |
| ENSG00000270673 | YTHDF3-AS1 | -2.76E+00 | 1.03E-04 | 2.46E-03 |
| ENSG00000132846 | ZBED3      | -1.64E+00 | 1.04E-04 | 2.48E-03 |
| ENSG00000186897 | C1QL4      | -1.60E+00 | 1.07E-04 | 2.53E-03 |
| ENSG00000070371 | CLTCL1     | -1.69E+00 | 1.08E-04 | 2.55E-03 |
| ENSG00000149922 | TBX6       | -4.97E+00 | 1.18E-04 | 2.72E-03 |
| ENSG00000257596 | SCAT2      | -4.47E+00 | 1.20E-04 | 2.77E-03 |
| ENSG00000175575 | PAAF1      | -1.10E+00 | 1.25E-04 | 2.87E-03 |
| ENSG00000177984 | LCN15      | -3.74E+00 | 1.26E-04 | 2.87E-03 |
| ENSG00000160325 | CACFD1     | -1.10E+00 | 1.38E-04 | 3.06E-03 |
| ENSG00000123080 | CDKN2C     | -1.02E+00 | 1.41E-04 | 3.11E-03 |
| ENSG00000139178 | C1RL       | -1.67E+00 | 1.45E-04 | 3.17E-03 |



|                 |            |           |          |          |
|-----------------|------------|-----------|----------|----------|
| ENSG00000167157 | PRRX2      | -1.13E+00 | 1.46E-04 | 3.18E-03 |
| ENSG00000183765 | CHEK2      | -1.10E+00 | 1.50E-04 | 3.26E-03 |
| ENSG00000180902 | D2HGDH     | -1.08E+00 | 1.57E-04 | 3.37E-03 |
| ENSG00000235961 | PNMA6A     | -2.21E+00 | 1.71E-04 | 3.62E-03 |
| ENSG00000052850 | ALX4       | -1.77E+00 | 1.73E-04 | 3.66E-03 |
| ENSG00000257698 | GIHCG      | -1.17E+00 | 1.75E-04 | 3.70E-03 |
| ENSG00000163283 | ALPP       | -3.22E+00 | 1.76E-04 | 3.71E-03 |
| ENSG00000164330 | EBF1       | -1.54E+00 | 1.98E-04 | 4.09E-03 |
| ENSG00000132321 | IQCA1      | -1.17E+00 | 2.03E-04 | 4.13E-03 |
| ENSG00000117602 | RCAN3      | -1.48E+00 | 2.18E-04 | 4.35E-03 |
| ENSG00000138111 | MFSD13A    | -1.92E+00 | 2.23E-04 | 4.42E-03 |
| ENSG00000125703 | ATG4C      | -1.22E+00 | 2.24E-04 | 4.42E-03 |
| ENSG00000177570 | SAMD12     | -3.15E+00 | 2.39E-04 | 4.65E-03 |
| ENSG00000110844 | PRPF40B    | -1.14E+00 | 2.43E-04 | 4.72E-03 |
| ENSG00000168913 | ENHO       | -1.16E+00 | 2.44E-04 | 4.73E-03 |
| ENSG00000138036 | DYNC2LI1   | -1.01E+00 | 2.54E-04 | 4.90E-03 |
| ENSG00000135452 | TSPAN31    | -1.45E+00 | 2.62E-04 | 5.03E-03 |
| ENSG00000139428 | MMAB       | -1.05E+00 | 2.84E-04 | 5.35E-03 |
| ENSG00000273253 | AL022328.4 | -2.21E+00 | 2.86E-04 | 5.38E-03 |
| ENSG00000180425 | C11orf71   | -2.09E+00 | 2.87E-04 | 5.38E-03 |
| ENSG00000137198 | GMPR       | -2.03E+00 | 2.89E-04 | 5.42E-03 |
| ENSG00000167733 | HSD11B1L   | -1.43E+00 | 3.02E-04 | 5.63E-03 |
| ENSG00000181790 | ADGRB1     | -1.07E+00 | 3.09E-04 | 5.74E-03 |
| ENSG00000157514 | TSC22D3    | -1.20E+00 | 3.18E-04 | 5.86E-03 |
| ENSG00000281128 | PTENP1-AS  | -1.68E+00 | 3.25E-04 | 5.95E-03 |
| ENSG00000178038 | ALS2CL     | -2.64E+00 | 3.25E-04 | 5.95E-03 |
| ENSG00000115596 | WNT6       | -1.34E+00 | 3.36E-04 | 6.09E-03 |
| ENSG00000142327 | RNPEPL1    | -1.12E+00 | 3.42E-04 | 6.19E-03 |
| ENSG00000125895 | TMEM74B    | -2.13E+00 | 3.44E-04 | 6.20E-03 |
| ENSG00000074964 | ARHGEF10L  | -1.12E+00 | 3.52E-04 | 6.32E-03 |
| ENSG00000095066 | HOOK2      | -1.05E+00 | 3.70E-04 | 6.57E-03 |
| ENSG00000170373 | CST1       | -4.00E+00 | 3.72E-04 | 6.61E-03 |
| ENSG00000161896 | IP6K3      | -2.29E+00 | 4.48E-04 | 7.70E-03 |
| ENSG00000115459 | ELMOD3     | -1.11E+00 | 4.55E-04 | 7.79E-03 |
| ENSG00000130529 | TRPM4      | -1.06E+00 | 4.64E-04 | 7.91E-03 |
| ENSG00000185187 | SIGIRR     | -1.17E+00 | 4.69E-04 | 7.98E-03 |
| ENSG00000072195 | SPEG       | -1.14E+00 | 4.78E-04 | 8.09E-03 |
| ENSG00000139531 | SUOX       | -1.33E+00 | 5.02E-04 | 8.39E-03 |
| ENSG00000026950 | BTN3A1     | -1.05E+00 | 5.04E-04 | 8.41E-03 |
| ENSG00000099864 | PALM       | -1.22E+00 | 5.04E-04 | 8.41E-03 |
| ENSG00000119943 | PYROXD2    | -3.14E+00 | 5.10E-04 | 8.48E-03 |
| ENSG00000135119 | RNFT2      | -1.08E+00 | 5.10E-04 | 8.48E-03 |
| ENSG00000198246 | SLC29A3    | -1.32E+00 | 5.09E-04 | 8.48E-03 |
| ENSG00000161328 | LRRC56     | -2.49E+00 | 5.19E-04 | 8.59E-03 |
| ENSG00000137700 | SLC37A4    | -1.37E+00 | 5.20E-04 | 8.59E-03 |

|                 |            |           |          |          |
|-----------------|------------|-----------|----------|----------|
| ENSG00000228630 | HOTAIR     | -1.53E+00 | 5.27E-04 | 8.67E-03 |
| ENSG00000103021 | CCDC113    | -2.19E+00 | 5.34E-04 | 8.77E-03 |
| ENSG00000119408 | NEK6       | -1.02E+00 | 5.40E-04 | 8.84E-03 |
| ENSG00000164683 | HEY1       | -1.20E+00 | 5.64E-04 | 9.13E-03 |
| ENSG00000158106 | RHPN1      | -1.47E+00 | 6.12E-04 | 9.78E-03 |
| ENSG00000112367 | FIG4       | -1.44E+00 | 6.31E-04 | 1.00E-02 |
| ENSG00000010310 | GIPR       | -2.98E+00 | 6.42E-04 | 1.01E-02 |
| ENSG00000262185 | AC005736.1 | -3.02E+00 | 6.72E-04 | 1.05E-02 |
| ENSG00000196557 | CACNA1H    | -2.02E+00 | 6.75E-04 | 1.06E-02 |
| ENSG00000106004 | HOXA5      | -1.41E+00 | 6.89E-04 | 1.07E-02 |
| ENSG00000116990 | MYCL       | -1.71E+00 | 7.23E-04 | 1.11E-02 |
| ENSG00000184986 | TMEM121    | -1.14E+00 | 7.30E-04 | 1.12E-02 |
| ENSG00000131797 | CLUHP3     | -1.83E+00 | 7.62E-04 | 1.16E-02 |
| ENSG00000178404 | CEP295NL   | -3.67E+00 | 7.64E-04 | 1.16E-02 |
| ENSG00000125652 | ALKBH7     | -1.01E+00 | 7.75E-04 | 1.17E-02 |
| ENSG00000236859 | NIFK-AS1   | -1.30E+00 | 8.01E-04 | 1.20E-02 |
| ENSG00000137463 | MGARP      | -1.22E+00 | 8.05E-04 | 1.20E-02 |
| ENSG00000075340 | ADD2       | -4.06E+00 | 8.06E-04 | 1.20E-02 |
| ENSG00000176386 | CDC26      | -3.05E+00 | 8.11E-04 | 1.21E-02 |
| ENSG00000144306 | SCRN3      | -1.05E+00 | 8.21E-04 | 1.22E-02 |
| ENSG00000248487 | ABHD14A    | -1.08E+00 | 8.75E-04 | 1.28E-02 |
| ENSG00000239039 | SNORD13    | -3.51E+00 | 8.84E-04 | 1.29E-02 |
| ENSG00000115266 | APC2       | -1.85E+00 | 8.87E-04 | 1.29E-02 |
| ENSG00000198189 | HSD17B11   | -1.05E+00 | 8.89E-04 | 1.29E-02 |
| ENSG00000167771 | RCOR2      | -1.45E+00 | 9.14E-04 | 1.32E-02 |
| ENSG00000169220 | RGS14      | -1.41E+00 | 9.19E-04 | 1.32E-02 |
| ENSG00000203778 | FAM229B    | -1.25E+00 | 9.31E-04 | 1.34E-02 |
| ENSG00000127220 | ABHD8      | -1.12E+00 | 9.59E-04 | 1.37E-02 |
| ENSG00000130005 | GAMT       | -1.02E+00 | 9.58E-04 | 1.37E-02 |
| ENSG00000160801 | PTH1R      | -3.28E+00 | 1.02E-03 | 1.44E-02 |
| ENSG00000108370 | RGS9       | -1.59E+00 | 1.04E-03 | 1.46E-02 |
| ENSG00000108387 | SEPTIN4    | -1.14E+00 | 1.06E-03 | 1.48E-02 |
| ENSG00000241935 | HOGA1      | -3.56E+00 | 1.07E-03 | 1.48E-02 |
| ENSG00000166839 | ANKDD1A    | -1.11E+00 | 1.08E-03 | 1.49E-02 |
| ENSG00000110628 | SLC22A18   | -1.09E+00 | 1.08E-03 | 1.50E-02 |
| ENSG00000167536 | DHRS13     | -1.12E+00 | 1.11E-03 | 1.52E-02 |
| ENSG00000196132 | MYT1       | -2.92E+00 | 1.11E-03 | 1.53E-02 |
| ENSG00000060642 | PIGV       | -1.46E+00 | 1.16E-03 | 1.58E-02 |
| ENSG00000129159 | KCNC1      | -3.22E+00 | 1.17E-03 | 1.59E-02 |
| ENSG00000089723 | OTUB2      | -2.78E+00 | 1.18E-03 | 1.60E-02 |
| ENSG00000062282 | DGAT2      | -1.08E+00 | 1.18E-03 | 1.60E-02 |
| ENSG00000177409 | SAMD9L     | -1.78E+00 | 1.21E-03 | 1.62E-02 |
| ENSG00000215788 | TNFRSF25   | -1.60E+00 | 1.22E-03 | 1.64E-02 |
| ENSG00000138613 | APH1B      | -1.29E+00 | 1.22E-03 | 1.64E-02 |
| ENSG00000198496 | NBR2       | -1.10E+00 | 1.22E-03 | 1.64E-02 |

|                 |            |           |          |          |
|-----------------|------------|-----------|----------|----------|
| ENSG00000224616 | RTCA-AS1   | -1.93E+00 | 1.23E-03 | 1.64E-02 |
| ENSG00000006606 | CCL26      | -2.20E+00 | 1.24E-03 | 1.65E-02 |
| ENSG00000180448 | ARHGAP45   | -1.75E+00 | 1.25E-03 | 1.66E-02 |
| ENSG00000148219 | ASTN2      | -1.57E+00 | 1.28E-03 | 1.69E-02 |
| ENSG00000009950 | MLXIPL     | -3.74E+00 | 1.29E-03 | 1.69E-02 |
| ENSG00000108176 | DNAJC12    | -1.42E+00 | 1.29E-03 | 1.69E-02 |
| ENSG00000129757 | CDKN1C     | -1.08E+00 | 1.29E-03 | 1.69E-02 |
| ENSG00000212232 | SNORD17    | -2.93E+00 | 1.29E-03 | 1.69E-02 |
| ENSG00000162976 | SLC66A3    | -1.88E+00 | 1.33E-03 | 1.73E-02 |
| ENSG00000078114 | NEBL       | -2.65E+00 | 1.36E-03 | 1.77E-02 |
| ENSG00000204060 | FOXO6      | -2.34E+00 | 1.38E-03 | 1.79E-02 |
| ENSG00000196976 | LAGE3      | -1.03E+00 | 1.40E-03 | 1.80E-02 |
| ENSG00000214595 | EML6       | -2.52E+00 | 1.40E-03 | 1.80E-02 |
| ENSG00000189120 | SP6        | -1.19E+00 | 1.41E-03 | 1.82E-02 |
| ENSG00000163702 | IL17RC     | -1.14E+00 | 1.43E-03 | 1.83E-02 |
| ENSG00000085871 | MGST2      | -1.11E+00 | 1.45E-03 | 1.85E-02 |
| ENSG00000181513 | ACBD4      | -1.81E+00 | 1.48E-03 | 1.88E-02 |
| ENSG00000114541 | FRMD4B     | -1.64E+00 | 1.49E-03 | 1.89E-02 |
| ENSG00000150764 | DIXDC1     | -1.00E+00 | 1.53E-03 | 1.93E-02 |
| ENSG00000164124 | TMEM144    | -1.69E+00 | 1.54E-03 | 1.93E-02 |
| ENSG00000258017 | AC011603.2 | -4.02E+00 | 1.56E-03 | 1.95E-02 |
| ENSG00000105997 | HOXA3      | -1.35E+00 | 1.59E-03 | 1.98E-02 |
| ENSG00000128694 | OSGEPL1    | -1.01E+00 | 1.60E-03 | 1.98E-02 |
| ENSG00000180769 | WDFY3-AS2  | -1.76E+00 | 1.60E-03 | 1.98E-02 |
| ENSG00000176399 | DMRTA1     | -1.63E+00 | 1.61E-03 | 1.99E-02 |
| ENSG00000280670 | CCDC163    | -2.31E+00 | 1.63E-03 | 2.01E-02 |
| ENSG00000164125 | GASK1B     | -1.03E+00 | 1.70E-03 | 2.09E-02 |
| ENSG00000128165 | ADM2       | -1.89E+00 | 1.72E-03 | 2.10E-02 |
| ENSG00000172731 | LRRC20     | -1.41E+00 | 1.74E-03 | 2.12E-02 |
| ENSG00000124920 | MYRF       | -1.13E+00 | 1.75E-03 | 2.12E-02 |
| ENSG00000136689 | IL1RN      | -5.86E+00 | 1.75E-03 | 2.12E-02 |
| ENSG00000105664 | COMP       | -2.32E+00 | 1.77E-03 | 2.13E-02 |
| ENSG00000177459 | ERICH5     | -1.50E+00 | 1.78E-03 | 2.15E-02 |
| ENSG00000273297 | AC009275.1 | -1.57E+00 | 1.81E-03 | 2.17E-02 |
| ENSG00000241990 | PRR34-AS1  | -1.07E+00 | 1.87E-03 | 2.22E-02 |
| ENSG00000182472 | CAPN12     | -3.25E+00 | 1.88E-03 | 2.23E-02 |
| ENSG00000120093 | HOXB3      | -1.01E+00 | 1.88E-03 | 2.23E-02 |
| ENSG00000187091 | PLCD1      | -1.01E+00 | 1.95E-03 | 2.30E-02 |
| ENSG00000130208 | APOC1      | -1.31E+00 | 1.96E-03 | 2.30E-02 |
| ENSG00000235706 | DICER1-AS1 | -1.94E+00 | 1.96E-03 | 2.30E-02 |
| ENSG00000129295 | LRRC6      | -1.91E+00 | 1.98E-03 | 2.32E-02 |
| ENSG00000092051 | JPH4       | -2.92E+00 | 2.04E-03 | 2.36E-02 |
| ENSG00000214106 | PAXIP1-AS2 | -1.20E+00 | 2.05E-03 | 2.38E-02 |
| ENSG00000167103 | PIP5KL1    | -1.96E+00 | 2.06E-03 | 2.38E-02 |
| ENSG00000179111 | HES7       | -1.99E+00 | 2.07E-03 | 2.39E-02 |

|                 |             |           |          |          |
|-----------------|-------------|-----------|----------|----------|
| ENSG00000197380 | DACT3       | -1.07E+00 | 2.08E-03 | 2.39E-02 |
| ENSG00000011143 | MKS1        | -1.05E+00 | 2.09E-03 | 2.40E-02 |
| ENSG00000148842 | CNNM2       | -1.01E+00 | 2.10E-03 | 2.41E-02 |
| ENSG00000223478 | AL441992.1  | -1.18E+00 | 2.12E-03 | 2.43E-02 |
| ENSG00000269293 | ZSCAN16-AS1 | -1.02E+00 | 2.14E-03 | 2.45E-02 |
| ENSG00000159307 | SCUBE1      | -3.26E+00 | 2.15E-03 | 2.45E-02 |
| ENSG00000135439 | AGAP2       | -3.41E+00 | 2.15E-03 | 2.46E-02 |
| ENSG00000171345 | KRT19       | -4.57E+00 | 2.20E-03 | 2.49E-02 |
| ENSG00000007516 | BAIAP3      | -1.32E+00 | 2.25E-03 | 2.52E-02 |
| ENSG00000100027 | YPEL1       | -2.07E+00 | 2.35E-03 | 2.61E-02 |
| ENSG00000226781 | TBCAP1      | -4.82E+00 | 2.35E-03 | 2.61E-02 |
| ENSG00000185269 | NOTUM       | -4.12E+00 | 2.38E-03 | 2.63E-02 |
| ENSG00000130656 | HBZ         | -2.83E+00 | 2.44E-03 | 2.69E-02 |
| ENSG00000281189 | GHET1       | -4.28E+00 | 2.44E-03 | 2.69E-02 |
| ENSG00000260001 | TGFBR3L     | -1.07E+00 | 2.45E-03 | 2.70E-02 |
| ENSG00000228506 | AL513550.1  | -1.33E+00 | 2.46E-03 | 2.71E-02 |
| ENSG00000155980 | KIF5A       | -3.52E+00 | 2.48E-03 | 2.72E-02 |
| ENSG00000235954 | TTC28-AS1   | -1.17E+00 | 2.53E-03 | 2.77E-02 |
| ENSG00000250320 | AC113383.1  | -1.15E+00 | 2.53E-03 | 2.77E-02 |
| ENSG00000171045 | TSNARE1     | -1.59E+00 | 2.54E-03 | 2.78E-02 |
| ENSG00000085741 | WNT11       | -1.22E+00 | 2.55E-03 | 2.78E-02 |
| ENSG00000173805 | HAP1        | -1.49E+00 | 2.57E-03 | 2.79E-02 |
| ENSG00000173258 | ZNF483      | -1.13E+00 | 2.58E-03 | 2.80E-02 |
| ENSG00000178623 | GPR35       | -3.13E+00 | 2.60E-03 | 2.82E-02 |
| ENSG00000135338 | LCA5        | -1.25E+00 | 2.63E-03 | 2.84E-02 |
| ENSG00000128965 | CHAC1       | -1.08E+00 | 2.63E-03 | 2.84E-02 |
| ENSG00000197558 | SSPO        | -3.01E+00 | 2.71E-03 | 2.89E-02 |
| ENSG00000085552 | IGSF9       | -1.36E+00 | 2.72E-03 | 2.90E-02 |
| ENSG00000167676 | PLIN4       | -2.63E+00 | 2.73E-03 | 2.90E-02 |
| ENSG00000247081 | BAALC-AS1   | -1.62E+00 | 2.73E-03 | 2.90E-02 |
| ENSG00000101203 | COL20A1     | -4.02E+00 | 2.77E-03 | 2.93E-02 |
| ENSG00000270419 | CAHM        | -2.38E+00 | 2.83E-03 | 2.98E-02 |
| ENSG00000106633 | GCK         | -2.45E+00 | 2.83E-03 | 2.98E-02 |
| ENSG00000205544 | TMEM256     | -1.04E+00 | 2.84E-03 | 2.99E-02 |
| ENSG00000250786 | SNHG18      | -1.16E+00 | 2.88E-03 | 3.02E-02 |
| ENSG00000185133 | INPP5J      | -1.44E+00 | 2.89E-03 | 3.03E-02 |
| ENSG00000206530 | CFAP44      | -1.06E+00 | 2.91E-03 | 3.04E-02 |
| ENSG00000273619 | AL121832.2  | -1.25E+00 | 2.92E-03 | 3.04E-02 |
| ENSG00000189298 | ZKSCAN3     | -1.29E+00 | 2.96E-03 | 3.08E-02 |
| ENSG00000086300 | SNX10       | -1.58E+00 | 2.98E-03 | 3.09E-02 |
| ENSG00000087250 | MT3         | -4.63E+00 | 2.98E-03 | 3.09E-02 |
| ENSG00000160588 | MPZL3       | -1.20E+00 | 3.02E-03 | 3.12E-02 |
| ENSG00000234327 | AC012146.1  | -1.56E+00 | 3.06E-03 | 3.15E-02 |
| ENSG00000025434 | NR1H3       | -1.15E+00 | 3.13E-03 | 3.21E-02 |
| ENSG00000250654 | AC023794.4  | -1.66E+00 | 3.18E-03 | 3.24E-02 |

|                 |              |           |          |          |
|-----------------|--------------|-----------|----------|----------|
| ENSG00000100154 | TTC28        | -1.13E+00 | 3.23E-03 | 3.28E-02 |
| ENSG00000253552 | HOXA-AS2     | -1.49E+00 | 3.23E-03 | 3.28E-02 |
| ENSG00000226314 | ZNF192P1     | -2.13E+00 | 3.27E-03 | 3.30E-02 |
| ENSG00000105877 | DNAH11       | -1.37E+00 | 3.34E-03 | 3.37E-02 |
| ENSG00000174516 | PELI3        | -1.14E+00 | 3.37E-03 | 3.38E-02 |
| ENSG00000173409 | ARV1         | -1.09E+00 | 3.40E-03 | 3.41E-02 |
| ENSG00000184261 | KCNK12       | -3.12E+00 | 3.43E-03 | 3.42E-02 |
| ENSG00000153363 | LINC00467    | -1.40E+00 | 3.45E-03 | 3.43E-02 |
| ENSG00000132470 | ITGB4        | -1.78E+00 | 3.48E-03 | 3.45E-02 |
| ENSG00000135124 | P2RX4        | -1.02E+00 | 3.50E-03 | 3.47E-02 |
| ENSG00000148288 | GBGT1        | -1.23E+00 | 3.50E-03 | 3.47E-02 |
| ENSG00000182575 | NXPH3        | -3.39E+00 | 3.54E-03 | 3.49E-02 |
| ENSG00000187730 | GABRD        | -1.37E+00 | 3.72E-03 | 3.63E-02 |
| ENSG00000247317 | LY6E-DT      | -3.11E+00 | 3.74E-03 | 3.64E-02 |
| ENSG00000176383 | B3GNT4       | -2.52E+00 | 3.84E-03 | 3.71E-02 |
| ENSG00000175264 | CHST1        | -1.17E+00 | 3.85E-03 | 3.71E-02 |
| ENSG00000197779 | ZNF81        | -1.18E+00 | 3.86E-03 | 3.72E-02 |
| ENSG00000286760 | AL022069.3   | -2.73E+00 | 3.96E-03 | 3.78E-02 |
| ENSG00000099910 | KLHL22       | -1.82E+00 | 3.99E-03 | 3.80E-02 |
| ENSG00000277459 | AP001527.2   | -2.80E+00 | 3.99E-03 | 3.80E-02 |
| ENSG00000248712 | CCDC153      | -2.02E+00 | 4.08E-03 | 3.86E-02 |
| ENSG00000172350 | ABCG4        | -3.04E+00 | 4.15E-03 | 3.92E-02 |
| ENSG00000159733 | ZFYVE28      | -2.41E+00 | 4.16E-03 | 3.92E-02 |
| ENSG00000163093 | BBS5         | -1.19E+00 | 4.23E-03 | 3.96E-02 |
| ENSG00000168916 | ZNF608       | -1.08E+00 | 4.28E-03 | 4.00E-02 |
| ENSG00000016391 | CHDH         | -3.28E+00 | 4.34E-03 | 4.04E-02 |
| ENSG00000173156 | RHOD         | -1.57E+00 | 4.38E-03 | 4.07E-02 |
| ENSG00000184916 | JAG2         | -1.40E+00 | 4.39E-03 | 4.07E-02 |
| ENSG00000226287 | TMEM191A     | -1.66E+00 | 4.42E-03 | 4.09E-02 |
| ENSG00000205930 | C21orf62-AS1 | -2.71E+00 | 4.59E-03 | 4.21E-02 |
| ENSG00000168071 | CCDC88B      | -2.07E+00 | 4.65E-03 | 4.25E-02 |
| ENSG00000229276 | REV3L-IT1    | -2.89E+00 | 4.65E-03 | 4.25E-02 |
| ENSG00000273162 | AL133215.2   | -2.17E+00 | 4.68E-03 | 4.26E-02 |
| ENSG00000132623 | ANKEF1       | -1.40E+00 | 4.68E-03 | 4.26E-02 |
| ENSG00000272870 | AC097534.2   | -1.39E+00 | 4.69E-03 | 4.26E-02 |
| ENSG00000261575 | AC005829.1   | -2.57E+00 | 4.69E-03 | 4.26E-02 |
| ENSG00000122367 | LDB3         | -2.26E+00 | 4.72E-03 | 4.28E-02 |
| ENSG00000165121 | AL353743.1   | -1.41E+00 | 4.75E-03 | 4.30E-02 |
| ENSG00000167741 | GGT6         | -3.94E+00 | 4.75E-03 | 4.30E-02 |
| ENSG00000003249 | DBNDD1       | -1.20E+00 | 4.83E-03 | 4.36E-02 |
| ENSG00000108984 | MAP2K6       | -1.90E+00 | 4.89E-03 | 4.40E-02 |
| ENSG00000176222 | ZNF404       | -1.05E+00 | 4.90E-03 | 4.41E-02 |
| ENSG00000261652 | C15orf65     | -2.41E+00 | 4.92E-03 | 4.42E-02 |
| ENSG00000135472 | FAIM2        | -1.67E+00 | 4.97E-03 | 4.44E-02 |
| ENSG00000183486 | MX2          | -1.97E+00 | 5.01E-03 | 4.47E-02 |

|                 |           |           |          |          |
|-----------------|-----------|-----------|----------|----------|
| ENSG00000183648 | NDUFB1    | -1.02E+00 | 5.06E-03 | 4.51E-02 |
| ENSG00000167549 | CORO6     | -1.67E+00 | 5.10E-03 | 4.53E-02 |
| ENSG00000150054 | MPP7      | -2.58E+00 | 5.12E-03 | 4.54E-02 |
| ENSG00000058453 | CROCC     | -1.05E+00 | 5.17E-03 | 4.57E-02 |
| ENSG00000258704 | SRP54-AS1 | -1.42E+00 | 5.28E-03 | 4.63E-02 |
| ENSG00000197943 | PLCG2     | -1.19E+00 | 5.29E-03 | 4.64E-02 |
| ENSG00000142459 | EVI5L     | -1.11E+00 | 5.36E-03 | 4.68E-02 |
| ENSG00000163380 | LMOD3     | -4.95E+00 | 5.46E-03 | 4.74E-02 |
| ENSG00000215910 | C1orf167  | -3.64E+00 | 5.51E-03 | 4.76E-02 |
| ENSG00000162542 | TMCO4     | -1.21E+00 | 5.54E-03 | 4.78E-02 |
| ENSG00000155016 | CYP2U1    | -1.37E+00 | 5.62E-03 | 4.83E-02 |
| ENSG00000171631 | P2RY6     | -1.96E+00 | 5.65E-03 | 4.85E-02 |
| ENSG00000182518 | FAM104B   | -1.02E+00 | 5.68E-03 | 4.87E-02 |
| ENSG00000104833 | TUBB4A    | -1.90E+00 | 5.75E-03 | 4.91E-02 |
| ENSG00000196296 | ATP2A1    | -1.77E+00 | 5.89E-03 | 4.98E-02 |
| ENSG00000268621 | IGFL2-AS1 | -1.38E+00 | 5.90E-03 | 4.99E-02 |
| ENSG00000060566 | CREB3L3   | -3.63E+00 | 5.91E-03 | 4.99E-02 |

**Supplementary table 7. Significant URGs in Ad-KLF4 versus Ad-EGFP transduced samples.**

| Gene ID         | Gene name | Log2(FC) | P value   | FDR       |
|-----------------|-----------|----------|-----------|-----------|
| ENSG00000110651 | CD81      | 2.88E+00 | 0.00E+00  | 0.00E+00  |
| ENSG00000128422 | KRT17     | 8.87E+00 | 0.00E+00  | 0.00E+00  |
| ENSG00000143369 | ECM1      | 3.87E+00 | 0.00E+00  | 0.00E+00  |
| ENSG00000170801 | HTRA3     | 4.99E+00 | 0.00E+00  | 0.00E+00  |
| ENSG00000143320 | CRABP2    | 5.16E+00 | 2.56E-270 | 9.40E-267 |
| ENSG00000101311 | FERMT1    | 7.07E+00 | 2.56E-226 | 7.85E-223 |
| ENSG00000167779 | IGFBP6    | 6.62E+00 | 9.80E-205 | 2.57E-201 |
| ENSG00000136826 | KLF4      | 1.15E+01 | 1.76E-195 | 4.05E-192 |
| ENSG00000197324 | LRP10     | 2.30E+00 | 1.19E-188 | 2.43E-185 |
| ENSG00000006016 | CRLF1     | 5.50E+00 | 6.31E-176 | 1.16E-172 |
| ENSG00000186832 | KRT16     | 1.07E+01 | 2.02E-168 | 3.38E-165 |
| ENSG00000064195 | DLX3      | 5.54E+00 | 4.07E-167 | 6.24E-164 |
| ENSG00000168824 | NSG1      | 7.45E+00 | 1.24E-166 | 1.75E-163 |
| ENSG00000102265 | TIMP1     | 4.87E+00 | 1.76E-163 | 2.32E-160 |
| ENSG00000171246 | NPTX1     | 6.67E+00 | 1.53E-160 | 1.88E-157 |
| ENSG00000181790 | ADGRB1    | 5.85E+00 | 1.79E-158 | 2.05E-155 |
| ENSG00000075618 | FSCN1     | 3.77E+00 | 5.92E-158 | 6.39E-155 |
| ENSG00000168487 | BMP1      | 2.45E+00 | 9.80E-155 | 1.00E-151 |
| ENSG00000172831 | CES2      | 3.07E+00 | 7.11E-153 | 6.87E-150 |
| ENSG00000063660 | GPC1      | 3.00E+00 | 1.51E-151 | 1.38E-148 |
| ENSG00000026297 | RNASET2   | 4.67E+00 | 4.01E-142 | 3.35E-139 |
| ENSG00000102996 | MMP15     | 3.96E+00 | 1.44E-141 | 1.15E-138 |
| ENSG00000140961 | OSGIN1    | 5.12E+00 | 1.66E-139 | 1.22E-136 |
| ENSG00000173801 | JUP       | 4.44E+00 | 2.44E-137 | 1.72E-134 |
| ENSG00000064300 | NGFR      | 4.39E+00 | 4.44E-136 | 3.02E-133 |
| ENSG00000177666 | PNPLA2    | 3.62E+00 | 1.23E-134 | 7.79E-132 |
| ENSG00000139725 | RHOF      | 4.98E+00 | 2.39E-133 | 1.46E-130 |
| ENSG00000206172 | HBA1      | 1.08E+01 | 9.14E-132 | 5.41E-129 |
| ENSG00000058668 | ATP2B4    | 3.60E+00 | 2.53E-130 | 1.45E-127 |
| ENSG00000124102 | PI3       | 1.08E+01 | 1.66E-129 | 9.23E-127 |
| ENSG00000135723 | FHOD1     | 3.42E+00 | 2.82E-124 | 1.52E-121 |
| ENSG00000063245 | EPN1      | 2.40E+00 | 2.87E-121 | 1.47E-118 |
| ENSG00000151176 | PLBD2     | 3.12E+00 | 3.04E-121 | 1.51E-118 |
| ENSG00000105397 | TYK2      | 2.84E+00 | 3.09E-120 | 1.49E-117 |
| ENSG00000100036 | SLC35E4   | 3.60E+00 | 4.79E-120 | 2.26E-117 |
| ENSG00000168140 | VASN      | 2.08E+00 | 5.99E-120 | 2.75E-117 |
| ENSG00000178053 | MLF1      | 3.47E+00 | 1.21E-118 | 5.42E-116 |
| ENSG00000197746 | PSAP      | 1.33E+00 | 1.36E-118 | 5.95E-116 |

|                 |          |          |           |           |
|-----------------|----------|----------|-----------|-----------|
| ENSG00000112378 | PERP     | 3.38E+00 | 2.61E-118 | 1.11E-115 |
| ENSG00000013588 | GPRC5A   | 2.76E+00 | 1.53E-117 | 6.40E-115 |
| ENSG00000008513 | ST3GAL1  | 4.19E+00 | 5.42E-113 | 2.12E-110 |
| ENSG00000169093 | ASMTL    | 2.63E+00 | 7.96E-113 | 3.05E-110 |
| ENSG00000109062 | SLC9A3R1 | 2.33E+00 | 5.74E-112 | 2.15E-109 |
| ENSG00000172270 | BSG      | 2.85E+00 | 2.02E-110 | 7.44E-108 |
| ENSG00000134531 | EMP1     | 5.81E+00 | 8.46E-109 | 3.05E-106 |
| ENSG00000140941 | MAP1LC3B | 2.28E+00 | 2.93E-108 | 1.04E-105 |
| ENSG00000035862 | TIMP2    | 2.13E+00 | 2.34E-105 | 8.12E-103 |
| ENSG00000198768 | APCDD1L  | 3.07E+00 | 1.49E-104 | 4.96E-102 |
| ENSG00000124831 | LRRFIP1  | 2.51E+00 | 4.79E-104 | 1.57E-101 |
| ENSG00000184185 | KCNJ12   | 5.49E+00 | 1.82E-102 | 5.87E-100 |
| ENSG00000092068 | SLC7A8   | 6.36E+00 | 1.46E-96  | 4.54E-94  |
| ENSG00000173546 | CSPG4    | 2.91E+00 | 3.67E-96  | 1.12E-93  |
| ENSG00000205420 | KRT6A    | 1.46E+01 | 4.36E-96  | 1.31E-93  |
| ENSG00000089060 | SLC8B1   | 4.34E+00 | 6.13E-96  | 1.82E-93  |
| ENSG00000142627 | EPHA2    | 3.39E+00 | 2.14E-95  | 6.23E-93  |
| ENSG00000179348 | GATA2    | 3.51E+00 | 4.07E-95  | 1.17E-92  |
| ENSG00000149679 | CABLES2  | 2.30E+00 | 9.01E-94  | 2.55E-91  |
| ENSG00000175866 | BAIAP2   | 2.50E+00 | 2.48E-93  | 6.81E-91  |
| ENSG00000085978 | ATG16L1  | 3.22E+00 | 1.28E-92  | 3.47E-90  |
| ENSG00000184489 | PTP4A3   | 6.03E+00 | 1.47E-92  | 3.91E-90  |
| ENSG00000204248 | COL11A2  | 7.06E+00 | 1.16E-91  | 3.05E-89  |
| ENSG00000221988 | PPT2     | 2.53E+00 | 1.36E-90  | 3.52E-88  |
| ENSG00000066248 | NGEF     | 7.48E+00 | 1.63E-90  | 4.17E-88  |
| ENSG00000167470 | MIDN     | 2.39E+00 | 3.62E-90  | 9.12E-88  |
| ENSG00000130821 | SLC6A8   | 2.64E+00 | 1.05E-89  | 2.60E-87  |
| ENSG00000166165 | CKB      | 3.30E+00 | 3.47E-88  | 8.40E-86  |
| ENSG00000179403 | VWA1     | 3.00E+00 | 3.58E-88  | 8.54E-86  |
| ENSG00000165272 | AQP3     | 6.63E+00 | 4.02E-87  | 9.34E-85  |
| ENSG00000173868 | PHOSPHO1 | 5.98E+00 | 3.11E-86  | 7.14E-84  |
| ENSG00000100994 | PYGB     | 2.00E+00 | 1.99E-85  | 4.52E-83  |
| ENSG00000148180 | GSN      | 2.96E+00 | 7.97E-85  | 1.79E-82  |
| ENSG00000104783 | KCNN4    | 6.49E+00 | 6.59E-83  | 1.44E-80  |
| ENSG00000185896 | LAMP1    | 1.40E+00 | 1.12E-82  | 2.42E-80  |
| ENSG00000154370 | TRIM11   | 2.89E+00 | 8.08E-82  | 1.73E-79  |
| ENSG00000125730 | C3       | 5.67E+00 | 1.20E-81  | 2.54E-79  |
| ENSG00000197457 | STMN3    | 3.38E+00 | 2.14E-81  | 4.47E-79  |
| ENSG00000143162 | CREG1    | 2.94E+00 | 3.88E-81  | 8.00E-79  |
| ENSG00000070404 | FSTL3    | 3.12E+00 | 4.79E-81  | 9.78E-79  |



|                 |         |          |          |          |
|-----------------|---------|----------|----------|----------|
| ENSG00000034152 | MAP2K3  | 2.22E+00 | 6.28E-81 | 1.27E-78 |
| ENSG00000109787 | KLF3    | 4.01E+00 | 2.27E-79 | 4.49E-77 |
| ENSG00000133466 | C1QTNF6 | 3.26E+00 | 3.70E-79 | 7.24E-77 |
| ENSG00000141232 | TOB1    | 2.37E+00 | 3.80E-79 | 7.35E-77 |
| ENSG00000272398 | CD24    | 6.32E+00 | 5.12E-79 | 9.79E-77 |
| ENSG00000204103 | MAFB    | 4.20E+00 | 7.89E-79 | 1.50E-76 |
| ENSG00000079385 | CEACAM1 | 6.49E+00 | 1.91E-78 | 3.58E-76 |
| ENSG00000110090 | CPT1A   | 2.89E+00 | 1.78E-77 | 3.31E-75 |
| ENSG00000188643 | S100A16 | 5.31E+00 | 2.27E-77 | 4.13E-75 |
| ENSG00000055118 | KCNH2   | 6.21E+00 | 1.31E-76 | 2.37E-74 |
| ENSG00000110400 | NECTIN1 | 3.77E+00 | 5.34E-76 | 9.52E-74 |
| ENSG00000169783 | LINGO1  | 4.49E+00 | 1.42E-75 | 2.50E-73 |
| ENSG00000178209 | PLEC    | 3.24E+00 | 2.21E-75 | 3.87E-73 |
| ENSG00000099875 | MKNK2   | 2.07E+00 | 2.41E-75 | 4.17E-73 |
| ENSG00000155090 | KLF10   | 2.44E+00 | 9.65E-75 | 1.64E-72 |
| ENSG00000092295 | TGM1    | 5.45E+00 | 5.63E-74 | 9.49E-72 |
| ENSG00000092758 | COL9A3  | 4.43E+00 | 6.28E-74 | 1.05E-71 |
| ENSG00000169583 | CLIC3   | 5.35E+00 | 9.91E-72 | 1.64E-69 |
| ENSG00000104879 | CKM     | 1.06E+01 | 1.84E-69 | 2.93E-67 |
| ENSG00000076356 | PLXNA2  | 5.48E+00 | 3.43E-69 | 5.44E-67 |
| ENSG00000196352 | CD55    | 4.45E+00 | 5.24E-69 | 8.22E-67 |
| ENSG00000116260 | QSOX1   | 2.08E+00 | 6.19E-69 | 9.64E-67 |
| ENSG00000162040 | HS3ST6  | 8.09E+00 | 6.43E-69 | 9.93E-67 |
| ENSG00000135926 | TMBIM1  | 3.04E+00 | 2.27E-68 | 3.44E-66 |
| ENSG00000196878 | LAMB3   | 4.30E+00 | 5.08E-68 | 7.66E-66 |
| ENSG00000204539 | CDSN    | 1.24E+01 | 7.78E-68 | 1.16E-65 |
| ENSG00000117984 | CTSD    | 2.77E+00 | 1.43E-67 | 2.10E-65 |
| ENSG00000240583 | AQP1    | 9.68E+00 | 1.74E-67 | 2.54E-65 |
| ENSG00000101187 | SLCO4A1 | 3.86E+00 | 5.29E-67 | 7.66E-65 |
| ENSG00000143631 | FLG     | 1.16E+01 | 7.60E-67 | 1.09E-64 |
| ENSG00000010278 | CD9     | 3.13E+00 | 7.71E-67 | 1.10E-64 |
| ENSG00000167157 | PRRX2   | 4.32E+00 | 1.52E-66 | 2.15E-64 |
| ENSG00000105427 | CNFN    | 3.84E+00 | 1.75E-66 | 2.45E-64 |
| ENSG00000120675 | DNAJC15 | 4.52E+00 | 1.98E-66 | 2.75E-64 |
| ENSG00000083454 | P2RX5   | 3.54E+00 | 1.49E-65 | 2.06E-63 |
| ENSG00000105355 | PLIN3   | 2.59E+00 | 2.80E-65 | 3.84E-63 |
| ENSG00000147676 | MAL2    | 6.71E+00 | 5.43E-65 | 7.39E-63 |
| ENSG00000167600 | CYP2S1  | 3.48E+00 | 6.19E-65 | 8.36E-63 |
| ENSG00000104805 | NUCB1   | 2.75E+00 | 6.42E-65 | 8.61E-63 |
| ENSG00000260458 | KCNJ18  | 1.22E+01 | 6.59E-65 | 8.77E-63 |

|                 |          |          |          |          |
|-----------------|----------|----------|----------|----------|
| ENSG00000124942 | AHNAK    | 2.89E+00 | 8.72E-65 | 1.14E-62 |
| ENSG00000111684 | LPCAT3   | 2.25E+00 | 1.35E-64 | 1.77E-62 |
| ENSG00000197976 | AKAP17A  | 2.18E+00 | 3.34E-64 | 4.32E-62 |
| ENSG00000101782 | RIOK3    | 2.47E+00 | 4.29E-64 | 5.51E-62 |
| ENSG00000130513 | GDF15    | 3.31E+00 | 4.36E-64 | 5.57E-62 |
| ENSG00000164530 | PI16     | 1.10E+01 | 2.16E-63 | 2.72E-61 |
| ENSG00000159720 | ATP6V0D1 | 1.65E+00 | 3.42E-63 | 4.27E-61 |
| ENSG00000188536 | HBA2     | 1.21E+01 | 6.59E-63 | 8.07E-61 |
| ENSG00000173327 | MAP3K11  | 2.10E+00 | 8.23E-63 | 1.00E-60 |
| ENSG00000129757 | CDKN1C   | 5.38E+00 | 8.60E-63 | 1.04E-60 |
| ENSG00000136802 | LRRC8A   | 2.11E+00 | 8.81E-63 | 1.06E-60 |
| ENSG00000102034 | ELF4     | 2.54E+00 | 3.28E-62 | 3.91E-60 |
| ENSG00000008710 | PKD1     | 2.24E+00 | 8.28E-62 | 9.81E-60 |
| ENSG00000185000 | DGAT1    | 2.75E+00 | 2.64E-61 | 3.11E-59 |
| ENSG00000090776 | EFNB1    | 2.98E+00 | 3.28E-61 | 3.84E-59 |
| ENSG00000076826 | CAMSAP3  | 5.16E+00 | 3.43E-61 | 3.99E-59 |
| ENSG00000163993 | S100P    | 1.21E+01 | 5.07E-61 | 5.86E-59 |
| ENSG00000130702 | LAMA5    | 2.75E+00 | 8.89E-61 | 1.01E-58 |
| ENSG00000148671 | ADIRF    | 8.04E+00 | 1.01E-60 | 1.15E-58 |
| ENSG00000148346 | LCN2     | 9.68E+00 | 4.49E-60 | 5.00E-58 |
| ENSG00000103089 | FA2H     | 9.75E+00 | 4.75E-60 | 5.26E-58 |
| ENSG00000185507 | IRF7     | 3.30E+00 | 5.57E-60 | 6.13E-58 |
| ENSG00000085741 | WNT11    | 4.69E+00 | 8.31E-60 | 9.09E-58 |
| ENSG00000111341 | MGP      | 7.64E+00 | 1.01E-59 | 1.08E-57 |
| ENSG00000157227 | MMP14    | 2.71E+00 | 1.01E-59 | 1.08E-57 |
| ENSG00000114854 | TNNC1    | 7.41E+00 | 1.65E-59 | 1.76E-57 |
| ENSG00000139433 | GLTP     | 2.33E+00 | 6.44E-59 | 6.80E-57 |
| ENSG00000148120 | AOPEP    | 2.44E+00 | 1.17E-58 | 1.23E-56 |
| ENSG00000096696 | DSP      | 3.81E+00 | 2.09E-58 | 2.18E-56 |
| ENSG00000124107 | SLPI     | 7.15E+00 | 2.40E-58 | 2.49E-56 |
| ENSG00000118640 | VAMP8    | 5.30E+00 | 4.14E-58 | 4.27E-56 |
| ENSG00000143375 | CGN      | 4.66E+00 | 5.15E-58 | 5.29E-56 |
| ENSG00000168056 | LTBP3    | 2.79E+00 | 9.38E-58 | 9.58E-56 |
| ENSG00000100504 | PYGL     | 1.75E+00 | 1.98E-57 | 2.00E-55 |
| ENSG00000116701 | NCF2     | 9.53E+00 | 2.03E-57 | 2.04E-55 |
| ENSG00000128564 | VGf      | 4.97E+00 | 4.68E-57 | 4.65E-55 |
| ENSG00000186806 | VSIG10L  | 5.51E+00 | 5.33E-57 | 5.27E-55 |
| ENSG00000107731 | UNC5B    | 4.77E+00 | 6.72E-57 | 6.61E-55 |
| ENSG00000065618 | COL17A1  | 1.06E+01 | 9.67E-57 | 9.45E-55 |
| ENSG00000138623 | SEMA7A   | 3.94E+00 | 6.17E-56 | 5.90E-54 |

|                 |         |          |          |          |
|-----------------|---------|----------|----------|----------|
| ENSG00000197766 | CFD     | 6.46E+00 | 7.52E-56 | 7.16E-54 |
| ENSG00000160111 | CPAMD8  | 7.04E+00 | 8.28E-56 | 7.84E-54 |
| ENSG00000175793 | SFN     | 6.94E+00 | 1.69E-55 | 1.59E-53 |
| ENSG00000116017 | ARID3A  | 3.18E+00 | 1.84E-54 | 1.68E-52 |
| ENSG00000001617 | SEMA3F  | 4.42E+00 | 2.60E-54 | 2.37E-52 |
| ENSG00000124145 | SDC4    | 2.02E+00 | 2.70E-54 | 2.45E-52 |
| ENSG00000123992 | DNPEP   | 2.34E+00 | 6.61E-54 | 5.87E-52 |
| ENSG00000158769 | F11R    | 3.22E+00 | 8.73E-54 | 7.71E-52 |
| ENSG00000187954 | CYHR1   | 1.84E+00 | 7.10E-53 | 6.24E-51 |
| ENSG00000078902 | TOLLIP  | 1.85E+00 | 1.04E-52 | 9.08E-51 |
| ENSG00000167778 | SPRYD3  | 3.19E+00 | 2.05E-52 | 1.78E-50 |
| ENSG00000104888 | SLC17A7 | 3.79E+00 | 2.96E-52 | 2.54E-50 |
| ENSG00000124762 | CDKN1A  | 2.10E+00 | 3.02E-52 | 2.58E-50 |
| ENSG00000084733 | RAB10   | 1.58E+00 | 5.87E-52 | 4.97E-50 |
| ENSG00000030582 | GRN     | 1.75E+00 | 2.07E-51 | 1.74E-49 |
| ENSG00000115758 | ODC1    | 1.39E+00 | 2.42E-51 | 2.02E-49 |
| ENSG00000092820 | EZR     | 1.51E+00 | 6.42E-51 | 5.34E-49 |
| ENSG00000112139 | MDGA1   | 4.29E+00 | 6.80E-51 | 5.61E-49 |
| ENSG00000115762 | PLEKHB2 | 1.83E+00 | 7.03E-51 | 5.77E-49 |
| ENSG00000175084 | DES     | 1.02E+01 | 1.04E-50 | 8.45E-49 |
| ENSG00000187531 | SIRT7   | 2.60E+00 | 1.31E-50 | 1.06E-48 |
| ENSG00000093167 | LRRFIP2 | 2.12E+00 | 1.41E-50 | 1.14E-48 |
| ENSG00000167642 | SPINT2  | 6.11E+00 | 1.96E-50 | 1.57E-48 |
| ENSG00000131037 | EPS8L1  | 4.07E+00 | 1.99E-50 | 1.59E-48 |
| ENSG00000068305 | MEF2A   | 2.09E+00 | 2.71E-50 | 2.15E-48 |
| ENSG00000116661 | FBXO2   | 3.70E+00 | 5.36E-50 | 4.23E-48 |
| ENSG00000117525 | F3      | 2.91E+00 | 7.77E-50 | 6.10E-48 |
| ENSG00000128274 | A4GALT  | 3.46E+00 | 1.56E-49 | 1.22E-47 |
| ENSG00000148344 | PTGES   | 5.04E+00 | 4.51E-49 | 3.51E-47 |
| ENSG00000176531 | PHLDB3  | 3.23E+00 | 6.43E-49 | 4.99E-47 |
| ENSG00000129437 | KLK14   | 1.10E+01 | 1.40E-48 | 1.08E-46 |
| ENSG00000167487 | KLHL26  | 4.24E+00 | 2.18E-48 | 1.67E-46 |
| ENSG00000130656 | HBZ     | 7.71E+00 | 2.43E-48 | 1.84E-46 |
| ENSG00000122756 | CNTFR   | 3.76E+00 | 2.56E-48 | 1.93E-46 |
| ENSG00000074416 | MGLL    | 4.61E+00 | 2.68E-48 | 2.02E-46 |
| ENSG00000182759 | MAFA    | 3.77E+00 | 3.18E-48 | 2.39E-46 |
| ENSG00000129451 | KLK10   | 9.74E+00 | 9.48E-48 | 7.02E-46 |
| ENSG00000186529 | CYP4F3  | 7.52E+00 | 1.04E-47 | 7.70E-46 |
| ENSG00000162545 | CAMK2N1 | 2.41E+00 | 1.51E-47 | 1.11E-45 |
| ENSG00000185022 | MAFF    | 3.24E+00 | 1.61E-47 | 1.18E-45 |

|                 |         |          |          |          |
|-----------------|---------|----------|----------|----------|
| ENSG00000163961 | RNF168  | 1.89E+00 | 2.48E-47 | 1.81E-45 |
| ENSG00000171159 | C9orf16 | 3.55E+00 | 3.62E-47 | 2.63E-45 |
| ENSG00000177335 | C8orf31 | 5.90E+00 | 5.79E-47 | 4.17E-45 |
| ENSG00000168918 | INPP5D  | 5.45E+00 | 6.49E-47 | 4.66E-45 |
| ENSG00000138594 | TMOD3   | 1.51E+00 | 6.76E-47 | 4.83E-45 |
| ENSG00000144476 | ACKR3   | 9.70E+00 | 7.87E-47 | 5.58E-45 |
| ENSG00000135932 | CAB39   | 1.83E+00 | 1.06E-46 | 7.43E-45 |
| ENSG00000169403 | PTAFR   | 5.82E+00 | 1.18E-46 | 8.25E-45 |
| ENSG00000149218 | ENDOD1  | 3.98E+00 | 4.42E-46 | 3.07E-44 |
| ENSG00000160293 | VAV2    | 2.18E+00 | 5.01E-46 | 3.46E-44 |
| ENSG00000130402 | ACTN4   | 1.57E+00 | 1.63E-45 | 1.12E-43 |
| ENSG00000183255 | PTTG1IP | 1.61E+00 | 2.65E-45 | 1.81E-43 |
| ENSG00000147804 | SLC39A4 | 1.01E+01 | 2.73E-45 | 1.86E-43 |
| ENSG00000075043 | KCNQ2   | 4.83E+00 | 5.70E-45 | 3.82E-43 |
| ENSG00000173442 | EHBP1L1 | 2.70E+00 | 5.79E-45 | 3.87E-43 |
| ENSG00000116717 | GADD45A | 1.93E+00 | 7.58E-45 | 5.04E-43 |
| ENSG00000157483 | MYO1E   | 2.26E+00 | 1.48E-44 | 9.73E-43 |
| ENSG00000105287 | PRKD2   | 1.86E+00 | 1.51E-44 | 9.92E-43 |
| ENSG00000184502 | GAST    | 1.05E+01 | 1.80E-44 | 1.18E-42 |
| ENSG00000173846 | PLK3    | 3.04E+00 | 1.82E-44 | 1.19E-42 |
| ENSG00000012171 | SEMA3B  | 4.38E+00 | 2.12E-44 | 1.37E-42 |
| ENSG00000042445 | RETSAT  | 1.97E+00 | 3.28E-44 | 2.12E-42 |
| ENSG00000169442 | CD52    | 1.06E+01 | 3.77E-44 | 2.43E-42 |
| ENSG00000138944 | SHISAL1 | 4.06E+00 | 3.86E-44 | 2.48E-42 |
| ENSG00000167656 | LY6D    | 9.97E+00 | 4.34E-44 | 2.78E-42 |
| ENSG00000115738 | ID2     | 6.38E+00 | 4.94E-44 | 3.15E-42 |
| ENSG00000188064 | WNT7B   | 5.67E+00 | 4.95E-44 | 3.15E-42 |
| ENSG00000137699 | TRIM29  | 9.29E+00 | 8.39E-44 | 5.30E-42 |
| ENSG00000109846 | CRYAB   | 7.03E+00 | 9.43E-44 | 5.94E-42 |
| ENSG00000125968 | ID1     | 2.53E+00 | 9.85E-44 | 6.18E-42 |
| ENSG00000105519 | CAPS    | 6.74E+00 | 1.21E-43 | 7.55E-42 |
| ENSG00000142156 | COL6A1  | 1.87E+00 | 1.39E-43 | 8.63E-42 |
| ENSG00000112576 | CCND3   | 1.74E+00 | 1.89E-43 | 1.17E-41 |
| ENSG00000099337 | KCNK6   | 3.01E+00 | 3.25E-43 | 2.00E-41 |
| ENSG00000100605 | ITPK1   | 3.60E+00 | 4.08E-43 | 2.51E-41 |
| ENSG00000174307 | PHLDA3  | 2.84E+00 | 4.14E-43 | 2.54E-41 |
| ENSG00000085552 | IGSF9   | 4.51E+00 | 4.62E-43 | 2.82E-41 |
| ENSG00000140937 | CDH11   | 2.22E+00 | 4.65E-43 | 2.83E-41 |
| ENSG00000087510 | TFAP2C  | 3.10E+00 | 4.67E-43 | 2.83E-41 |
| ENSG00000178381 | ZFAND2A | 3.19E+00 | 8.42E-43 | 5.05E-41 |

|                 |           |          |          |          |
|-----------------|-----------|----------|----------|----------|
| ENSG00000164236 | ANKRD33B  | 2.71E+00 | 1.16E-42 | 6.93E-41 |
| ENSG00000177542 | SLC25A22  | 3.12E+00 | 1.63E-42 | 9.64E-41 |
| ENSG00000109089 | CDR2L     | 1.60E+00 | 1.66E-42 | 9.77E-41 |
| ENSG00000101210 | EEF1A2    | 2.63E+00 | 4.71E-42 | 2.75E-40 |
| ENSG00000171401 | KRT13     | 9.79E+00 | 4.94E-42 | 2.87E-40 |
| ENSG00000225783 | MIAT      | 5.34E+00 | 6.50E-42 | 3.77E-40 |
| ENSG00000172667 | ZMAT3     | 1.96E+00 | 7.04E-42 | 4.06E-40 |
| ENSG00000095932 | SMIM24    | 7.55E+00 | 7.25E-42 | 4.17E-40 |
| ENSG00000130589 | HELZ2     | 2.33E+00 | 9.45E-42 | 5.41E-40 |
| ENSG00000156453 | PCDH1     | 7.24E+00 | 9.48E-42 | 5.41E-40 |
| ENSG00000139722 | VPS37B    | 1.92E+00 | 1.07E-41 | 6.09E-40 |
| ENSG00000147689 | FAM83A    | 5.29E+00 | 1.23E-41 | 6.96E-40 |
| ENSG00000158050 | DUSP2     | 4.97E+00 | 1.32E-41 | 7.45E-40 |
| ENSG00000124216 | SNAI1     | 1.42E+00 | 1.79E-41 | 1.00E-39 |
| ENSG00000010438 | PRSS3     | 4.59E+00 | 1.82E-41 | 1.02E-39 |
| ENSG00000204866 | IGFL2     | 7.72E+00 | 1.85E-41 | 1.03E-39 |
| ENSG00000061938 | TNK2      | 2.30E+00 | 2.31E-41 | 1.29E-39 |
| ENSG00000186854 | TRABD2A   | 3.33E+00 | 2.60E-41 | 1.44E-39 |
| ENSG00000162413 | KLHL21    | 2.22E+00 | 4.38E-41 | 2.42E-39 |
| ENSG00000099204 | ABLIM1    | 2.60E+00 | 6.69E-41 | 3.67E-39 |
| ENSG00000274180 | NATD1     | 4.89E+00 | 9.30E-41 | 5.07E-39 |
| ENSG00000176845 | METRNL    | 2.11E+00 | 9.51E-41 | 5.17E-39 |
| ENSG00000015413 | DPEP1     | 9.81E+00 | 9.59E-41 | 5.20E-39 |
| ENSG00000105048 | TNNT1     | 3.03E+00 | 1.01E-40 | 5.48E-39 |
| ENSG00000196154 | S100A4    | 4.55E+00 | 1.08E-40 | 5.83E-39 |
| ENSG00000135679 | MDM2      | 2.08E+00 | 1.88E-40 | 1.00E-38 |
| ENSG00000032444 | PNPLA6    | 1.53E+00 | 1.95E-40 | 1.04E-38 |
| ENSG00000179148 | ALOXE3    | 8.39E+00 | 2.24E-40 | 1.19E-38 |
| ENSG00000225968 | ELFN1     | 3.03E+00 | 2.42E-40 | 1.29E-38 |
| ENSG00000108433 | GOSR2     | 1.63E+00 | 2.74E-40 | 1.45E-38 |
| ENSG00000253368 | TRNP1     | 3.38E+00 | 4.35E-40 | 2.30E-38 |
| ENSG00000103056 | SMPD3     | 5.23E+00 | 5.27E-40 | 2.76E-38 |
| ENSG00000131620 | ANO1      | 6.55E+00 | 5.32E-40 | 2.78E-38 |
| ENSG00000149782 | PLCB3     | 2.34E+00 | 7.14E-40 | 3.72E-38 |
| ENSG00000170100 | ZNF778    | 2.49E+00 | 1.34E-39 | 6.94E-38 |
| ENSG00000198576 | ARC       | 7.24E+00 | 2.85E-39 | 1.46E-37 |
| ENSG00000173530 | TNFRSF10D | 2.19E+00 | 2.87E-39 | 1.47E-37 |
| ENSG00000166925 | TSC22D4   | 1.77E+00 | 3.14E-39 | 1.60E-37 |
| ENSG00000104419 | NDRG1     | 2.14E+00 | 4.58E-39 | 2.32E-37 |
| ENSG00000114771 | AADAC     | 4.29E+00 | 4.67E-39 | 2.36E-37 |

|                 |          |          |          |          |
|-----------------|----------|----------|----------|----------|
| ENSG00000168389 | MFSD2A   | 2.04E+00 | 6.02E-39 | 3.02E-37 |
| ENSG00000128567 | PODXL    | 2.57E+00 | 6.78E-39 | 3.40E-37 |
| ENSG00000144452 | ABCA12   | 5.86E+00 | 8.81E-39 | 4.37E-37 |
| ENSG00000182492 | BGN      | 2.66E+00 | 8.84E-39 | 4.38E-37 |
| ENSG00000152377 | SPOCK1   | 3.16E+00 | 1.10E-38 | 5.42E-37 |
| ENSG00000185112 | FAM43A   | 2.55E+00 | 1.16E-38 | 5.70E-37 |
| ENSG00000196361 | ELAVL3   | 5.21E+00 | 1.18E-38 | 5.79E-37 |
| ENSG00000184640 | SEPTIN9  | 1.47E+00 | 1.23E-38 | 6.00E-37 |
| ENSG00000171551 | ECEL1    | 5.93E+00 | 1.35E-38 | 6.59E-37 |
| ENSG00000148331 | ASB6     | 2.24E+00 | 1.85E-38 | 9.01E-37 |
| ENSG00000178951 | ZBTB7A   | 1.68E+00 | 2.07E-38 | 1.01E-36 |
| ENSG00000160691 | SHC1     | 1.15E+00 | 2.34E-38 | 1.13E-36 |
| ENSG00000171206 | TRIM8    | 1.85E+00 | 2.41E-38 | 1.16E-36 |
| ENSG00000172005 | MAL      | 9.42E+00 | 3.05E-38 | 1.47E-36 |
| ENSG00000141524 | TMC6     | 3.17E+00 | 4.12E-38 | 1.98E-36 |
| ENSG00000148426 | PROSER2  | 3.16E+00 | 5.56E-38 | 2.65E-36 |
| ENSG00000176903 | PNMA1    | 1.64E+00 | 6.48E-38 | 3.08E-36 |
| ENSG00000148411 | NACC2    | 1.84E+00 | 8.17E-38 | 3.87E-36 |
| ENSG00000123384 | LRP1     | 2.83E+00 | 8.20E-38 | 3.88E-36 |
| ENSG00000168993 | CPLX1    | 7.90E+00 | 9.82E-38 | 4.62E-36 |
| ENSG00000143217 | NECTIN4  | 3.55E+00 | 9.86E-38 | 4.63E-36 |
| ENSG00000163110 | PDLIM5   | 1.15E+00 | 1.03E-37 | 4.84E-36 |
| ENSG00000103175 | WFDC1    | 8.72E+00 | 1.10E-37 | 5.13E-36 |
| ENSG00000185215 | TNFAIP2  | 1.95E+00 | 1.10E-37 | 5.13E-36 |
| ENSG00000197461 | PDGFA    | 2.11E+00 | 1.20E-37 | 5.59E-36 |
| ENSG00000130203 | APOE     | 3.45E+00 | 1.71E-37 | 7.89E-36 |
| ENSG00000109321 | AREG     | 4.65E+00 | 1.96E-37 | 9.03E-36 |
| ENSG00000140545 | MFGE8    | 2.02E+00 | 2.42E-37 | 1.11E-35 |
| ENSG00000167757 | KLK11    | 9.05E+00 | 2.62E-37 | 1.20E-35 |
| ENSG00000141580 | WDR45B   | 1.76E+00 | 2.83E-37 | 1.29E-35 |
| ENSG00000172478 | MAB21L4  | 9.28E+00 | 2.86E-37 | 1.30E-35 |
| ENSG00000205336 | ADGRG1   | 2.59E+00 | 2.96E-37 | 1.35E-35 |
| ENSG00000140368 | PSTPIP1  | 9.48E+00 | 3.03E-37 | 1.37E-35 |
| ENSG00000101421 | CHMP4B   | 1.19E+00 | 3.53E-37 | 1.60E-35 |
| ENSG00000100092 | SH3BP1   | 2.89E+00 | 4.03E-37 | 1.82E-35 |
| ENSG00000117868 | ESYT2    | 1.63E+00 | 4.61E-37 | 2.07E-35 |
| ENSG00000102901 | CENPT    | 1.74E+00 | 6.12E-37 | 2.74E-35 |
| ENSG00000131389 | SLC6A6   | 2.03E+00 | 6.23E-37 | 2.78E-35 |
| ENSG00000142669 | SH3BGRL3 | 2.14E+00 | 7.96E-37 | 3.54E-35 |
| ENSG00000188910 | GJB3     | 8.67E+00 | 1.04E-36 | 4.61E-35 |

|                 |          |          |          |          |
|-----------------|----------|----------|----------|----------|
| ENSG00000179477 | ALOX12B  | 7.60E+00 | 1.26E-36 | 5.55E-35 |
| ENSG00000185567 | AHNAK2   | 4.99E+00 | 1.26E-36 | 5.57E-35 |
| ENSG00000110092 | CCND1    | 2.34E+00 | 1.42E-36 | 6.23E-35 |
| ENSG00000028277 | POU2F2   | 3.22E+00 | 2.67E-36 | 1.16E-34 |
| ENSG00000063322 | MED29    | 1.87E+00 | 2.77E-36 | 1.20E-34 |
| ENSG00000166592 | RRAD     | 2.11E+00 | 2.83E-36 | 1.22E-34 |
| ENSG00000059728 | MXD1     | 2.97E+00 | 2.84E-36 | 1.22E-34 |
| ENSG00000038427 | VCAN     | 3.19E+00 | 3.03E-36 | 1.30E-34 |
| ENSG00000138069 | RAB1A    | 1.38E+00 | 3.43E-36 | 1.47E-34 |
| ENSG00000167748 | KLK1     | 8.98E+00 | 4.64E-36 | 1.99E-34 |
| ENSG00000169710 | FASN     | 2.21E+00 | 1.10E-35 | 4.67E-34 |
| ENSG00000125775 | SDCBP2   | 4.08E+00 | 1.26E-35 | 5.32E-34 |
| ENSG00000077463 | SIRT6    | 3.06E+00 | 1.47E-35 | 6.21E-34 |
| ENSG00000139626 | ITGB7    | 7.98E+00 | 1.51E-35 | 6.36E-34 |
| ENSG00000160685 | ZBTB7B   | 2.60E+00 | 1.90E-35 | 7.94E-34 |
| ENSG00000179335 | CLK3     | 1.63E+00 | 1.93E-35 | 8.05E-34 |
| ENSG00000176393 | RNPEP    | 1.92E+00 | 2.20E-35 | 9.14E-34 |
| ENSG00000095203 | EPB41L4B | 3.40E+00 | 2.40E-35 | 9.96E-34 |
| ENSG00000101057 | MYBL2    | 1.41E+00 | 2.96E-35 | 1.22E-33 |
| ENSG00000158792 | SPATA2L  | 2.89E+00 | 3.25E-35 | 1.34E-33 |
| ENSG00000134504 | KCTD1    | 2.08E+00 | 5.28E-35 | 2.17E-33 |
| ENSG00000171368 | TPPP     | 5.95E+00 | 6.36E-35 | 2.61E-33 |
| ENSG00000100647 | SUSD6    | 2.32E+00 | 6.90E-35 | 2.82E-33 |
| ENSG00000130766 | SESN2    | 2.11E+00 | 6.97E-35 | 2.85E-33 |
| ENSG00000136068 | FLNB     | 1.85E+00 | 7.99E-35 | 3.26E-33 |
| ENSG00000159733 | ZFYVE28  | 5.63E+00 | 9.24E-35 | 3.75E-33 |
| ENSG00000188112 | C6orf132 | 4.91E+00 | 9.33E-35 | 3.78E-33 |
| ENSG00000169635 | HIC2     | 2.71E+00 | 1.01E-34 | 4.10E-33 |
| ENSG00000156671 | SAMD8    | 2.20E+00 | 1.04E-34 | 4.21E-33 |
| ENSG00000189114 | BLOC1S3  | 2.50E+00 | 1.21E-34 | 4.88E-33 |
| ENSG00000148339 | SLC25A25 | 1.96E+00 | 1.55E-34 | 6.22E-33 |
| ENSG00000131069 | ACSS2    | 2.32E+00 | 1.64E-34 | 6.55E-33 |
| ENSG00000135636 | DYSF     | 3.20E+00 | 1.83E-34 | 7.31E-33 |
| ENSG00000203485 | INF2     | 2.02E+00 | 1.91E-34 | 7.62E-33 |
| ENSG00000079308 | TNS1     | 3.09E+00 | 2.60E-34 | 1.04E-32 |
| ENSG00000071553 | ATP6AP1  | 1.38E+00 | 2.98E-34 | 1.18E-32 |
| ENSG00000188783 | PRELP    | 8.31E+00 | 3.14E-34 | 1.24E-32 |
| ENSG00000006712 | PAF1     | 1.23E+00 | 3.83E-34 | 1.51E-32 |
| ENSG00000163286 | ALPG     | 8.75E+00 | 3.97E-34 | 1.56E-32 |
| ENSG00000167759 | KLK13    | 8.78E+00 | 4.57E-34 | 1.79E-32 |

|                 |          |          |          |          |
|-----------------|----------|----------|----------|----------|
| ENSG00000088826 | SMOX     | 2.43E+00 | 5.39E-34 | 2.11E-32 |
| ENSG00000011347 | SYT7     | 3.44E+00 | 6.85E-34 | 2.67E-32 |
| ENSG00000119801 | YPEL5    | 2.06E+00 | 7.75E-34 | 3.01E-32 |
| ENSG00000261678 | SCRT1    | 8.75E+00 | 8.54E-34 | 3.31E-32 |
| ENSG00000101076 | HNF4A    | 8.65E+00 | 1.38E-33 | 5.31E-32 |
| ENSG00000188338 | SLC38A3  | 2.47E+00 | 1.41E-33 | 5.42E-32 |
| ENSG00000133328 | PLAAT2   | 9.10E+00 | 1.48E-33 | 5.67E-32 |
| ENSG00000119862 | LGALSL   | 3.00E+00 | 1.77E-33 | 6.79E-32 |
| ENSG00000128591 | FLNC     | 1.55E+00 | 1.79E-33 | 6.82E-32 |
| ENSG00000132359 | RAP1GAP2 | 4.45E+00 | 1.79E-33 | 6.83E-32 |
| ENSG00000145782 | ATG12    | 1.46E+00 | 1.99E-33 | 7.54E-32 |
| ENSG00000196415 | PRTN3    | 7.65E+00 | 2.27E-33 | 8.61E-32 |
| ENSG00000244509 | APOBEC3C | 2.04E+00 | 2.33E-33 | 8.81E-32 |
| ENSG00000184828 | ZBTB7C   | 8.81E+00 | 2.35E-33 | 8.85E-32 |
| ENSG00000142319 | SLC6A3   | 8.25E+00 | 3.16E-33 | 1.19E-31 |
| ENSG00000134317 | GRHL1    | 3.90E+00 | 6.79E-33 | 2.52E-31 |
| ENSG00000065357 | DGKA     | 3.14E+00 | 6.97E-33 | 2.59E-31 |
| ENSG00000134830 | C5AR2    | 7.77E+00 | 7.03E-33 | 2.61E-31 |
| ENSG00000167962 | ZNF598   | 1.39E+00 | 1.48E-32 | 5.41E-31 |
| ENSG00000183671 | GPR1     | 5.49E+00 | 1.53E-32 | 5.60E-31 |
| ENSG00000114859 | CLCN2    | 2.79E+00 | 1.60E-32 | 5.80E-31 |
| ENSG00000185963 | BICD2    | 1.49E+00 | 1.61E-32 | 5.83E-31 |
| ENSG00000135127 | BICDL1   | 5.19E+00 | 1.80E-32 | 6.53E-31 |
| ENSG00000134308 | YWHAQ    | 1.08E+00 | 1.89E-32 | 6.85E-31 |
| ENSG00000076351 | SLC46A1  | 3.16E+00 | 2.10E-32 | 7.55E-31 |
| ENSG00000092929 | UNC13D   | 5.13E+00 | 2.09E-32 | 7.55E-31 |
| ENSG00000100234 | TIMP3    | 2.05E+00 | 2.15E-32 | 7.75E-31 |
| ENSG00000143793 | C1orf35  | 1.69E+00 | 2.22E-32 | 7.97E-31 |
| ENSG00000130707 | ASS1     | 2.04E+00 | 2.28E-32 | 8.16E-31 |
| ENSG00000104267 | CA2      | 7.18E+00 | 2.29E-32 | 8.20E-31 |
| ENSG00000158747 | NBL1     | 2.49E+00 | 2.59E-32 | 9.23E-31 |
| ENSG00000100592 | DAAM1    | 1.66E+00 | 2.81E-32 | 1.00E-30 |
| ENSG00000133985 | TTC9     | 6.05E+00 | 3.05E-32 | 1.08E-30 |
| ENSG00000164086 | DUSP7    | 1.61E+00 | 3.38E-32 | 1.20E-30 |
| ENSG00000126233 | SLURP1   | 9.44E+00 | 4.08E-32 | 1.44E-30 |
| ENSG00000185988 | PLK5     | 7.81E+00 | 4.41E-32 | 1.56E-30 |
| ENSG00000101146 | RAE1     | 1.13E+00 | 5.00E-32 | 1.76E-30 |
| ENSG00000171954 | CYP4F22  | 7.76E+00 | 5.25E-32 | 1.84E-30 |
| ENSG00000136830 | NIBAN2   | 1.99E+00 | 5.80E-32 | 2.03E-30 |
| ENSG00000130396 | AFDN     | 2.08E+00 | 6.27E-32 | 2.19E-30 |



|                 |           |          |          |          |
|-----------------|-----------|----------|----------|----------|
| ENSG00000068383 | INPP5A    | 2.04E+00 | 6.94E-32 | 2.42E-30 |
| ENSG00000174640 | SLCO2A1   | 2.64E+00 | 7.59E-32 | 2.64E-30 |
| ENSG00000129194 | SOX15     | 7.83E+00 | 1.00E-31 | 3.48E-30 |
| ENSG00000198719 | DLL1      | 5.07E+00 | 1.03E-31 | 3.56E-30 |
| ENSG00000151689 | INPP1     | 2.37E+00 | 1.06E-31 | 3.65E-30 |
| ENSG00000142798 | HSPG2     | 3.17E+00 | 1.11E-31 | 3.82E-30 |
| ENSG00000197632 | SERPINB2  | 6.43E+00 | 1.26E-31 | 4.32E-30 |
| ENSG00000183044 | ABAT      | 4.72E+00 | 1.35E-31 | 4.62E-30 |
| ENSG00000158089 | GALNT14   | 3.86E+00 | 1.42E-31 | 4.86E-30 |
| ENSG00000162772 | ATF3      | 2.56E+00 | 1.96E-31 | 6.69E-30 |
| ENSG00000085063 | CD59      | 1.41E+00 | 2.42E-31 | 8.17E-30 |
| ENSG00000129991 | TNNI3     | 5.88E+00 | 3.23E-31 | 1.09E-29 |
| ENSG00000095383 | TBC1D2    | 5.26E+00 | 3.38E-31 | 1.13E-29 |
| ENSG00000107819 | SFXN3     | 2.17E+00 | 3.94E-31 | 1.32E-29 |
| ENSG00000136854 | STXBP1    | 2.60E+00 | 4.48E-31 | 1.49E-29 |
| ENSG00000183963 | SMTN      | 2.18E+00 | 5.21E-31 | 1.73E-29 |
| ENSG00000162552 | WNT4      | 4.53E+00 | 5.83E-31 | 1.93E-29 |
| ENSG00000173153 | ESRRA     | 2.11E+00 | 6.78E-31 | 2.24E-29 |
| ENSG00000167114 | SLC27A4   | 1.50E+00 | 7.98E-31 | 2.63E-29 |
| ENSG00000180176 | TH        | 8.36E+00 | 8.12E-31 | 2.67E-29 |
| ENSG00000206075 | SERPINB5  | 8.10E+00 | 8.37E-31 | 2.75E-29 |
| ENSG00000197063 | MAFG      | 1.64E+00 | 9.21E-31 | 3.02E-29 |
| ENSG00000237330 | RNF223    | 7.93E+00 | 1.00E-30 | 3.28E-29 |
| ENSG00000178726 | THBD      | 3.67E+00 | 1.04E-30 | 3.39E-29 |
| ENSG00000088836 | SLC4A11   | 2.08E+00 | 1.05E-30 | 3.44E-29 |
| ENSG00000180914 | OXTR      | 2.77E+00 | 1.06E-30 | 3.46E-29 |
| ENSG00000224259 | LINC01133 | 7.22E+00 | 1.11E-30 | 3.60E-29 |
| ENSG00000206077 | ZDHHC11B  | 6.41E+00 | 1.18E-30 | 3.82E-29 |
| ENSG00000141503 | MINK1     | 1.68E+00 | 1.58E-30 | 5.09E-29 |
| ENSG00000124201 | ZNFX1     | 1.51E+00 | 1.60E-30 | 5.16E-29 |
| ENSG00000101096 | NFATC2    | 3.88E+00 | 1.64E-30 | 5.27E-29 |
| ENSG00000245532 | NEAT1     | 1.15E+00 | 1.79E-30 | 5.74E-29 |
| ENSG00000100242 | SUN2      | 1.16E+00 | 1.79E-30 | 5.75E-29 |
| ENSG00000084234 | APLP2     | 1.49E+00 | 1.88E-30 | 6.00E-29 |
| ENSG00000116688 | MFN2      | 1.30E+00 | 2.06E-30 | 6.59E-29 |
| ENSG00000140832 | MARVELD3  | 8.35E+00 | 2.30E-30 | 7.33E-29 |
| ENSG00000124570 | SERPINB6  | 1.47E+00 | 2.53E-30 | 8.06E-29 |
| ENSG00000102755 | FLT1      | 2.71E+00 | 2.64E-30 | 8.38E-29 |
| ENSG00000116690 | PRG4      | 8.57E+00 | 2.99E-30 | 9.47E-29 |
| ENSG00000119537 | KDSR      | 1.41E+00 | 4.08E-30 | 1.29E-28 |

|                 |          |          |          |          |
|-----------------|----------|----------|----------|----------|
| ENSG00000171552 | BCL2L1   | 1.78E+00 | 4.26E-30 | 1.34E-28 |
| ENSG00000197386 | HTT      | 1.76E+00 | 5.12E-30 | 1.61E-28 |
| ENSG00000174791 | RIN1     | 3.78E+00 | 5.52E-30 | 1.73E-28 |
| ENSG00000158055 | GRHL3    | 6.73E+00 | 6.04E-30 | 1.89E-28 |
| ENSG00000133612 | AGAP3    | 1.60E+00 | 6.24E-30 | 1.95E-28 |
| ENSG00000131584 | ACAP3    | 2.09E+00 | 6.28E-30 | 1.96E-28 |
| ENSG00000100784 | RPS6KA5  | 2.56E+00 | 7.95E-30 | 2.47E-28 |
| ENSG00000130635 | COL5A1   | 1.95E+00 | 8.11E-30 | 2.52E-28 |
| ENSG00000181026 | AEN      | 1.65E+00 | 8.33E-30 | 2.58E-28 |
| ENSG00000167646 | DNAAF3   | 4.90E+00 | 8.38E-30 | 2.59E-28 |
| ENSG00000130669 | PAK4     | 1.31E+00 | 9.60E-30 | 2.96E-28 |
| ENSG00000197077 | KIAA1671 | 2.87E+00 | 9.75E-30 | 3.00E-28 |
| ENSG00000155380 | SLC16A1  | 1.20E+00 | 1.71E-29 | 5.24E-28 |
| ENSG00000162729 | IGSF8    | 2.78E+00 | 1.76E-29 | 5.39E-28 |
| ENSG00000234127 | TRIM26   | 1.99E+00 | 1.80E-29 | 5.49E-28 |
| ENSG00000167106 | FAM102A  | 1.93E+00 | 2.22E-29 | 6.78E-28 |
| ENSG00000114796 | KLHL24   | 2.77E+00 | 2.37E-29 | 7.24E-28 |
| ENSG00000271447 | MMP28    | 8.46E+00 | 2.44E-29 | 7.43E-28 |
| ENSG00000197943 | PLCG2    | 3.90E+00 | 2.53E-29 | 7.69E-28 |
| ENSG00000187446 | CHP1     | 2.07E+00 | 3.70E-29 | 1.12E-27 |
| ENSG00000148357 | HMCN2    | 7.01E+00 | 3.72E-29 | 1.13E-27 |
| ENSG00000186591 | UBE2H    | 1.06E+00 | 4.24E-29 | 1.28E-27 |
| ENSG00000130592 | LSP1     | 5.73E+00 | 5.02E-29 | 1.51E-27 |
| ENSG00000187678 | SPRY4    | 3.12E+00 | 5.47E-29 | 1.64E-27 |
| ENSG00000181652 | ATG9B    | 7.28E+00 | 5.64E-29 | 1.68E-27 |
| ENSG00000160888 | IER2     | 1.77E+00 | 5.71E-29 | 1.70E-27 |
| ENSG00000143850 | PLEKHA6  | 5.82E+00 | 5.86E-29 | 1.74E-27 |
| ENSG00000126822 | PLEKHG3  | 1.94E+00 | 6.44E-29 | 1.91E-27 |
| ENSG00000159314 | ARHGAP27 | 2.93E+00 | 7.04E-29 | 2.08E-27 |
| ENSG00000161992 | PRR35    | 7.03E+00 | 7.78E-29 | 2.29E-27 |
| ENSG00000131873 | CHSY1    | 1.86E+00 | 9.24E-29 | 2.72E-27 |
| ENSG00000158555 | GDPD5    | 2.62E+00 | 1.15E-28 | 3.36E-27 |
| ENSG00000151748 | SAV1     | 1.54E+00 | 1.16E-28 | 3.38E-27 |
| ENSG00000021355 | SERPINB1 | 2.27E+00 | 1.36E-28 | 3.95E-27 |
| ENSG00000114019 | AMOTL2   | 1.36E+00 | 1.38E-28 | 3.98E-27 |
| ENSG00000170893 | TRH      | 1.17E+01 | 1.46E-28 | 4.20E-27 |
| ENSG00000189001 | SBSN     | 8.18E+00 | 1.46E-28 | 4.20E-27 |
| ENSG00000170017 | ALCAM    | 1.82E+00 | 1.57E-28 | 4.49E-27 |
| ENSG00000160712 | IL6R     | 4.51E+00 | 1.58E-28 | 4.52E-27 |
| ENSG00000189433 | GJB4     | 8.19E+00 | 2.06E-28 | 5.88E-27 |

|                 |          |          |          |          |
|-----------------|----------|----------|----------|----------|
| ENSG00000186895 | FGF3     | 7.25E+00 | 2.38E-28 | 6.80E-27 |
| ENSG00000080644 | CHRNA3   | 7.72E+00 | 2.57E-28 | 7.33E-27 |
| ENSG00000113742 | CPEB4    | 1.95E+00 | 2.95E-28 | 8.38E-27 |
| ENSG00000105443 | CYTH2    | 1.41E+00 | 2.98E-28 | 8.46E-27 |
| ENSG00000187800 | PEAR1    | 7.27E+00 | 3.28E-28 | 9.29E-27 |
| ENSG00000185955 | C7orf61  | 5.82E+00 | 3.92E-28 | 1.11E-26 |
| ENSG00000111725 | PRKAB1   | 1.85E+00 | 4.38E-28 | 1.24E-26 |
| ENSG00000204538 | PSORS1C2 | 7.99E+00 | 4.99E-28 | 1.41E-26 |
| ENSG00000158825 | CDA      | 4.60E+00 | 7.51E-28 | 2.11E-26 |
| ENSG00000152137 | HSPB8    | 2.36E+00 | 8.73E-28 | 2.45E-26 |
| ENSG00000139219 | COL2A1   | 4.57E+00 | 9.10E-28 | 2.54E-26 |
| ENSG00000166619 | BLCAP    | 1.30E+00 | 9.58E-28 | 2.67E-26 |
| ENSG00000130720 | FIBCD1   | 5.23E+00 | 1.03E-27 | 2.86E-26 |
| ENSG00000175416 | CLTB     | 2.84E+00 | 1.20E-27 | 3.34E-26 |
| ENSG00000155158 | TTC39B   | 3.10E+00 | 1.32E-27 | 3.66E-26 |
| ENSG00000132481 | TRIM47   | 2.39E+00 | 1.38E-27 | 3.81E-26 |
| ENSG00000160213 | CSTB     | 2.49E+00 | 1.38E-27 | 3.81E-26 |
| ENSG00000164300 | SERINC5  | 3.28E+00 | 1.40E-27 | 3.85E-26 |
| ENSG00000006611 | USH1C    | 5.39E+00 | 1.50E-27 | 4.12E-26 |
| ENSG00000275832 | ARHGAP23 | 1.80E+00 | 1.75E-27 | 4.79E-26 |
| ENSG00000091409 | ITGA6    | 2.89E+00 | 1.90E-27 | 5.20E-26 |
| ENSG00000161243 | FBXO27   | 3.06E+00 | 2.22E-27 | 6.07E-26 |
| ENSG00000122863 | CHST3    | 2.43E+00 | 2.37E-27 | 6.47E-26 |
| ENSG00000137440 | FGFBP1   | 7.97E+00 | 2.47E-27 | 6.72E-26 |
| ENSG00000137474 | MYO7A    | 8.09E+00 | 2.63E-27 | 7.14E-26 |
| ENSG00000184254 | ALDH1A3  | 1.47E+00 | 3.77E-27 | 1.02E-25 |
| ENSG00000139116 | KIF21A   | 2.21E+00 | 3.77E-27 | 1.02E-25 |
| ENSG00000010319 | SEMA3G   | 5.92E+00 | 4.13E-27 | 1.11E-25 |
| ENSG00000173762 | CD7      | 6.20E+00 | 4.15E-27 | 1.11E-25 |
| ENSG00000146054 | TRIM7    | 2.59E+00 | 4.55E-27 | 1.22E-25 |
| ENSG00000180190 | TDRP     | 2.84E+00 | 4.84E-27 | 1.29E-25 |
| ENSG00000186081 | KRT5     | 8.19E+00 | 4.91E-27 | 1.31E-25 |
| ENSG00000165684 | SNAPC4   | 1.39E+00 | 6.34E-27 | 1.68E-25 |
| ENSG00000189334 | S100A14  | 7.91E+00 | 7.44E-27 | 1.97E-25 |
| ENSG00000186474 | KLK12    | 7.98E+00 | 1.20E-26 | 3.15E-25 |
| ENSG00000204839 | MROH6    | 3.36E+00 | 1.26E-26 | 3.30E-25 |
| ENSG00000159788 | RGS12    | 1.87E+00 | 1.44E-26 | 3.79E-25 |
| ENSG00000135046 | ANXA1    | 2.09E+00 | 1.53E-26 | 4.00E-25 |
| ENSG00000186517 | ARHGAP30 | 5.47E+00 | 1.54E-26 | 4.04E-25 |
| ENSG00000184545 | DUSP8    | 2.57E+00 | 1.75E-26 | 4.58E-25 |

|                 |          |          |          |          |
|-----------------|----------|----------|----------|----------|
| ENSG00000140320 | BAHD1    | 1.84E+00 | 1.83E-26 | 4.77E-25 |
| ENSG00000104892 | KLC3     | 2.59E+00 | 1.96E-26 | 5.10E-25 |
| ENSG00000176092 | CRYBG2   | 4.30E+00 | 2.01E-26 | 5.21E-25 |
| ENSG00000162909 | CAPN2    | 1.41E+00 | 2.02E-26 | 5.24E-25 |
| ENSG00000178950 | GAK      | 1.72E+00 | 2.42E-26 | 6.27E-25 |
| ENSG00000107738 | VSIR     | 2.85E+00 | 2.44E-26 | 6.31E-25 |
| ENSG00000130558 | OLFM1    | 4.37E+00 | 2.48E-26 | 6.40E-25 |
| ENSG00000100554 | ATP6V1D  | 1.18E+00 | 3.07E-26 | 7.90E-25 |
| ENSG00000066735 | KIF26A   | 3.23E+00 | 3.65E-26 | 9.37E-25 |
| ENSG00000188015 | S100A3   | 3.13E+00 | 3.80E-26 | 9.73E-25 |
| ENSG00000140470 | ADAMTS17 | 6.89E+00 | 4.06E-26 | 1.04E-24 |
| ENSG00000197353 | LYPD2    | 7.96E+00 | 4.44E-26 | 1.13E-24 |
| ENSG00000154127 | UBASH3B  | 1.52E+00 | 5.16E-26 | 1.31E-24 |
| ENSG00000116014 | KISS1R   | 7.57E+00 | 7.11E-26 | 1.80E-24 |
| ENSG00000184160 | ADRA2C   | 5.86E+00 | 7.74E-26 | 1.95E-24 |
| ENSG00000185950 | IRS2     | 2.74E+00 | 8.69E-26 | 2.19E-24 |
| ENSG00000103888 | CEMIP    | 2.63E+00 | 8.82E-26 | 2.21E-24 |
| ENSG00000140297 | GCNT3    | 7.95E+00 | 8.82E-26 | 2.21E-24 |
| ENSG00000120899 | PTK2B    | 4.55E+00 | 8.98E-26 | 2.25E-24 |
| ENSG00000153487 | ING1     | 1.47E+00 | 9.44E-26 | 2.36E-24 |
| ENSG00000182831 | C16orf72 | 1.61E+00 | 9.89E-26 | 2.47E-24 |
| ENSG00000143537 | ADAM15   | 2.82E+00 | 1.02E-25 | 2.54E-24 |
| ENSG00000204421 | LY6G6C   | 8.01E+00 | 1.08E-25 | 2.68E-24 |
| ENSG00000103066 | PLA2G15  | 1.92E+00 | 1.27E-25 | 3.16E-24 |
| ENSG00000173404 | INSM1    | 7.98E+00 | 1.34E-25 | 3.32E-24 |
| ENSG00000225190 | PLEKHM1  | 2.10E+00 | 1.34E-25 | 3.32E-24 |
| ENSG00000163191 | S100A11  | 2.10E+00 | 1.40E-25 | 3.48E-24 |
| ENSG00000066322 | ELOVL1   | 2.64E+00 | 1.57E-25 | 3.87E-24 |
| ENSG00000171747 | LGALS4   | 7.72E+00 | 1.70E-25 | 4.19E-24 |
| ENSG00000182325 | FBXL6    | 2.57E+00 | 1.87E-25 | 4.60E-24 |
| ENSG00000164266 | SPINK1   | 8.43E+00 | 2.15E-25 | 5.27E-24 |
| ENSG00000172613 | RAD9A    | 2.00E+00 | 2.25E-25 | 5.52E-24 |
| ENSG00000124493 | GRM4     | 7.13E+00 | 2.31E-25 | 5.64E-24 |
| ENSG00000087494 | PTHLH    | 4.99E+00 | 2.36E-25 | 5.77E-24 |
| ENSG00000176058 | TPRN     | 1.88E+00 | 2.38E-25 | 5.81E-24 |
| ENSG00000163293 | NIPAL1   | 2.52E+00 | 2.69E-25 | 6.55E-24 |
| ENSG00000151929 | BAG3     | 1.91E+00 | 2.96E-25 | 7.20E-24 |
| ENSG00000102572 | STK24    | 1.17E+00 | 3.07E-25 | 7.45E-24 |
| ENSG00000180900 | SCRIB    | 1.91E+00 | 4.83E-25 | 1.17E-23 |
| ENSG00000078804 | TP53INP2 | 1.82E+00 | 5.57E-25 | 1.34E-23 |

|                 |           |          |          |          |
|-----------------|-----------|----------|----------|----------|
| ENSG0000007372  | PAX6      | 2.42E+00 | 6.37E-25 | 1.53E-23 |
| ENSG00000176046 | NUPR1     | 2.49E+00 | 6.57E-25 | 1.58E-23 |
| ENSG00000181218 | HIST3H2A  | 2.77E+00 | 7.58E-25 | 1.82E-23 |
| ENSG00000160789 | LMNA      | 1.31E+00 | 8.07E-25 | 1.93E-23 |
| ENSG00000134108 | ARL8B     | 1.17E+00 | 8.10E-25 | 1.94E-23 |
| ENSG00000266412 | NCOA4     | 1.05E+00 | 8.27E-25 | 1.97E-23 |
| ENSG00000101188 | NTSR1     | 7.86E+00 | 8.52E-25 | 2.03E-23 |
| ENSG00000179833 | SERTAD2   | 1.73E+00 | 9.59E-25 | 2.27E-23 |
| ENSG00000163083 | INHBB     | 4.03E+00 | 1.03E-24 | 2.44E-23 |
| ENSG00000091592 | NLRP1     | 3.57E+00 | 1.07E-24 | 2.53E-23 |
| ENSG00000167281 | RBFOX3    | 7.92E+00 | 1.14E-24 | 2.69E-23 |
| ENSG00000151693 | ASAP2     | 1.81E+00 | 1.29E-24 | 3.03E-23 |
| ENSG00000074370 | ATP2A3    | 2.79E+00 | 1.33E-24 | 3.13E-23 |
| ENSG00000182220 | ATP6AP2   | 1.14E+00 | 1.46E-24 | 3.41E-23 |
| ENSG00000234465 | PINLYP    | 6.44E+00 | 1.50E-24 | 3.49E-23 |
| ENSG00000188883 | KLRG2     | 6.20E+00 | 1.65E-24 | 3.83E-23 |
| ENSG00000069482 | GAL       | 2.29E+00 | 1.69E-24 | 3.94E-23 |
| ENSG00000196576 | PLXNB2    | 1.43E+00 | 1.98E-24 | 4.59E-23 |
| ENSG00000161638 | ITGA5     | 1.78E+00 | 2.09E-24 | 4.84E-23 |
| ENSG00000164171 | ITGA2     | 2.80E+00 | 2.10E-24 | 4.86E-23 |
| ENSG00000109079 | TNFAIP1   | 1.59E+00 | 2.41E-24 | 5.57E-23 |
| ENSG00000179604 | CDC42EP4  | 1.39E+00 | 2.51E-24 | 5.80E-23 |
| ENSG00000072163 | LIMS2     | 3.17E+00 | 2.55E-24 | 5.87E-23 |
| ENSG00000158373 | HIST1H2BD | 2.33E+00 | 2.71E-24 | 6.23E-23 |
| ENSG00000175592 | FOSL1     | 2.13E+00 | 2.86E-24 | 6.56E-23 |
| ENSG00000164045 | CDC25A    | 1.25E+00 | 2.99E-24 | 6.85E-23 |
| ENSG00000136842 | TMOD1     | 4.31E+00 | 3.32E-24 | 7.59E-23 |
| ENSG00000076685 | NT5C2     | 1.60E+00 | 3.38E-24 | 7.71E-23 |
| ENSG00000196975 | ANXA4     | 1.69E+00 | 3.38E-24 | 7.71E-23 |
| ENSG00000080546 | SESN1     | 2.46E+00 | 3.48E-24 | 7.91E-23 |
| ENSG00000114473 | IQCG      | 2.38E+00 | 4.07E-24 | 9.20E-23 |
| ENSG00000127870 | RNF6      | 1.42E+00 | 4.48E-24 | 1.01E-22 |
| ENSG00000237512 | UNC5B-AS1 | 6.32E+00 | 5.21E-24 | 1.17E-22 |
| ENSG00000108669 | CYTH1     | 1.38E+00 | 6.54E-24 | 1.46E-22 |
| ENSG00000188522 | FAM83G    | 2.23E+00 | 7.05E-24 | 1.57E-22 |
| ENSG00000189143 | CLDN4     | 5.27E+00 | 8.81E-24 | 1.95E-22 |
| ENSG00000189337 | KAZN      | 3.26E+00 | 1.01E-23 | 2.23E-22 |
| ENSG00000106608 | URGCP     | 1.89E+00 | 1.06E-23 | 2.34E-22 |
| ENSG00000132561 | MATN2     | 2.11E+00 | 1.06E-23 | 2.34E-22 |
| ENSG00000105281 | SLC1A5    | 1.34E+00 | 1.08E-23 | 2.38E-22 |

|                 |           |          |          |          |
|-----------------|-----------|----------|----------|----------|
| ENSG00000159871 | LYPD5     | 4.08E+00 | 1.15E-23 | 2.52E-22 |
| ENSG00000105993 | DNAJB6    | 1.08E+00 | 1.17E-23 | 2.57E-22 |
| ENSG00000080503 | SMARCA2   | 1.97E+00 | 1.20E-23 | 2.63E-22 |
| ENSG00000131746 | TNS4      | 7.62E+00 | 1.27E-23 | 2.77E-22 |
| ENSG00000171403 | KRT9      | 7.52E+00 | 1.29E-23 | 2.83E-22 |
| ENSG00000120889 | TNFRSF10B | 1.12E+00 | 1.34E-23 | 2.93E-22 |
| ENSG00000010310 | GIPR      | 4.79E+00 | 1.36E-23 | 2.96E-22 |
| ENSG00000168961 | LGALS9    | 4.74E+00 | 1.39E-23 | 3.03E-22 |
| ENSG00000182326 | C1S       | 1.97E+00 | 1.74E-23 | 3.78E-22 |
| ENSG00000160753 | RUSC1     | 1.62E+00 | 1.81E-23 | 3.94E-22 |
| ENSG00000176153 | GPX2      | 7.62E+00 | 1.82E-23 | 3.94E-22 |
| ENSG00000178882 | RFLNA     | 4.93E+00 | 1.85E-23 | 4.00E-22 |
| ENSG00000151640 | DPYSL4    | 2.33E+00 | 1.90E-23 | 4.11E-22 |
| ENSG00000014216 | CAPN1     | 1.72E+00 | 2.19E-23 | 4.73E-22 |
| ENSG00000058404 | CAMK2B    | 4.77E+00 | 2.38E-23 | 5.14E-22 |
| ENSG00000131759 | RARA      | 1.44E+00 | 2.47E-23 | 5.30E-22 |
| ENSG00000188070 | C11orf95  | 2.44E+00 | 2.83E-23 | 6.09E-22 |
| ENSG00000179292 | TMEM151A  | 3.45E+00 | 2.90E-23 | 6.22E-22 |
| ENSG00000125633 | CCDC93    | 1.41E+00 | 2.93E-23 | 6.27E-22 |
| ENSG00000118046 | STK11     | 1.60E+00 | 3.09E-23 | 6.60E-22 |
| ENSG00000166558 | SLC38A8   | 7.16E+00 | 3.18E-23 | 6.79E-22 |
| ENSG00000151348 | EXT2      | 1.20E+00 | 3.89E-23 | 8.27E-22 |
| ENSG00000163956 | LRPAP1    | 1.19E+00 | 4.30E-23 | 9.13E-22 |
| ENSG00000165949 | IFI27     | 4.69E+00 | 4.73E-23 | 1.00E-21 |
| ENSG00000117676 | RPS6KA1   | 2.10E+00 | 4.77E-23 | 1.01E-21 |
| ENSG00000100596 | SPTLC2    | 1.53E+00 | 4.91E-23 | 1.04E-21 |
| ENSG00000139624 | CERS5     | 1.89E+00 | 4.96E-23 | 1.05E-21 |
| ENSG00000167653 | PSCA      | 5.54E+00 | 5.85E-23 | 1.23E-21 |
| ENSG00000141644 | MBD1      | 1.29E+00 | 6.06E-23 | 1.28E-21 |
| ENSG00000105370 | LIM2      | 7.31E+00 | 7.02E-23 | 1.48E-21 |
| ENSG00000146112 | PPP1R18   | 1.50E+00 | 7.14E-23 | 1.50E-21 |
| ENSG00000154217 | PITPNC1   | 3.02E+00 | 7.36E-23 | 1.55E-21 |
| ENSG00000131042 | LILRB2    | 7.52E+00 | 7.58E-23 | 1.59E-21 |
| ENSG00000184371 | CSF1      | 1.78E+00 | 7.76E-23 | 1.63E-21 |
| ENSG00000064961 | HMG20B    | 1.41E+00 | 7.97E-23 | 1.67E-21 |
| ENSG00000138814 | PPP3CA    | 1.07E+00 | 9.34E-23 | 1.94E-21 |
| ENSG00000268621 | IGFL2-AS1 | 3.63E+00 | 9.92E-23 | 2.06E-21 |
| ENSG00000109670 | FBXW7     | 1.28E+00 | 1.04E-22 | 2.15E-21 |
| ENSG00000210082 | MT-RNR2   | 1.12E+00 | 1.13E-22 | 2.33E-21 |
| ENSG00000117472 | TSPAN1    | 6.58E+00 | 1.18E-22 | 2.44E-21 |

|                 |            |          |          |          |
|-----------------|------------|----------|----------|----------|
| ENSG00000161249 | DMKN       | 4.07E+00 | 1.23E-22 | 2.54E-21 |
| ENSG00000170734 | POLH       | 1.98E+00 | 1.28E-22 | 2.62E-21 |
| ENSG00000177508 | IRX3       | 2.09E+00 | 1.29E-22 | 2.64E-21 |
| ENSG00000162344 | FGF19      | 7.29E+00 | 1.37E-22 | 2.81E-21 |
| ENSG00000159674 | SPON2      | 7.28E+00 | 1.44E-22 | 2.94E-21 |
| ENSG00000096433 | ITPR3      | 1.91E+00 | 1.61E-22 | 3.26E-21 |
| ENSG00000134871 | COL4A2     | 1.09E+00 | 1.93E-22 | 3.90E-21 |
| ENSG00000119541 | VPS4B      | 1.54E+00 | 2.02E-22 | 4.10E-21 |
| ENSG00000110047 | EHD1       | 1.77E+00 | 2.09E-22 | 4.23E-21 |
| ENSG00000182372 | CLN8       | 1.74E+00 | 2.11E-22 | 4.26E-21 |
| ENSG00000258791 | LINC00520  | 7.77E+00 | 2.13E-22 | 4.30E-21 |
| ENSG00000177469 | CAVIN1     | 1.06E+00 | 2.46E-22 | 4.94E-21 |
| ENSG00000167302 | TEPSIN     | 1.96E+00 | 2.68E-22 | 5.38E-21 |
| ENSG00000189280 | GJB5       | 7.29E+00 | 2.81E-22 | 5.63E-21 |
| ENSG00000065613 | SLK        | 1.46E+00 | 2.97E-22 | 5.94E-21 |
| ENSG00000161714 | PLCD3      | 1.69E+00 | 3.28E-22 | 6.57E-21 |
| ENSG00000166016 | ABTB2      | 2.57E+00 | 3.46E-22 | 6.92E-21 |
| ENSG00000213047 | DENND1B    | 2.46E+00 | 3.51E-22 | 7.01E-21 |
| ENSG00000168300 | PCMTD1     | 1.97E+00 | 3.84E-22 | 7.65E-21 |
| ENSG00000128298 | BAIAP2L2   | 6.46E+00 | 4.68E-22 | 9.29E-21 |
| ENSG00000050165 | DKK3       | 1.63E+00 | 4.76E-22 | 9.45E-21 |
| ENSG00000101204 | CHRNA4     | 7.24E+00 | 7.73E-22 | 1.53E-20 |
| ENSG00000108819 | PPP1R9B    | 1.38E+00 | 8.28E-22 | 1.63E-20 |
| ENSG00000119782 | FKBP1B     | 3.61E+00 | 8.29E-22 | 1.63E-20 |
| ENSG00000158859 | ADAMTS4    | 6.05E+00 | 1.13E-21 | 2.21E-20 |
| ENSG00000167306 | MYO5B      | 5.12E+00 | 1.14E-21 | 2.22E-20 |
| ENSG00000011600 | TYROBP     | 7.64E+00 | 1.18E-21 | 2.30E-20 |
| ENSG00000107262 | BAG1       | 1.24E+00 | 1.24E-21 | 2.42E-20 |
| ENSG00000090339 | ICAM1      | 1.91E+00 | 1.27E-21 | 2.46E-20 |
| ENSG00000138166 | DUSP5      | 1.96E+00 | 1.30E-21 | 2.52E-20 |
| ENSG00000172216 | CEBPB      | 1.22E+00 | 1.41E-21 | 2.73E-20 |
| ENSG00000205413 | SAMD9      | 1.95E+00 | 1.45E-21 | 2.81E-20 |
| ENSG00000130340 | SNX9       | 1.36E+00 | 1.49E-21 | 2.87E-20 |
| ENSG00000031698 | SARS       | 1.02E+00 | 1.66E-21 | 3.21E-20 |
| ENSG00000148672 | GLUD1      | 1.15E+00 | 1.82E-21 | 3.49E-20 |
| ENSG00000179862 | CITED4     | 3.54E+00 | 1.93E-21 | 3.70E-20 |
| ENSG00000065054 | SLC9A3R2   | 1.83E+00 | 1.97E-21 | 3.77E-20 |
| ENSG00000178297 | TMPRSS9    | 7.22E+00 | 2.00E-21 | 3.82E-20 |
| ENSG00000214135 | AC132008.2 | 2.56E+00 | 2.02E-21 | 3.85E-20 |
| ENSG00000162783 | IER5       | 1.67E+00 | 2.31E-21 | 4.41E-20 |

|                 |          |          |          |          |
|-----------------|----------|----------|----------|----------|
| ENSG00000100997 | ABHD12   | 1.69E+00 | 2.57E-21 | 4.91E-20 |
| ENSG00000104885 | DOT1L    | 1.96E+00 | 2.71E-21 | 5.15E-20 |
| ENSG00000157637 | SLC38A10 | 1.38E+00 | 2.71E-21 | 5.15E-20 |
| ENSG00000137575 | SDCBP    | 1.05E+00 | 2.72E-21 | 5.18E-20 |
| ENSG00000130294 | KIF1A    | 5.80E+00 | 3.13E-21 | 5.94E-20 |
| ENSG00000077009 | NMRK2    | 7.56E+00 | 3.23E-21 | 6.11E-20 |
| ENSG00000099331 | MYO9B    | 1.56E+00 | 3.30E-21 | 6.23E-20 |
| ENSG00000153303 | FRMD1    | 7.23E+00 | 3.38E-21 | 6.38E-20 |
| ENSG00000126705 | AHDC1    | 1.78E+00 | 3.55E-21 | 6.68E-20 |
| ENSG00000175121 | WFDC5    | 7.46E+00 | 3.63E-21 | 6.84E-20 |
| ENSG00000101134 | DOK5     | 7.19E+00 | 3.85E-21 | 7.22E-20 |
| ENSG00000054598 | FOXC1    | 1.99E+00 | 3.88E-21 | 7.27E-20 |
| ENSG00000137975 | CLCA2    | 5.19E+00 | 4.09E-21 | 7.66E-20 |
| ENSG00000128016 | ZFP36    | 2.93E+00 | 4.42E-21 | 8.28E-20 |
| ENSG00000111981 | ULBP1    | 2.51E+00 | 4.60E-21 | 8.61E-20 |
| ENSG00000177494 | ZBED2    | 7.33E+00 | 4.66E-21 | 8.70E-20 |
| ENSG00000100523 | DDHD1    | 2.01E+00 | 4.72E-21 | 8.80E-20 |
| ENSG00000099804 | CDC34    | 1.92E+00 | 4.82E-21 | 8.99E-20 |
| ENSG00000184792 | OSBP2    | 2.63E+00 | 5.32E-21 | 9.91E-20 |
| ENSG00000129538 | RNASE1   | 7.09E+00 | 5.38E-21 | 1.00E-19 |
| ENSG00000164082 | GRM2     | 5.42E+00 | 5.42E-21 | 1.01E-19 |
| ENSG00000143590 | EFNA3    | 2.23E+00 | 5.71E-21 | 1.06E-19 |
| ENSG00000057657 | PRDM1    | 4.07E+00 | 6.34E-21 | 1.18E-19 |
| ENSG00000164853 | UNCX     | 7.52E+00 | 7.14E-21 | 1.32E-19 |
| ENSG00000161642 | ZNF385A  | 2.06E+00 | 7.57E-21 | 1.40E-19 |
| ENSG00000110628 | SLC22A18 | 2.76E+00 | 7.89E-21 | 1.45E-19 |
| ENSG00000170836 | PPM1D    | 2.02E+00 | 8.74E-21 | 1.61E-19 |
| ENSG00000128294 | TPST2    | 1.96E+00 | 9.29E-21 | 1.70E-19 |
| ENSG00000108309 | RUNDC3A  | 5.80E+00 | 9.51E-21 | 1.74E-19 |
| ENSG00000139410 | SDSL     | 2.18E+00 | 9.65E-21 | 1.77E-19 |
| ENSG00000005700 | IBTK     | 1.35E+00 | 1.14E-20 | 2.07E-19 |
| ENSG00000002726 | AOC1     | 7.33E+00 | 1.14E-20 | 2.08E-19 |
| ENSG00000162572 | SCNN1D   | 3.66E+00 | 1.42E-20 | 2.57E-19 |
| ENSG00000161835 | GRASP    | 3.68E+00 | 1.44E-20 | 2.61E-19 |
| ENSG00000122359 | ANXA11   | 1.50E+00 | 1.45E-20 | 2.62E-19 |
| ENSG00000124222 | STX16    | 1.59E+00 | 1.58E-20 | 2.85E-19 |
| ENSG00000213722 | DDAH2    | 1.75E+00 | 1.69E-20 | 3.04E-19 |
| ENSG00000085433 | WDR47    | 2.08E+00 | 1.92E-20 | 3.45E-19 |
| ENSG00000100346 | CACNA1I  | 6.51E+00 | 2.03E-20 | 3.64E-19 |
| ENSG00000100427 | MLC1     | 6.97E+00 | 2.04E-20 | 3.64E-19 |



|                 |           |          |          |          |
|-----------------|-----------|----------|----------|----------|
| ENSG00000111897 | SERINC1   | 1.28E+00 | 2.09E-20 | 3.73E-19 |
| ENSG00000121039 | RDH10     | 2.35E+00 | 2.15E-20 | 3.83E-19 |
| ENSG00000112715 | VEGFA     | 1.82E+00 | 2.17E-20 | 3.87E-19 |
| ENSG00000214688 | C10orf105 | 7.27E+00 | 2.17E-20 | 3.87E-19 |
| ENSG00000197747 | S100A10   | 1.26E+00 | 2.64E-20 | 4.69E-19 |
| ENSG00000072786 | STK10     | 1.77E+00 | 2.68E-20 | 4.76E-19 |
| ENSG00000101152 | DNAJC5    | 1.04E+00 | 2.71E-20 | 4.79E-19 |
| ENSG00000153395 | LPCAT1    | 2.24E+00 | 3.00E-20 | 5.30E-19 |
| ENSG00000242802 | AP5Z1     | 1.63E+00 | 3.21E-20 | 5.65E-19 |
| ENSG00000180155 | LYNX1     | 3.13E+00 | 3.47E-20 | 6.10E-19 |
| ENSG00000262152 | LINC00514 | 6.77E+00 | 3.59E-20 | 6.29E-19 |
| ENSG00000099617 | EFNA2     | 3.59E+00 | 4.02E-20 | 7.05E-19 |
| ENSG00000116198 | CEP104    | 1.26E+00 | 4.08E-20 | 7.13E-19 |
| ENSG00000107679 | PLEKHA1   | 1.56E+00 | 4.29E-20 | 7.49E-19 |
| ENSG00000105388 | CEACAM5   | 7.28E+00 | 4.29E-20 | 7.49E-19 |
| ENSG00000181222 | POLR2A    | 1.51E+00 | 4.73E-20 | 8.23E-19 |
| ENSG00000182580 | EPHB3     | 2.43E+00 | 5.03E-20 | 8.74E-19 |
| ENSG00000078808 | SDF4      | 1.06E+00 | 5.11E-20 | 8.87E-19 |
| ENSG00000149115 | TNKS1BP1  | 1.48E+00 | 5.64E-20 | 9.78E-19 |
| ENSG00000026103 | FAS       | 3.29E+00 | 5.79E-20 | 1.00E-18 |
| ENSG00000011422 | PLAUR     | 2.39E+00 | 5.92E-20 | 1.03E-18 |
| ENSG00000105376 | ICAM5     | 3.53E+00 | 6.15E-20 | 1.06E-18 |
| ENSG00000136153 | LMO7      | 1.47E+00 | 6.28E-20 | 1.08E-18 |
| ENSG00000005238 | FAM214B   | 3.45E+00 | 6.35E-20 | 1.10E-18 |
| ENSG00000100744 | GSKIP     | 2.08E+00 | 6.80E-20 | 1.17E-18 |
| ENSG00000154118 | JPH3      | 4.59E+00 | 6.83E-20 | 1.17E-18 |
| ENSG00000116032 | GRIN3B    | 6.50E+00 | 6.88E-20 | 1.18E-18 |
| ENSG00000169994 | MYO7B     | 7.00E+00 | 6.89E-20 | 1.18E-18 |
| ENSG00000130595 | TNNT3     | 7.06E+00 | 7.22E-20 | 1.23E-18 |
| ENSG00000078237 | TIGAR     | 2.52E+00 | 7.36E-20 | 1.26E-18 |
| ENSG00000107736 | CDH23     | 3.59E+00 | 7.56E-20 | 1.29E-18 |
| ENSG00000093000 | NUP50     | 1.34E+00 | 7.72E-20 | 1.31E-18 |
| ENSG00000111344 | RASAL1    | 6.27E+00 | 7.82E-20 | 1.33E-18 |
| ENSG00000130703 | OSBPL2    | 1.33E+00 | 8.77E-20 | 1.49E-18 |
| ENSG00000186810 | CXCR3     | 6.71E+00 | 9.26E-20 | 1.57E-18 |
| ENSG00000005513 | SOX8      | 7.11E+00 | 9.30E-20 | 1.57E-18 |
| ENSG00000177374 | HIC1      | 2.40E+00 | 9.34E-20 | 1.58E-18 |
| ENSG00000163283 | ALPP      | 4.71E+00 | 9.64E-20 | 1.63E-18 |
| ENSG00000163501 | IHH       | 5.76E+00 | 9.94E-20 | 1.67E-18 |
| ENSG00000168938 | PPIC      | 1.55E+00 | 1.01E-19 | 1.71E-18 |

|                 |           |          |          |          |
|-----------------|-----------|----------|----------|----------|
| ENSG00000133101 | CCNA1     | 3.06E+00 | 1.05E-19 | 1.77E-18 |
| ENSG00000104055 | TGM5      | 6.58E+00 | 1.07E-19 | 1.79E-18 |
| ENSG00000100412 | ACO2      | 1.05E+00 | 1.21E-19 | 2.02E-18 |
| ENSG00000104976 | SNAPC2    | 1.55E+00 | 1.40E-19 | 2.33E-18 |
| ENSG00000135047 | CTSL      | 1.14E+00 | 1.52E-19 | 2.54E-18 |
| ENSG00000160570 | DEDD2     | 1.49E+00 | 1.58E-19 | 2.62E-18 |
| ENSG00000175155 | YPEL2     | 3.63E+00 | 1.65E-19 | 2.74E-18 |
| ENSG00000071205 | ARHGAP10  | 1.78E+00 | 1.65E-19 | 2.74E-18 |
| ENSG00000179242 | CDH4      | 5.53E+00 | 1.77E-19 | 2.94E-18 |
| ENSG00000088833 | NSFL1C    | 1.17E+00 | 1.81E-19 | 2.99E-18 |
| ENSG00000105664 | COMP      | 4.10E+00 | 1.81E-19 | 3.00E-18 |
| ENSG00000198736 | MSRB1     | 1.73E+00 | 1.82E-19 | 3.00E-18 |
| ENSG00000164221 | CCDC112   | 1.80E+00 | 1.82E-19 | 3.01E-18 |
| ENSG00000167702 | KIFC2     | 2.30E+00 | 1.86E-19 | 3.07E-18 |
| ENSG00000172890 | NADSYN1   | 2.19E+00 | 2.25E-19 | 3.70E-18 |
| ENSG00000109046 | WSB1      | 1.09E+00 | 2.32E-19 | 3.81E-18 |
| ENSG00000184113 | CLDN5     | 6.86E+00 | 2.36E-19 | 3.86E-18 |
| ENSG00000104756 | KCTD9     | 1.18E+00 | 2.48E-19 | 4.06E-18 |
| ENSG00000187017 | ESPN      | 6.85E+00 | 2.85E-19 | 4.65E-18 |
| ENSG00000012223 | LTF       | 6.25E+00 | 2.86E-19 | 4.66E-18 |
| ENSG00000261150 | EPPK1     | 2.46E+00 | 3.01E-19 | 4.90E-18 |
| ENSG00000116761 | CTH       | 4.07E+00 | 3.21E-19 | 5.23E-18 |
| ENSG00000167110 | GOLGA2    | 1.40E+00 | 3.32E-19 | 5.40E-18 |
| ENSG00000238266 | LINC00707 | 6.63E+00 | 3.42E-19 | 5.54E-18 |
| ENSG00000215182 | MUC5AC    | 6.81E+00 | 3.67E-19 | 5.94E-18 |
| ENSG00000101439 | CST3      | 1.74E+00 | 3.70E-19 | 5.98E-18 |
| ENSG00000268041 | ERFL      | 3.86E+00 | 3.80E-19 | 6.14E-18 |
| ENSG00000109099 | PMP22     | 1.26E+00 | 3.85E-19 | 6.22E-18 |
| ENSG00000167173 | C15orf39  | 1.52E+00 | 4.03E-19 | 6.50E-18 |
| ENSG00000105856 | HBP1      | 1.82E+00 | 4.24E-19 | 6.83E-18 |
| ENSG00000114353 | GNAI2     | 1.14E+00 | 4.53E-19 | 7.31E-18 |
| ENSG00000127663 | KDM4B     | 1.72E+00 | 5.00E-19 | 8.05E-18 |
| ENSG00000087116 | ADAMTS2   | 5.01E+00 | 5.18E-19 | 8.32E-18 |
| ENSG00000161671 | EMC10     | 1.07E+00 | 5.69E-19 | 9.12E-18 |
| ENSG00000215915 | ATAD3C    | 5.54E+00 | 6.21E-19 | 9.96E-18 |
| ENSG00000169155 | ZBTB43    | 1.90E+00 | 6.45E-19 | 1.03E-17 |
| ENSG00000179134 | SAMD4B    | 1.21E+00 | 6.59E-19 | 1.05E-17 |
| ENSG00000153162 | BMP6      | 6.13E+00 | 6.74E-19 | 1.08E-17 |
| ENSG00000130529 | TRPM4     | 2.26E+00 | 6.94E-19 | 1.11E-17 |
| ENSG00000198142 | SOWAHC    | 1.77E+00 | 6.94E-19 | 1.11E-17 |

|                 |          |          |          |          |
|-----------------|----------|----------|----------|----------|
| ENSG00000120885 | CLU      | 1.30E+00 | 7.35E-19 | 1.17E-17 |
| ENSG00000105699 | LSR      | 1.69E+00 | 7.63E-19 | 1.21E-17 |
| ENSG00000105127 | AKAP8    | 1.29E+00 | 8.36E-19 | 1.33E-17 |
| ENSG00000145901 | TNIP1    | 1.14E+00 | 8.38E-19 | 1.33E-17 |
| ENSG00000198853 | RUSC2    | 1.94E+00 | 9.73E-19 | 1.54E-17 |
| ENSG00000167754 | KLK5     | 7.16E+00 | 1.02E-18 | 1.61E-17 |
| ENSG00000137843 | PAK6     | 4.19E+00 | 1.10E-18 | 1.73E-17 |
| ENSG00000177694 | NAALADL2 | 7.40E+00 | 1.11E-18 | 1.74E-17 |
| ENSG00000117139 | KDM5B    | 1.89E+00 | 1.16E-18 | 1.81E-17 |
| ENSG00000110076 | NRXN2    | 3.53E+00 | 1.32E-18 | 2.06E-17 |
| ENSG00000181045 | SLC26A11 | 2.32E+00 | 1.41E-18 | 2.21E-17 |
| ENSG00000183077 | AFMID    | 1.68E+00 | 1.56E-18 | 2.43E-17 |
| ENSG00000100867 | DHRS2    | 2.71E+00 | 1.58E-18 | 2.45E-17 |
| ENSG00000130052 | STARD8   | 3.48E+00 | 1.59E-18 | 2.47E-17 |
| ENSG00000080854 | IGSF9B   | 3.89E+00 | 1.63E-18 | 2.52E-17 |
| ENSG00000108175 | ZMIZ1    | 1.44E+00 | 1.74E-18 | 2.70E-17 |
| ENSG00000135114 | OASL     | 4.64E+00 | 1.85E-18 | 2.87E-17 |
| ENSG00000102802 | MEDAG    | 3.98E+00 | 1.91E-18 | 2.96E-17 |
| ENSG00000155744 | FAM126B  | 2.03E+00 | 1.97E-18 | 3.03E-17 |
| ENSG00000022567 | SLC45A4  | 2.43E+00 | 2.16E-18 | 3.32E-17 |
| ENSG00000198805 | PNP      | 1.44E+00 | 2.19E-18 | 3.36E-17 |
| ENSG00000182173 | TSEN54   | 1.31E+00 | 2.20E-18 | 3.37E-17 |
| ENSG00000198959 | TGM2     | 2.79E+00 | 2.20E-18 | 3.37E-17 |
| ENSG00000055609 | KMT2C    | 1.85E+00 | 2.39E-18 | 3.66E-17 |
| ENSG00000048392 | RRM2B    | 1.74E+00 | 2.44E-18 | 3.73E-17 |
| ENSG00000167941 | SOST     | 6.84E+00 | 2.49E-18 | 3.81E-17 |
| ENSG00000075891 | PAX2     | 6.74E+00 | 2.55E-18 | 3.88E-17 |
| ENSG00000204542 | C6orf15  | 6.87E+00 | 2.56E-18 | 3.89E-17 |
| ENSG00000166908 | PIP4K2C  | 1.66E+00 | 2.74E-18 | 4.17E-17 |
| ENSG00000145107 | TM4SF19  | 5.56E+00 | 2.97E-18 | 4.50E-17 |
| ENSG00000132334 | PTPRE    | 1.58E+00 | 3.41E-18 | 5.14E-17 |
| ENSG00000153531 | ADPRHL1  | 4.18E+00 | 3.83E-18 | 5.75E-17 |
| ENSG00000161533 | ACOX1    | 1.37E+00 | 3.97E-18 | 5.96E-17 |
| ENSG00000118689 | FOXO3    | 1.47E+00 | 4.16E-18 | 6.24E-17 |
| ENSG00000127585 | FBXL16   | 4.37E+00 | 4.46E-18 | 6.66E-17 |
| ENSG00000085185 | BCORL1   | 2.18E+00 | 4.86E-18 | 7.25E-17 |
| ENSG00000116663 | FBXO6    | 3.31E+00 | 4.93E-18 | 7.35E-17 |
| ENSG00000033867 | SLC4A7   | 1.11E+00 | 5.33E-18 | 7.94E-17 |
| ENSG00000168792 | ABHD15   | 2.08E+00 | 5.41E-18 | 8.05E-17 |
| ENSG00000050820 | BCAR1    | 1.11E+00 | 5.42E-18 | 8.06E-17 |

|                 |            |          |          |          |
|-----------------|------------|----------|----------|----------|
| ENSG00000104228 | TRIM35     | 2.00E+00 | 6.32E-18 | 9.36E-17 |
| ENSG00000196998 | WDR45      | 1.52E+00 | 6.76E-18 | 9.97E-17 |
| ENSG00000196557 | CACNA1H    | 3.85E+00 | 7.00E-18 | 1.03E-16 |
| ENSG00000103034 | NDRG4      | 4.11E+00 | 7.12E-18 | 1.05E-16 |
| ENSG00000107745 | MICU1      | 1.23E+00 | 7.34E-18 | 1.08E-16 |
| ENSG00000099917 | MED15      | 1.26E+00 | 7.64E-18 | 1.12E-16 |
| ENSG00000178597 | PSAPL1     | 6.79E+00 | 7.75E-18 | 1.14E-16 |
| ENSG00000052344 | PRSS8      | 5.24E+00 | 7.86E-18 | 1.15E-16 |
| ENSG00000165105 | RASEF      | 2.87E+00 | 7.99E-18 | 1.17E-16 |
| ENSG00000163499 | CRYBA2     | 4.93E+00 | 8.12E-18 | 1.19E-16 |
| ENSG00000135002 | RFK        | 1.51E+00 | 8.20E-18 | 1.20E-16 |
| ENSG00000196586 | MYO6       | 1.62E+00 | 8.38E-18 | 1.22E-16 |
| ENSG00000158828 | PINK1      | 1.78E+00 | 8.46E-18 | 1.23E-16 |
| ENSG00000005884 | ITGA3      | 1.13E+00 | 8.50E-18 | 1.24E-16 |
| ENSG00000198892 | SHISA4     | 2.23E+00 | 8.63E-18 | 1.25E-16 |
| ENSG00000159625 | DRC7       | 6.34E+00 | 8.67E-18 | 1.26E-16 |
| ENSG00000116574 | RHOU       | 4.87E+00 | 8.91E-18 | 1.29E-16 |
| ENSG00000131196 | NFATC1     | 2.25E+00 | 9.22E-18 | 1.34E-16 |
| ENSG00000047249 | ATP6V1H    | 1.22E+00 | 9.25E-18 | 1.34E-16 |
| ENSG00000169181 | GSG1L      | 6.79E+00 | 9.28E-18 | 1.34E-16 |
| ENSG00000166473 | PKD1L2     | 6.43E+00 | 9.50E-18 | 1.37E-16 |
| ENSG00000122507 | BBS9       | 2.67E+00 | 1.00E-17 | 1.45E-16 |
| ENSG00000206140 | TMEM191C   | 6.24E+00 | 1.02E-17 | 1.47E-16 |
| ENSG00000186594 | MIR22HG    | 1.55E+00 | 1.09E-17 | 1.57E-16 |
| ENSG00000170421 | KRT8       | 2.07E+00 | 1.13E-17 | 1.62E-16 |
| ENSG00000171793 | CTPS1      | 1.18E+00 | 1.14E-17 | 1.64E-16 |
| ENSG00000069011 | PITX1      | 1.18E+00 | 1.43E-17 | 2.05E-16 |
| ENSG00000007306 | CEACAM7    | 6.68E+00 | 1.48E-17 | 2.12E-16 |
| ENSG00000164379 | FOXQ1      | 7.00E+00 | 1.49E-17 | 2.13E-16 |
| ENSG00000262714 | AC007342.5 | 6.83E+00 | 1.52E-17 | 2.18E-16 |
| ENSG00000173621 | LRFN4      | 1.33E+00 | 1.59E-17 | 2.26E-16 |
| ENSG00000176953 | NFATC2IP   | 1.09E+00 | 1.71E-17 | 2.43E-16 |
| ENSG00000100311 | PDGFB      | 2.88E+00 | 1.75E-17 | 2.49E-16 |
| ENSG00000182795 | C1orf116   | 6.38E+00 | 1.78E-17 | 2.52E-16 |
| ENSG00000171105 | INSR       | 1.56E+00 | 1.82E-17 | 2.58E-16 |
| ENSG00000109107 | ALDOC      | 5.03E+00 | 1.84E-17 | 2.59E-16 |
| ENSG00000048740 | CELF2      | 6.06E+00 | 1.85E-17 | 2.61E-16 |
| ENSG00000231290 | APCDD1L-DT | 2.67E+00 | 1.95E-17 | 2.75E-16 |
| ENSG00000013364 | MVP        | 2.25E+00 | 2.05E-17 | 2.90E-16 |
| ENSG00000186642 | PDE2A      | 4.61E+00 | 2.15E-17 | 3.03E-16 |

|                 |            |          |          |          |
|-----------------|------------|----------|----------|----------|
| ENSG00000130477 | UNC13A     | 4.68E+00 | 2.16E-17 | 3.05E-16 |
| ENSG00000124104 | SNX21      | 1.33E+00 | 2.23E-17 | 3.13E-16 |
| ENSG00000159388 | BTG2       | 1.83E+00 | 2.24E-17 | 3.14E-16 |
| ENSG00000175470 | PPP2R2D    | 1.27E+00 | 2.25E-17 | 3.15E-16 |
| ENSG00000178934 | LGALS7B    | 7.02E+00 | 2.38E-17 | 3.33E-16 |
| ENSG00000101180 | HRH3       | 6.93E+00 | 2.41E-17 | 3.37E-16 |
| ENSG00000113070 | HBEGF      | 1.42E+00 | 2.48E-17 | 3.47E-16 |
| ENSG00000197780 | TAF13      | 1.44E+00 | 2.53E-17 | 3.54E-16 |
| ENSG00000156026 | MCU        | 1.30E+00 | 2.62E-17 | 3.66E-16 |
| ENSG00000126214 | KLC1       | 1.43E+00 | 2.82E-17 | 3.93E-16 |
| ENSG00000133703 | KRAS       | 1.15E+00 | 2.84E-17 | 3.97E-16 |
| ENSG00000174564 | IL20RB     | 4.47E+00 | 2.88E-17 | 4.01E-16 |
| ENSG00000006453 | BAIAP2L1   | 1.26E+00 | 3.10E-17 | 4.30E-16 |
| ENSG00000140199 | SLC12A6    | 2.24E+00 | 3.12E-17 | 4.34E-16 |
| ENSG00000160209 | PDXK       | 1.30E+00 | 3.35E-17 | 4.65E-16 |
| ENSG00000196208 | GREB1      | 3.54E+00 | 3.54E-17 | 4.90E-16 |
| ENSG00000238045 | AC009133.1 | 5.59E+00 | 3.60E-17 | 4.98E-16 |
| ENSG00000105409 | ATP1A3     | 4.16E+00 | 3.65E-17 | 5.04E-16 |
| ENSG00000130055 | GDPD2      | 6.39E+00 | 3.84E-17 | 5.30E-16 |
| ENSG00000189319 | FAM53B     | 1.61E+00 | 3.99E-17 | 5.51E-16 |
| ENSG00000121552 | CSTA       | 4.16E+00 | 4.02E-17 | 5.55E-16 |
| ENSG00000069956 | MAPK6      | 1.33E+00 | 4.48E-17 | 6.16E-16 |
| ENSG00000116213 | WRAP73     | 1.39E+00 | 4.53E-17 | 6.23E-16 |
| ENSG00000075426 | FOSL2      | 1.36E+00 | 4.66E-17 | 6.40E-16 |
| ENSG00000198074 | AKR1B10    | 3.87E+00 | 4.79E-17 | 6.57E-16 |
| ENSG00000150457 | LATS2      | 2.10E+00 | 5.10E-17 | 6.97E-16 |
| ENSG00000171794 | UTF1       | 6.82E+00 | 5.48E-17 | 7.49E-16 |
| ENSG00000131771 | PPP1R1B    | 6.54E+00 | 5.49E-17 | 7.50E-16 |
| ENSG00000131941 | RHPN2      | 1.67E+00 | 5.94E-17 | 8.10E-16 |
| ENSG00000135638 | EMX1       | 5.99E+00 | 6.00E-17 | 8.18E-16 |
| ENSG00000059804 | SLC2A3     | 1.47E+00 | 6.02E-17 | 8.19E-16 |
| ENSG00000240194 | CYMP       | 6.65E+00 | 6.32E-17 | 8.60E-16 |
| ENSG00000169118 | CSNK1G1    | 1.54E+00 | 6.62E-17 | 8.99E-16 |
| ENSG00000064932 | SBNO2      | 1.06E+00 | 6.99E-17 | 9.47E-16 |
| ENSG00000138834 | MAPK8IP3   | 2.25E+00 | 7.20E-17 | 9.73E-16 |
| ENSG00000177169 | ULK1       | 1.76E+00 | 7.33E-17 | 9.89E-16 |
| ENSG00000125089 | SH3TC1     | 3.30E+00 | 7.37E-17 | 9.94E-16 |
| ENSG00000163347 | CLDN1      | 3.65E+00 | 8.47E-17 | 1.14E-15 |
| ENSG00000067606 | PRKCZ      | 1.69E+00 | 8.66E-17 | 1.16E-15 |
| ENSG00000128923 | MINDY2     | 1.56E+00 | 8.87E-17 | 1.19E-15 |

|                 |            |          |          |          |
|-----------------|------------|----------|----------|----------|
| ENSG00000243225 | AC007686.1 | 3.15E+00 | 9.20E-17 | 1.23E-15 |
| ENSG00000119686 | FLVCR2     | 3.75E+00 | 9.23E-17 | 1.24E-15 |
| ENSG00000092054 | MYH7       | 6.43E+00 | 9.44E-17 | 1.26E-15 |
| ENSG00000130640 | TUBGCP2    | 1.06E+00 | 9.85E-17 | 1.32E-15 |
| ENSG00000166183 | ASPG       | 6.39E+00 | 1.01E-16 | 1.35E-15 |
| ENSG00000186635 | ARAP1      | 1.68E+00 | 1.03E-16 | 1.37E-15 |
| ENSG00000127578 | WFIKKN1    | 4.96E+00 | 1.08E-16 | 1.43E-15 |
| ENSG00000060069 | CTDP1      | 1.90E+00 | 1.13E-16 | 1.50E-15 |
| ENSG00000135363 | LMO2       | 6.37E+00 | 1.15E-16 | 1.53E-15 |
| ENSG00000156299 | TIAM1      | 2.65E+00 | 1.16E-16 | 1.54E-15 |
| ENSG00000177042 | TMEM80     | 2.39E+00 | 1.31E-16 | 1.74E-15 |
| ENSG00000087074 | PPP1R15A   | 1.75E+00 | 1.39E-16 | 1.84E-15 |
| ENSG00000164463 | CREBRF     | 2.05E+00 | 1.40E-16 | 1.85E-15 |
| ENSG00000182378 | PLCXD1     | 1.86E+00 | 1.42E-16 | 1.88E-15 |
| ENSG00000104497 | SNX16      | 1.24E+00 | 1.43E-16 | 1.89E-15 |
| ENSG00000176973 | FAM89B     | 2.23E+00 | 1.45E-16 | 1.91E-15 |
| ENSG00000099834 | CDHR5      | 6.32E+00 | 1.47E-16 | 1.94E-15 |
| ENSG00000099849 | RASSF7     | 2.13E+00 | 1.47E-16 | 1.94E-15 |
| ENSG00000172818 | OVOL1      | 6.18E+00 | 1.51E-16 | 1.99E-15 |
| ENSG00000143816 | WNT9A      | 5.13E+00 | 1.54E-16 | 2.02E-15 |
| ENSG00000157445 | CACNA2D3   | 5.89E+00 | 1.63E-16 | 2.13E-15 |
| ENSG00000183020 | AP2A2      | 1.27E+00 | 1.69E-16 | 2.21E-15 |
| ENSG00000196155 | PLEKHG4    | 5.22E+00 | 1.72E-16 | 2.26E-15 |
| ENSG00000109814 | UGDH       | 1.36E+00 | 1.95E-16 | 2.54E-15 |
| ENSG00000166377 | ATP9B      | 2.99E+00 | 2.19E-16 | 2.85E-15 |
| ENSG00000167771 | RCOR2      | 2.99E+00 | 2.21E-16 | 2.87E-15 |
| ENSG00000168556 | ING2       | 1.07E+00 | 2.32E-16 | 3.02E-15 |
| ENSG00000128340 | RAC2       | 5.58E+00 | 2.45E-16 | 3.19E-15 |
| ENSG00000141574 | SECTM1     | 3.80E+00 | 2.47E-16 | 3.21E-15 |
| ENSG00000013288 | MAN2B2     | 1.77E+00 | 2.59E-16 | 3.35E-15 |
| ENSG00000138207 | RBP4       | 3.97E+00 | 2.82E-16 | 3.65E-15 |
| ENSG00000197380 | DACT3      | 2.45E+00 | 2.97E-16 | 3.83E-15 |
| ENSG00000225697 | SLC26A6    | 1.45E+00 | 3.01E-16 | 3.88E-15 |
| ENSG00000156273 | BACH1      | 1.24E+00 | 3.19E-16 | 4.11E-15 |
| ENSG00000278195 | SSTR3      | 6.30E+00 | 3.19E-16 | 4.11E-15 |
| ENSG00000167705 | RILP       | 2.39E+00 | 3.34E-16 | 4.29E-15 |
| ENSG00000176454 | LPCAT4     | 1.94E+00 | 4.13E-16 | 5.28E-15 |
| ENSG00000169926 | KLF13      | 2.77E+00 | 4.15E-16 | 5.31E-15 |
| ENSG00000105974 | CAV1       | 1.63E+00 | 4.22E-16 | 5.39E-15 |
| ENSG00000112559 | MDF1       | 5.12E+00 | 4.40E-16 | 5.62E-15 |

|                 |             |          |          |          |
|-----------------|-------------|----------|----------|----------|
| ENSG00000166446 | CDYL2       | 2.00E+00 | 4.67E-16 | 5.95E-15 |
| ENSG00000273604 | EPOP        | 1.77E+00 | 4.93E-16 | 6.26E-15 |
| ENSG00000168994 | PXDC1       | 1.46E+00 | 5.39E-16 | 6.83E-15 |
| ENSG00000124882 | EREG        | 4.03E+00 | 5.94E-16 | 7.52E-15 |
| ENSG00000007264 | MATK        | 4.61E+00 | 5.97E-16 | 7.55E-15 |
| ENSG00000168447 | SCNN1B      | 6.46E+00 | 6.00E-16 | 7.58E-15 |
| ENSG00000061936 | SFSWAP      | 1.05E+00 | 6.38E-16 | 8.05E-15 |
| ENSG00000164867 | NOS3        | 6.30E+00 | 6.39E-16 | 8.05E-15 |
| ENSG00000164877 | MICALL2     | 1.11E+00 | 6.78E-16 | 8.54E-15 |
| ENSG00000181626 | ANKRD62     | 6.67E+00 | 7.60E-16 | 9.56E-15 |
| ENSG00000257704 | INAFM1      | 1.26E+00 | 7.88E-16 | 9.90E-15 |
| ENSG00000178301 | AQP11       | 3.66E+00 | 7.97E-16 | 1.00E-14 |
| ENSG00000175197 | DDIT3       | 1.68E+00 | 8.00E-16 | 1.00E-14 |
| ENSG00000131242 | RAB11FIP4   | 1.94E+00 | 8.21E-16 | 1.03E-14 |
| ENSG00000104880 | ARHGEF18    | 1.77E+00 | 8.40E-16 | 1.05E-14 |
| ENSG00000135655 | USP15       | 1.22E+00 | 8.52E-16 | 1.06E-14 |
| ENSG00000186111 | PIP5K1C     | 1.58E+00 | 8.96E-16 | 1.12E-14 |
| ENSG00000158246 | TENT5B      | 2.11E+00 | 9.00E-16 | 1.12E-14 |
| ENSG00000130643 | CALY        | 6.30E+00 | 1.02E-15 | 1.26E-14 |
| ENSG00000011198 | ABHD5       | 1.39E+00 | 1.04E-15 | 1.29E-14 |
| ENSG00000181191 | PJA1        | 1.59E+00 | 1.05E-15 | 1.31E-14 |
| ENSG00000135924 | DNAJB2      | 1.16E+00 | 1.06E-15 | 1.32E-14 |
| ENSG00000105229 | PIAS4       | 1.21E+00 | 1.07E-15 | 1.32E-14 |
| ENSG00000168394 | TAP1        | 1.20E+00 | 1.11E-15 | 1.37E-14 |
| ENSG00000104881 | PPP1R13L    | 1.53E+00 | 1.11E-15 | 1.37E-14 |
| ENSG00000178773 | CPNE7       | 3.53E+00 | 1.11E-15 | 1.37E-14 |
| ENSG00000171310 | CHST11      | 2.19E+00 | 1.12E-15 | 1.38E-14 |
| ENSG00000149260 | CAPN5       | 1.39E+00 | 1.14E-15 | 1.41E-14 |
| ENSG00000117143 | UAP1        | 1.23E+00 | 1.24E-15 | 1.53E-14 |
| ENSG00000105298 | CACTIN      | 1.74E+00 | 1.25E-15 | 1.54E-14 |
| ENSG00000134955 | SLC37A2     | 4.13E+00 | 1.28E-15 | 1.58E-14 |
| ENSG00000184350 | MRGBPRE     | 6.19E+00 | 1.29E-15 | 1.58E-14 |
| ENSG00000170677 | SOCS6       | 1.42E+00 | 1.35E-15 | 1.65E-14 |
| ENSG00000129990 | SYT5        | 6.66E+00 | 1.38E-15 | 1.69E-14 |
| ENSG00000087245 | MMP2        | 1.69E+00 | 1.41E-15 | 1.73E-14 |
| ENSG00000135750 | KCNK1       | 4.27E+00 | 1.43E-15 | 1.75E-14 |
| ENSG00000106992 | AK1         | 1.73E+00 | 1.45E-15 | 1.77E-14 |
| ENSG00000276758 | AC245884.12 | 6.79E+00 | 1.46E-15 | 1.79E-14 |
| ENSG00000166340 | TPP1        | 1.24E+00 | 1.64E-15 | 2.00E-14 |
| ENSG00000138271 | GPR87       | 3.79E+00 | 1.67E-15 | 2.03E-14 |

|                 |          |          |          |          |
|-----------------|----------|----------|----------|----------|
| ENSG00000063978 | RNF4     | 1.19E+00 | 1.92E-15 | 2.33E-14 |
| ENSG00000053747 | LAMA3    | 4.22E+00 | 1.97E-15 | 2.38E-14 |
| ENSG00000157107 | FCHO2    | 1.88E+00 | 1.98E-15 | 2.39E-14 |
| ENSG00000056972 | TRAF3IP2 | 2.20E+00 | 2.16E-15 | 2.61E-14 |
| ENSG00000204389 | HSPA1A   | 1.12E+00 | 2.19E-15 | 2.65E-14 |
| ENSG00000185633 | NDUFA4L2 | 4.96E+00 | 2.22E-15 | 2.69E-14 |
| ENSG00000114541 | FRMD4B   | 3.40E+00 | 2.23E-15 | 2.69E-14 |
| ENSG00000102891 | MT4      | 7.42E+00 | 2.28E-15 | 2.75E-14 |
| ENSG00000170385 | SLC30A1  | 1.76E+00 | 2.32E-15 | 2.80E-14 |
| ENSG00000148826 | NKX6-2   | 6.01E+00 | 2.32E-15 | 2.80E-14 |
| ENSG00000131100 | ATP6V1E1 | 1.46E+00 | 2.37E-15 | 2.85E-14 |
| ENSG00000099812 | MISP     | 6.28E+00 | 2.39E-15 | 2.88E-14 |
| ENSG00000154153 | RETREG1  | 3.90E+00 | 2.66E-15 | 3.20E-14 |
| ENSG00000140332 | TLE3     | 1.28E+00 | 2.89E-15 | 3.46E-14 |
| ENSG00000087253 | LPCAT2   | 1.91E+00 | 2.92E-15 | 3.50E-14 |
| ENSG00000131408 | NR1H2    | 1.34E+00 | 3.36E-15 | 4.02E-14 |
| ENSG00000060656 | PTPRU    | 3.15E+00 | 3.42E-15 | 4.09E-14 |
| ENSG00000184232 | OAF      | 1.63E+00 | 3.45E-15 | 4.12E-14 |
| ENSG00000163814 | CDCP1    | 1.55E+00 | 3.64E-15 | 4.33E-14 |
| ENSG00000102854 | MSLN     | 5.32E+00 | 3.96E-15 | 4.71E-14 |
| ENSG00000066056 | TIE1     | 5.84E+00 | 4.23E-15 | 5.01E-14 |
| ENSG00000173120 | KDM2A    | 1.25E+00 | 4.22E-15 | 5.01E-14 |
| ENSG00000182687 | GALR2    | 4.76E+00 | 4.23E-15 | 5.01E-14 |
| ENSG00000142235 | LMTK3    | 3.48E+00 | 4.38E-15 | 5.18E-14 |
| ENSG00000166589 | CDH16    | 6.52E+00 | 4.64E-15 | 5.48E-14 |
| ENSG00000137267 | TUBB2A   | 1.17E+00 | 4.70E-15 | 5.54E-14 |
| ENSG00000160360 | GPSM1    | 1.47E+00 | 4.77E-15 | 5.61E-14 |
| ENSG00000101624 | CEP76    | 1.43E+00 | 4.87E-15 | 5.73E-14 |
| ENSG00000164237 | CMBL     | 1.68E+00 | 4.98E-15 | 5.84E-14 |
| ENSG00000144485 | HES6     | 1.62E+00 | 5.37E-15 | 6.29E-14 |
| ENSG00000054611 | TBC1D22A | 1.63E+00 | 5.54E-15 | 6.48E-14 |
| ENSG00000006125 | AP2B1    | 1.09E+00 | 5.80E-15 | 6.77E-14 |
| ENSG00000110697 | PITPNM1  | 1.61E+00 | 6.11E-15 | 7.12E-14 |
| ENSG00000100884 | CPNE6    | 6.37E+00 | 6.12E-15 | 7.13E-14 |
| ENSG00000140323 | DISP2    | 4.46E+00 | 6.38E-15 | 7.41E-14 |
| ENSG00000136003 | ISCU     | 1.27E+00 | 6.40E-15 | 7.44E-14 |
| ENSG00000105058 | FAM32A   | 1.12E+00 | 6.41E-15 | 7.44E-14 |
| ENSG00000129910 | CDH15    | 5.08E+00 | 6.52E-15 | 7.56E-14 |
| ENSG00000130600 | H19      | 6.33E+00 | 7.00E-15 | 8.09E-14 |
| ENSG00000000938 | FGR      | 6.21E+00 | 7.02E-15 | 8.11E-14 |



|                 |           |          |          |          |
|-----------------|-----------|----------|----------|----------|
| ENSG00000155846 | PPARGC1B  | 2.45E+00 | 7.22E-15 | 8.33E-14 |
| ENSG00000133961 | NUMB      | 1.16E+00 | 8.24E-15 | 9.47E-14 |
| ENSG00000166311 | SMPD1     | 1.48E+00 | 8.32E-15 | 9.56E-14 |
| ENSG00000131459 | GFPT2     | 1.28E+00 | 8.52E-15 | 9.77E-14 |
| ENSG00000242086 | MUC20-OT1 | 1.90E+00 | 8.91E-15 | 1.02E-13 |
| ENSG00000112782 | CLIC5     | 6.60E+00 | 8.92E-15 | 1.02E-13 |
| ENSG00000162706 | CADM3     | 3.86E+00 | 9.04E-15 | 1.03E-13 |
| ENSG00000101000 | PROCR     | 2.01E+00 | 9.12E-15 | 1.04E-13 |
| ENSG00000131504 | DIAPH1    | 1.12E+00 | 9.99E-15 | 1.14E-13 |
| ENSG00000125378 | BMP4      | 2.30E+00 | 1.03E-14 | 1.17E-13 |
| ENSG00000107140 | TESK1     | 1.45E+00 | 1.05E-14 | 1.20E-13 |
| ENSG00000182606 | TRAK1     | 1.59E+00 | 1.10E-14 | 1.25E-13 |
| ENSG00000188811 | NHLRC3    | 2.05E+00 | 1.13E-14 | 1.28E-13 |
| ENSG00000008323 | PLEKHG6   | 5.71E+00 | 1.15E-14 | 1.30E-13 |
| ENSG00000115457 | IGFBP2    | 2.76E+00 | 1.20E-14 | 1.36E-13 |
| ENSG00000100739 | BDKRB1    | 2.61E+00 | 1.24E-14 | 1.40E-13 |
| ENSG00000197694 | SPTAN1    | 1.77E+00 | 1.26E-14 | 1.42E-13 |
| ENSG00000186204 | CYP4F12   | 6.66E+00 | 1.28E-14 | 1.45E-13 |
| ENSG00000147010 | SH3KBP1   | 1.29E+00 | 1.29E-14 | 1.46E-13 |
| ENSG00000169035 | KLK7      | 6.58E+00 | 1.30E-14 | 1.47E-13 |
| ENSG00000076928 | ARHGEF1   | 1.09E+00 | 1.31E-14 | 1.47E-13 |
| ENSG00000170684 | ZNF296    | 3.38E+00 | 1.32E-14 | 1.48E-13 |
| ENSG00000131015 | ULBP2     | 2.31E+00 | 1.42E-14 | 1.60E-13 |
| ENSG00000237289 | CKMT1B    | 4.55E+00 | 1.43E-14 | 1.60E-13 |
| ENSG00000168528 | SERINC2   | 1.93E+00 | 1.43E-14 | 1.60E-13 |
| ENSG00000070423 | RNF126    | 1.20E+00 | 1.45E-14 | 1.63E-13 |
| ENSG00000115155 | OTOF      | 6.27E+00 | 1.50E-14 | 1.68E-13 |
| ENSG00000248690 | HAS2-AS1  | 4.08E+00 | 1.51E-14 | 1.69E-13 |
| ENSG00000197608 | ZNF841    | 2.93E+00 | 1.59E-14 | 1.78E-13 |
| ENSG00000163435 | ELF3      | 4.58E+00 | 1.63E-14 | 1.82E-13 |
| ENSG00000189190 | ZNF600    | 2.09E+00 | 1.66E-14 | 1.85E-13 |
| ENSG00000213672 | NCKIPSD   | 1.32E+00 | 1.69E-14 | 1.87E-13 |
| ENSG00000108849 | PPY       | 5.96E+00 | 1.75E-14 | 1.94E-13 |
| ENSG00000158109 | TPRG1L    | 1.97E+00 | 1.85E-14 | 2.04E-13 |
| ENSG00000175376 | EIF1AD    | 1.43E+00 | 1.93E-14 | 2.13E-13 |
| ENSG00000156427 | FGF18     | 4.19E+00 | 1.95E-14 | 2.15E-13 |
| ENSG00000127666 | TICAM1    | 1.70E+00 | 1.99E-14 | 2.19E-13 |
| ENSG00000130940 | CASZ1     | 2.71E+00 | 2.01E-14 | 2.21E-13 |
| ENSG00000157570 | TSPAN18   | 3.04E+00 | 2.07E-14 | 2.28E-13 |
| ENSG00000175832 | ETV4      | 1.55E+00 | 2.11E-14 | 2.33E-13 |

|                 |          |          |          |          |
|-----------------|----------|----------|----------|----------|
| ENSG00000257122 | RRN3P3   | 1.82E+00 | 2.22E-14 | 2.43E-13 |
| ENSG00000149792 | MRPL49   | 1.16E+00 | 2.31E-14 | 2.54E-13 |
| ENSG00000241839 | PLEKHO2  | 1.33E+00 | 2.47E-14 | 2.70E-13 |
| ENSG00000196535 | MYO18A   | 1.53E+00 | 2.51E-14 | 2.74E-13 |
| ENSG00000165632 | TAF3     | 1.25E+00 | 2.59E-14 | 2.83E-13 |
| ENSG00000038532 | CLEC16A  | 1.73E+00 | 2.61E-14 | 2.85E-13 |
| ENSG00000154822 | PLCL2    | 4.43E+00 | 2.71E-14 | 2.96E-13 |
| ENSG00000186847 | KRT14    | 9.49E+00 | 2.76E-14 | 3.00E-13 |
| ENSG00000101470 | TNNC2    | 4.39E+00 | 2.82E-14 | 3.07E-13 |
| ENSG00000083812 | ZNF324   | 1.29E+00 | 2.84E-14 | 3.09E-13 |
| ENSG00000040487 | SLC66A1  | 1.69E+00 | 3.11E-14 | 3.36E-13 |
| ENSG00000161267 | BDH1     | 1.97E+00 | 3.39E-14 | 3.66E-13 |
| ENSG00000075568 | TMEM131  | 1.34E+00 | 3.61E-14 | 3.88E-13 |
| ENSG00000119844 | AFTPH    | 1.28E+00 | 3.64E-14 | 3.91E-13 |
| ENSG00000161513 | FDXR     | 1.38E+00 | 3.78E-14 | 4.07E-13 |
| ENSG00000283632 | EXOC3L2  | 6.06E+00 | 3.98E-14 | 4.27E-13 |
| ENSG00000152953 | STK32B   | 1.46E+00 | 4.13E-14 | 4.42E-13 |
| ENSG00000178605 | GTPBP6   | 1.15E+00 | 4.24E-14 | 4.53E-13 |
| ENSG00000196116 | TDRD7    | 2.02E+00 | 4.39E-14 | 4.70E-13 |
| ENSG00000197273 | GUCA2A   | 6.27E+00 | 4.56E-14 | 4.87E-13 |
| ENSG00000154358 | OBSCN    | 3.45E+00 | 4.60E-14 | 4.91E-13 |
| ENSG00000106003 | LFNG     | 1.87E+00 | 4.90E-14 | 5.22E-13 |
| ENSG00000006459 | KDM7A    | 2.26E+00 | 4.95E-14 | 5.26E-13 |
| ENSG00000136856 | SLC2A8   | 2.15E+00 | 5.03E-14 | 5.34E-13 |
| ENSG00000141968 | VAV1     | 5.09E+00 | 5.04E-14 | 5.35E-13 |
| ENSG00000170855 | TRIAP1   | 1.15E+00 | 5.13E-14 | 5.44E-13 |
| ENSG00000156860 | FBRS     | 1.04E+00 | 5.33E-14 | 5.65E-13 |
| ENSG00000153922 | CHD1     | 1.29E+00 | 5.42E-14 | 5.74E-13 |
| ENSG00000137266 | SLC22A23 | 2.89E+00 | 5.56E-14 | 5.89E-13 |
| ENSG00000135253 | KCP      | 5.32E+00 | 5.61E-14 | 5.94E-13 |
| ENSG00000205076 | LGALS7   | 7.08E+00 | 6.17E-14 | 6.51E-13 |
| ENSG00000172830 | SSH3     | 1.84E+00 | 6.19E-14 | 6.52E-13 |
| ENSG00000132470 | ITGB4    | 3.55E+00 | 6.21E-14 | 6.55E-13 |
| ENSG00000095539 | SEMA4G   | 2.32E+00 | 6.45E-14 | 6.79E-13 |
| ENSG00000160326 | SLC2A6   | 1.46E+00 | 6.62E-14 | 6.95E-13 |
| ENSG00000107187 | LHX3     | 4.99E+00 | 7.17E-14 | 7.51E-13 |
| ENSG00000121769 | FABP3    | 6.00E+00 | 8.00E-14 | 8.36E-13 |
| ENSG00000162104 | ADCY9    | 1.73E+00 | 8.51E-14 | 8.87E-13 |
| ENSG00000223802 | CERS1    | 1.49E+00 | 9.07E-14 | 9.45E-13 |
| ENSG00000103326 | CAPN15   | 1.14E+00 | 9.41E-14 | 9.78E-13 |

|                 |            |          |          |          |
|-----------------|------------|----------|----------|----------|
| ENSG00000113555 | PCDH12     | 6.04E+00 | 9.41E-14 | 9.78E-13 |
| ENSG00000183018 | SPNS2      | 5.36E+00 | 9.64E-14 | 1.00E-12 |
| ENSG00000141577 | CEP131     | 1.48E+00 | 9.70E-14 | 1.01E-12 |
| ENSG00000130054 | FAM155B    | 4.22E+00 | 9.95E-14 | 1.03E-12 |
| ENSG00000163827 | LRRC2      | 4.48E+00 | 1.06E-13 | 1.10E-12 |
| ENSG00000114315 | HES1       | 1.04E+00 | 1.07E-13 | 1.11E-12 |
| ENSG00000110422 | HIPK3      | 1.31E+00 | 1.08E-13 | 1.12E-12 |
| ENSG00000092051 | JPH4       | 4.31E+00 | 1.11E-13 | 1.14E-12 |
| ENSG00000154930 | ACSS1      | 2.51E+00 | 1.36E-13 | 1.39E-12 |
| ENSG00000107404 | DVL1       | 1.28E+00 | 1.42E-13 | 1.46E-12 |
| ENSG00000181467 | RAP2B      | 1.52E+00 | 1.42E-13 | 1.46E-12 |
| ENSG00000136717 | BIN1       | 1.27E+00 | 1.46E-13 | 1.50E-12 |
| ENSG00000100796 | PPP4R3A    | 1.29E+00 | 1.47E-13 | 1.50E-12 |
| ENSG00000197119 | SLC25A29   | 1.54E+00 | 1.49E-13 | 1.53E-12 |
| ENSG00000186174 | BCL9L      | 1.56E+00 | 1.52E-13 | 1.56E-12 |
| ENSG00000171540 | OTP        | 6.62E+00 | 1.55E-13 | 1.58E-12 |
| ENSG00000134363 | FST        | 2.48E+00 | 1.60E-13 | 1.63E-12 |
| ENSG00000181649 | PHLDA2     | 1.55E+00 | 1.65E-13 | 1.69E-12 |
| ENSG00000145990 | GFOD1      | 1.95E+00 | 1.74E-13 | 1.77E-12 |
| ENSG00000254827 | SLC22A18AS | 6.67E+00 | 1.74E-13 | 1.77E-12 |
| ENSG00000144711 | IQSEC1     | 1.46E+00 | 1.82E-13 | 1.85E-12 |
| ENSG00000103264 | FBXO31     | 1.32E+00 | 1.82E-13 | 1.85E-12 |
| ENSG00000130222 | GADD45G    | 4.35E+00 | 1.83E-13 | 1.85E-12 |
| ENSG00000167797 | CDK2AP2    | 1.42E+00 | 1.83E-13 | 1.86E-12 |
| ENSG00000130193 | THEM6      | 1.86E+00 | 1.95E-13 | 1.97E-12 |
| ENSG00000169217 | CD2BP2     | 1.09E+00 | 2.00E-13 | 2.02E-12 |
| ENSG00000074964 | ARHGEF10L  | 2.00E+00 | 2.02E-13 | 2.04E-12 |
| ENSG00000229314 | ORM1       | 6.18E+00 | 2.09E-13 | 2.11E-12 |
| ENSG00000106976 | DNM1       | 2.05E+00 | 2.37E-13 | 2.38E-12 |
| ENSG00000099377 | HSD3B7     | 3.36E+00 | 2.48E-13 | 2.49E-12 |
| ENSG00000133818 | RRAS2      | 1.10E+00 | 2.50E-13 | 2.51E-12 |
| ENSG00000160862 | AZGP1      | 6.33E+00 | 2.58E-13 | 2.58E-12 |
| ENSG00000102897 | LYRM1      | 1.45E+00 | 2.61E-13 | 2.61E-12 |
| ENSG00000054179 | ENTPD2     | 4.17E+00 | 2.67E-13 | 2.67E-12 |
| ENSG00000103042 | SLC38A7    | 1.09E+00 | 2.70E-13 | 2.69E-12 |
| ENSG00000109220 | CHIC2      | 2.09E+00 | 2.77E-13 | 2.76E-12 |
| ENSG00000186481 | ANKRD20A5P | 2.64E+00 | 2.85E-13 | 2.84E-12 |
| ENSG00000106018 | VIPR2      | 5.81E+00 | 2.96E-13 | 2.94E-12 |
| ENSG00000163694 | RBM47      | 1.76E+00 | 3.01E-13 | 3.00E-12 |
| ENSG00000100276 | RASL10A    | 5.36E+00 | 3.11E-13 | 3.09E-12 |

|                 |            |          |          |          |
|-----------------|------------|----------|----------|----------|
| ENSG00000175264 | CHST1      | 2.40E+00 | 3.34E-13 | 3.32E-12 |
| ENSG00000260912 | AL158206.1 | 2.66E+00 | 3.35E-13 | 3.33E-12 |
| ENSG00000013563 | DNASE1L1   | 2.43E+00 | 3.50E-13 | 3.47E-12 |
| ENSG00000157601 | MX1        | 4.15E+00 | 3.51E-13 | 3.47E-12 |
| ENSG00000251322 | SHANK3     | 2.12E+00 | 3.51E-13 | 3.48E-12 |
| ENSG00000276023 | DUSP14     | 1.30E+00 | 3.58E-13 | 3.54E-12 |
| ENSG00000137449 | CPEB2      | 2.45E+00 | 3.66E-13 | 3.61E-12 |
| ENSG00000187730 | GABRD      | 2.82E+00 | 3.75E-13 | 3.71E-12 |
| ENSG00000082397 | EPB41L3    | 4.19E+00 | 3.78E-13 | 3.73E-12 |
| ENSG00000088367 | EPB41L1    | 1.49E+00 | 3.79E-13 | 3.74E-12 |
| ENSG00000005007 | UPF1       | 1.27E+00 | 3.86E-13 | 3.80E-12 |
| ENSG00000064687 | ABCA7      | 2.59E+00 | 4.39E-13 | 4.32E-12 |
| ENSG00000164916 | FOXK1      | 1.48E+00 | 4.45E-13 | 4.37E-12 |
| ENSG00000154133 | ROBO4      | 3.80E+00 | 4.52E-13 | 4.45E-12 |
| ENSG00000164050 | PLXNB1     | 1.71E+00 | 4.57E-13 | 4.49E-12 |
| ENSG00000081059 | TCF7       | 1.30E+00 | 4.64E-13 | 4.56E-12 |
| ENSG00000102760 | RGCC       | 6.34E+00 | 4.70E-13 | 4.61E-12 |
| ENSG00000105643 | ARRDC2     | 1.30E+00 | 4.72E-13 | 4.62E-12 |
| ENSG00000116786 | PLEKHM2    | 1.16E+00 | 4.72E-13 | 4.62E-12 |
| ENSG00000100292 | HMOX1      | 2.31E+00 | 4.85E-13 | 4.75E-12 |
| ENSG00000204604 | ZNF468     | 2.13E+00 | 4.98E-13 | 4.86E-12 |
| ENSG00000223573 | TINCR      | 3.88E+00 | 5.20E-13 | 5.08E-12 |
| ENSG00000099625 | CBARP      | 2.57E+00 | 5.36E-13 | 5.22E-12 |
| ENSG00000138193 | PLCE1      | 1.91E+00 | 5.79E-13 | 5.63E-12 |
| ENSG00000124159 | MATN4      | 4.38E+00 | 5.92E-13 | 5.76E-12 |
| ENSG00000108262 | GIT1       | 1.17E+00 | 6.04E-13 | 5.86E-12 |
| ENSG00000167723 | TRPV3      | 6.03E+00 | 6.07E-13 | 5.89E-12 |
| ENSG00000143367 | TUFT1      | 1.51E+00 | 6.11E-13 | 5.93E-12 |
| ENSG00000164051 | CCDC51     | 1.43E+00 | 6.49E-13 | 6.30E-12 |
| ENSG00000167676 | PLIN4      | 3.76E+00 | 6.77E-13 | 6.56E-12 |
| ENSG00000099860 | GADD45B    | 1.53E+00 | 7.17E-13 | 6.93E-12 |
| ENSG00000089159 | PXN        | 1.17E+00 | 7.18E-13 | 6.93E-12 |
| ENSG00000170961 | HAS2       | 2.25E+00 | 7.20E-13 | 6.96E-12 |
| ENSG00000186115 | CYP4F2     | 5.33E+00 | 7.68E-13 | 7.42E-12 |
| ENSG00000126368 | NR1D1      | 2.81E+00 | 7.77E-13 | 7.49E-12 |
| ENSG00000100985 | MMP9       | 2.28E+00 | 7.79E-13 | 7.50E-12 |
| ENSG00000128159 | TUBGCP6    | 2.26E+00 | 7.94E-13 | 7.64E-12 |
| ENSG00000125850 | OVOL2      | 5.96E+00 | 8.02E-13 | 7.70E-12 |
| ENSG00000136943 | CTSV       | 1.16E+00 | 8.45E-13 | 8.10E-12 |
| ENSG00000115685 | PPP1R7     | 1.09E+00 | 8.58E-13 | 8.21E-12 |

|                 |            |          |          |          |
|-----------------|------------|----------|----------|----------|
| ENSG00000160932 | LY6E       | 1.73E+00 | 8.57E-13 | 8.21E-12 |
| ENSG00000039068 | CDH1       | 4.72E+00 | 8.85E-13 | 8.47E-12 |
| ENSG00000274602 | PI4KAP1    | 2.27E+00 | 8.98E-13 | 8.59E-12 |
| ENSG00000171813 | PWWP2B     | 1.86E+00 | 9.26E-13 | 8.84E-12 |
| ENSG00000066027 | PPP2R5A    | 1.44E+00 | 9.36E-13 | 8.93E-12 |
| ENSG00000226490 | AC138647.1 | 6.11E+00 | 9.41E-13 | 8.97E-12 |
| ENSG00000142675 | CNKSR1     | 5.68E+00 | 9.66E-13 | 9.20E-12 |
| ENSG00000189120 | SP6        | 2.29E+00 | 9.87E-13 | 9.40E-12 |
| ENSG00000118454 | ANKRD13C   | 1.10E+00 | 1.02E-12 | 9.68E-12 |
| ENSG00000082996 | RNF13      | 1.37E+00 | 1.09E-12 | 1.03E-11 |
| ENSG00000140279 | DUOX2      | 6.42E+00 | 1.14E-12 | 1.08E-11 |
| ENSG00000080031 | PTPRH      | 3.31E+00 | 1.23E-12 | 1.16E-11 |
| ENSG00000142173 | COL6A2     | 1.01E+00 | 1.24E-12 | 1.17E-11 |
| ENSG00000089327 | FXVD5      | 1.04E+00 | 1.26E-12 | 1.19E-11 |
| ENSG00000242265 | PEG10      | 1.76E+00 | 1.29E-12 | 1.22E-11 |
| ENSG00000141753 | IGFBP4     | 1.19E+00 | 1.38E-12 | 1.29E-11 |
| ENSG00000197019 | SERTAD1    | 1.60E+00 | 1.47E-12 | 1.37E-11 |
| ENSG00000130244 | FAM98C     | 1.65E+00 | 1.50E-12 | 1.40E-11 |
| ENSG00000161082 | CELF5      | 3.50E+00 | 1.51E-12 | 1.41E-11 |
| ENSG00000168546 | GFRA2      | 5.92E+00 | 1.51E-12 | 1.41E-11 |
| ENSG00000151117 | TMEM86A    | 3.32E+00 | 1.52E-12 | 1.42E-11 |
| ENSG00000260916 | CCPG1      | 1.53E+00 | 1.55E-12 | 1.45E-11 |
| ENSG00000136754 | ABI1       | 1.41E+00 | 1.59E-12 | 1.48E-11 |
| ENSG00000215712 | TMEM242    | 1.18E+00 | 1.62E-12 | 1.51E-11 |
| ENSG00000112837 | TBX18      | 1.44E+00 | 1.75E-12 | 1.62E-11 |
| ENSG00000244242 | IFITM10    | 5.92E+00 | 1.76E-12 | 1.64E-11 |
| ENSG00000143842 | SOX13      | 1.75E+00 | 1.80E-12 | 1.67E-11 |
| ENSG00000155066 | PROM2      | 5.50E+00 | 1.90E-12 | 1.75E-11 |
| ENSG00000214193 | SH3D21     | 2.22E+00 | 1.96E-12 | 1.81E-11 |
| ENSG00000185291 | IL3RA      | 5.79E+00 | 2.07E-12 | 1.91E-11 |
| ENSG00000182240 | BACE2      | 1.01E+00 | 2.09E-12 | 1.92E-11 |
| ENSG00000275329 | AL138781.1 | 4.66E+00 | 2.09E-12 | 1.92E-11 |
| ENSG00000167785 | ZNF558     | 1.95E+00 | 2.15E-12 | 1.98E-11 |
| ENSG00000249673 | NOP14-AS1  | 2.69E+00 | 2.22E-12 | 2.04E-11 |
| ENSG00000197417 | SHPK       | 1.56E+00 | 2.23E-12 | 2.05E-11 |
| ENSG00000161091 | MFSD12     | 1.35E+00 | 2.26E-12 | 2.07E-11 |
| ENSG00000148158 | SNX30      | 1.69E+00 | 2.26E-12 | 2.07E-11 |
| ENSG00000036448 | MYOM2      | 2.09E+00 | 2.28E-12 | 2.09E-11 |
| ENSG00000124466 | LYPD3      | 3.28E+00 | 2.41E-12 | 2.21E-11 |
| ENSG00000144550 | CPNE9      | 5.85E+00 | 2.50E-12 | 2.29E-11 |

|                 |            |          |          |          |
|-----------------|------------|----------|----------|----------|
| ENSG00000180644 | PRF1       | 5.99E+00 | 2.54E-12 | 2.32E-11 |
| ENSG00000251095 | AC093866.1 | 4.82E+00 | 2.56E-12 | 2.34E-11 |
| ENSG00000166484 | MAPK7      | 1.70E+00 | 2.57E-12 | 2.34E-11 |
| ENSG00000138119 | MYOF       | 1.10E+00 | 2.60E-12 | 2.37E-11 |
| ENSG00000142867 | BCL10      | 1.43E+00 | 2.68E-12 | 2.44E-11 |
| ENSG00000164619 | BMPER      | 4.34E+00 | 2.80E-12 | 2.54E-11 |
| ENSG00000159363 | ATP13A2    | 1.65E+00 | 2.81E-12 | 2.55E-11 |
| ENSG00000119522 | DENND1A    | 1.26E+00 | 3.12E-12 | 2.83E-11 |
| ENSG00000124302 | CHST8      | 4.90E+00 | 3.17E-12 | 2.87E-11 |
| ENSG00000142765 | SYTL1      | 3.16E+00 | 3.20E-12 | 2.89E-11 |
| ENSG00000095637 | SORBS1     | 2.50E+00 | 3.28E-12 | 2.96E-11 |
| ENSG00000198156 | NPIPB6     | 5.42E+00 | 3.31E-12 | 2.98E-11 |
| ENSG00000197122 | SRC        | 1.12E+00 | 3.41E-12 | 3.07E-11 |
| ENSG00000110046 | ATG2A      | 1.79E+00 | 3.53E-12 | 3.17E-11 |
| ENSG00000159069 | FBXW5      | 1.03E+00 | 3.56E-12 | 3.19E-11 |
| ENSG00000166863 | TAC3       | 4.93E+00 | 3.56E-12 | 3.20E-11 |
| ENSG00000227500 | SCAMP4     | 1.12E+00 | 3.57E-12 | 3.20E-11 |
| ENSG00000188897 | AC099489.1 | 5.20E+00 | 3.68E-12 | 3.30E-11 |
| ENSG00000137177 | KIF13A     | 1.30E+00 | 3.69E-12 | 3.30E-11 |
| ENSG00000133131 | MORC4      | 1.44E+00 | 3.79E-12 | 3.39E-11 |
| ENSG00000137831 | UACA       | 1.08E+00 | 3.80E-12 | 3.39E-11 |
| ENSG00000071894 | CPSF1      | 1.06E+00 | 3.83E-12 | 3.42E-11 |
| ENSG00000105464 | GRIN2D     | 6.03E+00 | 4.07E-12 | 3.63E-11 |
| ENSG00000211445 | GPX3       | 1.05E+00 | 4.21E-12 | 3.75E-11 |
| ENSG00000118292 | C1orf54    | 4.30E+00 | 4.28E-12 | 3.81E-11 |
| ENSG00000001461 | NIPAL3     | 1.74E+00 | 4.65E-12 | 4.13E-11 |
| ENSG00000120868 | APAF1      | 1.79E+00 | 4.67E-12 | 4.14E-11 |
| ENSG00000116299 | KIAA1324   | 3.25E+00 | 4.68E-12 | 4.16E-11 |
| ENSG00000063241 | ISOC2      | 1.96E+00 | 4.94E-12 | 4.38E-11 |
| ENSG00000117983 | MUC5B      | 5.72E+00 | 4.98E-12 | 4.41E-11 |
| ENSG00000168907 | PLA2G4F    | 6.03E+00 | 5.04E-12 | 4.47E-11 |
| ENSG00000198729 | PPP1R14C   | 3.02E+00 | 5.11E-12 | 4.52E-11 |
| ENSG00000132376 | INPP5K     | 1.59E+00 | 5.19E-12 | 4.59E-11 |
| ENSG00000109927 | TECTA      | 6.73E+00 | 5.40E-12 | 4.76E-11 |
| ENSG00000270765 | GAS2L2     | 6.53E+00 | 5.40E-12 | 4.76E-11 |
| ENSG00000173714 | WFIKKN2    | 6.09E+00 | 5.50E-12 | 4.84E-11 |
| ENSG00000156535 | CD109      | 1.15E+00 | 5.59E-12 | 4.91E-11 |
| ENSG00000164690 | SHH        | 6.38E+00 | 5.60E-12 | 4.93E-11 |
| ENSG00000269958 | AL049840.5 | 1.60E+00 | 5.97E-12 | 5.23E-11 |
| ENSG00000224294 | PINCR      | 4.16E+00 | 5.97E-12 | 5.24E-11 |

|                 |            |          |          |          |
|-----------------|------------|----------|----------|----------|
| ENSG00000162723 | SLAMF9     | 5.97E+00 | 5.98E-12 | 5.24E-11 |
| ENSG00000082438 | COBLL1     | 2.84E+00 | 6.12E-12 | 5.35E-11 |
| ENSG00000074527 | NTN4       | 3.08E+00 | 6.24E-12 | 5.46E-11 |
| ENSG00000140836 | ZFHX3      | 1.22E+00 | 6.33E-12 | 5.53E-11 |
| ENSG00000127129 | EDN2       | 5.13E+00 | 6.37E-12 | 5.56E-11 |
| ENSG00000073417 | PDE8A      | 1.05E+00 | 6.41E-12 | 5.60E-11 |
| ENSG00000126107 | HECTD3     | 1.78E+00 | 6.43E-12 | 5.61E-11 |
| ENSG00000162522 | KIAA1522   | 1.29E+00 | 6.43E-12 | 5.61E-11 |
| ENSG00000141452 | RMC1       | 1.20E+00 | 6.80E-12 | 5.92E-11 |
| ENSG00000092148 | HECTD1     | 1.28E+00 | 7.18E-12 | 6.25E-11 |
| ENSG00000103496 | STX4       | 1.25E+00 | 7.18E-12 | 6.25E-11 |
| ENSG00000166086 | JAM3       | 1.00E+00 | 7.30E-12 | 6.35E-11 |
| ENSG00000183114 | FAM43B     | 2.27E+00 | 7.32E-12 | 6.36E-11 |
| ENSG00000105251 | SHD        | 5.61E+00 | 7.47E-12 | 6.48E-11 |
| ENSG00000179119 | SPTY2D1    | 1.16E+00 | 7.63E-12 | 6.61E-11 |
| ENSG00000137500 | CCDC90B    | 1.04E+00 | 7.66E-12 | 6.64E-11 |
| ENSG00000171970 | ZNF57      | 2.67E+00 | 7.73E-12 | 6.69E-11 |
| ENSG00000131149 | GSE1       | 1.22E+00 | 7.74E-12 | 6.70E-11 |
| ENSG00000250920 | AC105460.1 | 6.00E+00 | 7.91E-12 | 6.85E-11 |
| ENSG00000127452 | FBXL12     | 1.03E+00 | 7.98E-12 | 6.90E-11 |
| ENSG00000167434 | CA4        | 5.37E+00 | 8.02E-12 | 6.93E-11 |
| ENSG00000183734 | ASCL2      | 6.01E+00 | 8.10E-12 | 6.99E-11 |
| ENSG00000164855 | TMEM184A   | 1.78E+00 | 8.26E-12 | 7.13E-11 |
| ENSG00000103528 | SYT17      | 5.17E+00 | 8.37E-12 | 7.21E-11 |
| ENSG00000183087 | GAS6       | 1.15E+00 | 8.81E-12 | 7.58E-11 |
| ENSG00000048405 | ZNF800     | 1.26E+00 | 8.84E-12 | 7.60E-11 |
| ENSG00000185479 | KRT6B      | 5.38E+00 | 9.03E-12 | 7.76E-11 |
| ENSG00000103249 | CLCN7      | 1.10E+00 | 9.20E-12 | 7.90E-11 |
| ENSG00000006432 | MAP3K9     | 1.63E+00 | 9.33E-12 | 8.00E-11 |
| ENSG00000076864 | RAP1GAP    | 2.52E+00 | 1.04E-11 | 8.90E-11 |
| ENSG00000092330 | TINF2      | 1.42E+00 | 1.04E-11 | 8.92E-11 |
| ENSG00000197415 | VEPH1      | 5.09E+00 | 1.07E-11 | 9.10E-11 |
| ENSG00000099821 | POLRMT     | 1.01E+00 | 1.16E-11 | 9.92E-11 |
| ENSG00000221986 | MYBPHL     | 5.77E+00 | 1.19E-11 | 1.01E-10 |
| ENSG00000197774 | EME2       | 2.23E+00 | 1.26E-11 | 1.07E-10 |
| ENSG00000161542 | PRPSAP1    | 1.08E+00 | 1.28E-11 | 1.09E-10 |
| ENSG00000243279 | PRAF2      | 1.31E+00 | 1.29E-11 | 1.09E-10 |
| ENSG00000180758 | GPR157     | 1.69E+00 | 1.30E-11 | 1.10E-10 |
| ENSG00000105053 | VRK3       | 1.16E+00 | 1.32E-11 | 1.12E-10 |
| ENSG00000185485 | SDHAP1     | 1.86E+00 | 1.35E-11 | 1.14E-10 |

|                 |            |          |          |          |
|-----------------|------------|----------|----------|----------|
| ENSG00000163273 | NPPC       | 4.23E+00 | 1.40E-11 | 1.19E-10 |
| ENSG00000182866 | LCK        | 4.54E+00 | 1.48E-11 | 1.25E-10 |
| ENSG00000152503 | TRIM36     | 2.82E+00 | 1.48E-11 | 1.25E-10 |
| ENSG00000156983 | BRPF1      | 1.29E+00 | 1.50E-11 | 1.26E-10 |
| ENSG00000204388 | HSPA1B     | 1.16E+00 | 1.57E-11 | 1.32E-10 |
| ENSG00000185033 | SEMA4B     | 1.59E+00 | 1.61E-11 | 1.35E-10 |
| ENSG00000155366 | RHOC       | 1.84E+00 | 1.64E-11 | 1.38E-10 |
| ENSG00000183578 | TNFAIP8L3  | 4.79E+00 | 1.65E-11 | 1.39E-10 |
| ENSG00000183092 | BEGAIN     | 4.62E+00 | 1.67E-11 | 1.40E-10 |
| ENSG00000100604 | CHGA       | 5.96E+00 | 1.74E-11 | 1.46E-10 |
| ENSG00000135241 | PNPLA8     | 1.21E+00 | 1.74E-11 | 1.46E-10 |
| ENSG00000181381 | DDX60L     | 2.18E+00 | 1.77E-11 | 1.48E-10 |
| ENSG00000162494 | LRRC38     | 5.22E+00 | 1.90E-11 | 1.59E-10 |
| ENSG00000108823 | SGCA       | 5.15E+00 | 1.97E-11 | 1.64E-10 |
| ENSG00000049089 | COL9A2     | 3.36E+00 | 1.98E-11 | 1.65E-10 |
| ENSG00000219607 | PPP1R3G    | 3.21E+00 | 2.01E-11 | 1.67E-10 |
| ENSG00000167880 | EVPL       | 5.88E+00 | 2.07E-11 | 1.72E-10 |
| ENSG00000165695 | AK8        | 4.50E+00 | 2.07E-11 | 1.72E-10 |
| ENSG00000198408 | OGA        | 1.27E+00 | 2.13E-11 | 1.77E-10 |
| ENSG00000143674 | MAP3K21    | 2.71E+00 | 2.17E-11 | 1.80E-10 |
| ENSG00000205277 | MUC12      | 3.88E+00 | 2.18E-11 | 1.80E-10 |
| ENSG00000197562 | RAB40C     | 1.51E+00 | 2.26E-11 | 1.87E-10 |
| ENSG00000160439 | RDH13      | 1.88E+00 | 2.39E-11 | 1.97E-10 |
| ENSG00000178928 | TPRX1      | 5.94E+00 | 2.40E-11 | 1.98E-10 |
| ENSG00000132274 | TRIM22     | 3.11E+00 | 2.41E-11 | 1.99E-10 |
| ENSG00000198786 | MT-ND5     | 1.32E+00 | 2.42E-11 | 2.00E-10 |
| ENSG00000226812 | AL117382.1 | 5.52E+00 | 2.53E-11 | 2.08E-10 |
| ENSG00000234965 | SHISA8     | 2.39E+00 | 2.54E-11 | 2.09E-10 |
| ENSG00000104381 | GDAP1      | 1.52E+00 | 2.58E-11 | 2.13E-10 |
| ENSG00000163071 | SPATA18    | 5.87E+00 | 2.59E-11 | 2.13E-10 |
| ENSG00000187094 | CCK        | 5.92E+00 | 2.64E-11 | 2.17E-10 |
| ENSG00000130762 | ARHGEF16   | 2.23E+00 | 2.68E-11 | 2.20E-10 |
| ENSG00000136867 | SLC31A2    | 1.65E+00 | 2.71E-11 | 2.23E-10 |
| ENSG00000132879 | FBXO44     | 1.68E+00 | 2.73E-11 | 2.24E-10 |
| ENSG00000162444 | RBP7       | 2.70E+00 | 2.76E-11 | 2.27E-10 |
| ENSG00000107929 | LARP4B     | 1.25E+00 | 2.84E-11 | 2.33E-10 |
| ENSG00000261804 | AC007342.4 | 5.88E+00 | 2.90E-11 | 2.38E-10 |
| ENSG00000134574 | DDB2       | 1.39E+00 | 2.91E-11 | 2.38E-10 |
| ENSG00000125144 | MT1G       | 5.89E+00 | 2.91E-11 | 2.38E-10 |
| ENSG00000118898 | PPL        | 4.44E+00 | 2.98E-11 | 2.44E-10 |



|                 |            |          |          |          |
|-----------------|------------|----------|----------|----------|
| ENSG00000175984 | DENND2C    | 3.21E+00 | 3.00E-11 | 2.45E-10 |
| ENSG00000141458 | NPC1       | 1.13E+00 | 3.04E-11 | 2.48E-10 |
| ENSG00000250385 | AC106772.2 | 5.43E+00 | 3.05E-11 | 2.48E-10 |
| ENSG00000125779 | PANK2      | 1.08E+00 | 3.18E-11 | 2.59E-10 |
| ENSG00000140511 | HAPLN3     | 1.52E+00 | 3.18E-11 | 2.59E-10 |
| ENSG00000171446 | KRT27      | 5.88E+00 | 3.26E-11 | 2.65E-10 |
| ENSG00000101191 | DIDO1      | 1.08E+00 | 3.28E-11 | 2.66E-10 |
| ENSG00000130779 | CLIP1      | 1.17E+00 | 3.33E-11 | 2.71E-10 |
| ENSG00000188505 | NCCRP1     | 5.71E+00 | 3.40E-11 | 2.76E-10 |
| ENSG00000169896 | ITGAM      | 3.92E+00 | 3.44E-11 | 2.79E-10 |
| ENSG00000125772 | GPCPD1     | 1.06E+00 | 3.56E-11 | 2.89E-10 |
| ENSG00000198873 | GRK5       | 1.48E+00 | 3.69E-11 | 2.99E-10 |
| ENSG00000135842 | NIBAN1     | 3.35E+00 | 3.70E-11 | 2.99E-10 |
| ENSG00000286389 | AL731702.1 | 5.50E+00 | 3.71E-11 | 3.00E-10 |
| ENSG00000156232 | WHAMM      | 1.17E+00 | 3.91E-11 | 3.16E-10 |
| ENSG00000275880 | AL139385.1 | 5.11E+00 | 4.04E-11 | 3.26E-10 |
| ENSG00000108511 | HOXB6      | 1.49E+00 | 4.07E-11 | 3.28E-10 |
| ENSG00000196502 | SULT1A1    | 2.88E+00 | 4.45E-11 | 3.58E-10 |
| ENSG00000172292 | CERS6      | 1.22E+00 | 4.47E-11 | 3.59E-10 |
| ENSG00000149328 | GLB1L2     | 2.49E+00 | 4.55E-11 | 3.65E-10 |
| ENSG00000075785 | RAB7A      | 1.00E+00 | 4.64E-11 | 3.72E-10 |
| ENSG00000132740 | IGHMBP2    | 1.23E+00 | 4.66E-11 | 3.73E-10 |
| ENSG00000197177 | ADGRA1     | 5.70E+00 | 4.70E-11 | 3.77E-10 |
| ENSG00000101336 | HCK        | 5.15E+00 | 4.73E-11 | 3.79E-10 |
| ENSG00000197620 | CXorf40A   | 2.82E+00 | 4.78E-11 | 3.82E-10 |
| ENSG00000108256 | NUFIP2     | 1.11E+00 | 4.89E-11 | 3.91E-10 |
| ENSG00000065000 | AP3D1      | 1.16E+00 | 5.16E-11 | 4.12E-10 |
| ENSG00000183943 | PRKX       | 1.41E+00 | 5.26E-11 | 4.19E-10 |
| ENSG00000088808 | PPP1R13B   | 2.00E+00 | 5.38E-11 | 4.28E-10 |
| ENSG00000173083 | HPSE       | 2.72E+00 | 5.55E-11 | 4.41E-10 |
| ENSG00000135956 | TMEM127    | 1.06E+00 | 5.69E-11 | 4.52E-10 |
| ENSG00000115884 | SDC1       | 1.64E+00 | 5.95E-11 | 4.72E-10 |
| ENSG00000109586 | GALNT7     | 1.20E+00 | 6.19E-11 | 4.89E-10 |
| ENSG00000198780 | FAM169A    | 2.20E+00 | 6.20E-11 | 4.90E-10 |
| ENSG00000100290 | BIK        | 3.90E+00 | 6.28E-11 | 4.96E-10 |
| ENSG00000165474 | GJB2       | 4.27E+00 | 6.34E-11 | 5.00E-10 |
| ENSG00000092931 | MFSD11     | 1.12E+00 | 6.37E-11 | 5.02E-10 |
| ENSG00000060558 | GNA15      | 5.04E+00 | 6.39E-11 | 5.04E-10 |
| ENSG00000169877 | AHSP       | 6.06E+00 | 6.47E-11 | 5.10E-10 |
| ENSG00000160460 | SPTBN4     | 5.19E+00 | 6.48E-11 | 5.10E-10 |

|                 |            |          |          |          |
|-----------------|------------|----------|----------|----------|
| ENSG00000176994 | SMCR8      | 1.46E+00 | 6.54E-11 | 5.14E-10 |
| ENSG00000068650 | ATP11A     | 1.45E+00 | 6.68E-11 | 5.25E-10 |
| ENSG00000101276 | SLC52A3    | 5.77E+00 | 6.70E-11 | 5.26E-10 |
| ENSG00000144583 | MARCH4     | 3.33E+00 | 6.77E-11 | 5.32E-10 |
| ENSG00000105656 | ELL        | 1.61E+00 | 6.89E-11 | 5.40E-10 |
| ENSG00000143867 | OSR1       | 3.29E+00 | 7.55E-11 | 5.90E-10 |
| ENSG00000188770 | OPTC       | 5.64E+00 | 7.70E-11 | 6.01E-10 |
| ENSG00000090020 | SLC9A1     | 1.11E+00 | 8.01E-11 | 6.24E-10 |
| ENSG00000196734 | LCE1B      | 4.84E+00 | 8.06E-11 | 6.27E-10 |
| ENSG00000108523 | RNF167     | 1.29E+00 | 8.12E-11 | 6.32E-10 |
| ENSG00000140678 | ITGAX      | 4.00E+00 | 8.29E-11 | 6.44E-10 |
| ENSG00000023287 | RB1CC1     | 1.03E+00 | 8.43E-11 | 6.55E-10 |
| ENSG00000166289 | PLEKHF1    | 2.73E+00 | 8.43E-11 | 6.55E-10 |
| ENSG00000129450 | SIGLEC9    | 5.49E+00 | 8.47E-11 | 6.58E-10 |
| ENSG00000159658 | EFCAB14    | 1.07E+00 | 8.65E-11 | 6.71E-10 |
| ENSG00000157216 | SSBP3      | 1.07E+00 | 9.04E-11 | 7.01E-10 |
| ENSG00000160972 | PPP1R16A   | 1.20E+00 | 9.18E-11 | 7.11E-10 |
| ENSG00000130338 | TULP4      | 1.06E+00 | 9.35E-11 | 7.24E-10 |
| ENSG00000125966 | MMP24      | 2.91E+00 | 9.81E-11 | 7.59E-10 |
| ENSG00000154832 | CXXC1      | 1.34E+00 | 1.00E-10 | 7.73E-10 |
| ENSG00000128590 | DNAJB9     | 1.61E+00 | 1.06E-10 | 8.17E-10 |
| ENSG00000143858 | SYT2       | 5.78E+00 | 1.08E-10 | 8.30E-10 |
| ENSG00000100241 | SBF1       | 1.43E+00 | 1.09E-10 | 8.37E-10 |
| ENSG00000196730 | DAPK1      | 2.72E+00 | 1.09E-10 | 8.39E-10 |
| ENSG00000157985 | AGAP1      | 1.20E+00 | 1.12E-10 | 8.61E-10 |
| ENSG00000175938 | ORAI3      | 1.99E+00 | 1.13E-10 | 8.65E-10 |
| ENSG00000109065 | NAT9       | 1.23E+00 | 1.14E-10 | 8.71E-10 |
| ENSG00000104825 | NFKBIB     | 1.34E+00 | 1.16E-10 | 8.90E-10 |
| ENSG00000109756 | RAPGEF2    | 1.26E+00 | 1.16E-10 | 8.92E-10 |
| ENSG00000165244 | ZNF367     | 1.59E+00 | 1.27E-10 | 9.70E-10 |
| ENSG00000136928 | GABBR2     | 3.97E+00 | 1.36E-10 | 1.03E-09 |
| ENSG00000226332 | AL354836.1 | 3.03E+00 | 1.41E-10 | 1.07E-09 |
| ENSG00000135631 | RAB11FIP5  | 1.32E+00 | 1.42E-10 | 1.07E-09 |
| ENSG00000204428 | LY6G5C     | 4.36E+00 | 1.47E-10 | 1.11E-09 |
| ENSG00000214087 | ARL16      | 1.44E+00 | 1.47E-10 | 1.11E-09 |
| ENSG00000135423 | GLS2       | 2.30E+00 | 1.47E-10 | 1.12E-09 |
| ENSG00000141744 | PNMT       | 3.55E+00 | 1.48E-10 | 1.12E-09 |
| ENSG00000114737 | CISH       | 1.68E+00 | 1.50E-10 | 1.13E-09 |
| ENSG00000125657 | TNFSF9     | 1.89E+00 | 1.52E-10 | 1.14E-09 |
| ENSG00000110660 | SLC35F2    | 1.24E+00 | 1.53E-10 | 1.16E-09 |

|                 |           |          |          |          |
|-----------------|-----------|----------|----------|----------|
| ENSG00000145113 | MUC4      | 5.79E+00 | 1.57E-10 | 1.18E-09 |
| ENSG00000156475 | PPP2R2B   | 5.78E+00 | 1.60E-10 | 1.21E-09 |
| ENSG00000173702 | MUC13     | 5.82E+00 | 1.61E-10 | 1.21E-09 |
| ENSG00000119630 | PGF       | 1.09E+00 | 1.66E-10 | 1.25E-09 |
| ENSG00000128849 | CGNL1     | 2.79E+00 | 1.67E-10 | 1.26E-09 |
| ENSG00000139718 | SETD1B    | 1.44E+00 | 1.70E-10 | 1.28E-09 |
| ENSG00000196562 | SULF2     | 1.06E+00 | 1.70E-10 | 1.28E-09 |
| ENSG00000177303 | CASKIN2   | 1.44E+00 | 1.78E-10 | 1.33E-09 |
| ENSG00000090061 | CCNK      | 1.46E+00 | 1.79E-10 | 1.34E-09 |
| ENSG00000185522 | LMNTD2    | 4.55E+00 | 1.82E-10 | 1.36E-09 |
| ENSG00000143878 | RHOB      | 1.38E+00 | 1.84E-10 | 1.37E-09 |
| ENSG00000154040 | CABYR     | 2.05E+00 | 1.84E-10 | 1.38E-09 |
| ENSG00000156574 | NODAL     | 5.48E+00 | 1.87E-10 | 1.40E-09 |
| ENSG00000184584 | TMEM173   | 1.66E+00 | 1.96E-10 | 1.46E-09 |
| ENSG00000167065 | DUSP18    | 1.62E+00 | 1.97E-10 | 1.47E-09 |
| ENSG00000007384 | RHBDF1    | 1.96E+00 | 1.97E-10 | 1.47E-09 |
| ENSG00000177663 | IL17RA    | 1.24E+00 | 2.00E-10 | 1.49E-09 |
| ENSG00000100151 | PICK1     | 1.52E+00 | 2.02E-10 | 1.50E-09 |
| ENSG00000158220 | ESYT3     | 3.20E+00 | 2.15E-10 | 1.60E-09 |
| ENSG00000175315 | CST6      | 5.80E+00 | 2.19E-10 | 1.63E-09 |
| ENSG00000182175 | RGMA      | 4.02E+00 | 2.32E-10 | 1.72E-09 |
| ENSG00000166166 | TRMT61A   | 1.12E+00 | 2.34E-10 | 1.73E-09 |
| ENSG00000175048 | ZDHHC14   | 1.23E+00 | 2.35E-10 | 1.74E-09 |
| ENSG00000104237 | RP1       | 4.95E+00 | 2.37E-10 | 1.75E-09 |
| ENSG00000146826 | MAP11     | 1.99E+00 | 2.39E-10 | 1.77E-09 |
| ENSG00000105499 | PLA2G4C   | 2.83E+00 | 2.39E-10 | 1.77E-09 |
| ENSG00000177685 | CRACR2B   | 4.88E+00 | 2.44E-10 | 1.80E-09 |
| ENSG00000058085 | LAMC2     | 4.26E+00 | 2.46E-10 | 1.81E-09 |
| ENSG00000135090 | TAOK3     | 1.02E+00 | 2.47E-10 | 1.82E-09 |
| ENSG00000184811 | TRARG1    | 5.50E+00 | 2.47E-10 | 1.82E-09 |
| ENSG00000141741 | MIEN1     | 1.38E+00 | 2.61E-10 | 1.92E-09 |
| ENSG00000188916 | INSYN2A   | 4.00E+00 | 2.63E-10 | 1.93E-09 |
| ENSG00000039987 | BEST2     | 6.15E+00 | 2.66E-10 | 1.95E-09 |
| ENSG00000231826 | LINC01819 | 4.92E+00 | 2.66E-10 | 1.95E-09 |
| ENSG00000175105 | ZNF654    | 1.71E+00 | 2.75E-10 | 2.01E-09 |
| ENSG00000120875 | DUSP4     | 1.50E+00 | 2.76E-10 | 2.02E-09 |
| ENSG00000163513 | TGFBR2    | 1.06E+00 | 2.79E-10 | 2.04E-09 |
| ENSG00000092871 | RFFL      | 1.45E+00 | 2.84E-10 | 2.07E-09 |
| ENSG00000101842 | VSIG1     | 4.83E+00 | 2.86E-10 | 2.09E-09 |
| ENSG00000130479 | MAP1S     | 1.05E+00 | 2.89E-10 | 2.11E-09 |

|                 |            |          |          |          |
|-----------------|------------|----------|----------|----------|
| ENSG0000005882  | PDK2       | 1.50E+00 | 2.90E-10 | 2.11E-09 |
| ENSG00000197084 | LCE1C      | 5.21E+00 | 2.92E-10 | 2.12E-09 |
| ENSG00000124313 | IQSEC2     | 1.87E+00 | 3.09E-10 | 2.24E-09 |
| ENSG00000083223 | TUT7       | 1.36E+00 | 3.32E-10 | 2.40E-09 |
| ENSG00000138083 | SIX3       | 5.22E+00 | 3.36E-10 | 2.43E-09 |
| ENSG00000105855 | ITGB8      | 1.93E+00 | 3.42E-10 | 2.47E-09 |
| ENSG00000124171 | PARD6B     | 1.18E+00 | 3.43E-10 | 2.48E-09 |
| ENSG00000167562 | ZNF701     | 1.77E+00 | 3.52E-10 | 2.55E-09 |
| ENSG00000116977 | LGALS8     | 1.45E+00 | 3.55E-10 | 2.56E-09 |
| ENSG00000104413 | ESRP1      | 3.62E+00 | 3.59E-10 | 2.59E-09 |
| ENSG00000118495 | PLAGL1     | 1.28E+00 | 3.60E-10 | 2.59E-09 |
| ENSG00000204282 | TNRC6C-AS1 | 4.92E+00 | 3.62E-10 | 2.61E-09 |
| ENSG00000100109 | TFIP11     | 1.12E+00 | 3.73E-10 | 2.68E-09 |
| ENSG00000117308 | GALE       | 1.68E+00 | 3.82E-10 | 2.74E-09 |
| ENSG00000198125 | MB         | 4.43E+00 | 4.03E-10 | 2.90E-09 |
| ENSG00000100077 | GRK3       | 1.59E+00 | 4.14E-10 | 2.97E-09 |
| ENSG00000187024 | PTRH1      | 1.62E+00 | 4.29E-10 | 3.07E-09 |
| ENSG00000137478 | FCHSD2     | 1.33E+00 | 4.45E-10 | 3.19E-09 |
| ENSG00000147509 | RGS20      | 1.77E+00 | 4.46E-10 | 3.19E-09 |
| ENSG00000171223 | JUNB       | 1.06E+00 | 4.54E-10 | 3.24E-09 |
| ENSG00000099822 | HCN2       | 2.05E+00 | 4.71E-10 | 3.36E-09 |
| ENSG00000189077 | TMEM120A   | 1.89E+00 | 4.83E-10 | 3.45E-09 |
| ENSG00000168477 | TNXB       | 5.83E+00 | 4.87E-10 | 3.47E-09 |
| ENSG00000066629 | EML1       | 4.96E+00 | 5.04E-10 | 3.59E-09 |
| ENSG00000118160 | SLC8A2     | 4.60E+00 | 5.14E-10 | 3.66E-09 |
| ENSG00000197081 | IGF2R      | 1.09E+00 | 5.28E-10 | 3.76E-09 |
| ENSG00000138942 | RNF185     | 1.57E+00 | 5.32E-10 | 3.78E-09 |
| ENSG00000244734 | HBB        | 5.81E+00 | 5.58E-10 | 3.96E-09 |
| ENSG00000121316 | PLBD1      | 3.43E+00 | 5.84E-10 | 4.14E-09 |
| ENSG00000123243 | ITIH5      | 4.94E+00 | 5.89E-10 | 4.17E-09 |
| ENSG00000120549 | KIAA1217   | 2.08E+00 | 5.92E-10 | 4.19E-09 |
| ENSG00000266074 | BAHCC1     | 1.77E+00 | 5.99E-10 | 4.24E-09 |
| ENSG00000160703 | NLRX1      | 1.79E+00 | 6.03E-10 | 4.26E-09 |
| ENSG00000138674 | SEC31A     | 1.04E+00 | 6.12E-10 | 4.32E-09 |
| ENSG00000132517 | SLC52A1    | 3.27E+00 | 6.18E-10 | 4.36E-09 |
| ENSG00000124126 | PREX1      | 1.75E+00 | 6.26E-10 | 4.41E-09 |
| ENSG00000164081 | TEX264     | 1.58E+00 | 6.37E-10 | 4.49E-09 |
| ENSG00000166167 | BTRC       | 1.48E+00 | 6.51E-10 | 4.59E-09 |
| ENSG00000174562 | KLK15      | 5.85E+00 | 6.53E-10 | 4.60E-09 |
| ENSG00000173706 | HEG1       | 1.17E+00 | 6.76E-10 | 4.76E-09 |

|                 |            |          |          |          |
|-----------------|------------|----------|----------|----------|
| ENSG00000068078 | FGFR3      | 1.30E+00 | 6.78E-10 | 4.77E-09 |
| ENSG00000197558 | SSPO       | 4.06E+00 | 6.90E-10 | 4.85E-09 |
| ENSG00000267440 | LINC02594  | 5.98E+00 | 6.93E-10 | 4.87E-09 |
| ENSG00000160741 | CRTC2      | 1.04E+00 | 7.43E-10 | 5.21E-09 |
| ENSG00000213676 | ATF6B      | 2.45E+00 | 7.64E-10 | 5.35E-09 |
| ENSG00000072134 | EPN2       | 1.58E+00 | 7.97E-10 | 5.58E-09 |
| ENSG00000015592 | STMN4      | 5.07E+00 | 8.32E-10 | 5.82E-09 |
| ENSG00000134996 | OSTF1      | 1.34E+00 | 8.42E-10 | 5.88E-09 |
| ENSG00000086548 | CEACAM6    | 6.03E+00 | 9.15E-10 | 6.38E-09 |
| ENSG00000137936 | BCAR3      | 1.77E+00 | 9.16E-10 | 6.38E-09 |
| ENSG00000137857 | DUOX1      | 4.24E+00 | 9.24E-10 | 6.43E-09 |
| ENSG00000169221 | TBC1D10B   | 1.00E+00 | 9.72E-10 | 6.75E-09 |
| ENSG00000197329 | PELI1      | 2.29E+00 | 9.73E-10 | 6.75E-09 |
| ENSG00000170802 | FOXN2      | 1.25E+00 | 9.79E-10 | 6.79E-09 |
| ENSG00000203499 | IQANK1     | 4.72E+00 | 1.01E-09 | 6.99E-09 |
| ENSG00000158955 | WNT9B      | 5.57E+00 | 1.01E-09 | 7.03E-09 |
| ENSG00000109472 | CPE        | 1.04E+00 | 1.02E-09 | 7.04E-09 |
| ENSG00000215788 | TNFRSF25   | 2.51E+00 | 1.04E-09 | 7.17E-09 |
| ENSG00000263343 | AC009088.4 | 1.81E+00 | 1.05E-09 | 7.27E-09 |
| ENSG00000104081 | BMF        | 2.31E+00 | 1.06E-09 | 7.34E-09 |
| ENSG00000166689 | PLEKHA7    | 5.02E+00 | 1.08E-09 | 7.49E-09 |
| ENSG00000156675 | RAB11FIP1  | 1.14E+00 | 1.12E-09 | 7.75E-09 |
| ENSG00000174788 | PCP2       | 5.16E+00 | 1.14E-09 | 7.85E-09 |
| ENSG00000089902 | RCOR1      | 1.31E+00 | 1.17E-09 | 8.08E-09 |
| ENSG00000181378 | CFAP65     | 5.40E+00 | 1.21E-09 | 8.30E-09 |
| ENSG00000164331 | ANKRA2     | 1.32E+00 | 1.21E-09 | 8.32E-09 |
| ENSG00000040608 | RTN4R      | 1.78E+00 | 1.25E-09 | 8.57E-09 |
| ENSG00000256982 | AC135782.1 | 3.28E+00 | 1.25E-09 | 8.58E-09 |
| ENSG00000150403 | TMCO3      | 1.11E+00 | 1.27E-09 | 8.68E-09 |
| ENSG00000143061 | IGSF3      | 1.89E+00 | 1.29E-09 | 8.85E-09 |
| ENSG00000116667 | C1orf21    | 2.40E+00 | 1.30E-09 | 8.87E-09 |
| ENSG00000047346 | FAM214A    | 2.01E+00 | 1.31E-09 | 8.94E-09 |
| ENSG00000131634 | TMEM204    | 5.26E+00 | 1.33E-09 | 9.10E-09 |
| ENSG00000150782 | IL18       | 4.05E+00 | 1.35E-09 | 9.23E-09 |
| ENSG00000112659 | CUL9       | 1.83E+00 | 1.36E-09 | 9.27E-09 |
| ENSG00000159082 | SYNJ1      | 1.31E+00 | 1.40E-09 | 9.55E-09 |
| ENSG00000256087 | ZNF432     | 1.59E+00 | 1.41E-09 | 9.58E-09 |
| ENSG00000170075 | GPR37L1    | 5.28E+00 | 1.42E-09 | 9.63E-09 |
| ENSG00000277363 | SRCIN1     | 2.52E+00 | 1.42E-09 | 9.63E-09 |
| ENSG00000105085 | MED26      | 1.04E+00 | 1.45E-09 | 9.87E-09 |

|                 |            |          |          |          |
|-----------------|------------|----------|----------|----------|
| ENSG00000136378 | ADAMTS7    | 2.16E+00 | 1.46E-09 | 9.92E-09 |
| ENSG00000234949 | AC104667.2 | 5.80E+00 | 1.49E-09 | 1.01E-08 |
| ENSG00000074211 | PPP2R2C    | 3.85E+00 | 1.49E-09 | 1.01E-08 |
| ENSG00000197530 | MIB2       | 1.45E+00 | 1.50E-09 | 1.01E-08 |
| ENSG00000184985 | SORCS2     | 3.38E+00 | 1.52E-09 | 1.03E-08 |
| ENSG00000182022 | CHST15     | 2.31E+00 | 1.57E-09 | 1.06E-08 |
| ENSG00000175920 | DOK7       | 5.32E+00 | 1.59E-09 | 1.08E-08 |
| ENSG00000135116 | HRK        | 4.40E+00 | 1.61E-09 | 1.08E-08 |
| ENSG00000107147 | KCNT1      | 4.81E+00 | 1.66E-09 | 1.12E-08 |
| ENSG00000149480 | MTA2       | 1.11E+00 | 1.77E-09 | 1.19E-08 |
| ENSG00000188211 | NCR3LG1    | 2.73E+00 | 1.77E-09 | 1.19E-08 |
| ENSG00000166170 | BAG5       | 1.48E+00 | 1.81E-09 | 1.21E-08 |
| ENSG00000081913 | PHLPP1     | 1.40E+00 | 1.81E-09 | 1.22E-08 |
| ENSG00000183196 | CHST6      | 1.85E+00 | 1.82E-09 | 1.22E-08 |
| ENSG00000070882 | OSBPL3     | 2.04E+00 | 1.85E-09 | 1.24E-08 |
| ENSG00000143669 | LYST       | 1.47E+00 | 1.88E-09 | 1.26E-08 |
| ENSG00000113504 | SLC12A7    | 1.67E+00 | 1.91E-09 | 1.28E-08 |
| ENSG00000126062 | TMEM115    | 1.08E+00 | 1.91E-09 | 1.28E-08 |
| ENSG00000014164 | ZC3H3      | 1.46E+00 | 1.92E-09 | 1.28E-08 |
| ENSG00000122490 | SLC66A2    | 1.13E+00 | 2.01E-09 | 1.34E-08 |
| ENSG00000117114 | ADGRL2     | 2.55E+00 | 2.07E-09 | 1.38E-08 |
| ENSG00000178038 | ALS2CL     | 2.89E+00 | 2.07E-09 | 1.38E-08 |
| ENSG00000119986 | AVPI1      | 1.88E+00 | 2.10E-09 | 1.40E-08 |
| ENSG00000164181 | ELOVL7     | 2.17E+00 | 2.11E-09 | 1.40E-08 |
| ENSG00000244300 | GATA2-AS1  | 2.02E+00 | 2.15E-09 | 1.43E-08 |
| ENSG00000221866 | PLXNA4     | 6.05E+00 | 2.16E-09 | 1.44E-08 |
| ENSG00000167105 | TMEM92     | 4.84E+00 | 2.28E-09 | 1.51E-08 |
| ENSG00000171056 | SOX7       | 2.49E+00 | 2.33E-09 | 1.55E-08 |
| ENSG00000131969 | ABHD12B    | 5.47E+00 | 2.39E-09 | 1.59E-08 |
| ENSG00000213889 | PPM1N      | 2.03E+00 | 2.46E-09 | 1.63E-08 |
| ENSG00000125266 | EFNB2      | 1.15E+00 | 2.54E-09 | 1.68E-08 |
| ENSG00000164543 | STK17A     | 1.05E+00 | 2.58E-09 | 1.70E-08 |
| ENSG00000162551 | ALPL       | 5.24E+00 | 2.59E-09 | 1.71E-08 |
| ENSG00000159640 | ACE        | 5.21E+00 | 2.63E-09 | 1.74E-08 |
| ENSG00000163623 | NKX6-1     | 5.21E+00 | 2.64E-09 | 1.74E-08 |
| ENSG00000115266 | APC2       | 2.90E+00 | 2.66E-09 | 1.75E-08 |
| ENSG00000165757 | JCAD       | 1.92E+00 | 2.67E-09 | 1.76E-08 |
| ENSG00000166147 | FBN1       | 1.14E+00 | 2.76E-09 | 1.82E-08 |
| ENSG00000104361 | NIPAL2     | 2.67E+00 | 2.82E-09 | 1.85E-08 |
| ENSG00000101280 | ANGPT4     | 5.21E+00 | 2.88E-09 | 1.90E-08 |

|                 |        |          |          |          |
|-----------------|--------|----------|----------|----------|
| ENSG00000137265 | IRF4   | 5.45E+00 | 2.89E-09 | 1.90E-08 |
| ENSG00000131711 | MAP1B  | 1.07E+00 | 2.94E-09 | 1.93E-08 |
| ENSG00000134070 | IRAK2  | 1.35E+00 | 2.98E-09 | 1.96E-08 |
| ENSG00000144230 | GPR17  | 5.28E+00 | 2.98E-09 | 1.96E-08 |
| ENSG00000160072 | ATAD3B | 1.21E+00 | 2.99E-09 | 1.96E-08 |
| ENSG00000204060 | FOXO6  | 2.87E+00 | 3.04E-09 | 1.99E-08 |
| ENSG00000220201 | ZGLP1  | 1.88E+00 | 3.22E-09 | 2.11E-08 |
| ENSG00000101665 | SMAD7  | 1.43E+00 | 3.32E-09 | 2.16E-08 |
| ENSG00000185559 | DLK1   | 5.92E+00 | 3.55E-09 | 2.32E-08 |
| ENSG00000149091 | DGKZ   | 1.02E+00 | 3.56E-09 | 2.32E-08 |
| ENSG00000105088 | OLFM2  | 3.02E+00 | 3.67E-09 | 2.39E-08 |
| ENSG00000173156 | RHOD   | 3.07E+00 | 3.78E-09 | 2.46E-08 |
| ENSG00000147459 | DOCK5  | 1.18E+00 | 3.81E-09 | 2.48E-08 |
| ENSG00000101181 | MTG2   | 1.07E+00 | 3.85E-09 | 2.50E-08 |
| ENSG00000124212 | PTGIS  | 3.59E+00 | 3.88E-09 | 2.52E-08 |
| ENSG00000105467 | SYNGR4 | 6.24E+00 | 3.94E-09 | 2.55E-08 |
| ENSG00000130598 | TNNI2  | 5.85E+00 | 3.95E-09 | 2.56E-08 |
| ENSG00000121905 | HPCA   | 4.06E+00 | 4.12E-09 | 2.67E-08 |
| ENSG00000224940 | PRRT4  | 3.27E+00 | 4.13E-09 | 2.68E-08 |
| ENSG00000260428 | SCX    | 3.35E+00 | 4.14E-09 | 2.68E-08 |
| ENSG00000119888 | EPCAM  | 4.31E+00 | 4.14E-09 | 2.68E-08 |
| ENSG00000167861 | HID1   | 3.86E+00 | 4.14E-09 | 2.68E-08 |
| ENSG00000166897 | ELFN2  | 2.52E+00 | 4.17E-09 | 2.69E-08 |
| ENSG00000204673 | AKT1S1 | 1.24E+00 | 4.17E-09 | 2.69E-08 |
| ENSG00000111961 | SASH1  | 1.49E+00 | 4.19E-09 | 2.70E-08 |
| ENSG00000105369 | CD79A  | 4.14E+00 | 4.22E-09 | 2.72E-08 |
| ENSG00000180979 | LRRC57 | 1.33E+00 | 4.35E-09 | 2.80E-08 |
| ENSG00000204516 | MICB   | 1.29E+00 | 4.36E-09 | 2.81E-08 |
| ENSG00000128917 | DLL4   | 3.26E+00 | 4.38E-09 | 2.82E-08 |
| ENSG00000163220 | S100A9 | 4.72E+00 | 4.59E-09 | 2.95E-08 |
| ENSG00000161381 | PLXDC1 | 3.84E+00 | 4.76E-09 | 3.05E-08 |
| ENSG00000165097 | KDM1B  | 1.88E+00 | 4.76E-09 | 3.06E-08 |
| ENSG00000205978 | NYNRIN | 2.96E+00 | 4.78E-09 | 3.06E-08 |
| ENSG00000183421 | RIPK4  | 1.99E+00 | 4.87E-09 | 3.12E-08 |
| ENSG00000087303 | NID2   | 1.28E+00 | 4.95E-09 | 3.17E-08 |
| ENSG00000183049 | CAMK1D | 1.62E+00 | 5.35E-09 | 3.42E-08 |
| ENSG00000232956 | SNHG15 | 1.32E+00 | 5.37E-09 | 3.43E-08 |
| ENSG00000136044 | APPL2  | 1.19E+00 | 5.46E-09 | 3.49E-08 |
| ENSG00000100439 | ABHD4  | 1.15E+00 | 5.52E-09 | 3.52E-08 |
| ENSG00000250337 | PURPL  | 3.16E+00 | 5.64E-09 | 3.60E-08 |

|                 |            |          |          |          |
|-----------------|------------|----------|----------|----------|
| ENSG00000123159 | GIPC1      | 1.25E+00 | 5.71E-09 | 3.64E-08 |
| ENSG00000198538 | ZNF28      | 1.73E+00 | 5.73E-09 | 3.65E-08 |
| ENSG00000147799 | ARHGAP39   | 1.58E+00 | 5.75E-09 | 3.66E-08 |
| ENSG00000116035 | VAX2       | 3.82E+00 | 6.20E-09 | 3.94E-08 |
| ENSG00000107175 | CREB3      | 1.15E+00 | 6.21E-09 | 3.95E-08 |
| ENSG00000116514 | RNF19B     | 1.14E+00 | 6.29E-09 | 3.99E-08 |
| ENSG00000085831 | TTC39A     | 4.16E+00 | 6.33E-09 | 4.02E-08 |
| ENSG00000159023 | EPB41      | 1.28E+00 | 6.40E-09 | 4.06E-08 |
| ENSG00000124920 | MYRF       | 1.87E+00 | 6.40E-09 | 4.06E-08 |
| ENSG00000178078 | STAP2      | 2.26E+00 | 6.48E-09 | 4.10E-08 |
| ENSG00000062524 | LTK        | 4.28E+00 | 6.53E-09 | 4.13E-08 |
| ENSG00000214655 | ZSWIM8     | 1.10E+00 | 6.63E-09 | 4.19E-08 |
| ENSG00000007516 | BAIAP3     | 2.17E+00 | 6.73E-09 | 4.25E-08 |
| ENSG00000006283 | CACNA1G    | 2.73E+00 | 6.85E-09 | 4.33E-08 |
| ENSG00000164168 | TMEM184C   | 1.12E+00 | 7.23E-09 | 4.56E-08 |
| ENSG00000187244 | BCAM       | 1.46E+00 | 7.39E-09 | 4.66E-08 |
| ENSG00000104808 | DHDH       | 2.97E+00 | 7.47E-09 | 4.70E-08 |
| ENSG00000204577 | LILRB3     | 5.14E+00 | 7.70E-09 | 4.85E-08 |
| ENSG00000159224 | GIP        | 3.43E+00 | 8.03E-09 | 5.05E-08 |
| ENSG00000091536 | MYO15A     | 5.17E+00 | 8.04E-09 | 5.05E-08 |
| ENSG00000148798 | INA        | 2.02E+00 | 8.26E-09 | 5.18E-08 |
| ENSG00000174939 | ASPHD1     | 1.56E+00 | 8.34E-09 | 5.23E-08 |
| ENSG00000121350 | PYROXD1    | 1.39E+00 | 8.43E-09 | 5.28E-08 |
| ENSG00000267458 | AC092069.1 | 1.04E+01 | 8.68E-09 | 5.43E-08 |
| ENSG00000132906 | CASP9      | 2.02E+00 | 8.85E-09 | 5.53E-08 |
| ENSG00000099785 | MARCH2     | 2.06E+00 | 8.89E-09 | 5.56E-08 |
| ENSG00000100285 | NEFH       | 6.09E+00 | 9.39E-09 | 5.86E-08 |
| ENSG00000111860 | CEP85L     | 1.04E+00 | 9.81E-09 | 6.11E-08 |
| ENSG00000072832 | CRMP1      | 1.96E+00 | 9.89E-09 | 6.15E-08 |
| ENSG00000126583 | PRKCG      | 4.77E+00 | 9.90E-09 | 6.16E-08 |
| ENSG00000088726 | TMEM40     | 3.01E+00 | 1.00E-08 | 6.21E-08 |
| ENSG00000125845 | BMP2       | 5.27E+00 | 1.01E-08 | 6.30E-08 |
| ENSG00000170577 | SIX2       | 1.45E+00 | 1.03E-08 | 6.38E-08 |
| ENSG00000197506 | SLC28A3    | 5.37E+00 | 1.04E-08 | 6.45E-08 |
| ENSG00000104689 | TNFRSF10A  | 1.32E+00 | 1.04E-08 | 6.45E-08 |
| ENSG00000139044 | B4GALNT3   | 2.75E+00 | 1.05E-08 | 6.49E-08 |
| ENSG00000104866 | PPP1R37    | 1.40E+00 | 1.05E-08 | 6.53E-08 |
| ENSG00000187775 | DNAH17     | 4.61E+00 | 1.06E-08 | 6.57E-08 |
| ENSG00000172201 | ID4        | 4.51E+00 | 1.09E-08 | 6.73E-08 |
| ENSG00000158186 | MRAS       | 1.35E+00 | 1.09E-08 | 6.75E-08 |



|                 |            |          |          |          |
|-----------------|------------|----------|----------|----------|
| ENSG00000126432 | PRDX5      | 1.49E+00 | 1.10E-08 | 6.79E-08 |
| ENSG00000085117 | CD82       | 1.06E+00 | 1.11E-08 | 6.83E-08 |
| ENSG00000250934 | AC016924.1 | 4.92E+00 | 1.11E-08 | 6.84E-08 |
| ENSG00000145920 | CPLX2      | 5.71E+00 | 1.12E-08 | 6.90E-08 |
| ENSG00000223729 | LINC02247  | 5.20E+00 | 1.13E-08 | 6.97E-08 |
| ENSG00000172061 | LRRC15     | 4.46E+00 | 1.19E-08 | 7.34E-08 |
| ENSG00000109929 | SC5D       | 1.11E+00 | 1.21E-08 | 7.48E-08 |
| ENSG00000170776 | AKAP13     | 1.04E+00 | 1.23E-08 | 7.54E-08 |
| ENSG00000176842 | IRX5       | 2.27E+00 | 1.26E-08 | 7.72E-08 |
| ENSG00000179388 | EGR3       | 2.21E+00 | 1.26E-08 | 7.74E-08 |
| ENSG00000103534 | TMC5       | 5.59E+00 | 1.27E-08 | 7.77E-08 |
| ENSG00000105696 | TMEM59L    | 2.95E+00 | 1.27E-08 | 7.79E-08 |
| ENSG00000044012 | GUCA2B     | 5.71E+00 | 1.30E-08 | 7.94E-08 |
| ENSG00000107821 | KAZALD1    | 1.99E+00 | 1.35E-08 | 8.28E-08 |
| ENSG00000049323 | LTBP1      | 2.13E+00 | 1.37E-08 | 8.38E-08 |
| ENSG00000119681 | LTBP2      | 1.36E+00 | 1.39E-08 | 8.47E-08 |
| ENSG00000170426 | SDR9C7     | 5.18E+00 | 1.40E-08 | 8.52E-08 |
| ENSG00000101230 | ISM1       | 4.91E+00 | 1.40E-08 | 8.55E-08 |
| ENSG00000125637 | PSD4       | 3.12E+00 | 1.43E-08 | 8.74E-08 |
| ENSG00000157625 | TAB3       | 1.30E+00 | 1.46E-08 | 8.91E-08 |
| ENSG00000144655 | CSRNP1     | 1.17E+00 | 1.47E-08 | 8.93E-08 |
| ENSG00000137491 | SLCO2B1    | 5.71E+00 | 1.50E-08 | 9.12E-08 |
| ENSG00000188760 | TMEM198    | 2.77E+00 | 1.53E-08 | 9.27E-08 |
| ENSG00000125998 | FAM83C     | 5.43E+00 | 1.56E-08 | 9.50E-08 |
| ENSG00000148925 | BTBD10     | 1.17E+00 | 1.57E-08 | 9.50E-08 |
| ENSG00000118971 | CCND2      | 5.04E+00 | 1.58E-08 | 9.56E-08 |
| ENSG00000170369 | CST2       | 5.39E+00 | 1.58E-08 | 9.61E-08 |
| ENSG00000180098 | TRNAU1AP   | 1.08E+00 | 1.60E-08 | 9.72E-08 |
| ENSG00000105248 | YJU2       | 1.22E+00 | 1.61E-08 | 9.75E-08 |
| ENSG00000197696 | NMB        | 1.54E+00 | 1.63E-08 | 9.84E-08 |
| ENSG00000169696 | ASPSCR1    | 1.41E+00 | 1.65E-08 | 1.00E-07 |
| ENSG00000102349 | KLF8       | 5.47E+00 | 1.70E-08 | 1.03E-07 |
| ENSG00000099814 | CEP170B    | 1.62E+00 | 1.72E-08 | 1.04E-07 |
| ENSG00000266094 | RASSF5     | 2.68E+00 | 1.74E-08 | 1.05E-07 |
| ENSG00000105339 | DENND3     | 3.90E+00 | 1.84E-08 | 1.11E-07 |
| ENSG00000174600 | CMKLR1     | 4.00E+00 | 1.85E-08 | 1.12E-07 |
| ENSG00000072954 | TMEM38A    | 2.39E+00 | 1.86E-08 | 1.12E-07 |
| ENSG00000186648 | CARMIL3    | 3.70E+00 | 1.88E-08 | 1.13E-07 |
| ENSG00000087085 | ACHE       | 4.32E+00 | 1.93E-08 | 1.16E-07 |
| ENSG00000078687 | TNRC6C     | 1.18E+00 | 1.96E-08 | 1.18E-07 |

|                 |            |          |          |          |
|-----------------|------------|----------|----------|----------|
| ENSG00000261143 | ADAMTS7P3  | 5.28E+00 | 1.98E-08 | 1.19E-07 |
| ENSG00000005102 | MEOX1      | 5.22E+00 | 2.05E-08 | 1.23E-07 |
| ENSG00000198133 | TMEM229B   | 3.47E+00 | 2.06E-08 | 1.23E-07 |
| ENSG00000146083 | RNF44      | 1.35E+00 | 2.07E-08 | 1.24E-07 |
| ENSG00000086544 | ITPKC      | 1.45E+00 | 2.07E-08 | 1.24E-07 |
| ENSG00000175213 | ZNF408     | 1.31E+00 | 2.09E-08 | 1.25E-07 |
| ENSG00000099994 | SUSD2      | 3.86E+00 | 2.14E-08 | 1.28E-07 |
| ENSG00000110203 | FOLR3      | 5.59E+00 | 2.18E-08 | 1.30E-07 |
| ENSG00000125734 | GPR108     | 1.06E+00 | 2.18E-08 | 1.30E-07 |
| ENSG00000115183 | TANC1      | 1.04E+00 | 2.20E-08 | 1.31E-07 |
| ENSG00000168917 | SLC35G2    | 1.34E+00 | 2.22E-08 | 1.32E-07 |
| ENSG00000255501 | CARD18     | 5.12E+00 | 2.26E-08 | 1.34E-07 |
| ENSG00000196431 | CRYBA4     | 5.99E+00 | 2.27E-08 | 1.35E-07 |
| ENSG00000131096 | PYY        | 5.47E+00 | 2.36E-08 | 1.40E-07 |
| ENSG00000130475 | FCHO1      | 2.62E+00 | 2.41E-08 | 1.43E-07 |
| ENSG00000169733 | RFNG       | 1.12E+00 | 2.42E-08 | 1.43E-07 |
| ENSG00000168754 | FAM178B    | 5.05E+00 | 2.45E-08 | 1.45E-07 |
| ENSG00000186994 | KANK3      | 2.86E+00 | 2.49E-08 | 1.47E-07 |
| ENSG00000261600 | AC233266.2 | 4.05E+00 | 2.58E-08 | 1.52E-07 |
| ENSG00000136002 | ARHGEF4    | 1.80E+00 | 2.59E-08 | 1.53E-07 |
| ENSG00000131018 | SYNE1      | 1.39E+00 | 2.67E-08 | 1.58E-07 |
| ENSG00000197021 | CXorf40B   | 1.44E+00 | 2.67E-08 | 1.58E-07 |
| ENSG00000275437 | AL121832.3 | 3.42E+00 | 2.71E-08 | 1.60E-07 |
| ENSG00000167889 | MGAT5B     | 1.91E+00 | 2.77E-08 | 1.63E-07 |
| ENSG00000144048 | DUSP11     | 1.06E+00 | 2.80E-08 | 1.64E-07 |
| ENSG00000165359 | INTS6L     | 4.39E+00 | 2.81E-08 | 1.65E-07 |
| ENSG00000214176 | PLEKHM1P1  | 2.53E+00 | 2.82E-08 | 1.65E-07 |
| ENSG00000069020 | MAST4      | 2.17E+00 | 2.85E-08 | 1.67E-07 |
| ENSG00000179111 | HES7       | 2.52E+00 | 2.90E-08 | 1.69E-07 |
| ENSG00000183979 | NPB        | 3.95E+00 | 2.94E-08 | 1.72E-07 |
| ENSG00000133805 | AMPD3      | 2.39E+00 | 2.98E-08 | 1.74E-07 |
| ENSG00000185798 | WDR53      | 1.34E+00 | 2.98E-08 | 1.74E-07 |
| ENSG00000163788 | SNRK       | 1.49E+00 | 3.03E-08 | 1.77E-07 |
| ENSG00000177380 | PPFIA3     | 1.52E+00 | 3.10E-08 | 1.81E-07 |
| ENSG00000272275 | AC092687.3 | 3.26E+00 | 3.10E-08 | 1.81E-07 |
| ENSG00000164520 | RAET1E     | 5.53E+00 | 3.14E-08 | 1.83E-07 |
| ENSG00000162511 | LAPTM5     | 3.19E+00 | 3.14E-08 | 1.83E-07 |
| ENSG00000133056 | PIK3C2B    | 1.76E+00 | 3.29E-08 | 1.91E-07 |
| ENSG00000162510 | MATN1      | 5.12E+00 | 3.35E-08 | 1.95E-07 |
| ENSG00000213918 | DNASE1     | 1.31E+00 | 3.35E-08 | 1.95E-07 |

|                 |            |          |          |          |
|-----------------|------------|----------|----------|----------|
| ENSG00000172458 | IL17D      | 3.10E+00 | 3.41E-08 | 1.98E-07 |
| ENSG00000008300 | CELSR3     | 2.37E+00 | 3.41E-08 | 1.98E-07 |
| ENSG00000229723 | LINC01054  | 5.06E+00 | 3.41E-08 | 1.98E-07 |
| ENSG00000120278 | PLEKHG1    | 3.10E+00 | 3.53E-08 | 2.04E-07 |
| ENSG00000283294 | AP005212.4 | 2.76E+00 | 3.72E-08 | 2.15E-07 |
| ENSG00000160471 | COX6B2     | 3.87E+00 | 3.75E-08 | 2.17E-07 |
| ENSG00000159579 | RSPRY1     | 1.01E+00 | 3.81E-08 | 2.20E-07 |
| ENSG00000136286 | MYO1G      | 4.84E+00 | 3.91E-08 | 2.25E-07 |
| ENSG00000256229 | ZNF486     | 1.33E+00 | 3.96E-08 | 2.28E-07 |
| ENSG00000171606 | ZNF274     | 1.06E+00 | 4.13E-08 | 2.37E-07 |
| ENSG00000260196 | AC124798.1 | 2.81E+00 | 4.15E-08 | 2.39E-07 |
| ENSG00000141682 | PMAIP1     | 1.03E+00 | 4.27E-08 | 2.45E-07 |
| ENSG00000003137 | CYP26B1    | 2.29E+00 | 4.37E-08 | 2.51E-07 |
| ENSG00000068903 | SIRT2      | 1.03E+00 | 4.38E-08 | 2.51E-07 |
| ENSG00000055163 | CYFIP2     | 1.88E+00 | 4.49E-08 | 2.57E-07 |
| ENSG00000145349 | CAMK2D     | 1.49E+00 | 4.53E-08 | 2.59E-07 |
| ENSG00000182919 | C11orf54   | 1.41E+00 | 4.53E-08 | 2.59E-07 |
| ENSG00000159339 | PADI4      | 4.24E+00 | 4.55E-08 | 2.61E-07 |
| ENSG00000132000 | PODNL1     | 1.77E+00 | 4.62E-08 | 2.64E-07 |
| ENSG00000149451 | ADAM33     | 4.42E+00 | 4.62E-08 | 2.64E-07 |
| ENSG00000258616 | LINC02303  | 4.69E+00 | 4.66E-08 | 2.66E-07 |
| ENSG00000227234 | SPANXB1    | 5.13E+00 | 4.82E-08 | 2.75E-07 |
| ENSG00000137171 | KLC4       | 1.21E+00 | 5.07E-08 | 2.89E-07 |
| ENSG00000076201 | PTPN23     | 1.41E+00 | 5.16E-08 | 2.94E-07 |
| ENSG00000160224 | AIRE       | 5.77E+00 | 5.17E-08 | 2.94E-07 |
| ENSG00000197302 | ZNF720     | 1.21E+00 | 5.22E-08 | 2.97E-07 |
| ENSG00000198715 | GLMP       | 1.15E+00 | 5.22E-08 | 2.97E-07 |
| ENSG00000005001 | PRSS22     | 5.19E+00 | 5.28E-08 | 3.00E-07 |
| ENSG00000130559 | CAMSAP1    | 1.16E+00 | 5.34E-08 | 3.03E-07 |
| ENSG00000173175 | ADCY5      | 4.64E+00 | 5.35E-08 | 3.04E-07 |
| ENSG00000211584 | SLC48A1    | 2.07E+00 | 5.57E-08 | 3.16E-07 |
| ENSG00000136848 | DAB2IP     | 1.12E+00 | 5.60E-08 | 3.17E-07 |
| ENSG00000006606 | CCL26      | 3.03E+00 | 5.77E-08 | 3.26E-07 |
| ENSG00000141738 | GRB7       | 4.62E+00 | 5.84E-08 | 3.30E-07 |
| ENSG00000153815 | CMIP       | 1.02E+00 | 5.95E-08 | 3.36E-07 |
| ENSG00000140090 | SLC24A4    | 5.17E+00 | 6.03E-08 | 3.40E-07 |
| ENSG00000158062 | UBXN11     | 1.03E+00 | 6.06E-08 | 3.42E-07 |
| ENSG00000151892 | GFRA1      | 1.52E+00 | 6.07E-08 | 3.42E-07 |
| ENSG00000123146 | ADGRE5     | 1.02E+00 | 6.24E-08 | 3.51E-07 |
| ENSG00000116668 | SWT1       | 2.17E+00 | 6.30E-08 | 3.54E-07 |

|                 |            |          |          |          |
|-----------------|------------|----------|----------|----------|
| ENSG00000135925 | WNT10A     | 4.60E+00 | 6.40E-08 | 3.60E-07 |
| ENSG00000147206 | NXF3       | 5.35E+00 | 6.48E-08 | 3.64E-07 |
| ENSG00000141579 | ZNF750     | 5.48E+00 | 6.53E-08 | 3.67E-07 |
| ENSG00000119138 | KLF9       | 1.22E+00 | 6.54E-08 | 3.67E-07 |
| ENSG00000115145 | STAM2      | 1.02E+00 | 6.65E-08 | 3.73E-07 |
| ENSG00000153214 | TMEM87B    | 1.11E+00 | 6.65E-08 | 3.73E-07 |
| ENSG00000205352 | PRR13      | 1.18E+00 | 6.80E-08 | 3.81E-07 |
| ENSG00000172927 | MYEOV      | 3.62E+00 | 6.87E-08 | 3.84E-07 |
| ENSG00000127603 | MACF1      | 1.03E+00 | 6.92E-08 | 3.87E-07 |
| ENSG00000054967 | RELT       | 1.04E+00 | 7.03E-08 | 3.93E-07 |
| ENSG00000003402 | CFLAR      | 1.02E+00 | 7.18E-08 | 4.01E-07 |
| ENSG00000104067 | TJP1       | 1.30E+00 | 7.27E-08 | 4.06E-07 |
| ENSG00000114378 | HYAL1      | 4.51E+00 | 7.36E-08 | 4.10E-07 |
| ENSG00000174672 | BRSK2      | 1.82E+00 | 7.48E-08 | 4.17E-07 |
| ENSG00000167772 | ANGPTL4    | 1.87E+00 | 7.52E-08 | 4.19E-07 |
| ENSG00000167968 | DNASE1L2   | 2.32E+00 | 7.59E-08 | 4.22E-07 |
| ENSG00000151240 | DIP2C      | 1.31E+00 | 7.73E-08 | 4.30E-07 |
| ENSG00000103044 | HAS3       | 2.81E+00 | 7.77E-08 | 4.32E-07 |
| ENSG00000170271 | FAXDC2     | 2.97E+00 | 8.03E-08 | 4.45E-07 |
| ENSG00000260027 | HOXB7      | 1.15E+00 | 8.26E-08 | 4.58E-07 |
| ENSG00000102683 | SGCG       | 5.47E+00 | 8.48E-08 | 4.69E-07 |
| ENSG00000182261 | NLRP10     | 5.14E+00 | 8.48E-08 | 4.69E-07 |
| ENSG00000173237 | C11orf86   | 3.13E+00 | 8.75E-08 | 4.83E-07 |
| ENSG00000152661 | GJA1       | 1.28E+00 | 8.93E-08 | 4.92E-07 |
| ENSG00000188157 | AGRN       | 1.17E+00 | 8.99E-08 | 4.95E-07 |
| ENSG00000138964 | PARVG      | 6.05E+00 | 9.41E-08 | 5.18E-07 |
| ENSG00000141664 | ZCCHC2     | 1.71E+00 | 9.45E-08 | 5.19E-07 |
| ENSG00000011332 | DPF1       | 1.28E+00 | 9.46E-08 | 5.20E-07 |
| ENSG00000137825 | ITPKA      | 1.24E+00 | 9.54E-08 | 5.24E-07 |
| ENSG00000028116 | VRK2       | 1.29E+00 | 9.71E-08 | 5.33E-07 |
| ENSG00000175591 | P2RY2      | 5.20E+00 | 9.80E-08 | 5.38E-07 |
| ENSG00000110799 | VWF        | 4.28E+00 | 9.88E-08 | 5.42E-07 |
| ENSG00000100078 | PLA2G3     | 5.26E+00 | 9.93E-08 | 5.45E-07 |
| ENSG00000106299 | WASL       | 1.06E+00 | 9.97E-08 | 5.46E-07 |
| ENSG00000141560 | FN3KRP     | 1.07E+00 | 1.02E-07 | 5.58E-07 |
| ENSG00000143776 | CDC42BPA   | 1.04E+00 | 1.03E-07 | 5.62E-07 |
| ENSG00000141542 | RAB40B     | 1.51E+00 | 1.04E-07 | 5.67E-07 |
| ENSG00000287356 | AL590822.3 | 2.51E+00 | 1.08E-07 | 5.90E-07 |
| ENSG00000188833 | ENTPD8     | 4.70E+00 | 1.08E-07 | 5.91E-07 |
| ENSG00000112787 | FBRSL1     | 1.17E+00 | 1.09E-07 | 5.96E-07 |

|                 |            |          |          |          |
|-----------------|------------|----------|----------|----------|
| ENSG00000109610 | SOD3       | 4.86E+00 | 1.11E-07 | 6.02E-07 |
| ENSG00000073605 | GSDMB      | 1.82E+00 | 1.15E-07 | 6.23E-07 |
| ENSG00000090565 | RAB11FIP3  | 1.11E+00 | 1.15E-07 | 6.27E-07 |
| ENSG00000184557 | SOCS3      | 1.11E+00 | 1.15E-07 | 6.27E-07 |
| ENSG00000133424 | LARGE1     | 2.56E+00 | 1.16E-07 | 6.31E-07 |
| ENSG00000141505 | ASGR1      | 2.08E+00 | 1.21E-07 | 6.56E-07 |
| ENSG00000132003 | ZSWIM4     | 1.76E+00 | 1.22E-07 | 6.60E-07 |
| ENSG00000172375 | C2CD2L     | 1.15E+00 | 1.22E-07 | 6.63E-07 |
| ENSG00000141854 | MISP3      | 3.71E+00 | 1.23E-07 | 6.67E-07 |
| ENSG00000118900 | UBN1       | 1.16E+00 | 1.25E-07 | 6.78E-07 |
| ENSG00000126016 | AMOT       | 2.97E+00 | 1.26E-07 | 6.82E-07 |
| ENSG00000184730 | APOBR      | 5.09E+00 | 1.29E-07 | 6.98E-07 |
| ENSG00000215154 | AC141586.1 | 2.20E+00 | 1.30E-07 | 7.02E-07 |
| ENSG00000103154 | NECAB2     | 3.80E+00 | 1.35E-07 | 7.26E-07 |
| ENSG00000147174 | GCNA       | 2.62E+00 | 1.40E-07 | 7.54E-07 |
| ENSG00000145794 | MEGF10     | 1.65E+00 | 1.46E-07 | 7.86E-07 |
| ENSG00000167311 | ART5       | 2.70E+00 | 1.46E-07 | 7.87E-07 |
| ENSG00000066468 | FGFR2      | 1.79E+00 | 1.48E-07 | 7.94E-07 |
| ENSG00000261359 | PYCARD-AS1 | 3.33E+00 | 1.53E-07 | 8.21E-07 |
| ENSG00000198265 | HELZ       | 1.26E+00 | 1.56E-07 | 8.33E-07 |
| ENSG00000176912 | TYMSOS     | 1.90E+00 | 1.57E-07 | 8.38E-07 |
| ENSG00000186350 | RXRA       | 1.04E+00 | 1.58E-07 | 8.43E-07 |
| ENSG00000215156 | AC138409.1 | 5.21E+00 | 1.59E-07 | 8.48E-07 |
| ENSG00000186222 | BLOC1S4    | 1.09E+00 | 1.60E-07 | 8.53E-07 |
| ENSG00000021762 | OSBPL5     | 2.15E+00 | 1.64E-07 | 8.76E-07 |
| ENSG00000285517 | AC010198.2 | 1.12E+00 | 1.66E-07 | 8.83E-07 |
| ENSG00000154025 | SLC5A10    | 4.75E+00 | 1.72E-07 | 9.18E-07 |
| ENSG00000066422 | ZBTB11     | 1.13E+00 | 1.74E-07 | 9.26E-07 |
| ENSG00000196218 | RYR1       | 4.59E+00 | 1.78E-07 | 9.44E-07 |
| ENSG00000130270 | ATP8B3     | 2.08E+00 | 1.79E-07 | 9.50E-07 |
| ENSG00000180209 | MYLPF      | 3.51E+00 | 1.82E-07 | 9.67E-07 |
| ENSG00000155265 | GOLGA7B    | 3.49E+00 | 1.84E-07 | 9.75E-07 |
| ENSG00000178372 | CALML5     | 5.52E+00 | 1.84E-07 | 9.75E-07 |
| ENSG00000129003 | VPS13C     | 1.18E+00 | 1.89E-07 | 1.00E-06 |
| ENSG00000141298 | SSH2       | 1.02E+00 | 1.90E-07 | 1.01E-06 |
| ENSG00000182324 | KCNJ14     | 2.08E+00 | 1.90E-07 | 1.01E-06 |
| ENSG00000120690 | ELF1       | 1.01E+00 | 1.95E-07 | 1.03E-06 |
| ENSG00000183337 | BCOR       | 1.22E+00 | 1.95E-07 | 1.03E-06 |
| ENSG00000161682 | FAM171A2   | 1.35E+00 | 1.98E-07 | 1.05E-06 |
| ENSG00000150401 | DCUN1D2    | 1.40E+00 | 1.99E-07 | 1.05E-06 |

|                 |             |          |          |          |
|-----------------|-------------|----------|----------|----------|
| ENSG00000167414 | GNG8        | 5.57E+00 | 2.02E-07 | 1.07E-06 |
| ENSG00000258602 | LINC01629   | 4.20E+00 | 2.19E-07 | 1.15E-06 |
| ENSG00000169594 | BNC1        | 1.79E+00 | 2.31E-07 | 1.22E-06 |
| ENSG00000092067 | CEBPE       | 4.94E+00 | 2.33E-07 | 1.22E-06 |
| ENSG00000167100 | SAMD14      | 1.62E+00 | 2.35E-07 | 1.24E-06 |
| ENSG00000184012 | TMPRSS2     | 4.10E+00 | 2.39E-07 | 1.25E-06 |
| ENSG00000171621 | SPSB1       | 1.40E+00 | 2.39E-07 | 1.26E-06 |
| ENSG00000075945 | KIFAP3      | 1.96E+00 | 2.43E-07 | 1.27E-06 |
| ENSG00000175147 | TMEM51-AS1  | 4.36E+00 | 2.47E-07 | 1.29E-06 |
| ENSG00000224051 | CPTP        | 1.37E+00 | 2.48E-07 | 1.30E-06 |
| ENSG00000081277 | PKP1        | 4.42E+00 | 2.51E-07 | 1.31E-06 |
| ENSG00000275395 | FCGBP       | 3.84E+00 | 2.55E-07 | 1.33E-06 |
| ENSG00000179588 | ZFPM1       | 1.32E+00 | 2.58E-07 | 1.35E-06 |
| ENSG00000204084 | INPP5B      | 1.63E+00 | 2.61E-07 | 1.36E-06 |
| ENSG00000225746 | MEG8        | 5.06E+00 | 2.64E-07 | 1.37E-06 |
| ENSG00000145780 | FEM1C       | 1.19E+00 | 2.64E-07 | 1.38E-06 |
| ENSG00000178573 | MAF         | 2.40E+00 | 2.68E-07 | 1.39E-06 |
| ENSG00000139132 | FGD4        | 2.33E+00 | 2.74E-07 | 1.42E-06 |
| ENSG00000267607 | AC011511.5  | 5.65E+00 | 2.76E-07 | 1.44E-06 |
| ENSG00000165804 | ZNF219      | 1.18E+00 | 2.79E-07 | 1.45E-06 |
| ENSG00000204882 | GPR20       | 4.56E+00 | 2.80E-07 | 1.46E-06 |
| ENSG00000228705 | LINC00659   | 4.66E+00 | 2.81E-07 | 1.46E-06 |
| ENSG00000108370 | RGS9        | 2.13E+00 | 2.83E-07 | 1.47E-06 |
| ENSG00000261713 | SSTR5-AS1   | 5.12E+00 | 2.86E-07 | 1.48E-06 |
| ENSG00000099889 | ARVCF       | 1.67E+00 | 2.87E-07 | 1.49E-06 |
| ENSG00000215853 | RPTN        | 5.27E+00 | 2.87E-07 | 1.49E-06 |
| ENSG00000280027 | AC007342.9  | 4.91E+00 | 2.89E-07 | 1.50E-06 |
| ENSG00000170835 | CEL         | 3.06E+00 | 2.89E-07 | 1.50E-06 |
| ENSG00000280693 | SH3PXD2A-AS | 5.31E+00 | 2.91E-07 | 1.51E-06 |
| ENSG00000273749 | CYFIP1      | 1.04E+00 | 2.94E-07 | 1.52E-06 |
| ENSG00000287431 | AC027601.6  | 2.13E+00 | 3.00E-07 | 1.55E-06 |
| ENSG00000186716 | BCR         | 1.41E+00 | 3.02E-07 | 1.56E-06 |
| ENSG00000196388 | INCA1       | 3.42E+00 | 3.04E-07 | 1.57E-06 |
| ENSG00000287763 | AC068279.2  | 3.96E+00 | 3.05E-07 | 1.57E-06 |
| ENSG00000135272 | MDFIC       | 1.67E+00 | 3.17E-07 | 1.63E-06 |
| ENSG00000205362 | MT1A        | 5.12E+00 | 3.18E-07 | 1.64E-06 |
| ENSG00000227051 | C14orf132   | 1.25E+00 | 3.38E-07 | 1.74E-06 |
| ENSG00000135540 | NHSL1       | 1.80E+00 | 3.39E-07 | 1.74E-06 |
| ENSG00000100314 | CABP7       | 3.21E+00 | 3.44E-07 | 1.76E-06 |
| ENSG0000010030  | ETV7        | 2.58E+00 | 3.55E-07 | 1.81E-06 |

|                 |            |          |          |          |
|-----------------|------------|----------|----------|----------|
| ENSG00000136720 | HS6ST1     | 1.21E+00 | 3.57E-07 | 1.83E-06 |
| ENSG00000198513 | ATL1       | 2.08E+00 | 3.60E-07 | 1.84E-06 |
| ENSG00000142149 | HUNK       | 1.70E+00 | 3.63E-07 | 1.86E-06 |
| ENSG00000140950 | MEAK7      | 1.34E+00 | 3.64E-07 | 1.86E-06 |
| ENSG00000165891 | E2F7       | 1.05E+00 | 3.69E-07 | 1.89E-06 |
| ENSG00000154710 | RABGEF1    | 2.13E+00 | 3.73E-07 | 1.90E-06 |
| ENSG00000144959 | NCEH1      | 1.02E+00 | 3.74E-07 | 1.91E-06 |
| ENSG00000167191 | GPRC5B     | 1.34E+00 | 3.74E-07 | 1.91E-06 |
| ENSG00000100055 | CYTH4      | 5.04E+00 | 3.80E-07 | 1.94E-06 |
| ENSG00000115596 | WNT6       | 1.61E+00 | 3.82E-07 | 1.95E-06 |
| ENSG00000110042 | DTX4       | 2.75E+00 | 3.84E-07 | 1.96E-06 |
| ENSG00000181097 | AC105219.1 | 2.43E+00 | 3.85E-07 | 1.96E-06 |
| ENSG00000116954 | RRAGC      | 1.16E+00 | 3.87E-07 | 1.97E-06 |
| ENSG00000251230 | MIR3945HG  | 5.11E+00 | 4.02E-07 | 2.04E-06 |
| ENSG00000146802 | TMEM168    | 1.27E+00 | 4.09E-07 | 2.07E-06 |
| ENSG00000109270 | LAMTOR3    | 1.13E+00 | 4.09E-07 | 2.08E-06 |
| ENSG00000100987 | VSX1       | 4.69E+00 | 4.11E-07 | 2.08E-06 |
| ENSG00000007237 | GAS7       | 4.57E+00 | 4.16E-07 | 2.10E-06 |
| ENSG00000266714 | MYO15B     | 2.80E+00 | 4.36E-07 | 2.20E-06 |
| ENSG00000198246 | SLC29A3    | 1.67E+00 | 4.58E-07 | 2.31E-06 |
| ENSG00000130706 | ADRM1      | 1.03E+00 | 4.60E-07 | 2.32E-06 |
| ENSG00000167549 | CORO6      | 2.46E+00 | 4.63E-07 | 2.33E-06 |
| ENSG00000166825 | ANPEP      | 1.82E+00 | 4.64E-07 | 2.34E-06 |
| ENSG00000135740 | SLC9A5     | 1.53E+00 | 4.64E-07 | 2.34E-06 |
| ENSG00000258102 | MAP1LC3B2  | 2.92E+00 | 4.79E-07 | 2.41E-06 |
| ENSG00000103316 | CRYM       | 4.55E+00 | 4.85E-07 | 2.44E-06 |
| ENSG00000156463 | SH3RF2     | 2.07E+00 | 4.89E-07 | 2.46E-06 |
| ENSG00000105538 | RASIP1     | 3.56E+00 | 4.89E-07 | 2.46E-06 |
| ENSG00000105289 | TJP3       | 3.75E+00 | 4.98E-07 | 2.50E-06 |
| ENSG00000091490 | SEL1L3     | 1.27E+00 | 5.04E-07 | 2.53E-06 |
| ENSG00000147437 | GNRH1      | 2.33E+00 | 5.08E-07 | 2.54E-06 |
| ENSG00000130287 | NCAN       | 4.94E+00 | 5.13E-07 | 2.57E-06 |
| ENSG00000245146 | MALINC1    | 2.52E+00 | 5.15E-07 | 2.58E-06 |
| ENSG00000185101 | ANO9       | 4.74E+00 | 5.36E-07 | 2.68E-06 |
| ENSG00000147100 | SLC16A2    | 1.64E+00 | 5.53E-07 | 2.76E-06 |
| ENSG00000158815 | FGF17      | 4.67E+00 | 5.61E-07 | 2.80E-06 |
| ENSG00000181885 | CLDN7      | 4.30E+00 | 5.62E-07 | 2.80E-06 |
| ENSG00000163297 | ANTXR2     | 1.24E+00 | 5.67E-07 | 2.82E-06 |
| ENSG00000249859 | PVT1       | 1.02E+00 | 5.71E-07 | 2.84E-06 |
| ENSG00000157766 | ACAN       | 2.75E+00 | 5.84E-07 | 2.90E-06 |

|                 |             |          |          |          |
|-----------------|-------------|----------|----------|----------|
| ENSG00000137145 | DENND4C     | 1.10E+00 | 5.84E-07 | 2.91E-06 |
| ENSG00000260877 | AP005233.2  | 5.30E+00 | 5.89E-07 | 2.93E-06 |
| ENSG00000196436 | NPIPB15     | 4.43E+00 | 5.92E-07 | 2.94E-06 |
| ENSG00000287725 | AP003071.5  | 3.90E+00 | 5.95E-07 | 2.95E-06 |
| ENSG00000144130 | NT5DC4      | 5.39E+00 | 6.12E-07 | 3.03E-06 |
| ENSG00000106927 | AMBP        | 3.81E+00 | 6.14E-07 | 3.04E-06 |
| ENSG00000274422 | AC245060.5  | 1.76E+00 | 6.19E-07 | 3.06E-06 |
| ENSG00000168913 | ENHO        | 1.52E+00 | 6.21E-07 | 3.07E-06 |
| ENSG00000182612 | TSPAN10     | 2.26E+00 | 6.23E-07 | 3.08E-06 |
| ENSG00000154099 | DNAAF1      | 5.21E+00 | 6.35E-07 | 3.13E-06 |
| ENSG00000196605 | ZNF846      | 2.77E+00 | 6.53E-07 | 3.22E-06 |
| ENSG00000224614 | TNK2-AS1    | 3.99E+00 | 6.54E-07 | 3.23E-06 |
| ENSG00000188293 | IGFL1       | 5.26E+00 | 6.63E-07 | 3.27E-06 |
| ENSG00000172159 | FRMD3       | 3.12E+00 | 6.70E-07 | 3.30E-06 |
| ENSG00000037280 | FLT4        | 3.67E+00 | 6.73E-07 | 3.31E-06 |
| ENSG00000114547 | ROPN1B      | 4.69E+00 | 6.73E-07 | 3.31E-06 |
| ENSG00000272789 | AC010976.2  | 4.43E+00 | 6.72E-07 | 3.31E-06 |
| ENSG00000049759 | NEDD4L      | 1.11E+00 | 6.87E-07 | 3.38E-06 |
| ENSG00000171385 | KCND3       | 5.44E+00 | 6.95E-07 | 3.41E-06 |
| ENSG00000066455 | GOLGA5      | 1.02E+00 | 7.03E-07 | 3.45E-06 |
| ENSG00000125898 | FAM110A     | 1.17E+00 | 7.10E-07 | 3.48E-06 |
| ENSG00000136859 | ANGPTL2     | 1.45E+00 | 7.10E-07 | 3.48E-06 |
| ENSG00000287853 | AL031668.2  | 3.47E+00 | 7.12E-07 | 3.49E-06 |
| ENSG00000106012 | IQCE        | 1.23E+00 | 7.13E-07 | 3.49E-06 |
| ENSG00000171443 | ZNF524      | 1.90E+00 | 7.25E-07 | 3.55E-06 |
| ENSG00000189350 | TOGARAM2    | 3.56E+00 | 7.48E-07 | 3.66E-06 |
| ENSG00000064270 | ATP2C2      | 4.25E+00 | 7.59E-07 | 3.71E-06 |
| ENSG00000031081 | ARHGAP31    | 1.29E+00 | 7.62E-07 | 3.73E-06 |
| ENSG00000111679 | PTPN6       | 3.72E+00 | 7.67E-07 | 3.75E-06 |
| ENSG00000215769 | ARHGAP27P1- | 4.01E+00 | 7.71E-07 | 3.76E-06 |
| ENSG00000141971 | MVB12A      | 1.16E+00 | 7.81E-07 | 3.81E-06 |
| ENSG00000160188 | RSPH1       | 4.24E+00 | 7.87E-07 | 3.83E-06 |
| ENSG00000198570 | RD3         | 4.86E+00 | 7.87E-07 | 3.83E-06 |
| ENSG00000100284 | TOM1        | 1.05E+00 | 7.92E-07 | 3.86E-06 |
| ENSG00000182704 | TSKU        | 1.18E+00 | 7.93E-07 | 3.86E-06 |
| ENSG00000256980 | KHDC1L      | 4.15E+00 | 7.98E-07 | 3.89E-06 |
| ENSG00000225511 | LINC00475   | 3.28E+00 | 8.07E-07 | 3.93E-06 |
| ENSG00000188100 | FAM25A      | 5.97E+00 | 8.08E-07 | 3.93E-06 |
| ENSG00000078900 | TP73        | 1.62E+00 | 8.14E-07 | 3.96E-06 |
| ENSG00000171316 | CHD7        | 1.10E+00 | 8.20E-07 | 3.99E-06 |



|                 |            |          |          |          |
|-----------------|------------|----------|----------|----------|
| ENSG00000063180 | CA11       | 1.65E+00 | 8.20E-07 | 3.99E-06 |
| ENSG00000107521 | HPS1       | 1.06E+00 | 8.24E-07 | 4.00E-06 |
| ENSG00000181404 | WASHC1     | 1.51E+00 | 8.30E-07 | 4.03E-06 |
| ENSG00000124299 | PEPD       | 1.07E+00 | 8.42E-07 | 4.08E-06 |
| ENSG00000198804 | MT-CO1     | 1.03E+00 | 8.50E-07 | 4.12E-06 |
| ENSG00000156050 | FAM161B    | 1.55E+00 | 8.69E-07 | 4.21E-06 |
| ENSG00000196378 | ZNF34      | 2.89E+00 | 8.77E-07 | 4.24E-06 |
| ENSG00000185024 | BRF1       | 1.04E+00 | 8.82E-07 | 4.26E-06 |
| ENSG00000251131 | AC025171.3 | 3.40E+00 | 8.82E-07 | 4.27E-06 |
| ENSG00000104833 | TUBB4A     | 2.75E+00 | 9.27E-07 | 4.46E-06 |
| ENSG00000167083 | GNGT2      | 5.36E+00 | 9.42E-07 | 4.54E-06 |
| ENSG00000071242 | RPS6KA2    | 1.69E+00 | 9.62E-07 | 4.62E-06 |
| ENSG00000175600 | SUGCT      | 1.86E+00 | 9.76E-07 | 4.69E-06 |
| ENSG00000163995 | ABLIM2     | 4.90E+00 | 9.98E-07 | 4.79E-06 |
| ENSG00000075388 | FGF4       | 4.37E+00 | 1.03E-06 | 4.93E-06 |
| ENSG00000215644 | GCGR       | 5.05E+00 | 1.04E-06 | 4.99E-06 |
| ENSG00000117036 | ETV3       | 1.26E+00 | 1.06E-06 | 5.08E-06 |
| ENSG00000104059 | FAM189A1   | 4.22E+00 | 1.07E-06 | 5.11E-06 |
| ENSG00000198300 | PEG3       | 4.93E+00 | 1.07E-06 | 5.11E-06 |
| ENSG00000120055 | C10orf95   | 3.79E+00 | 1.07E-06 | 5.12E-06 |
| ENSG00000178150 | ZNF114     | 2.96E+00 | 1.11E-06 | 5.29E-06 |
| ENSG00000070444 | MNT        | 1.19E+00 | 1.12E-06 | 5.33E-06 |
| ENSG00000182749 | PAQR7      | 1.90E+00 | 1.16E-06 | 5.51E-06 |
| ENSG00000120949 | TNFRSF8    | 4.92E+00 | 1.17E-06 | 5.58E-06 |
| ENSG00000221821 | C6orf226   | 1.80E+00 | 1.17E-06 | 5.58E-06 |
| ENSG00000164047 | CAMP       | 4.62E+00 | 1.18E-06 | 5.62E-06 |
| ENSG00000245025 | AC107959.1 | 3.69E+00 | 1.18E-06 | 5.63E-06 |
| ENSG00000164715 | LMTK2      | 1.20E+00 | 1.18E-06 | 5.63E-06 |
| ENSG00000228526 | MIR34AHG   | 1.90E+00 | 1.20E-06 | 5.69E-06 |
| ENSG00000223572 | CKMT1A     | 3.32E+00 | 1.20E-06 | 5.72E-06 |
| ENSG00000158258 | CLSTN2     | 2.85E+00 | 1.21E-06 | 5.74E-06 |
| ENSG00000099338 | CATSPERG   | 4.92E+00 | 1.22E-06 | 5.78E-06 |
| ENSG00000106991 | ENG        | 1.24E+00 | 1.24E-06 | 5.90E-06 |
| ENSG00000083844 | ZNF264     | 1.23E+00 | 1.27E-06 | 6.01E-06 |
| ENSG00000118420 | UBE3D      | 1.21E+00 | 1.29E-06 | 6.08E-06 |
| ENSG00000241404 | EGFL8      | 3.47E+00 | 1.29E-06 | 6.10E-06 |
| ENSG00000213977 | TAX1BP3    | 1.03E+00 | 1.29E-06 | 6.11E-06 |
| ENSG00000132510 | KDM6B      | 1.17E+00 | 1.30E-06 | 6.14E-06 |
| ENSG00000132950 | ZMYM5      | 1.08E+00 | 1.32E-06 | 6.21E-06 |
| ENSG00000101098 | RIMS4      | 4.32E+00 | 1.34E-06 | 6.30E-06 |

|                 |             |          |          |          |
|-----------------|-------------|----------|----------|----------|
| ENSG00000067141 | NEO1        | 1.69E+00 | 1.35E-06 | 6.38E-06 |
| ENSG00000184163 | C1QTNF12    | 3.23E+00 | 1.39E-06 | 6.53E-06 |
| ENSG00000104972 | LILRB1      | 5.17E+00 | 1.43E-06 | 6.72E-06 |
| ENSG00000153029 | MR1         | 1.48E+00 | 1.45E-06 | 6.82E-06 |
| ENSG00000118137 | APOA1       | 3.80E+00 | 1.47E-06 | 6.90E-06 |
| ENSG00000160145 | KALRN       | 1.25E+00 | 1.54E-06 | 7.22E-06 |
| ENSG00000164626 | KCNK5       | 3.13E+00 | 1.54E-06 | 7.22E-06 |
| ENSG00000102302 | FGD1        | 1.21E+00 | 1.54E-06 | 7.23E-06 |
| ENSG00000274993 | AC254629.1  | 4.71E+00 | 1.61E-06 | 7.55E-06 |
| ENSG00000015520 | NPC1L1      | 4.30E+00 | 1.63E-06 | 7.61E-06 |
| ENSG00000233974 | AC138951.1  | 5.13E+00 | 1.63E-06 | 7.62E-06 |
| ENSG00000182389 | CACNB4      | 4.63E+00 | 1.63E-06 | 7.65E-06 |
| ENSG00000256940 | PPP1R14B-AS | 2.57E+00 | 1.64E-06 | 7.66E-06 |
| ENSG00000166562 | SEC11C      | 1.05E+00 | 1.66E-06 | 7.76E-06 |
| ENSG00000160182 | TFF1        | 5.07E+00 | 1.66E-06 | 7.77E-06 |
| ENSG00000283235 | AC139493.2  | 4.99E+00 | 1.66E-06 | 7.77E-06 |
| ENSG00000170485 | NPAS2       | 2.07E+00 | 1.67E-06 | 7.79E-06 |
| ENSG00000173890 | GPR160      | 2.96E+00 | 1.69E-06 | 7.88E-06 |
| ENSG00000177427 | MIEF2       | 1.39E+00 | 1.71E-06 | 7.96E-06 |
| ENSG00000151116 | UEVLD       | 1.28E+00 | 1.72E-06 | 8.00E-06 |
| ENSG00000100056 | ESS2        | 1.02E+00 | 1.73E-06 | 8.05E-06 |
| ENSG00000106089 | STX1A       | 1.66E+00 | 1.75E-06 | 8.15E-06 |
| ENSG00000144045 | DQX1        | 2.91E+00 | 1.75E-06 | 8.15E-06 |
| ENSG00000003400 | CASP10      | 5.02E+00 | 1.78E-06 | 8.27E-06 |
| ENSG00000187258 | NPSR1       | 5.06E+00 | 1.79E-06 | 8.31E-06 |
| ENSG00000161509 | GRIN2C      | 3.99E+00 | 1.79E-06 | 8.32E-06 |
| ENSG00000047644 | WWC3        | 1.11E+00 | 1.81E-06 | 8.41E-06 |
| ENSG00000229967 | MAGEA4-AS1  | 4.91E+00 | 1.84E-06 | 8.54E-06 |
| ENSG00000124249 | KCNK15      | 4.16E+00 | 1.86E-06 | 8.61E-06 |
| ENSG00000168564 | CDKN2AIP    | 1.07E+00 | 1.86E-06 | 8.62E-06 |
| ENSG00000073737 | DHRS9       | 5.22E+00 | 1.88E-06 | 8.72E-06 |
| ENSG00000269404 | SPIB        | 3.93E+00 | 1.89E-06 | 8.76E-06 |
| ENSG00000112297 | CRYBG1      | 1.08E+00 | 1.93E-06 | 8.92E-06 |
| ENSG00000278558 | TMEM191B    | 4.15E+00 | 1.94E-06 | 8.95E-06 |
| ENSG00000109083 | IFT20       | 1.01E+00 | 1.98E-06 | 9.16E-06 |
| ENSG00000105472 | CLEC11A     | 1.68E+00 | 2.00E-06 | 9.23E-06 |
| ENSG00000185668 | POU3F1      | 2.76E+00 | 2.02E-06 | 9.29E-06 |
| ENSG00000117122 | MFAP2       | 3.72E+00 | 2.05E-06 | 9.46E-06 |
| ENSG00000221890 | NPTXR       | 1.04E+00 | 2.06E-06 | 9.51E-06 |
| ENSG00000090539 | CHRD        | 2.46E+00 | 2.09E-06 | 9.64E-06 |

|                 |            |          |          |          |
|-----------------|------------|----------|----------|----------|
| ENSG00000159399 | HK2        | 1.32E+00 | 2.22E-06 | 1.02E-05 |
| ENSG00000159753 | CARMIL2    | 2.22E+00 | 2.24E-06 | 1.03E-05 |
| ENSG00000143512 | HHIPL2     | 4.64E+00 | 2.24E-06 | 1.03E-05 |
| ENSG00000184574 | LPAR5      | 3.25E+00 | 2.27E-06 | 1.04E-05 |
| ENSG00000261371 | PECAM1     | 2.75E+00 | 2.31E-06 | 1.06E-05 |
| ENSG00000185339 | TCN2       | 2.98E+00 | 2.33E-06 | 1.07E-05 |
| ENSG00000030110 | BAK1       | 1.25E+00 | 2.33E-06 | 1.07E-05 |
| ENSG00000102312 | PORCN      | 1.65E+00 | 2.36E-06 | 1.08E-05 |
| ENSG00000107331 | ABCA2      | 1.14E+00 | 2.49E-06 | 1.14E-05 |
| ENSG00000158445 | KCNB1      | 3.25E+00 | 2.54E-06 | 1.16E-05 |
| ENSG00000269729 | AC006262.2 | 4.95E+00 | 2.64E-06 | 1.20E-05 |
| ENSG00000089847 | ANKRD24    | 4.43E+00 | 2.64E-06 | 1.20E-05 |
| ENSG00000173482 | PTPRM      | 1.14E+00 | 2.75E-06 | 1.25E-05 |
| ENSG00000158552 | ZFAND2B    | 1.07E+00 | 2.77E-06 | 1.26E-05 |
| ENSG00000197969 | VPS13A     | 1.15E+00 | 2.83E-06 | 1.28E-05 |
| ENSG00000198788 | MUC2       | 5.54E+00 | 2.89E-06 | 1.31E-05 |
| ENSG00000225630 | MTND2P28   | 1.52E+00 | 2.90E-06 | 1.31E-05 |
| ENSG00000188599 | NPIPP1     | 1.70E+00 | 2.91E-06 | 1.32E-05 |
| ENSG00000153391 | INO80C     | 1.23E+00 | 3.06E-06 | 1.38E-05 |
| ENSG00000129455 | KLK8       | 5.50E+00 | 3.13E-06 | 1.41E-05 |
| ENSG00000136932 | TRMO       | 1.21E+00 | 3.13E-06 | 1.41E-05 |
| ENSG00000167625 | ZNF526     | 1.11E+00 | 3.17E-06 | 1.43E-05 |
| ENSG00000101443 | WFDC2      | 2.70E+00 | 3.19E-06 | 1.43E-05 |
| ENSG00000065361 | ERBB3      | 1.66E+00 | 3.20E-06 | 1.44E-05 |
| ENSG00000130299 | GTPBP3     | 1.08E+00 | 3.21E-06 | 1.44E-05 |
| ENSG00000163464 | CXCR1      | 5.04E+00 | 3.24E-06 | 1.45E-05 |
| ENSG00000167972 | ABCA3      | 2.22E+00 | 3.28E-06 | 1.47E-05 |
| ENSG00000172543 | CTSW       | 4.39E+00 | 3.29E-06 | 1.48E-05 |
| ENSG00000130528 | HRC        | 5.21E+00 | 3.29E-06 | 1.48E-05 |
| ENSG00000068976 | PYGM       | 4.43E+00 | 3.38E-06 | 1.51E-05 |
| ENSG00000172197 | MBOAT1     | 2.06E+00 | 3.42E-06 | 1.53E-05 |
| ENSG00000139323 | POC1B      | 1.36E+00 | 3.45E-06 | 1.54E-05 |
| ENSG00000125531 | FNDC11     | 3.63E+00 | 3.45E-06 | 1.54E-05 |
| ENSG00000164764 | SBSPON     | 4.16E+00 | 3.48E-06 | 1.56E-05 |
| ENSG00000244694 | PTCHD4     | 3.17E+00 | 3.65E-06 | 1.63E-05 |
| ENSG00000182796 | TMEM198B   | 1.70E+00 | 3.70E-06 | 1.65E-05 |
| ENSG00000141977 | CIB3       | 5.09E+00 | 3.74E-06 | 1.66E-05 |
| ENSG00000214021 | TTLL3      | 1.80E+00 | 3.78E-06 | 1.68E-05 |
| ENSG00000134757 | DSG3       | 5.40E+00 | 4.03E-06 | 1.79E-05 |
| ENSG00000283196 | AC006453.2 | 1.73E+00 | 4.09E-06 | 1.81E-05 |

|                 |            |          |          |          |
|-----------------|------------|----------|----------|----------|
| ENSG00000250067 | YJEFN3     | 1.53E+00 | 4.09E-06 | 1.81E-05 |
| ENSG00000163295 | ALPI       | 4.48E+00 | 4.10E-06 | 1.81E-05 |
| ENSG00000134780 | DAGLA      | 2.69E+00 | 4.15E-06 | 1.83E-05 |
| ENSG00000134815 | DHX34      | 1.53E+00 | 4.16E-06 | 1.84E-05 |
| ENSG00000197933 | ZNF823     | 1.73E+00 | 4.18E-06 | 1.85E-05 |
| ENSG00000234678 | ELF3-AS1   | 4.35E+00 | 4.24E-06 | 1.87E-05 |
| ENSG00000120149 | MSX2       | 1.04E+00 | 4.34E-06 | 1.91E-05 |
| ENSG00000139117 | CPNE8      | 1.59E+00 | 4.35E-06 | 1.92E-05 |
| ENSG00000101198 | NKAIN4     | 2.38E+00 | 4.37E-06 | 1.92E-05 |
| ENSG00000131831 | RAI2       | 4.21E+00 | 4.47E-06 | 1.97E-05 |
| ENSG00000254531 | AP001816.1 | 2.43E+00 | 4.48E-06 | 1.97E-05 |
| ENSG00000167895 | TMC8       | 4.35E+00 | 4.52E-06 | 1.99E-05 |
| ENSG00000255860 | AP000812.2 | 4.78E+00 | 4.56E-06 | 2.00E-05 |
| ENSG00000100918 | REC8       | 2.41E+00 | 4.58E-06 | 2.01E-05 |
| ENSG00000163131 | CTSS       | 1.66E+00 | 4.61E-06 | 2.02E-05 |
| ENSG00000265190 | ANXA8      | 3.57E+00 | 4.63E-06 | 2.03E-05 |
| ENSG00000130584 | ZBTB46     | 1.35E+00 | 4.81E-06 | 2.11E-05 |
| ENSG00000197253 | TPSB2      | 5.06E+00 | 4.83E-06 | 2.12E-05 |
| ENSG00000103490 | PYCARD     | 3.17E+00 | 4.88E-06 | 2.13E-05 |
| ENSG00000119514 | GALNT12    | 3.06E+00 | 4.93E-06 | 2.15E-05 |
| ENSG00000154342 | WNT3A      | 5.35E+00 | 4.95E-06 | 2.16E-05 |
| ENSG00000182472 | CAPN12     | 3.31E+00 | 4.96E-06 | 2.17E-05 |
| ENSG00000140538 | NTRK3      | 3.97E+00 | 5.01E-06 | 2.19E-05 |
| ENSG00000171346 | KRT15      | 3.09E+00 | 5.05E-06 | 2.20E-05 |
| ENSG00000155629 | PIK3AP1    | 2.56E+00 | 5.19E-06 | 2.26E-05 |
| ENSG00000242612 | DECR2      | 1.19E+00 | 5.21E-06 | 2.27E-05 |
| ENSG00000104936 | DMPK       | 1.28E+00 | 5.49E-06 | 2.39E-05 |
| ENSG00000170373 | CST1       | 3.75E+00 | 5.49E-06 | 2.39E-05 |
| ENSG00000275216 | AL161431.1 | 5.11E+00 | 5.50E-06 | 2.39E-05 |
| ENSG00000069812 | HES2       | 2.80E+00 | 5.66E-06 | 2.45E-05 |
| ENSG00000110427 | KIAA1549L  | 1.77E+00 | 5.71E-06 | 2.47E-05 |
| ENSG00000148204 | CRB2       | 4.94E+00 | 5.71E-06 | 2.47E-05 |
| ENSG00000185946 | RNPC3      | 1.20E+00 | 5.73E-06 | 2.48E-05 |
| ENSG00000188215 | DCUN1D3    | 1.05E+00 | 5.76E-06 | 2.49E-05 |
| ENSG00000159496 | RGL4       | 5.35E+00 | 5.82E-06 | 2.52E-05 |
| ENSG00000159307 | SCUBE1     | 3.45E+00 | 5.86E-06 | 2.53E-05 |
| ENSG00000071282 | LMCD1      | 1.35E+00 | 5.90E-06 | 2.55E-05 |
| ENSG00000160013 | PTGIR      | 3.99E+00 | 6.13E-06 | 2.64E-05 |
| ENSG00000130711 | PRDM12     | 5.13E+00 | 6.18E-06 | 2.66E-05 |
| ENSG00000161896 | IP6K3      | 2.37E+00 | 6.27E-06 | 2.70E-05 |

|                 |            |          |          |          |
|-----------------|------------|----------|----------|----------|
| ENSG00000068971 | PPP2R5B    | 1.30E+00 | 6.31E-06 | 2.72E-05 |
| ENSG00000258738 | AL121603.2 | 1.83E+00 | 6.52E-06 | 2.80E-05 |
| ENSG00000105146 | AURKC      | 2.59E+00 | 6.56E-06 | 2.82E-05 |
| ENSG00000099282 | TSPAN15    | 3.36E+00 | 6.62E-06 | 2.84E-05 |
| ENSG00000007545 | CRAMP1     | 1.43E+00 | 6.78E-06 | 2.91E-05 |
| ENSG00000174945 | AMZ1       | 3.44E+00 | 6.89E-06 | 2.95E-05 |
| ENSG00000186654 | PRR5       | 1.70E+00 | 6.95E-06 | 2.98E-05 |
| ENSG00000268223 | ARL14EPL   | 4.75E+00 | 7.01E-06 | 3.00E-05 |
| ENSG00000169184 | MN1        | 1.85E+00 | 7.09E-06 | 3.03E-05 |
| ENSG00000049283 | EPN3       | 3.98E+00 | 7.09E-06 | 3.03E-05 |
| ENSG00000213904 | LIPE-AS1   | 2.22E+00 | 7.12E-06 | 3.05E-05 |
| ENSG00000215440 | NPEPL1     | 2.15E+00 | 7.21E-06 | 3.08E-05 |
| ENSG00000105063 | PPP6R1     | 1.40E+00 | 7.24E-06 | 3.10E-05 |
| ENSG00000040933 | INPP4A     | 1.29E+00 | 7.29E-06 | 3.11E-05 |
| ENSG00000078177 | N4BP2      | 1.23E+00 | 7.33E-06 | 3.13E-05 |
| ENSG00000049540 | ELN        | 4.75E+00 | 7.37E-06 | 3.14E-05 |
| ENSG00000105672 | ETV2       | 2.01E+00 | 7.48E-06 | 3.19E-05 |
| ENSG00000272768 | AC004854.2 | 1.36E+00 | 7.50E-06 | 3.20E-05 |
| ENSG00000102879 | CORO1A     | 1.45E+00 | 7.56E-06 | 3.22E-05 |
| ENSG00000279792 | AC015909.5 | 2.54E+00 | 7.66E-06 | 3.26E-05 |
| ENSG00000141750 | STAC2      | 1.35E+00 | 7.81E-06 | 3.32E-05 |
| ENSG00000102554 | KLF5       | 2.48E+00 | 7.88E-06 | 3.35E-05 |
| ENSG00000273812 | BX640514.2 | 4.17E+00 | 8.04E-06 | 3.41E-05 |
| ENSG00000148384 | INPP5E     | 1.01E+00 | 8.32E-06 | 3.52E-05 |
| ENSG00000197467 | COL13A1    | 2.64E+00 | 8.40E-06 | 3.56E-05 |
| ENSG00000256518 | AP000812.3 | 5.04E+00 | 8.43E-06 | 3.57E-05 |
| ENSG00000160179 | ABCG1      | 3.28E+00 | 8.51E-06 | 3.60E-05 |
| ENSG00000276600 | RAB7B      | 1.71E+00 | 8.52E-06 | 3.60E-05 |
| ENSG00000177426 | TGIF1      | 1.01E+00 | 8.54E-06 | 3.61E-05 |
| ENSG00000176387 | HSD11B2    | 2.44E+00 | 8.55E-06 | 3.61E-05 |
| ENSG00000197136 | PCNX3      | 1.16E+00 | 8.68E-06 | 3.66E-05 |
| ENSG00000196781 | TLE1       | 1.17E+00 | 8.80E-06 | 3.72E-05 |
| ENSG00000108306 | FBXL20     | 1.13E+00 | 8.87E-06 | 3.74E-05 |
| ENSG00000169972 | PUSL1      | 1.19E+00 | 8.95E-06 | 3.77E-05 |
| ENSG00000158106 | RHPN1      | 1.60E+00 | 9.10E-06 | 3.83E-05 |
| ENSG00000231969 | AC007364.1 | 3.74E+00 | 9.35E-06 | 3.93E-05 |
| ENSG00000232070 | TMEM253    | 3.74E+00 | 9.62E-06 | 4.04E-05 |
| ENSG00000260001 | TGFBR3L    | 1.46E+00 | 9.68E-06 | 4.06E-05 |
| ENSG00000095397 | WHRN       | 1.36E+00 | 9.87E-06 | 4.14E-05 |
| ENSG00000125820 | NKX2-2     | 4.81E+00 | 1.00E-05 | 4.20E-05 |

|                 |            |          |          |          |
|-----------------|------------|----------|----------|----------|
| ENSG00000188613 | NANOS1     | 2.08E+00 | 1.02E-05 | 4.28E-05 |
| ENSG00000130363 | RSPH3      | 1.05E+00 | 1.02E-05 | 4.28E-05 |
| ENSG00000235098 | ANKRD65    | 4.12E+00 | 1.03E-05 | 4.30E-05 |
| ENSG00000184363 | PKP3       | 3.33E+00 | 1.04E-05 | 4.33E-05 |
| ENSG00000176945 | MUC20      | 4.36E+00 | 1.04E-05 | 4.34E-05 |
| ENSG00000176136 | MC5R       | 4.78E+00 | 1.04E-05 | 4.35E-05 |
| ENSG00000112039 | FANCE      | 1.31E+00 | 1.05E-05 | 4.38E-05 |
| ENSG00000253741 | LNCOC1     | 4.17E+00 | 1.10E-05 | 4.59E-05 |
| ENSG00000065526 | SPEN       | 1.05E+00 | 1.11E-05 | 4.61E-05 |
| ENSG00000061455 | PRDM6      | 3.91E+00 | 1.14E-05 | 4.73E-05 |
| ENSG00000124343 | XG         | 4.51E+00 | 1.15E-05 | 4.76E-05 |
| ENSG00000239305 | RNF103     | 1.06E+00 | 1.15E-05 | 4.77E-05 |
| ENSG00000184343 | SRPK3      | 4.33E+00 | 1.17E-05 | 4.86E-05 |
| ENSG00000187608 | ISG15      | 1.44E+00 | 1.17E-05 | 4.86E-05 |
| ENSG00000164400 | CSF2       | 3.61E+00 | 1.20E-05 | 4.98E-05 |
| ENSG00000197279 | ZNF165     | 2.00E+00 | 1.21E-05 | 4.99E-05 |
| ENSG00000136999 | CCN3       | 2.94E+00 | 1.21E-05 | 5.00E-05 |
| ENSG00000273066 | AL355987.4 | 1.64E+00 | 1.22E-05 | 5.05E-05 |
| ENSG00000125740 | FOSB       | 1.34E+00 | 1.25E-05 | 5.14E-05 |
| ENSG00000108786 | HSD17B1    | 2.40E+00 | 1.25E-05 | 5.15E-05 |
| ENSG00000138678 | GPAT3      | 2.60E+00 | 1.27E-05 | 5.23E-05 |
| ENSG00000109686 | SH3D19     | 1.17E+00 | 1.27E-05 | 5.25E-05 |
| ENSG00000166401 | SERPINB8   | 1.55E+00 | 1.29E-05 | 5.29E-05 |
| ENSG00000158296 | SLC13A3    | 3.72E+00 | 1.33E-05 | 5.47E-05 |
| ENSG00000165046 | LETM2      | 1.76E+00 | 1.33E-05 | 5.47E-05 |
| ENSG00000213793 | ZNF888     | 1.67E+00 | 1.34E-05 | 5.47E-05 |
| ENSG00000223511 | AL683807.1 | 3.83E+00 | 1.37E-05 | 5.61E-05 |
| ENSG00000166225 | FRS2       | 1.23E+00 | 1.37E-05 | 5.61E-05 |
| ENSG00000171124 | FUT3       | 4.81E+00 | 1.37E-05 | 5.62E-05 |
| ENSG00000173926 | MARCH3     | 1.50E+00 | 1.39E-05 | 5.67E-05 |
| ENSG00000182327 | GLTPD2     | 4.40E+00 | 1.39E-05 | 5.68E-05 |
| ENSG00000259439 | LINC01833  | 4.34E+00 | 1.40E-05 | 5.70E-05 |
| ENSG00000168309 | FAM107A    | 4.22E+00 | 1.45E-05 | 5.92E-05 |
| ENSG00000168646 | AXIN2      | 1.89E+00 | 1.47E-05 | 5.97E-05 |
| ENSG00000136152 | COG3       | 1.38E+00 | 1.48E-05 | 6.03E-05 |
| ENSG00000262246 | CORO7      | 1.32E+00 | 1.49E-05 | 6.07E-05 |
| ENSG00000134245 | WNT2B      | 2.97E+00 | 1.50E-05 | 6.11E-05 |
| ENSG00000106789 | CORO2A     | 1.18E+00 | 1.53E-05 | 6.22E-05 |
| ENSG00000213398 | LCAT       | 1.59E+00 | 1.57E-05 | 6.36E-05 |
| ENSG00000161055 | SCGB3A1    | 4.70E+00 | 1.60E-05 | 6.47E-05 |

|                 |            |          |          |          |
|-----------------|------------|----------|----------|----------|
| ENSG00000164125 | GASK1B     | 1.31E+00 | 1.63E-05 | 6.59E-05 |
| ENSG00000168661 | ZNF30      | 2.48E+00 | 1.67E-05 | 6.73E-05 |
| ENSG00000185847 | LINC01405  | 4.46E+00 | 1.68E-05 | 6.78E-05 |
| ENSG00000100890 | PRORP      | 1.48E+00 | 1.70E-05 | 6.84E-05 |
| ENSG00000101445 | PPP1R16B   | 2.99E+00 | 1.74E-05 | 7.00E-05 |
| ENSG00000196433 | ASMT       | 4.29E+00 | 1.77E-05 | 7.13E-05 |
| ENSG00000116604 | MEF2D      | 1.03E+00 | 1.78E-05 | 7.16E-05 |
| ENSG00000263465 | SRSF8      | 1.33E+00 | 1.79E-05 | 7.18E-05 |
| ENSG00000133812 | SBF2       | 1.27E+00 | 1.81E-05 | 7.28E-05 |
| ENSG00000112195 | TREML2     | 4.66E+00 | 1.84E-05 | 7.37E-05 |
| ENSG00000277013 | AC008556.1 | 4.69E+00 | 1.84E-05 | 7.38E-05 |
| ENSG00000116691 | MIIP       | 1.07E+00 | 1.85E-05 | 7.42E-05 |
| ENSG00000142959 | BEST4      | 4.57E+00 | 1.86E-05 | 7.43E-05 |
| ENSG00000162896 | PIGR       | 4.95E+00 | 1.86E-05 | 7.45E-05 |
| ENSG00000105755 | ETHE1      | 1.28E+00 | 1.88E-05 | 7.50E-05 |
| ENSG00000150556 | LYPD6B     | 4.30E+00 | 1.88E-05 | 7.50E-05 |
| ENSG00000188315 | C3orf62    | 1.65E+00 | 1.92E-05 | 7.66E-05 |
| ENSG00000157379 | DHRS1      | 2.59E+00 | 1.92E-05 | 7.66E-05 |
| ENSG00000173653 | RCE1       | 1.01E+00 | 1.93E-05 | 7.71E-05 |
| ENSG00000166839 | ANKDD1A    | 1.35E+00 | 1.94E-05 | 7.75E-05 |
| ENSG00000205356 | TECPR1     | 1.40E+00 | 1.99E-05 | 7.93E-05 |
| ENSG00000236935 | AP003774.2 | 4.71E+00 | 2.04E-05 | 8.13E-05 |
| ENSG00000185615 | PDIA2      | 2.99E+00 | 2.05E-05 | 8.15E-05 |
| ENSG00000197191 | CYSRT1     | 2.19E+00 | 2.05E-05 | 8.16E-05 |
| ENSG00000178307 | TMEM11     | 1.21E+00 | 2.06E-05 | 8.17E-05 |
| ENSG00000159713 | TPPP3      | 2.82E+00 | 2.07E-05 | 8.22E-05 |
| ENSG00000137364 | TPMT       | 1.00E+00 | 2.08E-05 | 8.27E-05 |
| ENSG00000263934 | SNORD3A    | 2.65E+00 | 2.09E-05 | 8.28E-05 |
| ENSG00000176884 | GRIN1      | 4.92E+00 | 2.18E-05 | 8.63E-05 |
| ENSG00000162390 | ACOT11     | 3.44E+00 | 2.19E-05 | 8.65E-05 |
| ENSG00000070388 | FGF22      | 4.38E+00 | 2.19E-05 | 8.67E-05 |
| ENSG00000125746 | EML2       | 2.21E+00 | 2.19E-05 | 8.67E-05 |
| ENSG00000089692 | LAG3       | 1.79E+00 | 2.21E-05 | 8.73E-05 |
| ENSG00000170423 | KRT78      | 4.76E+00 | 2.21E-05 | 8.74E-05 |
| ENSG00000163898 | LIPH       | 2.01E+00 | 2.25E-05 | 8.86E-05 |
| ENSG00000012211 | PRICKLE3   | 4.02E+00 | 2.27E-05 | 8.94E-05 |
| ENSG00000261092 | LINC02178  | 5.16E+00 | 2.27E-05 | 8.97E-05 |
| ENSG00000287396 | AL592464.3 | 4.66E+00 | 2.30E-05 | 9.07E-05 |
| ENSG00000179044 | EXOC3L1    | 4.38E+00 | 2.33E-05 | 9.18E-05 |
| ENSG00000107317 | PTGDS      | 4.37E+00 | 2.34E-05 | 9.19E-05 |

|                 |            |          |          |          |
|-----------------|------------|----------|----------|----------|
| ENSG00000174446 | SNAPC5     | 1.23E+00 | 2.42E-05 | 9.51E-05 |
| ENSG00000287600 | AC122719.3 | 4.23E+00 | 2.43E-05 | 9.53E-05 |
| ENSG00000154639 | CXADR      | 1.53E+00 | 2.44E-05 | 9.59E-05 |
| ENSG00000226287 | TMEM191A   | 2.17E+00 | 2.44E-05 | 9.59E-05 |
| ENSG00000227252 | AC012063.1 | 3.03E+00 | 2.46E-05 | 9.64E-05 |
| ENSG00000175206 | NPPA       | 4.99E+00 | 2.47E-05 | 9.67E-05 |
| ENSG00000196689 | TRPV1      | 2.05E+00 | 2.50E-05 | 9.78E-05 |
| ENSG00000090674 | MCOLN1     | 1.60E+00 | 2.56E-05 | 1.00E-04 |
| ENSG00000287263 | AC008875.3 | 1.81E+00 | 2.56E-05 | 1.00E-04 |
| ENSG00000172731 | LRRC20     | 1.65E+00 | 2.57E-05 | 1.00E-04 |
| ENSG00000167716 | WDR81      | 1.23E+00 | 2.59E-05 | 1.01E-04 |
| ENSG00000127831 | VIL1       | 4.84E+00 | 2.66E-05 | 1.04E-04 |
| ENSG00000104870 | FCGRT      | 2.56E+00 | 2.67E-05 | 1.04E-04 |
| ENSG00000165868 | HSPA12A    | 1.11E+00 | 2.70E-05 | 1.05E-04 |
| ENSG00000187583 | PLEKHN1    | 2.02E+00 | 2.76E-05 | 1.07E-04 |
| ENSG00000204323 | SMIM5      | 3.34E+00 | 2.80E-05 | 1.09E-04 |
| ENSG00000112514 | CUTA       | 1.05E+00 | 2.83E-05 | 1.10E-04 |
| ENSG00000151651 | ADAM8      | 2.76E+00 | 2.84E-05 | 1.10E-04 |
| ENSG00000170681 | CAVIN4     | 1.89E+00 | 2.87E-05 | 1.11E-04 |
| ENSG00000234719 | NPIPB2     | 2.54E+00 | 2.90E-05 | 1.13E-04 |
| ENSG00000197971 | MBP        | 1.68E+00 | 2.93E-05 | 1.13E-04 |
| ENSG00000006534 | ALDH3B1    | 1.66E+00 | 2.94E-05 | 1.14E-04 |
| ENSG00000176406 | RIMS2      | 2.67E+00 | 2.95E-05 | 1.14E-04 |
| ENSG00000123358 | NR4A1      | 1.06E+00 | 3.02E-05 | 1.17E-04 |
| ENSG00000089116 | LHX5       | 4.42E+00 | 3.14E-05 | 1.21E-04 |
| ENSG00000157933 | SKI        | 1.21E+00 | 3.16E-05 | 1.22E-04 |
| ENSG00000164692 | COL1A2     | 2.81E+00 | 3.25E-05 | 1.25E-04 |
| ENSG00000179361 | ARID3B     | 1.39E+00 | 3.36E-05 | 1.29E-04 |
| ENSG00000258128 | MKRN9P     | 4.99E+00 | 3.40E-05 | 1.31E-04 |
| ENSG00000118369 | USP35      | 1.83E+00 | 3.45E-05 | 1.32E-04 |
| ENSG00000068831 | RASGRP2    | 2.97E+00 | 3.50E-05 | 1.34E-04 |
| ENSG00000237523 | LINC00857  | 2.02E+00 | 3.56E-05 | 1.36E-04 |
| ENSG00000205625 | AL591499.1 | 4.91E+00 | 3.59E-05 | 1.37E-04 |
| ENSG00000165898 | ISCA2      | 1.08E+00 | 3.59E-05 | 1.37E-04 |
| ENSG00000267248 | AC025048.2 | 2.13E+00 | 3.62E-05 | 1.39E-04 |
| ENSG00000069188 | SDK2       | 4.15E+00 | 3.69E-05 | 1.41E-04 |
| ENSG00000198223 | CSF2RA     | 3.93E+00 | 3.88E-05 | 1.48E-04 |
| ENSG00000133687 | TMTC1      | 1.70E+00 | 3.94E-05 | 1.50E-04 |
| ENSG00000187689 | AMTN       | 4.19E+00 | 3.94E-05 | 1.50E-04 |
| ENSG00000119689 | DLST       | 1.14E+00 | 4.03E-05 | 1.53E-04 |



|                 |            |          |          |          |
|-----------------|------------|----------|----------|----------|
| ENSG00000103449 | SALL1      | 1.80E+00 | 4.03E-05 | 1.53E-04 |
| ENSG00000167644 | C19orf33   | 4.65E+00 | 4.12E-05 | 1.56E-04 |
| ENSG00000086159 | AQP6       | 4.55E+00 | 4.12E-05 | 1.56E-04 |
| ENSG00000137842 | TMEM62     | 1.52E+00 | 4.18E-05 | 1.58E-04 |
| ENSG00000261889 | AC108134.2 | 2.76E+00 | 4.20E-05 | 1.59E-04 |
| ENSG00000188981 | MSANTD1    | 3.88E+00 | 4.23E-05 | 1.60E-04 |
| ENSG00000260260 | SNHG19     | 1.18E+00 | 4.27E-05 | 1.62E-04 |
| ENSG00000109762 | SNX25      | 1.15E+00 | 4.31E-05 | 1.63E-04 |
| ENSG00000225969 | ABHD11-AS1 | 4.87E+00 | 4.31E-05 | 1.63E-04 |
| ENSG00000139880 | CDH24      | 1.55E+00 | 4.36E-05 | 1.65E-04 |
| ENSG00000169418 | NPR1       | 4.32E+00 | 4.38E-05 | 1.66E-04 |
| ENSG00000164265 | SCGB3A2    | 4.73E+00 | 4.57E-05 | 1.72E-04 |
| ENSG00000187210 | GCNT1      | 1.74E+00 | 4.58E-05 | 1.73E-04 |
| ENSG00000213799 | ZNF845     | 1.43E+00 | 4.62E-05 | 1.74E-04 |
| ENSG00000106852 | LHX6       | 2.52E+00 | 4.70E-05 | 1.77E-04 |
| ENSG00000160190 | SLC37A1    | 2.91E+00 | 4.93E-05 | 1.85E-04 |
| ENSG00000273802 | HIST1H2BG  | 1.68E+00 | 4.93E-05 | 1.85E-04 |
| ENSG00000253438 | PCAT1      | 3.11E+00 | 5.08E-05 | 1.90E-04 |
| ENSG00000068615 | REEP1      | 1.62E+00 | 5.11E-05 | 1.92E-04 |
| ENSG00000156414 | TDRD9      | 4.70E+00 | 5.12E-05 | 1.92E-04 |
| ENSG00000254402 | LRRC24     | 2.55E+00 | 5.12E-05 | 1.92E-04 |
| ENSG00000185924 | RTN4RL1    | 1.89E+00 | 5.14E-05 | 1.92E-04 |
| ENSG00000149564 | ESAM       | 2.45E+00 | 5.18E-05 | 1.94E-04 |
| ENSG00000137507 | LRRC32     | 4.33E+00 | 5.24E-05 | 1.96E-04 |
| ENSG00000146477 | SLC22A3    | 3.59E+00 | 5.32E-05 | 1.99E-04 |
| ENSG00000235538 | AL078602.1 | 4.54E+00 | 5.34E-05 | 1.99E-04 |
| ENSG00000223638 | RFPL4A     | 4.80E+00 | 5.38E-05 | 2.01E-04 |
| ENSG00000171798 | KNDC1      | 3.37E+00 | 5.45E-05 | 2.03E-04 |
| ENSG00000072609 | CHFR       | 1.03E+00 | 5.46E-05 | 2.03E-04 |
| ENSG00000163885 | CFAP100    | 4.91E+00 | 5.55E-05 | 2.06E-04 |
| ENSG00000256481 | AP006333.2 | 3.53E+00 | 5.67E-05 | 2.11E-04 |
| ENSG00000108798 | ABI3       | 3.74E+00 | 5.68E-05 | 2.11E-04 |
| ENSG00000130147 | SH3BP4     | 1.04E+00 | 5.68E-05 | 2.11E-04 |
| ENSG00000139679 | LPAR6      | 4.68E+00 | 5.73E-05 | 2.13E-04 |
| ENSG00000163520 | FBLN2      | 3.23E+00 | 5.75E-05 | 2.13E-04 |
| ENSG00000172426 | RSPH9      | 4.60E+00 | 5.78E-05 | 2.14E-04 |
| ENSG00000225611 | LINC02158  | 3.56E+00 | 5.78E-05 | 2.14E-04 |
| ENSG00000180264 | ADGRD2     | 4.83E+00 | 5.79E-05 | 2.15E-04 |
| ENSG00000167780 | SOAT2      | 3.28E+00 | 5.82E-05 | 2.15E-04 |
| ENSG00000260220 | CCDC187    | 4.16E+00 | 5.87E-05 | 2.17E-04 |

|                 |            |          |          |          |
|-----------------|------------|----------|----------|----------|
| ENSG00000261594 | TPBGL      | 2.45E+00 | 5.97E-05 | 2.21E-04 |
| ENSG00000158292 | GPR153     | 1.23E+00 | 6.01E-05 | 2.22E-04 |
| ENSG00000214367 | HAUS3      | 1.12E+00 | 6.05E-05 | 2.23E-04 |
| ENSG00000184261 | KCNK12     | 3.05E+00 | 6.05E-05 | 2.23E-04 |
| ENSG00000168621 | GDNF       | 2.59E+00 | 6.14E-05 | 2.26E-04 |
| ENSG00000261514 | LINC01976  | 4.92E+00 | 6.26E-05 | 2.31E-04 |
| ENSG00000124602 | UNC5CL     | 4.26E+00 | 6.40E-05 | 2.36E-04 |
| ENSG00000279901 | AC092117.2 | 2.93E+00 | 6.49E-05 | 2.39E-04 |
| ENSG00000188283 | ZNF383     | 1.31E+00 | 6.52E-05 | 2.40E-04 |
| ENSG00000197405 | C5AR1      | 3.07E+00 | 6.60E-05 | 2.43E-04 |
| ENSG00000272293 | AC083964.1 | 2.27E+00 | 6.67E-05 | 2.45E-04 |
| ENSG00000269186 | LINC01082  | 5.08E+00 | 6.73E-05 | 2.47E-04 |
| ENSG00000150907 | FOXO1      | 1.72E+00 | 6.74E-05 | 2.47E-04 |
| ENSG00000170498 | KISS1      | 5.46E+00 | 6.77E-05 | 2.48E-04 |
| ENSG00000272459 | AC139795.3 | 2.17E+00 | 6.79E-05 | 2.49E-04 |
| ENSG00000180871 | CXCR2      | 4.40E+00 | 6.95E-05 | 2.55E-04 |
| ENSG00000267751 | AC009005.1 | 2.44E+00 | 7.02E-05 | 2.57E-04 |
| ENSG00000153234 | NR4A2      | 3.54E+00 | 7.04E-05 | 2.58E-04 |
| ENSG00000105321 | CCDC9      | 1.33E+00 | 7.15E-05 | 2.61E-04 |
| ENSG00000108405 | P2RX1      | 4.67E+00 | 7.25E-05 | 2.65E-04 |
| ENSG00000145687 | SSBP2      | 2.55E+00 | 7.25E-05 | 2.65E-04 |
| ENSG00000007402 | CACNA2D2   | 1.85E+00 | 7.27E-05 | 2.65E-04 |
| ENSG00000276952 | AL121772.3 | 3.18E+00 | 7.30E-05 | 2.66E-04 |
| ENSG00000099866 | MADCAM1    | 2.47E+00 | 7.36E-05 | 2.69E-04 |
| ENSG00000158158 | CNNM4      | 1.12E+00 | 7.38E-05 | 2.69E-04 |
| ENSG00000184678 | HIST2H2BE  | 1.63E+00 | 7.39E-05 | 2.69E-04 |
| ENSG00000130182 | ZSCAN10    | 4.66E+00 | 7.45E-05 | 2.71E-04 |
| ENSG00000108576 | SLC6A4     | 4.20E+00 | 7.47E-05 | 2.72E-04 |
| ENSG00000177984 | LCN15      | 2.46E+00 | 7.50E-05 | 2.73E-04 |
| ENSG00000164778 | EN2        | 3.63E+00 | 7.60E-05 | 2.77E-04 |
| ENSG00000172006 | ZNF554     | 1.86E+00 | 7.62E-05 | 2.77E-04 |
| ENSG00000138622 | HCN4       | 3.03E+00 | 7.72E-05 | 2.80E-04 |
| ENSG00000187513 | GJA4       | 4.41E+00 | 7.78E-05 | 2.82E-04 |
| ENSG00000182676 | PPP1R27    | 3.74E+00 | 7.79E-05 | 2.83E-04 |
| ENSG00000164972 | C9orf24    | 3.99E+00 | 7.85E-05 | 2.85E-04 |
| ENSG00000165731 | RET        | 3.52E+00 | 7.92E-05 | 2.87E-04 |
| ENSG00000123191 | ATP7B      | 2.81E+00 | 7.95E-05 | 2.88E-04 |
| ENSG00000160282 | FTCD       | 2.98E+00 | 8.03E-05 | 2.91E-04 |
| ENSG00000109101 | FOXN1      | 4.66E+00 | 8.11E-05 | 2.93E-04 |
| ENSG00000137393 | RNF144B    | 2.26E+00 | 8.13E-05 | 2.94E-04 |

|                 |            |          |          |          |
|-----------------|------------|----------|----------|----------|
| ENSG00000102886 | GDPD3      | 1.91E+00 | 8.13E-05 | 2.94E-04 |
| ENSG00000158125 | XDH        | 2.89E+00 | 8.16E-05 | 2.95E-04 |
| ENSG00000090006 | LTBP4      | 1.18E+00 | 8.18E-05 | 2.95E-04 |
| ENSG00000237499 | WAKMAR2    | 2.23E+00 | 8.24E-05 | 2.97E-04 |
| ENSG00000188818 | ZDHHC11    | 2.90E+00 | 8.26E-05 | 2.98E-04 |
| ENSG00000277449 | CEBPB-AS1  | 2.21E+00 | 8.28E-05 | 2.98E-04 |
| ENSG00000057149 | SERPINB3   | 3.58E+00 | 8.31E-05 | 2.99E-04 |
| ENSG00000268518 | AC020909.2 | 4.78E+00 | 8.33E-05 | 3.00E-04 |
| ENSG00000164938 | TP53INP1   | 1.30E+00 | 8.45E-05 | 3.03E-04 |
| ENSG00000268601 | AC115522.1 | 3.59E+00 | 8.46E-05 | 3.04E-04 |
| ENSG00000286519 | AC009236.1 | 3.55E+00 | 8.65E-05 | 3.10E-04 |
| ENSG00000287510 | AL137857.1 | 4.89E+00 | 8.78E-05 | 3.15E-04 |
| ENSG00000167701 | GPT        | 4.57E+00 | 8.79E-05 | 3.15E-04 |
| ENSG00000120156 | TEK        | 3.74E+00 | 8.86E-05 | 3.17E-04 |
| ENSG00000100302 | RASD2      | 2.87E+00 | 8.92E-05 | 3.19E-04 |
| ENSG00000185561 | TLCD2      | 1.10E+00 | 8.92E-05 | 3.19E-04 |
| ENSG00000069667 | RORA       | 2.50E+00 | 8.93E-05 | 3.19E-04 |
| ENSG00000070729 | CNGB1      | 4.57E+00 | 9.10E-05 | 3.25E-04 |
| ENSG00000001460 | STPG1      | 1.51E+00 | 9.16E-05 | 3.27E-04 |
| ENSG00000287413 | AL449363.2 | 4.85E+00 | 9.28E-05 | 3.31E-04 |
| ENSG00000131773 | KHDRBS3    | 1.32E+00 | 9.53E-05 | 3.39E-04 |
| ENSG00000160318 | CLDND2     | 2.59E+00 | 9.55E-05 | 3.40E-04 |
| ENSG00000196581 | AJAP1      | 2.68E+00 | 9.61E-05 | 3.42E-04 |
| ENSG00000124664 | SPDEF      | 3.05E+00 | 9.71E-05 | 3.45E-04 |
| ENSG00000186684 | CYP27C1    | 1.28E+00 | 9.76E-05 | 3.47E-04 |
| ENSG00000268858 | AL118506.1 | 1.29E+00 | 9.82E-05 | 3.49E-04 |
| ENSG00000101405 | OXT        | 4.69E+00 | 9.85E-05 | 3.50E-04 |
| ENSG00000011638 | TMEM159    | 1.38E+00 | 1.01E-04 | 3.59E-04 |
| ENSG00000236751 | LINC01186  | 2.75E+00 | 1.02E-04 | 3.60E-04 |
| ENSG00000267106 | ZNF561-AS1 | 1.33E+00 | 1.02E-04 | 3.60E-04 |
| ENSG00000104722 | NEFM       | 4.19E+00 | 1.02E-04 | 3.61E-04 |
| ENSG00000100298 | APOBEC3H   | 4.43E+00 | 1.02E-04 | 3.62E-04 |
| ENSG00000155962 | CLIC2      | 3.59E+00 | 1.06E-04 | 3.73E-04 |
| ENSG00000082269 | FAM135A    | 1.10E+00 | 1.06E-04 | 3.73E-04 |
| ENSG00000104154 | SLC30A4    | 1.70E+00 | 1.06E-04 | 3.74E-04 |
| ENSG00000262484 | CCER2      | 3.53E+00 | 1.08E-04 | 3.80E-04 |
| ENSG00000141540 | TTYH2      | 1.96E+00 | 1.08E-04 | 3.82E-04 |
| ENSG00000141449 | GREB1L     | 1.21E+00 | 1.09E-04 | 3.84E-04 |
| ENSG00000160336 | ZNF761     | 1.61E+00 | 1.10E-04 | 3.87E-04 |
| ENSG00000155918 | RAET1L     | 3.55E+00 | 1.10E-04 | 3.88E-04 |

|                 |            |          |          |          |
|-----------------|------------|----------|----------|----------|
| ENSG00000205363 | INSYN1     | 1.79E+00 | 1.10E-04 | 3.88E-04 |
| ENSG00000135205 | CCDC146    | 1.93E+00 | 1.13E-04 | 3.98E-04 |
| ENSG00000134571 | MYBPC3     | 4.36E+00 | 1.13E-04 | 3.98E-04 |
| ENSG00000226979 | LTA        | 3.55E+00 | 1.13E-04 | 3.99E-04 |
| ENSG00000236301 | MRGPRG-AS1 | 4.50E+00 | 1.14E-04 | 4.01E-04 |
| ENSG00000173093 | CCDC63     | 4.01E+00 | 1.14E-04 | 4.02E-04 |
| ENSG00000186162 | CIDEC1     | 1.16E+00 | 1.17E-04 | 4.10E-04 |
| ENSG00000164850 | GP1R1      | 3.46E+00 | 1.18E-04 | 4.14E-04 |
| ENSG00000170412 | GPRC5C     | 1.20E+00 | 1.23E-04 | 4.28E-04 |
| ENSG00000150967 | ABCB9      | 1.14E+00 | 1.23E-04 | 4.30E-04 |
| ENSG00000233558 | AL050331.1 | 2.88E+00 | 1.23E-04 | 4.31E-04 |
| ENSG00000183770 | FOXL2      | 2.99E+00 | 1.24E-04 | 4.32E-04 |
| ENSG00000260231 | KDM7A-DT   | 2.14E+00 | 1.24E-04 | 4.32E-04 |
| ENSG00000248538 | AC022784.1 | 4.24E+00 | 1.25E-04 | 4.34E-04 |
| ENSG00000187764 | SEMA4D     | 1.14E+00 | 1.25E-04 | 4.36E-04 |
| ENSG00000171790 | SLFNL1     | 4.44E+00 | 1.26E-04 | 4.39E-04 |
| ENSG00000101695 | RNF125     | 2.25E+00 | 1.29E-04 | 4.50E-04 |
| ENSG00000051009 | FAM160A2   | 1.07E+00 | 1.31E-04 | 4.54E-04 |
| ENSG00000102780 | DGKH       | 1.39E+00 | 1.31E-04 | 4.54E-04 |
| ENSG00000067191 | CACNB1     | 1.52E+00 | 1.31E-04 | 4.56E-04 |
| ENSG00000102935 | ZNF423     | 1.58E+00 | 1.32E-04 | 4.59E-04 |
| ENSG00000196420 | S100A5     | 3.81E+00 | 1.32E-04 | 4.59E-04 |
| ENSG00000204618 | RNF39      | 3.75E+00 | 1.33E-04 | 4.62E-04 |
| ENSG00000211892 | IGHG4      | 4.86E+00 | 1.34E-04 | 4.63E-04 |
| ENSG00000280287 | AC131212.3 | 2.08E+00 | 1.35E-04 | 4.67E-04 |
| ENSG00000196152 | ZNF79      | 1.48E+00 | 1.36E-04 | 4.71E-04 |
| ENSG00000236432 | AC097662.1 | 2.72E+00 | 1.37E-04 | 4.73E-04 |
| ENSG00000169946 | ZFPM2      | 4.34E+00 | 1.40E-04 | 4.85E-04 |
| ENSG00000182621 | PLCB1      | 4.28E+00 | 1.40E-04 | 4.85E-04 |
| ENSG00000285529 | AC016816.1 | 5.01E+00 | 1.40E-04 | 4.85E-04 |
| ENSG00000103852 | TTC23      | 1.09E+00 | 1.41E-04 | 4.86E-04 |
| ENSG00000197847 | SLC22A20P  | 4.08E+00 | 1.42E-04 | 4.91E-04 |
| ENSG00000144218 | AFF3       | 2.58E+00 | 1.44E-04 | 4.98E-04 |
| ENSG00000185640 | KRT79      | 3.41E+00 | 1.45E-04 | 4.99E-04 |
| ENSG00000172828 | CES3       | 3.20E+00 | 1.45E-04 | 5.00E-04 |
| ENSG00000166106 | ADAMTS15   | 1.65E+00 | 1.46E-04 | 5.02E-04 |
| ENSG00000253692 | IGHEP1     | 4.66E+00 | 1.48E-04 | 5.09E-04 |
| ENSG00000133794 | ARNTL      | 1.15E+00 | 1.48E-04 | 5.10E-04 |
| ENSG00000198198 | SZT2       | 1.09E+00 | 1.50E-04 | 5.17E-04 |
| ENSG00000270344 | POC1B-AS1  | 1.81E+00 | 1.56E-04 | 5.34E-04 |

|                 |            |          |          |          |
|-----------------|------------|----------|----------|----------|
| ENSG00000052795 | FNIP2      | 1.05E+00 | 1.56E-04 | 5.36E-04 |
| ENSG00000167614 | TTYH1      | 3.57E+00 | 1.56E-04 | 5.36E-04 |
| ENSG00000154265 | ABCA5      | 1.17E+00 | 1.65E-04 | 5.64E-04 |
| ENSG00000157873 | TNFRSF14   | 2.73E+00 | 1.69E-04 | 5.77E-04 |
| ENSG00000110876 | SELPLG     | 2.35E+00 | 1.69E-04 | 5.77E-04 |
| ENSG00000143556 | S100A7     | 4.31E+00 | 1.69E-04 | 5.78E-04 |
| ENSG00000078814 | MYH7B      | 4.15E+00 | 1.71E-04 | 5.83E-04 |
| ENSG00000160801 | PTH1R      | 2.56E+00 | 1.72E-04 | 5.87E-04 |
| ENSG00000115844 | DLX2       | 1.66E+00 | 1.72E-04 | 5.87E-04 |
| ENSG00000198342 | ZNF442     | 2.14E+00 | 1.73E-04 | 5.90E-04 |
| ENSG00000105516 | DBP        | 1.18E+00 | 1.75E-04 | 5.96E-04 |
| ENSG00000267655 | AC125437.1 | 3.10E+00 | 1.75E-04 | 5.97E-04 |
| ENSG00000062038 | CDH3       | 1.78E+00 | 1.78E-04 | 6.06E-04 |
| ENSG00000197283 | SYNGAP1    | 1.75E+00 | 1.79E-04 | 6.08E-04 |
| ENSG00000259904 | ACTG1P15   | 4.53E+00 | 1.81E-04 | 6.15E-04 |
| ENSG00000173805 | HAP1       | 1.60E+00 | 1.81E-04 | 6.16E-04 |
| ENSG00000116774 | OLFML3     | 3.19E+00 | 1.83E-04 | 6.22E-04 |
| ENSG00000166348 | USP54      | 1.28E+00 | 1.83E-04 | 6.23E-04 |
| ENSG00000149781 | FERMT3     | 2.50E+00 | 1.86E-04 | 6.32E-04 |
| ENSG00000259374 | NDUFB4P11  | 4.55E+00 | 1.87E-04 | 6.33E-04 |
| ENSG00000250041 | AC069360.1 | 3.37E+00 | 1.88E-04 | 6.36E-04 |
| ENSG00000197471 | SPN        | 3.85E+00 | 1.89E-04 | 6.41E-04 |
| ENSG00000135144 | DTX1       | 4.37E+00 | 1.93E-04 | 6.51E-04 |
| ENSG00000205922 | ONECUT3    | 4.48E+00 | 1.93E-04 | 6.53E-04 |
| ENSG00000132854 | KANK4      | 1.85E+00 | 1.95E-04 | 6.57E-04 |
| ENSG00000279035 | AC022211.4 | 3.75E+00 | 1.96E-04 | 6.60E-04 |
| ENSG00000272686 | AC006333.2 | 1.82E+00 | 1.96E-04 | 6.62E-04 |
| ENSG00000230453 | ANKRD18B   | 1.10E+00 | 1.98E-04 | 6.66E-04 |
| ENSG00000215458 | AATBC      | 4.17E+00 | 1.99E-04 | 6.70E-04 |
| ENSG00000023892 | DEF6       | 1.10E+00 | 2.01E-04 | 6.76E-04 |
| ENSG00000285848 | AC025280.3 | 5.10E+00 | 2.03E-04 | 6.83E-04 |
| ENSG00000174628 | IQCK       | 1.27E+00 | 2.03E-04 | 6.84E-04 |
| ENSG00000106078 | COBL       | 3.47E+00 | 2.06E-04 | 6.92E-04 |
| ENSG00000158023 | WDR66      | 2.59E+00 | 2.08E-04 | 6.96E-04 |
| ENSG00000135643 | KCNMB4     | 3.37E+00 | 2.11E-04 | 7.06E-04 |
| ENSG00000233930 | KRTAP5-AS1 | 3.51E+00 | 2.11E-04 | 7.06E-04 |
| ENSG00000164124 | TMEM144    | 1.70E+00 | 2.12E-04 | 7.09E-04 |
| ENSG00000106948 | AKNA       | 1.41E+00 | 2.13E-04 | 7.14E-04 |
| ENSG00000172508 | CARNS1     | 3.76E+00 | 2.16E-04 | 7.23E-04 |
| ENSG00000008516 | MMP25      | 1.91E+00 | 2.17E-04 | 7.25E-04 |

|                 |            |          |          |          |
|-----------------|------------|----------|----------|----------|
| ENSG00000188508 | KRTDAP     | 4.48E+00 | 2.20E-04 | 7.34E-04 |
| ENSG00000146700 | SSC4D      | 3.43E+00 | 2.20E-04 | 7.35E-04 |
| ENSG00000173269 | MMRN2      | 3.51E+00 | 2.25E-04 | 7.50E-04 |
| ENSG00000237515 | SHISA9     | 2.24E+00 | 2.29E-04 | 7.63E-04 |
| ENSG00000279692 | AC110285.6 | 1.56E+00 | 2.31E-04 | 7.67E-04 |
| ENSG00000167333 | TRIM68     | 1.10E+00 | 2.34E-04 | 7.79E-04 |
| ENSG00000144596 | GRIP2      | 3.34E+00 | 2.36E-04 | 7.83E-04 |
| ENSG00000163803 | PLB1       | 3.23E+00 | 2.37E-04 | 7.87E-04 |
| ENSG00000177181 | RIMKLA     | 2.85E+00 | 2.40E-04 | 7.97E-04 |
| ENSG00000100336 | APOL4      | 3.72E+00 | 2.41E-04 | 7.97E-04 |
| ENSG00000278993 | AC002350.2 | 3.39E+00 | 2.46E-04 | 8.13E-04 |
| ENSG00000261040 | WFDC21P    | 1.50E+00 | 2.46E-04 | 8.14E-04 |
| ENSG00000261609 | GAN        | 1.01E+00 | 2.53E-04 | 8.35E-04 |
| ENSG00000196220 | SRGAP3     | 1.64E+00 | 2.54E-04 | 8.39E-04 |
| ENSG00000168079 | SCARA5     | 4.96E+00 | 2.54E-04 | 8.39E-04 |
| ENSG00000085871 | MGST2      | 1.21E+00 | 2.54E-04 | 8.40E-04 |
| ENSG00000173011 | TADA2B     | 1.04E+00 | 2.55E-04 | 8.41E-04 |
| ENSG00000168453 | HR         | 1.03E+00 | 2.61E-04 | 8.60E-04 |
| ENSG00000164620 | RELL2      | 1.20E+00 | 2.64E-04 | 8.71E-04 |
| ENSG00000250251 | PKD1P6     | 1.36E+00 | 2.65E-04 | 8.72E-04 |
| ENSG00000107485 | GATA3      | 1.42E+00 | 2.67E-04 | 8.77E-04 |
| ENSG00000138111 | MFSD13A    | 1.67E+00 | 2.69E-04 | 8.85E-04 |
| ENSG00000171045 | TSNARE1    | 1.79E+00 | 2.82E-04 | 9.23E-04 |
| ENSG00000248334 | WHAMMP2    | 1.81E+00 | 2.85E-04 | 9.32E-04 |
| ENSG00000260807 | AC009041.2 | 4.23E+00 | 2.87E-04 | 9.38E-04 |
| ENSG00000160401 | CFAP157    | 3.50E+00 | 2.88E-04 | 9.42E-04 |
| ENSG00000225978 | HAR1A      | 2.86E+00 | 2.88E-04 | 9.43E-04 |
| ENSG00000165810 | BTNL9      | 3.20E+00 | 2.88E-04 | 9.43E-04 |
| ENSG00000160161 | CILP2      | 1.42E+00 | 2.91E-04 | 9.50E-04 |
| ENSG00000091129 | NRCAM      | 3.49E+00 | 2.92E-04 | 9.52E-04 |
| ENSG00000186442 | KRT3       | 3.17E+00 | 2.92E-04 | 9.52E-04 |
| ENSG00000106086 | PLEKHA8    | 1.09E+00 | 2.94E-04 | 9.60E-04 |
| ENSG00000105971 | CAV2       | 1.02E+00 | 2.96E-04 | 9.64E-04 |
| ENSG00000164120 | HPGD       | 3.34E+00 | 3.02E-04 | 9.83E-04 |
| ENSG00000213638 | ADAT3      | 3.04E+00 | 3.02E-04 | 9.83E-04 |
| ENSG00000105143 | SLC1A6     | 4.40E+00 | 3.03E-04 | 9.87E-04 |
| ENSG00000130300 | PLVAP      | 4.14E+00 | 3.03E-04 | 9.87E-04 |
| ENSG00000141404 | GNAL       | 1.18E+00 | 3.05E-04 | 9.93E-04 |
| ENSG00000268583 | AC011466.1 | 3.30E+00 | 3.06E-04 | 9.96E-04 |
| ENSG00000117115 | PADI2      | 3.37E+00 | 3.07E-04 | 9.97E-04 |

|                 |             |          |          |          |
|-----------------|-------------|----------|----------|----------|
| ENSG00000272636 | DOC2B       | 3.41E+00 | 3.08E-04 | 1.00E-03 |
| ENSG00000258405 | ZNF578      | 3.93E+00 | 3.11E-04 | 1.01E-03 |
| ENSG00000155367 | PPM1J       | 3.41E+00 | 3.13E-04 | 1.01E-03 |
| ENSG00000236242 | MYO16-AS1   | 4.42E+00 | 3.15E-04 | 1.02E-03 |
| ENSG00000272836 | AL022328.1  | 3.71E+00 | 3.19E-04 | 1.03E-03 |
| ENSG00000182165 | TP53TG1     | 1.15E+00 | 3.22E-04 | 1.05E-03 |
| ENSG00000224153 | LINC02054   | 4.27E+00 | 3.23E-04 | 1.05E-03 |
| ENSG00000185338 | SOCS1       | 1.01E+00 | 3.25E-04 | 1.05E-03 |
| ENSG00000041353 | RAB27B      | 1.82E+00 | 3.29E-04 | 1.07E-03 |
| ENSG00000137628 | DDX60       | 1.14E+00 | 3.33E-04 | 1.08E-03 |
| ENSG00000182557 | SPNS3       | 4.39E+00 | 3.34E-04 | 1.08E-03 |
| ENSG00000101638 | ST8SIA5     | 3.88E+00 | 3.41E-04 | 1.10E-03 |
| ENSG00000170477 | KRT4        | 4.53E+00 | 3.43E-04 | 1.11E-03 |
| ENSG00000078081 | LAMP3       | 1.95E+00 | 3.45E-04 | 1.11E-03 |
| ENSG00000170909 | OSCAR       | 3.30E+00 | 3.46E-04 | 1.12E-03 |
| ENSG00000116833 | NR5A2       | 4.02E+00 | 3.47E-04 | 1.12E-03 |
| ENSG00000144119 | C1QL2       | 4.34E+00 | 3.48E-04 | 1.12E-03 |
| ENSG00000167984 | NLRC3       | 3.90E+00 | 3.51E-04 | 1.13E-03 |
| ENSG00000181135 | ZNF707      | 1.20E+00 | 3.54E-04 | 1.14E-03 |
| ENSG00000167654 | ATCAY       | 3.14E+00 | 3.56E-04 | 1.14E-03 |
| ENSG00000002746 | HECW1       | 2.00E+00 | 3.68E-04 | 1.18E-03 |
| ENSG00000198720 | ANKRD13B    | 1.17E+00 | 3.72E-04 | 1.19E-03 |
| ENSG00000198915 | RASGEF1A    | 4.69E+00 | 3.75E-04 | 1.20E-03 |
| ENSG00000188549 | CCDC9B      | 1.21E+00 | 3.79E-04 | 1.21E-03 |
| ENSG00000129993 | CBFA2T3     | 4.29E+00 | 3.82E-04 | 1.22E-03 |
| ENSG00000265096 | C1QTNF1-AS1 | 2.31E+00 | 3.84E-04 | 1.22E-03 |
| ENSG00000169239 | CA5B        | 1.11E+00 | 3.85E-04 | 1.23E-03 |
| ENSG00000162747 | FCGR3B      | 4.42E+00 | 3.87E-04 | 1.23E-03 |
| ENSG00000137648 | TMPRSS4     | 4.39E+00 | 3.91E-04 | 1.25E-03 |
| ENSG00000232453 | LINC02777   | 3.97E+00 | 3.94E-04 | 1.26E-03 |
| ENSG00000245848 | CEBPA       | 1.59E+00 | 3.99E-04 | 1.27E-03 |
| ENSG00000119547 | ONECUT2     | 1.60E+00 | 4.01E-04 | 1.27E-03 |
| ENSG00000102218 | RP2         | 1.00E+00 | 4.12E-04 | 1.31E-03 |
| ENSG00000137460 | FHDC1       | 1.01E+00 | 4.15E-04 | 1.32E-03 |
| ENSG00000241170 | AP001992.1  | 2.43E+00 | 4.15E-04 | 1.32E-03 |
| ENSG00000160973 | FOXH1       | 4.47E+00 | 4.17E-04 | 1.32E-03 |
| ENSG00000125798 | FOXA2       | 2.85E+00 | 4.18E-04 | 1.32E-03 |
| ENSG00000116544 | DLGAP3      | 3.49E+00 | 4.18E-04 | 1.33E-03 |
| ENSG00000232237 | ASCL5       | 4.26E+00 | 4.27E-04 | 1.35E-03 |
| ENSG00000066230 | SLC9A3      | 4.48E+00 | 4.28E-04 | 1.35E-03 |

|                 |            |          |          |          |
|-----------------|------------|----------|----------|----------|
| ENSG00000184916 | JAG2       | 1.51E+00 | 4.29E-04 | 1.36E-03 |
| ENSG00000259153 | AC004816.1 | 1.04E+00 | 4.31E-04 | 1.36E-03 |
| ENSG00000059915 | PSD        | 1.51E+00 | 4.33E-04 | 1.37E-03 |
| ENSG00000234546 | LNCTAM34A  | 2.46E+00 | 4.38E-04 | 1.38E-03 |
| ENSG00000237399 | PITRM1-AS1 | 4.07E+00 | 4.39E-04 | 1.38E-03 |
| ENSG00000197852 | INKA2      | 1.09E+00 | 4.40E-04 | 1.39E-03 |
| ENSG00000104848 | KCNA7      | 3.98E+00 | 4.40E-04 | 1.39E-03 |
| ENSG00000162643 | WDR63      | 2.13E+00 | 4.41E-04 | 1.39E-03 |
| ENSG00000248968 | AC012640.1 | 2.42E+00 | 4.57E-04 | 1.44E-03 |
| ENSG00000180438 | TPRXL      | 4.66E+00 | 4.58E-04 | 1.44E-03 |
| ENSG00000196296 | ATP2A1     | 1.91E+00 | 4.60E-04 | 1.44E-03 |
| ENSG00000183647 | ZNF530     | 1.10E+00 | 4.60E-04 | 1.44E-03 |
| ENSG00000244310 | AC093904.3 | 4.08E+00 | 4.60E-04 | 1.44E-03 |
| ENSG00000156384 | SFR1       | 1.42E+00 | 4.66E-04 | 1.46E-03 |
| ENSG00000197568 | HHLA3      | 1.43E+00 | 4.72E-04 | 1.48E-03 |
| ENSG00000206432 | TMEM200C   | 3.70E+00 | 4.72E-04 | 1.48E-03 |
| ENSG00000247317 | LY6E-DT    | 2.74E+00 | 4.74E-04 | 1.48E-03 |
| ENSG00000196358 | NTNG2      | 3.58E+00 | 4.76E-04 | 1.49E-03 |
| ENSG00000023839 | ABCC2      | 2.16E+00 | 4.79E-04 | 1.50E-03 |
| ENSG00000054690 | PLEKHH1    | 2.46E+00 | 4.80E-04 | 1.50E-03 |
| ENSG00000205903 | ZNF316     | 1.05E+00 | 4.82E-04 | 1.50E-03 |
| ENSG00000182484 | WASH6P     | 1.76E+00 | 4.84E-04 | 1.51E-03 |
| ENSG00000163497 | FEV        | 3.65E+00 | 4.86E-04 | 1.52E-03 |
| ENSG00000110436 | SLC1A2     | 4.16E+00 | 4.89E-04 | 1.52E-03 |
| ENSG00000246273 | SBF2-AS1   | 2.06E+00 | 4.90E-04 | 1.53E-03 |
| ENSG00000115112 | TFCP2L1    | 3.10E+00 | 4.90E-04 | 1.53E-03 |
| ENSG00000257702 | LBX2-AS1   | 3.49E+00 | 4.95E-04 | 1.54E-03 |
| ENSG00000157087 | ATP2B2     | 4.32E+00 | 4.97E-04 | 1.55E-03 |
| ENSG00000239998 | LILRA2     | 4.26E+00 | 4.97E-04 | 1.55E-03 |
| ENSG00000226742 | HSBP1L1    | 1.42E+00 | 5.02E-04 | 1.56E-03 |
| ENSG00000255100 | AP003119.2 | 3.06E+00 | 5.05E-04 | 1.57E-03 |
| ENSG00000204666 | AC010624.1 | 3.30E+00 | 5.11E-04 | 1.59E-03 |
| ENSG00000145708 | CRHBP      | 3.49E+00 | 5.19E-04 | 1.61E-03 |
| ENSG00000279571 | AL162426.1 | 3.65E+00 | 5.21E-04 | 1.61E-03 |
| ENSG00000226281 | AL031123.1 | 4.50E+00 | 5.21E-04 | 1.61E-03 |
| ENSG00000170537 | TMC7       | 2.14E+00 | 5.21E-04 | 1.61E-03 |
| ENSG00000143630 | HCN3       | 1.55E+00 | 5.21E-04 | 1.62E-03 |
| ENSG00000243660 | ZNF487     | 1.78E+00 | 5.33E-04 | 1.65E-03 |
| ENSG00000144488 | ESPNL      | 3.35E+00 | 5.40E-04 | 1.67E-03 |
| ENSG00000167799 | NUDT8      | 1.43E+00 | 5.44E-04 | 1.68E-03 |



|                 |            |          |          |          |
|-----------------|------------|----------|----------|----------|
| ENSG00000011201 | ANOS1      | 1.59E+00 | 5.49E-04 | 1.69E-03 |
| ENSG00000273174 | AC108673.2 | 2.25E+00 | 5.53E-04 | 1.71E-03 |
| ENSG00000286138 | AC010336.8 | 2.97E+00 | 5.53E-04 | 1.71E-03 |
| ENSG00000287677 | AC025839.1 | 4.19E+00 | 5.54E-04 | 1.71E-03 |
| ENSG00000213199 | ASIC3      | 2.12E+00 | 5.58E-04 | 1.72E-03 |
| ENSG00000197406 | DIO3       | 3.93E+00 | 5.62E-04 | 1.73E-03 |
| ENSG00000100968 | NFATC4     | 3.94E+00 | 5.67E-04 | 1.74E-03 |
| ENSG00000111863 | ADTRP      | 2.46E+00 | 5.71E-04 | 1.76E-03 |
| ENSG00000196754 | S100A2     | 1.53E+00 | 5.72E-04 | 1.76E-03 |
| ENSG00000047056 | WDR37      | 1.31E+00 | 5.77E-04 | 1.78E-03 |
| ENSG00000166188 | ZNF319     | 1.35E+00 | 5.79E-04 | 1.78E-03 |
| ENSG00000282961 | PRNCR1     | 3.01E+00 | 5.91E-04 | 1.81E-03 |
| ENSG00000212864 | RNF208     | 1.75E+00 | 5.93E-04 | 1.82E-03 |
| ENSG00000181016 | LSMEM1     | 2.22E+00 | 6.01E-04 | 1.84E-03 |
| ENSG00000240889 | NDUFB2-AS1 | 1.67E+00 | 6.07E-04 | 1.86E-03 |
| ENSG00000162341 | TPCN2      | 1.42E+00 | 6.08E-04 | 1.86E-03 |
| ENSG00000270640 | AC104695.4 | 1.93E+00 | 6.15E-04 | 1.88E-03 |
| ENSG00000165233 | CARD19     | 1.09E+00 | 6.17E-04 | 1.89E-03 |
| ENSG00000262370 | AC108134.3 | 5.45E+00 | 6.19E-04 | 1.89E-03 |
| ENSG00000065665 | SEC61A2    | 1.07E+00 | 6.27E-04 | 1.91E-03 |
| ENSG00000172663 | TMEM134    | 1.01E+00 | 6.29E-04 | 1.92E-03 |
| ENSG00000175294 | CATSPER1   | 2.29E+00 | 6.29E-04 | 1.92E-03 |
| ENSG00000204385 | SLC44A4    | 4.21E+00 | 6.34E-04 | 1.94E-03 |
| ENSG00000166888 | STAT6      | 3.36E+00 | 6.36E-04 | 1.94E-03 |
| ENSG00000231086 | TSSK1A     | 4.20E+00 | 6.38E-04 | 1.95E-03 |
| ENSG00000142538 | PTH2       | 4.19E+00 | 6.39E-04 | 1.95E-03 |
| ENSG00000271009 | AC116667.1 | 1.97E+00 | 6.42E-04 | 1.96E-03 |
| ENSG00000166257 | SCN3B      | 2.46E+00 | 6.54E-04 | 1.99E-03 |
| ENSG00000228793 | AL033523.1 | 2.09E+00 | 6.59E-04 | 2.00E-03 |
| ENSG00000160588 | MPZL3      | 1.23E+00 | 6.60E-04 | 2.01E-03 |
| ENSG00000140396 | NCOA2      | 1.04E+00 | 6.66E-04 | 2.02E-03 |
| ENSG00000179564 | LSMEM2     | 4.52E+00 | 6.71E-04 | 2.04E-03 |
| ENSG00000279140 | AL590326.1 | 1.68E+00 | 6.75E-04 | 2.05E-03 |
| ENSG00000165238 | WNK2       | 1.69E+00 | 6.76E-04 | 2.05E-03 |
| ENSG00000140795 | MYLK3      | 4.14E+00 | 6.86E-04 | 2.08E-03 |
| ENSG00000187122 | SLIT1      | 4.10E+00 | 6.86E-04 | 2.08E-03 |
| ENSG00000108342 | CSF3       | 2.74E+00 | 6.91E-04 | 2.09E-03 |
| ENSG00000197993 | KEL        | 4.03E+00 | 6.95E-04 | 2.10E-03 |
| ENSG00000253802 | SIRLNT     | 1.20E+00 | 7.03E-04 | 2.13E-03 |
| ENSG00000148408 | CACNA1B    | 4.20E+00 | 7.11E-04 | 2.15E-03 |

|                 |            |          |          |          |
|-----------------|------------|----------|----------|----------|
| ENSG00000131697 | NPHP4      | 1.02E+00 | 7.12E-04 | 2.15E-03 |
| ENSG00000260401 | AP002761.4 | 4.34E+00 | 7.12E-04 | 2.15E-03 |
| ENSG00000198169 | ZNF251     | 1.18E+00 | 7.18E-04 | 2.17E-03 |
| ENSG00000177614 | PGBD5      | 3.63E+00 | 7.20E-04 | 2.17E-03 |
| ENSG00000225720 | AL031846.1 | 3.90E+00 | 7.29E-04 | 2.20E-03 |
| ENSG00000166387 | PPFIBP2    | 2.83E+00 | 7.31E-04 | 2.20E-03 |
| ENSG00000155465 | SLC7A7     | 1.61E+00 | 7.34E-04 | 2.21E-03 |
| ENSG00000101194 | SLC17A9    | 3.94E+00 | 7.40E-04 | 2.23E-03 |
| ENSG00000255200 | PGAM1P8    | 2.65E+00 | 7.47E-04 | 2.25E-03 |
| ENSG00000119915 | ELOVL3     | 4.09E+00 | 7.52E-04 | 2.26E-03 |
| ENSG00000176956 | LY6H       | 4.96E+00 | 7.64E-04 | 2.30E-03 |
| ENSG00000262898 | AC139099.2 | 4.01E+00 | 7.73E-04 | 2.32E-03 |
| ENSG00000135439 | AGAP2      | 2.76E+00 | 7.74E-04 | 2.32E-03 |
| ENSG00000188755 | TBC1D3P2   | 3.95E+00 | 7.75E-04 | 2.32E-03 |
| ENSG00000122733 | PHF24      | 3.96E+00 | 7.85E-04 | 2.35E-03 |
| ENSG00000118960 | HS1BP3     | 1.30E+00 | 7.88E-04 | 2.36E-03 |
| ENSG00000273204 | AC104506.1 | 2.47E+00 | 7.90E-04 | 2.36E-03 |
| ENSG00000285188 | AC008397.2 | 3.00E+00 | 7.93E-04 | 2.37E-03 |
| ENSG00000187796 | CARD9      | 2.61E+00 | 8.02E-04 | 2.40E-03 |
| ENSG00000197614 | MFAP5      | 4.17E+00 | 8.05E-04 | 2.40E-03 |
| ENSG00000272994 | AC012360.3 | 1.13E+00 | 8.09E-04 | 2.41E-03 |
| ENSG00000162641 | AKNAD1     | 2.90E+00 | 8.11E-04 | 2.42E-03 |
| ENSG00000163792 | TCF23      | 4.17E+00 | 8.16E-04 | 2.43E-03 |
| ENSG00000121454 | LHX4       | 2.78E+00 | 8.18E-04 | 2.44E-03 |
| ENSG00000204498 | NFKBIL1    | 1.34E+00 | 8.20E-04 | 2.44E-03 |
| ENSG00000214049 | UCA1       | 4.02E+00 | 8.28E-04 | 2.47E-03 |
| ENSG00000048707 | VPS13D     | 1.05E+00 | 8.31E-04 | 2.47E-03 |
| ENSG00000139192 | TAPBPL     | 2.00E+00 | 8.40E-04 | 2.50E-03 |
| ENSG00000085465 | OVGP1      | 3.00E+00 | 8.41E-04 | 2.50E-03 |
| ENSG00000196357 | ZNF565     | 1.50E+00 | 8.41E-04 | 2.50E-03 |
| ENSG00000172985 | SH3RF3     | 3.49E+00 | 8.45E-04 | 2.51E-03 |
| ENSG00000167711 | SERPINF2   | 2.93E+00 | 8.48E-04 | 2.52E-03 |
| ENSG00000149295 | DRD2       | 2.75E+00 | 8.53E-04 | 2.53E-03 |
| ENSG00000168490 | PHYHIP     | 1.63E+00 | 8.76E-04 | 2.60E-03 |
| ENSG00000278920 | AC005005.4 | 4.00E+00 | 8.86E-04 | 2.62E-03 |
| ENSG00000100150 | DEPDC5     | 1.12E+00 | 8.87E-04 | 2.62E-03 |
| ENSG00000279161 | AC093503.3 | 3.94E+00 | 8.90E-04 | 2.63E-03 |
| ENSG00000129654 | FOXJ1      | 2.65E+00 | 8.95E-04 | 2.65E-03 |
| ENSG00000260103 | AC012435.2 | 2.83E+00 | 9.02E-04 | 2.67E-03 |
| ENSG00000261239 | ANKRD26P1  | 3.70E+00 | 9.06E-04 | 2.68E-03 |

|                 |            |          |          |          |
|-----------------|------------|----------|----------|----------|
| ENSG00000169509 | CRCT1      | 4.31E+00 | 9.19E-04 | 2.71E-03 |
| ENSG00000130783 | CCDC62     | 3.72E+00 | 9.27E-04 | 2.74E-03 |
| ENSG00000237596 | AL138828.1 | 4.22E+00 | 9.30E-04 | 2.74E-03 |
| ENSG00000187123 | LYPD6      | 2.34E+00 | 9.44E-04 | 2.78E-03 |
| ENSG00000135094 | SDS        | 3.83E+00 | 9.46E-04 | 2.79E-03 |
| ENSG00000133392 | MYH11      | 4.00E+00 | 9.54E-04 | 2.81E-03 |
| ENSG00000113749 | HRH2       | 3.23E+00 | 9.57E-04 | 2.82E-03 |
| ENSG00000168481 | LGI3       | 2.62E+00 | 9.58E-04 | 2.82E-03 |
| ENSG00000240891 | PLCXD2     | 1.77E+00 | 9.59E-04 | 2.82E-03 |
| ENSG00000197653 | DNAH10     | 3.79E+00 | 9.63E-04 | 2.83E-03 |
| ENSG00000180448 | ARHGAP45   | 1.59E+00 | 9.67E-04 | 2.84E-03 |
| ENSG00000182885 | ADGRG3     | 2.95E+00 | 9.84E-04 | 2.89E-03 |
| ENSG00000104133 | SPG11      | 1.00E+00 | 9.88E-04 | 2.90E-03 |
| ENSG00000173991 | TCAP       | 1.93E+00 | 9.91E-04 | 2.91E-03 |
| ENSG00000111249 | CUX2       | 4.15E+00 | 9.93E-04 | 2.91E-03 |
| ENSG00000212464 | SNORA12    | 2.38E+00 | 1.01E-03 | 2.95E-03 |
| ENSG00000118402 | ELOVL4     | 1.12E+00 | 1.01E-03 | 2.96E-03 |
| ENSG00000182600 | SNORC      | 2.39E+00 | 1.03E-03 | 3.01E-03 |
| ENSG00000068028 | RASSF1     | 1.01E+00 | 1.03E-03 | 3.02E-03 |
| ENSG00000143554 | SLC27A3    | 1.43E+00 | 1.04E-03 | 3.06E-03 |
| ENSG00000180769 | WDFY3-AS2  | 1.45E+00 | 1.05E-03 | 3.08E-03 |
| ENSG00000135709 | KIAA0513   | 1.27E+00 | 1.07E-03 | 3.13E-03 |
| ENSG00000258441 | LINC00641  | 1.53E+00 | 1.07E-03 | 3.13E-03 |
| ENSG00000172349 | IL16       | 4.24E+00 | 1.09E-03 | 3.18E-03 |
| ENSG00000250271 | AC068647.2 | 3.02E+00 | 1.09E-03 | 3.18E-03 |
| ENSG00000107859 | PITX3      | 3.40E+00 | 1.09E-03 | 3.18E-03 |
| ENSG00000119508 | NR4A3      | 1.68E+00 | 1.09E-03 | 3.18E-03 |
| ENSG00000267577 | AC010327.4 | 4.73E+00 | 1.10E-03 | 3.21E-03 |
| ENSG00000129595 | EPB41L4A   | 4.09E+00 | 1.10E-03 | 3.21E-03 |
| ENSG00000176809 | LRRC37A3   | 2.18E+00 | 1.11E-03 | 3.24E-03 |
| ENSG00000143774 | GUK1       | 1.04E+00 | 1.13E-03 | 3.28E-03 |
| ENSG00000134917 | ADAMTS8    | 3.96E+00 | 1.13E-03 | 3.29E-03 |
| ENSG00000074855 | ANO8       | 1.53E+00 | 1.14E-03 | 3.30E-03 |
| ENSG00000130829 | DUSP9      | 1.06E+00 | 1.15E-03 | 3.35E-03 |
| ENSG00000279491 | AP003733.3 | 3.45E+00 | 1.16E-03 | 3.36E-03 |
| ENSG00000164142 | FAM160A1   | 1.48E+00 | 1.16E-03 | 3.37E-03 |
| ENSG00000163536 | SERPINI1   | 2.34E+00 | 1.17E-03 | 3.40E-03 |
| ENSG00000169682 | SPNS1      | 2.88E+00 | 1.17E-03 | 3.40E-03 |
| ENSG00000224903 | AC005534.1 | 3.50E+00 | 1.18E-03 | 3.41E-03 |
| ENSG00000144681 | STAC       | 2.76E+00 | 1.19E-03 | 3.43E-03 |

|                 |             |          |          |          |
|-----------------|-------------|----------|----------|----------|
| ENSG00000146707 | POMZP3      | 1.20E+00 | 1.20E-03 | 3.47E-03 |
| ENSG00000171695 | LKAAEAR1    | 1.94E+00 | 1.20E-03 | 3.47E-03 |
| ENSG00000136237 | RAPGEF5     | 1.90E+00 | 1.21E-03 | 3.49E-03 |
| ENSG00000183034 | OTOP2       | 4.29E+00 | 1.22E-03 | 3.52E-03 |
| ENSG00000049246 | PER3        | 1.20E+00 | 1.23E-03 | 3.56E-03 |
| ENSG00000105737 | GRIK5       | 2.59E+00 | 1.25E-03 | 3.59E-03 |
| ENSG00000204936 | CD177       | 3.02E+00 | 1.25E-03 | 3.59E-03 |
| ENSG00000226251 | LINC02608   | 3.86E+00 | 1.25E-03 | 3.60E-03 |
| ENSG00000248429 | FAM198B-AS1 | 3.00E+00 | 1.27E-03 | 3.66E-03 |
| ENSG00000227748 | AL138916.1  | 4.07E+00 | 1.27E-03 | 3.66E-03 |
| ENSG00000143429 | LSP1P4      | 1.23E+00 | 1.27E-03 | 3.67E-03 |
| ENSG00000225828 | FAM229A     | 1.83E+00 | 1.31E-03 | 3.75E-03 |
| ENSG00000132196 | HSD17B7     | 1.13E+00 | 1.31E-03 | 3.75E-03 |
| ENSG00000189221 | MAOA        | 1.41E+00 | 1.31E-03 | 3.75E-03 |
| ENSG00000116741 | RGS2        | 3.79E+00 | 1.31E-03 | 3.77E-03 |
| ENSG00000104983 | CCDC61      | 1.39E+00 | 1.32E-03 | 3.77E-03 |
| ENSG00000186919 | ZACN        | 4.05E+00 | 1.32E-03 | 3.79E-03 |
| ENSG00000224330 | AC005019.2  | 4.46E+00 | 1.33E-03 | 3.80E-03 |
| ENSG00000197483 | ZNF628      | 1.02E+00 | 1.33E-03 | 3.80E-03 |
| ENSG00000140092 | FBLN5       | 3.24E+00 | 1.34E-03 | 3.84E-03 |
| ENSG00000117266 | CDK18       | 1.19E+00 | 1.37E-03 | 3.92E-03 |
| ENSG00000205592 | MUC19       | 3.32E+00 | 1.38E-03 | 3.95E-03 |
| ENSG00000186283 | TOR3A       | 1.15E+00 | 1.39E-03 | 3.97E-03 |
| ENSG00000163624 | CDS1        | 2.24E+00 | 1.41E-03 | 4.02E-03 |
| ENSG00000273230 | AC102953.2  | 1.26E+00 | 1.42E-03 | 4.04E-03 |
| ENSG00000187268 | FAM9C       | 4.47E+00 | 1.42E-03 | 4.05E-03 |
| ENSG00000203900 | AL121827.1  | 3.72E+00 | 1.42E-03 | 4.05E-03 |
| ENSG00000149043 | SYT8        | 3.96E+00 | 1.43E-03 | 4.07E-03 |
| ENSG00000280011 | AL031595.2  | 3.61E+00 | 1.44E-03 | 4.09E-03 |
| ENSG00000198346 | ZNF813      | 1.27E+00 | 1.44E-03 | 4.09E-03 |
| ENSG00000095713 | CRTAC1      | 3.44E+00 | 1.45E-03 | 4.11E-03 |
| ENSG00000187134 | AKR1C1      | 2.69E+00 | 1.45E-03 | 4.13E-03 |
| ENSG00000177432 | NAP1L5      | 1.27E+00 | 1.45E-03 | 4.13E-03 |
| ENSG00000074317 | SNCB        | 1.59E+00 | 1.46E-03 | 4.14E-03 |
| ENSG00000224621 | AL451042.1  | 3.53E+00 | 1.47E-03 | 4.18E-03 |
| ENSG00000053702 | NRIP2       | 3.70E+00 | 1.48E-03 | 4.21E-03 |
| ENSG00000140557 | ST8SIA2     | 4.63E+00 | 1.49E-03 | 4.22E-03 |
| ENSG00000095587 | TLL2        | 3.43E+00 | 1.50E-03 | 4.26E-03 |
| ENSG00000285906 | AC083855.2  | 3.74E+00 | 1.51E-03 | 4.27E-03 |
| ENSG00000274828 | AC068473.5  | 1.45E+00 | 1.51E-03 | 4.27E-03 |

|                 |             |          |          |          |
|-----------------|-------------|----------|----------|----------|
| ENSG00000233554 | B4GALT1-AS1 | 3.11E+00 | 1.52E-03 | 4.29E-03 |
| ENSG00000168071 | CCDC88B     | 1.77E+00 | 1.53E-03 | 4.32E-03 |
| ENSG00000100319 | ZMAT5       | 1.19E+00 | 1.53E-03 | 4.32E-03 |
| ENSG00000177464 | GPR4        | 2.05E+00 | 1.54E-03 | 4.34E-03 |
| ENSG00000107968 | MAP3K8      | 1.70E+00 | 1.56E-03 | 4.40E-03 |
| ENSG00000166736 | HTR3A       | 4.40E+00 | 1.57E-03 | 4.41E-03 |
| ENSG00000111261 | MANSC1      | 2.12E+00 | 1.58E-03 | 4.46E-03 |
| ENSG00000146856 | AGBL3       | 1.79E+00 | 1.59E-03 | 4.47E-03 |
| ENSG00000184347 | SLIT3       | 2.52E+00 | 1.61E-03 | 4.52E-03 |
| ENSG00000258839 | MC1R        | 1.58E+00 | 1.61E-03 | 4.53E-03 |
| ENSG00000176473 | WDR25       | 1.11E+00 | 1.61E-03 | 4.53E-03 |
| ENSG00000176771 | NCKAP5      | 1.46E+00 | 1.62E-03 | 4.55E-03 |
| ENSG00000143595 | AQP10       | 4.03E+00 | 1.65E-03 | 4.64E-03 |
| ENSG00000118308 | LRMP        | 3.61E+00 | 1.67E-03 | 4.67E-03 |
| ENSG00000105655 | ISYNA1      | 1.13E+00 | 1.67E-03 | 4.68E-03 |
| ENSG00000172361 | CFAP53      | 2.89E+00 | 1.67E-03 | 4.68E-03 |
| ENSG00000099840 | IZUMO4      | 2.78E+00 | 1.68E-03 | 4.70E-03 |
| ENSG00000271882 | AP001330.4  | 3.07E+00 | 1.68E-03 | 4.72E-03 |
| ENSG00000139890 | REM2        | 2.41E+00 | 1.69E-03 | 4.74E-03 |
| ENSG00000272115 | AC233992.3  | 3.76E+00 | 1.71E-03 | 4.79E-03 |
| ENSG00000267419 | AC011477.1  | 1.90E+00 | 1.72E-03 | 4.82E-03 |
| ENSG00000287200 | AC022506.2  | 3.39E+00 | 1.72E-03 | 4.83E-03 |
| ENSG00000129214 | SHBG        | 2.66E+00 | 1.73E-03 | 4.84E-03 |
| ENSG00000074660 | SCARF1      | 2.54E+00 | 1.77E-03 | 4.95E-03 |
| ENSG00000259820 | AC083843.3  | 1.26E+00 | 1.77E-03 | 4.96E-03 |
| ENSG00000168781 | PPIP5K1     | 1.62E+00 | 1.81E-03 | 5.05E-03 |
| ENSG00000107954 | NEURL1      | 3.61E+00 | 1.82E-03 | 5.06E-03 |
| ENSG00000176927 | EFCAB5      | 2.24E+00 | 1.83E-03 | 5.09E-03 |
| ENSG00000196814 | MVB12B      | 1.31E+00 | 1.86E-03 | 5.16E-03 |
| ENSG00000188368 | PRR19       | 2.04E+00 | 1.87E-03 | 5.20E-03 |
| ENSG00000085514 | PILRA       | 3.14E+00 | 1.88E-03 | 5.21E-03 |
| ENSG00000161944 | ASGR2       | 4.08E+00 | 1.90E-03 | 5.28E-03 |
| ENSG00000270210 | AC104695.3  | 3.93E+00 | 1.90E-03 | 5.28E-03 |
| ENSG00000178502 | KLHL11      | 1.95E+00 | 1.92E-03 | 5.33E-03 |
| ENSG00000139832 | RAB20       | 1.15E+00 | 1.95E-03 | 5.39E-03 |
| ENSG00000253716 | MINCR       | 1.96E+00 | 1.96E-03 | 5.40E-03 |
| ENSG00000197956 | S100A6      | 1.37E+00 | 1.97E-03 | 5.43E-03 |
| ENSG00000197587 | DMBX1       | 3.04E+00 | 1.99E-03 | 5.49E-03 |
| ENSG00000253200 | AC037459.2  | 2.63E+00 | 1.99E-03 | 5.50E-03 |
| ENSG00000162894 | FCMR        | 2.72E+00 | 2.02E-03 | 5.58E-03 |

|                 |            |          |          |          |
|-----------------|------------|----------|----------|----------|
| ENSG00000142748 | FCN3       | 4.56E+00 | 2.05E-03 | 5.65E-03 |
| ENSG00000282988 | AL031777.3 | 2.53E+00 | 2.05E-03 | 5.65E-03 |
| ENSG00000213088 | ACKR1      | 3.22E+00 | 2.06E-03 | 5.68E-03 |
| ENSG00000184144 | CNTN2      | 5.13E+00 | 2.07E-03 | 5.70E-03 |
| ENSG00000158856 | DMTN       | 1.62E+00 | 2.07E-03 | 5.70E-03 |
| ENSG00000261790 | AC005606.2 | 4.27E+00 | 2.08E-03 | 5.72E-03 |
| ENSG00000154485 | MMP21      | 4.05E+00 | 2.09E-03 | 5.76E-03 |
| ENSG00000163141 | BNIPL      | 2.60E+00 | 2.10E-03 | 5.77E-03 |
| ENSG00000285756 | BX890604.2 | 1.04E+00 | 2.11E-03 | 5.81E-03 |
| ENSG00000197561 | ELANE      | 3.91E+00 | 2.11E-03 | 5.81E-03 |
| ENSG00000145040 | UCN2       | 1.11E+00 | 2.14E-03 | 5.88E-03 |
| ENSG00000138795 | LEF1       | 3.33E+00 | 2.15E-03 | 5.89E-03 |
| ENSG00000258891 | AC005480.1 | 4.76E+00 | 2.16E-03 | 5.91E-03 |
| ENSG00000163958 | ZDHH19     | 1.81E+00 | 2.16E-03 | 5.92E-03 |
| ENSG00000237575 | PYY2       | 3.17E+00 | 2.17E-03 | 5.94E-03 |
| ENSG00000277117 | FP565260.3 | 2.95E+00 | 2.19E-03 | 5.99E-03 |
| ENSG00000116254 | CHD5       | 2.24E+00 | 2.19E-03 | 6.00E-03 |
| ENSG00000257513 | NPIPB1P    | 4.16E+00 | 2.23E-03 | 6.10E-03 |
| ENSG00000268460 | AC006262.1 | 3.66E+00 | 2.23E-03 | 6.12E-03 |
| ENSG00000168491 | CCDC110    | 3.95E+00 | 2.24E-03 | 6.13E-03 |
| ENSG00000273448 | AC006480.2 | 2.58E+00 | 2.28E-03 | 6.23E-03 |
| ENSG00000153157 | SYCP2L     | 1.43E+00 | 2.30E-03 | 6.28E-03 |
| ENSG00000160838 | LRRRC71    | 4.03E+00 | 2.32E-03 | 6.32E-03 |
| ENSG00000243742 | RPLP0P2    | 1.40E+00 | 2.32E-03 | 6.32E-03 |
| ENSG00000251455 | AC092611.1 | 3.68E+00 | 2.34E-03 | 6.38E-03 |
| ENSG00000247271 | ZBED5-AS1  | 1.65E+00 | 2.36E-03 | 6.42E-03 |
| ENSG00000138311 | ZNF365     | 1.55E+00 | 2.36E-03 | 6.43E-03 |
| ENSG00000177133 | PRDM16-DT  | 2.97E+00 | 2.36E-03 | 6.44E-03 |
| ENSG00000143333 | RGS16      | 2.38E+00 | 2.38E-03 | 6.49E-03 |
| ENSG00000105290 | APLP1      | 1.08E+00 | 2.39E-03 | 6.52E-03 |
| ENSG00000175003 | SLC22A1    | 2.27E+00 | 2.42E-03 | 6.58E-03 |
| ENSG00000163362 | INAVA      | 1.94E+00 | 2.42E-03 | 6.58E-03 |
| ENSG00000151090 | THRB       | 3.24E+00 | 2.43E-03 | 6.60E-03 |
| ENSG00000151133 | CCDC88C    | 1.68E+00 | 2.44E-03 | 6.64E-03 |
| ENSG00000122254 | HS3ST2     | 4.01E+00 | 2.45E-03 | 6.66E-03 |
| ENSG00000252835 | SCARNA21   | 3.73E+00 | 2.45E-03 | 6.66E-03 |
| ENSG00000161921 | CXCL16     | 1.24E+00 | 2.46E-03 | 6.67E-03 |
| ENSG00000142611 | PRDM16     | 2.06E+00 | 2.46E-03 | 6.68E-03 |
| ENSG00000261087 | AP003469.4 | 2.53E+00 | 2.47E-03 | 6.70E-03 |
| ENSG00000224652 | LINC00885  | 4.02E+00 | 2.47E-03 | 6.70E-03 |

|                 |            |          |          |          |
|-----------------|------------|----------|----------|----------|
| ENSG00000187045 | TMPRSS6    | 4.09E+00 | 2.51E-03 | 6.80E-03 |
| ENSG00000163491 | NEK10      | 2.45E+00 | 2.51E-03 | 6.81E-03 |
| ENSG00000197580 | BCO2       | 2.73E+00 | 2.54E-03 | 6.87E-03 |
| ENSG00000239868 | RN7SL34P   | 4.16E+00 | 2.55E-03 | 6.92E-03 |
| ENSG00000261845 | AC124283.1 | 3.82E+00 | 2.59E-03 | 6.99E-03 |
| ENSG00000180316 | PNPLA1     | 3.82E+00 | 2.60E-03 | 7.04E-03 |
| ENSG00000259790 | ANP32BP1   | 3.49E+00 | 2.61E-03 | 7.05E-03 |
| ENSG00000205488 | CALML3-AS1 | 3.28E+00 | 2.64E-03 | 7.12E-03 |
| ENSG00000160255 | ITGB2      | 3.11E+00 | 2.64E-03 | 7.13E-03 |
| ENSG00000187391 | MAGI2      | 1.54E+00 | 2.65E-03 | 7.14E-03 |
| ENSG00000169252 | ADRB2      | 3.12E+00 | 2.65E-03 | 7.16E-03 |
| ENSG00000103241 | FOXF1      | 1.45E+00 | 2.68E-03 | 7.22E-03 |
| ENSG00000101441 | CST4       | 4.40E+00 | 2.68E-03 | 7.23E-03 |
| ENSG00000229585 | RPL21P44   | 2.07E+00 | 2.69E-03 | 7.24E-03 |
| ENSG00000140022 | STON2      | 2.47E+00 | 2.70E-03 | 7.27E-03 |
| ENSG00000236204 | LINC01376  | 4.18E+00 | 2.72E-03 | 7.32E-03 |
| ENSG00000189423 | USP32P3    | 1.48E+00 | 2.75E-03 | 7.39E-03 |
| ENSG00000219133 | AL592114.1 | 3.67E+00 | 2.76E-03 | 7.42E-03 |
| ENSG00000261278 | AC009094.1 | 3.58E+00 | 2.76E-03 | 7.42E-03 |
| ENSG00000248489 | LINC02062  | 1.67E+00 | 2.78E-03 | 7.45E-03 |
| ENSG00000204315 | FKBPL      | 1.23E+00 | 2.80E-03 | 7.52E-03 |
| ENSG00000166682 | TMPRSS5    | 3.13E+00 | 2.81E-03 | 7.54E-03 |
| ENSG00000230798 | FOXD3-AS1  | 2.39E+00 | 2.82E-03 | 7.55E-03 |
| ENSG00000131095 | GFAP       | 3.47E+00 | 2.83E-03 | 7.59E-03 |
| ENSG00000169704 | GP9        | 4.36E+00 | 2.87E-03 | 7.67E-03 |
| ENSG00000228288 | PCAT6      | 2.83E+00 | 2.87E-03 | 7.69E-03 |
| ENSG00000088320 | REM1       | 3.78E+00 | 2.88E-03 | 7.72E-03 |
| ENSG00000147394 | ZNF185     | 1.67E+00 | 2.89E-03 | 7.73E-03 |
| ENSG00000171817 | ZNF540     | 1.98E+00 | 2.89E-03 | 7.73E-03 |
| ENSG00000264148 | AC138207.3 | 2.47E+00 | 2.89E-03 | 7.74E-03 |
| ENSG00000198771 | RCSD1      | 3.32E+00 | 2.96E-03 | 7.90E-03 |
| ENSG00000196666 | FAM180B    | 3.70E+00 | 2.96E-03 | 7.90E-03 |
| ENSG00000141441 | GAREM1     | 2.47E+00 | 2.99E-03 | 7.96E-03 |
| ENSG00000249618 | LINC02465  | 4.63E+00 | 2.99E-03 | 7.97E-03 |
| ENSG00000262877 | AC110285.2 | 2.24E+00 | 3.01E-03 | 8.01E-03 |
| ENSG00000198650 | TAT        | 3.85E+00 | 3.04E-03 | 8.08E-03 |
| ENSG00000225889 | AC012368.1 | 4.54E+00 | 3.05E-03 | 8.11E-03 |
| ENSG00000130045 | NXNL2      | 2.08E+00 | 3.07E-03 | 8.15E-03 |
| ENSG00000226864 | ATE1-AS1   | 1.87E+00 | 3.08E-03 | 8.17E-03 |
| ENSG00000224721 | AC007182.1 | 3.74E+00 | 3.09E-03 | 8.20E-03 |

|                 |            |          |          |          |
|-----------------|------------|----------|----------|----------|
| ENSG00000159212 | CLIC6      | 3.17E+00 | 3.10E-03 | 8.24E-03 |
| ENSG00000145911 | N4BP3      | 2.75E+00 | 3.11E-03 | 8.25E-03 |
| ENSG00000231160 | KLF3-AS1   | 3.41E+00 | 3.12E-03 | 8.28E-03 |
| ENSG00000177551 | NHLH2      | 2.26E+00 | 3.13E-03 | 8.31E-03 |
| ENSG00000165025 | SYK        | 4.19E+00 | 3.14E-03 | 8.31E-03 |
| ENSG00000256955 | AC131009.2 | 2.36E+00 | 3.15E-03 | 8.35E-03 |
| ENSG00000103740 | ACSBG1     | 3.86E+00 | 3.16E-03 | 8.36E-03 |
| ENSG00000141837 | CACNA1A    | 1.27E+00 | 3.16E-03 | 8.38E-03 |
| ENSG00000205323 | SARNP      | 1.38E+00 | 3.17E-03 | 8.38E-03 |
| ENSG00000102003 | SYP        | 1.42E+00 | 3.20E-03 | 8.46E-03 |
| ENSG00000286288 | AL109809.5 | 3.49E+00 | 3.21E-03 | 8.49E-03 |
| ENSG00000268218 | AC137932.3 | 3.01E+00 | 3.23E-03 | 8.53E-03 |
| ENSG00000122133 | PAEP       | 3.51E+00 | 3.28E-03 | 8.66E-03 |
| ENSG00000088538 | DOCK3      | 1.62E+00 | 3.29E-03 | 8.68E-03 |
| ENSG00000163959 | SLC51A     | 3.24E+00 | 3.30E-03 | 8.71E-03 |
| ENSG00000118407 | FILIP1     | 2.34E+00 | 3.30E-03 | 8.71E-03 |
| ENSG00000149243 | KLHL35     | 4.30E+00 | 3.37E-03 | 8.86E-03 |
| ENSG00000141665 | FBXO15     | 2.95E+00 | 3.39E-03 | 8.91E-03 |
| ENSG00000064655 | EYA2       | 1.54E+00 | 3.40E-03 | 8.94E-03 |
| ENSG00000182575 | NXPH3      | 2.61E+00 | 3.43E-03 | 9.01E-03 |
| ENSG00000144821 | MYH15      | 3.11E+00 | 3.45E-03 | 9.06E-03 |
| ENSG00000176472 | ZNF575     | 2.27E+00 | 3.46E-03 | 9.08E-03 |
| ENSG00000263201 | DPEP2NB    | 3.71E+00 | 3.46E-03 | 9.10E-03 |
| ENSG00000244558 | KCNK15-AS1 | 2.98E+00 | 3.50E-03 | 9.18E-03 |
| ENSG00000143226 | FCGR2A     | 3.00E+00 | 3.51E-03 | 9.20E-03 |
| ENSG00000166145 | SPINT1     | 2.07E+00 | 3.51E-03 | 9.20E-03 |
| ENSG00000203722 | RAET1G     | 2.30E+00 | 3.54E-03 | 9.27E-03 |
| ENSG00000178404 | CEP295NL   | 2.35E+00 | 3.56E-03 | 9.32E-03 |
| ENSG00000287170 | AC010327.8 | 3.30E+00 | 3.59E-03 | 9.40E-03 |
| ENSG00000135077 | HAVCR2     | 3.87E+00 | 3.59E-03 | 9.41E-03 |
| ENSG00000125084 | WNT1       | 4.00E+00 | 3.62E-03 | 9.47E-03 |
| ENSG00000184060 | ADAP2      | 2.89E+00 | 3.66E-03 | 9.56E-03 |
| ENSG00000266680 | AL135905.1 | 2.80E+00 | 3.67E-03 | 9.60E-03 |
| ENSG00000153789 | FAM92B     | 2.63E+00 | 3.67E-03 | 9.60E-03 |
| ENSG00000270681 | AC095055.1 | 3.31E+00 | 3.69E-03 | 9.65E-03 |
| ENSG00000188766 | SPRED3     | 2.36E+00 | 3.71E-03 | 9.69E-03 |
| ENSG00000121797 | CCRL2      | 2.88E+00 | 3.72E-03 | 9.69E-03 |
| ENSG00000105219 | CNTD2      | 3.41E+00 | 3.72E-03 | 9.70E-03 |
| ENSG00000159714 | ZDHHC1     | 3.67E+00 | 3.74E-03 | 9.74E-03 |
| ENSG00000069702 | TGFBR3     | 1.89E+00 | 3.75E-03 | 9.76E-03 |



|                 |            |          |          |          |
|-----------------|------------|----------|----------|----------|
| ENSG00000163472 | TMEM79     | 1.13E+00 | 3.75E-03 | 9.77E-03 |
| ENSG00000228126 | FALEC      | 1.81E+00 | 3.76E-03 | 9.80E-03 |
| ENSG00000270091 | AC015726.1 | 2.13E+00 | 3.77E-03 | 9.82E-03 |
| ENSG00000278383 | AL031673.1 | 2.73E+00 | 3.77E-03 | 9.82E-03 |
| ENSG00000269028 | MTRNR2L12  | 2.34E+00 | 3.78E-03 | 9.82E-03 |
| ENSG00000166924 | NYAP1      | 3.08E+00 | 3.79E-03 | 9.85E-03 |
| ENSG00000111087 | GLI1       | 2.29E+00 | 3.80E-03 | 9.88E-03 |
| ENSG00000106258 | CYP3A5     | 3.52E+00 | 3.80E-03 | 9.88E-03 |
| ENSG00000196139 | AKR1C3     | 2.99E+00 | 3.81E-03 | 9.90E-03 |
| ENSG00000286156 | AC026273.1 | 1.10E+00 | 3.83E-03 | 9.94E-03 |
| ENSG00000147036 | LANCL3     | 3.14E+00 | 3.83E-03 | 9.95E-03 |
| ENSG00000166220 | TBATA      | 4.08E+00 | 3.84E-03 | 9.96E-03 |
| ENSG00000260302 | AP005482.1 | 3.02E+00 | 3.85E-03 | 9.98E-03 |
| ENSG00000255642 | PABPC1P4   | 1.16E+00 | 3.91E-03 | 1.01E-02 |
| ENSG00000111837 | MAK        | 1.52E+00 | 3.94E-03 | 1.02E-02 |
| ENSG00000142405 | NLRP12     | 4.05E+00 | 3.94E-03 | 1.02E-02 |
| ENSG00000198855 | FICD       | 1.33E+00 | 3.95E-03 | 1.02E-02 |
| ENSG00000264575 | LINC00526  | 1.92E+00 | 3.96E-03 | 1.02E-02 |
| ENSG00000141622 | RNF165     | 1.20E+00 | 3.96E-03 | 1.03E-02 |
| ENSG00000248593 | DSTNP2     | 1.31E+00 | 3.97E-03 | 1.03E-02 |
| ENSG00000108381 | ASPA       | 3.10E+00 | 3.97E-03 | 1.03E-02 |
| ENSG00000178623 | GPR35      | 2.15E+00 | 3.97E-03 | 1.03E-02 |
| ENSG00000101049 | SGK2       | 3.05E+00 | 3.98E-03 | 1.03E-02 |
| ENSG00000173110 | HSPA6      | 1.92E+00 | 4.01E-03 | 1.04E-02 |
| ENSG00000104967 | NOVA2      | 2.19E+00 | 4.03E-03 | 1.04E-02 |
| ENSG00000264112 | AC015813.1 | 2.30E+00 | 4.04E-03 | 1.04E-02 |
| ENSG00000211891 | IGHE       | 3.91E+00 | 4.07E-03 | 1.05E-02 |
| ENSG00000135063 | FAM189A2   | 3.68E+00 | 4.08E-03 | 1.05E-02 |
| ENSG00000120903 | CHRNA2     | 3.90E+00 | 4.10E-03 | 1.06E-02 |
| ENSG00000234580 | AL356157.1 | 3.99E+00 | 4.10E-03 | 1.06E-02 |
| ENSG00000187135 | VSTM2B     | 3.51E+00 | 4.12E-03 | 1.06E-02 |
| ENSG00000104728 | ARHGEF10   | 1.18E+00 | 4.12E-03 | 1.06E-02 |
| ENSG00000219163 | HMGB1P20   | 3.01E+00 | 4.12E-03 | 1.06E-02 |
| ENSG00000260942 | CAPN10-DT  | 1.21E+00 | 4.13E-03 | 1.06E-02 |
| ENSG00000261655 | AC100803.3 | 3.48E+00 | 4.13E-03 | 1.06E-02 |
| ENSG00000143412 | ANXA9      | 3.42E+00 | 4.16E-03 | 1.07E-02 |
| ENSG00000138136 | LBX1       | 3.44E+00 | 4.16E-03 | 1.07E-02 |
| ENSG00000173013 | CCDC96     | 1.50E+00 | 4.18E-03 | 1.08E-02 |
| ENSG00000267249 | AP005482.3 | 1.99E+00 | 4.18E-03 | 1.08E-02 |
| ENSG00000179832 | MROH1      | 1.13E+00 | 4.19E-03 | 1.08E-02 |

|                 |             |          |          |          |
|-----------------|-------------|----------|----------|----------|
| ENSG00000153902 | LGI4        | 2.32E+00 | 4.20E-03 | 1.08E-02 |
| ENSG00000260160 | AC011468.1  | 2.03E+00 | 4.26E-03 | 1.09E-02 |
| ENSG00000261542 | AC011978.2  | 1.97E+00 | 4.27E-03 | 1.10E-02 |
| ENSG00000142609 | CFAP74      | 2.56E+00 | 4.28E-03 | 1.10E-02 |
| ENSG00000186190 | BPIFB3      | 4.37E+00 | 4.28E-03 | 1.10E-02 |
| ENSG00000095370 | SH2D3C      | 2.67E+00 | 4.28E-03 | 1.10E-02 |
| ENSG00000124194 | GDAP1L1     | 2.33E+00 | 4.29E-03 | 1.10E-02 |
| ENSG00000099251 | HSD17B7P2   | 2.97E+00 | 4.30E-03 | 1.10E-02 |
| ENSG00000069424 | KCNAB2      | 1.23E+00 | 4.30E-03 | 1.10E-02 |
| ENSG00000170827 | CELP        | 3.79E+00 | 4.34E-03 | 1.11E-02 |
| ENSG00000170325 | PRDM10      | 1.01E+00 | 4.38E-03 | 1.12E-02 |
| ENSG00000130540 | SULT4A1     | 2.56E+00 | 4.40E-03 | 1.13E-02 |
| ENSG00000254614 | AP003068.2  | 1.52E+00 | 4.41E-03 | 1.13E-02 |
| ENSG00000166448 | TMEM130     | 2.86E+00 | 4.41E-03 | 1.13E-02 |
| ENSG00000182771 | GRID1       | 3.16E+00 | 4.47E-03 | 1.14E-02 |
| ENSG00000252010 | SCARNA5     | 1.86E+00 | 4.50E-03 | 1.15E-02 |
| ENSG00000136457 | CHAD        | 3.76E+00 | 4.50E-03 | 1.15E-02 |
| ENSG00000261068 | AL512274.1  | 3.93E+00 | 4.53E-03 | 1.16E-02 |
| ENSG00000173227 | SYT12       | 1.68E+00 | 4.54E-03 | 1.16E-02 |
| ENSG00000283511 | AC137936.2  | 3.06E+00 | 4.57E-03 | 1.17E-02 |
| ENSG00000164695 | CHMP4C      | 2.83E+00 | 4.57E-03 | 1.17E-02 |
| ENSG00000253230 | LINC00599   | 4.98E+00 | 4.60E-03 | 1.17E-02 |
| ENSG00000276851 | AC002401.4  | 1.74E+00 | 4.62E-03 | 1.18E-02 |
| ENSG00000154263 | ABCA10      | 2.59E+00 | 4.79E-03 | 1.22E-02 |
| ENSG00000198221 | AFDN-DT     | 3.75E+00 | 4.82E-03 | 1.22E-02 |
| ENSG00000167971 | CASKIN1     | 2.24E+00 | 4.82E-03 | 1.22E-02 |
| ENSG00000143882 | ATP6V1C2    | 3.52E+00 | 4.85E-03 | 1.23E-02 |
| ENSG00000100362 | PVALB       | 3.99E+00 | 4.86E-03 | 1.23E-02 |
| ENSG00000233098 | CCDC144NL-A | 2.46E+00 | 4.92E-03 | 1.25E-02 |
| ENSG00000008056 | SYN1        | 2.37E+00 | 4.98E-03 | 1.26E-02 |
| ENSG00000182938 | OTOP3       | 4.51E+00 | 4.99E-03 | 1.26E-02 |
| ENSG00000259711 | AC106738.1  | 3.83E+00 | 5.02E-03 | 1.27E-02 |
| ENSG00000167641 | PPP1R14A    | 2.89E+00 | 5.03E-03 | 1.27E-02 |
| ENSG00000138347 | MYPN        | 2.34E+00 | 5.05E-03 | 1.28E-02 |
| ENSG00000002933 | TMEM176A    | 4.54E+00 | 5.07E-03 | 1.28E-02 |
| ENSG00000137877 | SPTBN5      | 2.62E+00 | 5.14E-03 | 1.30E-02 |
| ENSG00000143248 | RGS5        | 2.15E+00 | 5.14E-03 | 1.30E-02 |
| ENSG00000136167 | LCP1        | 1.74E+00 | 5.22E-03 | 1.31E-02 |
| ENSG00000106077 | ABHD11      | 1.04E+00 | 5.22E-03 | 1.31E-02 |
| ENSG00000204540 | PSORS1C1    | 2.63E+00 | 5.29E-03 | 1.33E-02 |

|                 |              |          |          |          |
|-----------------|--------------|----------|----------|----------|
| ENSG00000136960 | ENPP2        | 2.11E+00 | 5.30E-03 | 1.33E-02 |
| ENSG00000170190 | SLC16A5      | 1.16E+00 | 5.33E-03 | 1.34E-02 |
| ENSG00000147697 | GSDMC        | 3.64E+00 | 5.34E-03 | 1.34E-02 |
| ENSG00000189420 | ZFP92        | 1.95E+00 | 5.35E-03 | 1.34E-02 |
| ENSG00000273489 | AC008264.2   | 3.47E+00 | 5.37E-03 | 1.35E-02 |
| ENSG00000174130 | TLR6         | 1.50E+00 | 5.37E-03 | 1.35E-02 |
| ENSG00000272842 | AL391834.1   | 2.37E+00 | 5.45E-03 | 1.36E-02 |
| ENSG00000246203 | AL353807.3   | 3.08E+00 | 5.46E-03 | 1.37E-02 |
| ENSG00000177363 | LRRN4CL      | 3.15E+00 | 5.61E-03 | 1.40E-02 |
| ENSG00000177398 | UMODL1       | 4.29E+00 | 5.61E-03 | 1.40E-02 |
| ENSG00000173320 | STOX2        | 2.06E+00 | 5.65E-03 | 1.41E-02 |
| ENSG00000222035 | KIAA2012-AS1 | 3.51E+00 | 5.66E-03 | 1.41E-02 |
| ENSG00000259494 | MRPL46       | 1.44E+00 | 5.72E-03 | 1.43E-02 |
| ENSG00000188277 | C15orf62     | 3.18E+00 | 5.73E-03 | 1.43E-02 |
| ENSG00000167992 | VWCE         | 2.75E+00 | 5.73E-03 | 1.43E-02 |
| ENSG00000125046 | SSUH2        | 2.94E+00 | 5.76E-03 | 1.43E-02 |
| ENSG00000205642 | VCX3B        | 2.81E+00 | 5.79E-03 | 1.44E-02 |
| ENSG00000135519 | KCNH3        | 1.56E+00 | 5.82E-03 | 1.45E-02 |
| ENSG00000177025 | C19orf18     | 2.08E+00 | 5.83E-03 | 1.45E-02 |
| ENSG00000276170 | AC244153.1   | 2.20E+00 | 5.95E-03 | 1.48E-02 |
| ENSG00000163328 | GPR155       | 1.54E+00 | 6.01E-03 | 1.49E-02 |
| ENSG00000169548 | ZNF280A      | 3.66E+00 | 6.03E-03 | 1.49E-02 |
| ENSG00000006071 | ABCC8        | 3.93E+00 | 6.03E-03 | 1.50E-02 |
| ENSG00000151136 | BTBD11       | 2.96E+00 | 6.05E-03 | 1.50E-02 |
| ENSG00000255823 | MTRNR2L8     | 2.90E+00 | 6.05E-03 | 1.50E-02 |
| ENSG00000149418 | ST14         | 3.14E+00 | 6.06E-03 | 1.50E-02 |
| ENSG00000227070 | AC104170.1   | 3.60E+00 | 6.08E-03 | 1.50E-02 |
| ENSG00000288380 | CRIPAK       | 1.76E+00 | 6.09E-03 | 1.51E-02 |
| ENSG00000204344 | STK19        | 1.33E+00 | 6.09E-03 | 1.51E-02 |
| ENSG00000177465 | ACOT4        | 1.47E+00 | 6.18E-03 | 1.53E-02 |
| ENSG00000163564 | PYHIN1       | 3.42E+00 | 6.19E-03 | 1.53E-02 |
| ENSG00000232079 | LINC01697    | 4.13E+00 | 6.22E-03 | 1.54E-02 |
| ENSG00000162105 | SHANK2       | 4.00E+00 | 6.26E-03 | 1.55E-02 |
| ENSG00000214612 | RPS19P1      | 1.83E+00 | 6.27E-03 | 1.55E-02 |
| ENSG00000006740 | ARHGAP44     | 1.33E+00 | 6.27E-03 | 1.55E-02 |
| ENSG00000160781 | PAQR6        | 3.17E+00 | 6.31E-03 | 1.56E-02 |
| ENSG00000109265 | KIAA1211     | 2.53E+00 | 6.36E-03 | 1.57E-02 |
| ENSG00000257831 | AL136418.1   | 4.41E+00 | 6.42E-03 | 1.58E-02 |
| ENSG00000102575 | ACP5         | 2.93E+00 | 6.44E-03 | 1.58E-02 |
| ENSG00000267719 | LINC02078    | 3.97E+00 | 6.47E-03 | 1.59E-02 |

|                 |              |          |          |          |
|-----------------|--------------|----------|----------|----------|
| ENSG00000272106 | AL691432.2   | 1.57E+00 | 6.47E-03 | 1.59E-02 |
| ENSG00000272288 | AL451165.2   | 1.66E+00 | 6.55E-03 | 1.61E-02 |
| ENSG00000105613 | MAST1        | 1.43E+00 | 6.59E-03 | 1.62E-02 |
| ENSG00000064201 | TSPAN32      | 4.20E+00 | 6.60E-03 | 1.62E-02 |
| ENSG00000129646 | QRICH2       | 2.28E+00 | 6.64E-03 | 1.63E-02 |
| ENSG00000148541 | FAM13C       | 2.02E+00 | 6.68E-03 | 1.64E-02 |
| ENSG00000272092 | AC087623.2   | 2.87E+00 | 6.71E-03 | 1.64E-02 |
| ENSG00000197016 | ZNF470       | 1.02E+00 | 6.71E-03 | 1.64E-02 |
| ENSG00000205464 | ATP6AP1L     | 1.08E+00 | 6.73E-03 | 1.65E-02 |
| ENSG00000095303 | PTGS1        | 1.92E+00 | 6.75E-03 | 1.65E-02 |
| ENSG00000168404 | MLKL         | 1.05E+00 | 6.78E-03 | 1.66E-02 |
| ENSG00000182870 | GALNT9       | 2.77E+00 | 6.79E-03 | 1.66E-02 |
| ENSG00000261997 | AC007336.1   | 2.32E+00 | 6.91E-03 | 1.69E-02 |
| ENSG00000122679 | RAMP3        | 3.83E+00 | 6.91E-03 | 1.69E-02 |
| ENSG00000251141 | MRPS30-DT    | 2.71E+00 | 6.94E-03 | 1.70E-02 |
| ENSG00000189233 | NUGGC        | 3.71E+00 | 6.96E-03 | 1.70E-02 |
| ENSG00000260086 | AC007611.1   | 2.56E+00 | 6.96E-03 | 1.70E-02 |
| ENSG00000177076 | ACER2        | 2.50E+00 | 7.01E-03 | 1.71E-02 |
| ENSG00000175556 | LONRF3       | 2.09E+00 | 7.08E-03 | 1.73E-02 |
| ENSG00000137642 | SORL1        | 2.14E+00 | 7.08E-03 | 1.73E-02 |
| ENSG00000100433 | KCNK10       | 3.68E+00 | 7.12E-03 | 1.74E-02 |
| ENSG00000139629 | GALNT6       | 1.24E+00 | 7.16E-03 | 1.75E-02 |
| ENSG00000279092 | AC025678.3   | 1.43E+00 | 7.23E-03 | 1.76E-02 |
| ENSG00000186191 | BPIFB4       | 3.74E+00 | 7.27E-03 | 1.77E-02 |
| ENSG00000167608 | TMC4         | 3.57E+00 | 7.33E-03 | 1.78E-02 |
| ENSG00000270195 | AC016773.1   | 2.21E+00 | 7.34E-03 | 1.78E-02 |
| ENSG00000155980 | KIF5A        | 2.39E+00 | 7.50E-03 | 1.82E-02 |
| ENSG00000185332 | AC027601.1   | 4.05E+00 | 7.50E-03 | 1.82E-02 |
| ENSG00000104826 | LHB          | 3.04E+00 | 7.54E-03 | 1.83E-02 |
| ENSG00000146005 | PSD2         | 2.75E+00 | 7.54E-03 | 1.83E-02 |
| ENSG00000099869 | IGF2-AS      | 3.59E+00 | 7.56E-03 | 1.83E-02 |
| ENSG00000119457 | SLC46A2      | 3.86E+00 | 7.63E-03 | 1.85E-02 |
| ENSG00000212694 | LINC01089    | 1.20E+00 | 7.66E-03 | 1.85E-02 |
| ENSG00000019186 | CYP24A1      | 2.67E+00 | 7.75E-03 | 1.87E-02 |
| ENSG00000257950 | P2RX5-TAX1BI | 2.39E+00 | 7.78E-03 | 1.88E-02 |
| ENSG00000273311 | DGCR11       | 1.24E+00 | 7.82E-03 | 1.89E-02 |
| ENSG00000174951 | FUT1         | 1.17E+00 | 7.83E-03 | 1.89E-02 |
| ENSG00000186230 | ZNF749       | 1.44E+00 | 7.88E-03 | 1.90E-02 |
| ENSG00000279227 | AC009303.4   | 1.94E+00 | 7.90E-03 | 1.91E-02 |
| ENSG00000162383 | SLC1A7       | 3.36E+00 | 7.96E-03 | 1.92E-02 |

|                 |            |          |          |          |
|-----------------|------------|----------|----------|----------|
| ENSG00000111319 | SCNN1A     | 2.66E+00 | 7.98E-03 | 1.92E-02 |
| ENSG00000198590 | C3orf35    | 2.18E+00 | 8.00E-03 | 1.93E-02 |
| ENSG00000273137 | AL022328.2 | 2.93E+00 | 8.04E-03 | 1.94E-02 |
| ENSG00000183778 | B3GALT5    | 4.09E+00 | 8.04E-03 | 1.94E-02 |
| ENSG00000181126 | HLA-V      | 4.15E+00 | 8.06E-03 | 1.94E-02 |
| ENSG00000088002 | SULT2B1    | 2.43E+00 | 8.08E-03 | 1.94E-02 |
| ENSG00000211897 | IGHG3      | 3.35E+00 | 8.11E-03 | 1.95E-02 |
| ENSG00000135299 | ANKRD6     | 1.17E+00 | 8.15E-03 | 1.96E-02 |
| ENSG00000253878 | AC087752.3 | 4.49E+00 | 8.27E-03 | 1.98E-02 |
| ENSG00000197046 | SIGLEC15   | 3.69E+00 | 8.32E-03 | 1.99E-02 |
| ENSG00000274341 | AC005899.6 | 3.96E+00 | 8.33E-03 | 2.00E-02 |
| ENSG00000142583 | SLC2A5     | 2.75E+00 | 8.37E-03 | 2.01E-02 |
| ENSG00000167074 | TEF        | 1.51E+00 | 8.50E-03 | 2.03E-02 |
| ENSG00000152315 | KCNK13     | 3.04E+00 | 8.52E-03 | 2.04E-02 |
| ENSG00000260317 | AC009812.4 | 2.10E+00 | 8.55E-03 | 2.04E-02 |
| ENSG00000179913 | B3GNT3     | 3.61E+00 | 8.56E-03 | 2.05E-02 |
| ENSG00000138378 | STAT4      | 3.86E+00 | 8.58E-03 | 2.05E-02 |
| ENSG00000121075 | TBX4       | 3.75E+00 | 8.58E-03 | 2.05E-02 |
| ENSG00000267226 | AC104971.1 | 3.24E+00 | 8.63E-03 | 2.06E-02 |
| ENSG00000112499 | SLC22A2    | 3.36E+00 | 8.67E-03 | 2.07E-02 |
| ENSG00000189223 | PAX8-AS1   | 3.01E+00 | 8.71E-03 | 2.08E-02 |
| ENSG00000010327 | STAB1      | 3.68E+00 | 8.72E-03 | 2.08E-02 |
| ENSG00000250312 | ZNF718     | 1.38E+00 | 8.75E-03 | 2.08E-02 |
| ENSG00000239569 | KMT2E-AS1  | 1.74E+00 | 8.78E-03 | 2.09E-02 |
| ENSG00000186564 | FOXD2      | 1.13E+00 | 8.84E-03 | 2.11E-02 |
| ENSG00000152056 | AP1S3      | 1.00E+00 | 8.90E-03 | 2.12E-02 |
| ENSG00000115718 | PROC       | 1.85E+00 | 8.96E-03 | 2.13E-02 |
| ENSG00000245275 | SAP30L-AS1 | 1.76E+00 | 9.00E-03 | 2.14E-02 |
| ENSG00000163082 | SGPP2      | 3.13E+00 | 9.05E-03 | 2.15E-02 |
| ENSG00000151067 | CACNA1C    | 1.29E+00 | 9.08E-03 | 2.16E-02 |
| ENSG00000130700 | GATA5      | 2.22E+00 | 9.11E-03 | 2.17E-02 |
| ENSG00000204362 | LINC02783  | 3.98E+00 | 9.19E-03 | 2.18E-02 |
| ENSG00000123453 | SARDH      | 1.31E+00 | 9.24E-03 | 2.19E-02 |
| ENSG00000172901 | LVRN       | 2.63E+00 | 9.26E-03 | 2.20E-02 |
| ENSG00000270607 | AC009549.1 | 1.91E+00 | 9.26E-03 | 2.20E-02 |
| ENSG00000120645 | IQSEC3     | 3.83E+00 | 9.37E-03 | 2.22E-02 |
| ENSG00000169330 | MINAR1     | 1.70E+00 | 9.45E-03 | 2.24E-02 |
| ENSG00000111846 | GCNT2      | 1.56E+00 | 9.46E-03 | 2.24E-02 |
| ENSG00000005961 | ITGA2B     | 1.05E+00 | 9.48E-03 | 2.24E-02 |
| ENSG00000166126 | AMN        | 3.32E+00 | 9.56E-03 | 2.26E-02 |

|                 |              |          |          |          |
|-----------------|--------------|----------|----------|----------|
| ENSG00000169885 | CALML6       | 2.41E+00 | 9.61E-03 | 2.27E-02 |
| ENSG00000183248 | PRR36        | 2.52E+00 | 9.63E-03 | 2.28E-02 |
| ENSG00000254815 | AP006284.1   | 3.08E+00 | 9.64E-03 | 2.28E-02 |
| ENSG00000248476 | BACH1-IT1    | 1.72E+00 | 9.67E-03 | 2.29E-02 |
| ENSG00000115705 | TPO          | 4.16E+00 | 9.75E-03 | 2.30E-02 |
| ENSG00000151687 | ANKAR        | 2.28E+00 | 9.90E-03 | 2.33E-02 |
| ENSG00000162746 | FCRLB        | 2.52E+00 | 9.93E-03 | 2.34E-02 |
| ENSG00000197180 | AC244090.1   | 1.18E+00 | 9.94E-03 | 2.34E-02 |
| ENSG00000236548 | RNF217-AS1   | 3.23E+00 | 9.94E-03 | 2.34E-02 |
| ENSG00000224079 | AC091729.1   | 3.60E+00 | 9.95E-03 | 2.35E-02 |
| ENSG00000238005 | AL391832.2   | 2.87E+00 | 9.96E-03 | 2.35E-02 |
| ENSG00000278000 | AC139100.2   | 1.84E+00 | 1.00E-02 | 2.36E-02 |
| ENSG00000255284 | AP006621.3   | 1.62E+00 | 1.02E-02 | 2.39E-02 |
| ENSG00000254423 | AC087203.1   | 4.47E+00 | 1.02E-02 | 2.39E-02 |
| ENSG00000147642 | SYBU         | 3.33E+00 | 1.03E-02 | 2.43E-02 |
| ENSG00000112562 | SMOC2        | 3.99E+00 | 1.04E-02 | 2.43E-02 |
| ENSG00000271992 | AL354872.2   | 2.71E+00 | 1.04E-02 | 2.44E-02 |
| ENSG00000271788 | AC008875.1   | 3.27E+00 | 1.04E-02 | 2.44E-02 |
| ENSG00000113522 | RAD50        | 1.30E+00 | 1.04E-02 | 2.45E-02 |
| ENSG00000167874 | TMEM88       | 2.11E+00 | 1.05E-02 | 2.46E-02 |
| ENSG00000198515 | CNGA1        | 2.95E+00 | 1.06E-02 | 2.47E-02 |
| ENSG00000153012 | LGI2         | 3.10E+00 | 1.06E-02 | 2.48E-02 |
| ENSG00000100341 | PNPLA5       | 3.15E+00 | 1.06E-02 | 2.49E-02 |
| ENSG00000130487 | KLHDC7B      | 3.45E+00 | 1.06E-02 | 2.49E-02 |
| ENSG00000100678 | SLC8A3       | 3.71E+00 | 1.06E-02 | 2.49E-02 |
| ENSG00000262454 | MIR193BHG    | 1.10E+00 | 1.08E-02 | 2.53E-02 |
| ENSG00000262712 | AC012676.1   | 1.88E+00 | 1.10E-02 | 2.56E-02 |
| ENSG00000173210 | ABLIM3       | 1.27E+00 | 1.10E-02 | 2.57E-02 |
| ENSG00000235652 | AL356599.1   | 1.91E+00 | 1.11E-02 | 2.58E-02 |
| ENSG00000233542 | AL391845.2   | 4.26E+00 | 1.11E-02 | 2.59E-02 |
| ENSG00000234771 | SLC25A25-AS1 | 1.22E+00 | 1.12E-02 | 2.61E-02 |
| ENSG00000171811 | CFAP46       | 1.53E+00 | 1.13E-02 | 2.62E-02 |
| ENSG00000137496 | IL18BP       | 1.50E+00 | 1.13E-02 | 2.62E-02 |
| ENSG00000183873 | SCN5A        | 1.27E+00 | 1.13E-02 | 2.63E-02 |
| ENSG00000144671 | SLC22A14     | 2.86E+00 | 1.13E-02 | 2.63E-02 |
| ENSG00000255145 | STX17-AS1    | 3.42E+00 | 1.14E-02 | 2.65E-02 |
| ENSG00000116983 | HPCAL4       | 1.19E+00 | 1.14E-02 | 2.66E-02 |
| ENSG00000164093 | PITX2        | 1.75E+00 | 1.14E-02 | 2.66E-02 |
| ENSG00000171658 | NMRAL2P      | 3.23E+00 | 1.15E-02 | 2.66E-02 |
| ENSG00000231799 | PA2G4P6      | 3.31E+00 | 1.15E-02 | 2.66E-02 |

|                 |            |          |          |          |
|-----------------|------------|----------|----------|----------|
| ENSG00000101213 | PTK6       | 3.54E+00 | 1.15E-02 | 2.67E-02 |
| ENSG00000174514 | MFSD4A     | 3.19E+00 | 1.16E-02 | 2.68E-02 |
| ENSG00000264230 | ANXA8L1    | 2.55E+00 | 1.16E-02 | 2.69E-02 |
| ENSG00000142178 | SIK1       | 1.58E+00 | 1.17E-02 | 2.70E-02 |
| ENSG00000178401 | DNAJC22    | 2.24E+00 | 1.17E-02 | 2.70E-02 |
| ENSG00000214553 | LRRC37A11P | 3.50E+00 | 1.17E-02 | 2.72E-02 |
| ENSG00000149527 | PLCH2      | 3.41E+00 | 1.18E-02 | 2.72E-02 |
| ENSG00000048052 | HDAC9      | 1.40E+00 | 1.18E-02 | 2.73E-02 |
| ENSG00000164309 | CMYA5      | 2.39E+00 | 1.19E-02 | 2.74E-02 |
| ENSG00000224660 | SH3BP5-AS1 | 1.50E+00 | 1.19E-02 | 2.75E-02 |
| ENSG00000251576 | LINC01267  | 3.64E+00 | 1.19E-02 | 2.76E-02 |
| ENSG00000259479 | SORD2P     | 3.95E+00 | 1.20E-02 | 2.78E-02 |
| ENSG00000198835 | GJC2       | 1.95E+00 | 1.20E-02 | 2.78E-02 |
| ENSG00000261220 | AC103706.1 | 2.04E+00 | 1.21E-02 | 2.78E-02 |
| ENSG00000137709 | POU2F3     | 3.26E+00 | 1.21E-02 | 2.78E-02 |
| ENSG00000279806 | AC018629.1 | 4.13E+00 | 1.21E-02 | 2.79E-02 |
| ENSG00000143110 | C1orf162   | 2.46E+00 | 1.21E-02 | 2.80E-02 |
| ENSG00000284640 | AL590434.1 | 2.96E+00 | 1.22E-02 | 2.80E-02 |
| ENSG00000122547 | EEPDI      | 1.58E+00 | 1.22E-02 | 2.81E-02 |
| ENSG00000235663 | SAPCD1-AS1 | 3.06E+00 | 1.22E-02 | 2.81E-02 |
| ENSG00000141639 | MAPK4      | 4.08E+00 | 1.22E-02 | 2.81E-02 |
| ENSG00000189149 | CRYM-AS1   | 2.53E+00 | 1.23E-02 | 2.82E-02 |
| ENSG00000226088 | AL158839.1 | 3.80E+00 | 1.23E-02 | 2.83E-02 |
| ENSG00000173599 | PC         | 1.04E+00 | 1.23E-02 | 2.84E-02 |
| ENSG00000206538 | VGLL3      | 1.01E+00 | 1.24E-02 | 2.86E-02 |
| ENSG00000176532 | PRR15      | 3.90E+00 | 1.25E-02 | 2.88E-02 |
| ENSG00000215158 | AC138409.2 | 1.27E+00 | 1.25E-02 | 2.88E-02 |
| ENSG00000226338 | AC079150.1 | 1.20E+00 | 1.26E-02 | 2.89E-02 |
| ENSG00000243284 | VSIG8      | 2.52E+00 | 1.26E-02 | 2.89E-02 |
| ENSG00000235385 | LINC02154  | 3.24E+00 | 1.26E-02 | 2.89E-02 |
| ENSG00000164744 | SUN3       | 3.00E+00 | 1.27E-02 | 2.91E-02 |
| ENSG00000241255 | AL136126.1 | 2.35E+00 | 1.27E-02 | 2.91E-02 |
| ENSG00000123405 | NFE2       | 1.61E+00 | 1.28E-02 | 2.94E-02 |
| ENSG00000207864 | MIR27B     | 3.98E+00 | 1.28E-02 | 2.94E-02 |
| ENSG00000180861 | LINC01559  | 3.34E+00 | 1.29E-02 | 2.94E-02 |
| ENSG00000279502 | AC016542.2 | 1.62E+00 | 1.29E-02 | 2.95E-02 |
| ENSG00000226179 | LINC00685  | 1.40E+00 | 1.30E-02 | 2.97E-02 |
| ENSG00000174502 | SLC26A9    | 3.37E+00 | 1.30E-02 | 2.97E-02 |
| ENSG00000232653 | GOLGA8N    | 2.63E+00 | 1.31E-02 | 2.98E-02 |
| ENSG00000197249 | SERPINA1   | 2.87E+00 | 1.31E-02 | 2.99E-02 |

|                 |            |          |          |          |
|-----------------|------------|----------|----------|----------|
| ENSG00000169031 | COL4A3     | 3.95E+00 | 1.31E-02 | 3.00E-02 |
| ENSG00000280239 | AC011498.7 | 1.52E+00 | 1.32E-02 | 3.01E-02 |
| ENSG00000203727 | SAMD5      | 3.33E+00 | 1.32E-02 | 3.01E-02 |
| ENSG00000060718 | COL11A1    | 4.14E+00 | 1.33E-02 | 3.02E-02 |
| ENSG00000236753 | MKLN1-AS   | 1.24E+00 | 1.33E-02 | 3.03E-02 |
| ENSG00000008128 | CDK11A     | 1.83E+00 | 1.33E-02 | 3.03E-02 |
| ENSG00000285867 | BX470102.2 | 3.23E+00 | 1.34E-02 | 3.04E-02 |
| ENSG00000124134 | KCNS1      | 2.51E+00 | 1.34E-02 | 3.05E-02 |
| ENSG00000104814 | MAP4K1     | 2.17E+00 | 1.34E-02 | 3.05E-02 |
| ENSG00000171219 | CDC42BPG   | 1.43E+00 | 1.34E-02 | 3.05E-02 |
| ENSG00000130304 | SLC27A1    | 1.07E+00 | 1.35E-02 | 3.07E-02 |
| ENSG00000089199 | CHGB       | 2.92E+00 | 1.36E-02 | 3.09E-02 |
| ENSG00000121577 | POPDC2     | 2.62E+00 | 1.36E-02 | 3.09E-02 |
| ENSG00000175463 | TBC1D10C   | 3.41E+00 | 1.37E-02 | 3.10E-02 |
| ENSG00000279518 | AC083843.4 | 1.70E+00 | 1.37E-02 | 3.10E-02 |
| ENSG00000179406 | LINC00174  | 1.83E+00 | 1.37E-02 | 3.11E-02 |
| ENSG00000155754 | C2CD6      | 3.53E+00 | 1.38E-02 | 3.14E-02 |
| ENSG00000249346 | LINC01016  | 3.66E+00 | 1.38E-02 | 3.14E-02 |
| ENSG00000205212 | CCDC144NL  | 3.48E+00 | 1.39E-02 | 3.14E-02 |
| ENSG00000185499 | MUC1       | 1.35E+00 | 1.39E-02 | 3.14E-02 |
| ENSG00000161912 | ADCY10P1   | 1.37E+00 | 1.39E-02 | 3.15E-02 |
| ENSG00000206344 | HCG27      | 2.03E+00 | 1.39E-02 | 3.15E-02 |
| ENSG00000233058 | LINC00884  | 1.49E+00 | 1.39E-02 | 3.15E-02 |
| ENSG00000261730 | AL034346.1 | 3.12E+00 | 1.40E-02 | 3.17E-02 |
| ENSG00000273599 | AL731571.1 | 3.26E+00 | 1.41E-02 | 3.18E-02 |
| ENSG00000272054 | AC007390.2 | 1.64E+00 | 1.41E-02 | 3.18E-02 |
| ENSG00000205593 | DENND6B    | 1.59E+00 | 1.41E-02 | 3.19E-02 |
| ENSG00000117013 | KCNQ4      | 2.52E+00 | 1.41E-02 | 3.19E-02 |
| ENSG00000183208 | GDPGP1     | 1.40E+00 | 1.42E-02 | 3.20E-02 |
| ENSG00000163531 | NFASC      | 1.37E+00 | 1.43E-02 | 3.22E-02 |
| ENSG00000229414 | KCNQ1-AS1  | 3.85E+00 | 1.43E-02 | 3.23E-02 |
| ENSG00000157306 | ZFH2-AS1   | 1.08E+00 | 1.44E-02 | 3.26E-02 |
| ENSG00000273156 | AC124016.2 | 2.11E+00 | 1.47E-02 | 3.31E-02 |
| ENSG00000230387 | AL118508.1 | 4.17E+00 | 1.50E-02 | 3.37E-02 |
| ENSG00000203883 | SOX18      | 1.35E+00 | 1.50E-02 | 3.37E-02 |
| ENSG00000279474 | AC125437.2 | 2.08E+00 | 1.51E-02 | 3.39E-02 |
| ENSG00000072182 | ASIC4      | 2.99E+00 | 1.51E-02 | 3.39E-02 |
| ENSG00000176678 | FOXL1      | 1.83E+00 | 1.53E-02 | 3.43E-02 |
| ENSG00000173261 | PLAC8L1    | 3.26E+00 | 1.53E-02 | 3.43E-02 |
| ENSG00000235672 | AC090286.3 | 1.96E+00 | 1.54E-02 | 3.44E-02 |



|                 |            |          |          |          |
|-----------------|------------|----------|----------|----------|
| ENSG00000043591 | ADRB1      | 2.85E+00 | 1.55E-02 | 3.46E-02 |
| ENSG00000184349 | EFNA5      | 2.89E+00 | 1.55E-02 | 3.47E-02 |
| ENSG00000260459 | FTLP14     | 3.79E+00 | 1.56E-02 | 3.48E-02 |
| ENSG00000141401 | IMPA2      | 1.07E+00 | 1.56E-02 | 3.50E-02 |
| ENSG00000027869 | SH2D2A     | 2.70E+00 | 1.57E-02 | 3.50E-02 |
| ENSG00000240370 | RPL13P5    | 1.50E+00 | 1.57E-02 | 3.51E-02 |
| ENSG00000267206 | LCN6       | 3.40E+00 | 1.58E-02 | 3.52E-02 |
| ENSG00000235530 | AC087294.1 | 2.12E+00 | 1.58E-02 | 3.53E-02 |
| ENSG00000202111 | VTRNA1-2   | 2.03E+00 | 1.58E-02 | 3.53E-02 |
| ENSG00000232656 | IDI2-AS1   | 3.28E+00 | 1.59E-02 | 3.55E-02 |
| ENSG00000151690 | MFSD6      | 1.11E+00 | 1.60E-02 | 3.56E-02 |
| ENSG00000286261 | AC022137.3 | 2.17E+00 | 1.60E-02 | 3.57E-02 |
| ENSG00000168427 | KLHL30     | 2.24E+00 | 1.61E-02 | 3.58E-02 |
| ENSG00000173641 | HSPB7      | 3.39E+00 | 1.61E-02 | 3.59E-02 |
| ENSG00000127507 | ADGRE2     | 1.96E+00 | 1.62E-02 | 3.61E-02 |
| ENSG00000169894 | MUC3A      | 3.99E+00 | 1.64E-02 | 3.65E-02 |
| ENSG00000158315 | RHBDL2     | 2.29E+00 | 1.64E-02 | 3.65E-02 |
| ENSG00000186732 | MPPED1     | 3.48E+00 | 1.65E-02 | 3.66E-02 |
| ENSG00000274373 | AC148476.1 | 3.52E+00 | 1.65E-02 | 3.67E-02 |
| ENSG00000273796 | BX322562.1 | 2.19E+00 | 1.66E-02 | 3.68E-02 |
| ENSG00000165553 | NGB        | 2.99E+00 | 1.66E-02 | 3.69E-02 |
| ENSG00000260947 | AL356489.2 | 1.56E+00 | 1.67E-02 | 3.71E-02 |
| ENSG00000268751 | SCGB1B2P   | 1.32E+00 | 1.67E-02 | 3.71E-02 |
| ENSG00000176641 | RNF152     | 1.40E+00 | 1.68E-02 | 3.72E-02 |
| ENSG00000021488 | SLC7A9     | 3.11E+00 | 1.68E-02 | 3.72E-02 |
| ENSG00000261308 | FIGNL2     | 1.77E+00 | 1.69E-02 | 3.74E-02 |
| ENSG00000204511 | MCCD1      | 3.92E+00 | 1.69E-02 | 3.74E-02 |
| ENSG00000110195 | FOLR1      | 2.81E+00 | 1.69E-02 | 3.75E-02 |
| ENSG00000259100 | AL157791.1 | 3.33E+00 | 1.70E-02 | 3.76E-02 |
| ENSG00000229292 | RFPL4AL1   | 3.87E+00 | 1.70E-02 | 3.77E-02 |
| ENSG00000279529 | AC008764.8 | 1.77E+00 | 1.70E-02 | 3.77E-02 |
| ENSG00000118557 | PMFBP1     | 1.96E+00 | 1.71E-02 | 3.78E-02 |
| ENSG00000107742 | SPOCK2     | 2.06E+00 | 1.71E-02 | 3.79E-02 |
| ENSG00000266498 | AC055811.3 | 1.85E+00 | 1.72E-02 | 3.79E-02 |
| ENSG00000173267 | SNCG       | 1.21E+00 | 1.72E-02 | 3.81E-02 |
| ENSG00000176868 | AL358781.1 | 3.38E+00 | 1.73E-02 | 3.82E-02 |
| ENSG00000235449 | AC098934.3 | 2.73E+00 | 1.73E-02 | 3.82E-02 |
| ENSG00000284740 | AL645728.2 | 2.31E+00 | 1.73E-02 | 3.82E-02 |
| ENSG00000131480 | AOC2       | 1.79E+00 | 1.73E-02 | 3.82E-02 |
| ENSG00000125731 | SH2D3A     | 3.47E+00 | 1.74E-02 | 3.83E-02 |

|                 |            |          |          |          |
|-----------------|------------|----------|----------|----------|
| ENSG00000226453 | LINC02542  | 3.37E+00 | 1.74E-02 | 3.85E-02 |
| ENSG00000254703 | SENCR      | 1.77E+00 | 1.75E-02 | 3.87E-02 |
| ENSG00000251194 | AL133330.1 | 1.42E+00 | 1.76E-02 | 3.89E-02 |
| ENSG00000267430 | AC036176.2 | 2.41E+00 | 1.77E-02 | 3.91E-02 |
| ENSG00000102981 | PAR6A      | 2.14E+00 | 1.77E-02 | 3.91E-02 |
| ENSG00000135406 | PRPH       | 2.94E+00 | 1.78E-02 | 3.92E-02 |
| ENSG00000259947 | LINC02124  | 4.00E+00 | 1.78E-02 | 3.92E-02 |
| ENSG00000126500 | FLRT1      | 2.09E+00 | 1.79E-02 | 3.93E-02 |
| ENSG00000280138 | AC027290.2 | 1.25E+00 | 1.80E-02 | 3.96E-02 |
| ENSG00000275484 | AP003419.3 | 2.53E+00 | 1.81E-02 | 3.98E-02 |
| ENSG00000253210 | AC040970.1 | 2.06E+00 | 1.82E-02 | 3.99E-02 |
| ENSG00000175697 | GPR156     | 2.81E+00 | 1.82E-02 | 3.99E-02 |
| ENSG00000122852 | SFTPA1     | 3.26E+00 | 1.82E-02 | 3.99E-02 |
| ENSG00000227379 | PPIAP2     | 1.36E+00 | 1.82E-02 | 3.99E-02 |
| ENSG00000283361 | CFAP97D2   | 3.57E+00 | 1.84E-02 | 4.03E-02 |
| ENSG00000240405 | SAMMSON    | 3.60E+00 | 1.84E-02 | 4.04E-02 |
| ENSG00000274897 | PANO1      | 1.62E+00 | 1.84E-02 | 4.04E-02 |
| ENSG00000254573 | AP004550.1 | 3.40E+00 | 1.85E-02 | 4.05E-02 |
| ENSG00000177238 | TRIM72     | 3.44E+00 | 1.85E-02 | 4.06E-02 |
| ENSG00000273729 | AC007686.3 | 2.80E+00 | 1.85E-02 | 4.06E-02 |
| ENSG00000182950 | ODF3L1     | 2.78E+00 | 1.86E-02 | 4.07E-02 |
| ENSG00000260296 | AC095057.3 | 2.44E+00 | 1.86E-02 | 4.08E-02 |
| ENSG00000004939 | SLC4A1     | 3.61E+00 | 1.87E-02 | 4.08E-02 |
| ENSG00000256667 | KLRA1P     | 1.57E+00 | 1.88E-02 | 4.10E-02 |
| ENSG00000183666 | GUSBP1     | 1.09E+00 | 1.88E-02 | 4.11E-02 |
| ENSG00000272330 | AC002044.1 | 1.03E+00 | 1.89E-02 | 4.13E-02 |
| ENSG00000079393 | DUSP13     | 2.67E+00 | 1.89E-02 | 4.13E-02 |
| ENSG00000269318 | AC007292.2 | 2.39E+00 | 1.90E-02 | 4.16E-02 |
| ENSG00000186409 | CCDC30     | 1.92E+00 | 1.91E-02 | 4.17E-02 |
| ENSG00000079337 | RAPGEF3    | 2.23E+00 | 1.92E-02 | 4.19E-02 |
| ENSG00000279799 | AC006077.2 | 1.75E+00 | 1.94E-02 | 4.22E-02 |
| ENSG00000260750 | AC092720.1 | 3.10E+00 | 1.94E-02 | 4.23E-02 |
| ENSG00000272205 | AL451050.2 | 3.00E+00 | 1.95E-02 | 4.24E-02 |
| ENSG00000047617 | ANO2       | 2.48E+00 | 1.95E-02 | 4.25E-02 |
| ENSG00000253819 | LINC01151  | 2.94E+00 | 1.95E-02 | 4.25E-02 |
| ENSG00000273084 | AC092171.5 | 1.92E+00 | 1.96E-02 | 4.26E-02 |
| ENSG00000170370 | EMX2       | 3.84E+00 | 1.97E-02 | 4.29E-02 |
| ENSG00000226644 | AL121899.1 | 1.75E+00 | 1.97E-02 | 4.29E-02 |
| ENSG00000278192 | AL118505.1 | 4.03E+00 | 1.99E-02 | 4.32E-02 |
| ENSG00000123612 | ACVR1C     | 2.70E+00 | 1.99E-02 | 4.33E-02 |

|                 |            |          |          |          |
|-----------------|------------|----------|----------|----------|
| ENSG00000152433 | ZNF547     | 1.15E+00 | 2.01E-02 | 4.37E-02 |
| ENSG00000148483 | TMEM236    | 3.98E+00 | 2.01E-02 | 4.37E-02 |
| ENSG00000215089 | KRT18P11   | 1.01E+00 | 2.02E-02 | 4.37E-02 |
| ENSG00000228801 | AC064807.1 | 1.04E+00 | 2.02E-02 | 4.39E-02 |
| ENSG00000223774 | AL513217.1 | 2.34E+00 | 2.03E-02 | 4.41E-02 |
| ENSG00000260646 | AL031705.1 | 3.32E+00 | 2.04E-02 | 4.42E-02 |
| ENSG00000143382 | ADAMTSL4   | 1.66E+00 | 2.05E-02 | 4.43E-02 |
| ENSG00000187867 | PALM3      | 1.14E+00 | 2.06E-02 | 4.46E-02 |
| ENSG00000154553 | PDLIM3     | 1.08E+00 | 2.07E-02 | 4.48E-02 |
| ENSG00000100399 | CHADL      | 2.49E+00 | 2.08E-02 | 4.49E-02 |
| ENSG00000184497 | TMEM255B   | 1.03E+00 | 2.10E-02 | 4.54E-02 |
| ENSG00000181284 | TMEM102    | 1.84E+00 | 2.10E-02 | 4.54E-02 |
| ENSG00000197616 | MYH6       | 3.20E+00 | 2.10E-02 | 4.54E-02 |
| ENSG00000185905 | C16orf54   | 3.88E+00 | 2.10E-02 | 4.54E-02 |
| ENSG00000137270 | GCM1       | 2.80E+00 | 2.10E-02 | 4.54E-02 |
| ENSG00000275894 | AL021578.1 | 2.14E+00 | 2.11E-02 | 4.54E-02 |
| ENSG00000261253 | AC137932.2 | 3.18E+00 | 2.11E-02 | 4.55E-02 |
| ENSG00000152779 | SLC16A12   | 1.59E+00 | 2.12E-02 | 4.57E-02 |
| ENSG00000138735 | PDE5A      | 1.04E+00 | 2.12E-02 | 4.57E-02 |
| ENSG00000183682 | BMP8A      | 2.33E+00 | 2.14E-02 | 4.61E-02 |
| ENSG00000237452 | BHMG1      | 3.42E+00 | 2.14E-02 | 4.62E-02 |
| ENSG00000177628 | GBA        | 1.96E+00 | 2.15E-02 | 4.62E-02 |
| ENSG00000274678 | AC106886.3 | 3.18E+00 | 2.15E-02 | 4.62E-02 |
| ENSG00000234009 | RPL5P34    | 2.09E+00 | 2.18E-02 | 4.68E-02 |
| ENSG00000276744 | AC105137.2 | 2.78E+00 | 2.18E-02 | 4.69E-02 |
| ENSG00000168484 | SFTPC      | 2.38E+00 | 2.19E-02 | 4.70E-02 |
| ENSG00000162438 | CTRC       | 2.89E+00 | 2.21E-02 | 4.74E-02 |
| ENSG00000158764 | ITLN2      | 3.16E+00 | 2.22E-02 | 4.76E-02 |
| ENSG00000228242 | AC093495.1 | 2.62E+00 | 2.22E-02 | 4.77E-02 |
| ENSG00000159208 | CIART      | 1.22E+00 | 2.23E-02 | 4.78E-02 |
| ENSG00000159337 | PLA2G4D    | 3.25E+00 | 2.23E-02 | 4.79E-02 |
| ENSG00000256443 | AP003559.1 | 3.33E+00 | 2.24E-02 | 4.80E-02 |
| ENSG00000198203 | SULT1C2    | 2.64E+00 | 2.24E-02 | 4.80E-02 |
| ENSG00000196132 | MYT1       | 1.54E+00 | 2.25E-02 | 4.82E-02 |
| ENSG00000082196 | C1QTNF3    | 2.06E+00 | 2.27E-02 | 4.85E-02 |
| ENSG00000137841 | PLCB2      | 2.43E+00 | 2.27E-02 | 4.85E-02 |
| ENSG00000259642 | ST20-AS1   | 1.34E+00 | 2.27E-02 | 4.86E-02 |
| ENSG00000287222 | AC234917.3 | 1.43E+00 | 2.27E-02 | 4.86E-02 |
| ENSG00000142233 | NTN5       | 3.25E+00 | 2.27E-02 | 4.86E-02 |
| ENSG00000225914 | TSBP1-AS1  | 2.76E+00 | 2.28E-02 | 4.88E-02 |

|                 |            |          |          |          |
|-----------------|------------|----------|----------|----------|
| ENSG00000160678 | S100A1     | 2.11E+00 | 2.28E-02 | 4.88E-02 |
| ENSG00000231133 | HAR1B      | 2.57E+00 | 2.29E-02 | 4.89E-02 |
| ENSG00000274292 | AC084018.2 | 1.83E+00 | 2.29E-02 | 4.90E-02 |
| ENSG00000213300 | HNRNPA3P6  | 2.43E+00 | 2.30E-02 | 4.92E-02 |
| ENSG00000143851 | PTPN7      | 2.82E+00 | 2.31E-02 | 4.94E-02 |
| ENSG00000122735 | DNAI1      | 2.74E+00 | 2.32E-02 | 4.94E-02 |
| ENSG00000126895 | AVPR2      | 2.91E+00 | 2.32E-02 | 4.94E-02 |
| ENSG00000263011 | AC108134.4 | 2.50E+00 | 2.32E-02 | 4.96E-02 |
| ENSG00000105697 | HAMP       | 3.83E+00 | 2.32E-02 | 4.96E-02 |

**Supplementary table 8. Significant DRGs in Ad-KLF4 versus Ad-EGFP transduced samples.**

| Gene ID         | Gene name | Log2(FC)  | P value   | FDR       |
|-----------------|-----------|-----------|-----------|-----------|
| ENSG00000120708 | TGFBI     | -2.44E+00 | 3.34E-150 | 2.92E-147 |
| ENSG00000128050 | PAICS     | -2.57E+00 | 1.17E-140 | 8.92E-138 |
| ENSG00000003436 | TFPI      | -3.52E+00 | 1.16E-134 | 7.61E-132 |
| ENSG00000115414 | FN1       | -2.65E+00 | 3.43E-122 | 1.80E-119 |
| ENSG00000140416 | TPM1      | -2.03E+00 | 2.40E-116 | 9.81E-114 |
| ENSG00000166741 | NNMT      | -3.82E+00 | 6.23E-116 | 2.49E-113 |
| ENSG00000277443 | MARCKS    | -2.16E+00 | 2.92E-105 | 9.92E-103 |
| ENSG00000101335 | MYL9      | -3.38E+00 | 1.27E-99  | 4.01E-97  |
| ENSG00000133110 | POSTN     | -4.66E+00 | 1.17E-93  | 3.25E-91  |
| ENSG00000156804 | FBXO32    | -3.29E+00 | 4.60E-89  | 1.13E-86  |
| ENSG00000165512 | ZNF22     | -3.36E+00 | 1.98E-87  | 4.67E-85  |
| ENSG00000137801 | THBS1     | -2.94E+00 | 2.58E-83  | 5.72E-81  |
| ENSG00000122884 | P4HA1     | -1.79E+00 | 9.96E-80  | 1.99E-77  |
| ENSG00000162692 | VCAM1     | -7.38E+00 | 2.20E-77  | 4.04E-75  |
| ENSG00000152952 | PLOD2     | -1.91E+00 | 3.96E-75  | 6.80E-73  |
| ENSG00000105137 | SYDE1     | -3.33E+00 | 1.19E-71  | 1.96E-69  |
| ENSG00000122786 | CALD1     | -1.80E+00 | 3.64E-70  | 5.91E-68  |
| ENSG00000128606 | LRRC17    | -2.99E+00 | 4.04E-70  | 6.51E-68  |
| ENSG00000128989 | ARPP19    | -2.28E+00 | 1.41E-68  | 2.16E-66  |
| ENSG00000135486 | HNRNPA1   | -1.23E+00 | 1.16E-67  | 1.72E-65  |
| ENSG00000117519 | CNN3      | -1.92E+00 | 6.97E-65  | 9.22E-63  |
| ENSG00000122641 | INHBA     | -3.19E+00 | 1.35E-63  | 1.71E-61  |
| ENSG00000178860 | MSC       | -5.62E+00 | 4.33E-63  | 5.38E-61  |
| ENSG00000146729 | NIPSNAP2  | -3.84E+00 | 5.91E-63  | 7.29E-61  |
| ENSG00000185551 | NR2F2     | -2.32E+00 | 5.86E-61  | 6.72E-59  |
| ENSG00000004478 | FKBP4     | -1.65E+00 | 2.44E-60  | 2.75E-58  |
| ENSG00000118523 | CCN2      | -3.03E+00 | 3.23E-60  | 3.62E-58  |
| ENSG00000106484 | MEST      | -2.67E+00 | 8.72E-60  | 9.48E-58  |
| ENSG00000138385 | SSB       | -1.71E+00 | 3.42E-59  | 3.63E-57  |
| ENSG00000160991 | ORAI2     | -2.47E+00 | 1.63E-57  | 1.65E-55  |
| ENSG00000131378 | RFTN1     | -3.11E+00 | 3.15E-57  | 3.14E-55  |
| ENSG00000119403 | PHF19     | -2.13E+00 | 1.88E-56  | 1.83E-54  |
| ENSG00000041982 | TNC       | -4.52E+00 | 2.47E-56  | 2.39E-54  |
| ENSG00000111716 | LDHB      | -2.21E+00 | 4.12E-56  | 3.96E-54  |
| ENSG00000134333 | LDHA      | -1.77E+00 | 1.93E-55  | 1.81E-53  |
| ENSG00000057019 | DCBLD2    | -1.63E+00 | 3.15E-55  | 2.93E-53  |
| ENSG00000100345 | MYH9      | -2.12E+00 | 4.46E-55  | 4.14E-53  |
| ENSG00000164104 | HMGB2     | -1.11E+00 | 5.49E-55  | 5.06E-53  |

|                 |         |           |          |          |
|-----------------|---------|-----------|----------|----------|
| ENSG00000106799 | TGFBR1  | -2.58E+00 | 1.72E-54 | 1.58E-52 |
| ENSG00000170558 | CDH2    | -2.23E+00 | 2.73E-54 | 2.46E-52 |
| ENSG00000101361 | NOP56   | -1.83E+00 | 4.85E-54 | 4.35E-52 |
| ENSG00000130826 | DKC1    | -2.08E+00 | 1.25E-52 | 1.09E-50 |
| ENSG00000152795 | HNRNPDL | -1.19E+00 | 2.37E-52 | 2.04E-50 |
| ENSG00000115380 | EFEMP1  | -2.38E+00 | 4.56E-52 | 3.88E-50 |
| ENSG00000132780 | NASP    | -1.64E+00 | 1.41E-51 | 1.19E-49 |
| ENSG00000213160 | KLHL23  | -3.03E+00 | 6.49E-51 | 5.37E-49 |
| ENSG00000163017 | ACTG2   | -5.58E+00 | 7.77E-51 | 6.35E-49 |
| ENSG00000122406 | RPL5    | -1.83E+00 | 2.87E-50 | 2.27E-48 |
| ENSG00000080608 | PUM3    | -2.33E+00 | 1.11E-48 | 8.55E-47 |
| ENSG00000117020 | AKT3    | -2.11E+00 | 1.65E-48 | 1.27E-46 |
| ENSG00000143228 | NUF2    | -1.94E+00 | 3.43E-48 | 2.56E-46 |
| ENSG00000143401 | ANP32E  | -1.84E+00 | 8.64E-48 | 6.43E-46 |
| ENSG00000104408 | EIF3E   | -1.27E+00 | 4.94E-47 | 3.58E-45 |
| ENSG00000113758 | DBN1    | -2.44E+00 | 7.25E-47 | 5.16E-45 |
| ENSG00000010292 | NCAPD2  | -1.74E+00 | 7.90E-47 | 5.58E-45 |
| ENSG00000075142 | SRI     | -2.71E+00 | 1.49E-46 | 1.04E-44 |
| ENSG00000134013 | LOXL2   | -2.26E+00 | 1.82E-46 | 1.27E-44 |
| ENSG00000113721 | PDGFRB  | -3.12E+00 | 9.42E-46 | 6.48E-44 |
| ENSG00000152558 | TMEM123 | -2.09E+00 | 2.98E-45 | 2.02E-43 |
| ENSG00000102172 | SMS     | -2.11E+00 | 4.86E-45 | 3.28E-43 |
| ENSG00000134057 | CCNB1   | -1.85E+00 | 4.92E-45 | 3.31E-43 |
| ENSG00000114446 | IFT57   | -1.88E+00 | 7.75E-45 | 5.14E-43 |
| ENSG00000101255 | TRIB3   | -2.84E+00 | 1.14E-44 | 7.56E-43 |
| ENSG00000114450 | GNB4    | -2.26E+00 | 6.80E-44 | 4.31E-42 |
| ENSG00000072958 | AP1M1   | -2.19E+00 | 1.24E-43 | 7.71E-42 |
| ENSG00000235531 | MSC-AS1 | -2.80E+00 | 5.52E-43 | 3.34E-41 |
| ENSG00000114251 | WNT5A   | -1.83E+00 | 9.33E-43 | 5.58E-41 |
| ENSG00000064102 | INTS13  | -1.63E+00 | 1.26E-42 | 7.48E-41 |
| ENSG00000107833 | NPM3    | -3.10E+00 | 1.32E-42 | 7.80E-41 |
| ENSG00000162614 | NEXN    | -2.75E+00 | 2.06E-42 | 1.21E-40 |
| ENSG00000144381 | HSPD1   | -1.10E+00 | 2.28E-42 | 1.34E-40 |
| ENSG00000165704 | HPRT1   | -2.02E+00 | 6.89E-42 | 3.98E-40 |
| ENSG00000155189 | AGPAT5  | -1.34E+00 | 1.69E-41 | 9.50E-40 |
| ENSG00000166681 | BEX3    | -2.32E+00 | 2.69E-41 | 1.49E-39 |
| ENSG00000168685 | IL7R    | -4.46E+00 | 6.69E-41 | 3.67E-39 |
| ENSG00000186470 | BTN3A2  | -2.96E+00 | 7.85E-41 | 4.29E-39 |
| ENSG00000157500 | APPL1   | -2.54E+00 | 1.50E-40 | 8.06E-39 |
| ENSG00000058056 | USP13   | -2.54E+00 | 4.57E-40 | 2.40E-38 |

|                 |          |           |          |          |
|-----------------|----------|-----------|----------|----------|
| ENSG00000116251 | RPL22    | -1.91E+00 | 5.27E-40 | 2.76E-38 |
| ENSG00000000003 | TSPAN6   | -2.06E+00 | 1.02E-39 | 5.29E-38 |
| ENSG00000069275 | NUCKS1   | -1.29E+00 | 2.57E-39 | 1.32E-37 |
| ENSG00000074219 | TEAD2    | -3.04E+00 | 4.36E-39 | 2.22E-37 |
| ENSG00000164932 | CTHRC1   | -4.45E+00 | 4.38E-39 | 2.22E-37 |
| ENSG00000144642 | RBMS3    | -3.59E+00 | 4.71E-39 | 2.37E-37 |
| ENSG00000179222 | MAGED1   | -1.49E+00 | 8.10E-39 | 4.05E-37 |
| ENSG00000198034 | RPS4X    | -1.56E+00 | 8.21E-39 | 4.09E-37 |
| ENSG00000121152 | NCAPH    | -2.07E+00 | 4.73E-38 | 2.27E-36 |
| ENSG00000103485 | QPRT     | -3.04E+00 | 5.51E-38 | 2.64E-36 |
| ENSG00000176014 | TUBB6    | -1.89E+00 | 8.10E-38 | 3.85E-36 |
| ENSG00000184220 | CMSS1    | -1.81E+00 | 1.63E-37 | 7.56E-36 |
| ENSG00000159164 | SV2A     | -2.13E+00 | 2.16E-37 | 9.93E-36 |
| ENSG00000136026 | CKAP4    | -1.37E+00 | 5.54E-37 | 2.49E-35 |
| ENSG00000115561 | CHMP3    | -1.81E+00 | 7.34E-37 | 3.27E-35 |
| ENSG00000108691 | CCL2     | -8.16E+00 | 1.22E-36 | 5.39E-35 |
| ENSG00000149591 | TAGLN    | -3.28E+00 | 1.33E-36 | 5.84E-35 |
| ENSG00000178035 | IMPDH2   | -1.54E+00 | 1.62E-36 | 7.09E-35 |
| ENSG00000204856 | FAM216A  | -3.45E+00 | 1.71E-36 | 7.47E-35 |
| ENSG00000145934 | TENM2    | -4.03E+00 | 1.92E-36 | 8.37E-35 |
| ENSG00000180340 | FZD2     | -3.17E+00 | 4.99E-36 | 2.13E-34 |
| ENSG00000181588 | MEX3D    | -1.77E+00 | 5.27E-36 | 2.25E-34 |
| ENSG00000141522 | ARHGDI A | -1.52E+00 | 5.89E-36 | 2.51E-34 |
| ENSG00000165801 | ARHGEF40 | -2.48E+00 | 5.92E-36 | 2.51E-34 |
| ENSG00000147687 | TATDN1   | -2.43E+00 | 1.87E-35 | 7.83E-34 |
| ENSG00000154096 | THY1     | -2.76E+00 | 1.88E-35 | 7.85E-34 |
| ENSG00000171951 | SCG2     | -5.57E+00 | 3.29E-35 | 1.35E-33 |
| ENSG00000105202 | FBL      | -1.69E+00 | 1.12E-34 | 4.53E-33 |
| ENSG00000145386 | CCNA2    | -1.49E+00 | 3.14E-34 | 1.24E-32 |
| ENSG00000164649 | CDCA7L   | -2.11E+00 | 4.80E-34 | 1.88E-32 |
| ENSG00000164292 | RHOBTB3  | -2.81E+00 | 5.94E-34 | 2.32E-32 |
| ENSG00000103202 | NME4     | -3.20E+00 | 8.97E-34 | 3.47E-32 |
| ENSG00000167552 | TUBA1A   | -1.71E+00 | 1.60E-33 | 6.14E-32 |
| ENSG00000105849 | TWISTNB  | -1.94E+00 | 1.79E-33 | 6.83E-32 |
| ENSG00000186185 | KIF18B   | -2.19E+00 | 2.84E-33 | 1.07E-31 |
| ENSG00000152556 | PFKM     | -2.23E+00 | 4.01E-33 | 1.50E-31 |
| ENSG00000137154 | RPS6     | -1.53E+00 | 4.83E-33 | 1.81E-31 |
| ENSG00000099194 | SCD      | -1.39E+00 | 4.87E-33 | 1.81E-31 |
| ENSG00000072042 | RDH11    | -1.39E+00 | 8.24E-33 | 3.05E-31 |
| ENSG00000115594 | IL1R1    | -3.25E+00 | 8.47E-33 | 3.12E-31 |

|                 |          |           |          |          |
|-----------------|----------|-----------|----------|----------|
| ENSG00000109805 | NCAPG    | -1.48E+00 | 8.54E-33 | 3.14E-31 |
| ENSG00000114023 | FAM162A  | -2.01E+00 | 1.12E-32 | 4.11E-31 |
| ENSG00000118418 | HMG3     | -2.19E+00 | 1.45E-32 | 5.33E-31 |
| ENSG00000206053 | JPT2     | -1.45E+00 | 1.58E-32 | 5.76E-31 |
| ENSG00000143799 | PARP1    | -1.35E+00 | 3.45E-32 | 1.22E-30 |
| ENSG00000055044 | NOP58    | -1.13E+00 | 6.43E-32 | 2.25E-30 |
| ENSG00000128283 | CDC42EP1 | -2.34E+00 | 1.01E-31 | 3.49E-30 |
| ENSG00000100316 | RPL3     | -1.18E+00 | 1.24E-31 | 4.26E-30 |
| ENSG00000182985 | CADM1    | -2.19E+00 | 1.87E-31 | 6.37E-30 |
| ENSG00000196628 | TCF4     | -2.69E+00 | 2.09E-31 | 7.13E-30 |
| ENSG00000134294 | SLC38A2  | -1.26E+00 | 2.27E-31 | 7.72E-30 |
| ENSG00000101447 | FAM83D   | -1.58E+00 | 2.34E-31 | 7.94E-30 |
| ENSG00000071539 | TRIP13   | -1.53E+00 | 3.06E-31 | 1.03E-29 |
| ENSG00000198755 | RPL10A   | -1.68E+00 | 3.21E-31 | 1.08E-29 |
| ENSG00000105255 | FSD1     | -2.21E+00 | 3.28E-31 | 1.10E-29 |
| ENSG00000084112 | SSH1     | -1.92E+00 | 4.09E-31 | 1.36E-29 |
| ENSG00000164109 | MAD2L1   | -1.66E+00 | 4.49E-31 | 1.49E-29 |
| ENSG00000152990 | ADGRA3   | -2.50E+00 | 6.59E-31 | 2.18E-29 |
| ENSG00000134986 | NREP     | -6.29E+00 | 1.32E-30 | 4.27E-29 |
| ENSG00000077150 | NFKB2    | -1.73E+00 | 1.50E-30 | 4.84E-29 |
| ENSG00000113368 | LMNB1    | -1.92E+00 | 2.54E-30 | 8.07E-29 |
| ENSG00000111799 | COL12A1  | -3.94E+00 | 2.98E-30 | 9.44E-29 |
| ENSG00000196715 | VKORC1L1 | -2.19E+00 | 6.99E-30 | 2.18E-28 |
| ENSG00000116005 | PCYOX1   | -1.87E+00 | 9.02E-30 | 2.79E-28 |
| ENSG00000196700 | ZNF512B  | -3.01E+00 | 1.69E-29 | 5.21E-28 |
| ENSG00000135698 | MPHOSPH6 | -1.76E+00 | 4.39E-29 | 1.33E-27 |
| ENSG00000089351 | GRAMD1A  | -1.88E+00 | 5.12E-29 | 1.54E-27 |
| ENSG00000105185 | PDCD5    | -2.37E+00 | 5.62E-29 | 1.68E-27 |
| ENSG00000069998 | HDHD5    | -1.79E+00 | 6.07E-29 | 1.81E-27 |
| ENSG00000105825 | TFPI2    | -4.20E+00 | 6.61E-29 | 1.96E-27 |
| ENSG00000123131 | PRDX4    | -1.96E+00 | 6.62E-29 | 1.96E-27 |
| ENSG00000039560 | RAI14    | -1.72E+00 | 8.68E-29 | 2.56E-27 |
| ENSG00000167635 | ZNF146   | -1.37E+00 | 9.59E-29 | 2.81E-27 |
| ENSG00000189403 | HMGB1    | -1.01E+00 | 1.00E-28 | 2.94E-27 |
| ENSG00000225663 | MCRIP1   | -3.81E+00 | 1.04E-28 | 3.05E-27 |
| ENSG00000196363 | WDR5     | -2.37E+00 | 1.12E-28 | 3.28E-27 |
| ENSG00000198796 | ALPK2    | -3.43E+00 | 1.20E-28 | 3.49E-27 |
| ENSG00000126457 | PRMT1    | -1.96E+00 | 1.39E-28 | 4.01E-27 |
| ENSG00000197894 | ADH5     | -1.79E+00 | 1.44E-28 | 4.15E-27 |
| ENSG00000136490 | LIMD2    | -3.18E+00 | 2.38E-28 | 6.79E-27 |



|                 |          |           |          |          |
|-----------------|----------|-----------|----------|----------|
| ENSG00000122565 | CBX3     | -1.45E+00 | 3.97E-28 | 1.12E-26 |
| ENSG00000121940 | CLCC1    | -3.14E+00 | 9.01E-28 | 2.52E-26 |
| ENSG00000159128 | IFNGR2   | -1.88E+00 | 9.07E-28 | 2.54E-26 |
| ENSG00000111275 | ALDH2    | -2.33E+00 | 1.29E-27 | 3.58E-26 |
| ENSG00000135074 | ADAM19   | -2.28E+00 | 1.42E-27 | 3.91E-26 |
| ENSG00000178921 | PFAS     | -2.52E+00 | 1.52E-27 | 4.18E-26 |
| ENSG00000163938 | GNL3     | -1.32E+00 | 2.52E-27 | 6.86E-26 |
| ENSG00000104884 | ERCC2    | -2.37E+00 | 2.64E-27 | 7.16E-26 |
| ENSG00000131238 | PPT1     | -1.29E+00 | 2.95E-27 | 7.97E-26 |
| ENSG00000159131 | GART     | -1.26E+00 | 3.46E-27 | 9.36E-26 |
| ENSG00000173511 | VEGFB    | -3.11E+00 | 3.79E-27 | 1.02E-25 |
| ENSG00000145425 | RPS3A    | -1.71E+00 | 3.96E-27 | 1.06E-25 |
| ENSG00000136261 | BZW2     | -2.16E+00 | 4.06E-27 | 1.09E-25 |
| ENSG00000128602 | SMO      | -2.82E+00 | 4.81E-27 | 1.28E-25 |
| ENSG00000026559 | KCNG1    | -1.64E+00 | 4.97E-27 | 1.32E-25 |
| ENSG00000182054 | IDH2     | -1.99E+00 | 7.63E-27 | 2.02E-25 |
| ENSG00000117228 | GBP1     | -1.60E+00 | 8.06E-27 | 2.13E-25 |
| ENSG00000146281 | PM20D2   | -2.11E+00 | 8.33E-27 | 2.20E-25 |
| ENSG00000117650 | NEK2     | -1.65E+00 | 1.60E-26 | 4.17E-25 |
| ENSG00000111252 | SH2B3    | -2.67E+00 | 1.79E-26 | 4.67E-25 |
| ENSG00000255302 | EID1     | -1.18E+00 | 2.80E-26 | 7.23E-25 |
| ENSG00000076248 | UNG      | -1.55E+00 | 3.23E-26 | 8.31E-25 |
| ENSG00000139684 | ESD      | -1.99E+00 | 4.14E-26 | 1.06E-24 |
| ENSG00000142945 | KIF2C    | -1.63E+00 | 4.28E-26 | 1.09E-24 |
| ENSG00000163661 | PTX3     | -2.68E+00 | 4.33E-26 | 1.10E-24 |
| ENSG00000163535 | SGO2     | -2.15E+00 | 5.62E-26 | 1.43E-24 |
| ENSG00000145907 | G3BP1    | -1.14E+00 | 6.81E-26 | 1.73E-24 |
| ENSG00000112984 | KIF20A   | -2.02E+00 | 7.21E-26 | 1.82E-24 |
| ENSG00000183098 | GPC6     | -4.53E+00 | 7.51E-26 | 1.89E-24 |
| ENSG00000175792 | RUVBL1   | -1.60E+00 | 1.13E-25 | 2.81E-24 |
| ENSG00000148677 | ANKRD1   | -4.43E+00 | 1.81E-25 | 4.46E-24 |
| ENSG00000126787 | DLGAP5   | -1.74E+00 | 2.28E-25 | 5.58E-24 |
| ENSG00000184117 | NIPSNAP1 | -3.19E+00 | 3.06E-25 | 7.43E-24 |
| ENSG00000134072 | CAMK1    | -3.38E+00 | 4.01E-25 | 9.72E-24 |
| ENSG00000080573 | COL5A3   | -2.41E+00 | 4.03E-25 | 9.76E-24 |
| ENSG00000132541 | RIDA     | -2.22E+00 | 4.15E-25 | 1.00E-23 |
| ENSG00000168542 | COL3A1   | -2.42E+00 | 6.64E-25 | 1.59E-23 |
| ENSG00000073111 | MCM2     | -1.35E+00 | 8.38E-25 | 2.00E-23 |
| ENSG00000147274 | RBMX     | -1.10E+00 | 8.70E-25 | 2.07E-23 |
| ENSG00000165283 | STOML2   | -1.87E+00 | 8.70E-25 | 2.07E-23 |

|                 |           |           |          |          |
|-----------------|-----------|-----------|----------|----------|
| ENSG00000140350 | ANP32A    | -1.22E+00 | 9.18E-25 | 2.18E-23 |
| ENSG00000101346 | POFUT1    | -1.19E+00 | 1.27E-24 | 3.00E-23 |
| ENSG00000115053 | NCL       | -1.16E+00 | 1.33E-24 | 3.11E-23 |
| ENSG00000080200 | CRYBG3    | -2.25E+00 | 1.41E-24 | 3.30E-23 |
| ENSG00000146416 | AIG1      | -3.06E+00 | 1.45E-24 | 3.40E-23 |
| ENSG00000141905 | NFIC      | -1.59E+00 | 1.60E-24 | 3.74E-23 |
| ENSG00000150630 | VEGFC     | -2.88E+00 | 2.35E-24 | 5.44E-23 |
| ENSG00000143815 | LBR       | -1.41E+00 | 2.70E-24 | 6.21E-23 |
| ENSG00000176171 | BNIP3     | -2.59E+00 | 3.43E-24 | 7.82E-23 |
| ENSG00000161970 | RPL26     | -2.32E+00 | 3.47E-24 | 7.89E-23 |
| ENSG00000044459 | CNTLN     | -1.74E+00 | 3.51E-24 | 7.97E-23 |
| ENSG00000142676 | RPL11     | -1.52E+00 | 3.61E-24 | 8.20E-23 |
| ENSG00000126602 | TRAP1     | -1.75E+00 | 4.00E-24 | 9.05E-23 |
| ENSG00000168268 | NT5DC2    | -1.63E+00 | 4.27E-24 | 9.63E-23 |
| ENSG00000087586 | AURKA     | -1.60E+00 | 4.75E-24 | 1.07E-22 |
| ENSG00000123975 | CKS2      | -2.47E+00 | 4.83E-24 | 1.09E-22 |
| ENSG00000198830 | HMG2N     | -1.85E+00 | 6.33E-24 | 1.42E-22 |
| ENSG00000116120 | FARSB     | -2.00E+00 | 6.45E-24 | 1.44E-22 |
| ENSG00000204262 | COL5A2    | -1.53E+00 | 6.59E-24 | 1.47E-22 |
| ENSG00000148848 | ADAM12    | -1.98E+00 | 6.89E-24 | 1.54E-22 |
| ENSG00000141030 | COPS3     | -1.05E+00 | 7.42E-24 | 1.65E-22 |
| ENSG00000100644 | HIF1A     | -1.00E+00 | 7.66E-24 | 1.70E-22 |
| ENSG00000181163 | NPM1      | -1.36E+00 | 8.49E-24 | 1.89E-22 |
| ENSG00000163808 | KIF15     | -1.98E+00 | 8.72E-24 | 1.93E-22 |
| ENSG00000153993 | SEMA3D    | -2.36E+00 | 1.11E-23 | 2.43E-22 |
| ENSG00000132639 | SNAP25    | -3.56E+00 | 1.20E-23 | 2.63E-22 |
| ENSG00000123179 | EBPL      | -2.51E+00 | 1.82E-23 | 3.94E-22 |
| ENSG00000182199 | SHMT2     | -1.06E+00 | 2.10E-23 | 4.53E-22 |
| ENSG00000135624 | CCT7      | -1.20E+00 | 2.89E-23 | 6.21E-22 |
| ENSG00000145220 | LYAR      | -1.27E+00 | 2.98E-23 | 6.37E-22 |
| ENSG00000145604 | SKP2      | -1.91E+00 | 3.33E-23 | 7.10E-22 |
| ENSG00000153936 | HS2ST1    | -1.47E+00 | 3.49E-23 | 7.43E-22 |
| ENSG00000196531 | NACA      | -1.11E+00 | 6.74E-23 | 1.42E-21 |
| ENSG00000058804 | NDC1      | -1.89E+00 | 7.86E-23 | 1.64E-21 |
| ENSG00000137076 | TLN1      | -1.85E+00 | 8.01E-23 | 1.67E-21 |
| ENSG00000128059 | PPAT      | -1.76E+00 | 8.26E-23 | 1.72E-21 |
| ENSG00000100526 | CDKN3     | -1.87E+00 | 8.47E-23 | 1.76E-21 |
| ENSG00000006634 | DBF4      | -1.52E+00 | 8.78E-23 | 1.83E-21 |
| ENSG00000198826 | ARHGAP11A | -1.48E+00 | 1.00E-22 | 2.08E-21 |
| ENSG00000111450 | STX2      | -2.56E+00 | 1.25E-22 | 2.58E-21 |

|                 |          |           |          |          |
|-----------------|----------|-----------|----------|----------|
| ENSG00000132341 | RAN      | -1.29E+00 | 1.26E-22 | 2.59E-21 |
| ENSG00000026025 | VIM      | -1.75E+00 | 1.28E-22 | 2.63E-21 |
| ENSG00000104332 | SFRP1    | -1.64E+00 | 1.31E-22 | 2.68E-21 |
| ENSG00000139793 | MBNL2    | -1.91E+00 | 1.39E-22 | 2.83E-21 |
| ENSG00000146376 | ARHGAP18 | -2.73E+00 | 1.49E-22 | 3.04E-21 |
| ENSG00000023608 | SNAPC1   | -1.31E+00 | 1.82E-22 | 3.69E-21 |
| ENSG00000196465 | MYL6B    | -2.26E+00 | 2.41E-22 | 4.86E-21 |
| ENSG00000178105 | DDX10    | -2.16E+00 | 3.58E-22 | 7.15E-21 |
| ENSG00000147604 | RPL7     | -1.13E+00 | 3.62E-22 | 7.21E-21 |
| ENSG00000100413 | POLR3H   | -1.45E+00 | 4.18E-22 | 8.31E-21 |
| ENSG00000029993 | HMGB3    | -1.19E+00 | 4.82E-22 | 9.56E-21 |
| ENSG00000183527 | PSMG1    | -2.08E+00 | 5.47E-22 | 1.08E-20 |
| ENSG00000271601 | LIX1L    | -1.73E+00 | 8.13E-22 | 1.61E-20 |
| ENSG00000180198 | RCC1     | -1.80E+00 | 8.20E-22 | 1.62E-20 |
| ENSG00000077348 | EXOSC5   | -2.96E+00 | 8.84E-22 | 1.74E-20 |
| ENSG00000184838 | PRR16    | -5.39E+00 | 8.84E-22 | 1.74E-20 |
| ENSG00000182718 | ANXA2    | -1.14E+00 | 8.90E-22 | 1.74E-20 |
| ENSG00000186468 | RPS23    | -1.83E+00 | 1.07E-21 | 2.10E-20 |
| ENSG00000138074 | SLC5A6   | -1.94E+00 | 1.08E-21 | 2.12E-20 |
| ENSG00000089009 | RPL6     | -1.16E+00 | 1.28E-21 | 2.49E-20 |
| ENSG00000092096 | SLC22A17 | -2.06E+00 | 1.46E-21 | 2.83E-20 |
| ENSG00000125148 | MT2A     | -3.00E+00 | 1.64E-21 | 3.17E-20 |
| ENSG00000101189 | MRGBP    | -1.53E+00 | 1.76E-21 | 3.39E-20 |
| ENSG00000129128 | SPCS3    | -1.19E+00 | 1.81E-21 | 3.48E-20 |
| ENSG0000015475  | BID      | -3.23E+00 | 1.85E-21 | 3.56E-20 |
| ENSG00000180801 | ARSJ     | -2.20E+00 | 2.39E-21 | 4.56E-20 |
| ENSG00000111859 | NEDD9    | -2.72E+00 | 2.86E-21 | 5.44E-20 |
| ENSG00000099250 | NRP1     | -2.19E+00 | 3.49E-21 | 6.59E-20 |
| ENSG00000149273 | RPS3     | -1.81E+00 | 3.51E-21 | 6.61E-20 |
| ENSG00000164294 | GPX8     | -1.17E+00 | 4.85E-21 | 9.04E-20 |
| ENSG00000127863 | TNFRSF19 | -3.42E+00 | 6.19E-21 | 1.15E-19 |
| ENSG00000157456 | CCNB2    | -1.38E+00 | 6.98E-21 | 1.29E-19 |
| ENSG00000170854 | RIOX2    | -2.25E+00 | 7.08E-21 | 1.31E-19 |
| ENSG00000197498 | RPF2     | -1.32E+00 | 8.70E-21 | 1.60E-19 |
| ENSG00000114861 | FOXP1    | -1.73E+00 | 8.87E-21 | 1.63E-19 |
| ENSG00000157350 | ST3GAL2  | -1.11E+00 | 9.10E-21 | 1.67E-19 |
| ENSG00000066117 | SMARCD1  | -1.28E+00 | 1.02E-20 | 1.86E-19 |
| ENSG00000139278 | GLIPR1   | -2.53E+00 | 1.16E-20 | 2.11E-19 |
| ENSG00000111845 | PAK1IP1  | -1.61E+00 | 1.17E-20 | 2.12E-19 |
| ENSG00000150347 | ARID5B   | -2.09E+00 | 1.29E-20 | 2.35E-19 |

|                 |          |           |          |          |
|-----------------|----------|-----------|----------|----------|
| ENSG00000131370 | SH3BP5   | -2.57E+00 | 1.32E-20 | 2.39E-19 |
| ENSG00000104856 | RELB     | -1.94E+00 | 1.36E-20 | 2.47E-19 |
| ENSG00000178531 | CTXN1    | -1.73E+00 | 1.81E-20 | 3.26E-19 |
| ENSG00000188846 | RPL14    | -1.47E+00 | 1.90E-20 | 3.41E-19 |
| ENSG00000131943 | C19orf12 | -2.80E+00 | 1.96E-20 | 3.52E-19 |
| ENSG00000136244 | IL6      | -4.75E+00 | 2.37E-20 | 4.21E-19 |
| ENSG00000135521 | LTV1     | -1.19E+00 | 2.37E-20 | 4.22E-19 |
| ENSG00000166347 | CYB5A    | -2.36E+00 | 2.46E-20 | 4.37E-19 |
| ENSG00000211455 | STK38L   | -1.25E+00 | 2.71E-20 | 4.79E-19 |
| ENSG00000233913 | RPL10P9  | -2.36E+00 | 2.72E-20 | 4.81E-19 |
| ENSG00000123610 | TNFAIP6  | -5.28E+00 | 2.74E-20 | 4.84E-19 |
| ENSG00000154310 | TNIK     | -2.56E+00 | 3.03E-20 | 5.33E-19 |
| ENSG00000148154 | UGCG     | -1.17E+00 | 3.12E-20 | 5.50E-19 |
| ENSG00000122970 | IFT81    | -1.57E+00 | 3.17E-20 | 5.59E-19 |
| ENSG00000076382 | SPAG5    | -1.30E+00 | 3.63E-20 | 6.36E-19 |
| ENSG00000213186 | TRIM59   | -1.99E+00 | 4.18E-20 | 7.31E-19 |
| ENSG00000140682 | TGFB111  | -1.69E+00 | 4.44E-20 | 7.74E-19 |
| ENSG00000125743 | SNRPD2   | -2.80E+00 | 6.10E-20 | 1.05E-18 |
| ENSG00000183207 | RUVBL2   | -1.35E+00 | 6.62E-20 | 1.14E-18 |
| ENSG00000113048 | MRPS27   | -1.44E+00 | 6.64E-20 | 1.14E-18 |
| ENSG00000100243 | CYB5R3   | -1.65E+00 | 6.70E-20 | 1.15E-18 |
| ENSG00000180616 | SSTR2    | -4.99E+00 | 7.47E-20 | 1.27E-18 |
| ENSG00000099998 | GGT5     | -3.17E+00 | 7.69E-20 | 1.31E-18 |
| ENSG00000138175 | ARL3     | -1.49E+00 | 7.77E-20 | 1.32E-18 |
| ENSG00000160767 | FAM189B  | -1.89E+00 | 7.98E-20 | 1.36E-18 |
| ENSG00000136108 | CKAP2    | -1.37E+00 | 8.71E-20 | 1.48E-18 |
| ENSG00000181104 | F2R      | -1.87E+00 | 8.72E-20 | 1.48E-18 |
| ENSG00000167088 | SNRPD1   | -1.94E+00 | 1.05E-19 | 1.77E-18 |
| ENSG00000135549 | PKIB     | -3.78E+00 | 1.12E-19 | 1.88E-18 |
| ENSG00000100196 | KDELR3   | -2.57E+00 | 1.21E-19 | 2.03E-18 |
| ENSG00000151466 | SCLT1    | -1.67E+00 | 1.28E-19 | 2.14E-18 |
| ENSG00000122873 | CISD1    | -1.40E+00 | 1.38E-19 | 2.30E-18 |
| ENSG00000270885 | RASL10B  | -3.59E+00 | 1.46E-19 | 2.44E-18 |
| ENSG00000101384 | JAG1     | -1.17E+00 | 1.50E-19 | 2.49E-18 |
| ENSG00000123485 | HJURP    | -1.34E+00 | 1.53E-19 | 2.55E-18 |
| ENSG00000164054 | SHISA5   | -1.25E+00 | 1.56E-19 | 2.59E-18 |
| ENSG00000197061 | HIST1H4C | -3.43E+00 | 2.09E-19 | 3.45E-18 |
| ENSG00000108679 | LGALS3BP | -1.48E+00 | 2.14E-19 | 3.52E-18 |
| ENSG00000110108 | TMEM109  | -1.01E+00 | 2.46E-19 | 4.03E-18 |
| ENSG00000112306 | RPS12    | -1.60E+00 | 2.51E-19 | 4.10E-18 |

|                 |          |           |          |          |
|-----------------|----------|-----------|----------|----------|
| ENSG00000112186 | CAP2     | -3.11E+00 | 3.34E-19 | 5.42E-18 |
| ENSG00000114439 | BBX      | -1.48E+00 | 3.41E-19 | 5.54E-18 |
| ENSG00000204628 | RACK1    | -1.60E+00 | 4.93E-19 | 7.94E-18 |
| ENSG00000113719 | ERGIC1   | -1.55E+00 | 5.23E-19 | 8.41E-18 |
| ENSG00000089685 | BIRC5    | -1.61E+00 | 6.73E-19 | 1.07E-17 |
| ENSG00000109674 | NEIL3    | -2.32E+00 | 6.80E-19 | 1.08E-17 |
| ENSG00000173638 | SLC19A1  | -1.77E+00 | 8.24E-19 | 1.31E-17 |
| ENSG00000178999 | AURKB    | -1.85E+00 | 9.37E-19 | 1.48E-17 |
| ENSG00000198015 | MRPL42   | -1.31E+00 | 9.52E-19 | 1.50E-17 |
| ENSG00000088205 | DDX18    | -1.47E+00 | 9.81E-19 | 1.55E-17 |
| ENSG00000080986 | NDC80    | -1.89E+00 | 9.96E-19 | 1.57E-17 |
| ENSG00000113356 | POLR3G   | -1.98E+00 | 1.03E-18 | 1.62E-17 |
| ENSG00000110700 | RPS13    | -1.73E+00 | 1.04E-18 | 1.63E-17 |
| ENSG00000008311 | AASS     | -2.01E+00 | 1.06E-18 | 1.67E-17 |
| ENSG00000138448 | ITGAV    | -1.24E+00 | 1.17E-18 | 1.82E-17 |
| ENSG00000168028 | RPSA     | -1.28E+00 | 1.19E-18 | 1.86E-17 |
| ENSG00000120833 | SOCS2    | -2.24E+00 | 1.32E-18 | 2.06E-17 |
| ENSG00000164176 | EDIL3    | -1.25E+00 | 1.44E-18 | 2.24E-17 |
| ENSG00000073670 | ADAM11   | -4.04E+00 | 1.46E-18 | 2.28E-17 |
| ENSG00000154845 | PPP4R1   | -1.61E+00 | 1.57E-18 | 2.45E-17 |
| ENSG00000135414 | GDF11    | -2.59E+00 | 1.61E-18 | 2.49E-17 |
| ENSG00000119729 | RHOQ     | -1.44E+00 | 1.95E-18 | 3.02E-17 |
| ENSG00000144815 | NXPE3    | -1.52E+00 | 1.97E-18 | 3.03E-17 |
| ENSG00000169679 | BUB1     | -1.33E+00 | 2.03E-18 | 3.13E-17 |
| ENSG00000117592 | PRDX6    | -1.21E+00 | 2.04E-18 | 3.13E-17 |
| ENSG00000155115 | GTF3C6   | -1.26E+00 | 2.05E-18 | 3.16E-17 |
| ENSG00000156471 | PTDSS1   | -1.36E+00 | 2.37E-18 | 3.63E-17 |
| ENSG00000177706 | FAM20C   | -1.16E+00 | 2.50E-18 | 3.81E-17 |
| ENSG00000114686 | MRPL3    | -1.12E+00 | 2.60E-18 | 3.95E-17 |
| ENSG00000162585 | FAAP20   | -2.27E+00 | 2.64E-18 | 4.01E-17 |
| ENSG00000130935 | NOL11    | -1.08E+00 | 2.90E-18 | 4.40E-17 |
| ENSG00000152749 | GPR180   | -1.25E+00 | 3.07E-18 | 4.65E-17 |
| ENSG00000010270 | STARD3NL | -1.86E+00 | 3.16E-18 | 4.77E-17 |
| ENSG00000135451 | TROAP    | -2.00E+00 | 3.23E-18 | 4.88E-17 |
| ENSG00000065923 | SLC9A7   | -2.54E+00 | 3.27E-18 | 4.94E-17 |
| ENSG00000138326 | RPS24    | -1.47E+00 | 3.44E-18 | 5.19E-17 |
| ENSG00000235559 | NOP56P1  | -2.71E+00 | 3.80E-18 | 5.71E-17 |
| ENSG00000143641 | GALNT2   | -1.20E+00 | 3.92E-18 | 5.89E-17 |
| ENSG00000104964 | TLE5     | -1.52E+00 | 4.24E-18 | 6.35E-17 |
| ENSG00000261236 | BOP1     | -1.50E+00 | 4.39E-18 | 6.58E-17 |

|                 |          |           |          |          |
|-----------------|----------|-----------|----------|----------|
| ENSG00000158234 | FAIM     | -1.97E+00 | 4.42E-18 | 6.61E-17 |
| ENSG00000150760 | DOCK1    | -1.52E+00 | 5.15E-18 | 7.67E-17 |
| ENSG00000175387 | SMAD2    | -1.20E+00 | 5.69E-18 | 8.45E-17 |
| ENSG00000117395 | EBNA1BP2 | -1.53E+00 | 5.73E-18 | 8.50E-17 |
| ENSG00000140443 | IGF1R    | -1.87E+00 | 6.32E-18 | 9.36E-17 |
| ENSG00000143947 | RPS27A   | -1.78E+00 | 6.51E-18 | 9.63E-17 |
| ENSG00000164904 | ALDH7A1  | -1.46E+00 | 6.60E-18 | 9.75E-17 |
| ENSG00000142541 | RPL13A   | -1.93E+00 | 6.60E-18 | 9.75E-17 |
| ENSG00000164032 | H2AFZ    | -1.23E+00 | 7.59E-18 | 1.12E-16 |
| ENSG00000183386 | FHL3     | -1.86E+00 | 7.78E-18 | 1.14E-16 |
| ENSG00000090971 | NAT14    | -2.30E+00 | 8.12E-18 | 1.19E-16 |
| ENSG00000164985 | PSIP1    | -1.10E+00 | 8.27E-18 | 1.21E-16 |
| ENSG00000154277 | UCHL1    | -1.24E+00 | 8.61E-18 | 1.25E-16 |
| ENSG00000114391 | RPL24    | -1.45E+00 | 9.32E-18 | 1.35E-16 |
| ENSG00000165304 | MELK     | -1.11E+00 | 1.00E-17 | 1.45E-16 |
| ENSG00000125691 | RPL23    | -1.97E+00 | 1.02E-17 | 1.47E-16 |
| ENSG00000131747 | TOP2A    | -1.62E+00 | 1.12E-17 | 1.61E-16 |
| ENSG00000020256 | ZFP64    | -1.23E+00 | 1.41E-17 | 2.01E-16 |
| ENSG00000111144 | LTA4H    | -1.47E+00 | 1.54E-17 | 2.20E-16 |
| ENSG00000108561 | C1QBP    | -1.39E+00 | 1.60E-17 | 2.29E-16 |
| ENSG00000125841 | NRSN2    | -1.41E+00 | 1.61E-17 | 2.29E-16 |
| ENSG00000184277 | TM2D3    | -1.85E+00 | 1.71E-17 | 2.43E-16 |
| ENSG00000142089 | IFITM3   | -1.27E+00 | 1.77E-17 | 2.51E-16 |
| ENSG00000230629 | RPS23P8  | -1.78E+00 | 1.78E-17 | 2.52E-16 |
| ENSG00000254726 | MEX3A    | -1.55E+00 | 1.89E-17 | 2.67E-16 |
| ENSG00000101444 | AHCY     | -1.43E+00 | 2.20E-17 | 3.10E-16 |
| ENSG00000109881 | CCDC34   | -1.02E+00 | 2.69E-17 | 3.75E-16 |
| ENSG00000108559 | NUP88    | -1.04E+00 | 2.88E-17 | 4.01E-16 |
| ENSG00000176619 | LMNB2    | -1.01E+00 | 2.92E-17 | 4.06E-16 |
| ENSG00000130024 | PHF10    | -1.19E+00 | 3.37E-17 | 4.67E-16 |
| ENSG00000137547 | MRPL15   | -1.66E+00 | 3.56E-17 | 4.93E-16 |
| ENSG00000149541 | B3GAT3   | -1.96E+00 | 4.05E-17 | 5.57E-16 |
| ENSG00000116337 | AMPD2    | -2.09E+00 | 4.23E-17 | 5.82E-16 |
| ENSG00000075218 | GTSE1    | -1.21E+00 | 4.91E-17 | 6.74E-16 |
| ENSG00000085491 | SLC25A24 | -1.02E+00 | 5.02E-17 | 6.87E-16 |
| ENSG00000134138 | MEIS2    | -1.22E+00 | 6.89E-17 | 9.35E-16 |
| ENSG00000147419 | CCDC25   | -1.07E+00 | 6.98E-17 | 9.47E-16 |
| ENSG00000111786 | SRSF9    | -1.07E+00 | 7.09E-17 | 9.59E-16 |
| ENSG00000079819 | EPB41L2  | -1.67E+00 | 7.11E-17 | 9.62E-16 |
| ENSG00000172986 | GXYLT2   | -3.00E+00 | 7.11E-17 | 9.62E-16 |

|                 |           |           |          |          |
|-----------------|-----------|-----------|----------|----------|
| ENSG00000081154 | PCNP      | -1.07E+00 | 7.94E-17 | 1.07E-15 |
| ENSG00000092621 | PHGDH     | -1.13E+00 | 9.57E-17 | 1.28E-15 |
| ENSG00000104320 | NBN       | -1.30E+00 | 1.04E-16 | 1.38E-15 |
| ENSG00000097033 | SH3GLB1   | -1.48E+00 | 1.06E-16 | 1.41E-15 |
| ENSG00000158290 | CUL4B     | -1.09E+00 | 1.36E-16 | 1.81E-15 |
| ENSG00000226479 | TMEM185B  | -1.83E+00 | 1.44E-16 | 1.90E-15 |
| ENSG00000103550 | KNOP1     | -1.09E+00 | 1.55E-16 | 2.03E-15 |
| ENSG00000179041 | RRS1      | -2.00E+00 | 1.63E-16 | 2.14E-15 |
| ENSG00000091127 | PUS7      | -2.02E+00 | 1.73E-16 | 2.26E-15 |
| ENSG00000145332 | KLHL8     | -1.95E+00 | 1.80E-16 | 2.36E-15 |
| ENSG00000071794 | HLTF      | -1.50E+00 | 1.85E-16 | 2.42E-15 |
| ENSG00000040275 | SPDL1     | -1.01E+00 | 1.98E-16 | 2.59E-15 |
| ENSG00000144749 | LRIG1     | -1.58E+00 | 2.09E-16 | 2.73E-15 |
| ENSG00000148303 | RPL7A     | -1.27E+00 | 2.57E-16 | 3.34E-15 |
| ENSG00000079616 | KIF22     | -1.01E+00 | 2.58E-16 | 3.35E-15 |
| ENSG00000109861 | CTSC      | -2.20E+00 | 2.84E-16 | 3.68E-15 |
| ENSG00000126749 | EMG1      | -1.72E+00 | 2.85E-16 | 3.69E-15 |
| ENSG00000102967 | DHODH     | -3.07E+00 | 2.89E-16 | 3.74E-15 |
| ENSG00000042062 | RIPOR3    | -5.27E+00 | 2.92E-16 | 3.77E-15 |
| ENSG00000128609 | NDUFA5    | -1.01E+00 | 3.42E-16 | 4.39E-15 |
| ENSG00000075914 | EXOSC7    | -1.02E+00 | 3.44E-16 | 4.42E-15 |
| ENSG00000164114 | MAP9      | -1.42E+00 | 3.76E-16 | 4.82E-15 |
| ENSG00000198417 | MT1F      | -6.68E+00 | 3.99E-16 | 5.11E-15 |
| ENSG00000137807 | KIF23     | -1.22E+00 | 4.35E-16 | 5.55E-15 |
| ENSG00000162377 | COA7      | -1.40E+00 | 4.42E-16 | 5.64E-15 |
| ENSG00000135480 | KRT7      | -3.80E+00 | 4.58E-16 | 5.84E-15 |
| ENSG00000153560 | UBP1      | -1.11E+00 | 4.68E-16 | 5.96E-15 |
| ENSG00000141384 | TAF4B     | -3.79E+00 | 5.24E-16 | 6.65E-15 |
| ENSG00000111817 | DSE       | -1.11E+00 | 5.50E-16 | 6.97E-15 |
| ENSG00000166033 | HTRA1     | -2.72E+00 | 5.90E-16 | 7.48E-15 |
| ENSG00000123416 | TUBA1B    | -1.27E+00 | 5.92E-16 | 7.50E-15 |
| ENSG00000204576 | PRR3      | -2.01E+00 | 5.98E-16 | 7.55E-15 |
| ENSG00000077152 | UBE2T     | -1.33E+00 | 7.07E-16 | 8.90E-15 |
| ENSG00000255737 | AGAP2-AS1 | -3.77E+00 | 7.15E-16 | 9.00E-15 |
| ENSG00000196177 | ACADSB    | -2.79E+00 | 7.97E-16 | 1.00E-14 |
| ENSG00000135070 | ISCA1     | -1.47E+00 | 8.15E-16 | 1.02E-14 |
| ENSG00000119397 | CNTRL     | -1.69E+00 | 8.82E-16 | 1.10E-14 |
| ENSG00000112983 | BRD8      | -1.35E+00 | 9.48E-16 | 1.18E-14 |
| ENSG00000171863 | RPS7      | -1.67E+00 | 9.83E-16 | 1.22E-14 |
| ENSG00000004455 | AK2       | -1.57E+00 | 1.02E-15 | 1.26E-14 |

|                 |          |           |          |          |
|-----------------|----------|-----------|----------|----------|
| ENSG00000073536 | NLE1     | -2.30E+00 | 1.12E-15 | 1.38E-14 |
| ENSG00000198498 | TMA16    | -1.20E+00 | 1.17E-15 | 1.45E-14 |
| ENSG00000173757 | STAT5B   | -1.34E+00 | 1.28E-15 | 1.58E-14 |
| ENSG00000171724 | VAT1L    | -2.32E+00 | 1.38E-15 | 1.69E-14 |
| ENSG00000115365 | LANCL1   | -1.54E+00 | 1.41E-15 | 1.72E-14 |
| ENSG00000142102 | PGGHG    | -4.94E+00 | 1.43E-15 | 1.75E-14 |
| ENSG00000115541 | HSPE1    | -1.93E+00 | 1.56E-15 | 1.90E-14 |
| ENSG00000182979 | MTA1     | -1.98E+00 | 1.60E-15 | 1.94E-14 |
| ENSG00000165821 | SALL2    | -4.07E+00 | 1.83E-15 | 2.23E-14 |
| ENSG00000134198 | TSPAN2   | -3.26E+00 | 1.86E-15 | 2.26E-14 |
| ENSG00000151491 | EPS8     | -1.13E+00 | 1.89E-15 | 2.29E-14 |
| ENSG00000143891 | GALM     | -2.43E+00 | 2.11E-15 | 2.56E-14 |
| ENSG00000113594 | LIFR     | -2.17E+00 | 2.18E-15 | 2.64E-14 |
| ENSG00000035499 | DEPDC1B  | -1.74E+00 | 2.26E-15 | 2.73E-14 |
| ENSG00000187193 | MT1X     | -1.72E+00 | 2.92E-15 | 3.50E-14 |
| ENSG00000169288 | MRPL1    | -1.24E+00 | 2.98E-15 | 3.57E-14 |
| ENSG00000071575 | TRIB2    | -3.34E+00 | 3.00E-15 | 3.59E-14 |
| ENSG00000162694 | EXTL2    | -1.54E+00 | 3.09E-15 | 3.69E-14 |
| ENSG00000148690 | FRA10AC1 | -1.14E+00 | 3.47E-15 | 4.14E-14 |
| ENSG00000142937 | RPS8     | -1.32E+00 | 3.53E-15 | 4.21E-14 |
| ENSG00000166851 | PLK1     | -1.36E+00 | 3.57E-15 | 4.26E-14 |
| ENSG00000122026 | RPL21    | -1.53E+00 | 3.67E-15 | 4.37E-14 |
| ENSG00000112655 | PTK7     | -1.45E+00 | 3.97E-15 | 4.72E-14 |
| ENSG00000164934 | DCAF13   | -1.03E+00 | 3.98E-15 | 4.73E-14 |
| ENSG00000101871 | MID1     | -1.70E+00 | 4.38E-15 | 5.18E-14 |
| ENSG00000163069 | SGCB     | -1.08E+00 | 4.58E-15 | 5.41E-14 |
| ENSG00000065882 | TBC1D1   | -1.30E+00 | 4.66E-15 | 5.50E-14 |
| ENSG00000104613 | INTS10   | -1.20E+00 | 4.68E-15 | 5.52E-14 |
| ENSG00000120699 | EXOSC8   | -1.13E+00 | 4.92E-15 | 5.78E-14 |
| ENSG00000134874 | DZIP1    | -1.12E+00 | 4.99E-15 | 5.85E-14 |
| ENSG00000117318 | ID3      | -1.24E+00 | 5.06E-15 | 5.94E-14 |
| ENSG00000168002 | POLR2G   | -1.66E+00 | 5.07E-15 | 5.94E-14 |
| ENSG00000183010 | PYCR1    | -2.22E+00 | 5.42E-15 | 6.34E-14 |
| ENSG00000139354 | GAS2L3   | -1.99E+00 | 5.60E-15 | 6.55E-14 |
| ENSG00000089157 | RPLP0    | -1.25E+00 | 5.61E-15 | 6.56E-14 |
| ENSG00000231500 | RPS18    | -1.81E+00 | 5.83E-15 | 6.81E-14 |
| ENSG00000075213 | SEMA3A   | -3.18E+00 | 5.85E-15 | 6.82E-14 |
| ENSG00000226950 | DANCR    | -2.38E+00 | 6.15E-15 | 7.17E-14 |
| ENSG00000169490 | TM2D2    | -1.23E+00 | 6.69E-15 | 7.74E-14 |
| ENSG00000005249 | PRKAR2B  | -2.18E+00 | 6.72E-15 | 7.78E-14 |



|                 |          |           |          |          |
|-----------------|----------|-----------|----------|----------|
| ENSG00000110172 | CHORDC1  | -1.10E+00 | 7.05E-15 | 8.14E-14 |
| ENSG00000198721 | ECI2     | -1.26E+00 | 7.45E-15 | 8.59E-14 |
| ENSG00000124614 | RPS10    | -2.29E+00 | 7.65E-15 | 8.82E-14 |
| ENSG00000249669 | CARMN    | -2.81E+00 | 8.01E-15 | 9.22E-14 |
| ENSG00000137463 | MGARP    | -3.29E+00 | 8.09E-15 | 9.30E-14 |
| ENSG00000112208 | BAG2     | -1.58E+00 | 8.65E-15 | 9.91E-14 |
| ENSG00000108861 | DUSP3    | -1.38E+00 | 8.68E-15 | 9.94E-14 |
| ENSG00000112742 | TTK      | -1.28E+00 | 9.22E-15 | 1.05E-13 |
| ENSG00000159228 | CBR1     | -1.58E+00 | 1.07E-14 | 1.22E-13 |
| ENSG00000139263 | LRIG3    | -2.24E+00 | 1.10E-14 | 1.26E-13 |
| ENSG00000109475 | RPL34    | -2.39E+00 | 1.14E-14 | 1.30E-13 |
| ENSG00000139343 | SNRPF    | -1.72E+00 | 1.18E-14 | 1.34E-13 |
| ENSG00000105854 | PON2     | -1.03E+00 | 1.19E-14 | 1.35E-13 |
| ENSG00000103494 | RPGRIP1L | -1.66E+00 | 1.32E-14 | 1.49E-13 |
| ENSG00000067992 | PDK3     | -2.08E+00 | 1.36E-14 | 1.53E-13 |
| ENSG00000171453 | POLR1C   | -1.06E+00 | 1.39E-14 | 1.56E-13 |
| ENSG00000146232 | NFKBIE   | -2.28E+00 | 1.40E-14 | 1.57E-13 |
| ENSG00000018510 | AGPS     | -1.23E+00 | 1.46E-14 | 1.63E-13 |
| ENSG00000203666 | EFCAB2   | -1.75E+00 | 1.60E-14 | 1.78E-13 |
| ENSG00000100105 | PATZ1    | -2.18E+00 | 1.64E-14 | 1.83E-13 |
| ENSG00000137285 | TUBB2B   | -1.75E+00 | 1.64E-14 | 1.83E-13 |
| ENSG00000134686 | PHC2     | -1.08E+00 | 1.65E-14 | 1.83E-13 |
| ENSG00000102144 | PGK1     | -1.12E+00 | 1.70E-14 | 1.89E-13 |
| ENSG00000154917 | RAB6B    | -2.06E+00 | 1.74E-14 | 1.92E-13 |
| ENSG00000167272 | POP5     | -2.33E+00 | 1.74E-14 | 1.92E-13 |
| ENSG00000146072 | TNFRSF21 | -1.65E+00 | 1.84E-14 | 2.03E-13 |
| ENSG00000187514 | PTMA     | -1.28E+00 | 1.84E-14 | 2.04E-13 |
| ENSG00000134775 | FHOD3    | -6.47E+00 | 2.14E-14 | 2.35E-13 |
| ENSG00000184357 | HIST1H1B | -2.81E+00 | 2.20E-14 | 2.42E-13 |
| ENSG00000073060 | SCARB1   | -1.35E+00 | 2.25E-14 | 2.47E-13 |
| ENSG00000100625 | SIX4     | -2.11E+00 | 2.46E-14 | 2.69E-13 |
| ENSG00000198242 | RPL23A   | -1.39E+00 | 2.52E-14 | 2.75E-13 |
| ENSG00000133706 | LARS     | -1.50E+00 | 2.52E-14 | 2.76E-13 |
| ENSG00000156103 | MMP16    | -2.17E+00 | 2.70E-14 | 2.94E-13 |
| ENSG00000136319 | TTC5     | -1.94E+00 | 2.73E-14 | 2.97E-13 |
| ENSG00000167721 | TSR1     | -1.10E+00 | 2.93E-14 | 3.18E-13 |
| ENSG00000164587 | RPS14    | -1.67E+00 | 2.95E-14 | 3.20E-13 |
| ENSG00000169715 | MT1E     | -2.43E+00 | 2.98E-14 | 3.23E-13 |
| ENSG00000213390 | ARHGAP19 | -2.42E+00 | 3.00E-14 | 3.25E-13 |
| ENSG00000173085 | COQ2     | -1.43E+00 | 3.53E-14 | 3.80E-13 |

|                 |          |           |          |          |
|-----------------|----------|-----------|----------|----------|
| ENSG00000065183 | WDR3     | -1.86E+00 | 3.53E-14 | 3.80E-13 |
| ENSG00000170425 | ADORA2B  | -1.38E+00 | 3.93E-14 | 4.22E-13 |
| ENSG00000105810 | CDK6     | -1.40E+00 | 4.02E-14 | 4.31E-13 |
| ENSG00000167291 | TBC1D16  | -2.38E+00 | 4.11E-14 | 4.41E-13 |
| ENSG00000138587 | MNS1     | -1.63E+00 | 4.26E-14 | 4.55E-13 |
| ENSG00000100632 | ERH      | -1.12E+00 | 4.34E-14 | 4.64E-13 |
| ENSG00000175063 | UBE2C    | -1.03E+00 | 4.46E-14 | 4.76E-13 |
| ENSG00000147130 | ZMYM3    | -1.84E+00 | 4.51E-14 | 4.81E-13 |
| ENSG00000179241 | LDLRAD3  | -3.47E+00 | 4.74E-14 | 5.05E-13 |
| ENSG00000198353 | HOXC4    | -1.79E+00 | 4.92E-14 | 5.23E-13 |
| ENSG00000120738 | EGR1     | -2.71E+00 | 5.53E-14 | 5.85E-13 |
| ENSG00000160446 | ZDHH12   | -2.52E+00 | 5.79E-14 | 6.12E-13 |
| ENSG00000165819 | METTL3   | -1.45E+00 | 6.19E-14 | 6.53E-13 |
| ENSG00000160124 | CCDC58   | -1.29E+00 | 6.53E-14 | 6.86E-13 |
| ENSG00000005175 | RPAP3    | -1.20E+00 | 6.60E-14 | 6.93E-13 |
| ENSG00000142168 | SOD1     | -1.24E+00 | 6.74E-14 | 7.07E-13 |
| ENSG00000171497 | PPID     | -1.17E+00 | 7.54E-14 | 7.90E-13 |
| ENSG00000173068 | BNC2     | -2.17E+00 | 7.79E-14 | 8.15E-13 |
| ENSG00000120318 | ARAP3    | -2.48E+00 | 7.85E-14 | 8.22E-13 |
| ENSG00000137809 | ITGA11   | -2.66E+00 | 7.97E-14 | 8.33E-13 |
| ENSG00000111639 | MRPL51   | -1.20E+00 | 8.03E-14 | 8.38E-13 |
| ENSG00000164116 | GUCY1A1  | -5.29E+00 | 8.48E-14 | 8.85E-13 |
| ENSG00000148843 | PDCD11   | -1.28E+00 | 9.08E-14 | 9.46E-13 |
| ENSG00000107672 | NSMCE4A  | -1.43E+00 | 9.39E-14 | 9.78E-13 |
| ENSG00000117724 | CENPF    | -1.44E+00 | 1.13E-13 | 1.17E-12 |
| ENSG00000152147 | GEMIN6   | -1.81E+00 | 1.13E-13 | 1.17E-12 |
| ENSG00000118985 | ELL2     | -1.40E+00 | 1.13E-13 | 1.17E-12 |
| ENSG00000159055 | MIS18A   | -1.15E+00 | 1.14E-13 | 1.17E-12 |
| ENSG00000143771 | CNIH4    | -1.75E+00 | 1.16E-13 | 1.19E-12 |
| ENSG00000100823 | APEX1    | -1.17E+00 | 1.27E-13 | 1.30E-12 |
| ENSG00000092140 | G2E3     | -1.56E+00 | 1.33E-13 | 1.37E-12 |
| ENSG00000070785 | EIF2B3   | -1.25E+00 | 1.38E-13 | 1.42E-12 |
| ENSG00000156110 | ADK      | -1.09E+00 | 1.40E-13 | 1.44E-12 |
| ENSG00000101220 | C20orf27 | -1.34E+00 | 1.44E-13 | 1.47E-12 |
| ENSG00000160131 | VMA21    | -1.50E+00 | 1.66E-13 | 1.69E-12 |
| ENSG00000162645 | GBP2     | -3.68E+00 | 1.67E-13 | 1.70E-12 |
| ENSG00000110841 | PPFIBP1  | -1.05E+00 | 1.71E-13 | 1.74E-12 |
| ENSG00000130176 | CNN1     | -1.80E+00 | 1.74E-13 | 1.77E-12 |
| ENSG00000083807 | SLC27A5  | -4.08E+00 | 1.80E-13 | 1.83E-12 |
| ENSG00000278540 | ACACA    | -1.54E+00 | 1.85E-13 | 1.87E-12 |

|                 |            |           |          |          |
|-----------------|------------|-----------|----------|----------|
| ENSG00000197043 | ANXA6      | -1.39E+00 | 1.93E-13 | 1.95E-12 |
| ENSG00000198189 | HSD17B11   | -2.58E+00 | 2.19E-13 | 2.21E-12 |
| ENSG00000049249 | TNFRSF9    | -2.35E+00 | 2.31E-13 | 2.32E-12 |
| ENSG00000168298 | HIST1H1E   | -2.54E+00 | 2.33E-13 | 2.34E-12 |
| ENSG00000158882 | TOMM40L    | -1.86E+00 | 2.37E-13 | 2.38E-12 |
| ENSG00000186687 | LYRM7      | -2.33E+00 | 2.41E-13 | 2.42E-12 |
| ENSG00000104231 | ZFAND1     | -1.96E+00 | 2.60E-13 | 2.60E-12 |
| ENSG00000221869 | CEBPD      | -1.89E+00 | 3.12E-13 | 3.09E-12 |
| ENSG00000155903 | RASA2      | -2.12E+00 | 3.52E-13 | 3.48E-12 |
| ENSG00000060688 | SNRNP40    | -1.32E+00 | 3.96E-13 | 3.90E-12 |
| ENSG00000101751 | POLI       | -3.97E+00 | 4.56E-13 | 4.48E-12 |
| ENSG00000137692 | DCUN1D5    | -1.38E+00 | 4.69E-13 | 4.60E-12 |
| ENSG00000104518 | GSDMD      | -1.66E+00 | 4.96E-13 | 4.85E-12 |
| ENSG00000134954 | ETS1       | -1.22E+00 | 5.04E-13 | 4.92E-12 |
| ENSG00000196683 | TOMM7      | -1.92E+00 | 5.61E-13 | 5.47E-12 |
| ENSG00000153140 | CETN3      | -1.58E+00 | 5.66E-13 | 5.51E-12 |
| ENSG00000147408 | CSGALNACT1 | -1.93E+00 | 5.71E-13 | 5.56E-12 |
| ENSG00000187257 | RSBN1L     | -1.14E+00 | 6.54E-13 | 6.34E-12 |
| ENSG00000025770 | NCAPH2     | -1.22E+00 | 6.60E-13 | 6.39E-12 |
| ENSG00000131469 | RPL27      | -2.04E+00 | 7.08E-13 | 6.85E-12 |
| ENSG00000169439 | SDC2       | -1.21E+00 | 7.78E-13 | 7.50E-12 |
| ENSG00000257698 | GIHCG      | -2.40E+00 | 7.84E-13 | 7.54E-12 |
| ENSG00000253414 | AC124067.2 | -3.67E+00 | 7.86E-13 | 7.56E-12 |
| ENSG00000177732 | SOX12      | -1.20E+00 | 8.46E-13 | 8.11E-12 |
| ENSG00000153071 | DAB2       | -1.82E+00 | 8.58E-13 | 8.21E-12 |
| ENSG00000141934 | PLPP2      | -1.83E+00 | 8.97E-13 | 8.58E-12 |
| ENSG00000118707 | TGIF2      | -1.46E+00 | 9.00E-13 | 8.60E-12 |
| ENSG00000091732 | ZC3HC1     | -1.33E+00 | 9.15E-13 | 8.74E-12 |
| ENSG00000144354 | CDCA7      | -1.65E+00 | 1.03E-12 | 9.78E-12 |
| ENSG00000105186 | ANKRD27    | -1.61E+00 | 1.05E-12 | 9.96E-12 |
| ENSG00000102038 | SMARCA1    | -1.23E+00 | 1.12E-12 | 1.06E-11 |
| ENSG00000184661 | CDCA2      | -1.07E+00 | 1.13E-12 | 1.07E-11 |
| ENSG00000166788 | SAAL1      | -1.20E+00 | 1.14E-12 | 1.08E-11 |
| ENSG00000115525 | ST3GAL5    | -2.53E+00 | 1.18E-12 | 1.12E-11 |
| ENSG00000151465 | CDC123     | -1.15E+00 | 1.18E-12 | 1.12E-11 |
| ENSG00000066279 | ASPM       | -1.29E+00 | 1.20E-12 | 1.13E-11 |
| ENSG00000136522 | MRPL47     | -1.22E+00 | 1.23E-12 | 1.16E-11 |
| ENSG00000205084 | TMEM231    | -2.02E+00 | 1.27E-12 | 1.19E-11 |
| ENSG00000106546 | AHR        | -1.21E+00 | 1.34E-12 | 1.26E-11 |
| ENSG00000105011 | ASF1B      | -1.05E+00 | 1.39E-12 | 1.31E-11 |

|                 |            |           |          |          |
|-----------------|------------|-----------|----------|----------|
| ENSG00000244398 | AC116533.1 | -1.75E+00 | 1.40E-12 | 1.32E-11 |
| ENSG00000106028 | SSBP1      | -1.18E+00 | 1.44E-12 | 1.35E-11 |
| ENSG00000197756 | RPL37A     | -1.65E+00 | 1.48E-12 | 1.39E-11 |
| ENSG00000188010 | MORN2      | -1.93E+00 | 1.50E-12 | 1.41E-11 |
| ENSG00000135686 | KLHL36     | -1.69E+00 | 1.54E-12 | 1.44E-11 |
| ENSG00000118965 | WDR35      | -2.40E+00 | 1.58E-12 | 1.48E-11 |
| ENSG00000171055 | FEZ2       | -1.40E+00 | 1.64E-12 | 1.53E-11 |
| ENSG00000165506 | DNAAF2     | -1.83E+00 | 1.74E-12 | 1.62E-11 |
| ENSG00000083720 | OXCT1      | -1.26E+00 | 1.80E-12 | 1.67E-11 |
| ENSG00000186314 | PRELID2    | -2.65E+00 | 1.94E-12 | 1.79E-11 |
| ENSG00000115163 | CENPA      | -1.43E+00 | 1.95E-12 | 1.80E-11 |
| ENSG00000090447 | TFAP4      | -2.74E+00 | 2.00E-12 | 1.85E-11 |
| ENSG00000112175 | BMP5       | -6.04E+00 | 2.03E-12 | 1.88E-11 |
| ENSG00000156398 | SFXN2      | -3.67E+00 | 2.03E-12 | 1.88E-11 |
| ENSG00000164611 | PTTG1      | -1.57E+00 | 2.06E-12 | 1.90E-11 |
| ENSG00000245648 | AC022075.1 | -2.33E+00 | 2.06E-12 | 1.90E-11 |
| ENSG00000241837 | ATP5PO     | -1.16E+00 | 2.21E-12 | 2.03E-11 |
| ENSG00000171262 | FAM98B     | -1.30E+00 | 2.26E-12 | 2.07E-11 |
| ENSG00000178776 | C5orf46    | -3.62E+00 | 2.41E-12 | 2.21E-11 |
| ENSG00000261327 | AC134312.5 | -2.31E+00 | 2.45E-12 | 2.24E-11 |
| ENSG00000143363 | PRUNE1     | -2.38E+00 | 2.46E-12 | 2.25E-11 |
| ENSG00000166250 | CLMP       | -1.36E+00 | 2.54E-12 | 2.32E-11 |
| ENSG00000162384 | CZIB       | -1.42E+00 | 2.59E-12 | 2.36E-11 |
| ENSG00000121864 | ZNF639     | -1.46E+00 | 2.74E-12 | 2.49E-11 |
| ENSG00000162433 | AK4        | -1.44E+00 | 2.76E-12 | 2.51E-11 |
| ENSG00000184374 | COLEC10    | -3.11E+00 | 2.79E-12 | 2.53E-11 |
| ENSG00000162496 | DHRS3      | -1.40E+00 | 3.07E-12 | 2.78E-11 |
| ENSG00000133243 | BTBD2      | -1.39E+00 | 3.16E-12 | 2.86E-11 |
| ENSG00000122862 | SRGN       | -1.80E+00 | 3.18E-12 | 2.88E-11 |
| ENSG00000140534 | TICRR      | -1.44E+00 | 3.25E-12 | 2.93E-11 |
| ENSG00000111328 | CDK2AP1    | -1.27E+00 | 3.27E-12 | 2.95E-11 |
| ENSG00000176697 | BDNF       | -1.82E+00 | 3.29E-12 | 2.97E-11 |
| ENSG00000182179 | UBA7       | -3.37E+00 | 3.49E-12 | 3.14E-11 |
| ENSG00000111358 | GTF2H3     | -1.34E+00 | 3.52E-12 | 3.16E-11 |
| ENSG00000278619 | MRM1       | -2.36E+00 | 3.56E-12 | 3.20E-11 |
| ENSG00000011426 | ANLN       | -1.01E+00 | 3.67E-12 | 3.29E-11 |
| ENSG00000011295 | TTC19      | -1.19E+00 | 3.77E-12 | 3.38E-11 |
| ENSG00000130810 | PPAN       | -2.00E+00 | 3.79E-12 | 3.39E-11 |
| ENSG00000197594 | ENPP1      | -2.45E+00 | 3.94E-12 | 3.52E-11 |
| ENSG00000056558 | TRAF1      | -2.78E+00 | 4.10E-12 | 3.66E-11 |

|                 |          |           |          |          |
|-----------------|----------|-----------|----------|----------|
| ENSG00000155229 | MMS19    | -1.00E+00 | 4.29E-12 | 3.81E-11 |
| ENSG00000111832 | RWDD1    | -1.02E+00 | 4.41E-12 | 3.92E-11 |
| ENSG00000177830 | CHID1    | -1.16E+00 | 4.64E-12 | 4.12E-11 |
| ENSG00000116157 | GPX7     | -3.07E+00 | 4.75E-12 | 4.21E-11 |
| ENSG00000184924 | PTRHD1   | -1.93E+00 | 5.10E-12 | 4.51E-11 |
| ENSG00000048991 | R3HDM1   | -1.42E+00 | 5.19E-12 | 4.58E-11 |
| ENSG00000123143 | PKN1     | -1.08E+00 | 5.20E-12 | 4.59E-11 |
| ENSG00000163607 | GTPBP8   | -1.14E+00 | 5.35E-12 | 4.72E-11 |
| ENSG00000198794 | SCAMP5   | -1.37E+00 | 5.36E-12 | 4.72E-11 |
| ENSG00000140694 | PARN     | -1.08E+00 | 5.50E-12 | 4.84E-11 |
| ENSG00000071082 | RPL31    | -1.59E+00 | 5.69E-12 | 5.00E-11 |
| ENSG00000107159 | CA9      | -4.06E+00 | 5.72E-12 | 5.03E-11 |
| ENSG00000133169 | BEX1     | -2.05E+00 | 5.76E-12 | 5.06E-11 |
| ENSG00000138442 | WDR12    | -1.34E+00 | 5.89E-12 | 5.17E-11 |
| ENSG00000059573 | ALDH18A1 | -1.27E+00 | 5.92E-12 | 5.20E-11 |
| ENSG00000269190 | FBXO17   | -1.69E+00 | 6.04E-12 | 5.29E-11 |
| ENSG00000138182 | KIF20B   | -1.00E+00 | 6.33E-12 | 5.53E-11 |
| ENSG00000157657 | ZNF618   | -1.77E+00 | 6.67E-12 | 5.82E-11 |
| ENSG00000143067 | ZNF697   | -2.03E+00 | 7.47E-12 | 6.48E-11 |
| ENSG00000005302 | MSL3     | -1.29E+00 | 7.56E-12 | 6.56E-11 |
| ENSG00000131844 | MCCC2    | -1.39E+00 | 8.05E-12 | 6.95E-11 |
| ENSG00000086475 | SEPHS1   | -1.11E+00 | 8.06E-12 | 6.96E-11 |
| ENSG00000143499 | SMYD2    | -2.63E+00 | 8.40E-12 | 7.24E-11 |
| ENSG00000136997 | MYC      | -1.43E+00 | 8.50E-12 | 7.32E-11 |
| ENSG00000116001 | TIA1     | -1.37E+00 | 9.22E-12 | 7.91E-11 |
| ENSG00000180694 | TMEM64   | -1.52E+00 | 9.25E-12 | 7.94E-11 |
| ENSG00000169554 | ZEB2     | -1.81E+00 | 9.36E-12 | 8.02E-11 |
| ENSG00000145623 | OSMR     | -1.60E+00 | 1.02E-11 | 8.71E-11 |
| ENSG00000165030 | NFIL3    | -1.77E+00 | 1.02E-11 | 8.71E-11 |
| ENSG00000126249 | PDCD2L   | -2.11E+00 | 1.03E-11 | 8.77E-11 |
| ENSG00000155393 | HEATR3   | -1.29E+00 | 1.09E-11 | 9.26E-11 |
| ENSG00000068097 | HEATR6   | -1.50E+00 | 1.11E-11 | 9.50E-11 |
| ENSG00000104447 | TRPS1    | -1.83E+00 | 1.17E-11 | 9.92E-11 |
| ENSG00000008324 | SS18L2   | -1.37E+00 | 1.18E-11 | 1.01E-10 |
| ENSG00000105677 | TMEM147  | -1.40E+00 | 1.20E-11 | 1.02E-10 |
| ENSG00000118564 | FBXL5    | -1.54E+00 | 1.23E-11 | 1.05E-10 |
| ENSG00000182004 | SNRPE    | -1.75E+00 | 1.30E-11 | 1.10E-10 |
| ENSG00000117877 | CD3EAP   | -1.18E+00 | 1.31E-11 | 1.11E-10 |
| ENSG00000114107 | CEP70    | -1.20E+00 | 1.42E-11 | 1.20E-10 |
| ENSG00000184992 | BRI3BP   | -1.03E+00 | 1.50E-11 | 1.26E-10 |

|                 |          |           |          |          |
|-----------------|----------|-----------|----------|----------|
| ENSG00000143507 | DUSP10   | -2.40E+00 | 1.55E-11 | 1.31E-10 |
| ENSG00000111247 | RAD51AP1 | -1.04E+00 | 1.57E-11 | 1.32E-10 |
| ENSG00000071655 | MBD3     | -1.04E+00 | 1.59E-11 | 1.34E-10 |
| ENSG00000137337 | MDC1     | -1.32E+00 | 1.70E-11 | 1.43E-10 |
| ENSG00000114054 | PCCB     | -1.12E+00 | 1.77E-11 | 1.48E-10 |
| ENSG00000196968 | FUT11    | -1.33E+00 | 1.86E-11 | 1.56E-10 |
| ENSG00000149150 | SLC43A1  | -2.98E+00 | 1.86E-11 | 1.56E-10 |
| ENSG00000105926 | MPP6     | -1.34E+00 | 1.87E-11 | 1.56E-10 |
| ENSG00000093010 | COMT     | -1.29E+00 | 1.94E-11 | 1.62E-10 |
| ENSG00000107798 | LIPA     | -1.30E+00 | 1.98E-11 | 1.65E-10 |
| ENSG00000104472 | CHRAC1   | -1.08E+00 | 1.99E-11 | 1.65E-10 |
| ENSG00000115364 | MRPL19   | -1.01E+00 | 2.01E-11 | 1.67E-10 |
| ENSG00000149089 | APIP     | -1.56E+00 | 2.06E-11 | 1.71E-10 |
| ENSG00000154122 | ANKH     | -1.13E+00 | 2.09E-11 | 1.73E-10 |
| ENSG00000167118 | URM1     | -1.69E+00 | 2.09E-11 | 1.74E-10 |
| ENSG00000170264 | FAM161A  | -1.56E+00 | 2.16E-11 | 1.79E-10 |
| ENSG00000132846 | ZBED3    | -3.49E+00 | 2.26E-11 | 1.87E-10 |
| ENSG00000111196 | MAGOHB   | -1.20E+00 | 2.28E-11 | 1.89E-10 |
| ENSG00000125821 | DTD1     | -1.56E+00 | 2.33E-11 | 1.92E-10 |
| ENSG00000139637 | C12orf10 | -1.72E+00 | 2.35E-11 | 1.94E-10 |
| ENSG00000135124 | P2RX4    | -2.80E+00 | 2.63E-11 | 2.16E-10 |
| ENSG00000143179 | UCK2     | -1.27E+00 | 2.73E-11 | 2.24E-10 |
| ENSG00000139083 | ETV6     | -1.34E+00 | 2.99E-11 | 2.45E-10 |
| ENSG00000026950 | BTN3A1   | -2.23E+00 | 3.00E-11 | 2.45E-10 |
| ENSG00000153714 | LURAP1L  | -2.10E+00 | 3.03E-11 | 2.48E-10 |
| ENSG00000113360 | DROSHA   | -1.35E+00 | 3.12E-11 | 2.54E-10 |
| ENSG00000072571 | HMMR     | -1.28E+00 | 3.13E-11 | 2.55E-10 |
| ENSG00000120837 | NFYB     | -1.08E+00 | 3.16E-11 | 2.57E-10 |
| ENSG00000138698 | RAP1GDS1 | -1.86E+00 | 3.32E-11 | 2.70E-10 |
| ENSG00000116793 | PHTF1    | -1.21E+00 | 3.33E-11 | 2.70E-10 |
| ENSG00000065989 | PDE4A    | -1.79E+00 | 3.35E-11 | 2.72E-10 |
| ENSG00000148288 | GBGT1    | -4.89E+00 | 3.55E-11 | 2.88E-10 |
| ENSG00000135111 | TBX3     | -1.18E+00 | 3.59E-11 | 2.91E-10 |
| ENSG00000175183 | CSRP2    | -1.59E+00 | 3.71E-11 | 3.00E-10 |
| ENSG00000181924 | COA4     | -1.79E+00 | 3.81E-11 | 3.08E-10 |
| ENSG00000185630 | PBX1     | -1.76E+00 | 3.97E-11 | 3.21E-10 |
| ENSG00000137168 | PPIL1    | -1.01E+00 | 4.02E-11 | 3.25E-10 |
| ENSG00000106638 | TBL2     | -1.25E+00 | 4.10E-11 | 3.31E-10 |
| ENSG00000182010 | RTKN2    | -2.00E+00 | 4.36E-11 | 3.51E-10 |
| ENSG00000164167 | LSM6     | -1.36E+00 | 4.50E-11 | 3.62E-10 |

|                 |           |           |          |          |
|-----------------|-----------|-----------|----------|----------|
| ENSG00000027847 | B4GALT7   | -1.52E+00 | 4.55E-11 | 3.65E-10 |
| ENSG00000185917 | SETD4     | -1.81E+00 | 4.59E-11 | 3.68E-10 |
| ENSG00000143390 | RFX5      | -1.59E+00 | 4.60E-11 | 3.69E-10 |
| ENSG00000091483 | FH        | -1.07E+00 | 4.70E-11 | 3.76E-10 |
| ENSG00000008283 | CYB561    | -1.57E+00 | 4.78E-11 | 3.82E-10 |
| ENSG00000123213 | NLN       | -2.38E+00 | 4.78E-11 | 3.82E-10 |
| ENSG00000140006 | WDR89     | -1.40E+00 | 4.86E-11 | 3.88E-10 |
| ENSG00000005448 | WDR54     | -1.30E+00 | 5.00E-11 | 3.99E-10 |
| ENSG00000118193 | KIF14     | -1.24E+00 | 5.11E-11 | 4.08E-10 |
| ENSG00000129347 | KRI1      | -1.03E+00 | 5.87E-11 | 4.66E-10 |
| ENSG00000145592 | RPL37     | -1.95E+00 | 5.99E-11 | 4.75E-10 |
| ENSG00000108406 | DHX40     | -1.19E+00 | 6.08E-11 | 4.82E-10 |
| ENSG00000163818 | LZTFL1    | -1.50E+00 | 6.09E-11 | 4.82E-10 |
| ENSG00000135372 | NAT10     | -1.16E+00 | 6.12E-11 | 4.85E-10 |
| ENSG00000185745 | IFIT1     | -3.90E+00 | 6.14E-11 | 4.86E-10 |
| ENSG00000169019 | COMMD8    | -1.40E+00 | 6.21E-11 | 4.91E-10 |
| ENSG00000101160 | CTSZ      | -2.58E+00 | 6.25E-11 | 4.94E-10 |
| ENSG00000106366 | SERPINE1  | -1.36E+00 | 6.34E-11 | 5.00E-10 |
| ENSG00000162458 | FBLIM1    | -1.25E+00 | 6.41E-11 | 5.05E-10 |
| ENSG00000105792 | CFAP69    | -4.75E+00 | 6.85E-11 | 5.37E-10 |
| ENSG00000179431 | FJX1      | -2.97E+00 | 7.01E-11 | 5.50E-10 |
| ENSG00000130713 | EXOSC2    | -1.33E+00 | 7.31E-11 | 5.72E-10 |
| ENSG00000121621 | KIF18A    | -1.34E+00 | 7.48E-11 | 5.84E-10 |
| ENSG00000186469 | GNG2      | -4.04E+00 | 7.93E-11 | 6.18E-10 |
| ENSG00000163584 | RPL22L1   | -2.40E+00 | 8.50E-11 | 6.60E-10 |
| ENSG00000136425 | CIB2      | -1.69E+00 | 8.64E-11 | 6.71E-10 |
| ENSG00000077684 | JADE1     | -1.28E+00 | 9.03E-11 | 7.00E-10 |
| ENSG00000101811 | CSTF2     | -1.27E+00 | 9.07E-11 | 7.03E-10 |
| ENSG00000126790 | L3HYPDH   | -1.85E+00 | 9.50E-11 | 7.35E-10 |
| ENSG00000171204 | TMEM126B  | -1.28E+00 | 9.63E-11 | 7.45E-10 |
| ENSG00000225439 | BOLA3-AS1 | -3.25E+00 | 9.95E-11 | 7.69E-10 |
| ENSG00000166441 | RPL27A    | -1.78E+00 | 1.01E-10 | 7.78E-10 |
| ENSG00000118894 | EEF2KMT   | -2.61E+00 | 1.08E-10 | 8.36E-10 |
| ENSG00000144061 | NPHP1     | -2.19E+00 | 1.12E-10 | 8.58E-10 |
| ENSG00000174099 | MSRB3     | -1.17E+00 | 1.12E-10 | 8.58E-10 |
| ENSG00000086189 | DIMT1     | -1.55E+00 | 1.12E-10 | 8.59E-10 |
| ENSG00000187240 | DYNC2H1   | -1.68E+00 | 1.13E-10 | 8.69E-10 |
| ENSG00000283498 | MIR1244-2 | -2.83E+00 | 1.16E-10 | 8.92E-10 |
| ENSG00000240065 | PSMB9     | -1.89E+00 | 1.17E-10 | 8.92E-10 |
| ENSG00000119705 | SLIRP     | -2.08E+00 | 1.24E-10 | 9.46E-10 |

|                 |            |           |          |          |
|-----------------|------------|-----------|----------|----------|
| ENSG00000259807 | AC009093.1 | -3.50E+00 | 1.26E-10 | 9.63E-10 |
| ENSG00000113966 | ARL6       | -1.96E+00 | 1.28E-10 | 9.77E-10 |
| ENSG00000114739 | ACVR2B     | -2.46E+00 | 1.31E-10 | 9.95E-10 |
| ENSG00000242259 | C22orf39   | -1.45E+00 | 1.31E-10 | 9.98E-10 |
| ENSG00000133935 | ERG28      | -1.45E+00 | 1.32E-10 | 1.01E-09 |
| ENSG00000131788 | PIAS3      | -1.57E+00 | 1.33E-10 | 1.01E-09 |
| ENSG0000024526  | DEPDC1     | -1.29E+00 | 1.34E-10 | 1.02E-09 |
| ENSG00000127920 | GNG11      | -3.10E+00 | 1.36E-10 | 1.03E-09 |
| ENSG0000010803  | SCMH1      | -2.01E+00 | 1.36E-10 | 1.03E-09 |
| ENSG00000257093 | DENND11    | -3.14E+00 | 1.39E-10 | 1.05E-09 |
| ENSG00000079150 | FKBP7      | -3.27E+00 | 1.45E-10 | 1.10E-09 |
| ENSG00000142731 | PLK4       | -1.34E+00 | 1.48E-10 | 1.12E-09 |
| ENSG00000137745 | MMP13      | -2.00E+00 | 1.48E-10 | 1.12E-09 |
| ENSG00000162244 | RPL29      | -1.76E+00 | 1.48E-10 | 1.12E-09 |
| ENSG00000174748 | RPL15      | -1.57E+00 | 1.50E-10 | 1.13E-09 |
| ENSG00000116857 | TMEM9      | -1.30E+00 | 1.50E-10 | 1.14E-09 |
| ENSG00000162733 | DDR2       | -1.22E+00 | 1.51E-10 | 1.14E-09 |
| ENSG00000169604 | ANTXR1     | -1.26E+00 | 1.53E-10 | 1.16E-09 |
| ENSG00000241399 | CD302      | -3.55E+00 | 1.68E-10 | 1.27E-09 |
| ENSG00000128656 | CHN1       | -1.76E+00 | 1.73E-10 | 1.30E-09 |
| ENSG00000103319 | EEF2K      | -1.44E+00 | 1.82E-10 | 1.36E-09 |
| ENSG00000262919 | CCNQ       | -1.80E+00 | 1.83E-10 | 1.37E-09 |
| ENSG00000151612 | ZNF827     | -1.28E+00 | 1.91E-10 | 1.42E-09 |
| ENSG00000250321 | AC079140.2 | -1.69E+00 | 1.96E-10 | 1.46E-09 |
| ENSG00000159167 | STC1       | -2.01E+00 | 2.30E-10 | 1.71E-09 |
| ENSG00000047932 | GOPC       | -1.23E+00 | 2.34E-10 | 1.74E-09 |
| ENSG00000134419 | RPS15A     | -1.40E+00 | 2.37E-10 | 1.76E-09 |
| ENSG00000124508 | BTN2A2     | -2.18E+00 | 2.41E-10 | 1.78E-09 |
| ENSG00000134744 | TUT4       | -1.37E+00 | 2.41E-10 | 1.78E-09 |
| ENSG00000137054 | POLR1E     | -1.04E+00 | 2.42E-10 | 1.79E-09 |
| ENSG00000164953 | TMEM67     | -1.69E+00 | 2.42E-10 | 1.79E-09 |
| ENSG00000064042 | LIMCH1     | -1.44E+00 | 2.43E-10 | 1.79E-09 |
| ENSG00000138443 | ABI2       | -1.13E+00 | 2.44E-10 | 1.80E-09 |
| ENSG00000154839 | SKA1       | -1.20E+00 | 2.48E-10 | 1.82E-09 |
| ENSG00000138160 | KIF11      | -1.36E+00 | 2.53E-10 | 1.86E-09 |
| ENSG00000187837 | HIST1H1C   | -1.45E+00 | 2.54E-10 | 1.87E-09 |
| ENSG00000086712 | TXLNG      | -1.03E+00 | 2.62E-10 | 1.92E-09 |
| ENSG00000176273 | SLC35G1    | -1.63E+00 | 2.63E-10 | 1.93E-09 |
| ENSG00000196083 | IL1RAP     | -1.03E+00 | 2.66E-10 | 1.95E-09 |
| ENSG00000099385 | BCL7C      | -1.93E+00 | 2.67E-10 | 1.95E-09 |



|                 |            |           |          |          |
|-----------------|------------|-----------|----------|----------|
| ENSG00000140451 | PIF1       | -1.30E+00 | 2.69E-10 | 1.97E-09 |
| ENSG00000100767 | PAPLN      | -2.60E+00 | 2.88E-10 | 2.10E-09 |
| ENSG00000115318 | LOXL3      | -2.63E+00 | 2.88E-10 | 2.10E-09 |
| ENSG00000083845 | RPS5       | -1.40E+00 | 2.93E-10 | 2.14E-09 |
| ENSG00000112096 | SOD2       | -1.56E+00 | 2.95E-10 | 2.15E-09 |
| ENSG00000240771 | ARHGGEF25  | -2.85E+00 | 3.02E-10 | 2.20E-09 |
| ENSG00000154743 | TSEN2      | -1.91E+00 | 3.08E-10 | 2.24E-09 |
| ENSG00000115368 | WDR75      | -1.35E+00 | 3.17E-10 | 2.30E-09 |
| ENSG00000172638 | EFEMP2     | -1.40E+00 | 3.22E-10 | 2.34E-09 |
| ENSG00000176720 | BOK        | -1.54E+00 | 3.27E-10 | 2.37E-09 |
| ENSG00000237976 | AL391069.2 | -5.85E+00 | 3.30E-10 | 2.39E-09 |
| ENSG00000124006 | OBSL1      | -1.60E+00 | 3.44E-10 | 2.48E-09 |
| ENSG00000185432 | METTL7A    | -4.91E+00 | 3.51E-10 | 2.54E-09 |
| ENSG00000104660 | LEPROTL1   | -1.03E+00 | 3.58E-10 | 2.58E-09 |
| ENSG00000134222 | PSRC1      | -2.18E+00 | 3.70E-10 | 2.66E-09 |
| ENSG00000151414 | NEK7       | -1.31E+00 | 3.88E-10 | 2.79E-09 |
| ENSG00000152804 | HHEX       | -2.71E+00 | 3.88E-10 | 2.79E-09 |
| ENSG00000100911 | PSME2      | -1.07E+00 | 4.08E-10 | 2.93E-09 |
| ENSG00000164898 | FMC1       | -2.23E+00 | 4.24E-10 | 3.04E-09 |
| ENSG00000070018 | LRP6       | -1.19E+00 | 4.30E-10 | 3.08E-09 |
| ENSG00000111912 | NCOA7      | -1.10E+00 | 4.48E-10 | 3.20E-09 |
| ENSG00000169255 | B3GALNT1   | -1.57E+00 | 4.50E-10 | 3.21E-09 |
| ENSG00000197442 | MAP3K5     | -2.46E+00 | 4.54E-10 | 3.24E-09 |
| ENSG00000135390 | ATP5MC2    | -2.00E+00 | 4.66E-10 | 3.32E-09 |
| ENSG00000169599 | NFU1       | -1.42E+00 | 5.17E-10 | 3.68E-09 |
| ENSG00000185359 | HGS        | -1.06E+00 | 5.41E-10 | 3.84E-09 |
| ENSG00000118181 | RPS25      | -1.30E+00 | 5.55E-10 | 3.95E-09 |
| ENSG00000163214 | DHX57      | -1.53E+00 | 5.56E-10 | 3.95E-09 |
| ENSG00000168310 | IRF2       | -1.32E+00 | 5.73E-10 | 4.06E-09 |
| ENSG00000189046 | ALKBH2     | -1.48E+00 | 5.74E-10 | 4.07E-09 |
| ENSG00000137124 | ALDH1B1    | -1.57E+00 | 5.79E-10 | 4.10E-09 |
| ENSG00000198918 | RPL39      | -2.07E+00 | 5.86E-10 | 4.15E-09 |
| ENSG00000138035 | PNPT1      | -1.28E+00 | 5.91E-10 | 4.18E-09 |
| ENSG00000151338 | MIPOL1     | -1.40E+00 | 6.30E-10 | 4.44E-09 |
| ENSG00000115825 | PRKD3      | -1.19E+00 | 6.98E-10 | 4.90E-09 |
| ENSG00000172156 | CCL11      | -5.16E+00 | 7.17E-10 | 5.03E-09 |
| ENSG00000135596 | MICAL1     | -1.61E+00 | 7.20E-10 | 5.05E-09 |
| ENSG00000184005 | ST6GALNAC3 | -4.20E+00 | 7.56E-10 | 5.29E-09 |
| ENSG00000143157 | POGK       | -2.41E+00 | 7.59E-10 | 5.31E-09 |
| ENSG00000165996 | HACD1      | -2.45E+00 | 8.47E-10 | 5.91E-09 |

|                 |          |           |          |          |
|-----------------|----------|-----------|----------|----------|
| ENSG00000102390 | PBDC1    | -1.03E+00 | 9.13E-10 | 6.37E-09 |
| ENSG00000198042 | MAK16    | -1.27E+00 | 9.37E-10 | 6.52E-09 |
| ENSG00000140263 | SORD     | -2.86E+00 | 9.43E-10 | 6.56E-09 |
| ENSG00000110811 | P3H3     | -1.38E+00 | 9.55E-10 | 6.64E-09 |
| ENSG00000161888 | SPC24    | -1.46E+00 | 9.71E-10 | 6.75E-09 |
| ENSG00000239672 | NME1     | -1.49E+00 | 1.03E-09 | 7.11E-09 |
| ENSG00000186918 | ZNF395   | -1.64E+00 | 1.05E-09 | 7.25E-09 |
| ENSG00000168303 | MPLKIP   | -1.04E+00 | 1.06E-09 | 7.31E-09 |
| ENSG00000109189 | USP46    | -1.47E+00 | 1.06E-09 | 7.31E-09 |
| ENSG00000102271 | KLHL4    | -3.68E+00 | 1.14E-09 | 7.83E-09 |
| ENSG00000158042 | MRPL17   | -1.41E+00 | 1.16E-09 | 8.02E-09 |
| ENSG00000047230 | CTPS2    | -1.85E+00 | 1.18E-09 | 8.13E-09 |
| ENSG00000152413 | HOMER1   | -1.64E+00 | 1.20E-09 | 8.23E-09 |
| ENSG00000140945 | CDH13    | -1.05E+00 | 1.22E-09 | 8.37E-09 |
| ENSG00000182195 | LDOC1    | -1.45E+00 | 1.22E-09 | 8.37E-09 |
| ENSG00000124074 | ENKD1    | -1.33E+00 | 1.22E-09 | 8.41E-09 |
| ENSG00000170584 | NUDCD2   | -1.34E+00 | 1.26E-09 | 8.65E-09 |
| ENSG00000122034 | GTF3A    | -1.25E+00 | 1.27E-09 | 8.68E-09 |
| ENSG00000138796 | HADH     | -1.01E+00 | 1.28E-09 | 8.74E-09 |
| ENSG00000137726 | FXVD6    | -2.48E+00 | 1.32E-09 | 9.01E-09 |
| ENSG00000236609 | ZNF853   | -3.75E+00 | 1.38E-09 | 9.39E-09 |
| ENSG00000197958 | RPL12    | -1.41E+00 | 1.39E-09 | 9.47E-09 |
| ENSG00000056050 | HPF1     | -1.01E+00 | 1.43E-09 | 9.70E-09 |
| ENSG00000188158 | NHS      | -2.37E+00 | 1.44E-09 | 9.76E-09 |
| ENSG00000136205 | TNS3     | -1.86E+00 | 1.45E-09 | 9.82E-09 |
| ENSG00000197728 | RPS26    | -1.81E+00 | 1.46E-09 | 9.88E-09 |
| ENSG00000116649 | SRM      | -1.01E+00 | 1.59E-09 | 1.08E-08 |
| ENSG00000213445 | SIPA1    | -1.18E+00 | 1.61E-09 | 1.08E-08 |
| ENSG00000066855 | MTFR1    | -1.06E+00 | 1.62E-09 | 1.09E-08 |
| ENSG00000122952 | ZWINT    | -1.40E+00 | 1.66E-09 | 1.12E-08 |
| ENSG00000145681 | HAPLN1   | -2.11E+00 | 1.67E-09 | 1.13E-08 |
| ENSG00000138286 | FAM149B1 | -3.65E+00 | 1.75E-09 | 1.18E-08 |
| ENSG00000150636 | CCDC102B | -2.90E+00 | 1.82E-09 | 1.22E-08 |
| ENSG00000071994 | PDCD2    | -1.14E+00 | 1.87E-09 | 1.25E-08 |
| ENSG00000111850 | SMIM8    | -2.10E+00 | 1.88E-09 | 1.26E-08 |
| ENSG00000126088 | UROD     | -1.46E+00 | 1.90E-09 | 1.27E-08 |
| ENSG00000138002 | IFT172   | -3.43E+00 | 1.91E-09 | 1.28E-08 |
| ENSG00000165716 | DIPK1B   | -1.67E+00 | 1.94E-09 | 1.30E-08 |
| ENSG00000104356 | POP1     | -1.06E+00 | 2.15E-09 | 1.43E-08 |
| ENSG00000138382 | METTL5   | -1.29E+00 | 2.15E-09 | 1.43E-08 |

|                 |             |           |          |          |
|-----------------|-------------|-----------|----------|----------|
| ENSG00000146540 | C7orf50     | -1.35E+00 | 2.17E-09 | 1.44E-08 |
| ENSG00000112578 | BYSL        | -1.03E+00 | 2.18E-09 | 1.45E-08 |
| ENSG00000102309 | PIN4        | -1.78E+00 | 2.35E-09 | 1.56E-08 |
| ENSG00000120158 | RCL1        | -1.23E+00 | 2.73E-09 | 1.80E-08 |
| ENSG00000172965 | MIR4435-2HG | -1.31E+00 | 2.78E-09 | 1.83E-08 |
| ENSG00000156469 | MTERF3      | -1.39E+00 | 2.81E-09 | 1.85E-08 |
| ENSG00000066926 | FECH        | -1.67E+00 | 2.82E-09 | 1.86E-08 |
| ENSG00000224578 | HNRNPA1P48  | -1.72E+00 | 2.97E-09 | 1.95E-08 |
| ENSG00000239900 | ADSL        | -2.01E+00 | 2.98E-09 | 1.96E-08 |
| ENSG00000228594 | FNDC10      | -1.75E+00 | 3.09E-09 | 2.02E-08 |
| ENSG00000148803 | FUOM        | -2.98E+00 | 3.14E-09 | 2.05E-08 |
| ENSG00000134987 | WDR36       | -1.13E+00 | 3.21E-09 | 2.10E-08 |
| ENSG00000104219 | ZDHHC2      | -1.96E+00 | 3.25E-09 | 2.12E-08 |
| ENSG00000162851 | TFB2M       | -1.61E+00 | 3.44E-09 | 2.24E-08 |
| ENSG00000256537 | SMIM10L1    | -1.07E+00 | 3.60E-09 | 2.35E-08 |
| ENSG00000173145 | NOC3L       | -1.05E+00 | 3.67E-09 | 2.39E-08 |
| ENSG00000184887 | BTBD6       | -1.22E+00 | 3.74E-09 | 2.43E-08 |
| ENSG00000148082 | SHC3        | -3.06E+00 | 3.83E-09 | 2.49E-08 |
| ENSG00000174842 | GLMN        | -1.33E+00 | 3.85E-09 | 2.50E-08 |
| ENSG00000147889 | CDKN2A      | -1.83E+00 | 3.89E-09 | 2.53E-08 |
| ENSG00000121210 | TMEM131L    | -1.65E+00 | 3.92E-09 | 2.54E-08 |
| ENSG00000175426 | PCSK1       | -4.37E+00 | 4.05E-09 | 2.62E-08 |
| ENSG00000196497 | IPO4        | -2.37E+00 | 4.12E-09 | 2.67E-08 |
| ENSG00000105948 | TTC26       | -1.42E+00 | 4.15E-09 | 2.68E-08 |
| ENSG00000188352 | FOCAD       | -1.96E+00 | 4.23E-09 | 2.73E-08 |
| ENSG00000185480 | PARPBP      | -1.36E+00 | 4.51E-09 | 2.91E-08 |
| ENSG00000180739 | S1PR5       | -2.02E+00 | 4.70E-09 | 3.02E-08 |
| ENSG00000152253 | SPC25       | -1.51E+00 | 4.79E-09 | 3.07E-08 |
| ENSG00000163002 | NUP35       | -1.21E+00 | 5.03E-09 | 3.22E-08 |
| ENSG00000164687 | FABP5       | -3.18E+00 | 5.21E-09 | 3.33E-08 |
| ENSG00000115073 | ACTR1B      | -1.28E+00 | 5.26E-09 | 3.36E-08 |
| ENSG00000156787 | TBC1D31     | -1.12E+00 | 5.28E-09 | 3.38E-08 |
| ENSG00000112414 | ADGRG6      | -1.17E+00 | 5.73E-09 | 3.65E-08 |
| ENSG00000198467 | TPM2        | -1.37E+00 | 6.04E-09 | 3.84E-08 |
| ENSG00000156970 | BUB1B       | -1.28E+00 | 6.15E-09 | 3.91E-08 |
| ENSG00000162688 | AGL         | -1.37E+00 | 6.19E-09 | 3.93E-08 |
| ENSG00000138778 | CENPE       | -1.29E+00 | 6.26E-09 | 3.97E-08 |
| ENSG00000044090 | CUL7        | -1.44E+00 | 6.39E-09 | 4.05E-08 |
| ENSG00000143156 | NME7        | -1.53E+00 | 6.40E-09 | 4.06E-08 |
| ENSG00000145536 | ADAMTS16    | -2.03E+00 | 6.42E-09 | 4.07E-08 |

|                 |            |           |          |          |
|-----------------|------------|-----------|----------|----------|
| ENSG00000232774 | AL355916.1 | -4.28E+00 | 6.74E-09 | 4.26E-08 |
| ENSG00000166923 | GREM1      | -2.17E+00 | 7.16E-09 | 4.52E-08 |
| ENSG00000155850 | SLC26A2    | -1.23E+00 | 7.54E-09 | 4.75E-08 |
| ENSG00000287151 | C2orf27A   | -2.47E+00 | 7.91E-09 | 4.97E-08 |
| ENSG00000165259 | HDX        | -3.16E+00 | 7.92E-09 | 4.98E-08 |
| ENSG00000229659 | RPL26P6    | -1.40E+00 | 8.07E-09 | 5.06E-08 |
| ENSG00000139269 | INHBE      | -4.90E+00 | 8.28E-09 | 5.19E-08 |
| ENSG00000120647 | CCDC77     | -1.34E+00 | 8.39E-09 | 5.25E-08 |
| ENSG00000151287 | TEX30      | -1.09E+00 | 8.39E-09 | 5.25E-08 |
| ENSG00000116212 | LRRC42     | -1.04E+00 | 9.04E-09 | 5.65E-08 |
| ENSG00000172716 | SLFN11     | -2.05E+00 | 9.18E-09 | 5.73E-08 |
| ENSG00000092208 | GEMIN2     | -1.23E+00 | 9.24E-09 | 5.77E-08 |
| ENSG00000135622 | SEMA4F     | -2.46E+00 | 9.37E-09 | 5.84E-08 |
| ENSG00000139197 | PEX5       | -1.03E+00 | 9.41E-09 | 5.87E-08 |
| ENSG00000115325 | DOK1       | -1.74E+00 | 1.01E-08 | 6.26E-08 |
| ENSG00000204264 | PSMB8      | -1.21E+00 | 1.03E-08 | 6.37E-08 |
| ENSG00000126970 | ZC4H2      | -4.01E+00 | 1.04E-08 | 6.45E-08 |
| ENSG00000163682 | RPL9       | -1.44E+00 | 1.06E-08 | 6.59E-08 |
| ENSG00000137038 | DMAC1      | -1.52E+00 | 1.10E-08 | 6.78E-08 |
| ENSG00000124575 | HIST1H1D   | -1.31E+00 | 1.11E-08 | 6.85E-08 |
| ENSG00000100462 | PRMT5      | -1.05E+00 | 1.14E-08 | 7.05E-08 |
| ENSG00000109775 | UFSP2      | -1.19E+00 | 1.14E-08 | 7.05E-08 |
| ENSG00000147164 | SNX12      | -1.09E+00 | 1.16E-08 | 7.17E-08 |
| ENSG00000084774 | CAD        | -1.54E+00 | 1.22E-08 | 7.48E-08 |
| ENSG00000115526 | CHST10     | -1.45E+00 | 1.24E-08 | 7.61E-08 |
| ENSG00000185201 | IFITM2     | -1.24E+00 | 1.27E-08 | 7.80E-08 |
| ENSG00000173141 | MRPL57     | -1.54E+00 | 1.30E-08 | 7.94E-08 |
| ENSG00000164182 | NDUFAF2    | -1.77E+00 | 1.35E-08 | 8.25E-08 |
| ENSG00000185404 | SP140L     | -1.22E+00 | 1.41E-08 | 8.58E-08 |
| ENSG00000096092 | TMEM14A    | -1.11E+00 | 1.42E-08 | 8.64E-08 |
| ENSG00000131374 | TBC1D5     | -1.54E+00 | 1.43E-08 | 8.71E-08 |
| ENSG00000152256 | PDK1       | -1.43E+00 | 1.46E-08 | 8.89E-08 |
| ENSG00000132563 | REEP2      | -1.92E+00 | 1.47E-08 | 8.96E-08 |
| ENSG00000163516 | ANKZF1     | -1.41E+00 | 1.47E-08 | 8.96E-08 |
| ENSG00000198707 | CEP290     | -1.06E+00 | 1.50E-08 | 9.12E-08 |
| ENSG00000103356 | EARS2      | -1.20E+00 | 1.55E-08 | 9.44E-08 |
| ENSG00000213516 | RBMXL1     | -1.29E+00 | 1.61E-08 | 9.78E-08 |
| ENSG00000015532 | XYLT2      | -1.27E+00 | 1.64E-08 | 9.95E-08 |
| ENSG00000198331 | HYLS1      | -1.98E+00 | 1.75E-08 | 1.06E-07 |
| ENSG00000124191 | TOX2       | -1.17E+00 | 1.84E-08 | 1.11E-07 |

|                 |           |           |          |          |
|-----------------|-----------|-----------|----------|----------|
| ENSG00000154864 | PIEZO2    | -1.09E+00 | 1.85E-08 | 1.11E-07 |
| ENSG00000177697 | CD151     | -1.30E+00 | 1.89E-08 | 1.14E-07 |
| ENSG00000121775 | TMEM39B   | -1.41E+00 | 1.90E-08 | 1.14E-07 |
| ENSG00000142534 | RPS11     | -1.64E+00 | 1.97E-08 | 1.18E-07 |
| ENSG00000105393 | BABAM1    | -1.19E+00 | 1.97E-08 | 1.19E-07 |
| ENSG00000100426 | ZBED4     | -1.68E+00 | 1.98E-08 | 1.19E-07 |
| ENSG00000173821 | RNF213    | -1.10E+00 | 2.02E-08 | 1.21E-07 |
| ENSG00000158985 | CDC42SE2  | -1.28E+00 | 2.05E-08 | 1.23E-07 |
| ENSG00000100216 | TOMM22    | -1.40E+00 | 2.08E-08 | 1.25E-07 |
| ENSG00000122707 | RECK      | -1.36E+00 | 2.11E-08 | 1.26E-07 |
| ENSG00000131373 | HACL1     | -1.11E+00 | 2.14E-08 | 1.28E-07 |
| ENSG00000101115 | SALL4     | -1.62E+00 | 2.17E-08 | 1.30E-07 |
| ENSG00000107438 | PDLIM1    | -1.10E+00 | 2.18E-08 | 1.30E-07 |
| ENSG00000158122 | PRXL2C    | -2.08E+00 | 2.18E-08 | 1.30E-07 |
| ENSG00000164024 | METAP1    | -1.01E+00 | 2.22E-08 | 1.32E-07 |
| ENSG00000116918 | TSNAX     | -1.24E+00 | 2.25E-08 | 1.34E-07 |
| ENSG00000163872 | YEATS2    | -1.54E+00 | 2.30E-08 | 1.36E-07 |
| ENSG00000151413 | NUBPL     | -1.25E+00 | 2.31E-08 | 1.37E-07 |
| ENSG00000125354 | SEPTIN6   | -1.43E+00 | 2.34E-08 | 1.39E-07 |
| ENSG00000106399 | RPA3      | -1.11E+00 | 2.39E-08 | 1.42E-07 |
| ENSG00000102882 | MAPK3     | -1.32E+00 | 2.42E-08 | 1.43E-07 |
| ENSG00000131368 | MRPS25    | -1.25E+00 | 2.51E-08 | 1.49E-07 |
| ENSG00000140280 | LYSMD2    | -2.28E+00 | 2.61E-08 | 1.54E-07 |
| ENSG00000138613 | APH1B     | -2.38E+00 | 2.65E-08 | 1.56E-07 |
| ENSG00000160050 | CCDC28B   | -1.75E+00 | 2.65E-08 | 1.56E-07 |
| ENSG00000171155 | C1GALT1C1 | -1.15E+00 | 2.73E-08 | 1.61E-07 |
| ENSG00000164683 | HEY1      | -2.08E+00 | 2.73E-08 | 1.61E-07 |
| ENSG00000132589 | FLOT2     | -1.02E+00 | 2.75E-08 | 1.61E-07 |
| ENSG00000141510 | TP53      | -1.03E+00 | 2.76E-08 | 1.62E-07 |
| ENSG00000138346 | DNA2      | -1.36E+00 | 2.81E-08 | 1.65E-07 |
| ENSG00000116641 | DOCK7     | -1.26E+00 | 2.86E-08 | 1.67E-07 |
| ENSG00000172500 | FIBP      | -1.14E+00 | 2.88E-08 | 1.68E-07 |
| ENSG00000078401 | EDN1      | -2.13E+00 | 2.93E-08 | 1.71E-07 |
| ENSG00000132661 | NXT1      | -1.33E+00 | 2.94E-08 | 1.72E-07 |
| ENSG00000004779 | NDUFAB1   | -1.27E+00 | 3.03E-08 | 1.77E-07 |
| ENSG00000101132 | PFDN4     | -1.81E+00 | 3.06E-08 | 1.79E-07 |
| ENSG00000151790 | TDO2      | -3.72E+00 | 3.07E-08 | 1.79E-07 |
| ENSG00000172809 | RPL38     | -1.56E+00 | 3.14E-08 | 1.83E-07 |
| ENSG00000074319 | TSG101    | -1.03E+00 | 3.20E-08 | 1.86E-07 |
| ENSG00000158402 | CDC25C    | -1.67E+00 | 3.29E-08 | 1.91E-07 |

|                 |            |           |          |          |
|-----------------|------------|-----------|----------|----------|
| ENSG00000075188 | NUP37      | -1.10E+00 | 3.31E-08 | 1.92E-07 |
| ENSG00000156482 | RPL30      | -1.65E+00 | 3.38E-08 | 1.96E-07 |
| ENSG00000122870 | BICC1      | -1.80E+00 | 3.45E-08 | 2.00E-07 |
| ENSG00000267534 | S1PR2      | -1.84E+00 | 3.49E-08 | 2.02E-07 |
| ENSG00000124608 | AARS2      | -1.07E+00 | 3.54E-08 | 2.04E-07 |
| ENSG00000108688 | CCL7       | -5.44E+00 | 3.56E-08 | 2.06E-07 |
| ENSG00000163138 | PACRGL     | -1.57E+00 | 3.69E-08 | 2.13E-07 |
| ENSG00000205060 | SLC35B4    | -1.50E+00 | 3.74E-08 | 2.16E-07 |
| ENSG00000134851 | TMEM165    | -1.02E+00 | 3.77E-08 | 2.17E-07 |
| ENSG00000173207 | CKS1B      | -1.28E+00 | 3.92E-08 | 2.26E-07 |
| ENSG00000165915 | SLC39A13   | -1.36E+00 | 4.12E-08 | 2.37E-07 |
| ENSG00000100228 | RAB36      | -2.65E+00 | 4.20E-08 | 2.41E-07 |
| ENSG00000267002 | AC060780.1 | -1.53E+00 | 4.30E-08 | 2.47E-07 |
| ENSG00000082512 | TRAF5      | -1.86E+00 | 4.72E-08 | 2.70E-07 |
| ENSG00000147145 | LPAR4      | -5.67E+00 | 4.81E-08 | 2.75E-07 |
| ENSG00000037897 | METTL1     | -1.86E+00 | 5.14E-08 | 2.93E-07 |
| ENSG00000111880 | RNGTT      | -1.00E+00 | 5.17E-08 | 2.94E-07 |
| ENSG00000135083 | CCNJL      | -2.29E+00 | 5.19E-08 | 2.95E-07 |
| ENSG00000141480 | ARRB2      | -1.13E+00 | 5.26E-08 | 2.99E-07 |
| ENSG00000151500 | THYN1      | -1.04E+00 | 5.26E-08 | 2.99E-07 |
| ENSG00000106355 | LSM5       | -1.16E+00 | 5.53E-08 | 3.13E-07 |
| ENSG00000100583 | SAMD15     | -2.88E+00 | 5.73E-08 | 3.24E-07 |
| ENSG00000140044 | JDP2       | -1.81E+00 | 6.07E-08 | 3.42E-07 |
| ENSG00000165480 | SKA3       | -1.31E+00 | 6.13E-08 | 3.45E-07 |
| ENSG00000143977 | SNRPG      | -1.89E+00 | 6.17E-08 | 3.48E-07 |
| ENSG00000205871 | RPS3AP47   | -1.09E+00 | 6.27E-08 | 3.53E-07 |
| ENSG00000229117 | RPL41      | -1.30E+00 | 6.35E-08 | 3.57E-07 |
| ENSG00000168899 | VAMP5      | -1.74E+00 | 6.56E-08 | 3.68E-07 |
| ENSG00000134480 | CCNH       | -1.23E+00 | 6.73E-08 | 3.77E-07 |
| ENSG00000140386 | SCAPER     | -1.45E+00 | 6.82E-08 | 3.82E-07 |
| ENSG00000119636 | BBOF1      | -1.84E+00 | 6.94E-08 | 3.88E-07 |
| ENSG00000120800 | UTP20      | -1.28E+00 | 7.04E-08 | 3.93E-07 |
| ENSG00000154511 | DIPK1A     | -1.61E+00 | 7.63E-08 | 4.25E-07 |
| ENSG00000133315 | MACROD1    | -1.56E+00 | 7.76E-08 | 4.31E-07 |
| ENSG00000162836 | ACP6       | -2.86E+00 | 7.79E-08 | 4.33E-07 |
| ENSG00000143545 | RAB13      | -1.30E+00 | 7.92E-08 | 4.39E-07 |
| ENSG00000175061 | SNHG29     | -1.08E+00 | 7.94E-08 | 4.41E-07 |
| ENSG00000116830 | TTF2       | -1.35E+00 | 8.49E-08 | 4.69E-07 |
| ENSG00000007080 | CCDC124    | -1.08E+00 | 8.59E-08 | 4.75E-07 |
| ENSG00000102743 | SLC25A15   | -2.04E+00 | 8.64E-08 | 4.77E-07 |

|                 |           |           |          |          |
|-----------------|-----------|-----------|----------|----------|
| ENSG00000172123 | SLFN12    | -1.69E+00 | 8.68E-08 | 4.79E-07 |
| ENSG00000043514 | TRIT1     | -1.59E+00 | 8.74E-08 | 4.82E-07 |
| ENSG00000140382 | HMG20A    | -1.52E+00 | 8.96E-08 | 4.93E-07 |
| ENSG00000139146 | SINHCAF   | -1.17E+00 | 9.05E-08 | 4.98E-07 |
| ENSG00000112144 | ICK       | -1.39E+00 | 9.30E-08 | 5.12E-07 |
| ENSG00000133641 | C12orf29  | -1.09E+00 | 9.69E-08 | 5.32E-07 |
| ENSG00000088812 | ATRN      | -1.06E+00 | 9.94E-08 | 5.45E-07 |
| ENSG00000273888 | FRMD6-AS1 | -2.49E+00 | 1.01E-07 | 5.53E-07 |
| ENSG00000157214 | STEAP2    | -4.66E+00 | 1.01E-07 | 5.55E-07 |
| ENSG00000144713 | RPL32     | -1.87E+00 | 1.01E-07 | 5.55E-07 |
| ENSG00000132749 | TESMIN    | -5.51E+00 | 1.03E-07 | 5.63E-07 |
| ENSG00000189007 | ADAT2     | -2.54E+00 | 1.04E-07 | 5.70E-07 |
| ENSG00000188130 | MAPK12    | -1.68E+00 | 1.04E-07 | 5.71E-07 |
| ENSG00000148297 | MED22     | -1.39E+00 | 1.06E-07 | 5.80E-07 |
| ENSG00000106785 | TRIM14    | -1.32E+00 | 1.08E-07 | 5.88E-07 |
| ENSG00000150977 | RILPL2    | -1.41E+00 | 1.10E-07 | 6.01E-07 |
| ENSG00000198938 | MT-CO3    | -1.02E+00 | 1.13E-07 | 6.15E-07 |
| ENSG00000119979 | DENND10   | -1.42E+00 | 1.13E-07 | 6.17E-07 |
| ENSG00000099284 | H2AFY2    | -1.15E+00 | 1.14E-07 | 6.18E-07 |
| ENSG00000106266 | SNX8      | -1.38E+00 | 1.14E-07 | 6.21E-07 |
| ENSG00000133393 | FOPNL     | -1.03E+00 | 1.21E-07 | 6.53E-07 |
| ENSG00000184986 | TMEM121   | -1.93E+00 | 1.21E-07 | 6.57E-07 |
| ENSG00000119280 | C1orf198  | -1.07E+00 | 1.23E-07 | 6.65E-07 |
| ENSG00000234664 | HMG2N2P5  | -2.33E+00 | 1.26E-07 | 6.83E-07 |
| ENSG00000162980 | ARL5A     | -1.63E+00 | 1.29E-07 | 6.96E-07 |
| ENSG00000165533 | TTC8      | -1.85E+00 | 1.30E-07 | 7.00E-07 |
| ENSG00000006282 | SPATA20   | -1.13E+00 | 1.35E-07 | 7.25E-07 |
| ENSG00000182752 | PAPPA     | -1.73E+00 | 1.43E-07 | 7.70E-07 |
| ENSG00000124784 | RIOK1     | -1.02E+00 | 1.46E-07 | 7.87E-07 |
| ENSG00000168393 | DTYMK     | -1.12E+00 | 1.50E-07 | 8.03E-07 |
| ENSG00000243335 | KCTD7     | -1.75E+00 | 1.51E-07 | 8.09E-07 |
| ENSG00000185305 | ARL15     | -1.83E+00 | 1.53E-07 | 8.22E-07 |
| ENSG00000144034 | TPRKB     | -1.17E+00 | 1.54E-07 | 8.27E-07 |
| ENSG00000135446 | CDK4      | -1.09E+00 | 1.56E-07 | 8.38E-07 |
| ENSG00000092847 | AGO1      | -1.43E+00 | 1.58E-07 | 8.43E-07 |
| ENSG00000119927 | GPAM      | -1.89E+00 | 1.58E-07 | 8.44E-07 |
| ENSG00000138640 | FAM13A    | -1.74E+00 | 1.58E-07 | 8.45E-07 |
| ENSG00000124875 | CXCL6     | -4.26E+00 | 1.58E-07 | 8.46E-07 |
| ENSG00000070540 | WIPI1     | -1.97E+00 | 1.63E-07 | 8.70E-07 |
| ENSG00000071246 | VASH1     | -1.40E+00 | 1.70E-07 | 9.07E-07 |

|                 |            |           |          |          |
|-----------------|------------|-----------|----------|----------|
| ENSG00000247809 | NR2F2-AS1  | -4.31E+00 | 1.74E-07 | 9.27E-07 |
| ENSG00000188343 | FAM92A     | -1.07E+00 | 1.81E-07 | 9.59E-07 |
| ENSG00000173272 | MZT2A      | -1.58E+00 | 1.81E-07 | 9.61E-07 |
| ENSG00000177868 | SVBP       | -1.40E+00 | 1.89E-07 | 1.00E-06 |
| ENSG00000240024 | LINC00888  | -1.37E+00 | 1.92E-07 | 1.01E-06 |
| ENSG00000187049 | TMEM216    | -1.63E+00 | 1.94E-07 | 1.03E-06 |
| ENSG00000006015 | REX1BD     | -1.71E+00 | 1.94E-07 | 1.03E-06 |
| ENSG00000104524 | PYCR3      | -1.62E+00 | 2.03E-07 | 1.07E-06 |
| ENSG00000162430 | SELENON    | -1.40E+00 | 2.06E-07 | 1.09E-06 |
| ENSG00000138604 | GLCE       | -1.08E+00 | 2.08E-07 | 1.10E-06 |
| ENSG00000111906 | HDDC2      | -1.06E+00 | 2.10E-07 | 1.11E-06 |
| ENSG00000105193 | RPS16      | -1.24E+00 | 2.16E-07 | 1.14E-06 |
| ENSG00000149932 | TMEM219    | -1.39E+00 | 2.27E-07 | 1.20E-06 |
| ENSG00000173705 | SUSD5      | -1.00E+00 | 2.34E-07 | 1.23E-06 |
| ENSG00000145912 | NHP2       | -1.51E+00 | 2.38E-07 | 1.25E-06 |
| ENSG00000198931 | APRT       | -1.89E+00 | 2.40E-07 | 1.26E-06 |
| ENSG00000177613 | CSTF2T     | -1.13E+00 | 2.40E-07 | 1.26E-06 |
| ENSG00000181634 | TNFSF15    | -4.59E+00 | 2.48E-07 | 1.30E-06 |
| ENSG00000143801 | PSEN2      | -2.30E+00 | 2.50E-07 | 1.31E-06 |
| ENSG00000164330 | EBF1       | -2.31E+00 | 2.51E-07 | 1.31E-06 |
| ENSG00000147955 | SIGMAR1    | -1.07E+00 | 2.55E-07 | 1.33E-06 |
| ENSG00000235106 | BRD3OS     | -1.43E+00 | 2.58E-07 | 1.35E-06 |
| ENSG00000272763 | AC103702.2 | -1.87E+00 | 2.59E-07 | 1.35E-06 |
| ENSG00000235109 | ZSCAN31    | -2.71E+00 | 2.68E-07 | 1.39E-06 |
| ENSG00000146425 | DYNLT1     | -1.13E+00 | 2.76E-07 | 1.44E-06 |
| ENSG00000167994 | RAB3IL1    | -2.06E+00 | 2.91E-07 | 1.51E-06 |
| ENSG00000204381 | LAYN       | -1.62E+00 | 2.94E-07 | 1.52E-06 |
| ENSG00000118507 | AKAP7      | -2.01E+00 | 2.98E-07 | 1.54E-06 |
| ENSG00000173588 | CEP83      | -1.14E+00 | 3.03E-07 | 1.56E-06 |
| ENSG00000175198 | PCCA       | -1.26E+00 | 3.04E-07 | 1.57E-06 |
| ENSG00000138376 | BARD1      | -1.23E+00 | 3.12E-07 | 1.61E-06 |
| ENSG00000185420 | SMYD3      | -1.17E+00 | 3.17E-07 | 1.64E-06 |
| ENSG00000051825 | MPHOSPH9   | -1.24E+00 | 3.18E-07 | 1.64E-06 |
| ENSG00000115363 | EVA1A      | -2.48E+00 | 3.21E-07 | 1.66E-06 |
| ENSG00000106080 | FKBP14     | -1.02E+00 | 3.22E-07 | 1.66E-06 |
| ENSG00000169230 | PRELID1    | -1.23E+00 | 3.24E-07 | 1.67E-06 |
| ENSG00000132763 | MMACHC     | -2.72E+00 | 3.28E-07 | 1.69E-06 |
| ENSG00000089057 | SLC23A2    | -1.17E+00 | 3.31E-07 | 1.70E-06 |
| ENSG00000245694 | CRNDE      | -1.11E+00 | 3.31E-07 | 1.70E-06 |
| ENSG00000173660 | UQCRH      | -1.22E+00 | 3.51E-07 | 1.80E-06 |



|                 |              |           |          |          |
|-----------------|--------------|-----------|----------|----------|
| ENSG00000169992 | NLGN2        | -1.14E+00 | 3.53E-07 | 1.81E-06 |
| ENSG00000172889 | EGFL7        | -1.39E+00 | 3.64E-07 | 1.86E-06 |
| ENSG00000198130 | HIBCH        | -1.18E+00 | 3.68E-07 | 1.88E-06 |
| ENSG00000170293 | CMTM8        | -2.46E+00 | 3.75E-07 | 1.91E-06 |
| ENSG00000134809 | TIMM10       | -2.14E+00 | 3.77E-07 | 1.92E-06 |
| ENSG00000148143 | ZNF462       | -1.19E+00 | 3.87E-07 | 1.97E-06 |
| ENSG00000159199 | ATP5MC1      | -1.63E+00 | 3.88E-07 | 1.98E-06 |
| ENSG00000110104 | CCDC86       | -1.15E+00 | 3.93E-07 | 2.00E-06 |
| ENSG00000104047 | DTWD1        | -1.07E+00 | 4.07E-07 | 2.07E-06 |
| ENSG00000165617 | DACT1        | -2.03E+00 | 4.09E-07 | 2.07E-06 |
| ENSG00000053372 | MRTO4        | -1.03E+00 | 4.23E-07 | 2.14E-06 |
| ENSG00000164338 | UTP15        | -1.16E+00 | 4.34E-07 | 2.19E-06 |
| ENSG00000272047 | GTF2H5       | -1.04E+00 | 4.46E-07 | 2.25E-06 |
| ENSG00000162998 | FRZB         | -2.18E+00 | 4.52E-07 | 2.28E-06 |
| ENSG00000242299 | AC073861.1   | -1.30E+00 | 4.53E-07 | 2.29E-06 |
| ENSG00000184260 | HIST2H2AC    | -1.83E+00 | 4.56E-07 | 2.30E-06 |
| ENSG00000102359 | SRPX2        | -2.97E+00 | 4.66E-07 | 2.35E-06 |
| ENSG00000077713 | SLC25A43     | -2.81E+00 | 4.71E-07 | 2.37E-06 |
| ENSG00000103254 | ANTKMT       | -1.60E+00 | 4.73E-07 | 2.38E-06 |
| ENSG00000213347 | MXD3         | -1.55E+00 | 4.83E-07 | 2.43E-06 |
| ENSG00000115946 | PNO1         | -1.10E+00 | 4.85E-07 | 2.44E-06 |
| ENSG00000169129 | AFAP1L2      | -2.07E+00 | 4.93E-07 | 2.47E-06 |
| ENSG00000176894 | PXMP2        | -1.50E+00 | 5.01E-07 | 2.51E-06 |
| ENSG00000275835 | TUBGCP5      | -1.16E+00 | 5.04E-07 | 2.53E-06 |
| ENSG00000150627 | WDR17        | -4.65E+00 | 5.11E-07 | 2.56E-06 |
| ENSG00000227992 | AC108463.1   | -2.94E+00 | 5.17E-07 | 2.59E-06 |
| ENSG00000166450 | PRTG         | -1.16E+00 | 5.30E-07 | 2.65E-06 |
| ENSG00000144320 | LNPK         | -1.17E+00 | 5.40E-07 | 2.70E-06 |
| ENSG00000224032 | EPB41L4A-AS1 | -1.10E+00 | 5.40E-07 | 2.70E-06 |
| ENSG00000132432 | SEC61G       | -1.16E+00 | 5.42E-07 | 2.70E-06 |
| ENSG00000254004 | ZNF260       | -1.09E+00 | 5.42E-07 | 2.71E-06 |
| ENSG00000140988 | RPS2         | -1.06E+00 | 5.43E-07 | 2.71E-06 |
| ENSG00000182518 | FAM104B      | -1.95E+00 | 5.65E-07 | 2.82E-06 |
| ENSG00000050438 | SLC4A8       | -1.85E+00 | 5.97E-07 | 2.96E-06 |
| ENSG00000165060 | FXN          | -1.62E+00 | 6.08E-07 | 3.01E-06 |
| ENSG00000101546 | RBFA         | -1.16E+00 | 6.14E-07 | 3.04E-06 |
| ENSG00000111731 | C2CD5        | -1.25E+00 | 6.21E-07 | 3.07E-06 |
| ENSG00000100116 | GCAT         | -1.42E+00 | 6.26E-07 | 3.09E-06 |
| ENSG00000149483 | TMEM138      | -1.39E+00 | 6.45E-07 | 3.18E-06 |
| ENSG00000158863 | FAM160B2     | -1.41E+00 | 6.49E-07 | 3.20E-06 |

|                 |            |           |          |          |
|-----------------|------------|-----------|----------|----------|
| ENSG0000006327  | TNFRSF12A  | -1.34E+00 | 6.67E-07 | 3.29E-06 |
| ENSG00000182154 | MRPL41     | -1.74E+00 | 6.82E-07 | 3.36E-06 |
| ENSG00000165124 | SVEP1      | -1.83E+00 | 6.84E-07 | 3.37E-06 |
| ENSG00000138190 | EXOC6      | -1.23E+00 | 6.86E-07 | 3.37E-06 |
| ENSG00000151835 | SACS       | -1.00E+00 | 6.92E-07 | 3.40E-06 |
| ENSG00000153814 | JAZF1      | -1.73E+00 | 6.94E-07 | 3.41E-06 |
| ENSG00000064933 | PMS1       | -1.12E+00 | 7.03E-07 | 3.45E-06 |
| ENSG00000174547 | MRPL11     | -1.33E+00 | 7.20E-07 | 3.53E-06 |
| ENSG00000135912 | TTLL4      | -1.17E+00 | 7.29E-07 | 3.57E-06 |
| ENSG00000184384 | MAML2      | -2.79E+00 | 7.75E-07 | 3.78E-06 |
| ENSG00000250742 | LINC02381  | -1.12E+00 | 7.75E-07 | 3.78E-06 |
| ENSG00000146267 | FAXC       | -2.17E+00 | 8.06E-07 | 3.92E-06 |
| ENSG00000155100 | OTUD6B     | -1.07E+00 | 8.13E-07 | 3.95E-06 |
| ENSG00000170846 | AC093323.1 | -1.08E+00 | 8.21E-07 | 3.99E-06 |
| ENSG00000196632 | WNK3       | -1.63E+00 | 8.56E-07 | 4.15E-06 |
| ENSG00000244313 | AC024293.1 | -1.56E+00 | 8.61E-07 | 4.17E-06 |
| ENSG00000067445 | TRO        | -2.75E+00 | 8.86E-07 | 4.28E-06 |
| ENSG00000072840 | EVC        | -1.17E+00 | 8.90E-07 | 4.30E-06 |
| ENSG00000154328 | NEIL2      | -2.17E+00 | 8.93E-07 | 4.32E-06 |
| ENSG00000125703 | ATG4C      | -1.70E+00 | 9.10E-07 | 4.39E-06 |
| ENSG00000116791 | CRYZ       | -1.60E+00 | 9.13E-07 | 4.41E-06 |
| ENSG00000173218 | VANGL1     | -1.11E+00 | 9.17E-07 | 4.42E-06 |
| ENSG00000276368 | HIST1H2AJ  | -3.22E+00 | 9.50E-07 | 4.58E-06 |
| ENSG00000119285 | HEATR1     | -1.20E+00 | 9.51E-07 | 4.58E-06 |
| ENSG00000239559 | RPL37P2    | -1.50E+00 | 9.59E-07 | 4.61E-06 |
| ENSG00000065268 | WDR18      | -1.18E+00 | 9.60E-07 | 4.61E-06 |
| ENSG00000154237 | LRRK1      | -1.66E+00 | 9.59E-07 | 4.61E-06 |
| ENSG00000205544 | TMEM256    | -1.74E+00 | 9.60E-07 | 4.61E-06 |
| ENSG00000247095 | MIR210HG   | -3.59E+00 | 9.80E-07 | 4.70E-06 |
| ENSG00000232759 | AC002480.1 | -4.47E+00 | 9.99E-07 | 4.79E-06 |
| ENSG00000124802 | EEF1E1     | -1.09E+00 | 1.01E-06 | 4.85E-06 |
| ENSG00000143494 | VASH2      | -2.36E+00 | 1.02E-06 | 4.91E-06 |
| ENSG00000274565 | AC080038.1 | -3.84E+00 | 1.03E-06 | 4.96E-06 |
| ENSG00000166582 | CENPV      | -1.24E+00 | 1.13E-06 | 5.40E-06 |
| ENSG00000250317 | SMIM20     | -1.14E+00 | 1.14E-06 | 5.43E-06 |
| ENSG00000205208 | C4orf46    | -1.12E+00 | 1.15E-06 | 5.47E-06 |
| ENSG00000184602 | SNN        | -1.10E+00 | 1.17E-06 | 5.56E-06 |
| ENSG00000144362 | PHOSPHO2   | -3.00E+00 | 1.19E-06 | 5.67E-06 |
| ENSG00000174886 | NDUFA11    | -1.96E+00 | 1.20E-06 | 5.72E-06 |
| ENSG00000169598 | DFFB       | -3.00E+00 | 1.23E-06 | 5.83E-06 |

|                 |           |           |          |          |
|-----------------|-----------|-----------|----------|----------|
| ENSG00000139998 | RAB15     | -1.91E+00 | 1.23E-06 | 5.84E-06 |
| ENSG00000137502 | RAB30     | -1.33E+00 | 1.30E-06 | 6.13E-06 |
| ENSG00000113448 | PDE4D     | -1.19E+00 | 1.31E-06 | 6.17E-06 |
| ENSG00000056998 | GYG2      | -4.36E+00 | 1.31E-06 | 6.19E-06 |
| ENSG00000105483 | CARD8     | -1.04E+00 | 1.36E-06 | 6.40E-06 |
| ENSG00000056277 | ZNF280C   | -2.00E+00 | 1.36E-06 | 6.41E-06 |
| ENSG00000164758 | MED30     | -1.29E+00 | 1.41E-06 | 6.63E-06 |
| ENSG00000064199 | SPA17     | -1.24E+00 | 1.42E-06 | 6.68E-06 |
| ENSG00000117411 | B4GALT2   | -1.10E+00 | 1.50E-06 | 7.03E-06 |
| ENSG00000156990 | RPUSD3    | -1.16E+00 | 1.51E-06 | 7.09E-06 |
| ENSG00000164603 | BMT2      | -1.48E+00 | 1.52E-06 | 7.13E-06 |
| ENSG00000055147 | FAM114A2  | -1.39E+00 | 1.66E-06 | 7.77E-06 |
| ENSG00000163517 | HDAC11    | -2.64E+00 | 1.76E-06 | 8.21E-06 |
| ENSG00000113272 | THG1L     | -1.48E+00 | 1.79E-06 | 8.32E-06 |
| ENSG00000129195 | PIMREG    | -1.13E+00 | 1.79E-06 | 8.32E-06 |
| ENSG00000180998 | GPR137C   | -1.39E+00 | 1.79E-06 | 8.33E-06 |
| ENSG00000176182 | MYPOP     | -1.02E+00 | 1.81E-06 | 8.43E-06 |
| ENSG00000144199 | FAHD2B    | -2.62E+00 | 1.83E-06 | 8.48E-06 |
| ENSG00000172336 | POP7      | -1.17E+00 | 1.84E-06 | 8.55E-06 |
| ENSG00000163006 | CCDC138   | -1.24E+00 | 1.85E-06 | 8.56E-06 |
| ENSG00000059588 | TARBP1    | -1.27E+00 | 1.86E-06 | 8.62E-06 |
| ENSG00000033122 | LRRC7     | -3.63E+00 | 1.87E-06 | 8.67E-06 |
| ENSG00000263266 | RPS7P1    | -1.26E+00 | 1.88E-06 | 8.71E-06 |
| ENSG00000133704 | IPO8      | -1.32E+00 | 1.89E-06 | 8.76E-06 |
| ENSG00000102078 | SLC25A14  | -1.23E+00 | 1.90E-06 | 8.77E-06 |
| ENSG00000136783 | NIPSNAP3A | -1.50E+00 | 1.90E-06 | 8.77E-06 |
| ENSG00000117602 | RCAN3     | -2.01E+00 | 1.98E-06 | 9.15E-06 |
| ENSG00000086827 | ZW10      | -1.06E+00 | 1.99E-06 | 9.20E-06 |
| ENSG00000164306 | PRIMPOL   | -1.90E+00 | 2.07E-06 | 9.52E-06 |
| ENSG00000073150 | PANX2     | -1.70E+00 | 2.09E-06 | 9.63E-06 |
| ENSG00000213741 | RPS29     | -1.96E+00 | 2.10E-06 | 9.66E-06 |
| ENSG00000101850 | GPR143    | -4.52E+00 | 2.12E-06 | 9.76E-06 |
| ENSG00000163378 | EOGT      | -1.28E+00 | 2.13E-06 | 9.82E-06 |
| ENSG00000136942 | RPL35     | -2.20E+00 | 2.14E-06 | 9.85E-06 |
| ENSG00000174516 | PELI3     | -2.05E+00 | 2.15E-06 | 9.89E-06 |
| ENSG00000129480 | DTD2      | -1.38E+00 | 2.25E-06 | 1.03E-05 |
| ENSG00000165775 | FUNDC2    | -1.03E+00 | 2.29E-06 | 1.05E-05 |
| ENSG00000134461 | ANKRD16   | -2.44E+00 | 2.34E-06 | 1.07E-05 |
| ENSG00000138085 | ATRAID    | -1.31E+00 | 2.35E-06 | 1.07E-05 |
| ENSG00000153976 | HS3ST3A1  | -2.67E+00 | 2.41E-06 | 1.10E-05 |

|                 |             |           |          |          |
|-----------------|-------------|-----------|----------|----------|
| ENSG0000058600  | POLR3E      | -1.00E+00 | 2.42E-06 | 1.10E-05 |
| ENSG00000169131 | ZNF354A     | -1.22E+00 | 2.44E-06 | 1.11E-05 |
| ENSG00000117069 | ST6GALNAC5  | -3.67E+00 | 2.44E-06 | 1.11E-05 |
| ENSG00000196368 | NUDT11      | -2.30E+00 | 2.45E-06 | 1.12E-05 |
| ENSG00000100578 | KIAA0586    | -1.11E+00 | 2.51E-06 | 1.14E-05 |
| ENSG00000107951 | MTPAP       | -1.13E+00 | 2.57E-06 | 1.17E-05 |
| ENSG00000140987 | ZSCAN32     | -1.01E+00 | 2.65E-06 | 1.21E-05 |
| ENSG00000119408 | NEK6        | -1.42E+00 | 2.71E-06 | 1.23E-05 |
| ENSG00000171051 | FPR1        | -5.08E+00 | 2.77E-06 | 1.26E-05 |
| ENSG00000240972 | MIF         | -1.69E+00 | 2.80E-06 | 1.27E-05 |
| ENSG00000138336 | TET1        | -2.07E+00 | 2.81E-06 | 1.28E-05 |
| ENSG00000269293 | ZSCAN16-AS1 | -1.60E+00 | 2.85E-06 | 1.29E-05 |
| ENSG00000165730 | STOX1       | -1.96E+00 | 2.89E-06 | 1.31E-05 |
| ENSG00000178033 | CALHM5      | -2.73E+00 | 2.91E-06 | 1.32E-05 |
| ENSG00000082516 | GEMIN5      | -1.04E+00 | 2.93E-06 | 1.33E-05 |
| ENSG00000166444 | ST5         | -1.21E+00 | 2.95E-06 | 1.33E-05 |
| ENSG00000237550 | AC243919.1  | -1.22E+00 | 2.97E-06 | 1.34E-05 |
| ENSG00000050344 | NFE2L3      | -1.40E+00 | 2.97E-06 | 1.34E-05 |
| ENSG00000074582 | BCS1L       | -1.20E+00 | 2.98E-06 | 1.35E-05 |
| ENSG00000127995 | CASD1       | -1.58E+00 | 3.00E-06 | 1.35E-05 |
| ENSG00000114923 | SLC4A3      | -1.59E+00 | 3.13E-06 | 1.41E-05 |
| ENSG00000104213 | PDGFRL      | -3.18E+00 | 3.16E-06 | 1.42E-05 |
| ENSG00000137970 | RPL7P9      | -1.01E+00 | 3.20E-06 | 1.44E-05 |
| ENSG00000145819 | ARHGAP26    | -1.14E+00 | 3.22E-06 | 1.45E-05 |
| ENSG00000063177 | RPL18       | -1.50E+00 | 3.40E-06 | 1.52E-05 |
| ENSG00000136732 | GYPC        | -1.87E+00 | 3.41E-06 | 1.53E-05 |
| ENSG00000137404 | NRM         | -1.20E+00 | 3.45E-06 | 1.54E-05 |
| ENSG00000188641 | DPYD        | -1.57E+00 | 3.47E-06 | 1.55E-05 |
| ENSG00000180822 | PSMG4       | -1.75E+00 | 3.53E-06 | 1.58E-05 |
| ENSG00000263001 | GTF2I       | -1.07E+00 | 3.61E-06 | 1.61E-05 |
| ENSG00000167535 | CACNB3      | -1.30E+00 | 3.71E-06 | 1.65E-05 |
| ENSG00000172379 | ARNT2       | -1.19E+00 | 3.87E-06 | 1.72E-05 |
| ENSG00000167526 | RPL13       | -1.39E+00 | 3.90E-06 | 1.73E-05 |
| ENSG00000170464 | DNAJC18     | -1.18E+00 | 3.97E-06 | 1.76E-05 |
| ENSG00000178802 | MPI         | -1.12E+00 | 4.00E-06 | 1.78E-05 |
| ENSG00000136213 | CHST12      | -1.30E+00 | 4.05E-06 | 1.79E-05 |
| ENSG00000183723 | CMTM4       | -1.31E+00 | 4.09E-06 | 1.81E-05 |
| ENSG00000066379 | ZNRD1       | -1.19E+00 | 4.21E-06 | 1.86E-05 |
| ENSG00000151366 | NDUFC2      | -1.16E+00 | 4.26E-06 | 1.88E-05 |
| ENSG00000173163 | COMMD1      | -1.70E+00 | 4.26E-06 | 1.88E-05 |

|                 |            |           |          |          |
|-----------------|------------|-----------|----------|----------|
| ENSG00000133740 | E2F5       | -2.69E+00 | 4.30E-06 | 1.89E-05 |
| ENSG00000262814 | MRPL12     | -1.69E+00 | 4.37E-06 | 1.92E-05 |
| ENSG00000214293 | APTR       | -1.41E+00 | 4.56E-06 | 2.00E-05 |
| ENSG00000108176 | DNAJC12    | -2.13E+00 | 4.60E-06 | 2.02E-05 |
| ENSG00000105552 | BCAT2      | -1.03E+00 | 4.79E-06 | 2.10E-05 |
| ENSG00000148824 | MTG1       | -1.08E+00 | 4.86E-06 | 2.13E-05 |
| ENSG00000176731 | RBIS       | -1.15E+00 | 5.07E-06 | 2.21E-05 |
| ENSG00000253250 | C8orf88    | -1.37E+00 | 5.17E-06 | 2.25E-05 |
| ENSG00000149380 | P4HA3      | -2.71E+00 | 5.17E-06 | 2.25E-05 |
| ENSG00000134470 | IL15RA     | -1.73E+00 | 5.22E-06 | 2.27E-05 |
| ENSG00000180035 | ZNF48      | -1.56E+00 | 5.28E-06 | 2.30E-05 |
| ENSG00000170049 | KCNAB3     | -2.30E+00 | 5.55E-06 | 2.41E-05 |
| ENSG00000150551 | LYPD1      | -1.75E+00 | 5.72E-06 | 2.47E-05 |
| ENSG00000152078 | TLCD4      | -2.12E+00 | 5.87E-06 | 2.54E-05 |
| ENSG00000117153 | KLHL12     | -1.16E+00 | 5.89E-06 | 2.54E-05 |
| ENSG00000103707 | MTFMT      | -1.26E+00 | 5.97E-06 | 2.58E-05 |
| ENSG00000274015 | AL136038.5 | -2.61E+00 | 6.46E-06 | 2.78E-05 |
| ENSG00000114993 | RTKN       | -2.02E+00 | 6.72E-06 | 2.88E-05 |
| ENSG00000277972 | CISD3      | -1.43E+00 | 6.73E-06 | 2.89E-05 |
| ENSG00000198585 | NUDT16     | -1.06E+00 | 6.87E-06 | 2.95E-05 |
| ENSG00000008394 | MGST1      | -1.13E+00 | 6.97E-06 | 2.99E-05 |
| ENSG00000164220 | F2RL2      | -3.40E+00 | 7.07E-06 | 3.03E-05 |
| ENSG00000163257 | DCAF16     | -1.16E+00 | 7.16E-06 | 3.06E-05 |
| ENSG00000180628 | PCGF5      | -1.05E+00 | 7.26E-06 | 3.10E-05 |
| ENSG00000175414 | ARL10      | -1.64E+00 | 7.36E-06 | 3.14E-05 |
| ENSG00000269893 | SNHG8      | -1.60E+00 | 7.43E-06 | 3.17E-05 |
| ENSG00000143314 | MRPL24     | -1.23E+00 | 7.44E-06 | 3.17E-05 |
| ENSG00000163710 | PCOLCE2    | -1.07E+00 | 7.45E-06 | 3.18E-05 |
| ENSG00000100167 | SEPTIN3    | -1.92E+00 | 7.58E-06 | 3.23E-05 |
| ENSG00000106683 | LIMK1      | -1.19E+00 | 7.72E-06 | 3.28E-05 |
| ENSG00000091656 | ZFHX4      | -1.14E+00 | 7.72E-06 | 3.28E-05 |
| ENSG00000241945 | PWP2       | -1.97E+00 | 7.84E-06 | 3.33E-05 |
| ENSG00000163093 | BBS5       | -2.03E+00 | 7.92E-06 | 3.36E-05 |
| ENSG00000137274 | BPHL       | -1.35E+00 | 7.95E-06 | 3.37E-05 |
| ENSG00000064547 | LPAR2      | -1.18E+00 | 7.96E-06 | 3.38E-05 |
| ENSG00000112365 | ZBTB24     | -1.05E+00 | 8.03E-06 | 3.40E-05 |
| ENSG00000153404 | PLEKHG4B   | -2.08E+00 | 8.04E-06 | 3.41E-05 |
| ENSG00000107882 | SUFU       | -1.59E+00 | 8.14E-06 | 3.45E-05 |
| ENSG00000226532 | AL022718.1 | -1.74E+00 | 8.18E-06 | 3.47E-05 |
| ENSG00000136630 | HLX        | -2.29E+00 | 8.49E-06 | 3.59E-05 |

|                 |              |           |          |          |
|-----------------|--------------|-----------|----------|----------|
| ENSG00000135931 | ARMC9        | -1.13E+00 | 8.90E-06 | 3.75E-05 |
| ENSG00000281398 | SNHG4        | -2.36E+00 | 8.94E-06 | 3.77E-05 |
| ENSG00000138835 | RGS3         | -1.32E+00 | 9.35E-06 | 3.93E-05 |
| ENSG00000185641 | AC034236.1   | -1.29E+00 | 9.42E-06 | 3.96E-05 |
| ENSG00000116906 | GNPAT        | -1.01E+00 | 9.47E-06 | 3.98E-05 |
| ENSG00000135245 | HILPDA       | -1.16E+00 | 9.54E-06 | 4.01E-05 |
| ENSG00000236682 | MAP3K2-DT    | -2.16E+00 | 9.67E-06 | 4.06E-05 |
| ENSG00000277149 | TYW1B        | -1.72E+00 | 9.69E-06 | 4.07E-05 |
| ENSG00000165629 | ATP5F1C      | -1.05E+00 | 1.01E-05 | 4.22E-05 |
| ENSG00000139514 | SLC7A1       | -1.01E+00 | 1.01E-05 | 4.24E-05 |
| ENSG00000137818 | RPLP1        | -1.75E+00 | 1.03E-05 | 4.30E-05 |
| ENSG00000152082 | MZT2B        | -1.72E+00 | 1.05E-05 | 4.36E-05 |
| ENSG00000203875 | SNHG5        | -1.09E+00 | 1.08E-05 | 4.48E-05 |
| ENSG00000257596 | SCAT2        | -5.40E+00 | 1.08E-05 | 4.49E-05 |
| ENSG00000222041 | CYTOR        | -1.23E+00 | 1.09E-05 | 4.53E-05 |
| ENSG00000196636 | SDHAF3       | -1.91E+00 | 1.11E-05 | 4.63E-05 |
| ENSG00000090924 | PLEKHG2      | -1.03E+00 | 1.12E-05 | 4.67E-05 |
| ENSG00000136122 | BORA         | -1.47E+00 | 1.15E-05 | 4.78E-05 |
| ENSG00000163888 | CAMK2N2      | -1.78E+00 | 1.16E-05 | 4.80E-05 |
| ENSG00000241494 | AL355032.1   | -1.65E+00 | 1.18E-05 | 4.91E-05 |
| ENSG00000143341 | HMCN1        | -2.34E+00 | 1.19E-05 | 4.93E-05 |
| ENSG00000171530 | TBCA         | -1.16E+00 | 1.20E-05 | 4.96E-05 |
| ENSG00000127540 | UQCR11       | -1.58E+00 | 1.20E-05 | 4.96E-05 |
| ENSG00000224459 | SLC25A34-AS1 | -5.81E+00 | 1.21E-05 | 4.99E-05 |
| ENSG00000074181 | NOTCH3       | -1.33E+00 | 1.21E-05 | 5.01E-05 |
| ENSG00000157557 | ETS2         | -1.02E+00 | 1.22E-05 | 5.04E-05 |
| ENSG00000019485 | PRDM11       | -2.13E+00 | 1.22E-05 | 5.05E-05 |
| ENSG00000205542 | TMSB4X       | -1.45E+00 | 1.23E-05 | 5.07E-05 |
| ENSG00000129472 | RAB2B        | -1.01E+00 | 1.23E-05 | 5.08E-05 |
| ENSG00000111752 | PHC1         | -1.80E+00 | 1.23E-05 | 5.09E-05 |
| ENSG00000114790 | ARHGEF26     | -1.20E+00 | 1.24E-05 | 5.10E-05 |
| ENSG00000196917 | HCAR1        | -4.95E+00 | 1.24E-05 | 5.12E-05 |
| ENSG00000159110 | IFNAR2       | -1.11E+00 | 1.28E-05 | 5.25E-05 |
| ENSG00000169621 | APLF         | -2.10E+00 | 1.29E-05 | 5.29E-05 |
| ENSG00000276345 | AC004556.3   | -1.53E+00 | 1.29E-05 | 5.29E-05 |
| ENSG00000170915 | PAQR8        | -3.47E+00 | 1.30E-05 | 5.32E-05 |
| ENSG00000186792 | HYAL3        | -2.18E+00 | 1.32E-05 | 5.40E-05 |
| ENSG00000042088 | TDP1         | -1.36E+00 | 1.37E-05 | 5.60E-05 |
| ENSG00000185869 | ZNF829       | -1.13E+00 | 1.37E-05 | 5.61E-05 |
| ENSG00000166886 | NAB2         | -1.23E+00 | 1.39E-05 | 5.68E-05 |

|                 |            |           |          |          |
|-----------------|------------|-----------|----------|----------|
| ENSG00000137513 | NARS2      | -1.29E+00 | 1.39E-05 | 5.69E-05 |
| ENSG00000108984 | MAP2K6     | -3.45E+00 | 1.41E-05 | 5.74E-05 |
| ENSG00000100626 | GALNT16    | -1.92E+00 | 1.41E-05 | 5.75E-05 |
| ENSG00000182899 | RPL35A     | -1.30E+00 | 1.43E-05 | 5.81E-05 |
| ENSG00000117016 | RIMS3      | -3.09E+00 | 1.44E-05 | 5.88E-05 |
| ENSG00000151458 | ANKRD50    | -1.15E+00 | 1.45E-05 | 5.91E-05 |
| ENSG00000183763 | TRAIP      | -1.25E+00 | 1.46E-05 | 5.93E-05 |
| ENSG00000137312 | FLOT1      | -1.04E+00 | 1.48E-05 | 6.02E-05 |
| ENSG00000114125 | RNF7       | -1.02E+00 | 1.53E-05 | 6.22E-05 |
| ENSG00000126953 | TIMM8A     | -1.22E+00 | 1.53E-05 | 6.22E-05 |
| ENSG00000123545 | NDUFAF4    | -1.22E+00 | 1.57E-05 | 6.35E-05 |
| ENSG00000213058 | AL365357.1 | -1.33E+00 | 1.57E-05 | 6.36E-05 |
| ENSG00000172469 | MANEA      | -1.22E+00 | 1.58E-05 | 6.40E-05 |
| ENSG00000183828 | NUDT14     | -1.93E+00 | 1.58E-05 | 6.41E-05 |
| ENSG00000104299 | INTS9      | -1.10E+00 | 1.61E-05 | 6.49E-05 |
| ENSG00000186416 | NKRF       | -1.06E+00 | 1.64E-05 | 6.61E-05 |
| ENSG00000115425 | PECR       | -1.50E+00 | 1.64E-05 | 6.63E-05 |
| ENSG00000167397 | VKORC1     | -1.41E+00 | 1.66E-05 | 6.68E-05 |
| ENSG00000251348 | HSPD1P11   | -4.27E+00 | 1.67E-05 | 6.73E-05 |
| ENSG00000099330 | OCEL1      | -1.48E+00 | 1.67E-05 | 6.75E-05 |
| ENSG00000105640 | RPL18A     | -1.64E+00 | 1.69E-05 | 6.82E-05 |
| ENSG00000272599 | AC016394.2 | -2.02E+00 | 1.75E-05 | 7.04E-05 |
| ENSG00000048342 | CC2D2A     | -1.97E+00 | 1.75E-05 | 7.06E-05 |
| ENSG00000082515 | MRPL22     | -1.02E+00 | 1.76E-05 | 7.07E-05 |
| ENSG00000112294 | ALDH5A1    | -2.20E+00 | 1.79E-05 | 7.20E-05 |
| ENSG00000129354 | AP1M2      | -1.80E+00 | 1.81E-05 | 7.28E-05 |
| ENSG00000226674 | TEX41      | -4.06E+00 | 1.82E-05 | 7.31E-05 |
| ENSG00000128872 | TMOD2      | -2.97E+00 | 1.84E-05 | 7.37E-05 |
| ENSG00000115840 | SLC25A12   | -1.48E+00 | 1.86E-05 | 7.43E-05 |
| ENSG00000185842 | DNAH14     | -1.38E+00 | 1.86E-05 | 7.43E-05 |
| ENSG00000126453 | BCL2L12    | -1.04E+00 | 1.86E-05 | 7.43E-05 |
| ENSG00000150456 | EEF1AKMT1  | -1.52E+00 | 1.91E-05 | 7.63E-05 |
| ENSG00000157870 | PRXL2B     | -1.24E+00 | 1.93E-05 | 7.72E-05 |
| ENSG00000162650 | ATXN7L2    | -1.47E+00 | 1.94E-05 | 7.74E-05 |
| ENSG00000099999 | RNF215     | -1.80E+00 | 1.97E-05 | 7.87E-05 |
| ENSG00000003509 | NDUFAF7    | -1.18E+00 | 1.98E-05 | 7.89E-05 |
| ENSG00000172878 | METAP1D    | -1.99E+00 | 2.00E-05 | 7.95E-05 |
| ENSG00000114544 | SLC41A3    | -1.23E+00 | 2.01E-05 | 8.01E-05 |
| ENSG00000188321 | ZNF559     | -1.51E+00 | 2.03E-05 | 8.07E-05 |
| ENSG00000107249 | GLIS3      | -1.10E+00 | 2.12E-05 | 8.39E-05 |

|                 |            |           |          |          |
|-----------------|------------|-----------|----------|----------|
| ENSG00000077092 | RARB       | -5.48E+00 | 2.15E-05 | 8.51E-05 |
| ENSG00000135338 | LCA5       | -1.83E+00 | 2.16E-05 | 8.57E-05 |
| ENSG00000232445 | AC006329.1 | -1.47E+00 | 2.19E-05 | 8.65E-05 |
| ENSG00000262185 | AC005736.1 | -4.09E+00 | 2.21E-05 | 8.73E-05 |
| ENSG00000137288 | UQCC2      | -1.09E+00 | 2.22E-05 | 8.78E-05 |
| ENSG00000198468 | FLVCR1-DT  | -1.31E+00 | 2.23E-05 | 8.82E-05 |
| ENSG00000107562 | CXCL12     | -2.33E+00 | 2.25E-05 | 8.86E-05 |
| ENSG00000131495 | NDUFA2     | -1.20E+00 | 2.29E-05 | 9.01E-05 |
| ENSG00000081041 | CXCL2      | -3.45E+00 | 2.35E-05 | 9.24E-05 |
| ENSG00000242498 | ARPIN      | -2.10E+00 | 2.45E-05 | 9.61E-05 |
| ENSG00000141569 | TRIM65     | -1.09E+00 | 2.47E-05 | 9.67E-05 |
| ENSG00000162437 | RAVER2     | -1.30E+00 | 2.48E-05 | 9.71E-05 |
| ENSG00000107186 | MPDZ       | -1.08E+00 | 2.50E-05 | 9.81E-05 |
| ENSG00000126785 | RHOJ       | -4.42E+00 | 2.51E-05 | 9.84E-05 |
| ENSG00000010361 | FUZ        | -1.44E+00 | 2.63E-05 | 1.03E-04 |
| ENSG00000179841 | AKAP5      | -2.23E+00 | 2.64E-05 | 1.03E-04 |
| ENSG00000226445 | BX322234.1 | -1.78E+00 | 2.69E-05 | 1.05E-04 |
| ENSG00000237190 | CDKN2AIPNL | -1.09E+00 | 2.77E-05 | 1.08E-04 |
| ENSG00000203805 | PLPP4      | -2.59E+00 | 2.84E-05 | 1.10E-04 |
| ENSG00000117569 | PTBP2      | -1.40E+00 | 2.87E-05 | 1.11E-04 |
| ENSG00000172922 | RNASEH2C   | -1.32E+00 | 2.91E-05 | 1.13E-04 |
| ENSG00000177556 | ATOX1      | -1.19E+00 | 2.92E-05 | 1.13E-04 |
| ENSG00000251602 | AL928654.1 | -2.84E+00 | 2.96E-05 | 1.15E-04 |
| ENSG00000139266 | MARCH9     | -1.18E+00 | 3.04E-05 | 1.18E-04 |
| ENSG00000072422 | RHOBTB1    | -1.84E+00 | 3.08E-05 | 1.19E-04 |
| ENSG00000175768 | TOMM5      | -1.63E+00 | 3.10E-05 | 1.19E-04 |
| ENSG00000204852 | TCTN1      | -1.07E+00 | 3.12E-05 | 1.20E-04 |
| ENSG00000217555 | CKLF       | -1.29E+00 | 3.15E-05 | 1.21E-04 |
| ENSG00000185634 | SHC4       | -2.37E+00 | 3.16E-05 | 1.22E-04 |
| ENSG00000137218 | FRS3       | -3.11E+00 | 3.23E-05 | 1.24E-04 |
| ENSG00000249867 | LINC02742  | -4.79E+00 | 3.28E-05 | 1.26E-04 |
| ENSG00000167695 | TLCD3A     | -1.17E+00 | 3.34E-05 | 1.28E-04 |
| ENSG00000215030 | RPL13P12   | -1.04E+00 | 3.35E-05 | 1.29E-04 |
| ENSG00000109390 | NDUFC1     | -1.02E+00 | 3.40E-05 | 1.31E-04 |
| ENSG00000265972 | TXNIP      | -1.77E+00 | 3.43E-05 | 1.32E-04 |
| ENSG00000250562 | RPL38P4    | -2.60E+00 | 3.48E-05 | 1.33E-04 |
| ENSG00000143224 | PPOX       | -1.22E+00 | 3.52E-05 | 1.35E-04 |
| ENSG00000132953 | XPO4       | -1.25E+00 | 3.64E-05 | 1.39E-04 |
| ENSG00000133640 | LRRIQ1     | -2.25E+00 | 3.67E-05 | 1.40E-04 |
| ENSG00000102384 | CENPI      | -1.11E+00 | 3.69E-05 | 1.41E-04 |



|                 |            |           |          |          |
|-----------------|------------|-----------|----------|----------|
| ENSG00000163453 | IGFBP7     | -1.56E+00 | 3.70E-05 | 1.41E-04 |
| ENSG00000144120 | TMEM177    | -1.40E+00 | 3.71E-05 | 1.42E-04 |
| ENSG00000169976 | SF3B5      | -1.46E+00 | 3.79E-05 | 1.45E-04 |
| ENSG00000180228 | PRKRA      | -1.10E+00 | 3.87E-05 | 1.48E-04 |
| ENSG00000147123 | NDUFB11    | -1.39E+00 | 3.89E-05 | 1.48E-04 |
| ENSG00000129521 | EGLN3      | -3.00E+00 | 3.92E-05 | 1.50E-04 |
| ENSG00000213280 | AC090114.1 | -1.38E+00 | 3.96E-05 | 1.51E-04 |
| ENSG00000121851 | POLR3GL    | -1.37E+00 | 4.02E-05 | 1.53E-04 |
| ENSG00000121104 | FAM117A    | -1.95E+00 | 4.03E-05 | 1.53E-04 |
| ENSG00000157399 | ARSE       | -2.49E+00 | 4.04E-05 | 1.54E-04 |
| ENSG00000110536 | PTPMT1     | -1.66E+00 | 4.07E-05 | 1.55E-04 |
| ENSG00000070501 | POLB       | -1.03E+00 | 4.07E-05 | 1.55E-04 |
| ENSG00000183617 | MRPL54     | -1.47E+00 | 4.08E-05 | 1.55E-04 |
| ENSG00000263272 | AC004148.1 | -1.46E+00 | 4.15E-05 | 1.57E-04 |
| ENSG00000137959 | IFI44L     | -2.71E+00 | 4.22E-05 | 1.60E-04 |
| ENSG00000184903 | IMMP2L     | -3.33E+00 | 4.27E-05 | 1.62E-04 |
| ENSG00000218510 | LINC00339  | -1.17E+00 | 4.28E-05 | 1.62E-04 |
| ENSG00000188763 | FZD9       | -3.38E+00 | 4.35E-05 | 1.65E-04 |
| ENSG00000137941 | TTLL7      | -1.34E+00 | 4.55E-05 | 1.72E-04 |
| ENSG00000133937 | GSC        | -4.09E+00 | 4.59E-05 | 1.73E-04 |
| ENSG00000126351 | THRA       | -1.54E+00 | 4.61E-05 | 1.74E-04 |
| ENSG00000044446 | PHKA2      | -1.11E+00 | 4.67E-05 | 1.76E-04 |
| ENSG00000170689 | HOXB9      | -1.44E+00 | 4.68E-05 | 1.76E-04 |
| ENSG00000130844 | ZNF331     | -1.04E+00 | 4.71E-05 | 1.77E-04 |
| ENSG00000107719 | PALD1      | -2.11E+00 | 4.77E-05 | 1.80E-04 |
| ENSG00000248275 | TRIM52-AS1 | -1.58E+00 | 4.85E-05 | 1.82E-04 |
| ENSG00000137944 | KYAT3      | -1.50E+00 | 4.90E-05 | 1.84E-04 |
| ENSG00000146677 | AC004453.1 | -1.46E+00 | 5.07E-05 | 1.90E-04 |
| ENSG00000173221 | GLRX       | -1.47E+00 | 5.14E-05 | 1.92E-04 |
| ENSG00000128185 | DGCR6L     | -1.26E+00 | 5.19E-05 | 1.94E-04 |
| ENSG00000113273 | ARSB       | -1.04E+00 | 5.27E-05 | 1.97E-04 |
| ENSG00000102984 | ZNF821     | -1.48E+00 | 5.33E-05 | 1.99E-04 |
| ENSG00000168758 | SEMA4C     | -1.17E+00 | 5.35E-05 | 2.00E-04 |
| ENSG00000215417 | MIR17HG    | -3.62E+00 | 5.39E-05 | 2.01E-04 |
| ENSG00000109738 | GLRB       | -1.92E+00 | 5.40E-05 | 2.01E-04 |
| ENSG00000233927 | RPS28      | -1.30E+00 | 5.43E-05 | 2.02E-04 |
| ENSG00000196323 | ZBTB44     | -1.03E+00 | 5.45E-05 | 2.03E-04 |
| ENSG00000196793 | ZNF239     | -3.78E+00 | 5.49E-05 | 2.04E-04 |
| ENSG00000100162 | CENPM      | -1.14E+00 | 5.63E-05 | 2.09E-04 |
| ENSG00000248927 | AC114284.1 | -4.60E+00 | 5.72E-05 | 2.12E-04 |

|                 |             |           |          |          |
|-----------------|-------------|-----------|----------|----------|
| ENSG00000243147 | MRPL33      | -1.11E+00 | 5.81E-05 | 2.15E-04 |
| ENSG0000038295  | TLL1        | -2.44E+00 | 5.87E-05 | 2.17E-04 |
| ENSG0000005073  | HOXA11      | -2.73E+00 | 5.99E-05 | 2.22E-04 |
| ENSG00000189298 | ZKSCAN3     | -1.85E+00 | 6.05E-05 | 2.23E-04 |
| ENSG00000271503 | CCL5        | -4.57E+00 | 6.12E-05 | 2.26E-04 |
| ENSG00000149503 | INCENP      | -1.25E+00 | 6.19E-05 | 2.28E-04 |
| ENSG00000141576 | RNF157      | -1.79E+00 | 6.25E-05 | 2.30E-04 |
| ENSG0000004139  | SARM1       | -1.04E+00 | 6.27E-05 | 2.31E-04 |
| ENSG00000135776 | ABCB10      | -1.06E+00 | 6.39E-05 | 2.35E-04 |
| ENSG00000173540 | GMPPB       | -1.03E+00 | 6.57E-05 | 2.42E-04 |
| ENSG00000164056 | SPRY1       | -2.17E+00 | 6.64E-05 | 2.44E-04 |
| ENSG00000111670 | GNPTAB      | -1.17E+00 | 6.67E-05 | 2.45E-04 |
| ENSG00000197646 | PDCD1LG2    | -3.03E+00 | 6.79E-05 | 2.49E-04 |
| ENSG00000112159 | MDN1        | -1.12E+00 | 7.14E-05 | 2.61E-04 |
| ENSG00000151388 | ADAMTS12    | -1.00E+00 | 7.15E-05 | 2.61E-04 |
| ENSG00000244165 | P2RY11      | -1.16E+00 | 7.15E-05 | 2.62E-04 |
| ENSG00000158966 | CACHD1      | -1.77E+00 | 7.23E-05 | 2.64E-04 |
| ENSG00000167528 | ZNF641      | -3.19E+00 | 7.23E-05 | 2.64E-04 |
| ENSG00000008277 | ADAM22      | -2.58E+00 | 7.32E-05 | 2.67E-04 |
| ENSG00000219928 | AL161787.1  | -2.69E+00 | 7.37E-05 | 2.69E-04 |
| ENSG00000268895 | A1BG-AS1    | -1.79E+00 | 7.53E-05 | 2.74E-04 |
| ENSG00000127311 | HELB        | -2.23E+00 | 7.63E-05 | 2.77E-04 |
| ENSG00000178498 | DTX3        | -1.56E+00 | 7.63E-05 | 2.77E-04 |
| ENSG00000171843 | MLLT3       | -1.21E+00 | 7.71E-05 | 2.80E-04 |
| ENSG00000166831 | RBPMS2      | -1.19E+00 | 7.75E-05 | 2.82E-04 |
| ENSG00000156509 | FBXO43      | -2.36E+00 | 7.88E-05 | 2.86E-04 |
| ENSG00000126243 | LRFN3       | -2.28E+00 | 7.92E-05 | 2.87E-04 |
| ENSG00000198429 | ZNF69       | -4.18E+00 | 7.93E-05 | 2.87E-04 |
| ENSG00000125246 | CLYBL       | -3.68E+00 | 7.95E-05 | 2.88E-04 |
| ENSG00000280744 | LINC01173   | -5.08E+00 | 8.02E-05 | 2.90E-04 |
| ENSG00000119711 | ALDH6A1     | -1.36E+00 | 8.02E-05 | 2.90E-04 |
| ENSG00000166173 | LARP6       | -1.14E+00 | 8.07E-05 | 2.92E-04 |
| ENSG00000234171 | RNASEH1-AS1 | -1.56E+00 | 8.12E-05 | 2.93E-04 |
| ENSG00000119699 | TGFB3       | -1.29E+00 | 8.13E-05 | 2.93E-04 |
| ENSG00000129946 | SHC2        | -1.70E+00 | 8.20E-05 | 2.96E-04 |
| ENSG00000182013 | PNMA8A      | -1.26E+00 | 8.21E-05 | 2.96E-04 |
| ENSG00000150995 | ITPR1       | -1.82E+00 | 8.24E-05 | 2.97E-04 |
| ENSG00000128626 | MRPS12      | -1.11E+00 | 8.29E-05 | 2.98E-04 |
| ENSG00000175054 | ATR         | -1.28E+00 | 8.29E-05 | 2.98E-04 |
| ENSG00000214357 | NEURL1B     | -1.66E+00 | 8.37E-05 | 3.01E-04 |

|                 |            |           |          |          |
|-----------------|------------|-----------|----------|----------|
| ENSG00000151917 | BEND6      | -1.71E+00 | 8.49E-05 | 3.05E-04 |
| ENSG00000108387 | SEPTIN4    | -1.41E+00 | 8.64E-05 | 3.10E-04 |
| ENSG00000167283 | ATP5MG     | -1.35E+00 | 8.65E-05 | 3.10E-04 |
| ENSG00000132423 | COQ3       | -1.09E+00 | 8.72E-05 | 3.13E-04 |
| ENSG00000253982 | AC100810.1 | -1.57E+00 | 8.78E-05 | 3.15E-04 |
| ENSG00000123080 | CDKN2C     | -1.07E+00 | 8.79E-05 | 3.15E-04 |
| ENSG00000105136 | ZNF419     | -1.19E+00 | 8.87E-05 | 3.18E-04 |
| ENSG00000214226 | C17orf67   | -1.96E+00 | 8.88E-05 | 3.18E-04 |
| ENSG00000133597 | ADCK2      | -1.18E+00 | 8.93E-05 | 3.19E-04 |
| ENSG00000065325 | GLP2R      | -3.61E+00 | 8.98E-05 | 3.21E-04 |
| ENSG00000147862 | NFIB       | -1.10E+00 | 8.99E-05 | 3.21E-04 |
| ENSG00000133107 | TRPC4      | -1.22E+00 | 9.23E-05 | 3.29E-04 |
| ENSG00000165288 | BRWD3      | -1.16E+00 | 9.26E-05 | 3.30E-04 |
| ENSG00000111913 | RIPOR2     | -2.20E+00 | 9.27E-05 | 3.31E-04 |
| ENSG00000186666 | BCDIN3D    | -1.59E+00 | 9.30E-05 | 3.31E-04 |
| ENSG00000159884 | CCDC107    | -1.49E+00 | 9.34E-05 | 3.33E-04 |
| ENSG00000203778 | FAM229B    | -1.49E+00 | 9.50E-05 | 3.38E-04 |
| ENSG00000123609 | NMI        | -1.11E+00 | 9.66E-05 | 3.44E-04 |
| ENSG00000115970 | THADA      | -1.12E+00 | 9.83E-05 | 3.49E-04 |
| ENSG00000124279 | FASTKD3    | -1.21E+00 | 9.90E-05 | 3.51E-04 |
| ENSG00000173915 | ATP5MD     | -1.31E+00 | 9.99E-05 | 3.54E-04 |
| ENSG00000117791 | MARC2      | -4.11E+00 | 1.00E-04 | 3.56E-04 |
| ENSG00000177954 | RPS27      | -1.25E+00 | 1.00E-04 | 3.56E-04 |
| ENSG00000176907 | TCIM       | -3.95E+00 | 1.00E-04 | 3.56E-04 |
| ENSG00000089091 | DZANK1     | -1.11E+00 | 1.01E-04 | 3.58E-04 |
| ENSG00000125965 | GDF5       | -2.99E+00 | 1.04E-04 | 3.67E-04 |
| ENSG00000106415 | GLCC11     | -1.76E+00 | 1.04E-04 | 3.68E-04 |
| ENSG00000171103 | TRMT61B    | -1.28E+00 | 1.06E-04 | 3.73E-04 |
| ENSG00000205133 | TRIQQ      | -1.31E+00 | 1.06E-04 | 3.75E-04 |
| ENSG00000228630 | HOTAIR     | -1.81E+00 | 1.08E-04 | 3.81E-04 |
| ENSG00000259953 | AL138756.1 | -2.05E+00 | 1.08E-04 | 3.81E-04 |
| ENSG00000197444 | OGDHL      | -1.95E+00 | 1.10E-04 | 3.88E-04 |
| ENSG00000100865 | CINP       | -1.05E+00 | 1.11E-04 | 3.90E-04 |
| ENSG00000080823 | MOK        | -1.16E+00 | 1.11E-04 | 3.91E-04 |
| ENSG00000175279 | CENPS      | -1.04E+00 | 1.14E-04 | 4.02E-04 |
| ENSG00000233117 | LINC00702  | -2.87E+00 | 1.15E-04 | 4.02E-04 |
| ENSG00000229994 | RPL5P4     | -1.25E+00 | 1.19E-04 | 4.16E-04 |
| ENSG00000198056 | PRIM1      | -1.09E+00 | 1.19E-04 | 4.16E-04 |
| ENSG00000155760 | FZD7       | -1.01E+00 | 1.19E-04 | 4.18E-04 |
| ENSG00000126458 | RRAS       | -1.10E+00 | 1.21E-04 | 4.22E-04 |

|                 |            |           |          |          |
|-----------------|------------|-----------|----------|----------|
| ENSG00000160207 | HSF2BP     | -1.73E+00 | 1.22E-04 | 4.26E-04 |
| ENSG00000132768 | DPH2       | -1.46E+00 | 1.23E-04 | 4.30E-04 |
| ENSG00000179943 | FIZ1       | -1.13E+00 | 1.24E-04 | 4.32E-04 |
| ENSG00000235453 | SMIM27     | -1.76E+00 | 1.24E-04 | 4.33E-04 |
| ENSG00000198624 | CCDC69     | -1.98E+00 | 1.25E-04 | 4.36E-04 |
| ENSG00000233836 | AC139769.1 | -2.93E+00 | 1.27E-04 | 4.43E-04 |
| ENSG00000164647 | STEAP1     | -1.87E+00 | 1.35E-04 | 4.69E-04 |
| ENSG00000197951 | ZNF71      | -1.29E+00 | 1.36E-04 | 4.70E-04 |
| ENSG00000167925 | GHDC       | -1.80E+00 | 1.36E-04 | 4.71E-04 |
| ENSG00000163050 | COQ8A      | -1.06E+00 | 1.37E-04 | 4.75E-04 |
| ENSG00000284783 | AC091057.4 | -3.24E+00 | 1.38E-04 | 4.78E-04 |
| ENSG00000145375 | SPATA5     | -1.12E+00 | 1.40E-04 | 4.85E-04 |
| ENSG00000145982 | FARS2      | -1.07E+00 | 1.40E-04 | 4.85E-04 |
| ENSG00000224063 | AC007319.1 | -2.78E+00 | 1.40E-04 | 4.85E-04 |
| ENSG00000278535 | DHRS11     | -1.48E+00 | 1.42E-04 | 4.91E-04 |
| ENSG00000100908 | EMC9       | -1.04E+00 | 1.43E-04 | 4.94E-04 |
| ENSG00000227081 | AC005912.1 | -1.33E+00 | 1.45E-04 | 4.98E-04 |
| ENSG00000120658 | ENOX1      | -1.70E+00 | 1.45E-04 | 4.99E-04 |
| ENSG00000181817 | LSM10      | -1.16E+00 | 1.47E-04 | 5.06E-04 |
| ENSG00000166261 | ZNF202     | -1.02E+00 | 1.48E-04 | 5.09E-04 |
| ENSG00000237943 | PRKCQ-AS1  | -1.73E+00 | 1.49E-04 | 5.12E-04 |
| ENSG00000199753 | SNORD104   | -1.47E+00 | 1.54E-04 | 5.27E-04 |
| ENSG00000223749 | MIR503HG   | -1.80E+00 | 1.55E-04 | 5.33E-04 |
| ENSG00000138686 | BBS7       | -1.00E+00 | 1.56E-04 | 5.34E-04 |
| ENSG00000138738 | PRDM5      | -1.84E+00 | 1.56E-04 | 5.34E-04 |
| ENSG00000254510 | AP001107.5 | -2.80E+00 | 1.57E-04 | 5.39E-04 |
| ENSG00000175445 | LPL        | -1.05E+00 | 1.59E-04 | 5.46E-04 |
| ENSG00000130158 | DOCK6      | -1.18E+00 | 1.65E-04 | 5.64E-04 |
| ENSG00000078098 | FAP        | -4.28E+00 | 1.69E-04 | 5.78E-04 |
| ENSG00000196381 | ZNF781     | -4.33E+00 | 1.72E-04 | 5.87E-04 |
| ENSG00000136149 | RPL13AP25  | -1.17E+00 | 1.74E-04 | 5.93E-04 |
| ENSG00000170458 | CD14       | -1.94E+00 | 1.75E-04 | 5.97E-04 |
| ENSG00000115350 | POLE4      | -1.22E+00 | 1.75E-04 | 5.97E-04 |
| ENSG00000164929 | BAALC      | -2.91E+00 | 1.83E-04 | 6.21E-04 |
| ENSG00000141391 | PRELID3A   | -1.99E+00 | 1.85E-04 | 6.28E-04 |
| ENSG00000088727 | KIF9       | -1.16E+00 | 1.86E-04 | 6.30E-04 |
| ENSG00000163170 | BOLA3      | -1.11E+00 | 1.86E-04 | 6.31E-04 |
| ENSG00000164066 | INTU       | -1.15E+00 | 1.87E-04 | 6.35E-04 |
| ENSG00000174705 | SH3PXD2B   | -1.36E+00 | 1.88E-04 | 6.36E-04 |
| ENSG00000124459 | ZNF45      | -1.37E+00 | 1.89E-04 | 6.40E-04 |

|                 |            |           |          |          |
|-----------------|------------|-----------|----------|----------|
| ENSG00000233954 | UQCRHL     | -1.40E+00 | 1.90E-04 | 6.42E-04 |
| ENSG00000132330 | SCLY       | -1.68E+00 | 1.91E-04 | 6.46E-04 |
| ENSG00000067840 | PDZD4      | -1.01E+00 | 1.92E-04 | 6.49E-04 |
| ENSG00000140600 | SH3GL3     | -2.24E+00 | 1.93E-04 | 6.51E-04 |
| ENSG00000150667 | FSIP1      | -1.65E+00 | 1.94E-04 | 6.54E-04 |
| ENSG00000160993 | ALKBH4     | -1.15E+00 | 1.98E-04 | 6.67E-04 |
| ENSG00000253958 | CLDN23     | -2.25E+00 | 1.99E-04 | 6.70E-04 |
| ENSG00000127124 | HIVEP3     | -1.02E+00 | 2.07E-04 | 6.94E-04 |
| ENSG00000170430 | MGMT       | -2.11E+00 | 2.08E-04 | 6.96E-04 |
| ENSG00000267152 | AC093227.1 | -2.91E+00 | 2.08E-04 | 6.97E-04 |
| ENSG00000171858 | RPS21      | -1.42E+00 | 2.11E-04 | 7.07E-04 |
| ENSG00000241127 | YAE1       | -1.05E+00 | 2.13E-04 | 7.12E-04 |
| ENSG00000137752 | CASP1      | -2.62E+00 | 2.13E-04 | 7.13E-04 |
| ENSG00000096654 | ZNF184     | -1.16E+00 | 2.13E-04 | 7.13E-04 |
| ENSG00000174917 | MICOS13    | -1.52E+00 | 2.14E-04 | 7.16E-04 |
| ENSG00000225200 | AC246787.1 | -1.29E+00 | 2.19E-04 | 7.33E-04 |
| ENSG00000172167 | MTBP       | -1.15E+00 | 2.19E-04 | 7.33E-04 |
| ENSG00000203930 | LINC00632  | -1.65E+00 | 2.23E-04 | 7.43E-04 |
| ENSG00000174871 | CNIH2      | -1.67E+00 | 2.24E-04 | 7.45E-04 |
| ENSG00000279673 | AC092919.2 | -4.50E+00 | 2.26E-04 | 7.54E-04 |
| ENSG00000271590 | AC108463.3 | -1.80E+00 | 2.34E-04 | 7.77E-04 |
| ENSG00000151617 | EDNRA      | -4.04E+00 | 2.34E-04 | 7.78E-04 |
| ENSG00000147912 | FBXO10     | -1.55E+00 | 2.35E-04 | 7.80E-04 |
| ENSG00000074935 | TUBE1      | -1.27E+00 | 2.36E-04 | 7.84E-04 |
| ENSG00000205559 | CHKB-DT    | -1.63E+00 | 2.40E-04 | 7.96E-04 |
| ENSG00000079215 | SLC1A3     | -2.70E+00 | 2.41E-04 | 7.97E-04 |
| ENSG00000146414 | SHPRH      | -1.06E+00 | 2.41E-04 | 7.98E-04 |
| ENSG00000170390 | DCLK2      | -1.85E+00 | 2.41E-04 | 8.00E-04 |
| ENSG00000226781 | TBCAP1     | -6.03E+00 | 2.44E-04 | 8.07E-04 |
| ENSG00000250634 | LINC01182  | -3.19E+00 | 2.50E-04 | 8.27E-04 |
| ENSG00000166770 | ZNF667-AS1 | -1.19E+00 | 2.50E-04 | 8.27E-04 |
| ENSG00000184635 | ZNF93      | -1.03E+00 | 2.54E-04 | 8.38E-04 |
| ENSG00000226314 | ZNF192P1   | -3.10E+00 | 2.61E-04 | 8.59E-04 |
| ENSG00000226985 | LINC01203  | -4.77E+00 | 2.65E-04 | 8.73E-04 |
| ENSG00000163449 | TMEM169    | -3.46E+00 | 2.71E-04 | 8.90E-04 |
| ENSG00000119227 | PIGZ       | -3.39E+00 | 2.72E-04 | 8.93E-04 |
| ENSG00000102904 | TSNAXIP1   | -2.91E+00 | 2.72E-04 | 8.94E-04 |
| ENSG00000279369 | AC046185.3 | -2.42E+00 | 2.74E-04 | 9.00E-04 |
| ENSG00000214944 | ARHGEF28   | -1.29E+00 | 2.77E-04 | 9.09E-04 |
| ENSG00000197763 | TXNRD3     | -1.81E+00 | 2.82E-04 | 9.23E-04 |

|                 |            |           |          |          |
|-----------------|------------|-----------|----------|----------|
| ENSG00000165185 | KIAA1958   | -1.23E+00 | 2.82E-04 | 9.24E-04 |
| ENSG00000163040 | CCDC74A    | -1.91E+00 | 2.83E-04 | 9.26E-04 |
| ENSG00000218175 | AC016739.1 | -1.66E+00 | 2.88E-04 | 9.43E-04 |
| ENSG00000168234 | TTC39C     | -1.08E+00 | 2.91E-04 | 9.49E-04 |
| ENSG00000105889 | STEAP1B    | -2.92E+00 | 2.92E-04 | 9.53E-04 |
| ENSG00000001084 | GCLC       | -1.01E+00 | 2.94E-04 | 9.58E-04 |
| ENSG00000244586 | WNT5A-AS1  | -4.49E+00 | 2.97E-04 | 9.67E-04 |
| ENSG00000123739 | PLA2G12A   | -1.26E+00 | 3.02E-04 | 9.85E-04 |
| ENSG00000150764 | DIXDC1     | -1.17E+00 | 3.09E-04 | 1.00E-03 |
| ENSG00000277806 | AC006213.4 | -2.79E+00 | 3.28E-04 | 1.06E-03 |
| ENSG00000136371 | MTHFS      | -1.51E+00 | 3.37E-04 | 1.09E-03 |
| ENSG00000255857 | PXN-AS1    | -1.63E+00 | 3.38E-04 | 1.09E-03 |
| ENSG00000153107 | ANAPC1     | -1.08E+00 | 3.44E-04 | 1.11E-03 |
| ENSG00000234779 | BNC2-AS1   | -3.41E+00 | 3.48E-04 | 1.12E-03 |
| ENSG00000223865 | HLA-DPB1   | -1.08E+00 | 3.48E-04 | 1.12E-03 |
| ENSG00000168237 | GLYCTK     | -1.43E+00 | 3.54E-04 | 1.14E-03 |
| ENSG00000197056 | ZMYM1      | -1.26E+00 | 3.53E-04 | 1.14E-03 |
| ENSG00000171462 | DLK2       | -1.30E+00 | 3.54E-04 | 1.14E-03 |
| ENSG00000136010 | ALDH1L2    | -1.44E+00 | 3.59E-04 | 1.15E-03 |
| ENSG00000170917 | NUDT6      | -1.44E+00 | 3.65E-04 | 1.17E-03 |
| ENSG00000227372 | TP73-AS1   | -1.22E+00 | 3.65E-04 | 1.17E-03 |
| ENSG00000197782 | ZNF780A    | -1.41E+00 | 3.70E-04 | 1.18E-03 |
| ENSG00000234883 | MIR155HG   | -2.26E+00 | 3.74E-04 | 1.20E-03 |
| ENSG00000163322 | ABRAXAS1   | -1.30E+00 | 3.79E-04 | 1.21E-03 |
| ENSG00000170889 | RPS9       | -1.31E+00 | 3.82E-04 | 1.22E-03 |
| ENSG00000170417 | TMEM182    | -2.58E+00 | 3.83E-04 | 1.22E-03 |
| ENSG00000140398 | NEIL1      | -4.50E+00 | 3.83E-04 | 1.22E-03 |
| ENSG00000132530 | XAF1       | -2.74E+00 | 3.88E-04 | 1.24E-03 |
| ENSG00000152495 | CAMK4      | -1.56E+00 | 3.97E-04 | 1.26E-03 |
| ENSG00000279191 | AC068491.4 | -1.61E+00 | 3.97E-04 | 1.26E-03 |
| ENSG00000212802 | RPL15P3    | -1.14E+00 | 3.98E-04 | 1.27E-03 |
| ENSG00000267041 | ZNF850     | -1.55E+00 | 3.98E-04 | 1.27E-03 |
| ENSG00000227906 | SNAP25-AS1 | -4.35E+00 | 4.01E-04 | 1.27E-03 |
| ENSG00000185340 | GAS2L1     | -1.14E+00 | 4.07E-04 | 1.29E-03 |
| ENSG00000151468 | CCDC3      | -1.44E+00 | 4.10E-04 | 1.30E-03 |
| ENSG00000144857 | BOC        | -1.35E+00 | 4.18E-04 | 1.33E-03 |
| ENSG00000092036 | HAUS4      | -2.15E+00 | 4.21E-04 | 1.33E-03 |
| ENSG00000175395 | ZNF25      | -2.28E+00 | 4.25E-04 | 1.35E-03 |
| ENSG00000223485 | LINC01615  | -1.69E+00 | 4.26E-04 | 1.35E-03 |
| ENSG00000132031 | MATN3      | -1.80E+00 | 4.35E-04 | 1.37E-03 |

|                 |             |           |          |          |
|-----------------|-------------|-----------|----------|----------|
| ENSG00000178026 | LRRRC75B    | -2.10E+00 | 4.43E-04 | 1.40E-03 |
| ENSG00000267508 | ZNF285      | -2.03E+00 | 4.44E-04 | 1.40E-03 |
| ENSG00000260442 | ATP2A1-AS1  | -1.37E+00 | 4.45E-04 | 1.40E-03 |
| ENSG00000186625 | KATNA1      | -1.03E+00 | 4.47E-04 | 1.41E-03 |
| ENSG00000148680 | HTR7        | -1.79E+00 | 4.56E-04 | 1.43E-03 |
| ENSG00000198874 | TYW1        | -1.03E+00 | 4.69E-04 | 1.47E-03 |
| ENSG00000204052 | LRRRC73     | -2.42E+00 | 4.74E-04 | 1.48E-03 |
| ENSG00000230615 | AL139220.2  | -2.56E+00 | 4.76E-04 | 1.49E-03 |
| ENSG00000179542 | SLITRK4     | -2.66E+00 | 4.76E-04 | 1.49E-03 |
| ENSG00000061918 | GUCY1B1     | -2.69E+00 | 4.79E-04 | 1.50E-03 |
| ENSG00000166321 | NUDT13      | -2.38E+00 | 4.79E-04 | 1.50E-03 |
| ENSG00000175573 | C11orf68    | -1.15E+00 | 4.79E-04 | 1.50E-03 |
| ENSG00000167550 | RHEBL1      | -1.76E+00 | 4.82E-04 | 1.51E-03 |
| ENSG00000226419 | SLC16A1-AS1 | -1.08E+00 | 4.84E-04 | 1.51E-03 |
| ENSG00000168386 | FILIP1L     | -1.09E+00 | 4.87E-04 | 1.52E-03 |
| ENSG00000204271 | SPIN3       | -1.65E+00 | 4.95E-04 | 1.54E-03 |
| ENSG00000269837 | IPO5P1      | -2.21E+00 | 4.96E-04 | 1.54E-03 |
| ENSG00000088881 | EBF4        | -1.88E+00 | 5.01E-04 | 1.56E-03 |
| ENSG00000159958 | TNFRSF13C   | -3.61E+00 | 5.12E-04 | 1.59E-03 |
| ENSG00000250786 | SNHG18      | -1.39E+00 | 5.13E-04 | 1.59E-03 |
| ENSG00000141295 | SCRN2       | -1.26E+00 | 5.14E-04 | 1.60E-03 |
| ENSG00000287097 | AL590550.1  | -4.15E+00 | 5.19E-04 | 1.61E-03 |
| ENSG00000169855 | ROBO1       | -1.35E+00 | 5.40E-04 | 1.67E-03 |
| ENSG00000235363 | SNRPGP10    | -2.26E+00 | 5.45E-04 | 1.68E-03 |
| ENSG00000185442 | FAM174B     | -2.27E+00 | 5.53E-04 | 1.71E-03 |
| ENSG00000205707 | ETFRF1      | -1.08E+00 | 5.58E-04 | 1.72E-03 |
| ENSG00000140848 | CPNE2       | -1.02E+00 | 5.71E-04 | 1.76E-03 |
| ENSG00000266967 | AARSD1      | -2.42E+00 | 5.78E-04 | 1.78E-03 |
| ENSG00000133863 | TEX15       | -2.16E+00 | 5.78E-04 | 1.78E-03 |
| ENSG00000102048 | ASB9        | -3.71E+00 | 5.88E-04 | 1.81E-03 |
| ENSG00000150779 | TIMM8B      | -1.14E+00 | 5.89E-04 | 1.81E-03 |
| ENSG00000120217 | CD274       | -1.93E+00 | 5.89E-04 | 1.81E-03 |
| ENSG00000139428 | MMAB        | -1.01E+00 | 5.91E-04 | 1.82E-03 |
| ENSG00000219481 | NBPF1       | -1.10E+00 | 5.99E-04 | 1.84E-03 |
| ENSG00000248487 | ABHD14A     | -1.13E+00 | 6.07E-04 | 1.86E-03 |
| ENSG00000116117 | PARD3B      | -3.48E+00 | 6.11E-04 | 1.87E-03 |
| ENSG00000178096 | BOLA1       | -1.84E+00 | 6.12E-04 | 1.87E-03 |
| ENSG00000176371 | ZSCAN2      | -1.56E+00 | 6.13E-04 | 1.88E-03 |
| ENSG00000134297 | PLEKHA8P1   | -2.33E+00 | 6.22E-04 | 1.90E-03 |
| ENSG00000079263 | SP140       | -3.75E+00 | 6.26E-04 | 1.91E-03 |

|                 |            |           |          |          |
|-----------------|------------|-----------|----------|----------|
| ENSG00000169499 | PLEKHA2    | -1.06E+00 | 6.26E-04 | 1.91E-03 |
| ENSG00000123689 | G0S2       | -2.93E+00 | 6.30E-04 | 1.92E-03 |
| ENSG00000100147 | CCDC134    | -1.85E+00 | 6.35E-04 | 1.94E-03 |
| ENSG00000169020 | ATP5ME     | -1.18E+00 | 6.52E-04 | 1.98E-03 |
| ENSG00000184785 | SMIM10     | -1.93E+00 | 6.53E-04 | 1.99E-03 |
| ENSG00000023445 | BIRC3      | -1.18E+00 | 6.59E-04 | 2.00E-03 |
| ENSG00000107614 | TRDMT1     | -1.53E+00 | 6.62E-04 | 2.01E-03 |
| ENSG00000104177 | MYEF2      | -2.20E+00 | 6.63E-04 | 2.01E-03 |
| ENSG00000279170 | TSTD3      | -1.22E+00 | 6.65E-04 | 2.02E-03 |
| ENSG00000103021 | CCDC113    | -2.20E+00 | 6.66E-04 | 2.02E-03 |
| ENSG00000201998 | SNORA23    | -3.41E+00 | 6.69E-04 | 2.03E-03 |
| ENSG00000134330 | IAH1       | -1.36E+00 | 6.75E-04 | 2.05E-03 |
| ENSG00000157911 | PEX10      | -1.14E+00 | 6.77E-04 | 2.05E-03 |
| ENSG00000280721 | LINC01943  | -3.62E+00 | 6.87E-04 | 2.08E-03 |
| ENSG00000164949 | GEM        | -1.47E+00 | 6.99E-04 | 2.11E-03 |
| ENSG00000116852 | KIF21B     | -1.89E+00 | 7.04E-04 | 2.13E-03 |
| ENSG00000154736 | ADAMTS5    | -2.07E+00 | 7.05E-04 | 2.13E-03 |
| ENSG00000248008 | NRAV       | -1.30E+00 | 7.06E-04 | 2.13E-03 |
| ENSG00000199331 | Y_RNA      | -3.93E+00 | 7.36E-04 | 2.22E-03 |
| ENSG00000275713 | HIST1H2BH  | -2.00E+00 | 7.38E-04 | 2.22E-03 |
| ENSG00000232346 | Z74021.1   | -1.97E+00 | 7.41E-04 | 2.23E-03 |
| ENSG00000162745 | OLFML2B    | -2.12E+00 | 7.70E-04 | 2.31E-03 |
| ENSG00000196976 | LAGE3      | -1.10E+00 | 7.74E-04 | 2.32E-03 |
| ENSG00000135953 | MFSD9      | -1.15E+00 | 7.75E-04 | 2.32E-03 |
| ENSG00000126756 | UXT        | -1.02E+00 | 7.82E-04 | 2.34E-03 |
| ENSG00000183186 | C2CD4C     | -1.61E+00 | 7.90E-04 | 2.36E-03 |
| ENSG00000164849 | GPR146     | -1.60E+00 | 7.96E-04 | 2.38E-03 |
| ENSG00000143995 | MEIS1      | -1.85E+00 | 8.01E-04 | 2.39E-03 |
| ENSG00000260862 | AC099506.1 | -3.39E+00 | 8.05E-04 | 2.40E-03 |
| ENSG00000061337 | LZTS1      | -1.52E+00 | 8.17E-04 | 2.44E-03 |
| ENSG00000100711 | ZFYVE21    | -1.04E+00 | 8.24E-04 | 2.45E-03 |
| ENSG00000183605 | SFXN4      | -1.21E+00 | 8.27E-04 | 2.46E-03 |
| ENSG00000064763 | FAR2       | -1.41E+00 | 8.34E-04 | 2.48E-03 |
| ENSG00000197647 | ZNF433     | -1.41E+00 | 8.42E-04 | 2.50E-03 |
| ENSG00000162066 | AMDHD2     | -1.20E+00 | 8.46E-04 | 2.51E-03 |
| ENSG00000267102 | AC060766.1 | -2.57E+00 | 8.51E-04 | 2.53E-03 |
| ENSG00000203724 | C1orf53    | -2.01E+00 | 8.57E-04 | 2.54E-03 |
| ENSG00000051523 | CYBA       | -1.21E+00 | 8.78E-04 | 2.60E-03 |
| ENSG00000245248 | USP2-AS1   | -3.05E+00 | 8.83E-04 | 2.62E-03 |
| ENSG00000111348 | ARHGDI1B   | -2.60E+00 | 8.96E-04 | 2.65E-03 |



|                 |            |           |          |          |
|-----------------|------------|-----------|----------|----------|
| ENSG00000169429 | CXCL8      | -1.92E+00 | 9.24E-04 | 2.73E-03 |
| ENSG00000174576 | NPAS4      | -3.89E+00 | 9.24E-04 | 2.73E-03 |
| ENSG00000264350 | SNRPGP2    | -1.63E+00 | 9.35E-04 | 2.76E-03 |
| ENSG00000163734 | CXCL3      | -2.31E+00 | 9.38E-04 | 2.77E-03 |
| ENSG00000104324 | CPQ        | -1.40E+00 | 9.40E-04 | 2.77E-03 |
| ENSG00000145779 | TNFAIP8    | -1.04E+00 | 9.40E-04 | 2.77E-03 |
| ENSG00000161179 | YDJC       | -1.00E+00 | 9.45E-04 | 2.78E-03 |
| ENSG00000278709 | NKILA      | -1.97E+00 | 9.50E-04 | 2.80E-03 |
| ENSG00000113838 | TBCCD1     | -1.70E+00 | 9.53E-04 | 2.80E-03 |
| ENSG00000110446 | SLC15A3    | -1.61E+00 | 9.58E-04 | 2.82E-03 |
| ENSG00000161692 | DBF4B      | -1.38E+00 | 9.83E-04 | 2.89E-03 |
| ENSG00000242779 | ZNF702P    | -1.31E+00 | 9.86E-04 | 2.89E-03 |
| ENSG00000185730 | ZNF696     | -1.39E+00 | 9.93E-04 | 2.91E-03 |
| ENSG00000143951 | WDPCP      | -1.35E+00 | 1.01E-03 | 2.95E-03 |
| ENSG00000189227 | C15orf61   | -1.02E+00 | 1.01E-03 | 2.96E-03 |
| ENSG00000204301 | NOTCH4     | -1.68E+00 | 1.02E-03 | 3.00E-03 |
| ENSG00000157426 | AASDH      | -1.16E+00 | 1.06E-03 | 3.11E-03 |
| ENSG00000083535 | PIBF1      | -1.09E+00 | 1.06E-03 | 3.11E-03 |
| ENSG00000274605 | PCCA-DT    | -1.41E+00 | 1.07E-03 | 3.12E-03 |
| ENSG00000206535 | LNP1       | -1.71E+00 | 1.07E-03 | 3.13E-03 |
| ENSG00000179240 | GVQW3      | -2.23E+00 | 1.08E-03 | 3.16E-03 |
| ENSG00000274825 | AL023803.2 | -2.63E+00 | 1.09E-03 | 3.18E-03 |
| ENSG00000003989 | SLC7A2     | -1.23E+00 | 1.11E-03 | 3.23E-03 |
| ENSG00000158164 | TMSB15A    | -1.67E+00 | 1.13E-03 | 3.28E-03 |
| ENSG00000150540 | HNMT       | -1.41E+00 | 1.14E-03 | 3.32E-03 |
| ENSG00000134259 | NGF        | -1.58E+00 | 1.14E-03 | 3.32E-03 |
| ENSG00000213315 | AL122020.1 | -1.00E+00 | 1.15E-03 | 3.32E-03 |
| ENSG00000267060 | PTGES3L    | -2.88E+00 | 1.20E-03 | 3.48E-03 |
| ENSG00000134698 | AGO4       | -1.06E+00 | 1.22E-03 | 3.52E-03 |
| ENSG00000181619 | GPR135     | -1.90E+00 | 1.22E-03 | 3.53E-03 |
| ENSG00000266962 | AC067852.2 | -1.37E+00 | 1.23E-03 | 3.55E-03 |
| ENSG00000196456 | ZNF775     | -1.29E+00 | 1.23E-03 | 3.55E-03 |
| ENSG00000132967 | HMGB1P5    | -1.13E+00 | 1.23E-03 | 3.56E-03 |
| ENSG00000164418 | GRIK2      | -4.83E+00 | 1.25E-03 | 3.59E-03 |
| ENSG00000132122 | SPATA6     | -1.83E+00 | 1.26E-03 | 3.64E-03 |
| ENSG00000087903 | RFX2       | -1.24E+00 | 1.28E-03 | 3.67E-03 |
| ENSG00000276107 | AC037198.1 | -1.82E+00 | 1.28E-03 | 3.67E-03 |
| ENSG00000130005 | GAMT       | -1.01E+00 | 1.28E-03 | 3.67E-03 |
| ENSG00000160094 | ZNF362     | -1.26E+00 | 1.28E-03 | 3.68E-03 |
| ENSG00000261188 | Z95115.1   | -2.14E+00 | 1.29E-03 | 3.71E-03 |

|                 |            |           |          |          |
|-----------------|------------|-----------|----------|----------|
| ENSG00000173715 | C11orf80   | -2.69E+00 | 1.31E-03 | 3.75E-03 |
| ENSG00000143942 | CHAC2      | -1.28E+00 | 1.33E-03 | 3.82E-03 |
| ENSG00000267745 | AC060766.7 | -2.10E+00 | 1.35E-03 | 3.86E-03 |
| ENSG00000177352 | CCDC71     | -1.79E+00 | 1.36E-03 | 3.88E-03 |
| ENSG00000221886 | ZBED8      | -1.21E+00 | 1.36E-03 | 3.89E-03 |
| ENSG00000146776 | ATXN7L1    | -1.18E+00 | 1.39E-03 | 3.97E-03 |
| ENSG00000272870 | AC097534.2 | -1.63E+00 | 1.40E-03 | 4.00E-03 |
| ENSG00000081177 | EXD2       | -1.13E+00 | 1.45E-03 | 4.13E-03 |
| ENSG00000166823 | MESP1      | -1.49E+00 | 1.46E-03 | 4.14E-03 |
| ENSG00000079101 | CLUL1      | -4.34E+00 | 1.49E-03 | 4.23E-03 |
| ENSG00000132535 | DLG4       | -1.21E+00 | 1.51E-03 | 4.29E-03 |
| ENSG00000169371 | SNUPN      | -1.06E+00 | 1.52E-03 | 4.29E-03 |
| ENSG00000243943 | ZNF512     | -1.12E+00 | 1.52E-03 | 4.30E-03 |
| ENSG00000126106 | TMEM53     | -1.36E+00 | 1.54E-03 | 4.36E-03 |
| ENSG00000155636 | RBM45      | -1.14E+00 | 1.57E-03 | 4.41E-03 |
| ENSG00000152580 | IGSF10     | -3.14E+00 | 1.57E-03 | 4.43E-03 |
| ENSG00000275180 | AC048341.2 | -1.19E+00 | 1.62E-03 | 4.54E-03 |
| ENSG00000150281 | CTF1       | -4.30E+00 | 1.64E-03 | 4.61E-03 |
| ENSG00000134253 | TRIM45     | -2.04E+00 | 1.66E-03 | 4.67E-03 |
| ENSG00000164403 | SHROOM1    | -1.06E+00 | 1.67E-03 | 4.68E-03 |
| ENSG00000286873 | AC012306.3 | -3.19E+00 | 1.68E-03 | 4.72E-03 |
| ENSG00000159433 | STARD9     | -1.34E+00 | 1.69E-03 | 4.73E-03 |
| ENSG00000198947 | DMD        | -1.34E+00 | 1.74E-03 | 4.87E-03 |
| ENSG00000144843 | ADPRH      | -2.60E+00 | 1.74E-03 | 4.87E-03 |
| ENSG00000169570 | DTWD2      | -1.47E+00 | 1.75E-03 | 4.90E-03 |
| ENSG00000198556 | ZNF789     | -1.29E+00 | 1.77E-03 | 4.96E-03 |
| ENSG00000170522 | ELOVL6     | -1.33E+00 | 1.79E-03 | 4.99E-03 |
| ENSG00000072195 | SPEG       | -1.03E+00 | 1.86E-03 | 5.17E-03 |
| ENSG00000241756 | RN7SL83P   | -3.72E+00 | 1.90E-03 | 5.27E-03 |
| ENSG00000177854 | TMEM187    | -1.82E+00 | 1.91E-03 | 5.29E-03 |
| ENSG00000241942 | RPS20P20   | -3.69E+00 | 1.92E-03 | 5.33E-03 |
| ENSG00000196876 | SCN8A      | -1.02E+00 | 1.92E-03 | 5.33E-03 |
| ENSG00000285943 | AC112128.1 | -4.04E+00 | 1.93E-03 | 5.34E-03 |
| ENSG00000167912 | AC090152.1 | -3.83E+00 | 1.93E-03 | 5.35E-03 |
| ENSG00000135587 | SMPD2      | -1.09E+00 | 1.93E-03 | 5.35E-03 |
| ENSG00000175322 | ZNF519     | -1.14E+00 | 1.94E-03 | 5.37E-03 |
| ENSG00000142686 | C1orf216   | -1.70E+00 | 1.95E-03 | 5.39E-03 |
| ENSG00000062370 | ZNF112     | -1.37E+00 | 1.99E-03 | 5.49E-03 |
| ENSG00000102409 | BEX4       | -1.56E+00 | 1.99E-03 | 5.50E-03 |
| ENSG00000137720 | C11orf1    | -1.06E+00 | 2.04E-03 | 5.63E-03 |

|                 |            |           |          |          |
|-----------------|------------|-----------|----------|----------|
| ENSG00000244187 | TMEM141    | -1.30E+00 | 2.04E-03 | 5.63E-03 |
| ENSG00000234692 | AL355601.1 | -3.61E+00 | 2.12E-03 | 5.82E-03 |
| ENSG00000168273 | SMIM4      | -1.16E+00 | 2.16E-03 | 5.91E-03 |
| ENSG00000198890 | PRMT6      | -1.03E+00 | 2.16E-03 | 5.92E-03 |
| ENSG00000063587 | ZNF275     | -1.10E+00 | 2.17E-03 | 5.96E-03 |
| ENSG00000254337 | AC083967.1 | -3.96E+00 | 2.23E-03 | 6.11E-03 |
| ENSG00000241852 | C8orf58    | -1.07E+00 | 2.24E-03 | 6.13E-03 |
| ENSG00000120832 | MTERF2     | -1.21E+00 | 2.26E-03 | 6.18E-03 |
| ENSG00000091844 | RGS17      | -1.62E+00 | 2.28E-03 | 6.23E-03 |
| ENSG00000049883 | PTCD2      | -1.08E+00 | 2.29E-03 | 6.27E-03 |
| ENSG00000120093 | HOXB3      | -1.00E+00 | 2.31E-03 | 6.30E-03 |
| ENSG00000137142 | IGFBPL1    | -1.79E+00 | 2.31E-03 | 6.30E-03 |
| ENSG00000202337 | RNU6-8     | -2.74E+00 | 2.38E-03 | 6.48E-03 |
| ENSG00000152926 | ZNF117     | -1.56E+00 | 2.40E-03 | 6.54E-03 |
| ENSG00000260136 | AC008915.2 | -1.48E+00 | 2.42E-03 | 6.58E-03 |
| ENSG00000264107 | AC138207.2 | -2.22E+00 | 2.49E-03 | 6.76E-03 |
| ENSG00000143786 | CNIH3      | -2.62E+00 | 2.52E-03 | 6.83E-03 |
| ENSG00000250222 | AC008443.5 | -2.49E+00 | 2.53E-03 | 6.86E-03 |
| ENSG00000247081 | BAALC-AS1  | -1.67E+00 | 2.56E-03 | 6.92E-03 |
| ENSG00000261575 | AC005829.1 | -2.83E+00 | 2.60E-03 | 7.02E-03 |
| ENSG00000162757 | C1orf74    | -1.19E+00 | 2.60E-03 | 7.02E-03 |
| ENSG00000153790 | C7orf31    | -2.07E+00 | 2.62E-03 | 7.07E-03 |
| ENSG00000204291 | COL15A1    | -1.23E+00 | 2.62E-03 | 7.08E-03 |
| ENSG00000062822 | POLD1      | -1.15E+00 | 2.65E-03 | 7.15E-03 |
| ENSG00000227462 | PSME2P6    | -1.25E+00 | 2.66E-03 | 7.18E-03 |
| ENSG00000149582 | TMEM25     | -1.62E+00 | 2.67E-03 | 7.20E-03 |
| ENSG00000259659 | AC009996.1 | -3.18E+00 | 2.68E-03 | 7.21E-03 |
| ENSG00000159885 | ZNF222     | -1.32E+00 | 2.70E-03 | 7.27E-03 |
| ENSG00000249306 | LINC01411  | -2.21E+00 | 2.74E-03 | 7.38E-03 |
| ENSG00000128039 | SRD5A3     | -1.31E+00 | 2.77E-03 | 7.44E-03 |
| ENSG00000266709 | AC005224.3 | -1.60E+00 | 2.81E-03 | 7.54E-03 |
| ENSG00000213442 | RPL18AP3   | -1.43E+00 | 2.81E-03 | 7.54E-03 |
| ENSG00000186615 | KTN1-AS1   | -2.01E+00 | 2.83E-03 | 7.59E-03 |
| ENSG00000235919 | ASH1L-AS1  | -1.86E+00 | 2.84E-03 | 7.61E-03 |
| ENSG00000163590 | PPM1L      | -1.11E+00 | 2.94E-03 | 7.85E-03 |
| ENSG00000278126 | AC139768.1 | -1.70E+00 | 3.03E-03 | 8.07E-03 |
| ENSG00000166529 | ZSCAN21    | -1.62E+00 | 3.08E-03 | 8.18E-03 |
| ENSG00000105514 | RAB3D      | -1.18E+00 | 3.10E-03 | 8.24E-03 |
| ENSG00000187955 | COL14A1    | -2.89E+00 | 3.13E-03 | 8.31E-03 |
| ENSG00000166821 | PEX11A     | -1.10E+00 | 3.16E-03 | 8.38E-03 |

|                 |            |           |          |          |
|-----------------|------------|-----------|----------|----------|
| ENSG00000275464 | FP565260.1 | -1.39E+00 | 3.17E-03 | 8.40E-03 |
| ENSG00000238390 | AP000254.1 | -2.09E+00 | 3.21E-03 | 8.49E-03 |
| ENSG00000267890 | AC010624.2 | -3.53E+00 | 3.22E-03 | 8.51E-03 |
| ENSG00000146950 | SHROOM2    | -1.33E+00 | 3.24E-03 | 8.56E-03 |
| ENSG00000163462 | TRIM46     | -2.01E+00 | 3.26E-03 | 8.61E-03 |
| ENSG00000125995 | ROMO1      | -1.03E+00 | 3.27E-03 | 8.63E-03 |
| ENSG00000250091 | DNAH10OS   | -3.47E+00 | 3.32E-03 | 8.75E-03 |
| ENSG00000166707 | ZCCHC18    | -2.93E+00 | 3.35E-03 | 8.81E-03 |
| ENSG00000148655 | LRMDA      | -2.19E+00 | 3.35E-03 | 8.83E-03 |
| ENSG00000183668 | PSG9       | -4.17E+00 | 3.37E-03 | 8.88E-03 |
| ENSG00000187808 | SOWAHD     | -3.37E+00 | 3.41E-03 | 8.95E-03 |
| ENSG00000287825 | AL035587.2 | -2.67E+00 | 3.44E-03 | 9.03E-03 |
| ENSG00000135736 | CCDC102A   | -1.15E+00 | 3.48E-03 | 9.15E-03 |
| ENSG00000198551 | ZNF627     | -1.15E+00 | 3.60E-03 | 9.43E-03 |
| ENSG00000261008 | LINC01572  | -1.70E+00 | 3.62E-03 | 9.46E-03 |
| ENSG00000020181 | ADGRA2     | -1.37E+00 | 3.65E-03 | 9.54E-03 |
| ENSG00000159184 | HOXB13     | -1.24E+00 | 3.70E-03 | 9.66E-03 |
| ENSG00000256043 | CTSO       | -2.07E+00 | 3.80E-03 | 9.88E-03 |
| ENSG00000108797 | CNTNAP1    | -1.09E+00 | 3.81E-03 | 9.90E-03 |
| ENSG00000213462 | ERV3-1     | -1.33E+00 | 3.82E-03 | 9.91E-03 |
| ENSG00000273568 | AC131009.3 | -1.66E+00 | 3.86E-03 | 1.00E-02 |
| ENSG00000123388 | HOXC11     | -1.12E+00 | 3.89E-03 | 1.01E-02 |
| ENSG00000178971 | CTC1       | -1.45E+00 | 3.89E-03 | 1.01E-02 |
| ENSG00000149926 | TLCD3B     | -1.32E+00 | 3.94E-03 | 1.02E-02 |
| ENSG00000171357 | LURAP1     | -1.60E+00 | 3.95E-03 | 1.02E-02 |
| ENSG00000181638 | ZFP41      | -1.09E+00 | 3.98E-03 | 1.03E-02 |
| ENSG00000196611 | MMP1       | -2.59E+00 | 4.20E-03 | 1.08E-02 |
| ENSG00000206195 | DUXAP8     | -1.54E+00 | 4.24E-03 | 1.09E-02 |
| ENSG00000128000 | ZNF780B    | -1.15E+00 | 4.25E-03 | 1.09E-02 |
| ENSG00000276778 | LINC02227  | -2.69E+00 | 4.29E-03 | 1.10E-02 |
| ENSG00000233268 | AL691449.1 | -4.01E+00 | 4.34E-03 | 1.11E-02 |
| ENSG00000224114 | AL591846.1 | -1.19E+00 | 4.36E-03 | 1.12E-02 |
| ENSG00000148450 | MSRB2      | -1.14E+00 | 4.48E-03 | 1.15E-02 |
| ENSG00000244026 | FAM86DP    | -1.00E+00 | 4.48E-03 | 1.15E-02 |
| ENSG00000254598 | CSNK2A3    | -2.04E+00 | 4.51E-03 | 1.15E-02 |
| ENSG00000283563 | AC098650.1 | -4.43E+00 | 4.53E-03 | 1.16E-02 |
| ENSG00000115226 | FNDC4      | -1.86E+00 | 4.55E-03 | 1.16E-02 |
| ENSG00000165959 | CLMN       | -1.19E+00 | 4.55E-03 | 1.16E-02 |
| ENSG00000121964 | GTDC1      | -1.03E+00 | 4.59E-03 | 1.17E-02 |
| ENSG00000106631 | MYL7       | -1.58E+00 | 4.63E-03 | 1.18E-02 |

|                 |            |           |          |          |
|-----------------|------------|-----------|----------|----------|
| ENSG00000205213 | LGR4       | -1.56E+00 | 4.63E-03 | 1.18E-02 |
| ENSG00000126860 | EVI2A      | -4.32E+00 | 4.71E-03 | 1.20E-02 |
| ENSG00000273247 | AC097376.3 | -1.26E+00 | 4.74E-03 | 1.20E-02 |
| ENSG00000099795 | NDUFB7     | -1.17E+00 | 4.76E-03 | 1.21E-02 |
| ENSG00000207175 | RNU1-67P   | -3.25E+00 | 4.81E-03 | 1.22E-02 |
| ENSG00000158457 | TSPAN33    | -1.17E+00 | 4.85E-03 | 1.23E-02 |
| ENSG00000261051 | AC107021.2 | -2.45E+00 | 4.85E-03 | 1.23E-02 |
| ENSG00000197142 | ACSL5      | -2.26E+00 | 4.88E-03 | 1.24E-02 |
| ENSG00000227525 | RPL7P6     | -1.54E+00 | 4.97E-03 | 1.26E-02 |
| ENSG00000104863 | LIN7B      | -1.23E+00 | 4.98E-03 | 1.26E-02 |
| ENSG00000241886 | AC112496.1 | -3.07E+00 | 5.00E-03 | 1.26E-02 |
| ENSG00000137700 | SLC37A4    | -1.11E+00 | 5.07E-03 | 1.28E-02 |
| ENSG00000139874 | SSTR1      | -4.86E+00 | 5.07E-03 | 1.28E-02 |
| ENSG00000164405 | UQCRQ      | -1.04E+00 | 5.09E-03 | 1.28E-02 |
| ENSG00000213654 | GPSM3      | -1.72E+00 | 5.09E-03 | 1.28E-02 |
| ENSG00000267270 | PARD6G-AS1 | -2.07E+00 | 5.11E-03 | 1.29E-02 |
| ENSG00000136682 | CBWD2      | -1.55E+00 | 5.14E-03 | 1.30E-02 |
| ENSG00000139973 | SYT16      | -2.51E+00 | 5.17E-03 | 1.30E-02 |
| ENSG00000189144 | ZNF573     | -1.97E+00 | 5.18E-03 | 1.30E-02 |
| ENSG00000164304 | CAGE1      | -3.07E+00 | 5.19E-03 | 1.31E-02 |
| ENSG00000272447 | AL135925.1 | -1.36E+00 | 5.21E-03 | 1.31E-02 |
| ENSG00000234912 | SNHG20     | -1.44E+00 | 5.25E-03 | 1.32E-02 |
| ENSG00000269927 | AC004817.3 | -3.79E+00 | 5.28E-03 | 1.33E-02 |
| ENSG00000179750 | APOBEC3B   | -1.51E+00 | 5.30E-03 | 1.33E-02 |
| ENSG00000160172 | FAM86C2P   | -3.15E+00 | 5.33E-03 | 1.34E-02 |
| ENSG00000276007 | AC079414.3 | -1.67E+00 | 5.39E-03 | 1.35E-02 |
| ENSG00000188060 | RAB42      | -2.19E+00 | 5.61E-03 | 1.40E-02 |
| ENSG00000138769 | CDKL2      | -2.01E+00 | 5.67E-03 | 1.41E-02 |
| ENSG00000136014 | USP44      | -2.58E+00 | 5.75E-03 | 1.43E-02 |
| ENSG00000180354 | MTURN      | -1.21E+00 | 5.76E-03 | 1.44E-02 |
| ENSG00000134668 | SPOCD1     | -1.17E+00 | 5.80E-03 | 1.44E-02 |
| ENSG00000183474 | GTF2H2C    | -1.65E+00 | 5.80E-03 | 1.44E-02 |
| ENSG00000100802 | C14orf93   | -1.16E+00 | 5.91E-03 | 1.47E-02 |
| ENSG00000184178 | SCFD2      | -1.30E+00 | 5.93E-03 | 1.47E-02 |
| ENSG00000128011 | LRFN1      | -1.34E+00 | 5.94E-03 | 1.48E-02 |
| ENSG00000242852 | ZNF709     | -3.34E+00 | 5.96E-03 | 1.48E-02 |
| ENSG00000287966 | AL590062.1 | -1.94E+00 | 5.98E-03 | 1.48E-02 |
| ENSG00000250320 | AC113383.1 | -1.06E+00 | 6.08E-03 | 1.51E-02 |
| ENSG00000280161 | AC022413.1 | -2.68E+00 | 6.15E-03 | 1.52E-02 |
| ENSG00000213598 | AL049873.1 | -2.49E+00 | 6.17E-03 | 1.53E-02 |

|                 |            |           |          |          |
|-----------------|------------|-----------|----------|----------|
| ENSG00000248890 | HHIP-AS1   | -1.69E+00 | 6.20E-03 | 1.53E-02 |
| ENSG00000260025 | CRIM1-DT   | -1.83E+00 | 6.29E-03 | 1.55E-02 |
| ENSG00000173432 | SAA1       | -3.37E+00 | 6.35E-03 | 1.57E-02 |
| ENSG00000178752 | ERFE       | -1.10E+00 | 6.35E-03 | 1.57E-02 |
| ENSG00000133134 | BEX2       | -1.39E+00 | 6.39E-03 | 1.57E-02 |
| ENSG00000180346 | TIGD2      | -1.16E+00 | 6.42E-03 | 1.58E-02 |
| ENSG00000198298 | ZNF485     | -1.55E+00 | 6.53E-03 | 1.60E-02 |
| ENSG00000279739 | AC011369.2 | -3.18E+00 | 6.58E-03 | 1.62E-02 |
| ENSG00000238000 | AC116347.1 | -3.15E+00 | 6.58E-03 | 1.62E-02 |
| ENSG00000172728 | FUT10      | -1.22E+00 | 6.59E-03 | 1.62E-02 |
| ENSG00000197358 | BNIP3P1    | -1.99E+00 | 6.66E-03 | 1.63E-02 |
| ENSG00000144730 | IL17RD     | -1.74E+00 | 6.66E-03 | 1.63E-02 |
| ENSG00000131668 | BARX1      | -1.38E+00 | 6.71E-03 | 1.64E-02 |
| ENSG00000106701 | FSD1L      | -1.07E+00 | 6.74E-03 | 1.65E-02 |
| ENSG00000153237 | CCDC148    | -2.36E+00 | 6.76E-03 | 1.65E-02 |
| ENSG00000133111 | RFXAP      | -1.23E+00 | 6.79E-03 | 1.66E-02 |
| ENSG00000278931 | CR381670.1 | -3.27E+00 | 6.81E-03 | 1.66E-02 |
| ENSG00000198732 | SMOC1      | -3.22E+00 | 6.84E-03 | 1.67E-02 |
| ENSG00000145723 | GIN1       | -1.24E+00 | 6.87E-03 | 1.68E-02 |
| ENSG00000164038 | SLC9B2     | -1.14E+00 | 6.95E-03 | 1.70E-02 |
| ENSG00000280734 | LINC01232  | -1.62E+00 | 7.18E-03 | 1.75E-02 |
| ENSG00000153832 | FBXO36     | -2.92E+00 | 7.21E-03 | 1.76E-02 |
| ENSG00000162976 | SLC66A3    | -1.57E+00 | 7.28E-03 | 1.77E-02 |
| ENSG00000101265 | RASSF2     | -1.39E+00 | 7.36E-03 | 1.79E-02 |
| ENSG00000166971 | AKTIP      | -1.19E+00 | 7.45E-03 | 1.81E-02 |
| ENSG00000198795 | ZNF521     | -2.25E+00 | 7.51E-03 | 1.82E-02 |
| ENSG00000233328 | PFN1P1     | -1.13E+00 | 7.55E-03 | 1.83E-02 |
| ENSG00000070371 | CLTCL1     | -1.15E+00 | 7.58E-03 | 1.84E-02 |
| ENSG00000234753 | FOXP4-AS1  | -2.12E+00 | 7.66E-03 | 1.85E-02 |
| ENSG00000212232 | SNORD17    | -2.43E+00 | 7.67E-03 | 1.85E-02 |
| ENSG00000243181 | AC087343.1 | -2.78E+00 | 7.75E-03 | 1.87E-02 |
| ENSG00000111801 | BTN3A3     | -1.35E+00 | 7.77E-03 | 1.88E-02 |
| ENSG00000027075 | PRKCH      | -1.13E+00 | 7.78E-03 | 1.88E-02 |
| ENSG00000169083 | AR         | -1.31E+00 | 7.90E-03 | 1.91E-02 |
| ENSG00000146411 | SLC2A12    | -2.59E+00 | 7.93E-03 | 1.91E-02 |
| ENSG00000242960 | FTH1P23    | -3.17E+00 | 7.96E-03 | 1.92E-02 |
| ENSG00000163611 | SPICE1     | -1.05E+00 | 8.03E-03 | 1.93E-02 |
| ENSG00000267919 | AC009955.2 | -3.61E+00 | 8.10E-03 | 1.95E-02 |
| ENSG00000155016 | CYP2U1     | -1.33E+00 | 8.20E-03 | 1.97E-02 |
| ENSG00000215190 | LINC00680  | -1.10E+00 | 8.47E-03 | 2.03E-02 |

|                 |            |           |          |          |
|-----------------|------------|-----------|----------|----------|
| ENSG00000164616 | FBXL21P    | -3.19E+00 | 8.54E-03 | 2.04E-02 |
| ENSG00000240509 | RPL34P18   | -2.87E+00 | 8.54E-03 | 2.04E-02 |
| ENSG00000228519 | AC097263.1 | -1.48E+00 | 8.61E-03 | 2.06E-02 |
| ENSG00000280219 | AC093908.1 | -3.41E+00 | 8.62E-03 | 2.06E-02 |
| ENSG00000277901 | AL390037.1 | -4.64E+00 | 8.74E-03 | 2.08E-02 |
| ENSG00000121690 | DEPDC7     | -1.18E+00 | 9.04E-03 | 2.15E-02 |
| ENSG00000271334 | LINC02104  | -1.37E+00 | 9.11E-03 | 2.16E-02 |
| ENSG00000125538 | IL1B       | -2.48E+00 | 9.12E-03 | 2.17E-02 |
| ENSG00000243964 | RPL23AP65  | -1.27E+00 | 9.22E-03 | 2.19E-02 |
| ENSG00000272808 | AC015712.6 | -3.11E+00 | 9.27E-03 | 2.20E-02 |
| ENSG00000202222 | Y_RNA      | -3.24E+00 | 9.30E-03 | 2.20E-02 |
| ENSG00000163704 | PRRT3      | -1.20E+00 | 9.40E-03 | 2.23E-02 |
| ENSG00000247595 | SPTY2D1OS  | -1.29E+00 | 9.51E-03 | 2.25E-02 |
| ENSG00000225573 | RPL35P5    | -2.39E+00 | 9.57E-03 | 2.26E-02 |
| ENSG00000232533 | AC093673.1 | -1.01E+00 | 9.64E-03 | 2.28E-02 |
| ENSG00000224616 | RTCA-AS1   | -1.54E+00 | 9.74E-03 | 2.30E-02 |
| ENSG00000138400 | MDH1B      | -2.96E+00 | 9.85E-03 | 2.32E-02 |
| ENSG00000225880 | LINC00115  | -2.79E+00 | 9.97E-03 | 2.35E-02 |
| ENSG00000259583 | AC015712.2 | -1.44E+00 | 9.98E-03 | 2.35E-02 |
| ENSG00000138028 | CGREF1     | -1.90E+00 | 1.01E-02 | 2.38E-02 |
| ENSG00000260774 | AC021087.3 | -3.30E+00 | 1.02E-02 | 2.40E-02 |
| ENSG00000163431 | LMOD1      | -3.54E+00 | 1.03E-02 | 2.41E-02 |
| ENSG00000254363 | AC011379.2 | -2.96E+00 | 1.03E-02 | 2.43E-02 |
| ENSG00000137571 | SLCO5A1    | -4.34E+00 | 1.05E-02 | 2.46E-02 |
| ENSG00000166136 | NDUFB8     | -1.16E+00 | 1.06E-02 | 2.48E-02 |
| ENSG00000169193 | CCDC126    | -1.17E+00 | 1.06E-02 | 2.48E-02 |
| ENSG00000113119 | TMCO6      | -1.14E+00 | 1.08E-02 | 2.53E-02 |
| ENSG0000016391  | CHDH       | -2.90E+00 | 1.09E-02 | 2.53E-02 |
| ENSG00000133121 | STARD13    | -1.05E+00 | 1.09E-02 | 2.53E-02 |
| ENSG00000169126 | ARMC4      | -3.12E+00 | 1.09E-02 | 2.54E-02 |
| ENSG00000225163 | LINC00618  | -1.91E+00 | 1.10E-02 | 2.57E-02 |
| ENSG00000178878 | APOLD1     | -1.15E+00 | 1.12E-02 | 2.60E-02 |
| ENSG00000259209 | AC004943.1 | -4.77E+00 | 1.13E-02 | 2.63E-02 |
| ENSG00000242094 | FOXP1-IT1  | -1.61E+00 | 1.16E-02 | 2.69E-02 |
| ENSG00000047648 | ARHGAP6    | -1.05E+00 | 1.17E-02 | 2.71E-02 |
| ENSG00000259518 | LINC01583  | -2.80E+00 | 1.17E-02 | 2.72E-02 |
| ENSG00000137965 | IFI44      | -1.04E+00 | 1.17E-02 | 2.72E-02 |
| ENSG00000285077 | AC091057.6 | -1.85E+00 | 1.18E-02 | 2.73E-02 |
| ENSG00000145703 | IQGAP2     | -2.04E+00 | 1.20E-02 | 2.77E-02 |
| ENSG00000275457 | AL117332.1 | -1.13E+00 | 1.21E-02 | 2.78E-02 |

|                 |             |           |          |          |
|-----------------|-------------|-----------|----------|----------|
| ENSG00000276174 | AC087683.2  | -2.84E+00 | 1.22E-02 | 2.80E-02 |
| ENSG00000255874 | LINC00346   | -1.15E+00 | 1.22E-02 | 2.82E-02 |
| ENSG00000224287 | MSL3P1      | -2.89E+00 | 1.27E-02 | 2.90E-02 |
| ENSG00000139329 | LUM         | -3.00E+00 | 1.27E-02 | 2.91E-02 |
| ENSG00000163637 | PRICKLE2    | -1.08E+00 | 1.27E-02 | 2.91E-02 |
| ENSG00000188227 | ZNF793      | -1.19E+00 | 1.28E-02 | 2.92E-02 |
| ENSG00000260563 | AC132872.1  | -1.75E+00 | 1.29E-02 | 2.94E-02 |
| ENSG00000105072 | C19orf44    | -1.00E+00 | 1.29E-02 | 2.94E-02 |
| ENSG00000214029 | ZNF891      | -1.18E+00 | 1.31E-02 | 2.98E-02 |
| ENSG00000212567 | AC008810.1  | -3.68E+00 | 1.31E-02 | 2.99E-02 |
| ENSG00000258704 | SRP54-AS1   | -1.28E+00 | 1.32E-02 | 3.00E-02 |
| ENSG00000146350 | TBC1D32     | -1.04E+00 | 1.32E-02 | 3.02E-02 |
| ENSG00000101298 | SNPH        | -1.59E+00 | 1.34E-02 | 3.04E-02 |
| ENSG00000254469 | AP002495.1  | -1.62E+00 | 1.36E-02 | 3.08E-02 |
| ENSG00000173077 | DEC1        | -1.70E+00 | 1.37E-02 | 3.11E-02 |
| ENSG00000186132 | C2orf76     | -1.14E+00 | 1.37E-02 | 3.12E-02 |
| ENSG00000151743 | AMN1        | -1.17E+00 | 1.38E-02 | 3.14E-02 |
| ENSG00000256061 | DNAAF4      | -1.62E+00 | 1.39E-02 | 3.15E-02 |
| ENSG00000277342 | AC048344.4  | -1.89E+00 | 1.40E-02 | 3.17E-02 |
| ENSG00000271576 | AL359504.2  | -2.28E+00 | 1.41E-02 | 3.19E-02 |
| ENSG00000116885 | OSCP1       | -1.11E+00 | 1.41E-02 | 3.19E-02 |
| ENSG00000086300 | SNX10       | -1.31E+00 | 1.42E-02 | 3.21E-02 |
| ENSG00000154678 | PDE1C       | -1.77E+00 | 1.43E-02 | 3.22E-02 |
| ENSG00000242060 | RPS3AP49    | -1.71E+00 | 1.44E-02 | 3.25E-02 |
| ENSG00000165028 | NIPSNAP3B   | -2.94E+00 | 1.45E-02 | 3.28E-02 |
| ENSG00000180777 | ANKRD30B    | -1.22E+00 | 1.46E-02 | 3.29E-02 |
| ENSG00000129675 | ARHGEF6     | -2.15E+00 | 1.46E-02 | 3.29E-02 |
| ENSG00000233461 | AL445524.1  | -1.34E+00 | 1.46E-02 | 3.30E-02 |
| ENSG00000120937 | NPPB        | -2.33E+00 | 1.48E-02 | 3.32E-02 |
| ENSG00000242242 | NECTIN3-AS1 | -3.15E+00 | 1.48E-02 | 3.32E-02 |
| ENSG00000272121 | AC006058.3  | -1.65E+00 | 1.48E-02 | 3.32E-02 |
| ENSG00000225131 | PSME2P2     | -1.83E+00 | 1.48E-02 | 3.33E-02 |
| ENSG00000248830 | ZNF807      | -3.45E+00 | 1.51E-02 | 3.39E-02 |
| ENSG00000272707 | AC046143.2  | -3.11E+00 | 1.51E-02 | 3.39E-02 |
| ENSG00000169067 | ACTBL2      | -1.10E+00 | 1.52E-02 | 3.42E-02 |
| ENSG00000110455 | ACCS        | -2.60E+00 | 1.53E-02 | 3.43E-02 |
| ENSG00000286874 | AC072054.1  | -3.52E+00 | 1.53E-02 | 3.43E-02 |
| ENSG00000273270 | AC090114.2  | -1.26E+00 | 1.54E-02 | 3.45E-02 |
| ENSG00000169515 | CCDC8       | -1.38E+00 | 1.55E-02 | 3.46E-02 |
| ENSG00000230092 | AL669831.4  | -4.11E+00 | 1.55E-02 | 3.47E-02 |



|                 |            |           |          |          |
|-----------------|------------|-----------|----------|----------|
| ENSG00000225953 | SATB2-AS1  | -1.22E+00 | 1.57E-02 | 3.50E-02 |
| ENSG00000267280 | TBX2-AS1   | -1.43E+00 | 1.58E-02 | 3.52E-02 |
| ENSG00000147894 | C9orf72    | -2.32E+00 | 1.58E-02 | 3.52E-02 |
| ENSG00000250654 | AC023794.4 | -1.37E+00 | 1.58E-02 | 3.53E-02 |
| ENSG00000231903 | AC079354.2 | -2.13E+00 | 1.59E-02 | 3.55E-02 |
| ENSG00000135469 | COQ10A     | -1.24E+00 | 1.61E-02 | 3.58E-02 |
| ENSG00000225616 | AL138785.1 | -1.36E+00 | 1.61E-02 | 3.58E-02 |
| ENSG00000164010 | ERMAP      | -1.23E+00 | 1.63E-02 | 3.62E-02 |
| ENSG00000129295 | LRRC6      | -1.47E+00 | 1.63E-02 | 3.63E-02 |
| ENSG00000135744 | AGT        | -1.45E+00 | 1.65E-02 | 3.65E-02 |
| ENSG00000172137 | CALB2      | -2.51E+00 | 1.65E-02 | 3.65E-02 |
| ENSG00000107902 | LHPP       | -1.18E+00 | 1.67E-02 | 3.70E-02 |
| ENSG00000147041 | SYTL5      | -1.68E+00 | 1.68E-02 | 3.72E-02 |
| ENSG00000259426 | AC027237.3 | -1.54E+00 | 1.68E-02 | 3.73E-02 |
| ENSG00000174586 | ZNF497     | -2.77E+00 | 1.70E-02 | 3.77E-02 |
| ENSG00000174343 | CHRNA9     | -3.71E+00 | 1.71E-02 | 3.78E-02 |
| ENSG00000227805 | RPL21P90   | -2.69E+00 | 1.74E-02 | 3.84E-02 |
| ENSG00000156689 | GLYATL2    | -1.74E+00 | 1.75E-02 | 3.86E-02 |
| ENSG00000102230 | PCYT1B     | -1.65E+00 | 1.75E-02 | 3.86E-02 |
| ENSG00000100271 | TTLL1      | -1.29E+00 | 1.76E-02 | 3.88E-02 |
| ENSG00000235501 | AC105942.1 | -2.24E+00 | 1.79E-02 | 3.94E-02 |
| ENSG00000247626 | MARS2      | -1.16E+00 | 1.79E-02 | 3.95E-02 |
| ENSG00000260400 | AL513534.2 | -2.47E+00 | 1.80E-02 | 3.95E-02 |
| ENSG00000246090 | AP002026.1 | -2.79E+00 | 1.81E-02 | 3.98E-02 |
| ENSG00000175711 | B3GNTL1    | -1.28E+00 | 1.81E-02 | 3.98E-02 |
| ENSG00000273374 | AC069222.1 | -3.23E+00 | 1.85E-02 | 4.05E-02 |
| ENSG00000271936 | AC012073.1 | -1.34E+00 | 1.86E-02 | 4.07E-02 |
| ENSG00000162595 | DIRAS3     | -1.60E+00 | 1.87E-02 | 4.09E-02 |
| ENSG00000154548 | SRSF12     | -1.48E+00 | 1.91E-02 | 4.17E-02 |
| ENSG00000270419 | CAHM       | -1.83E+00 | 1.92E-02 | 4.18E-02 |
| ENSG00000267334 | AC015936.1 | -5.79E+00 | 1.93E-02 | 4.20E-02 |
| ENSG00000251595 | ABCA11P    | -1.42E+00 | 1.93E-02 | 4.21E-02 |
| ENSG00000204623 | ZNRD1ASP   | -1.15E+00 | 1.94E-02 | 4.23E-02 |
| ENSG00000278463 | HIST1H2AB  | -3.03E+00 | 1.95E-02 | 4.25E-02 |
| ENSG00000212588 | SNORA26    | -2.98E+00 | 1.96E-02 | 4.26E-02 |
| ENSG00000222043 | AC079305.1 | -3.63E+00 | 1.96E-02 | 4.26E-02 |
| ENSG00000165905 | LARGE2     | -1.52E+00 | 1.96E-02 | 4.27E-02 |
| ENSG00000237821 | AC083873.1 | -2.38E+00 | 1.97E-02 | 4.28E-02 |
| ENSG00000151490 | PTPRO      | -2.56E+00 | 1.98E-02 | 4.29E-02 |
| ENSG00000171121 | KCNMB3     | -1.43E+00 | 1.99E-02 | 4.32E-02 |

|                 |            |           |          |          |
|-----------------|------------|-----------|----------|----------|
| ENSG00000197557 | TTC30A     | -1.26E+00 | 1.99E-02 | 4.32E-02 |
| ENSG00000234684 | SDCBP2-AS1 | -1.48E+00 | 2.00E-02 | 4.35E-02 |
| ENSG00000013297 | CLDN11     | -1.52E+00 | 2.01E-02 | 4.36E-02 |
| ENSG00000159761 | C16orf86   | -2.27E+00 | 2.02E-02 | 4.39E-02 |
| ENSG00000224167 | LINC01357  | -1.64E+00 | 2.04E-02 | 4.42E-02 |
| ENSG00000144227 | NXPH2      | -1.78E+00 | 2.04E-02 | 4.42E-02 |
| ENSG00000247572 | CKMT2-AS1  | -1.06E+00 | 2.07E-02 | 4.49E-02 |
| ENSG00000261732 | AL031708.1 | -1.80E+00 | 2.08E-02 | 4.50E-02 |
| ENSG00000172671 | ZFAND4     | -1.19E+00 | 2.12E-02 | 4.57E-02 |
| ENSG00000286132 | AC022415.2 | -2.55E+00 | 2.14E-02 | 4.60E-02 |
| ENSG00000250471 | GMPSP1     | -1.22E+00 | 2.14E-02 | 4.61E-02 |
| ENSG00000180425 | C11orf71   | -1.29E+00 | 2.15E-02 | 4.64E-02 |
| ENSG00000135766 | EGLN1      | -2.25E+00 | 2.18E-02 | 4.68E-02 |
| ENSG00000079435 | LIPE       | -1.06E+00 | 2.19E-02 | 4.70E-02 |
| ENSG00000242358 | RPS21P4    | -1.01E+00 | 2.19E-02 | 4.71E-02 |
| ENSG00000243680 | RPL37P23   | -1.10E+00 | 2.20E-02 | 4.73E-02 |
| ENSG00000099957 | P2RX6      | -2.69E+00 | 2.22E-02 | 4.76E-02 |
| ENSG00000054983 | GALC       | -1.28E+00 | 2.23E-02 | 4.79E-02 |
| ENSG00000280099 | AL603750.1 | -2.86E+00 | 2.25E-02 | 4.81E-02 |
| ENSG00000227615 | AP001324.1 | -1.08E+00 | 2.25E-02 | 4.82E-02 |
| ENSG00000269894 | AC018809.1 | -1.83E+00 | 2.29E-02 | 4.89E-02 |
| ENSG00000230001 | AL359095.1 | -3.32E+00 | 2.30E-02 | 4.91E-02 |
| ENSG00000232949 | AC002480.2 | -2.35E+00 | 2.30E-02 | 4.92E-02 |
| ENSG00000227694 | RPL23AP74  | -2.95E+00 | 2.33E-02 | 4.97E-02 |
| ENSG00000133083 | DCLK1      | -1.40E+00 | 2.33E-02 | 4.98E-02 |

**Supplementary table 9. Significant URGs in Ad-KLF4 versus Ad-EGFP transduced samples on IL-1 $\beta$  stimulation.**

| Gene ID         | Gene name | Log2(FC) | P value   | FDR       |
|-----------------|-----------|----------|-----------|-----------|
| ENSG00000110651 | CD81      | 2.92E+00 | 0.00E+00  | 0.00E+00  |
| ENSG00000128422 | KRT17     | 7.70E+00 | 0.00E+00  | 0.00E+00  |
| ENSG00000143320 | CRABP2    | 5.56E+00 | 0.00E+00  | 0.00E+00  |
| ENSG00000143369 | ECM1      | 4.08E+00 | 0.00E+00  | 0.00E+00  |
| ENSG00000170801 | HTRA3     | 5.76E+00 | 0.00E+00  | 0.00E+00  |
| ENSG00000167779 | IGFBP6    | 7.59E+00 | 6.03E-276 | 1.85E-272 |
| ENSG00000168140 | VASN      | 2.93E+00 | 7.00E-260 | 1.84E-256 |
| ENSG00000101311 | FERMT1    | 6.95E+00 | 2.22E-246 | 5.10E-243 |
| ENSG00000186832 | KRT16     | 9.67E+00 | 8.71E-240 | 1.78E-236 |
| ENSG00000006016 | CRLF1     | 5.87E+00 | 6.35E-228 | 1.17E-224 |
| ENSG00000172831 | CES2      | 3.52E+00 | 1.01E-221 | 1.68E-218 |
| ENSG00000136826 | KLF4      | 1.08E+01 | 1.96E-220 | 3.00E-217 |
| ENSG00000124102 | PI3       | 5.44E+00 | 5.23E-208 | 7.38E-205 |
| ENSG00000197324 | LRP10     | 2.25E+00 | 2.04E-207 | 2.68E-204 |
| ENSG00000058668 | ATP2B4    | 4.55E+00 | 2.77E-207 | 3.39E-204 |
| ENSG00000064300 | NGFR      | 5.43E+00 | 1.94E-190 | 2.23E-187 |
| ENSG00000169093 | ASMTL     | 3.29E+00 | 4.18E-189 | 4.52E-186 |
| ENSG00000064195 | DLX3      | 6.88E+00 | 2.14E-187 | 2.19E-184 |
| ENSG00000026297 | RNASET2   | 5.21E+00 | 4.33E-185 | 4.18E-182 |
| ENSG00000149679 | CABLES2   | 3.15E+00 | 2.91E-183 | 2.68E-180 |
| ENSG00000173801 | JUP       | 4.87E+00 | 2.72E-182 | 2.38E-179 |
| ENSG00000102996 | MMP15     | 4.13E+00 | 9.37E-176 | 7.82E-173 |
| ENSG00000197746 | PSAP      | 1.53E+00 | 1.15E-174 | 9.20E-172 |
| ENSG00000171246 | NPTX1     | 5.93E+00 | 3.36E-172 | 2.57E-169 |
| ENSG00000168824 | NSG1      | 7.72E+00 | 2.74E-170 | 2.02E-167 |
| ENSG00000109062 | SLC9A3R1  | 2.73E+00 | 3.27E-168 | 2.31E-165 |
| ENSG00000181790 | ADGRB1    | 6.89E+00 | 4.67E-167 | 3.06E-164 |
| ENSG00000139725 | RHOF      | 5.94E+00 | 7.06E-165 | 4.32E-162 |
| ENSG00000063245 | EPN1      | 2.60E+00 | 2.21E-164 | 1.31E-161 |
| ENSG00000105397 | TYK2      | 3.16E+00 | 8.75E-160 | 4.87E-157 |
| ENSG00000035862 | TIMP2     | 2.52E+00 | 6.51E-158 | 3.52E-155 |
| ENSG00000173546 | CSPG4     | 3.52E+00 | 6.01E-155 | 3.07E-152 |
| ENSG00000135723 | FHOD1     | 3.43E+00 | 2.86E-153 | 1.42E-150 |
| ENSG00000184185 | KCNJ12    | 6.61E+00 | 5.50E-153 | 2.66E-150 |
| ENSG00000179403 | VWA1      | 3.99E+00 | 4.29E-152 | 2.02E-149 |
| ENSG00000168487 | BMP1      | 2.17E+00 | 3.81E-145 | 1.71E-142 |
| ENSG00000140961 | OSGIN1    | 4.42E+00 | 3.78E-144 | 1.65E-141 |
| ENSG00000133466 | C1QTNF6   | 4.30E+00 | 2.94E-135 | 1.23E-132 |
| ENSG00000178053 | MLF1      | 3.48E+00 | 1.03E-133 | 4.20E-131 |
| ENSG00000102265 | TIMP1     | 4.29E+00 | 4.35E-133 | 1.74E-130 |
| ENSG00000063660 | GPC1      | 2.61E+00 | 1.24E-129 | 4.73E-127 |
| ENSG00000175866 | BAIAP2    | 2.73E+00 | 2.91E-129 | 1.09E-126 |
| ENSG00000075618 | FSCN1     | 3.23E+00 | 1.83E-128 | 6.74E-126 |

|                 |          |          |           |           |
|-----------------|----------|----------|-----------|-----------|
| ENSG00000151176 | PLBD2    | 2.93E+00 | 6.06E-128 | 2.18E-125 |
| ENSG00000177666 | PNPLA2   | 3.28E+00 | 5.06E-127 | 1.79E-124 |
| ENSG00000092295 | TGM1     | 6.84E+00 | 8.35E-126 | 2.90E-123 |
| ENSG00000148180 | GSN      | 3.46E+00 | 1.60E-124 | 5.45E-122 |
| ENSG00000089060 | SLC8B1   | 4.54E+00 | 1.01E-120 | 3.21E-118 |
| ENSG00000172270 | BSG      | 2.94E+00 | 2.74E-119 | 8.54E-117 |
| ENSG00000124831 | LRRFIP1  | 2.59E+00 | 6.47E-118 | 1.98E-115 |
| ENSG00000111684 | LPCAT3   | 2.91E+00 | 1.86E-115 | 5.60E-113 |
| ENSG00000070404 | FSTL3    | 3.57E+00 | 4.36E-114 | 1.29E-111 |
| ENSG00000197457 | STMN3    | 3.74E+00 | 8.22E-114 | 2.40E-111 |
| ENSG00000169783 | LINGO1   | 6.48E+00 | 1.96E-113 | 5.63E-111 |
| ENSG00000166165 | CKB      | 3.57E+00 | 2.69E-108 | 7.50E-106 |
| ENSG00000112378 | PERP     | 3.03E+00 | 3.82E-107 | 1.05E-104 |
| ENSG00000110090 | CPT1A    | 3.16E+00 | 9.12E-106 | 2.46E-103 |
| ENSG00000061938 | TNK2     | 3.65E+00 | 1.18E-105 | 3.15E-103 |
| ENSG00000221988 | PPT2     | 2.56E+00 | 3.86E-104 | 9.86E-102 |
| ENSG00000204248 | COL11A2  | 6.72E+00 | 3.78E-103 | 9.52E-101 |
| ENSG00000092068 | SLC7A8   | 7.30E+00 | 3.09E-102 | 7.48E-100 |
| ENSG00000100036 | SLC35E4  | 3.02E+00 | 3.19E-102 | 7.62E-100 |
| ENSG00000167157 | PRRX2    | 5.59E+00 | 1.66E-101 | 3.91E-99  |
| ENSG00000130821 | SLC6A8   | 2.64E+00 | 3.00E-100 | 6.97E-98  |
| ENSG00000188643 | S100A16  | 5.77E+00 | 1.42E-98  | 3.23E-96  |
| ENSG00000104783 | KCNN4    | 6.27E+00 | 1.23E-97  | 2.68E-95  |
| ENSG00000179348 | GATA2    | 3.28E+00 | 1.57E-96  | 3.40E-94  |
| ENSG00000165272 | AQP3     | 6.26E+00 | 4.08E-96  | 8.72E-94  |
| ENSG00000092758 | COL9A3   | 5.09E+00 | 9.19E-95  | 1.94E-92  |
| ENSG00000117984 | CTSD     | 3.12E+00 | 1.02E-94  | 2.14E-92  |
| ENSG00000169583 | CLIC3    | 5.83E+00 | 2.12E-93  | 4.37E-91  |
| ENSG00000129757 | CDKN1C   | 6.52E+00 | 4.34E-93  | 8.87E-91  |
| ENSG00000159720 | ATP6V0D1 | 1.88E+00 | 5.62E-92  | 1.14E-89  |
| ENSG00000148120 | AOPEP    | 3.11E+00 | 8.33E-92  | 1.66E-89  |
| ENSG00000105427 | CNFN     | 4.44E+00 | 3.70E-91  | 7.31E-89  |
| ENSG00000105355 | PLIN3    | 3.00E+00 | 5.30E-91  | 1.04E-88  |
| ENSG00000008710 | PKD1     | 2.53E+00 | 1.86E-90  | 3.59E-88  |
| ENSG00000130702 | LAMA5    | 3.19E+00 | 1.93E-89  | 3.66E-87  |
| ENSG00000198768 | APCDD1L  | 2.47E+00 | 2.02E-88  | 3.74E-86  |
| ENSG00000008513 | ST3GAL1  | 3.16E+00 | 3.02E-88  | 5.55E-86  |
| ENSG00000204103 | MAFB     | 3.93E+00 | 1.49E-87  | 2.71E-85  |
| ENSG00000099875 | MKNK2    | 2.15E+00 | 4.14E-87  | 7.46E-85  |
| ENSG00000205420 | KRT6A    | 1.52E+01 | 9.98E-86  | 1.75E-83  |
| ENSG00000155090 | KLF10    | 2.37E+00 | 1.36E-83  | 2.34E-81  |
| ENSG00000110400 | NECTIN1  | 3.66E+00 | 1.97E-83  | 3.35E-81  |
| ENSG00000105287 | PRKD2    | 2.47E+00 | 2.68E-83  | 4.52E-81  |
| ENSG00000167470 | MIDN     | 2.19E+00 | 2.94E-83  | 4.91E-81  |
| ENSG00000272398 | CD24     | 5.52E+00 | 4.24E-83  | 7.01E-81  |

|                 |          |          |          |          |
|-----------------|----------|----------|----------|----------|
| ENSG00000167600 | CYP2S1   | 4.02E+00 | 5.19E-83 | 8.51E-81 |
| ENSG00000187954 | CYHR1    | 2.19E+00 | 5.71E-83 | 9.29E-81 |
| ENSG00000143162 | CREG1    | 2.78E+00 | 6.00E-83 | 9.66E-81 |
| ENSG00000116260 | QSOX1    | 2.13E+00 | 1.71E-82 | 2.73E-80 |
| ENSG00000100994 | PYGB     | 1.84E+00 | 2.63E-82 | 4.17E-80 |
| ENSG00000185000 | DGAT1    | 3.06E+00 | 6.42E-82 | 1.00E-79 |
| ENSG00000010278 | CD9      | 3.37E+00 | 1.38E-81 | 2.11E-79 |
| ENSG00000188338 | SLC38A3  | 3.99E+00 | 2.01E-81 | 3.05E-79 |
| ENSG00000168056 | LTBP3    | 3.16E+00 | 6.31E-81 | 9.43E-79 |
| ENSG00000225968 | ELFN1    | 4.34E+00 | 1.17E-80 | 1.74E-78 |
| ENSG00000184489 | PTP4A3   | 7.93E+00 | 1.55E-80 | 2.28E-78 |
| ENSG00000130513 | GDF15    | 3.59E+00 | 2.33E-80 | 3.39E-78 |
| ENSG00000125730 | C3       | 4.74E+00 | 1.12E-79 | 1.60E-77 |
| ENSG00000120675 | DNAJC15  | 4.80E+00 | 1.71E-79 | 2.41E-77 |
| ENSG00000135926 | TMBIM1   | 2.97E+00 | 2.66E-79 | 3.73E-77 |
| ENSG00000100504 | PYGL     | 1.96E+00 | 3.55E-78 | 4.87E-76 |
| ENSG00000173442 | EHBP1L1  | 3.52E+00 | 9.34E-78 | 1.27E-75 |
| ENSG00000131069 | ACSS2    | 3.53E+00 | 1.23E-77 | 1.65E-75 |
| ENSG00000109787 | KLF3     | 3.70E+00 | 1.41E-77 | 1.89E-75 |
| ENSG00000104805 | NUCB1    | 2.86E+00 | 2.33E-76 | 3.08E-74 |
| ENSG00000013588 | GPRC5A   | 2.03E+00 | 2.92E-76 | 3.84E-74 |
| ENSG00000101187 | SLCO4A1  | 3.79E+00 | 4.96E-76 | 6.41E-74 |
| ENSG00000055118 | KCNH2    | 7.31E+00 | 1.19E-75 | 1.52E-73 |
| ENSG00000176531 | PHLDB3   | 3.98E+00 | 1.42E-75 | 1.80E-73 |
| ENSG00000042445 | RETSAT   | 2.48E+00 | 3.73E-75 | 4.69E-73 |
| ENSG00000140941 | MAP1LC3B | 1.75E+00 | 5.81E-75 | 7.26E-73 |
| ENSG00000185507 | IRF7     | 3.49E+00 | 2.65E-74 | 3.29E-72 |
| ENSG00000079385 | CEACAM1  | 6.12E+00 | 1.23E-73 | 1.51E-71 |
| ENSG00000173327 | MAP3K11  | 2.08E+00 | 1.89E-73 | 2.31E-71 |
| ENSG00000167778 | SPRYD3   | 3.50E+00 | 1.25E-72 | 1.51E-70 |
| ENSG00000185896 | LAMP1    | 1.24E+00 | 1.39E-72 | 1.67E-70 |
| ENSG00000030582 | GRN      | 2.02E+00 | 1.63E-72 | 1.94E-70 |
| ENSG00000134531 | EMP1     | 4.20E+00 | 3.55E-72 | 4.20E-70 |
| ENSG00000104888 | SLC17A7  | 5.35E+00 | 5.71E-72 | 6.72E-70 |
| ENSG00000143375 | CGN      | 6.28E+00 | 6.48E-72 | 7.58E-70 |
| ENSG00000175084 | DES      | 9.32E+00 | 1.42E-71 | 1.65E-69 |
| ENSG00000109089 | CDR2L    | 1.97E+00 | 1.46E-71 | 1.69E-69 |
| ENSG00000158769 | F11R     | 3.59E+00 | 2.03E-71 | 2.33E-69 |
| ENSG00000206172 | HBA1     | 1.31E+01 | 2.78E-70 | 3.13E-68 |
| ENSG00000065618 | COL17A1  | 9.31E+00 | 3.52E-70 | 3.94E-68 |
| ENSG00000116661 | FBXO2    | 4.20E+00 | 4.99E-70 | 5.56E-68 |
| ENSG00000090776 | EFNB1    | 3.05E+00 | 2.58E-69 | 2.84E-67 |
| ENSG00000085741 | WNT11    | 6.09E+00 | 2.68E-69 | 2.93E-67 |
| ENSG00000154370 | TRIM11   | 2.44E+00 | 3.62E-69 | 3.93E-67 |
| ENSG00000148344 | PTGES    | 5.86E+00 | 5.67E-69 | 6.13E-67 |

|                 |          |          |          |          |
|-----------------|----------|----------|----------|----------|
| ENSG0000001617  | SEMA3F   | 4.64E+00 | 2.97E-68 | 3.13E-66 |
| ENSG00000148671 | ADIRF    | 7.91E+00 | 1.12E-67 | 1.18E-65 |
| ENSG00000124216 | SNAI1    | 1.76E+00 | 1.99E-67 | 2.08E-65 |
| ENSG00000157227 | MMP14    | 2.62E+00 | 4.07E-67 | 4.23E-65 |
| ENSG00000085978 | ATG16L1  | 2.50E+00 | 7.30E-67 | 7.49E-65 |
| ENSG00000178209 | PLEC     | 2.92E+00 | 8.16E-67 | 8.33E-65 |
| ENSG00000076356 | PLXNA2   | 4.32E+00 | 9.39E-67 | 9.53E-65 |
| ENSG00000088836 | SLC4A11  | 2.98E+00 | 1.01E-66 | 1.02E-64 |
| ENSG00000128274 | A4GALT   | 3.82E+00 | 1.37E-66 | 1.38E-64 |
| ENSG00000066248 | NGEF     | 8.33E+00 | 1.61E-66 | 1.61E-64 |
| ENSG00000112139 | MDGA1    | 4.64E+00 | 8.03E-66 | 7.97E-64 |
| ENSG00000071553 | ATP6AP1  | 1.84E+00 | 1.69E-65 | 1.67E-63 |
| ENSG00000116701 | NCF2     | 8.49E+00 | 2.61E-65 | 2.55E-63 |
| ENSG00000196154 | S100A4   | 5.79E+00 | 6.91E-65 | 6.68E-63 |
| ENSG00000204539 | CDSN     | 1.33E+01 | 8.47E-65 | 8.14E-63 |
| ENSG00000123992 | DNPEP    | 2.41E+00 | 1.05E-63 | 1.00E-61 |
| ENSG00000131037 | EPS8L1   | 4.33E+00 | 1.20E-63 | 1.15E-61 |
| ENSG00000142627 | EPHA2    | 2.58E+00 | 1.66E-63 | 1.57E-61 |
| ENSG00000006712 | PAF1     | 1.62E+00 | 6.45E-63 | 6.00E-61 |
| ENSG00000186806 | VSIG10L  | 5.76E+00 | 8.68E-63 | 8.01E-61 |
| ENSG00000032444 | PNPLA6   | 1.83E+00 | 1.52E-62 | 1.39E-60 |
| ENSG00000148346 | LCN2     | 9.44E+00 | 3.42E-62 | 3.11E-60 |
| ENSG00000124570 | SERPINB6 | 2.08E+00 | 5.58E-62 | 5.02E-60 |
| ENSG00000107731 | UNC5B    | 4.57E+00 | 5.82E-62 | 5.22E-60 |
| ENSG00000213722 | DDAH2    | 3.03E+00 | 6.53E-62 | 5.83E-60 |
| ENSG00000196352 | CD55     | 3.88E+00 | 1.34E-61 | 1.19E-59 |
| ENSG00000139433 | GLTP     | 2.30E+00 | 1.52E-61 | 1.34E-59 |
| ENSG00000260458 | KCNJ18   | 1.30E+01 | 5.28E-61 | 4.64E-59 |
| ENSG00000130707 | ASS1     | 2.68E+00 | 5.62E-61 | 4.92E-59 |
| ENSG00000105048 | TNNT1    | 3.68E+00 | 2.24E-60 | 1.95E-58 |
| ENSG00000158555 | GDPD5    | 3.86E+00 | 8.08E-60 | 6.94E-58 |
| ENSG00000140545 | MFGE8    | 2.42E+00 | 8.76E-60 | 7.48E-58 |
| ENSG00000143631 | FLG      | 1.27E+01 | 1.49E-59 | 1.27E-57 |
| ENSG00000147676 | MAL2     | 6.50E+00 | 2.01E-59 | 1.71E-57 |
| ENSG00000171159 | C9orf16  | 3.93E+00 | 2.90E-59 | 2.44E-57 |
| ENSG00000107819 | SFXN3    | 2.92E+00 | 3.13E-59 | 2.63E-57 |
| ENSG00000162040 | HS3ST6   | 8.43E+00 | 5.34E-59 | 4.46E-57 |
| ENSG00000178951 | ZBTB7A   | 2.03E+00 | 6.19E-59 | 5.15E-57 |
| ENSG00000188536 | HBA2     | 1.26E+01 | 9.92E-59 | 8.17E-57 |
| ENSG00000168918 | INPP5D   | 5.54E+00 | 1.55E-58 | 1.26E-56 |
| ENSG00000141524 | TMC6     | 3.81E+00 | 1.58E-58 | 1.28E-56 |
| ENSG00000101210 | EEF1A2   | 3.02E+00 | 3.98E-58 | 3.23E-56 |
| ENSG00000197976 | AKAP17A  | 1.94E+00 | 4.95E-58 | 3.99E-56 |
| ENSG00000176046 | NUPR1    | 3.87E+00 | 5.26E-58 | 4.22E-56 |
| ENSG00000124107 | SLPI     | 6.46E+00 | 2.31E-57 | 1.84E-55 |

|                 |          |          |          |          |
|-----------------|----------|----------|----------|----------|
| ENSG00000141503 | MINK1    | 2.25E+00 | 4.20E-57 | 3.31E-55 |
| ENSG00000164530 | PI16     | 1.28E+01 | 4.31E-57 | 3.38E-55 |
| ENSG00000240583 | AQP1     | 1.03E+01 | 5.19E-57 | 4.06E-55 |
| ENSG00000122756 | CNTFR    | 4.23E+00 | 5.50E-57 | 4.28E-55 |
| ENSG00000119862 | LGALS1   | 4.42E+00 | 6.58E-57 | 5.10E-55 |
| ENSG00000065054 | SLC9A3R2 | 2.96E+00 | 7.28E-57 | 5.62E-55 |
| ENSG00000100092 | SH3BP1   | 3.43E+00 | 2.16E-56 | 1.64E-54 |
| ENSG00000166925 | TSC22D4  | 1.99E+00 | 3.97E-56 | 2.99E-54 |
| ENSG00000138944 | SHISAL1  | 4.33E+00 | 1.31E-55 | 9.72E-54 |
| ENSG00000021355 | SERPINB1 | 3.24E+00 | 1.61E-55 | 1.19E-53 |
| ENSG00000010438 | PRSS3    | 5.25E+00 | 3.40E-55 | 2.50E-53 |
| ENSG00000112576 | CCND3    | 1.87E+00 | 3.79E-55 | 2.77E-53 |
| ENSG00000124942 | AHNAK    | 2.51E+00 | 6.39E-55 | 4.64E-53 |
| ENSG00000143590 | EFNA3    | 3.86E+00 | 1.36E-54 | 9.78E-53 |
| ENSG00000111341 | MGP      | 7.82E+00 | 2.77E-54 | 1.98E-52 |
| ENSG00000182759 | MAFA     | 3.94E+00 | 3.12E-54 | 2.22E-52 |
| ENSG00000068305 | MEF2A    | 2.09E+00 | 4.17E-54 | 2.95E-52 |
| ENSG00000114859 | CLCN2    | 3.57E+00 | 4.80E-54 | 3.38E-52 |
| ENSG00000163993 | S100P    | 1.22E+01 | 6.92E-54 | 4.86E-52 |
| ENSG00000149782 | PLCB3    | 2.61E+00 | 8.11E-54 | 5.62E-52 |
| ENSG00000188064 | WNT7B    | 4.81E+00 | 9.84E-54 | 6.80E-52 |
| ENSG00000116017 | ARID3A   | 2.88E+00 | 1.76E-53 | 1.21E-51 |
| ENSG00000123384 | LRP1     | 3.28E+00 | 1.90E-53 | 1.31E-51 |
| ENSG00000100605 | ITPK1    | 3.79E+00 | 2.17E-53 | 1.48E-51 |
| ENSG00000012171 | SEMA3B   | 4.35E+00 | 2.74E-53 | 1.85E-51 |
| ENSG00000166619 | BLCAP    | 1.75E+00 | 2.91E-53 | 1.96E-51 |
| ENSG00000175793 | SFN      | 5.77E+00 | 3.53E-53 | 2.36E-51 |
| ENSG00000141232 | TOB1     | 1.85E+00 | 4.13E-53 | 2.75E-51 |
| ENSG00000128591 | FLNC     | 1.85E+00 | 6.61E-53 | 4.37E-51 |
| ENSG00000160789 | LMNA     | 1.91E+00 | 7.52E-53 | 4.95E-51 |
| ENSG00000074370 | ATP2A3   | 5.61E+00 | 2.51E-52 | 1.65E-50 |
| ENSG00000167106 | FAM102A  | 2.62E+00 | 2.82E-52 | 1.84E-50 |
| ENSG00000185567 | AHNAK2   | 6.39E+00 | 3.15E-52 | 2.05E-50 |
| ENSG00000099204 | ABLIM1   | 2.81E+00 | 5.84E-52 | 3.78E-50 |
| ENSG00000142798 | HSPG2    | 3.93E+00 | 8.47E-52 | 5.46E-50 |
| ENSG00000148426 | PROSER2  | 3.97E+00 | 1.11E-51 | 7.11E-50 |
| ENSG00000162545 | CAMK2N1  | 2.35E+00 | 3.12E-51 | 1.99E-49 |
| ENSG00000104879 | CKM      | 1.13E+01 | 3.35E-51 | 2.13E-49 |
| ENSG00000205336 | ADGRG1   | 2.92E+00 | 3.41E-51 | 2.16E-49 |
| ENSG00000134504 | KCTD1    | 2.44E+00 | 4.11E-51 | 2.60E-49 |
| ENSG00000133612 | AGAP3    | 1.99E+00 | 5.00E-51 | 3.15E-49 |
| ENSG00000160685 | ZBTB7B   | 3.02E+00 | 8.04E-51 | 5.04E-49 |
| ENSG00000083454 | P2RX5    | 2.69E+00 | 9.31E-51 | 5.82E-49 |
| ENSG00000148331 | ASB6     | 2.40E+00 | 1.28E-50 | 7.95E-49 |
| ENSG00000099337 | KCNK6    | 3.09E+00 | 1.40E-50 | 8.63E-49 |

|                  |          |          |          |          |
|------------------|----------|----------|----------|----------|
| ENSG00000076826  | CAMSAP3  | 7.23E+00 | 1.61E-50 | 9.89E-49 |
| ENSG00000148411  | NACC2    | 2.05E+00 | 1.62E-50 | 9.94E-49 |
| ENSG00000169442  | CD52     | 8.18E+00 | 8.07E-50 | 4.89E-48 |
| ENSG00000085552  | IGSF9    | 5.84E+00 | 8.59E-50 | 5.19E-48 |
| ENSG00000182492  | BGN      | 2.92E+00 | 1.49E-49 | 8.92E-48 |
| ENSG00000130589  | HELZ2    | 2.41E+00 | 2.30E-49 | 1.38E-47 |
| ENSG00000253368  | TRNP1    | 3.51E+00 | 2.50E-49 | 1.49E-47 |
| ENSG00000100242  | SUN2     | 1.42E+00 | 2.76E-49 | 1.64E-47 |
| ENSG00000149260  | CAPN5    | 2.54E+00 | 2.87E-49 | 1.70E-47 |
| ENSG00000143217  | NECTIN4  | 4.39E+00 | 3.23E-49 | 1.89E-47 |
| ENSG00000171604  | CXXC5    | 1.60E+00 | 6.93E-49 | 4.04E-47 |
| ENSG00000079308  | TNS1     | 3.50E+00 | 2.75E-48 | 1.58E-46 |
| ENSG00000076351  | SLC46A1  | 3.75E+00 | 4.76E-48 | 2.72E-46 |
| ENSG00000038427  | VCAN     | 3.53E+00 | 4.86E-48 | 2.77E-46 |
| ENSG00000173868  | PHOSPHO1 | 8.10E+00 | 7.55E-48 | 4.30E-46 |
| ENSG00000225783  | MIAT     | 8.32E+00 | 8.17E-48 | 4.63E-46 |
| ENSG00000105443  | CYTH2    | 1.76E+00 | 1.61E-47 | 9.11E-46 |
| ENSG00000167642  | SPINT2   | 6.68E+00 | 1.78E-47 | 1.00E-45 |
| ENSG00000007372  | PAX6     | 3.41E+00 | 2.84E-47 | 1.59E-45 |
| ENSG000000093167 | LRRFIP2  | 1.94E+00 | 3.35E-47 | 1.86E-45 |
| ENSG00000177335  | C8orf31  | 7.32E+00 | 7.11E-47 | 3.93E-45 |
| ENSG00000159314  | ARHGAP27 | 3.68E+00 | 1.12E-46 | 6.20E-45 |
| ENSG00000176903  | PNMA1    | 1.72E+00 | 1.44E-46 | 7.91E-45 |
| ENSG00000196878  | LAMB3    | 2.99E+00 | 2.62E-46 | 1.42E-44 |
| ENSG00000158050  | DUSP2    | 4.63E+00 | 2.93E-46 | 1.59E-44 |
| ENSG00000198576  | ARC      | 7.38E+00 | 9.84E-46 | 5.32E-44 |
| ENSG00000174640  | SLCO2A1  | 2.98E+00 | 1.23E-45 | 6.65E-44 |
| ENSG00000114854  | TNNC1    | 8.41E+00 | 1.62E-45 | 8.73E-44 |
| ENSG00000130203  | APOE     | 3.70E+00 | 2.24E-45 | 1.20E-43 |
| ENSG00000143793  | C1orf35  | 1.91E+00 | 2.35E-45 | 1.25E-43 |
| ENSG00000129437  | KLK14    | 1.02E+01 | 2.84E-45 | 1.51E-43 |
| ENSG00000107738  | VSIR     | 3.70E+00 | 5.36E-45 | 2.81E-43 |
| ENSG00000176845  | METRNL   | 2.14E+00 | 7.79E-45 | 4.06E-43 |
| ENSG00000130766  | SESN2    | 2.25E+00 | 8.54E-45 | 4.44E-43 |
| ENSG00000186854  | TRABD2A  | 3.04E+00 | 1.38E-44 | 7.15E-43 |
| ENSG00000145782  | ATG12    | 1.59E+00 | 4.94E-44 | 2.55E-42 |
| ENSG00000172667  | ZMAT3    | 1.91E+00 | 5.23E-44 | 2.69E-42 |
| ENSG00000136802  | LRRC8A   | 1.65E+00 | 6.33E-44 | 3.25E-42 |
| ENSG00000167656  | LY6D     | 1.10E+01 | 7.95E-44 | 4.07E-42 |
| ENSG00000103089  | FA2H     | 9.96E+00 | 1.22E-43 | 6.20E-42 |
| ENSG00000065357  | DGKA     | 3.55E+00 | 1.29E-43 | 6.54E-42 |
| ENSG00000167702  | KIFC2    | 3.36E+00 | 1.56E-43 | 7.92E-42 |
| ENSG00000186635  | ARAP1    | 2.72E+00 | 1.77E-43 | 8.96E-42 |
| ENSG00000149218  | ENDOD1   | 3.46E+00 | 2.54E-43 | 1.28E-41 |
| ENSG00000131584  | ACAP3    | 2.36E+00 | 3.65E-43 | 1.83E-41 |



|                 |          |          |          |          |
|-----------------|----------|----------|----------|----------|
| ENSG00000110628 | SLC22A18 | 4.12E+00 | 4.04E-43 | 2.02E-41 |
| ENSG00000196576 | PLXNB2   | 1.87E+00 | 4.87E-43 | 2.43E-41 |
| ENSG00000100867 | DHRS2    | 4.14E+00 | 6.13E-43 | 3.04E-41 |
| ENSG00000162552 | WNT4     | 5.41E+00 | 6.87E-43 | 3.40E-41 |
| ENSG00000069011 | PITX1    | 1.84E+00 | 7.19E-43 | 3.55E-41 |
| ENSG00000092820 | EZR      | 1.31E+00 | 9.59E-43 | 4.70E-41 |
| ENSG00000059728 | MXD1     | 3.06E+00 | 9.65E-43 | 4.72E-41 |
| ENSG00000146054 | TRIM7    | 3.34E+00 | 1.12E-42 | 5.46E-41 |
| ENSG00000245532 | NEAT1    | 1.35E+00 | 1.12E-42 | 5.47E-41 |
| ENSG00000169710 | FASN     | 2.34E+00 | 1.31E-42 | 6.36E-41 |
| ENSG00000092929 | UNC13D   | 6.03E+00 | 1.57E-42 | 7.57E-41 |
| ENSG00000160691 | SHC1     | 1.14E+00 | 1.72E-42 | 8.26E-41 |
| ENSG00000075043 | KCNQ2    | 4.46E+00 | 1.96E-42 | 9.41E-41 |
| ENSG00000160293 | VAV2     | 1.91E+00 | 4.15E-42 | 1.97E-40 |
| ENSG00000129451 | KLK10    | 1.07E+01 | 4.76E-42 | 2.25E-40 |
| ENSG00000140937 | CDH11    | 2.08E+00 | 4.80E-42 | 2.26E-40 |
| ENSG00000162413 | KLHL21   | 2.05E+00 | 6.22E-42 | 2.93E-40 |
| ENSG00000180190 | TDRP     | 3.50E+00 | 6.53E-42 | 3.07E-40 |
| ENSG00000080503 | SMARCA2  | 2.66E+00 | 9.22E-42 | 4.31E-40 |
| ENSG00000147804 | SLC39A4  | 1.05E+01 | 1.12E-41 | 5.23E-40 |
| ENSG00000105519 | CAPS     | 6.98E+00 | 1.14E-41 | 5.31E-40 |
| ENSG00000144476 | ACKR3    | 1.06E+01 | 1.46E-41 | 6.77E-40 |
| ENSG00000188112 | C6orf132 | 4.39E+00 | 1.48E-41 | 6.84E-40 |
| ENSG00000182580 | EPHB3    | 3.63E+00 | 1.51E-41 | 6.96E-40 |
| ENSG00000011347 | SYT7     | 3.70E+00 | 1.85E-41 | 8.50E-40 |
| ENSG00000101421 | CHMP4B   | 1.19E+00 | 2.35E-41 | 1.08E-39 |
| ENSG00000063322 | MED29    | 1.92E+00 | 3.28E-41 | 1.50E-39 |
| ENSG00000164221 | CCDC112  | 2.59E+00 | 6.74E-41 | 3.06E-39 |
| ENSG00000164889 | SLC4A2   | 1.12E+00 | 1.09E-40 | 4.93E-39 |
| ENSG00000203485 | INF2     | 2.06E+00 | 1.10E-40 | 4.95E-39 |
| ENSG00000131620 | ANO1     | 6.76E+00 | 1.16E-40 | 5.20E-39 |
| ENSG00000163961 | RNF168   | 1.67E+00 | 1.30E-40 | 5.82E-39 |
| ENSG00000179604 | CDC42EP4 | 1.79E+00 | 1.32E-40 | 5.89E-39 |
| ENSG00000101782 | RIOK3    | 1.82E+00 | 1.34E-40 | 5.96E-39 |
| ENSG00000115738 | ID2      | 4.62E+00 | 1.41E-40 | 6.27E-39 |
| ENSG00000197766 | CFD      | 7.79E+00 | 1.64E-40 | 7.28E-39 |
| ENSG00000129991 | TNNI3    | 7.27E+00 | 1.86E-40 | 8.22E-39 |
| ENSG00000171401 | KRT13    | 1.05E+01 | 2.64E-40 | 1.16E-38 |
| ENSG00000078902 | TOLLIP   | 1.48E+00 | 3.10E-40 | 1.36E-38 |
| ENSG00000137699 | TRIM29   | 9.92E+00 | 3.43E-40 | 1.50E-38 |
| ENSG00000184502 | GAST     | 1.04E+01 | 3.87E-40 | 1.69E-38 |
| ENSG00000130402 | ACTN4    | 1.44E+00 | 6.71E-40 | 2.91E-38 |
| ENSG00000176393 | RNPEP    | 1.96E+00 | 7.00E-40 | 3.03E-38 |
| ENSG00000102901 | CENPT    | 1.70E+00 | 9.06E-40 | 3.92E-38 |
| ENSG00000115762 | PLEKHB2  | 1.52E+00 | 9.51E-40 | 4.10E-38 |

|                 |          |          |          |          |
|-----------------|----------|----------|----------|----------|
| ENSG00000185112 | FAM43A   | 2.43E+00 | 1.06E-39 | 4.55E-38 |
| ENSG00000119801 | YPEL5    | 2.06E+00 | 1.07E-39 | 4.59E-38 |
| ENSG00000117868 | ESYT2    | 1.59E+00 | 1.84E-39 | 7.85E-38 |
| ENSG00000104892 | KLC3     | 3.11E+00 | 1.95E-39 | 8.28E-38 |
| ENSG00000155158 | TTC39B   | 3.71E+00 | 2.00E-39 | 8.50E-38 |
| ENSG00000126822 | PLEKHG3  | 2.25E+00 | 2.09E-39 | 8.87E-38 |
| ENSG00000095203 | EPB41L4B | 3.79E+00 | 2.27E-39 | 9.59E-38 |
| ENSG00000225190 | PLEKHM1  | 2.67E+00 | 3.45E-39 | 1.44E-37 |
| ENSG00000274180 | NATD1    | 4.37E+00 | 3.94E-39 | 1.64E-37 |
| ENSG00000167487 | KLHL26   | 3.37E+00 | 4.43E-39 | 1.85E-37 |
| ENSG00000068383 | INPP5A   | 2.15E+00 | 7.40E-39 | 3.07E-37 |
| ENSG00000197386 | HTT      | 1.92E+00 | 7.55E-39 | 3.13E-37 |
| ENSG00000182606 | TRAK1    | 2.66E+00 | 8.85E-39 | 3.65E-37 |
| ENSG00000103056 | SMPD3    | 5.75E+00 | 9.60E-39 | 3.95E-37 |
| ENSG00000188910 | GJB3     | 7.49E+00 | 1.73E-38 | 7.09E-37 |
| ENSG00000187531 | SIRT7    | 2.08E+00 | 1.82E-38 | 7.43E-37 |
| ENSG00000178381 | ZFAND2A  | 2.83E+00 | 1.89E-38 | 7.72E-37 |
| ENSG00000174307 | PHLDA3   | 2.54E+00 | 2.31E-38 | 9.36E-37 |
| ENSG00000196361 | ELAVL3   | 4.75E+00 | 2.91E-38 | 1.18E-36 |
| ENSG00000124201 | ZNFX1    | 1.64E+00 | 2.94E-38 | 1.19E-36 |
| ENSG00000134308 | YWHAQ    | 1.12E+00 | 4.76E-38 | 1.91E-36 |
| ENSG00000161642 | ZNF385A  | 2.75E+00 | 9.84E-38 | 3.94E-36 |
| ENSG00000141577 | CEP131   | 2.49E+00 | 9.98E-38 | 3.99E-36 |
| ENSG00000139410 | SDSL     | 2.97E+00 | 1.02E-37 | 4.06E-36 |
| ENSG00000140368 | PSTPIP1  | 1.05E+01 | 1.04E-37 | 4.13E-36 |
| ENSG00000198736 | MSRB1    | 2.41E+00 | 1.14E-37 | 4.51E-36 |
| ENSG00000169403 | PTAFR    | 4.32E+00 | 1.17E-37 | 4.63E-36 |
| ENSG00000110076 | NRXN2    | 5.94E+00 | 1.51E-37 | 5.92E-36 |
| ENSG00000183255 | PTTG1IP  | 1.40E+00 | 1.57E-37 | 6.13E-36 |
| ENSG00000130656 | HBZ      | 1.05E+01 | 1.71E-37 | 6.68E-36 |
| ENSG00000197943 | PLCG2    | 4.78E+00 | 1.71E-37 | 6.68E-36 |
| ENSG00000096696 | DSP      | 2.97E+00 | 1.84E-37 | 7.16E-36 |
| ENSG00000123989 | CHPF     | 1.65E+00 | 2.07E-37 | 8.04E-36 |
| ENSG00000131389 | SLC6A6   | 1.91E+00 | 2.07E-37 | 8.04E-36 |
| ENSG00000159788 | RGS12    | 2.15E+00 | 2.38E-37 | 9.17E-36 |
| ENSG00000167757 | KLK11    | 9.98E+00 | 2.90E-37 | 1.11E-35 |
| ENSG00000114473 | IQCG     | 2.99E+00 | 3.05E-37 | 1.17E-35 |
| ENSG00000183044 | ABAT     | 4.26E+00 | 3.27E-37 | 1.25E-35 |
| ENSG00000186529 | CYP4F3   | 8.03E+00 | 3.57E-37 | 1.35E-35 |
| ENSG00000131196 | NFATC1   | 3.31E+00 | 4.79E-37 | 1.81E-35 |
| ENSG00000015413 | DPEP1    | 1.01E+01 | 4.91E-37 | 1.85E-35 |
| ENSG00000034152 | MAP2K3   | 1.27E+00 | 6.06E-37 | 2.28E-35 |
| ENSG00000161249 | DMKN     | 5.22E+00 | 1.03E-36 | 3.84E-35 |
| ENSG00000172005 | MAL      | 1.01E+01 | 1.30E-36 | 4.84E-35 |
| ENSG00000118640 | VAMP8    | 8.36E+00 | 1.38E-36 | 5.13E-35 |

|                 |          |          |          |          |
|-----------------|----------|----------|----------|----------|
| ENSG00000134317 | GRHL1    | 4.25E+00 | 1.44E-36 | 5.32E-35 |
| ENSG00000147689 | FAM83A   | 6.35E+00 | 1.52E-36 | 5.63E-35 |
| ENSG00000119630 | PGF      | 2.10E+00 | 1.58E-36 | 5.81E-35 |
| ENSG00000188015 | S100A3   | 3.59E+00 | 1.62E-36 | 5.95E-35 |
| ENSG00000078804 | TP53INP2 | 2.05E+00 | 1.96E-36 | 7.16E-35 |
| ENSG00000156671 | SAMD8    | 2.15E+00 | 2.13E-36 | 7.78E-35 |
| ENSG00000156453 | PCDH1    | 9.84E+00 | 2.25E-36 | 8.18E-35 |
| ENSG00000130703 | OSBPL2   | 1.76E+00 | 2.48E-36 | 8.99E-35 |
| ENSG00000174791 | RIN1     | 3.84E+00 | 2.55E-36 | 9.22E-35 |
| ENSG00000172613 | RAD9A    | 2.33E+00 | 2.62E-36 | 9.47E-35 |
| ENSG00000160753 | RUSC1    | 1.92E+00 | 3.23E-36 | 1.16E-34 |
| ENSG00000167114 | SLC27A4  | 1.57E+00 | 3.42E-36 | 1.22E-34 |
| ENSG00000157483 | MYO1E    | 1.90E+00 | 4.43E-36 | 1.58E-34 |
| ENSG00000136830 | NIBAN2   | 2.05E+00 | 4.95E-36 | 1.76E-34 |
| ENSG00000168993 | CPLX1    | 7.24E+00 | 4.96E-36 | 1.76E-34 |
| ENSG00000164236 | ANKRD33B | 2.35E+00 | 5.09E-36 | 1.80E-34 |
| ENSG00000204866 | IGFL2    | 7.35E+00 | 6.53E-36 | 2.31E-34 |
| ENSG00000108819 | PPP1R9B  | 1.71E+00 | 8.50E-36 | 2.99E-34 |
| ENSG00000108433 | GOSR2    | 1.42E+00 | 9.14E-36 | 3.20E-34 |
| ENSG00000197461 | PDGFA    | 1.94E+00 | 9.19E-36 | 3.22E-34 |
| ENSG00000179292 | TMEM151A | 4.86E+00 | 9.81E-36 | 3.43E-34 |
| ENSG00000205413 | SAMD9    | 2.56E+00 | 1.07E-35 | 3.72E-34 |
| ENSG00000104976 | SNAPC2   | 2.04E+00 | 1.09E-35 | 3.79E-34 |
| ENSG00000172478 | MAB21L4  | 9.97E+00 | 1.11E-35 | 3.86E-34 |
| ENSG00000124104 | SNX21    | 1.94E+00 | 1.20E-35 | 4.17E-34 |
| ENSG00000161714 | PLCD3    | 2.10E+00 | 1.31E-35 | 4.54E-34 |
| ENSG00000133985 | TTC9     | 5.47E+00 | 1.33E-35 | 4.58E-34 |
| ENSG00000135636 | DYSF     | 3.03E+00 | 1.39E-35 | 4.78E-34 |
| ENSG00000182325 | FBXL6    | 2.89E+00 | 3.12E-35 | 1.07E-33 |
| ENSG00000084234 | APLP2    | 1.56E+00 | 3.34E-35 | 1.15E-33 |
| ENSG00000182378 | PLCXD1   | 2.74E+00 | 3.74E-35 | 1.28E-33 |
| ENSG00000111981 | ULBP1    | 3.12E+00 | 4.05E-35 | 1.38E-33 |
| ENSG00000064961 | HMG20B   | 1.70E+00 | 4.06E-35 | 1.39E-33 |
| ENSG00000139626 | ITGB7    | 9.57E+00 | 4.38E-35 | 1.49E-33 |
| ENSG00000171368 | TPPP     | 6.37E+00 | 4.69E-35 | 1.59E-33 |
| ENSG00000179148 | ALOXE3   | 9.75E+00 | 5.70E-35 | 1.93E-33 |
| ENSG00000167748 | KLK1     | 9.74E+00 | 6.41E-35 | 2.16E-33 |
| ENSG00000014216 | CAPN1    | 2.02E+00 | 7.98E-35 | 2.68E-33 |
| ENSG00000167759 | KLK13    | 9.73E+00 | 1.51E-34 | 5.06E-33 |
| ENSG00000140320 | BAHD1    | 1.99E+00 | 1.57E-34 | 5.23E-33 |
| ENSG00000140832 | MARVELD3 | 1.02E+01 | 1.75E-34 | 5.85E-33 |
| ENSG00000142156 | COL6A1   | 1.63E+00 | 1.91E-34 | 6.36E-33 |
| ENSG00000196535 | MYO18A   | 2.49E+00 | 2.13E-34 | 7.04E-33 |
| ENSG00000178726 | THBD     | 3.19E+00 | 3.14E-34 | 1.04E-32 |
| ENSG00000013364 | MVP      | 3.14E+00 | 4.11E-34 | 1.35E-32 |

|                 |           |          |          |          |
|-----------------|-----------|----------|----------|----------|
| ENSG00000224259 | LINC01133 | 7.58E+00 | 7.44E-34 | 2.44E-32 |
| ENSG00000184640 | SEPTIN9   | 1.27E+00 | 7.90E-34 | 2.58E-32 |
| ENSG00000100592 | DAAM1     | 1.60E+00 | 8.50E-34 | 2.77E-32 |
| ENSG00000164877 | MICALL2   | 1.57E+00 | 1.03E-33 | 3.34E-32 |
| ENSG00000180900 | SCRIB     | 2.13E+00 | 1.04E-33 | 3.36E-32 |
| ENSG00000197380 | DACT3     | 3.74E+00 | 1.16E-33 | 3.75E-32 |
| ENSG00000177542 | SLC25A22  | 2.50E+00 | 1.26E-33 | 4.08E-32 |
| ENSG00000167110 | GOLGA2    | 1.80E+00 | 1.34E-33 | 4.33E-32 |
| ENSG00000111725 | PRKAB1    | 1.89E+00 | 1.49E-33 | 4.80E-32 |
| ENSG00000163286 | ALPG      | 9.36E+00 | 1.60E-33 | 5.15E-32 |
| ENSG00000261678 | SCRT1     | 9.58E+00 | 1.86E-33 | 5.94E-32 |
| ENSG00000130558 | OLFM1     | 5.52E+00 | 2.11E-33 | 6.72E-32 |
| ENSG00000130396 | AFDN      | 2.02E+00 | 2.22E-33 | 7.06E-32 |
| ENSG00000152377 | SPOCK1    | 2.71E+00 | 2.42E-33 | 7.68E-32 |
| ENSG00000275832 | ARHGAP23  | 1.86E+00 | 3.29E-33 | 1.04E-31 |
| ENSG00000163956 | LRPAP1    | 1.39E+00 | 4.64E-33 | 1.46E-31 |
| ENSG00000107736 | CDH23     | 5.01E+00 | 5.05E-33 | 1.58E-31 |
| ENSG00000160111 | CPAMD8    | 8.68E+00 | 5.42E-33 | 1.69E-31 |
| ENSG00000189319 | FAM53B    | 2.21E+00 | 5.46E-33 | 1.70E-31 |
| ENSG00000244509 | APOBEC3C  | 1.94E+00 | 7.86E-33 | 2.43E-31 |
| ENSG00000172354 | GNB2      | 1.34E+00 | 8.02E-33 | 2.48E-31 |
| ENSG00000095383 | TBC1D2    | 4.99E+00 | 8.86E-33 | 2.73E-31 |
| ENSG00000130720 | FIBCD1    | 5.33E+00 | 8.85E-33 | 2.73E-31 |
| ENSG00000076685 | NT5C2     | 1.77E+00 | 9.87E-33 | 3.03E-31 |
| ENSG00000183671 | GPR1      | 5.73E+00 | 9.92E-33 | 3.04E-31 |
| ENSG00000182326 | C1S       | 2.20E+00 | 1.13E-32 | 3.47E-31 |
| ENSG00000241839 | PLEKHO2   | 2.00E+00 | 1.15E-32 | 3.50E-31 |
| ENSG00000168528 | SERINC2   | 2.97E+00 | 1.15E-32 | 3.52E-31 |
| ENSG00000125775 | SDCBP2    | 3.58E+00 | 1.52E-32 | 4.62E-31 |
| ENSG00000101057 | MYBL2     | 1.32E+00 | 1.52E-32 | 4.62E-31 |
| ENSG00000138623 | SEMA7A    | 2.90E+00 | 2.20E-32 | 6.66E-31 |
| ENSG00000158106 | RHPN1     | 4.54E+00 | 2.35E-32 | 7.11E-31 |
| ENSG00000168792 | ABHD15    | 2.84E+00 | 2.44E-32 | 7.36E-31 |
| ENSG00000158246 | TENT5B    | 3.20E+00 | 3.24E-32 | 9.73E-31 |
| ENSG00000158747 | NBL1      | 2.40E+00 | 3.81E-32 | 1.14E-30 |
| ENSG00000136854 | STXBP1    | 2.51E+00 | 3.84E-32 | 1.15E-30 |
| ENSG00000139624 | CERS5     | 2.11E+00 | 4.21E-32 | 1.25E-30 |
| ENSG00000167771 | RCOR2     | 4.61E+00 | 6.11E-32 | 1.81E-30 |
| ENSG00000116213 | WRAP73    | 1.86E+00 | 6.31E-32 | 1.87E-30 |
| ENSG00000198719 | DLL1      | 4.80E+00 | 7.27E-32 | 2.15E-30 |
| ENSG00000162772 | ATF3      | 2.39E+00 | 7.79E-32 | 2.30E-30 |
| ENSG00000095932 | SMIM24    | 7.44E+00 | 8.27E-32 | 2.44E-30 |
| ENSG00000158089 | GALNT14   | 3.39E+00 | 8.99E-32 | 2.64E-30 |
| ENSG00000099804 | CDC34     | 2.36E+00 | 9.13E-32 | 2.68E-30 |
| ENSG00000134830 | C5AR2     | 9.33E+00 | 1.22E-31 | 3.56E-30 |

|                 |           |          |          |          |
|-----------------|-----------|----------|----------|----------|
| ENSG00000135679 | MDM2      | 1.78E+00 | 1.38E-31 | 4.02E-30 |
| ENSG00000168394 | TAP1      | 1.65E+00 | 1.89E-31 | 5.50E-30 |
| ENSG00000161835 | GRASP     | 4.62E+00 | 2.16E-31 | 6.28E-30 |
| ENSG00000204839 | MROH6     | 3.39E+00 | 2.69E-31 | 7.79E-30 |
| ENSG00000130052 | STARD8    | 4.68E+00 | 2.71E-31 | 7.82E-30 |
| ENSG00000126233 | SLURP1    | 1.01E+01 | 4.16E-31 | 1.20E-29 |
| ENSG00000101076 | HNF4A     | 9.14E+00 | 5.32E-31 | 1.53E-29 |
| ENSG00000114796 | KLHL24    | 2.71E+00 | 6.78E-31 | 1.94E-29 |
| ENSG00000148339 | SLC25A25  | 1.68E+00 | 8.14E-31 | 2.32E-29 |
| ENSG00000070081 | NUCB2     | 1.09E+00 | 8.33E-31 | 2.37E-29 |
| ENSG00000158825 | CDA       | 4.54E+00 | 8.44E-31 | 2.40E-29 |
| ENSG00000099849 | RASSF7    | 2.87E+00 | 9.04E-31 | 2.56E-29 |
| ENSG00000130724 | CHMP2A    | 2.01E+00 | 9.33E-31 | 2.64E-29 |
| ENSG00000081059 | TCF7      | 1.95E+00 | 9.72E-31 | 2.75E-29 |
| ENSG00000158792 | SPATA2L   | 2.42E+00 | 1.08E-30 | 3.05E-29 |
| ENSG00000133328 | PLAAT2    | 9.49E+00 | 1.16E-30 | 3.27E-29 |
| ENSG00000109079 | TNFAIP1   | 1.65E+00 | 1.23E-30 | 3.47E-29 |
| ENSG00000119782 | FKBP1B    | 4.25E+00 | 1.31E-30 | 3.68E-29 |
| ENSG00000184828 | ZBTB7C    | 8.85E+00 | 1.33E-30 | 3.72E-29 |
| ENSG00000188783 | PRELP     | 9.12E+00 | 1.48E-30 | 4.14E-29 |
| ENSG00000162729 | IGSF8     | 2.67E+00 | 1.52E-30 | 4.22E-29 |
| ENSG00000180176 | TH        | 9.14E+00 | 1.80E-30 | 5.02E-29 |
| ENSG00000138594 | TMOD3     | 1.14E+00 | 2.32E-30 | 6.44E-29 |
| ENSG00000237330 | RNF223    | 9.16E+00 | 2.52E-30 | 6.97E-29 |
| ENSG00000130669 | PAK4      | 1.25E+00 | 2.86E-30 | 7.89E-29 |
| ENSG00000167653 | PSCA      | 6.26E+00 | 3.22E-30 | 8.87E-29 |
| ENSG00000268621 | IGFL2-AS1 | 5.01E+00 | 3.58E-30 | 9.82E-29 |
| ENSG00000124762 | CDKN1A    | 1.54E+00 | 3.59E-30 | 9.85E-29 |
| ENSG00000095539 | SEMA4G    | 3.84E+00 | 3.82E-30 | 1.05E-28 |
| ENSG00000168994 | PXDC1     | 1.96E+00 | 4.06E-30 | 1.11E-28 |
| ENSG00000144485 | HES6      | 2.29E+00 | 4.12E-30 | 1.12E-28 |
| ENSG00000178882 | RFLNA     | 5.76E+00 | 4.13E-30 | 1.13E-28 |
| ENSG00000185963 | BICD2     | 1.33E+00 | 4.45E-30 | 1.21E-28 |
| ENSG00000179477 | ALOX12B   | 8.96E+00 | 4.61E-30 | 1.25E-28 |
| ENSG00000171551 | ECEL1     | 8.15E+00 | 4.99E-30 | 1.35E-28 |
| ENSG00000165684 | SNAPC4    | 1.37E+00 | 5.08E-30 | 1.37E-28 |
| ENSG00000118046 | STK11     | 1.76E+00 | 6.83E-30 | 1.84E-28 |
| ENSG00000131759 | RARA      | 1.59E+00 | 8.83E-30 | 2.37E-28 |
| ENSG00000183963 | SMTN      | 2.00E+00 | 8.92E-30 | 2.39E-28 |
| ENSG00000154930 | ACSS1     | 3.82E+00 | 8.94E-30 | 2.39E-28 |
| ENSG00000162572 | SCNN1D    | 4.14E+00 | 8.99E-30 | 2.40E-28 |
| ENSG00000271447 | MMP28     | 9.33E+00 | 9.00E-30 | 2.40E-28 |
| ENSG00000142319 | SLC6A3    | 9.06E+00 | 9.52E-30 | 2.54E-28 |
| ENSG00000066322 | ELOVL1    | 2.77E+00 | 1.09E-29 | 2.91E-28 |
| ENSG00000175416 | CLTB      | 2.92E+00 | 1.12E-29 | 2.97E-28 |

|                 |          |          |          |          |
|-----------------|----------|----------|----------|----------|
| ENSG00000103175 | WFDC1    | 8.56E+00 | 1.21E-29 | 3.22E-28 |
| ENSG00000135127 | BICDL1   | 4.56E+00 | 1.28E-29 | 3.39E-28 |
| ENSG00000144452 | ABCA12   | 7.16E+00 | 1.28E-29 | 3.40E-28 |
| ENSG00000169635 | HIC2     | 2.34E+00 | 1.34E-29 | 3.55E-28 |
| ENSG00000139219 | COL2A1   | 6.07E+00 | 1.49E-29 | 3.93E-28 |
| ENSG00000088367 | EPB41L1  | 2.29E+00 | 1.53E-29 | 4.02E-28 |
| ENSG00000100311 | PDGFB    | 3.47E+00 | 1.91E-29 | 5.00E-28 |
| ENSG00000134574 | DDB2     | 2.28E+00 | 2.16E-29 | 5.66E-28 |
| ENSG00000183077 | AFMID    | 2.14E+00 | 2.70E-29 | 7.05E-28 |
| ENSG00000072163 | LIMS2    | 3.39E+00 | 3.26E-29 | 8.50E-28 |
| ENSG00000117676 | RPS6KA1  | 2.27E+00 | 4.30E-29 | 1.12E-27 |
| ENSG00000179335 | CLK3     | 1.38E+00 | 4.88E-29 | 1.26E-27 |
| ENSG00000188522 | FAM83G   | 2.29E+00 | 5.19E-29 | 1.34E-27 |
| ENSG00000101439 | CST3     | 2.14E+00 | 5.30E-29 | 1.36E-27 |
| ENSG00000184584 | TMEM173  | 2.94E+00 | 7.58E-29 | 1.94E-27 |
| ENSG00000136068 | FLNB     | 1.63E+00 | 8.62E-29 | 2.19E-27 |
| ENSG00000109846 | CRYAB    | 8.30E+00 | 9.11E-29 | 2.31E-27 |
| ENSG00000124882 | EREG     | 5.92E+00 | 9.30E-29 | 2.36E-27 |
| ENSG00000159733 | ZFYVE28  | 8.43E+00 | 9.49E-29 | 2.40E-27 |
| ENSG00000100784 | RPS6KA5  | 2.37E+00 | 9.76E-29 | 2.46E-27 |
| ENSG00000136842 | TMOD1    | 5.03E+00 | 1.02E-28 | 2.56E-27 |
| ENSG00000186895 | FGF3     | 8.90E+00 | 1.09E-28 | 2.73E-27 |
| ENSG00000186111 | PIP5K1C  | 2.07E+00 | 1.12E-28 | 2.80E-27 |
| ENSG00000189433 | GJB4     | 9.02E+00 | 1.17E-28 | 2.92E-27 |
| ENSG00000187446 | CHP1     | 1.98E+00 | 1.23E-28 | 3.07E-27 |
| ENSG00000161243 | FBXO27   | 3.01E+00 | 1.24E-28 | 3.09E-27 |
| ENSG00000171954 | CYP4F22  | 8.74E+00 | 1.26E-28 | 3.14E-27 |
| ENSG00000187730 | GABRD    | 4.67E+00 | 1.26E-28 | 3.14E-27 |
| ENSG00000187800 | PEAR1    | 8.94E+00 | 1.28E-28 | 3.18E-27 |
| ENSG00000143537 | ADAM15   | 2.77E+00 | 1.30E-28 | 3.23E-27 |
| ENSG00000116690 | PRG4     | 9.10E+00 | 1.56E-28 | 3.84E-27 |
| ENSG00000074416 | MGLL     | 3.05E+00 | 1.65E-28 | 4.06E-27 |
| ENSG00000185988 | PLK5     | 8.78E+00 | 1.70E-28 | 4.17E-27 |
| ENSG00000167302 | TEPSIN   | 2.04E+00 | 1.76E-28 | 4.32E-27 |
| ENSG00000204538 | PSORS1C2 | 8.84E+00 | 2.08E-28 | 5.10E-27 |
| ENSG00000109321 | AREG     | 3.68E+00 | 2.26E-28 | 5.54E-27 |
| ENSG00000108669 | CYTH1    | 1.46E+00 | 2.49E-28 | 6.08E-27 |
| ENSG00000196116 | TDRD7    | 2.89E+00 | 2.52E-28 | 6.15E-27 |
| ENSG00000180155 | LYNX1    | 3.66E+00 | 2.89E-28 | 7.01E-27 |
| ENSG00000167646 | DNAAF3   | 5.13E+00 | 3.37E-28 | 8.16E-27 |
| ENSG00000066735 | KIF26A   | 3.16E+00 | 3.48E-28 | 8.38E-27 |
| ENSG00000164402 | SEPTIN8  | 1.57E+00 | 3.48E-28 | 8.38E-27 |
| ENSG00000198892 | SHISA4   | 2.77E+00 | 3.50E-28 | 8.41E-27 |
| ENSG00000101188 | NTSR1    | 6.29E+00 | 3.51E-28 | 8.42E-27 |
| ENSG00000001461 | NIPAL3   | 2.76E+00 | 3.76E-28 | 9.00E-27 |

|                 |           |          |          |          |
|-----------------|-----------|----------|----------|----------|
| ENSG00000176454 | LPCAT4    | 2.59E+00 | 4.05E-28 | 9.68E-27 |
| ENSG00000215712 | TMEM242   | 1.73E+00 | 4.09E-28 | 9.75E-27 |
| ENSG00000013288 | MAN2B2    | 2.30E+00 | 4.09E-28 | 9.76E-27 |
| ENSG00000104267 | CA2       | 7.49E+00 | 4.73E-28 | 1.13E-26 |
| ENSG00000058404 | CAMK2B    | 5.47E+00 | 5.48E-28 | 1.30E-26 |
| ENSG00000148357 | HMCN2     | 9.01E+00 | 5.54E-28 | 1.31E-26 |
| ENSG00000182220 | ATP6AP2   | 1.16E+00 | 5.89E-28 | 1.40E-26 |
| ENSG00000223802 | CERS1     | 2.09E+00 | 5.91E-28 | 1.40E-26 |
| ENSG00000197077 | KIAA1671  | 2.65E+00 | 6.21E-28 | 1.47E-26 |
| ENSG00000106789 | CORO2A    | 3.57E+00 | 8.25E-28 | 1.94E-26 |
| ENSG00000130529 | TRPM4     | 2.97E+00 | 9.13E-28 | 2.15E-26 |
| ENSG00000131019 | ULBP3     | 1.78E+00 | 1.03E-27 | 2.41E-26 |
| ENSG00000158186 | MRAS      | 2.49E+00 | 1.08E-27 | 2.54E-26 |
| ENSG00000181652 | ATG9B     | 8.71E+00 | 1.12E-27 | 2.61E-26 |
| ENSG00000116198 | CEP104    | 1.44E+00 | 1.18E-27 | 2.75E-26 |
| ENSG00000176092 | CRYBG2    | 4.14E+00 | 1.25E-27 | 2.90E-26 |
| ENSG00000161682 | FAM171A2  | 2.77E+00 | 1.34E-27 | 3.12E-26 |
| ENSG00000099617 | EFNA2     | 4.21E+00 | 1.67E-27 | 3.86E-26 |
| ENSG00000160213 | CSTB      | 2.47E+00 | 1.66E-27 | 3.86E-26 |
| ENSG00000181191 | PJA1      | 2.06E+00 | 1.66E-27 | 3.86E-26 |
| ENSG00000206075 | SERPINB5  | 8.81E+00 | 2.28E-27 | 5.24E-26 |
| ENSG00000197353 | LYPD2     | 8.93E+00 | 2.28E-27 | 5.25E-26 |
| ENSG00000136717 | BIN1      | 1.79E+00 | 2.31E-27 | 5.31E-26 |
| ENSG00000196415 | PRTN3     | 8.80E+00 | 2.35E-27 | 5.39E-26 |
| ENSG00000137474 | MYO7A     | 8.86E+00 | 2.78E-27 | 6.35E-26 |
| ENSG00000074964 | ARHGEF10L | 3.08E+00 | 2.94E-27 | 6.70E-26 |
| ENSG00000125378 | BMP4      | 3.16E+00 | 3.19E-27 | 7.25E-26 |
| ENSG00000143367 | TUFT1     | 2.31E+00 | 3.46E-27 | 7.86E-26 |
| ENSG00000165949 | IFI27     | 5.35E+00 | 3.49E-27 | 7.92E-26 |
| ENSG00000060656 | PTPRU     | 4.04E+00 | 3.56E-27 | 8.07E-26 |
| ENSG00000167705 | RILP      | 3.03E+00 | 3.57E-27 | 8.07E-26 |
| ENSG00000130635 | COL5A1    | 1.80E+00 | 4.24E-27 | 9.56E-26 |
| ENSG00000170100 | ZNF778    | 1.81E+00 | 5.21E-27 | 1.17E-25 |
| ENSG00000138496 | PARP9     | 2.43E+00 | 5.28E-27 | 1.19E-25 |
| ENSG00000131149 | GSE1      | 1.83E+00 | 5.48E-27 | 1.23E-25 |
| ENSG00000080644 | CHRNA3    | 8.32E+00 | 5.74E-27 | 1.29E-25 |
| ENSG00000198959 | TGM2      | 3.20E+00 | 6.20E-27 | 1.39E-25 |
| ENSG00000181045 | SLC26A11  | 2.80E+00 | 7.32E-27 | 1.64E-25 |
| ENSG00000164237 | CMBL      | 2.27E+00 | 7.61E-27 | 1.70E-25 |
| ENSG00000087253 | LPCAT2    | 2.59E+00 | 7.86E-27 | 1.75E-25 |
| ENSG00000175130 | MARCKSL1  | 1.35E+00 | 9.10E-27 | 2.02E-25 |
| ENSG00000129194 | SOX15     | 6.78E+00 | 9.72E-27 | 2.16E-25 |
| ENSG00000102034 | ELF4      | 1.47E+00 | 1.01E-26 | 2.25E-25 |
| ENSG00000196557 | CACNA1H   | 5.74E+00 | 1.02E-26 | 2.27E-25 |
| ENSG00000186081 | KRT5      | 8.89E+00 | 1.10E-26 | 2.44E-25 |

|                 |          |          |          |          |
|-----------------|----------|----------|----------|----------|
| ENSG00000167962 | ZNF598   | 1.14E+00 | 1.17E-26 | 2.57E-25 |
| ENSG00000137843 | PAK6     | 6.12E+00 | 1.35E-26 | 2.98E-25 |
| ENSG00000163083 | INHBB    | 3.54E+00 | 1.38E-26 | 3.03E-25 |
| ENSG00000206077 | ZDHHC11B | 8.77E+00 | 1.43E-26 | 3.14E-25 |
| ENSG00000141750 | STAC2    | 3.35E+00 | 1.48E-26 | 3.25E-25 |
| ENSG00000189001 | SBSN     | 7.56E+00 | 1.61E-26 | 3.52E-25 |
| ENSG00000176953 | NFATC2IP | 1.30E+00 | 1.63E-26 | 3.57E-25 |
| ENSG00000107140 | TESK1    | 1.88E+00 | 1.66E-26 | 3.64E-25 |
| ENSG00000197119 | SLC25A29 | 2.10E+00 | 1.95E-26 | 4.24E-25 |
| ENSG00000106992 | AK1      | 2.24E+00 | 1.96E-26 | 4.25E-25 |
| ENSG00000166311 | SMPD1    | 1.94E+00 | 1.99E-26 | 4.31E-25 |
| ENSG00000160570 | DEDD2    | 1.64E+00 | 2.32E-26 | 5.03E-25 |
| ENSG00000204421 | LY6G6C   | 6.99E+00 | 2.73E-26 | 5.91E-25 |
| ENSG00000006125 | AP2B1    | 1.42E+00 | 2.87E-26 | 6.21E-25 |
| ENSG00000166908 | PIP4K2C  | 1.91E+00 | 2.92E-26 | 6.31E-25 |
| ENSG00000013563 | DNASE1L1 | 3.44E+00 | 2.98E-26 | 6.43E-25 |
| ENSG00000268041 | ERFL     | 4.81E+00 | 3.26E-26 | 7.02E-25 |
| ENSG00000161992 | PRR35    | 8.56E+00 | 3.82E-26 | 8.22E-25 |
| ENSG00000173762 | CD7      | 6.29E+00 | 4.03E-26 | 8.64E-25 |
| ENSG00000189334 | S100A14  | 8.18E+00 | 5.13E-26 | 1.10E-24 |
| ENSG00000031698 | SARS     | 1.07E+00 | 5.66E-26 | 1.21E-24 |
| ENSG00000171403 | KRT9     | 8.66E+00 | 5.68E-26 | 1.21E-24 |
| ENSG00000196208 | GREB1    | 4.87E+00 | 6.55E-26 | 1.39E-24 |
| ENSG00000115685 | PPP1R7   | 1.55E+00 | 8.79E-26 | 1.86E-24 |
| ENSG00000184371 | CSF1     | 1.80E+00 | 9.90E-26 | 2.09E-24 |
| ENSG00000064687 | ABCA7    | 3.67E+00 | 1.04E-25 | 2.19E-24 |
| ENSG00000130940 | CASZ1    | 3.67E+00 | 1.05E-25 | 2.21E-24 |
| ENSG00000145107 | TM4SF19  | 6.82E+00 | 1.10E-25 | 2.32E-24 |
| ENSG00000085185 | BCORL1   | 2.52E+00 | 1.16E-25 | 2.44E-24 |
| ENSG00000138814 | PPP3CA   | 1.09E+00 | 1.35E-25 | 2.83E-24 |
| ENSG00000161533 | ACOX1    | 1.60E+00 | 1.39E-25 | 2.91E-24 |
| ENSG00000138069 | RAB1A    | 1.10E+00 | 1.82E-25 | 3.78E-24 |
| ENSG00000161513 | FDXR     | 1.82E+00 | 2.23E-25 | 4.59E-24 |
| ENSG00000080546 | SESN1    | 2.33E+00 | 2.36E-25 | 4.85E-24 |
| ENSG00000101000 | PROCR    | 2.65E+00 | 2.86E-25 | 5.88E-24 |
| ENSG00000136950 | ARPC5L   | 1.09E+00 | 2.94E-25 | 6.03E-24 |
| ENSG00000080854 | IGSF9B   | 4.54E+00 | 3.16E-25 | 6.48E-24 |
| ENSG00000117472 | TSPAN1   | 8.94E+00 | 3.17E-25 | 6.48E-24 |
| ENSG00000105370 | LIM2     | 8.43E+00 | 3.25E-25 | 6.63E-24 |
| ENSG00000185955 | C7orf61  | 4.58E+00 | 3.64E-25 | 7.41E-24 |
| ENSG00000177303 | CASKIN2  | 2.26E+00 | 4.09E-25 | 8.30E-24 |
| ENSG00000186474 | KLK12    | 8.46E+00 | 4.86E-25 | 9.85E-24 |
| ENSG00000151348 | EXT2     | 1.17E+00 | 4.89E-25 | 9.90E-24 |
| ENSG00000189120 | SP6      | 3.47E+00 | 4.95E-25 | 9.99E-24 |
| ENSG00000010319 | SEMA3G   | 7.15E+00 | 5.24E-25 | 1.06E-23 |



|                 |          |          |          |          |
|-----------------|----------|----------|----------|----------|
| ENSG00000130592 | LSP1     | 7.65E+00 | 5.77E-25 | 1.16E-23 |
| ENSG00000125734 | GPR108   | 1.88E+00 | 7.21E-25 | 1.45E-23 |
| ENSG00000109099 | PMP22    | 1.39E+00 | 7.58E-25 | 1.52E-23 |
| ENSG00000116688 | MFN2     | 1.09E+00 | 7.95E-25 | 1.59E-23 |
| ENSG00000132000 | PODNL1   | 3.43E+00 | 9.67E-25 | 1.93E-23 |
| ENSG00000155363 | MOV10    | 1.19E+00 | 9.76E-25 | 1.95E-23 |
| ENSG00000137171 | KLC4     | 2.27E+00 | 1.16E-24 | 2.30E-23 |
| ENSG00000082996 | RNF13    | 1.90E+00 | 1.24E-24 | 2.46E-23 |
| ENSG00000065361 | ERBB3    | 4.40E+00 | 1.30E-24 | 2.58E-23 |
| ENSG00000127585 | FBXL16   | 6.48E+00 | 1.42E-24 | 2.82E-23 |
| ENSG00000067606 | PRKCZ    | 2.00E+00 | 1.57E-24 | 3.10E-23 |
| ENSG00000096433 | ITPR3    | 1.89E+00 | 1.58E-24 | 3.11E-23 |
| ENSG00000183196 | CHST6    | 3.52E+00 | 1.58E-24 | 3.11E-23 |
| ENSG00000076928 | ARHGEF1  | 1.39E+00 | 1.71E-24 | 3.36E-23 |
| ENSG00000213047 | DENND1B  | 2.60E+00 | 1.73E-24 | 3.40E-23 |
| ENSG00000128923 | MINDY2   | 1.85E+00 | 1.80E-24 | 3.53E-23 |
| ENSG00000135916 | ITM2C    | 1.17E+00 | 1.81E-24 | 3.55E-23 |
| ENSG00000160932 | LY6E     | 2.46E+00 | 2.14E-24 | 4.18E-23 |
| ENSG00000100439 | ABHD4    | 1.97E+00 | 2.31E-24 | 4.50E-23 |
| ENSG00000180758 | GPR157   | 2.40E+00 | 2.63E-24 | 5.10E-23 |
| ENSG00000170893 | TRH      | 9.19E+00 | 2.67E-24 | 5.18E-23 |
| ENSG00000175264 | CHST1    | 3.64E+00 | 2.90E-24 | 5.62E-23 |
| ENSG00000136153 | LMO7     | 1.57E+00 | 2.92E-24 | 5.65E-23 |
| ENSG00000109670 | FBXW7    | 1.23E+00 | 2.98E-24 | 5.76E-23 |
| ENSG00000173846 | PLK3     | 1.97E+00 | 3.45E-24 | 6.65E-23 |
| ENSG00000159388 | BTG2     | 2.10E+00 | 3.68E-24 | 7.07E-23 |
| ENSG00000141644 | MBD1     | 1.24E+00 | 3.99E-24 | 7.65E-23 |
| ENSG00000157637 | SLC38A10 | 1.40E+00 | 4.08E-24 | 7.82E-23 |
| ENSG00000010310 | GIPR     | 8.09E+00 | 4.15E-24 | 7.94E-23 |
| ENSG00000189114 | BLOC1S3  | 1.99E+00 | 4.43E-24 | 8.46E-23 |
| ENSG00000117266 | CDK18    | 4.30E+00 | 4.61E-24 | 8.79E-23 |
| ENSG00000189280 | GJB5     | 8.31E+00 | 4.63E-24 | 8.81E-23 |
| ENSG00000124493 | GRM4     | 7.79E+00 | 4.77E-24 | 9.08E-23 |
| ENSG00000164300 | SERINC5  | 2.86E+00 | 5.06E-24 | 9.61E-23 |
| ENSG00000196586 | MYO6     | 1.85E+00 | 6.01E-24 | 1.14E-22 |
| ENSG00000131042 | LILRB2   | 8.40E+00 | 6.96E-24 | 1.31E-22 |
| ENSG00000122507 | BBS9     | 3.06E+00 | 7.59E-24 | 1.43E-22 |
| ENSG00000128564 | VGF      | 2.54E+00 | 7.77E-24 | 1.46E-22 |
| ENSG00000257704 | INAFM1   | 1.50E+00 | 8.86E-24 | 1.66E-22 |
| ENSG00000068078 | FGFR3    | 2.04E+00 | 9.27E-24 | 1.73E-22 |
| ENSG00000139116 | KIF21A   | 1.97E+00 | 9.83E-24 | 1.84E-22 |
| ENSG00000107679 | PLEKHA1  | 1.62E+00 | 9.98E-24 | 1.86E-22 |
| ENSG00000128335 | APOL2    | 1.64E+00 | 1.04E-23 | 1.94E-22 |
| ENSG00000163283 | ALPP     | 8.02E+00 | 1.12E-23 | 2.09E-22 |
| ENSG00000168389 | MFSD2A   | 1.44E+00 | 1.15E-23 | 2.13E-22 |

|                 |          |          |          |          |
|-----------------|----------|----------|----------|----------|
| ENSG00000157216 | SSBP3    | 1.58E+00 | 1.42E-23 | 2.62E-22 |
| ENSG00000166592 | RRAD     | 1.64E+00 | 1.44E-23 | 2.66E-22 |
| ENSG00000131873 | CHSY1    | 1.60E+00 | 1.49E-23 | 2.75E-22 |
| ENSG00000077463 | SIRT6    | 2.32E+00 | 1.55E-23 | 2.85E-22 |
| ENSG00000124920 | MYRF     | 3.27E+00 | 1.61E-23 | 2.97E-22 |
| ENSG00000167699 | GLOD4    | 1.03E+00 | 1.62E-23 | 2.97E-22 |
| ENSG00000130193 | THEM6    | 2.48E+00 | 1.66E-23 | 3.05E-22 |
| ENSG00000221890 | NPTXR    | 2.12E+00 | 1.82E-23 | 3.33E-22 |
| ENSG00000137440 | FGFBP1   | 8.08E+00 | 1.85E-23 | 3.39E-22 |
| ENSG00000121552 | CSTA     | 4.73E+00 | 1.97E-23 | 3.60E-22 |
| ENSG00000159674 | SPON2    | 8.95E+00 | 2.00E-23 | 3.65E-22 |
| ENSG00000140470 | ADAMTS17 | 5.22E+00 | 2.11E-23 | 3.84E-22 |
| ENSG00000181218 | HIST3H2A | 2.56E+00 | 2.12E-23 | 3.86E-22 |
| ENSG00000100744 | GSKIP    | 2.15E+00 | 2.57E-23 | 4.67E-22 |
| ENSG00000184164 | CRELD2   | 1.01E+00 | 2.65E-23 | 4.80E-22 |
| ENSG00000140297 | GCNT3    | 8.23E+00 | 3.11E-23 | 5.62E-22 |
| ENSG00000156026 | MCU      | 1.45E+00 | 3.24E-23 | 5.85E-22 |
| ENSG00000112305 | SMAP1    | 1.27E+00 | 3.25E-23 | 5.86E-22 |
| ENSG00000164266 | SPINK1   | 8.56E+00 | 3.46E-23 | 6.23E-22 |
| ENSG00000234465 | PINLYP   | 5.67E+00 | 3.74E-23 | 6.72E-22 |
| ENSG00000162104 | ADCY9    | 2.31E+00 | 4.16E-23 | 7.47E-22 |
| ENSG00000126705 | AHDC1    | 1.76E+00 | 4.53E-23 | 8.12E-22 |
| ENSG00000162344 | FGF19    | 8.08E+00 | 4.82E-23 | 8.63E-22 |
| ENSG00000168556 | ING2     | 1.23E+00 | 4.90E-23 | 8.76E-22 |
| ENSG00000165632 | TAF3     | 1.55E+00 | 5.05E-23 | 9.02E-22 |
| ENSG00000105664 | COMP     | 6.67E+00 | 5.18E-23 | 9.25E-22 |
| ENSG00000189143 | CLDN4    | 5.42E+00 | 5.26E-23 | 9.38E-22 |
| ENSG00000136003 | ISCU     | 1.55E+00 | 5.57E-23 | 9.93E-22 |
| ENSG00000163191 | S100A11  | 1.97E+00 | 5.71E-23 | 1.02E-21 |
| ENSG00000006611 | USH1C    | 7.73E+00 | 6.55E-23 | 1.16E-21 |
| ENSG00000186517 | ARHGAP30 | 6.23E+00 | 7.02E-23 | 1.25E-21 |
| ENSG00000161011 | SQSTM1   | 1.20E+00 | 7.05E-23 | 1.25E-21 |
| ENSG00000149485 | FADS1    | 1.18E+00 | 7.30E-23 | 1.29E-21 |
| ENSG00000170421 | KRT8     | 2.37E+00 | 8.10E-23 | 1.43E-21 |
| ENSG00000091592 | NLRP1    | 3.35E+00 | 8.33E-23 | 1.47E-21 |
| ENSG00000087245 | MMP2     | 1.98E+00 | 8.89E-23 | 1.56E-21 |
| ENSG00000142669 | SH3BGRL3 | 1.62E+00 | 9.18E-23 | 1.61E-21 |
| ENSG00000144711 | IQSEC1   | 1.85E+00 | 1.05E-22 | 1.84E-21 |
| ENSG00000178950 | GAK      | 1.48E+00 | 1.14E-22 | 1.99E-21 |
| ENSG00000188070 | C11orf95 | 2.20E+00 | 1.26E-22 | 2.18E-21 |
| ENSG00000171813 | PWWP2B   | 2.57E+00 | 1.27E-22 | 2.21E-21 |
| ENSG00000188811 | NHLRC3   | 2.58E+00 | 1.30E-22 | 2.25E-21 |
| ENSG00000135047 | CTSL     | 1.17E+00 | 1.32E-22 | 2.28E-21 |
| ENSG00000204542 | C6orf15  | 8.34E+00 | 1.32E-22 | 2.29E-21 |
| ENSG00000129538 | RNASE1   | 8.07E+00 | 1.34E-22 | 2.32E-21 |

|                 |           |          |          |          |
|-----------------|-----------|----------|----------|----------|
| ENSG00000050165 | DKK3      | 1.55E+00 | 1.36E-22 | 2.36E-21 |
| ENSG00000048392 | RRM2B     | 1.87E+00 | 1.48E-22 | 2.54E-21 |
| ENSG00000068697 | LAPTM4A   | 1.32E+00 | 1.64E-22 | 2.82E-21 |
| ENSG00000132561 | MATN2     | 1.92E+00 | 1.97E-22 | 3.37E-21 |
| ENSG00000196975 | ANXA4     | 1.55E+00 | 1.97E-22 | 3.38E-21 |
| ENSG00000116014 | KISS1R    | 7.93E+00 | 2.00E-22 | 3.43E-21 |
| ENSG00000131018 | SYNE1     | 2.44E+00 | 2.05E-22 | 3.50E-21 |
| ENSG00000164086 | DUSP7     | 1.20E+00 | 2.16E-22 | 3.68E-21 |
| ENSG00000143850 | PLEKHA6   | 7.41E+00 | 2.25E-22 | 3.82E-21 |
| ENSG00000100523 | DDHD1     | 2.01E+00 | 2.33E-22 | 3.96E-21 |
| ENSG00000105376 | ICAM5     | 3.54E+00 | 3.49E-22 | 5.90E-21 |
| ENSG00000163501 | IHH       | 6.54E+00 | 3.51E-22 | 5.92E-21 |
| ENSG00000135924 | DNAJB2    | 1.34E+00 | 3.55E-22 | 5.98E-21 |
| ENSG00000100647 | SUSD6     | 1.68E+00 | 3.63E-22 | 6.11E-21 |
| ENSG00000171747 | LGALS4    | 8.11E+00 | 3.70E-22 | 6.23E-21 |
| ENSG00000012223 | LTF       | 8.08E+00 | 4.06E-22 | 6.81E-21 |
| ENSG00000123983 | ACSL3     | 1.09E+00 | 4.17E-22 | 6.99E-21 |
| ENSG00000180914 | OXTR      | 2.17E+00 | 4.60E-22 | 7.69E-21 |
| ENSG00000184160 | ADRA2C    | 4.74E+00 | 4.77E-22 | 7.97E-21 |
| ENSG00000130294 | KIF1A     | 8.03E+00 | 5.26E-22 | 8.78E-21 |
| ENSG00000132470 | ITGB4     | 5.27E+00 | 6.06E-22 | 1.01E-20 |
| ENSG00000099834 | CDHR5     | 8.00E+00 | 6.29E-22 | 1.05E-20 |
| ENSG00000175938 | ORAI3     | 3.40E+00 | 6.54E-22 | 1.09E-20 |
| ENSG00000100427 | MLC1      | 7.91E+00 | 7.93E-22 | 1.32E-20 |
| ENSG00000120885 | CLU       | 1.36E+00 | 7.96E-22 | 1.32E-20 |
| ENSG00000213672 | NCKIPSD   | 1.58E+00 | 8.43E-22 | 1.39E-20 |
| ENSG00000170734 | POLH      | 1.83E+00 | 8.50E-22 | 1.41E-20 |
| ENSG00000185950 | IRS2      | 2.34E+00 | 8.54E-22 | 1.41E-20 |
| ENSG00000112659 | CUL9      | 2.76E+00 | 8.77E-22 | 1.45E-20 |
| ENSG00000182173 | TSEN54    | 1.33E+00 | 9.40E-22 | 1.55E-20 |
| ENSG00000128016 | ZFP36     | 2.77E+00 | 9.74E-22 | 1.60E-20 |
| ENSG00000139722 | VPS37B    | 1.25E+00 | 1.12E-21 | 1.84E-20 |
| ENSG00000237512 | UNC5B-AS1 | 5.49E+00 | 1.23E-21 | 2.02E-20 |
| ENSG00000100596 | SPTLC2    | 1.39E+00 | 1.26E-21 | 2.06E-20 |
| ENSG00000103066 | PLA2G15   | 1.67E+00 | 1.33E-21 | 2.18E-20 |
| ENSG00000168938 | PPIC      | 1.54E+00 | 1.36E-21 | 2.21E-20 |
| ENSG00000186350 | RXRA      | 1.83E+00 | 1.36E-21 | 2.22E-20 |
| ENSG00000151693 | ASAP2     | 1.61E+00 | 1.41E-21 | 2.30E-20 |
| ENSG00000115266 | APC2      | 4.91E+00 | 1.48E-21 | 2.41E-20 |
| ENSG00000140199 | SLC12A6   | 2.45E+00 | 1.51E-21 | 2.46E-20 |
| ENSG00000065613 | SLK       | 1.40E+00 | 1.53E-21 | 2.48E-20 |
| ENSG00000163499 | CRYBA2    | 5.28E+00 | 1.53E-21 | 2.49E-20 |
| ENSG00000108511 | HOXB6     | 2.07E+00 | 1.83E-21 | 2.96E-20 |
| ENSG00000176153 | GPX2      | 7.95E+00 | 1.84E-21 | 2.98E-20 |
| ENSG00000177508 | IRX3      | 1.89E+00 | 1.92E-21 | 3.11E-20 |

|                 |           |          |          |          |
|-----------------|-----------|----------|----------|----------|
| ENSG00000101096 | NFATC2    | 3.09E+00 | 1.95E-21 | 3.15E-20 |
| ENSG00000175155 | YPEL2     | 3.58E+00 | 1.97E-21 | 3.18E-20 |
| ENSG00000172890 | NADSYN1   | 2.17E+00 | 1.98E-21 | 3.19E-20 |
| ENSG00000141580 | WDR45B    | 1.25E+00 | 2.04E-21 | 3.29E-20 |
| ENSG00000160209 | PDXK      | 1.44E+00 | 2.16E-21 | 3.48E-20 |
| ENSG00000131746 | TNS4      | 8.19E+00 | 2.26E-21 | 3.63E-20 |
| ENSG00000122359 | ANXA11    | 1.48E+00 | 2.40E-21 | 3.86E-20 |
| ENSG00000109107 | ALDOC     | 5.41E+00 | 2.41E-21 | 3.87E-20 |
| ENSG00000137975 | CLCA2     | 4.72E+00 | 2.43E-21 | 3.90E-20 |
| ENSG00000142765 | SYTL1     | 4.98E+00 | 2.85E-21 | 4.56E-20 |
| ENSG00000005700 | IBTK      | 1.31E+00 | 2.94E-21 | 4.71E-20 |
| ENSG00000091409 | ITGA6     | 2.36E+00 | 3.05E-21 | 4.89E-20 |
| ENSG00000158373 | HIST1H2BD | 2.04E+00 | 3.36E-21 | 5.37E-20 |
| ENSG00000179833 | SERTAD2   | 1.51E+00 | 3.53E-21 | 5.63E-20 |
| ENSG00000141574 | SECTM1    | 4.54E+00 | 3.59E-21 | 5.73E-20 |
| ENSG00000114771 | AADAC     | 2.49E+00 | 3.60E-21 | 5.73E-20 |
| ENSG00000185479 | KRT6B     | 7.99E+00 | 3.84E-21 | 6.11E-20 |
| ENSG00000068903 | SIRT2     | 1.75E+00 | 3.91E-21 | 6.22E-20 |
| ENSG00000005238 | FAM214B   | 3.33E+00 | 4.35E-21 | 6.91E-20 |
| ENSG00000197063 | MAFG      | 1.25E+00 | 4.40E-21 | 6.99E-20 |
| ENSG00000134108 | ARL8B     | 1.00E+00 | 4.55E-21 | 7.20E-20 |
| ENSG00000101204 | CHRNA4    | 7.78E+00 | 4.62E-21 | 7.30E-20 |
| ENSG00000136867 | SLC31A2   | 2.27E+00 | 5.25E-21 | 8.28E-20 |
| ENSG00000140323 | DISP2     | 5.47E+00 | 5.67E-21 | 8.94E-20 |
| ENSG00000124313 | IQSEC2    | 2.71E+00 | 6.38E-21 | 1.00E-19 |
| ENSG00000130762 | ARHGEF16  | 3.21E+00 | 6.60E-21 | 1.04E-19 |
| ENSG00000167306 | MYO5B     | 4.00E+00 | 7.16E-21 | 1.12E-19 |
| ENSG00000177374 | HIC1      | 2.35E+00 | 8.05E-21 | 1.26E-19 |
| ENSG00000077009 | NMRK2     | 8.12E+00 | 8.64E-21 | 1.35E-19 |
| ENSG00000085063 | CD59      | 1.07E+00 | 8.87E-21 | 1.39E-19 |
| ENSG00000158055 | GRHL3     | 7.16E+00 | 9.26E-21 | 1.45E-19 |
| ENSG00000005513 | SOX8      | 7.95E+00 | 9.61E-21 | 1.50E-19 |
| ENSG00000182795 | C1orf116  | 7.67E+00 | 9.61E-21 | 1.50E-19 |
| ENSG00000170855 | TRIAP1    | 1.35E+00 | 9.84E-21 | 1.53E-19 |
| ENSG00000205277 | MUC12     | 5.41E+00 | 1.05E-20 | 1.63E-19 |
| ENSG00000151689 | INPP1     | 1.72E+00 | 1.08E-20 | 1.67E-19 |
| ENSG00000175121 | WFDC5     | 8.01E+00 | 1.24E-20 | 1.93E-19 |
| ENSG00000105559 | PLEKHA4   | 2.14E+00 | 1.25E-20 | 1.93E-19 |
| ENSG00000162909 | CAPN2     | 1.19E+00 | 1.30E-20 | 2.00E-19 |
| ENSG00000138271 | GPR87     | 4.19E+00 | 1.58E-20 | 2.43E-19 |
| ENSG00000105281 | SLC1A5    | 1.20E+00 | 1.60E-20 | 2.45E-19 |
| ENSG00000155744 | FAM126B   | 2.02E+00 | 1.85E-20 | 2.83E-19 |
| ENSG00000186810 | CXCR3     | 7.83E+00 | 1.86E-20 | 2.85E-19 |
| ENSG00000107821 | KAZALD1   | 3.21E+00 | 1.96E-20 | 2.99E-19 |
| ENSG00000197747 | S100A10   | 1.24E+00 | 2.15E-20 | 3.28E-19 |

|                 |            |          |          |          |
|-----------------|------------|----------|----------|----------|
| ENSG00000083937 | CHMP2B     | 1.18E+00 | 2.31E-20 | 3.52E-19 |
| ENSG00000132879 | FBXO44     | 2.26E+00 | 2.41E-20 | 3.68E-19 |
| ENSG00000135046 | ANXA1      | 1.76E+00 | 2.83E-20 | 4.29E-19 |
| ENSG00000160360 | GPSM1      | 1.63E+00 | 2.83E-20 | 4.29E-19 |
| ENSG00000092964 | DPYSL2     | 1.05E+00 | 2.89E-20 | 4.39E-19 |
| ENSG00000110697 | PITPNM1    | 1.76E+00 | 2.94E-20 | 4.45E-19 |
| ENSG00000130560 | UBAC1      | 1.55E+00 | 3.41E-20 | 5.16E-19 |
| ENSG00000168300 | PCMTD1     | 1.80E+00 | 3.62E-20 | 5.46E-19 |
| ENSG00000166558 | SLC38A8    | 7.35E+00 | 3.71E-20 | 5.58E-19 |
| ENSG00000110092 | CCND1      | 1.62E+00 | 3.79E-20 | 5.70E-19 |
| ENSG00000101134 | DOK5       | 7.67E+00 | 3.85E-20 | 5.79E-19 |
| ENSG00000110619 | CARS       | 1.23E+00 | 3.94E-20 | 5.92E-19 |
| ENSG00000173404 | INSM1      | 7.55E+00 | 3.97E-20 | 5.96E-19 |
| ENSG00000164853 | UNCX       | 8.01E+00 | 4.00E-20 | 6.00E-19 |
| ENSG00000100346 | CACNA1I    | 7.72E+00 | 4.01E-20 | 6.01E-19 |
| ENSG00000159363 | ATP13A2    | 2.07E+00 | 4.27E-20 | 6.38E-19 |
| ENSG00000133056 | PIK3C2B    | 3.16E+00 | 4.51E-20 | 6.74E-19 |
| ENSG00000104228 | TRIM35     | 1.92E+00 | 4.88E-20 | 7.28E-19 |
| ENSG00000198715 | GLMP       | 1.90E+00 | 5.42E-20 | 8.05E-19 |
| ENSG00000161638 | ITGA5      | 1.55E+00 | 6.03E-20 | 8.95E-19 |
| ENSG00000171552 | BCL2L1     | 1.38E+00 | 6.05E-20 | 8.98E-19 |
| ENSG00000135932 | CAB39      | 1.09E+00 | 6.68E-20 | 9.88E-19 |
| ENSG00000172818 | OVOL1      | 7.77E+00 | 7.03E-20 | 1.04E-18 |
| ENSG00000182087 | TMEM259    | 1.14E+00 | 7.72E-20 | 1.14E-18 |
| ENSG00000153395 | LPCAT1     | 2.07E+00 | 7.91E-20 | 1.17E-18 |
| ENSG00000160888 | IER2       | 1.33E+00 | 8.43E-20 | 1.24E-18 |
| ENSG00000099822 | HCN2       | 2.94E+00 | 8.61E-20 | 1.27E-18 |
| ENSG00000184113 | CLDN5      | 8.37E+00 | 8.74E-20 | 1.29E-18 |
| ENSG00000099917 | MED15      | 1.27E+00 | 8.84E-20 | 1.30E-18 |
| ENSG00000138193 | PLCE1      | 2.38E+00 | 1.01E-19 | 1.48E-18 |
| ENSG00000004399 | PLXND1     | 1.36E+00 | 1.02E-19 | 1.49E-18 |
| ENSG00000198246 | SLC29A3    | 3.15E+00 | 1.10E-19 | 1.60E-18 |
| ENSG00000231290 | APCDD1L-DT | 2.76E+00 | 1.12E-19 | 1.63E-18 |
| ENSG00000177169 | ULK1       | 1.82E+00 | 1.24E-19 | 1.80E-18 |
| ENSG00000172731 | LRRC20     | 3.72E+00 | 1.27E-19 | 1.84E-18 |
| ENSG00000153303 | FRMD1      | 7.59E+00 | 1.30E-19 | 1.89E-18 |
| ENSG00000130595 | TNNT3      | 6.50E+00 | 1.39E-19 | 2.01E-18 |
| ENSG00000166086 | JAM3       | 1.26E+00 | 1.40E-19 | 2.02E-18 |
| ENSG00000156931 | VPS8       | 1.51E+00 | 1.41E-19 | 2.04E-18 |
| ENSG00000128340 | RAC2       | 8.18E+00 | 1.48E-19 | 2.13E-18 |
| ENSG00000119844 | AFTPH      | 1.45E+00 | 1.51E-19 | 2.19E-18 |
| ENSG00000260027 | HOXB7      | 1.91E+00 | 1.62E-19 | 2.34E-18 |
| ENSG00000078808 | SDF4       | 1.01E+00 | 1.65E-19 | 2.38E-18 |
| ENSG00000173530 | TNFRSF10D  | 1.39E+00 | 1.70E-19 | 2.45E-18 |
| ENSG00000038532 | CLEC16A    | 1.97E+00 | 1.73E-19 | 2.48E-18 |

|                 |           |          |          |          |
|-----------------|-----------|----------|----------|----------|
| ENSG00000215788 | TNFRSF25  | 4.06E+00 | 1.75E-19 | 2.52E-18 |
| ENSG00000148672 | GLUD1     | 1.03E+00 | 1.79E-19 | 2.56E-18 |
| ENSG00000124466 | LYPD3     | 4.23E+00 | 1.85E-19 | 2.65E-18 |
| ENSG00000166446 | CDYL2     | 2.16E+00 | 2.00E-19 | 2.86E-18 |
| ENSG00000164331 | ANKRA2    | 1.89E+00 | 2.07E-19 | 2.96E-18 |
| ENSG00000158859 | ADAMTS4   | 5.54E+00 | 2.15E-19 | 3.08E-18 |
| ENSG00000137831 | UACA      | 1.39E+00 | 2.20E-19 | 3.14E-18 |
| ENSG00000250510 | GPR162    | 2.74E+00 | 2.28E-19 | 3.25E-18 |
| ENSG00000171223 | JUNB      | 1.48E+00 | 2.37E-19 | 3.37E-18 |
| ENSG00000258791 | LINC00520 | 7.30E+00 | 2.54E-19 | 3.61E-18 |
| ENSG00000132359 | RAP1GAP2  | 2.87E+00 | 2.59E-19 | 3.68E-18 |
| ENSG00000197562 | RAB40C    | 1.96E+00 | 2.64E-19 | 3.75E-18 |
| ENSG00000167754 | KLK5      | 7.89E+00 | 2.73E-19 | 3.88E-18 |
| ENSG00000104055 | TGM5      | 7.01E+00 | 2.76E-19 | 3.92E-18 |
| ENSG00000186193 | SAPCD2    | 1.39E+00 | 2.90E-19 | 4.10E-18 |
| ENSG00000036448 | MYOM2     | 2.54E+00 | 3.02E-19 | 4.28E-18 |
| ENSG00000171206 | TRIM8     | 1.17E+00 | 3.28E-19 | 4.64E-18 |
| ENSG00000040608 | RTN4R     | 2.57E+00 | 3.31E-19 | 4.68E-18 |
| ENSG00000167508 | MVD       | 1.56E+00 | 3.33E-19 | 4.69E-18 |
| ENSG00000168453 | HR        | 2.59E+00 | 3.33E-19 | 4.70E-18 |
| ENSG00000135114 | OASL      | 4.48E+00 | 3.66E-19 | 5.15E-18 |
| ENSG00000188883 | KLRG2     | 7.15E+00 | 3.79E-19 | 5.34E-18 |
| ENSG00000164574 | GALNT10   | 1.30E+00 | 4.02E-19 | 5.65E-18 |
| ENSG00000099622 | CIRBP     | 1.11E+00 | 4.18E-19 | 5.87E-18 |
| ENSG00000151748 | SAV1      | 1.17E+00 | 4.24E-19 | 5.94E-18 |
| ENSG00000089177 | KIF16B    | 1.43E+00 | 4.42E-19 | 6.17E-18 |
| ENSG00000100234 | TIMP3     | 1.44E+00 | 4.49E-19 | 6.27E-18 |
| ENSG00000186847 | KRT14     | 1.20E+01 | 4.72E-19 | 6.59E-18 |
| ENSG00000092054 | MYH7      | 7.51E+00 | 4.88E-19 | 6.80E-18 |
| ENSG00000154040 | CABYR     | 2.93E+00 | 4.98E-19 | 6.93E-18 |
| ENSG00000278195 | SSTR3     | 7.48E+00 | 5.10E-19 | 7.10E-18 |
| ENSG00000122863 | CHST3     | 1.86E+00 | 5.20E-19 | 7.23E-18 |
| ENSG00000073578 | SDHA      | 1.17E+00 | 5.25E-19 | 7.30E-18 |
| ENSG00000176973 | FAM89B    | 2.31E+00 | 5.32E-19 | 7.39E-18 |
| ENSG00000153162 | BMP6      | 5.06E+00 | 5.65E-19 | 7.84E-18 |
| ENSG00000186642 | PDE2A     | 7.20E+00 | 5.93E-19 | 8.22E-18 |
| ENSG00000158828 | PINK1     | 1.79E+00 | 6.04E-19 | 8.35E-18 |
| ENSG00000244300 | GATA2-AS1 | 3.01E+00 | 6.08E-19 | 8.40E-18 |
| ENSG00000240194 | CYMP      | 7.67E+00 | 6.46E-19 | 8.91E-18 |
| ENSG00000108639 | SYNGR2    | 1.35E+00 | 6.47E-19 | 8.93E-18 |
| ENSG00000092330 | TINF2     | 1.80E+00 | 6.50E-19 | 8.95E-18 |
| ENSG00000141744 | PNMT      | 5.10E+00 | 6.50E-19 | 8.95E-18 |
| ENSG00000169994 | MYO7B     | 6.53E+00 | 6.81E-19 | 9.36E-18 |
| ENSG00000128298 | BAIAP2L2  | 6.91E+00 | 6.83E-19 | 9.38E-18 |
| ENSG00000177494 | ZBED2     | 7.55E+00 | 6.85E-19 | 9.40E-18 |

|                 |            |          |          |          |
|-----------------|------------|----------|----------|----------|
| ENSG0000005882  | PDK2       | 2.06E+00 | 7.05E-19 | 9.65E-18 |
| ENSG00000182919 | C11orf54   | 2.24E+00 | 7.28E-19 | 9.97E-18 |
| ENSG00000114353 | GNAI2      | 1.11E+00 | 7.87E-19 | 1.08E-17 |
| ENSG00000106976 | DNM1       | 2.44E+00 | 7.89E-19 | 1.08E-17 |
| ENSG00000119686 | FLVCR2     | 3.77E+00 | 7.88E-19 | 1.08E-17 |
| ENSG00000168961 | LGALS9     | 3.47E+00 | 9.35E-19 | 1.27E-17 |
| ENSG00000108309 | RUNDC3A    | 7.49E+00 | 9.50E-19 | 1.29E-17 |
| ENSG00000105388 | CEACAM5    | 7.63E+00 | 1.05E-18 | 1.43E-17 |
| ENSG00000012822 | CALCOCO1   | 2.20E+00 | 1.14E-18 | 1.55E-17 |
| ENSG00000099625 | CBARP      | 2.93E+00 | 1.18E-18 | 1.59E-17 |
| ENSG00000055609 | KMT2C      | 1.83E+00 | 1.19E-18 | 1.60E-17 |
| ENSG00000115596 | WNT6       | 3.01E+00 | 1.30E-18 | 1.75E-17 |
| ENSG00000213918 | DNASE1     | 2.07E+00 | 1.31E-18 | 1.76E-17 |
| ENSG00000100979 | PLTP       | 1.35E+00 | 1.41E-18 | 1.90E-17 |
| ENSG00000125089 | SH3TC1     | 3.27E+00 | 1.52E-18 | 2.04E-17 |
| ENSG00000214193 | SH3D21     | 2.74E+00 | 1.55E-18 | 2.08E-17 |
| ENSG00000154153 | RETREG1    | 4.96E+00 | 1.56E-18 | 2.09E-17 |
| ENSG00000118689 | FOXO3      | 1.39E+00 | 1.59E-18 | 2.13E-17 |
| ENSG00000214688 | C10orf105  | 7.39E+00 | 1.63E-18 | 2.18E-17 |
| ENSG00000215182 | MUC5AC     | 7.01E+00 | 1.66E-18 | 2.22E-17 |
| ENSG00000143867 | OSR1       | 4.73E+00 | 1.82E-18 | 2.42E-17 |
| ENSG00000162706 | CADM3      | 4.57E+00 | 1.87E-18 | 2.49E-17 |
| ENSG00000156535 | CD109      | 1.39E+00 | 1.87E-18 | 2.49E-17 |
| ENSG00000197183 | NOL4L      | 1.70E+00 | 1.96E-18 | 2.61E-17 |
| ENSG00000182372 | CLN8       | 1.43E+00 | 1.99E-18 | 2.64E-17 |
| ENSG00000173153 | ESRRA      | 1.44E+00 | 2.02E-18 | 2.68E-17 |
| ENSG00000114541 | FRMD4B     | 4.11E+00 | 2.14E-18 | 2.85E-17 |
| ENSG00000116663 | FBXO6      | 3.14E+00 | 2.17E-18 | 2.88E-17 |
| ENSG00000136856 | SLC2A8     | 2.30E+00 | 2.18E-18 | 2.89E-17 |
| ENSG00000079805 | DNM2       | 1.38E+00 | 2.32E-18 | 3.06E-17 |
| ENSG00000100997 | ABHD12     | 1.52E+00 | 2.32E-18 | 3.07E-17 |
| ENSG00000071894 | CPSF1      | 1.27E+00 | 2.40E-18 | 3.17E-17 |
| ENSG00000011600 | TYROBP     | 7.60E+00 | 2.53E-18 | 3.34E-17 |
| ENSG00000076864 | RAP1GAP    | 3.29E+00 | 2.73E-18 | 3.59E-17 |
| ENSG00000127663 | KDM4B      | 1.62E+00 | 2.81E-18 | 3.69E-17 |
| ENSG00000105325 | FZR1       | 1.02E+00 | 2.85E-18 | 3.74E-17 |
| ENSG00000059122 | FLYWCH1    | 1.45E+00 | 2.87E-18 | 3.76E-17 |
| ENSG00000234127 | TRIM26     | 1.43E+00 | 2.96E-18 | 3.87E-17 |
| ENSG00000214135 | AC132008.2 | 2.23E+00 | 3.21E-18 | 4.20E-17 |
| ENSG00000131242 | RAB11FIP4  | 2.08E+00 | 3.44E-18 | 4.50E-17 |
| ENSG00000135631 | RAB11FIP5  | 1.67E+00 | 3.56E-18 | 4.66E-17 |
| ENSG00000260912 | AL158206.1 | 3.04E+00 | 3.57E-18 | 4.67E-17 |
| ENSG00000251322 | SHANK3     | 2.47E+00 | 3.83E-18 | 5.00E-17 |
| ENSG00000164867 | NOS3       | 7.36E+00 | 4.02E-18 | 5.24E-17 |
| ENSG00000130477 | UNC13A     | 4.76E+00 | 4.35E-18 | 5.67E-17 |

|                 |          |          |          |          |
|-----------------|----------|----------|----------|----------|
| ENSG00000052344 | PRSS8    | 5.70E+00 | 4.63E-18 | 6.02E-17 |
| ENSG00000198853 | RUSC2    | 1.75E+00 | 4.70E-18 | 6.11E-17 |
| ENSG00000138207 | RBP4     | 4.74E+00 | 4.82E-18 | 6.26E-17 |
| ENSG00000124222 | STX16    | 1.42E+00 | 5.08E-18 | 6.59E-17 |
| ENSG00000185633 | NDUFA4L2 | 6.80E+00 | 5.86E-18 | 7.58E-17 |
| ENSG00000159625 | DRC7     | 7.53E+00 | 6.02E-18 | 7.79E-17 |
| ENSG00000183114 | FAM43B   | 2.77E+00 | 6.20E-18 | 8.01E-17 |
| ENSG00000153487 | ING1     | 1.13E+00 | 6.38E-18 | 8.24E-17 |
| ENSG00000166183 | ASPG     | 7.38E+00 | 6.69E-18 | 8.63E-17 |
| ENSG00000177427 | MIEF2    | 2.49E+00 | 6.95E-18 | 8.96E-17 |
| ENSG00000219607 | PPP1R3G  | 4.15E+00 | 7.08E-18 | 9.13E-17 |
| ENSG00000103335 | PIEZO1   | 1.01E+00 | 7.37E-18 | 9.49E-17 |
| ENSG00000011243 | AKAP8L   | 1.13E+00 | 7.80E-18 | 1.00E-16 |
| ENSG00000159871 | LYPD5    | 3.15E+00 | 8.27E-18 | 1.06E-16 |
| ENSG00000048740 | CELF2    | 7.55E+00 | 9.10E-18 | 1.17E-16 |
| ENSG00000196562 | SULF2    | 1.40E+00 | 9.30E-18 | 1.19E-16 |
| ENSG00000225697 | SLC26A6  | 1.45E+00 | 9.31E-18 | 1.19E-16 |
| ENSG00000130055 | GDPD2    | 7.28E+00 | 9.33E-18 | 1.19E-16 |
| ENSG00000141971 | MVB12A   | 1.97E+00 | 9.68E-18 | 1.24E-16 |
| ENSG00000053747 | LAMA3    | 4.13E+00 | 9.96E-18 | 1.27E-16 |
| ENSG00000260916 | CCPG1    | 1.78E+00 | 9.98E-18 | 1.27E-16 |
| ENSG00000154217 | PITPNC1  | 2.46E+00 | 1.07E-17 | 1.37E-16 |
| ENSG00000121769 | FABP3    | 7.85E+00 | 1.08E-17 | 1.37E-16 |
| ENSG00000066468 | FGFR2    | 2.94E+00 | 1.16E-17 | 1.47E-16 |
| ENSG00000080031 | PTPRH    | 4.94E+00 | 1.16E-17 | 1.48E-16 |
| ENSG00000056972 | TRAF3IP2 | 2.19E+00 | 1.17E-17 | 1.48E-16 |
| ENSG00000166377 | ATP9B    | 2.94E+00 | 1.25E-17 | 1.59E-16 |
| ENSG00000161896 | IP6K3    | 5.15E+00 | 1.28E-17 | 1.63E-16 |
| ENSG00000131408 | NR1H2    | 1.41E+00 | 1.43E-17 | 1.80E-16 |
| ENSG00000177042 | TMEM80   | 2.33E+00 | 1.58E-17 | 1.99E-16 |
| ENSG00000215915 | ATAD3C   | 6.99E+00 | 1.58E-17 | 2.00E-16 |
| ENSG00000135750 | KCNK1    | 4.09E+00 | 1.67E-17 | 2.10E-16 |
| ENSG00000149115 | TNKS1BP1 | 1.27E+00 | 1.68E-17 | 2.12E-16 |
| ENSG00000178597 | PSAPL1   | 7.03E+00 | 1.69E-17 | 2.13E-16 |
| ENSG00000166340 | TPP1     | 1.25E+00 | 1.71E-17 | 2.15E-16 |
| ENSG00000131771 | PPP1R1B  | 7.24E+00 | 1.81E-17 | 2.27E-16 |
| ENSG00000243279 | PRAF2    | 1.57E+00 | 1.82E-17 | 2.28E-16 |
| ENSG00000196155 | PLEKHG4  | 4.78E+00 | 1.83E-17 | 2.29E-16 |
| ENSG00000121316 | PLBD1    | 5.48E+00 | 1.90E-17 | 2.38E-16 |
| ENSG00000069020 | MAST4    | 3.23E+00 | 2.00E-17 | 2.50E-16 |
| ENSG00000101180 | HRH3     | 7.52E+00 | 2.07E-17 | 2.58E-16 |
| ENSG00000136378 | ADAMTS7  | 3.02E+00 | 2.14E-17 | 2.67E-16 |
| ENSG00000187024 | PTRH1    | 2.10E+00 | 2.15E-17 | 2.68E-16 |
| ENSG00000111344 | RASAL1   | 7.12E+00 | 2.27E-17 | 2.82E-16 |
| ENSG00000105058 | FAM32A   | 1.18E+00 | 2.31E-17 | 2.87E-16 |



|                 |            |          |          |          |
|-----------------|------------|----------|----------|----------|
| ENSG00000178297 | TMPRSS9    | 6.94E+00 | 2.34E-17 | 2.91E-16 |
| ENSG00000262152 | LINC00514  | 6.67E+00 | 2.41E-17 | 2.99E-16 |
| ENSG00000103034 | NDRG4      | 3.66E+00 | 2.43E-17 | 3.01E-16 |
| ENSG00000204060 | FOXO6      | 5.67E+00 | 2.50E-17 | 3.10E-16 |
| ENSG00000167281 | RBFOX3     | 6.66E+00 | 2.67E-17 | 3.30E-16 |
| ENSG00000130511 | SSBP4      | 1.35E+00 | 2.72E-17 | 3.35E-16 |
| ENSG00000166863 | TAC3       | 7.56E+00 | 2.72E-17 | 3.35E-16 |
| ENSG00000184350 | MRGPRE     | 7.14E+00 | 2.75E-17 | 3.39E-16 |
| ENSG00000135423 | GLS2       | 3.23E+00 | 2.78E-17 | 3.42E-16 |
| ENSG00000090539 | CHRD       | 4.88E+00 | 2.81E-17 | 3.46E-16 |
| ENSG00000213889 | PPM1N      | 2.83E+00 | 3.12E-17 | 3.83E-16 |
| ENSG00000116032 | GRIN3B     | 5.42E+00 | 3.23E-17 | 3.96E-16 |
| ENSG00000113555 | PCDH12     | 7.39E+00 | 3.25E-17 | 3.99E-16 |
| ENSG00000100290 | BIK        | 5.02E+00 | 3.34E-17 | 4.08E-16 |
| ENSG00000167676 | PLIN4      | 6.74E+00 | 3.42E-17 | 4.17E-16 |
| ENSG00000154118 | JPH3       | 3.66E+00 | 3.42E-17 | 4.18E-16 |
| ENSG00000127578 | WFIKKN1    | 5.47E+00 | 3.50E-17 | 4.27E-16 |
| ENSG00000226332 | AL354836.1 | 3.85E+00 | 3.84E-17 | 4.68E-16 |
| ENSG00000133961 | NUMB       | 1.19E+00 | 4.05E-17 | 4.93E-16 |
| ENSG00000130222 | GADD45G    | 6.10E+00 | 4.11E-17 | 5.00E-16 |
| ENSG00000129910 | CDH15      | 7.29E+00 | 4.24E-17 | 5.15E-16 |
| ENSG00000064932 | SBNO2      | 1.00E+00 | 4.27E-17 | 5.18E-16 |
| ENSG00000168447 | SCNN1B     | 7.15E+00 | 4.34E-17 | 5.26E-16 |
| ENSG00000187634 | SAMD11     | 2.39E+00 | 4.50E-17 | 5.45E-16 |
| ENSG00000166839 | ANKDD1A    | 2.65E+00 | 4.52E-17 | 5.47E-16 |
| ENSG00000178038 | ALS2CL     | 5.70E+00 | 5.16E-17 | 6.23E-16 |
| ENSG00000184897 | H1FX       | 1.11E+00 | 5.71E-17 | 6.90E-16 |
| ENSG00000130244 | FAM98C     | 1.92E+00 | 5.92E-17 | 7.14E-16 |
| ENSG00000007264 | MATK       | 4.59E+00 | 5.99E-17 | 7.22E-16 |
| ENSG00000148341 | SH3GLB2    | 1.32E+00 | 6.11E-17 | 7.36E-16 |
| ENSG00000171794 | UTF1       | 7.37E+00 | 6.71E-17 | 8.06E-16 |
| ENSG00000100884 | CPNE6      | 7.36E+00 | 7.53E-17 | 9.01E-16 |
| ENSG00000083812 | ZNF324     | 1.29E+00 | 7.55E-17 | 9.04E-16 |
| ENSG00000167941 | SOST       | 7.14E+00 | 7.57E-17 | 9.06E-16 |
| ENSG00000198074 | AKR1B10    | 3.42E+00 | 7.63E-17 | 9.12E-16 |
| ENSG00000179111 | HES7       | 4.89E+00 | 7.78E-17 | 9.30E-16 |
| ENSG00000007516 | BAIAP3     | 3.28E+00 | 7.96E-17 | 9.49E-16 |
| ENSG00000000938 | FGR        | 7.21E+00 | 8.09E-17 | 9.64E-16 |
| ENSG00000107745 | MICU1      | 1.13E+00 | 8.30E-17 | 9.88E-16 |
| ENSG00000181381 | DDX60L     | 2.56E+00 | 8.30E-17 | 9.88E-16 |
| ENSG00000160410 | SHKBP1     | 1.26E+00 | 8.39E-17 | 9.97E-16 |
| ENSG00000075891 | PAX2       | 6.76E+00 | 8.41E-17 | 1.00E-15 |
| ENSG00000144040 | SFXN5      | 1.26E+00 | 9.01E-17 | 1.07E-15 |
| ENSG00000127129 | EDN2       | 7.48E+00 | 9.24E-17 | 1.09E-15 |
| ENSG00000087116 | ADAMTS2    | 4.36E+00 | 9.52E-17 | 1.13E-15 |

|                 |           |          |          |          |
|-----------------|-----------|----------|----------|----------|
| ENSG00000095637 | SORBS1    | 2.86E+00 | 1.04E-16 | 1.22E-15 |
| ENSG00000011198 | ABHD5     | 1.34E+00 | 1.05E-16 | 1.24E-15 |
| ENSG00000164379 | FOXQ1     | 6.06E+00 | 1.09E-16 | 1.28E-15 |
| ENSG00000175984 | DENND2C   | 4.17E+00 | 1.10E-16 | 1.30E-15 |
| ENSG00000087510 | TFAP2C    | 1.68E+00 | 1.12E-16 | 1.32E-15 |
| ENSG00000196998 | WDR45     | 1.38E+00 | 1.13E-16 | 1.33E-15 |
| ENSG00000182831 | C16orf72  | 1.17E+00 | 1.14E-16 | 1.34E-15 |
| ENSG00000015592 | STMN4     | 7.29E+00 | 1.25E-16 | 1.46E-15 |
| ENSG00000106018 | VIPR2     | 7.13E+00 | 1.30E-16 | 1.52E-15 |
| ENSG00000108370 | RGS9      | 3.67E+00 | 1.35E-16 | 1.58E-15 |
| ENSG00000007306 | CEACAM7   | 7.06E+00 | 1.46E-16 | 1.70E-15 |
| ENSG00000130475 | FCHO1     | 6.80E+00 | 1.51E-16 | 1.76E-15 |
| ENSG00000105409 | ATP1A3    | 3.95E+00 | 1.57E-16 | 1.83E-15 |
| ENSG00000127452 | FBXL12    | 1.16E+00 | 1.64E-16 | 1.91E-15 |
| ENSG00000140511 | HAPLN3    | 1.83E+00 | 1.69E-16 | 1.96E-15 |
| ENSG00000102854 | MSLN      | 6.76E+00 | 1.70E-16 | 1.97E-15 |
| ENSG00000114573 | ATP6V1A   | 1.17E+00 | 1.70E-16 | 1.97E-15 |
| ENSG00000108523 | RNF167    | 1.57E+00 | 1.74E-16 | 2.02E-15 |
| ENSG00000116574 | RHOU      | 4.51E+00 | 1.75E-16 | 2.03E-15 |
| ENSG00000238266 | LINC00707 | 6.53E+00 | 1.77E-16 | 2.04E-15 |
| ENSG00000128567 | PODXL     | 1.50E+00 | 1.79E-16 | 2.06E-15 |
| ENSG00000179862 | CITED4    | 2.93E+00 | 1.82E-16 | 2.10E-15 |
| ENSG00000153029 | MR1       | 2.41E+00 | 1.93E-16 | 2.22E-15 |
| ENSG00000105053 | VRK3      | 1.36E+00 | 1.99E-16 | 2.30E-15 |
| ENSG00000153531 | ADPRHL1   | 3.44E+00 | 2.12E-16 | 2.44E-15 |
| ENSG00000105856 | HBP1      | 1.57E+00 | 2.13E-16 | 2.45E-15 |
| ENSG00000054598 | FOXC1     | 1.57E+00 | 2.17E-16 | 2.48E-15 |
| ENSG00000166016 | ABTB2     | 1.92E+00 | 2.24E-16 | 2.56E-15 |
| ENSG00000127125 | PPCS      | 1.20E+00 | 2.24E-16 | 2.57E-15 |
| ENSG00000105419 | MEIS3     | 1.41E+00 | 2.26E-16 | 2.59E-15 |
| ENSG00000213853 | EMP2      | 1.00E+00 | 2.27E-16 | 2.60E-15 |
| ENSG00000117525 | F3        | 1.46E+00 | 2.35E-16 | 2.69E-15 |
| ENSG00000137177 | KIF13A    | 1.47E+00 | 2.74E-16 | 3.12E-15 |
| ENSG00000159069 | FBXW5     | 1.17E+00 | 3.00E-16 | 3.41E-15 |
| ENSG00000160862 | AZGP1     | 7.58E+00 | 3.06E-16 | 3.47E-15 |
| ENSG00000173706 | HEG1      | 1.52E+00 | 3.14E-16 | 3.55E-15 |
| ENSG00000100077 | GRK3      | 2.00E+00 | 3.21E-16 | 3.63E-15 |
| ENSG00000169181 | GSG1L     | 6.64E+00 | 3.32E-16 | 3.75E-15 |
| ENSG00000257122 | RRN3P3    | 1.80E+00 | 3.35E-16 | 3.78E-15 |
| ENSG00000089159 | PXN       | 1.28E+00 | 3.42E-16 | 3.85E-15 |
| ENSG00000179981 | TSHZ1     | 1.75E+00 | 3.56E-16 | 4.01E-15 |
| ENSG00000169035 | KLK7      | 7.48E+00 | 3.84E-16 | 4.32E-15 |
| ENSG00000114737 | CISH      | 2.15E+00 | 3.91E-16 | 4.39E-15 |
| ENSG00000057657 | PRDM1     | 3.03E+00 | 3.94E-16 | 4.42E-15 |
| ENSG00000261150 | EPPK1     | 2.15E+00 | 4.02E-16 | 4.49E-15 |

|                 |             |          |          |          |
|-----------------|-------------|----------|----------|----------|
| ENSG00000211445 | GPX3        | 1.19E+00 | 4.34E-16 | 4.86E-15 |
| ENSG00000197558 | SSPO        | 7.33E+00 | 4.38E-16 | 4.90E-15 |
| ENSG00000276758 | AC245884.12 | 7.45E+00 | 4.54E-16 | 5.06E-15 |
| ENSG00000006432 | MAP3K9      | 1.93E+00 | 4.74E-16 | 5.29E-15 |
| ENSG00000100292 | HMOX1       | 2.50E+00 | 4.85E-16 | 5.41E-15 |
| ENSG00000126214 | KLC1        | 1.28E+00 | 5.10E-16 | 5.67E-15 |
| ENSG00000123159 | GIPC1       | 1.71E+00 | 5.16E-16 | 5.73E-15 |
| ENSG00000169991 | IFFO2       | 1.40E+00 | 5.18E-16 | 5.76E-15 |
| ENSG00000135655 | USP15       | 1.16E+00 | 5.82E-16 | 6.46E-15 |
| ENSG00000149328 | GLB1L2      | 2.82E+00 | 5.90E-16 | 6.54E-15 |
| ENSG00000140836 | ZFHX3       | 1.36E+00 | 6.09E-16 | 6.74E-15 |
| ENSG00000167173 | C15orf39    | 1.30E+00 | 6.25E-16 | 6.92E-15 |
| ENSG00000100151 | PICK1       | 1.83E+00 | 6.27E-16 | 6.93E-15 |
| ENSG00000112837 | TBX18       | 1.53E+00 | 6.48E-16 | 7.16E-15 |
| ENSG00000130643 | CALY        | 6.63E+00 | 6.62E-16 | 7.30E-15 |
| ENSG00000071282 | LMCD1       | 2.36E+00 | 6.69E-16 | 7.37E-15 |
| ENSG00000188483 | IER5L       | 1.77E+00 | 6.75E-16 | 7.43E-15 |
| ENSG00000166167 | BTRC        | 1.81E+00 | 7.03E-16 | 7.73E-15 |
| ENSG00000072786 | STK10       | 1.46E+00 | 7.10E-16 | 7.81E-15 |
| ENSG00000242086 | MUC20-OT1   | 1.89E+00 | 7.18E-16 | 7.88E-15 |
| ENSG00000151640 | DPYSL4      | 1.76E+00 | 7.58E-16 | 8.31E-15 |
| ENSG00000187017 | ESPN        | 5.62E+00 | 7.64E-16 | 8.38E-15 |
| ENSG00000164082 | GRM2        | 3.72E+00 | 8.02E-16 | 8.77E-15 |
| ENSG00000137857 | DUOX1       | 7.32E+00 | 9.34E-16 | 1.02E-14 |
| ENSG00000197273 | GUCA2A      | 7.21E+00 | 9.68E-16 | 1.06E-14 |
| ENSG00000262714 | AC007342.5  | 5.65E+00 | 9.73E-16 | 1.06E-14 |
| ENSG00000008323 | PLEKHG6     | 7.11E+00 | 9.87E-16 | 1.07E-14 |
| ENSG00000148826 | NKX6-2      | 6.87E+00 | 1.01E-15 | 1.10E-14 |
| ENSG00000168913 | ENHO        | 2.44E+00 | 1.03E-15 | 1.12E-14 |
| ENSG00000173156 | RHOD        | 4.22E+00 | 1.05E-15 | 1.14E-14 |
| ENSG00000119522 | DENND1A     | 1.38E+00 | 1.19E-15 | 1.29E-14 |
| ENSG00000157107 | FCHO2       | 1.84E+00 | 1.22E-15 | 1.32E-14 |
| ENSG00000089639 | GMIP        | 1.39E+00 | 1.26E-15 | 1.36E-14 |
| ENSG00000205978 | NYNRIN      | 6.67E+00 | 1.30E-15 | 1.40E-14 |
| ENSG00000169155 | ZBTB43      | 1.62E+00 | 1.33E-15 | 1.43E-14 |
| ENSG00000164050 | PLXNB1      | 1.78E+00 | 1.38E-15 | 1.49E-14 |
| ENSG00000099331 | MYO9B       | 1.27E+00 | 1.41E-15 | 1.52E-14 |
| ENSG00000250385 | AC106772.2  | 7.24E+00 | 1.44E-15 | 1.55E-14 |
| ENSG00000170836 | PPM1D       | 1.62E+00 | 1.46E-15 | 1.57E-14 |
| ENSG00000197696 | NMB         | 2.14E+00 | 1.55E-15 | 1.66E-14 |
| ENSG00000067836 | ROGDI       | 1.91E+00 | 1.56E-15 | 1.67E-14 |
| ENSG00000162522 | KIAA1522    | 1.46E+00 | 1.57E-15 | 1.69E-14 |
| ENSG00000161082 | CELF5       | 4.15E+00 | 1.63E-15 | 1.75E-14 |
| ENSG00000105127 | AKAP8       | 1.10E+00 | 1.69E-15 | 1.81E-14 |
| ENSG00000242265 | PEG10       | 1.85E+00 | 1.72E-15 | 1.84E-14 |

|                 |            |          |          |          |
|-----------------|------------|----------|----------|----------|
| ENSG00000136943 | CTSV       | 1.26E+00 | 1.80E-15 | 1.92E-14 |
| ENSG00000105298 | CACTIN     | 1.61E+00 | 1.88E-15 | 2.01E-14 |
| ENSG00000023892 | DEF6       | 2.52E+00 | 1.90E-15 | 2.02E-14 |
| ENSG00000135956 | TMEM127    | 1.21E+00 | 2.02E-15 | 2.14E-14 |
| ENSG00000160271 | RALGDS     | 2.06E+00 | 2.30E-15 | 2.44E-14 |
| ENSG00000142235 | LMTK3      | 3.66E+00 | 2.42E-15 | 2.56E-14 |
| ENSG00000135638 | EMX1       | 5.57E+00 | 2.46E-15 | 2.60E-14 |
| ENSG00000151117 | TMEM86A    | 3.95E+00 | 2.47E-15 | 2.61E-14 |
| ENSG00000154358 | OBSCN      | 3.24E+00 | 2.48E-15 | 2.62E-14 |
| ENSG00000175832 | ETV4       | 1.50E+00 | 2.53E-15 | 2.68E-14 |
| ENSG00000178301 | AQP11      | 3.42E+00 | 2.54E-15 | 2.68E-14 |
| ENSG00000112559 | MDFI       | 6.01E+00 | 2.62E-15 | 2.76E-14 |
| ENSG00000121039 | RDH10      | 1.83E+00 | 2.70E-15 | 2.84E-14 |
| ENSG00000171970 | ZNF57      | 3.03E+00 | 2.81E-15 | 2.95E-14 |
| ENSG00000165757 | JCAD       | 2.52E+00 | 3.19E-15 | 3.35E-14 |
| ENSG00000260001 | TGFBR3L    | 2.58E+00 | 3.86E-15 | 4.04E-14 |
| ENSG00000071205 | ARHGAP10   | 1.47E+00 | 3.94E-15 | 4.12E-14 |
| ENSG00000163435 | ELF3       | 4.25E+00 | 4.22E-15 | 4.40E-14 |
| ENSG00000141741 | MIEN1      | 1.67E+00 | 4.36E-15 | 4.54E-14 |
| ENSG00000105699 | LSR        | 1.39E+00 | 4.44E-15 | 4.62E-14 |
| ENSG00000006606 | CCL26      | 4.95E+00 | 4.95E-15 | 5.13E-14 |
| ENSG00000254827 | SLC22A18AS | 7.57E+00 | 4.96E-15 | 5.13E-14 |
| ENSG00000135002 | RFK        | 1.31E+00 | 5.47E-15 | 5.66E-14 |
| ENSG00000196220 | SRGAP3     | 4.64E+00 | 5.50E-15 | 5.68E-14 |
| ENSG00000156299 | TIAM1      | 2.34E+00 | 5.84E-15 | 6.02E-14 |
| ENSG00000132481 | TRIM47     | 1.53E+00 | 5.85E-15 | 6.03E-14 |
| ENSG00000242802 | AP5Z1      | 1.26E+00 | 5.84E-15 | 6.03E-14 |
| ENSG00000126432 | PRDX5      | 2.02E+00 | 6.09E-15 | 6.27E-14 |
| ENSG00000163827 | LRRC2      | 4.30E+00 | 6.33E-15 | 6.50E-14 |
| ENSG00000197150 | ABCB8      | 1.30E+00 | 6.33E-15 | 6.50E-14 |
| ENSG00000102891 | MT4        | 7.78E+00 | 6.63E-15 | 6.80E-14 |
| ENSG00000092051 | JPH4       | 6.68E+00 | 7.01E-15 | 7.19E-14 |
| ENSG00000060069 | CTDP1      | 1.64E+00 | 7.03E-15 | 7.20E-14 |
| ENSG00000157978 | LDLRAP1    | 1.49E+00 | 7.26E-15 | 7.43E-14 |
| ENSG00000197694 | SPTAN1     | 1.74E+00 | 7.72E-15 | 7.89E-14 |
| ENSG00000105643 | ARRDC2     | 1.32E+00 | 7.83E-15 | 7.99E-14 |
| ENSG00000103051 | COG4       | 1.28E+00 | 7.94E-15 | 8.09E-14 |
| ENSG00000102897 | LYRM1      | 1.46E+00 | 8.10E-15 | 8.24E-14 |
| ENSG00000170373 | CST1       | 8.09E+00 | 8.59E-15 | 8.72E-14 |
| ENSG00000167434 | CA4        | 6.86E+00 | 8.70E-15 | 8.83E-14 |
| ENSG00000129250 | KIF1C      | 1.04E+00 | 8.81E-15 | 8.94E-14 |
| ENSG00000135740 | SLC9A5     | 2.36E+00 | 8.89E-15 | 9.01E-14 |
| ENSG00000021762 | OSBPL5     | 3.01E+00 | 9.00E-15 | 9.12E-14 |
| ENSG00000164855 | TMEM184A   | 1.95E+00 | 9.02E-15 | 9.12E-14 |
| ENSG00000174564 | IL20RB     | 3.74E+00 | 9.01E-15 | 9.12E-14 |

|                 |            |          |          |          |
|-----------------|------------|----------|----------|----------|
| ENSG00000156232 | WHAMM      | 1.26E+00 | 9.42E-15 | 9.52E-14 |
| ENSG00000275329 | AL138781.1 | 6.48E+00 | 9.89E-15 | 9.97E-14 |
| ENSG00000119655 | NPC2       | 1.56E+00 | 1.03E-14 | 1.04E-13 |
| ENSG00000130584 | ZBTB46     | 2.25E+00 | 1.04E-14 | 1.04E-13 |
| ENSG00000136720 | HS6ST1     | 1.73E+00 | 1.05E-14 | 1.06E-13 |
| ENSG00000089327 | FXD5       | 1.09E+00 | 1.06E-14 | 1.06E-13 |
| ENSG00000122694 | GLIPR2     | 1.26E+00 | 1.07E-14 | 1.07E-13 |
| ENSG00000198873 | GRK5       | 1.67E+00 | 1.07E-14 | 1.08E-13 |
| ENSG00000143344 | RGL1       | 1.63E+00 | 1.09E-14 | 1.09E-13 |
| ENSG00000224940 | PRRT4      | 4.65E+00 | 1.10E-14 | 1.10E-13 |
| ENSG00000068137 | PLEKHH3    | 1.80E+00 | 1.11E-14 | 1.11E-13 |
| ENSG00000115457 | IGFBP2     | 2.65E+00 | 1.13E-14 | 1.13E-13 |
| ENSG00000173714 | WFIKN2     | 7.29E+00 | 1.17E-14 | 1.16E-13 |
| ENSG00000176387 | HSD11B2    | 4.51E+00 | 1.17E-14 | 1.17E-13 |
| ENSG00000158292 | GPR153     | 2.26E+00 | 1.20E-14 | 1.19E-13 |
| ENSG00000128849 | CGNL1      | 3.25E+00 | 1.29E-14 | 1.28E-13 |
| ENSG00000179242 | CDH4       | 3.79E+00 | 1.30E-14 | 1.29E-13 |
| ENSG00000107187 | LHX3       | 5.78E+00 | 1.32E-14 | 1.31E-13 |
| ENSG00000176058 | TPRN       | 1.27E+00 | 1.37E-14 | 1.36E-13 |
| ENSG00000173120 | KDM2A      | 1.18E+00 | 1.46E-14 | 1.45E-13 |
| ENSG00000101842 | VSIG1      | 7.17E+00 | 1.59E-14 | 1.58E-13 |
| ENSG00000104419 | NDRG1      | 1.14E+00 | 1.60E-14 | 1.58E-13 |
| ENSG00000174915 | PTDSS2     | 1.20E+00 | 1.60E-14 | 1.58E-13 |
| ENSG00000169217 | CD2BP2     | 1.08E+00 | 1.61E-14 | 1.59E-13 |
| ENSG00000256982 | AC135782.1 | 4.85E+00 | 1.62E-14 | 1.59E-13 |
| ENSG00000146674 | IGFBP3     | 1.58E+00 | 1.64E-14 | 1.62E-13 |
| ENSG00000080815 | PSEN1      | 1.15E+00 | 1.66E-14 | 1.64E-13 |
| ENSG00000286389 | AL731702.1 | 7.06E+00 | 1.76E-14 | 1.74E-13 |
| ENSG00000106211 | HSPB1      | 1.26E+00 | 1.81E-14 | 1.77E-13 |
| ENSG00000180098 | TRNAU1AP   | 1.38E+00 | 1.81E-14 | 1.78E-13 |
| ENSG00000132376 | INPP5K     | 1.65E+00 | 1.81E-14 | 1.78E-13 |
| ENSG00000177694 | NAALADL2   | 6.53E+00 | 1.97E-14 | 1.93E-13 |
| ENSG00000167100 | SAMD14     | 2.34E+00 | 1.97E-14 | 1.93E-13 |
| ENSG00000088298 | EDEM2      | 1.32E+00 | 1.98E-14 | 1.93E-13 |
| ENSG00000143842 | SOX13      | 1.86E+00 | 2.01E-14 | 1.97E-13 |
| ENSG00000100280 | AP1B1      | 1.00E+00 | 2.03E-14 | 1.98E-13 |
| ENSG00000206140 | TMEM191C   | 5.67E+00 | 2.06E-14 | 2.01E-13 |
| ENSG00000106003 | LFNG       | 1.66E+00 | 2.06E-14 | 2.01E-13 |
| ENSG00000158220 | ESYT3      | 3.87E+00 | 2.10E-14 | 2.05E-13 |
| ENSG00000125968 | ID1        | 1.33E+00 | 2.12E-14 | 2.06E-13 |
| ENSG00000141968 | VAV1       | 6.59E+00 | 2.12E-14 | 2.07E-13 |
| ENSG00000131748 | STARD3     | 1.06E+00 | 2.21E-14 | 2.15E-13 |
| ENSG00000237289 | CKMT1B     | 4.21E+00 | 2.30E-14 | 2.24E-13 |
| ENSG00000099821 | POLRMT     | 1.08E+00 | 2.32E-14 | 2.25E-13 |
| ENSG00000169733 | RFNG       | 1.46E+00 | 2.35E-14 | 2.28E-13 |

|                 |            |          |          |          |
|-----------------|------------|----------|----------|----------|
| ENSG00000157445 | CACNA2D3   | 3.89E+00 | 2.40E-14 | 2.33E-13 |
| ENSG00000183018 | SPNS2      | 6.71E+00 | 2.43E-14 | 2.36E-13 |
| ENSG00000127666 | TICAM1     | 1.55E+00 | 2.47E-14 | 2.39E-13 |
| ENSG00000108262 | GIT1       | 1.20E+00 | 2.74E-14 | 2.65E-13 |
| ENSG00000172830 | SSH3       | 1.80E+00 | 2.80E-14 | 2.70E-13 |
| ENSG00000072832 | CRMP1      | 2.50E+00 | 2.82E-14 | 2.72E-13 |
| ENSG00000121350 | PYROXD1    | 1.76E+00 | 2.86E-14 | 2.76E-13 |
| ENSG00000196743 | GM2A       | 1.79E+00 | 2.90E-14 | 2.79E-13 |
| ENSG00000178184 | PARD6G     | 1.79E+00 | 2.92E-14 | 2.81E-13 |
| ENSG00000078237 | TIGAR      | 1.92E+00 | 2.93E-14 | 2.82E-13 |
| ENSG00000167065 | DUSP18     | 1.90E+00 | 3.02E-14 | 2.90E-13 |
| ENSG00000168884 | TNIP2      | 1.02E+00 | 3.03E-14 | 2.91E-13 |
| ENSG00000085433 | WDR47      | 1.65E+00 | 3.06E-14 | 2.94E-13 |
| ENSG00000182866 | LCK        | 6.20E+00 | 3.27E-14 | 3.13E-13 |
| ENSG00000111961 | SASH1      | 1.81E+00 | 3.33E-14 | 3.19E-13 |
| ENSG00000238045 | AC009133.1 | 6.23E+00 | 3.34E-14 | 3.20E-13 |
| ENSG00000163683 | SMIM14     | 1.69E+00 | 3.62E-14 | 3.46E-13 |
| ENSG00000130363 | RSPH3      | 1.72E+00 | 3.68E-14 | 3.52E-13 |
| ENSG00000129450 | SIGLEC9    | 6.87E+00 | 3.73E-14 | 3.56E-13 |
| ENSG00000164125 | GASK1B     | 2.32E+00 | 3.87E-14 | 3.69E-13 |
| ENSG00000131015 | ULBP2      | 2.19E+00 | 3.90E-14 | 3.71E-13 |
| ENSG00000115884 | SDC1       | 1.85E+00 | 3.91E-14 | 3.73E-13 |
| ENSG00000118898 | PPL        | 6.40E+00 | 3.95E-14 | 3.76E-13 |
| ENSG00000177380 | PPFIA3     | 1.99E+00 | 4.09E-14 | 3.89E-13 |
| ENSG00000196730 | DAPK1      | 3.15E+00 | 4.19E-14 | 3.98E-13 |
| ENSG00000204389 | HSPA1A     | 1.03E+00 | 4.29E-14 | 4.07E-13 |
| ENSG00000167797 | CDK2AP2    | 1.40E+00 | 4.34E-14 | 4.12E-13 |
| ENSG00000167549 | CORO6      | 4.09E+00 | 4.44E-14 | 4.21E-13 |
| ENSG00000065000 | AP3D1      | 1.31E+00 | 4.56E-14 | 4.32E-13 |
| ENSG00000245146 | MALINC1    | 3.83E+00 | 4.75E-14 | 4.49E-13 |
| ENSG00000138083 | SIX3       | 7.08E+00 | 5.00E-14 | 4.72E-13 |
| ENSG00000136274 | NACAD      | 1.88E+00 | 5.14E-14 | 4.85E-13 |
| ENSG00000181222 | POLR2A     | 1.17E+00 | 5.16E-14 | 4.87E-13 |
| ENSG00000186648 | CARMIL3    | 6.06E+00 | 5.30E-14 | 5.00E-13 |
| ENSG00000169696 | ASPSCR1    | 1.84E+00 | 6.10E-14 | 5.73E-13 |
| ENSG00000066027 | PPP2R5A    | 1.47E+00 | 6.13E-14 | 5.76E-13 |
| ENSG00000104881 | PPP1R13L   | 1.33E+00 | 6.14E-14 | 5.77E-13 |
| ENSG00000167861 | HID1       | 6.69E+00 | 6.26E-14 | 5.87E-13 |
| ENSG00000087494 | PTHLH      | 3.31E+00 | 6.41E-14 | 6.01E-13 |
| ENSG00000054179 | ENTPD2     | 4.05E+00 | 6.48E-14 | 6.08E-13 |
| ENSG00000186204 | CYP4F12    | 6.85E+00 | 7.55E-14 | 7.05E-13 |
| ENSG00000166473 | PKD1L2     | 5.60E+00 | 8.11E-14 | 7.56E-13 |
| ENSG00000175470 | PPP2R2D    | 1.08E+00 | 8.11E-14 | 7.56E-13 |
| ENSG00000178934 | LGALS7B    | 6.74E+00 | 8.40E-14 | 7.81E-13 |
| ENSG00000160712 | IL6R       | 2.36E+00 | 8.55E-14 | 7.95E-13 |

|                 |            |          |          |          |
|-----------------|------------|----------|----------|----------|
| ENSG00000124212 | PTGIS      | 6.12E+00 | 8.92E-14 | 8.29E-13 |
| ENSG00000066629 | EML1       | 6.66E+00 | 8.94E-14 | 8.31E-13 |
| ENSG00000197774 | EME2       | 2.25E+00 | 9.16E-14 | 8.50E-13 |
| ENSG00000163132 | MSX1       | 1.47E+00 | 9.19E-14 | 8.52E-13 |
| ENSG00000159224 | GIP        | 5.23E+00 | 9.71E-14 | 8.99E-13 |
| ENSG00000162723 | SLAMF9     | 6.94E+00 | 9.88E-14 | 9.13E-13 |
| ENSG00000229314 | ORM1       | 6.54E+00 | 1.04E-13 | 9.60E-13 |
| ENSG00000101470 | TNNC2      | 3.91E+00 | 1.05E-13 | 9.73E-13 |
| ENSG00000125144 | MT1G       | 7.03E+00 | 1.20E-13 | 1.11E-12 |
| ENSG00000129990 | SYT5       | 6.59E+00 | 1.23E-13 | 1.13E-12 |
| ENSG00000160703 | NLRX1      | 2.13E+00 | 1.25E-13 | 1.15E-12 |
| ENSG00000163694 | RBM47      | 1.78E+00 | 1.26E-13 | 1.16E-12 |
| ENSG00000149577 | SIDT2      | 1.78E+00 | 1.36E-13 | 1.24E-12 |
| ENSG00000220201 | ZGLP1      | 2.26E+00 | 1.36E-13 | 1.25E-12 |
| ENSG00000126603 | GLIS2      | 1.95E+00 | 1.44E-13 | 1.32E-12 |
| ENSG00000081277 | PKP1       | 7.17E+00 | 1.46E-13 | 1.33E-12 |
| ENSG00000170271 | FAXDC2     | 4.87E+00 | 1.47E-13 | 1.34E-12 |
| ENSG00000108849 | PPY        | 6.16E+00 | 1.48E-13 | 1.35E-12 |
| ENSG00000247596 | TWF2       | 1.45E+00 | 1.53E-13 | 1.40E-12 |
| ENSG00000104413 | ESRP1      | 4.49E+00 | 1.58E-13 | 1.43E-12 |
| ENSG00000141736 | ERBB2      | 1.26E+00 | 1.58E-13 | 1.43E-12 |
| ENSG00000172819 | RARG       | 1.70E+00 | 1.59E-13 | 1.45E-12 |
| ENSG00000155066 | PROM2      | 6.46E+00 | 1.60E-13 | 1.45E-12 |
| ENSG00000164463 | CREBRF     | 1.77E+00 | 1.61E-13 | 1.46E-12 |
| ENSG00000154133 | ROBO4      | 3.34E+00 | 1.62E-13 | 1.47E-12 |
| ENSG00000188897 | AC099489.1 | 6.49E+00 | 1.67E-13 | 1.51E-12 |
| ENSG00000104497 | SNX16      | 1.03E+00 | 1.68E-13 | 1.52E-12 |
| ENSG00000178773 | CPNE7      | 2.85E+00 | 1.73E-13 | 1.56E-12 |
| ENSG00000132517 | SLC52A1    | 3.99E+00 | 1.73E-13 | 1.57E-12 |
| ENSG00000162783 | IER5       | 1.22E+00 | 1.77E-13 | 1.60E-12 |
| ENSG00000117983 | MUC5B      | 6.59E+00 | 1.98E-13 | 1.79E-12 |
| ENSG00000107147 | KCNT1      | 6.81E+00 | 2.20E-13 | 1.99E-12 |
| ENSG00000125850 | OVOL2      | 6.61E+00 | 2.22E-13 | 2.00E-12 |
| ENSG00000162511 | LAPTM5     | 4.08E+00 | 2.29E-13 | 2.07E-12 |
| ENSG00000120899 | PTK2B      | 2.36E+00 | 2.31E-13 | 2.08E-12 |
| ENSG00000177106 | EPS8L2     | 1.24E+00 | 2.42E-13 | 2.18E-12 |
| ENSG00000182858 | ALG12      | 1.21E+00 | 2.52E-13 | 2.26E-12 |
| ENSG00000283632 | EXOC3L2    | 6.11E+00 | 2.57E-13 | 2.31E-12 |
| ENSG00000107175 | CREB3      | 1.38E+00 | 2.61E-13 | 2.34E-12 |
| ENSG00000105085 | MED26      | 1.19E+00 | 2.62E-13 | 2.34E-12 |
| ENSG00000124302 | CHST8      | 6.39E+00 | 2.65E-13 | 2.38E-12 |
| ENSG00000168546 | GFRA2      | 7.20E+00 | 2.76E-13 | 2.47E-12 |
| ENSG00000173083 | HPSE       | 2.83E+00 | 2.79E-13 | 2.49E-12 |
| ENSG00000188770 | OPTC       | 6.79E+00 | 2.83E-13 | 2.53E-12 |
| ENSG00000112782 | CLIC5      | 6.72E+00 | 2.90E-13 | 2.59E-12 |

|                 |           |          |          |          |
|-----------------|-----------|----------|----------|----------|
| ENSG00000168591 | TMUB2     | 1.14E+00 | 3.06E-13 | 2.72E-12 |
| ENSG00000100109 | TFIP11    | 1.20E+00 | 3.11E-13 | 2.77E-12 |
| ENSG00000188760 | TMEM198   | 3.06E+00 | 3.34E-13 | 2.96E-12 |
| ENSG00000116525 | TRIM62    | 1.40E+00 | 3.49E-13 | 3.09E-12 |
| ENSG00000074211 | PPP2R2C   | 5.24E+00 | 3.62E-13 | 3.21E-12 |
| ENSG00000002726 | AOC1      | 6.04E+00 | 3.64E-13 | 3.22E-12 |
| ENSG00000122490 | SLC66A2   | 1.30E+00 | 3.67E-13 | 3.24E-12 |
| ENSG00000134955 | SLC37A2   | 3.46E+00 | 3.77E-13 | 3.33E-12 |
| ENSG00000101276 | SLC52A3   | 6.87E+00 | 3.80E-13 | 3.35E-12 |
| ENSG00000039068 | CDH1      | 5.46E+00 | 3.87E-13 | 3.41E-12 |
| ENSG00000205076 | LGALS7    | 7.31E+00 | 4.10E-13 | 3.61E-12 |
| ENSG00000136928 | GABBR2    | 4.85E+00 | 4.41E-13 | 3.88E-12 |
| ENSG00000108828 | VAT1      | 1.07E+00 | 4.51E-13 | 3.97E-12 |
| ENSG00000159023 | EPB41     | 1.57E+00 | 4.56E-13 | 4.01E-12 |
| ENSG00000054116 | TRAPPC3   | 1.26E+00 | 4.63E-13 | 4.07E-12 |
| ENSG00000178685 | PARP10    | 1.99E+00 | 4.72E-13 | 4.14E-12 |
| ENSG00000006453 | BAIAP2L1  | 1.02E+00 | 4.79E-13 | 4.20E-12 |
| ENSG00000156427 | FGF18     | 3.39E+00 | 4.93E-13 | 4.32E-12 |
| ENSG00000117139 | KDM5B     | 1.51E+00 | 5.36E-13 | 4.69E-12 |
| ENSG00000142327 | RNPEPL1   | 2.11E+00 | 5.53E-13 | 4.83E-12 |
| ENSG00000145349 | CAMK2D    | 1.85E+00 | 5.75E-13 | 5.02E-12 |
| ENSG00000185024 | BRF1      | 1.49E+00 | 5.86E-13 | 5.12E-12 |
| ENSG00000231826 | LINC01819 | 6.66E+00 | 5.89E-13 | 5.14E-12 |
| ENSG00000182175 | RGMA      | 5.15E+00 | 5.92E-13 | 5.16E-12 |
| ENSG00000266714 | MYO15B    | 4.81E+00 | 6.24E-13 | 5.43E-12 |
| ENSG00000143858 | SYT2      | 6.88E+00 | 6.30E-13 | 5.48E-12 |
| ENSG00000144230 | GPR17     | 6.80E+00 | 6.71E-13 | 5.82E-12 |
| ENSG00000184792 | OSBP2     | 1.81E+00 | 6.72E-13 | 5.83E-12 |
| ENSG00000160801 | PTH1R     | 6.60E+00 | 7.39E-13 | 6.40E-12 |
| ENSG00000149548 | CCDC15    | 1.18E+00 | 7.41E-13 | 6.42E-12 |
| ENSG00000103042 | SLC38A7   | 1.03E+00 | 7.42E-13 | 6.43E-12 |
| ENSG00000183087 | GAS6      | 1.15E+00 | 7.59E-13 | 6.56E-12 |
| ENSG00000132740 | IGHMBP2   | 1.26E+00 | 7.68E-13 | 6.64E-12 |
| ENSG00000105251 | SHD       | 6.89E+00 | 7.77E-13 | 6.71E-12 |
| ENSG00000270765 | GAS2L2    | 7.23E+00 | 7.93E-13 | 6.84E-12 |
| ENSG00000162496 | DHRS3     | 1.56E+00 | 8.20E-13 | 7.07E-12 |
| ENSG00000086666 | ZFAND6    | 1.02E+00 | 8.22E-13 | 7.09E-12 |
| ENSG00000169926 | KLF13     | 2.21E+00 | 8.31E-13 | 7.15E-12 |
| ENSG00000135253 | KCP       | 5.99E+00 | 8.40E-13 | 7.23E-12 |
| ENSG00000141458 | NPC1      | 1.13E+00 | 8.54E-13 | 7.35E-12 |
| ENSG00000133131 | MORC4     | 1.41E+00 | 8.60E-13 | 7.39E-12 |
| ENSG00000072954 | TMEM38A   | 2.86E+00 | 8.61E-13 | 7.40E-12 |
| ENSG00000128928 | IVD       | 1.14E+00 | 8.85E-13 | 7.59E-12 |
| ENSG00000183049 | CAMK1D    | 1.91E+00 | 9.41E-13 | 8.04E-12 |
| ENSG00000137166 | FOXP4     | 1.40E+00 | 9.48E-13 | 8.09E-12 |



|                 |           |          |          |          |
|-----------------|-----------|----------|----------|----------|
| ENSG00000198156 | NPIPB6    | 6.38E+00 | 9.61E-13 | 8.19E-12 |
| ENSG00000104825 | NFKBIB    | 1.43E+00 | 9.71E-13 | 8.27E-12 |
| ENSG00000115155 | OTOF      | 6.35E+00 | 9.94E-13 | 8.46E-12 |
| ENSG00000175854 | SWI5      | 1.39E+00 | 1.00E-12 | 8.50E-12 |
| ENSG00000100314 | CABP7     | 4.96E+00 | 1.02E-12 | 8.69E-12 |
| ENSG00000125746 | EML2      | 4.36E+00 | 1.02E-12 | 8.69E-12 |
| ENSG00000181626 | ANKRD62   | 6.31E+00 | 1.11E-12 | 9.41E-12 |
| ENSG00000185291 | IL3RA     | 6.58E+00 | 1.13E-12 | 9.54E-12 |
| ENSG00000150967 | ABCB9     | 2.07E+00 | 1.15E-12 | 9.70E-12 |
| ENSG00000175265 | GOLGA8A   | 1.22E+00 | 1.17E-12 | 9.90E-12 |
| ENSG00000137942 | FBNP1L    | 1.13E+00 | 1.18E-12 | 9.97E-12 |
| ENSG00000099785 | MARCH2    | 2.54E+00 | 1.20E-12 | 1.01E-11 |
| ENSG00000106991 | ENG       | 1.73E+00 | 1.20E-12 | 1.02E-11 |
| ENSG00000136848 | DAB2IP    | 1.39E+00 | 1.23E-12 | 1.04E-11 |
| ENSG00000173621 | LRFN4     | 1.06E+00 | 1.24E-12 | 1.05E-11 |
| ENSG00000167191 | GPRC5B    | 1.74E+00 | 1.25E-12 | 1.05E-11 |
| ENSG00000126391 | FRMD8     | 1.48E+00 | 1.25E-12 | 1.05E-11 |
| ENSG00000118292 | C1orf54   | 4.01E+00 | 1.27E-12 | 1.07E-11 |
| ENSG00000167785 | ZNF558    | 1.87E+00 | 1.28E-12 | 1.08E-11 |
| ENSG00000183578 | TNFAIP8L3 | 4.32E+00 | 1.30E-12 | 1.09E-11 |
| ENSG00000224051 | CPTP      | 1.77E+00 | 1.34E-12 | 1.13E-11 |
| ENSG00000167723 | TRPV3     | 6.44E+00 | 1.34E-12 | 1.13E-11 |
| ENSG00000105499 | PLA2G4C   | 3.14E+00 | 1.35E-12 | 1.13E-11 |
| ENSG00000154429 | CCSAP     | 1.07E+00 | 1.43E-12 | 1.19E-11 |
| ENSG00000063241 | ISOC2     | 1.90E+00 | 1.44E-12 | 1.20E-11 |
| ENSG00000119541 | VPS4B     | 1.07E+00 | 1.49E-12 | 1.24E-11 |
| ENSG00000155366 | RHOC      | 1.92E+00 | 1.56E-12 | 1.30E-11 |
| ENSG00000157514 | TSC22D3   | 2.22E+00 | 1.61E-12 | 1.34E-11 |
| ENSG00000104808 | DHDH      | 3.70E+00 | 1.62E-12 | 1.35E-11 |
| ENSG00000006283 | CACNA1G   | 3.51E+00 | 1.81E-12 | 1.50E-11 |
| ENSG00000116035 | VAX2      | 5.48E+00 | 1.82E-12 | 1.52E-11 |
| ENSG00000032219 | ARID4A    | 1.11E+00 | 1.84E-12 | 1.53E-11 |
| ENSG00000141854 | MISP3     | 4.65E+00 | 1.85E-12 | 1.53E-11 |
| ENSG00000070413 | DGCR2     | 1.32E+00 | 1.92E-12 | 1.59E-11 |
| ENSG00000130270 | ATP8B3    | 2.72E+00 | 1.93E-12 | 1.60E-11 |
| ENSG00000125898 | FAM110A   | 1.58E+00 | 1.95E-12 | 1.62E-11 |
| ENSG00000197608 | ZNF841    | 2.41E+00 | 2.08E-12 | 1.72E-11 |
| ENSG00000156050 | FAM161B   | 2.03E+00 | 2.15E-12 | 1.77E-11 |
| ENSG00000167972 | ABCA3     | 3.50E+00 | 2.16E-12 | 1.78E-11 |
| ENSG00000154822 | PLCL2     | 3.27E+00 | 2.40E-12 | 1.98E-11 |
| ENSG00000187094 | CCK       | 6.68E+00 | 2.42E-12 | 1.99E-11 |
| ENSG00000273604 | EPOP      | 1.43E+00 | 2.46E-12 | 2.02E-11 |
| ENSG00000131100 | ATP6V1E1  | 1.26E+00 | 2.47E-12 | 2.03E-11 |
| ENSG00000140279 | DUOX2     | 6.79E+00 | 2.50E-12 | 2.05E-11 |
| ENSG00000163293 | NIPAL1    | 1.51E+00 | 2.52E-12 | 2.07E-11 |

|                 |            |          |          |          |
|-----------------|------------|----------|----------|----------|
| ENSG00000244242 | IFITM10    | 6.25E+00 | 2.54E-12 | 2.09E-11 |
| ENSG00000169896 | ITGAM      | 3.85E+00 | 2.57E-12 | 2.11E-11 |
| ENSG00000170835 | CEL        | 4.63E+00 | 2.62E-12 | 2.14E-11 |
| ENSG00000180448 | ARHGAP45   | 3.53E+00 | 2.93E-12 | 2.40E-11 |
| ENSG00000103528 | SYT17      | 6.42E+00 | 2.96E-12 | 2.42E-11 |
| ENSG00000187608 | ISG15      | 2.28E+00 | 2.97E-12 | 2.43E-11 |
| ENSG00000224614 | TNK2-AS1   | 6.62E+00 | 3.05E-12 | 2.49E-11 |
| ENSG00000108823 | SGCA       | 5.56E+00 | 3.14E-12 | 2.57E-11 |
| ENSG00000109472 | CPE        | 1.13E+00 | 3.18E-12 | 2.60E-11 |
| ENSG00000129219 | PLD2       | 1.65E+00 | 3.19E-12 | 2.61E-11 |
| ENSG00000072134 | EPN2       | 1.73E+00 | 3.21E-12 | 2.62E-11 |
| ENSG00000169877 | AHSP       | 6.89E+00 | 3.26E-12 | 2.66E-11 |
| ENSG00000103249 | CLCN7      | 1.08E+00 | 3.31E-12 | 2.70E-11 |
| ENSG00000226287 | TMEM191A   | 3.77E+00 | 3.34E-12 | 2.72E-11 |
| ENSG00000226812 | AL117382.1 | 6.24E+00 | 3.38E-12 | 2.75E-11 |
| ENSG00000071242 | RPS6KA2    | 2.33E+00 | 3.50E-12 | 2.84E-11 |
| ENSG00000047346 | FAM214A    | 2.16E+00 | 3.60E-12 | 2.92E-11 |
| ENSG00000162910 | MRPL55     | 1.80E+00 | 3.74E-12 | 3.04E-11 |
| ENSG00000171443 | ZNF524     | 2.61E+00 | 4.12E-12 | 3.33E-11 |
| ENSG00000197122 | SRC        | 1.06E+00 | 4.17E-12 | 3.37E-11 |
| ENSG00000170385 | SLC30A1    | 1.46E+00 | 4.43E-12 | 3.58E-11 |
| ENSG00000103264 | FBXO31     | 1.15E+00 | 4.51E-12 | 3.63E-11 |
| ENSG00000135363 | LMO2       | 5.33E+00 | 4.85E-12 | 3.90E-11 |
| ENSG00000103496 | STX4       | 1.17E+00 | 4.86E-12 | 3.90E-11 |
| ENSG00000164081 | TEX264     | 1.74E+00 | 4.92E-12 | 3.95E-11 |
| ENSG00000134996 | OSTF1      | 1.43E+00 | 5.04E-12 | 4.05E-11 |
| ENSG00000221986 | MYBPHL     | 6.24E+00 | 5.09E-12 | 4.08E-11 |
| ENSG00000109501 | WFS1       | 1.53E+00 | 5.12E-12 | 4.10E-11 |
| ENSG00000211584 | SLC48A1    | 2.61E+00 | 5.12E-12 | 4.10E-11 |
| ENSG00000162591 | MEGF6      | 1.51E+00 | 5.21E-12 | 4.17E-11 |
| ENSG00000228705 | LINC00659  | 6.77E+00 | 5.49E-12 | 4.38E-11 |
| ENSG00000049089 | COL9A2     | 3.67E+00 | 5.55E-12 | 4.43E-11 |
| ENSG00000198513 | ATL1       | 2.65E+00 | 5.68E-12 | 4.52E-11 |
| ENSG00000055163 | CYFIP2     | 2.17E+00 | 5.75E-12 | 4.58E-11 |
| ENSG00000187091 | PLCD1      | 2.10E+00 | 5.75E-12 | 4.58E-11 |
| ENSG00000287431 | AC027601.6 | 2.76E+00 | 5.84E-12 | 4.64E-11 |
| ENSG00000166147 | FBN1       | 1.27E+00 | 6.06E-12 | 4.82E-11 |
| ENSG00000226490 | AC138647.1 | 6.37E+00 | 6.28E-12 | 4.98E-11 |
| ENSG00000066056 | TIE1       | 4.37E+00 | 6.47E-12 | 5.13E-11 |
| ENSG00000090661 | CERS4      | 2.09E+00 | 6.48E-12 | 5.13E-11 |
| ENSG00000026103 | FAS        | 2.25E+00 | 6.49E-12 | 5.14E-11 |
| ENSG00000100241 | SBF1       | 1.46E+00 | 6.75E-12 | 5.34E-11 |
| ENSG00000159307 | SCUBE1     | 6.70E+00 | 7.22E-12 | 5.70E-11 |
| ENSG00000109686 | SH3D19     | 1.75E+00 | 7.74E-12 | 6.10E-11 |
| ENSG00000261804 | AC007342.4 | 6.51E+00 | 7.80E-12 | 6.14E-11 |

|                 |            |          |          |          |
|-----------------|------------|----------|----------|----------|
| ENSG00000143816 | WNT9A      | 2.92E+00 | 7.95E-12 | 6.26E-11 |
| ENSG00000175315 | CST6       | 6.68E+00 | 7.99E-12 | 6.28E-11 |
| ENSG00000130054 | FAM155B    | 3.67E+00 | 8.17E-12 | 6.42E-11 |
| ENSG00000158552 | ZFAND2B    | 1.49E+00 | 8.64E-12 | 6.78E-11 |
| ENSG00000167740 | CYB5D2     | 1.67E+00 | 8.70E-12 | 6.83E-11 |
| ENSG00000182687 | GALR2      | 3.71E+00 | 8.83E-12 | 6.92E-11 |
| ENSG00000169118 | CSNK1G1    | 1.21E+00 | 8.88E-12 | 6.95E-11 |
| ENSG00000169972 | PUSL1      | 1.75E+00 | 8.96E-12 | 7.01E-11 |
| ENSG00000196502 | SULT1A1    | 3.03E+00 | 9.00E-12 | 7.04E-11 |
| ENSG00000103150 | MLYCD      | 1.84E+00 | 9.03E-12 | 7.05E-11 |
| ENSG00000100604 | CHGA       | 6.50E+00 | 9.37E-12 | 7.31E-11 |
| ENSG00000204882 | GPR20      | 6.57E+00 | 9.39E-12 | 7.32E-11 |
| ENSG00000184574 | LPAR5      | 5.49E+00 | 9.63E-12 | 7.50E-11 |
| ENSG00000116299 | KIAA1324   | 2.91E+00 | 1.01E-11 | 7.87E-11 |
| ENSG00000109927 | TECTA      | 7.07E+00 | 1.02E-11 | 7.94E-11 |
| ENSG00000115839 | RAB3GAP1   | 1.03E+00 | 1.04E-11 | 8.06E-11 |
| ENSG00000160972 | PPP1R16A   | 1.19E+00 | 1.04E-11 | 8.07E-11 |
| ENSG00000245848 | CEBPA      | 3.39E+00 | 1.04E-11 | 8.08E-11 |
| ENSG00000163273 | NPPC       | 4.05E+00 | 1.10E-11 | 8.53E-11 |
| ENSG00000213904 | LIPE-AS1   | 3.30E+00 | 1.10E-11 | 8.55E-11 |
| ENSG00000107331 | ABCA2      | 1.58E+00 | 1.11E-11 | 8.62E-11 |
| ENSG00000143147 | GPR161     | 1.18E+00 | 1.11E-11 | 8.63E-11 |
| ENSG00000277363 | SRCIN1     | 2.72E+00 | 1.17E-11 | 9.04E-11 |
| ENSG00000186115 | CYP4F2     | 5.38E+00 | 1.17E-11 | 9.10E-11 |
| ENSG00000099812 | MISP       | 4.59E+00 | 1.18E-11 | 9.10E-11 |
| ENSG00000148158 | SNX30      | 1.57E+00 | 1.47E-11 | 1.13E-10 |
| ENSG00000117308 | GALE       | 1.76E+00 | 1.47E-11 | 1.13E-10 |
| ENSG00000139044 | B4GALNT3   | 3.19E+00 | 1.47E-11 | 1.13E-10 |
| ENSG00000142733 | MAP3K6     | 1.64E+00 | 1.50E-11 | 1.15E-10 |
| ENSG00000120278 | PLEKHG1    | 4.28E+00 | 1.53E-11 | 1.18E-10 |
| ENSG00000172458 | IL17D      | 4.13E+00 | 1.55E-11 | 1.19E-10 |
| ENSG00000196498 | NCOR2      | 1.15E+00 | 1.58E-11 | 1.21E-10 |
| ENSG00000092067 | CEBPE      | 6.78E+00 | 1.63E-11 | 1.25E-10 |
| ENSG00000145113 | MUC4       | 6.52E+00 | 1.65E-11 | 1.26E-10 |
| ENSG00000132906 | CASP9      | 2.27E+00 | 1.68E-11 | 1.28E-10 |
| ENSG00000156675 | RAB11FIP1  | 1.23E+00 | 1.77E-11 | 1.35E-10 |
| ENSG00000116786 | PLEKHM2    | 1.02E+00 | 1.78E-11 | 1.35E-10 |
| ENSG00000275395 | FCGBP      | 6.29E+00 | 1.82E-11 | 1.38E-10 |
| ENSG00000135439 | AGAP2      | 6.85E+00 | 1.89E-11 | 1.43E-10 |
| ENSG00000267440 | LINC02594  | 6.90E+00 | 1.94E-11 | 1.47E-10 |
| ENSG00000273619 | AL121832.2 | 2.63E+00 | 1.95E-11 | 1.48E-10 |
| ENSG00000165105 | RASEF      | 2.00E+00 | 1.97E-11 | 1.50E-10 |
| ENSG00000171446 | KRT27      | 6.39E+00 | 2.00E-11 | 1.52E-10 |
| ENSG00000124159 | MATN4      | 3.72E+00 | 2.01E-11 | 1.52E-10 |
| ENSG00000174684 | B4GAT1     | 1.55E+00 | 2.09E-11 | 1.58E-10 |

|                 |            |          |          |          |
|-----------------|------------|----------|----------|----------|
| ENSG00000105612 | DNASE2     | 1.25E+00 | 2.11E-11 | 1.59E-10 |
| ENSG00000150782 | IL18       | 4.56E+00 | 2.11E-11 | 1.59E-10 |
| ENSG00000250934 | AC016924.1 | 6.25E+00 | 2.11E-11 | 1.59E-10 |
| ENSG00000105464 | GRIN2D     | 6.30E+00 | 2.15E-11 | 1.62E-10 |
| ENSG00000160741 | CRTC2      | 1.04E+00 | 2.18E-11 | 1.64E-10 |
| ENSG00000197296 | FITM2      | 1.07E+00 | 2.21E-11 | 1.67E-10 |
| ENSG00000158109 | TPRG1L     | 1.62E+00 | 2.23E-11 | 1.68E-10 |
| ENSG00000196734 | LCE1B      | 5.56E+00 | 2.25E-11 | 1.69E-10 |
| ENSG00000204516 | MICB       | 1.40E+00 | 2.28E-11 | 1.71E-10 |
| ENSG00000007866 | TEAD3      | 1.45E+00 | 2.28E-11 | 1.72E-10 |
| ENSG00000160471 | COX6B2     | 5.16E+00 | 2.30E-11 | 1.73E-10 |
| ENSG00000198780 | FAM169A    | 2.19E+00 | 2.31E-11 | 1.73E-10 |
| ENSG00000148925 | BTBD10     | 1.28E+00 | 2.32E-11 | 1.74E-10 |
| ENSG00000116667 | C1orf21    | 2.47E+00 | 2.39E-11 | 1.79E-10 |
| ENSG00000169242 | EFNA1      | 1.26E+00 | 2.39E-11 | 1.79E-10 |
| ENSG00000105289 | TJP3       | 6.35E+00 | 2.43E-11 | 1.82E-10 |
| ENSG00000197177 | ADGRA1     | 6.25E+00 | 2.48E-11 | 1.85E-10 |
| ENSG00000159579 | RSPRY1     | 1.16E+00 | 2.51E-11 | 1.88E-10 |
| ENSG00000165474 | GJB2       | 4.97E+00 | 2.57E-11 | 1.92E-10 |
| ENSG00000163975 | MELTF      | 1.16E+00 | 2.67E-11 | 1.99E-10 |
| ENSG00000091490 | SEL1L3     | 1.61E+00 | 2.73E-11 | 2.04E-10 |
| ENSG00000189077 | TMEM120A   | 1.93E+00 | 2.81E-11 | 2.09E-10 |
| ENSG00000243225 | AC007686.1 | 2.13E+00 | 2.87E-11 | 2.14E-10 |
| ENSG00000198805 | PNP        | 1.01E+00 | 2.90E-11 | 2.16E-10 |
| ENSG00000167536 | DHRS13     | 2.16E+00 | 2.98E-11 | 2.21E-10 |
| ENSG00000141753 | IGFBP4     | 1.09E+00 | 3.02E-11 | 2.24E-10 |
| ENSG00000130508 | PXDN       | 1.20E+00 | 3.08E-11 | 2.28E-10 |
| ENSG00000166589 | CDH16      | 5.81E+00 | 3.08E-11 | 2.28E-10 |
| ENSG00000104237 | RP1        | 6.06E+00 | 3.17E-11 | 2.35E-10 |
| ENSG00000109586 | GALNT7     | 1.17E+00 | 3.17E-11 | 2.35E-10 |
| ENSG00000163220 | S100A9     | 6.04E+00 | 3.21E-11 | 2.38E-10 |
| ENSG00000106617 | PRKAG2     | 1.41E+00 | 3.22E-11 | 2.39E-10 |
| ENSG00000189337 | KAZN       | 2.00E+00 | 3.31E-11 | 2.44E-10 |
| ENSG00000172977 | KAT5       | 1.25E+00 | 3.33E-11 | 2.46E-10 |
| ENSG00000151929 | BAG3       | 1.15E+00 | 3.33E-11 | 2.46E-10 |
| ENSG00000040487 | SLC66A1    | 1.37E+00 | 3.37E-11 | 2.48E-10 |
| ENSG00000171503 | ETFDH      | 1.35E+00 | 3.43E-11 | 2.53E-10 |
| ENSG00000130706 | ADRM1      | 1.35E+00 | 3.63E-11 | 2.68E-10 |
| ENSG00000170369 | CST2       | 6.68E+00 | 3.64E-11 | 2.68E-10 |
| ENSG00000156983 | BRPF1      | 1.18E+00 | 3.78E-11 | 2.78E-10 |
| ENSG00000133142 | TCEAL4     | 1.10E+00 | 3.85E-11 | 2.83E-10 |
| ENSG00000078687 | TNRC6C     | 1.34E+00 | 3.86E-11 | 2.83E-10 |
| ENSG00000188177 | ZC3H6      | 1.94E+00 | 3.96E-11 | 2.91E-10 |
| ENSG00000250920 | AC105460.1 | 6.26E+00 | 4.06E-11 | 2.98E-10 |
| ENSG00000261143 | ADAMTS7P3  | 6.59E+00 | 4.06E-11 | 2.98E-10 |

|                 |            |          |          |          |
|-----------------|------------|----------|----------|----------|
| ENSG00000104866 | PPP1R37    | 1.52E+00 | 4.07E-11 | 2.99E-10 |
| ENSG00000079691 | CARMIL1    | 1.34E+00 | 4.36E-11 | 3.19E-10 |
| ENSG00000059804 | SLC2A3     | 1.09E+00 | 4.40E-11 | 3.22E-10 |
| ENSG00000068615 | REEP1      | 2.48E+00 | 4.45E-11 | 3.26E-10 |
| ENSG00000170426 | SDR9C7     | 6.72E+00 | 4.51E-11 | 3.30E-10 |
| ENSG00000130600 | H19        | 6.09E+00 | 4.54E-11 | 3.32E-10 |
| ENSG00000223729 | LINC02247  | 6.39E+00 | 4.68E-11 | 3.41E-10 |
| ENSG00000169692 | AGPAT2     | 1.07E+00 | 4.73E-11 | 3.45E-10 |
| ENSG00000178623 | GPR35      | 6.28E+00 | 4.82E-11 | 3.51E-10 |
| ENSG00000251095 | AC093866.1 | 4.33E+00 | 4.85E-11 | 3.53E-10 |
| ENSG00000090339 | ICAM1      | 1.11E+00 | 5.04E-11 | 3.67E-10 |
| ENSG00000122592 | HOXA7      | 1.55E+00 | 5.17E-11 | 3.76E-10 |
| ENSG00000156475 | PPP2R2B    | 6.37E+00 | 5.18E-11 | 3.77E-10 |
| ENSG00000168907 | PLA2G4F    | 6.20E+00 | 5.42E-11 | 3.94E-10 |
| ENSG00000136286 | MYO1G      | 6.72E+00 | 5.45E-11 | 3.96E-10 |
| ENSG00000156574 | NODAL      | 5.98E+00 | 5.45E-11 | 3.96E-10 |
| ENSG00000213977 | TAX1BP3    | 1.28E+00 | 5.60E-11 | 4.06E-10 |
| ENSG00000126016 | AMOT       | 4.69E+00 | 5.77E-11 | 4.18E-10 |
| ENSG00000140678 | ITGAX      | 3.61E+00 | 5.83E-11 | 4.22E-10 |
| ENSG00000185909 | KLHDC8B    | 1.24E+00 | 6.17E-11 | 4.46E-10 |
| ENSG00000198382 | UVRAG      | 1.13E+00 | 6.28E-11 | 4.54E-10 |
| ENSG00000148290 | SURF1      | 1.01E+00 | 6.40E-11 | 4.62E-10 |
| ENSG00000166484 | MAPK7      | 1.48E+00 | 6.47E-11 | 4.67E-10 |
| ENSG00000152953 | STK32B     | 1.20E+00 | 6.51E-11 | 4.70E-10 |
| ENSG00000105696 | TMEM59L    | 3.25E+00 | 6.58E-11 | 4.74E-10 |
| ENSG00000112033 | PPARD      | 1.04E+00 | 6.70E-11 | 4.83E-10 |
| ENSG00000138834 | MAPK8IP3   | 1.64E+00 | 6.72E-11 | 4.84E-10 |
| ENSG00000248690 | HAS2-AS1   | 3.10E+00 | 6.86E-11 | 4.94E-10 |
| ENSG00000162444 | RBP7       | 2.57E+00 | 6.86E-11 | 4.94E-10 |
| ENSG00000140332 | TLE3       | 1.00E+00 | 7.04E-11 | 5.06E-10 |
| ENSG00000132854 | KANK4      | 3.47E+00 | 7.20E-11 | 5.17E-10 |
| ENSG00000028277 | POU2F2     | 1.43E+00 | 7.27E-11 | 5.22E-10 |
| ENSG00000188505 | NCCRP1     | 6.08E+00 | 7.29E-11 | 5.23E-10 |
| ENSG00000182796 | TMEM198B   | 2.43E+00 | 7.35E-11 | 5.27E-10 |
| ENSG00000113742 | CPEB4      | 1.05E+00 | 7.46E-11 | 5.35E-10 |
| ENSG00000104833 | TUBB4A     | 4.13E+00 | 7.53E-11 | 5.39E-10 |
| ENSG00000123243 | ITIH5      | 4.86E+00 | 7.61E-11 | 5.45E-10 |
| ENSG00000267248 | AC025048.2 | 3.82E+00 | 7.69E-11 | 5.50E-10 |
| ENSG00000008300 | CELSR3     | 2.53E+00 | 8.02E-11 | 5.73E-10 |
| ENSG00000182612 | TSPAN10    | 3.40E+00 | 8.07E-11 | 5.76E-10 |
| ENSG00000154710 | RABGEF1    | 2.52E+00 | 8.10E-11 | 5.78E-10 |
| ENSG00000110274 | CEP164     | 1.42E+00 | 8.20E-11 | 5.85E-10 |
| ENSG00000157601 | MX1        | 3.45E+00 | 8.40E-11 | 5.99E-10 |
| ENSG00000133460 | SLC2A11    | 1.54E+00 | 8.41E-11 | 5.99E-10 |
| ENSG00000120860 | WASHC3     | 1.42E+00 | 8.43E-11 | 6.00E-10 |

|                 |            |          |          |          |
|-----------------|------------|----------|----------|----------|
| ENSG00000099994 | SUSD2      | 4.13E+00 | 8.67E-11 | 6.17E-10 |
| ENSG00000173805 | HAP1       | 2.98E+00 | 8.95E-11 | 6.36E-10 |
| ENSG00000101280 | ANGPT4     | 6.05E+00 | 8.97E-11 | 6.37E-10 |
| ENSG00000145990 | GFOD1      | 1.56E+00 | 9.25E-11 | 6.56E-10 |
| ENSG00000088726 | TMEM40     | 3.32E+00 | 9.88E-11 | 7.00E-10 |
| ENSG00000173175 | ADCY5      | 6.51E+00 | 9.89E-11 | 7.01E-10 |
| ENSG00000205356 | TECPR1     | 2.28E+00 | 1.00E-10 | 7.08E-10 |
| ENSG00000184232 | OAF        | 1.26E+00 | 1.00E-10 | 7.09E-10 |
| ENSG00000186481 | ANKRD20A5P | 2.16E+00 | 1.02E-10 | 7.20E-10 |
| ENSG00000227234 | SPANXB1    | 6.44E+00 | 1.04E-10 | 7.33E-10 |
| ENSG00000154099 | DNAAF1     | 7.28E+00 | 1.04E-10 | 7.34E-10 |
| ENSG00000131941 | RHPN2      | 1.27E+00 | 1.04E-10 | 7.35E-10 |
| ENSG00000081913 | PHLPP1     | 1.40E+00 | 1.07E-10 | 7.53E-10 |
| ENSG00000125966 | MMP24      | 2.47E+00 | 1.11E-10 | 7.82E-10 |
| ENSG00000174788 | PCP2       | 6.11E+00 | 1.11E-10 | 7.82E-10 |
| ENSG00000158062 | UBXN11     | 1.17E+00 | 1.20E-10 | 8.45E-10 |
| ENSG00000184811 | TRARG1     | 6.27E+00 | 1.24E-10 | 8.72E-10 |
| ENSG00000116977 | LGALS8     | 1.40E+00 | 1.34E-10 | 9.42E-10 |
| ENSG00000171310 | CHST11     | 1.59E+00 | 1.37E-10 | 9.63E-10 |
| ENSG00000165695 | AK8        | 4.05E+00 | 1.41E-10 | 9.87E-10 |
| ENSG00000105369 | CD79A      | 4.49E+00 | 1.43E-10 | 1.00E-09 |
| ENSG00000185485 | SDHAP1     | 1.65E+00 | 1.51E-10 | 1.06E-09 |
| ENSG00000180644 | PRF1       | 5.97E+00 | 1.52E-10 | 1.06E-09 |
| ENSG00000160284 | SPATC1L    | 1.57E+00 | 1.52E-10 | 1.06E-09 |
| ENSG00000167105 | TMEM92     | 5.59E+00 | 1.53E-10 | 1.07E-09 |
| ENSG00000196754 | S100A2     | 2.83E+00 | 1.56E-10 | 1.09E-09 |
| ENSG00000062524 | LTK        | 5.98E+00 | 1.59E-10 | 1.11E-09 |
| ENSG00000114738 | MAPKAPK3   | 1.56E+00 | 1.60E-10 | 1.11E-09 |
| ENSG00000168309 | FAM107A    | 6.73E+00 | 1.61E-10 | 1.12E-09 |
| ENSG00000164142 | FAM160A1   | 2.81E+00 | 1.61E-10 | 1.12E-09 |
| ENSG00000244734 | HBB        | 6.39E+00 | 1.69E-10 | 1.17E-09 |
| ENSG00000197355 | UAP1L1     | 1.85E+00 | 1.77E-10 | 1.23E-09 |
| ENSG00000125657 | TNFSF9     | 1.82E+00 | 1.82E-10 | 1.26E-09 |
| ENSG00000137478 | FCHSD2     | 1.36E+00 | 1.84E-10 | 1.27E-09 |
| ENSG00000099864 | PALM       | 2.13E+00 | 1.90E-10 | 1.31E-09 |
| ENSG00000161381 | PLXDC1     | 4.24E+00 | 2.06E-10 | 1.42E-09 |
| ENSG00000261371 | PECAM1     | 4.47E+00 | 2.14E-10 | 1.48E-09 |
| ENSG00000177984 | LCN15      | 5.81E+00 | 2.21E-10 | 1.52E-09 |
| ENSG00000085831 | TTC39A     | 4.91E+00 | 2.26E-10 | 1.55E-09 |
| ENSG00000171540 | OTP        | 5.22E+00 | 2.28E-10 | 1.57E-09 |
| ENSG00000011332 | DPF1       | 1.46E+00 | 2.41E-10 | 1.66E-09 |
| ENSG00000173702 | MUC13      | 5.98E+00 | 2.49E-10 | 1.71E-09 |
| ENSG00000088826 | SMOX       | 1.19E+00 | 2.49E-10 | 1.71E-09 |
| ENSG00000132274 | TRIM22     | 2.67E+00 | 2.58E-10 | 1.77E-09 |
| ENSG00000090061 | CCNK       | 1.37E+00 | 2.74E-10 | 1.87E-09 |

|                 |            |          |          |          |
|-----------------|------------|----------|----------|----------|
| ENSG00000185818 | NAT8L      | 1.65E+00 | 2.75E-10 | 1.88E-09 |
| ENSG00000184261 | KCNK12     | 6.16E+00 | 2.76E-10 | 1.88E-09 |
| ENSG00000110047 | EHD1       | 1.06E+00 | 2.79E-10 | 1.90E-09 |
| ENSG00000182472 | CAPN12     | 6.07E+00 | 2.80E-10 | 1.91E-09 |
| ENSG00000103888 | CEMIP      | 1.46E+00 | 2.81E-10 | 1.91E-09 |
| ENSG00000116761 | CTH        | 2.45E+00 | 2.97E-10 | 2.02E-09 |
| ENSG00000131634 | TMEM204    | 5.90E+00 | 3.00E-10 | 2.04E-09 |
| ENSG00000030110 | BAK1       | 1.57E+00 | 3.06E-10 | 2.08E-09 |
| ENSG00000166689 | PLEKHA7    | 4.36E+00 | 3.24E-10 | 2.19E-09 |
| ENSG00000263465 | SRSF8      | 1.83E+00 | 3.26E-10 | 2.21E-09 |
| ENSG00000204282 | TNRC6C-AS1 | 5.62E+00 | 3.27E-10 | 2.21E-09 |
| ENSG00000119986 | AVP11      | 1.91E+00 | 3.36E-10 | 2.27E-09 |
| ENSG00000214655 | ZSWIM8     | 1.10E+00 | 3.42E-10 | 2.31E-09 |
| ENSG00000143061 | IGSF3      | 1.88E+00 | 3.56E-10 | 2.40E-09 |
| ENSG00000161267 | BDH1       | 1.52E+00 | 3.60E-10 | 2.42E-09 |
| ENSG00000185033 | SEMA4B     | 1.46E+00 | 3.60E-10 | 2.43E-09 |
| ENSG00000039987 | BEST2      | 6.50E+00 | 3.65E-10 | 2.46E-09 |
| ENSG00000116668 | SWT1       | 2.44E+00 | 3.66E-10 | 2.46E-09 |
| ENSG00000179562 | GCC1       | 1.56E+00 | 3.66E-10 | 2.46E-09 |
| ENSG00000187764 | SEMA4D     | 1.88E+00 | 3.69E-10 | 2.48E-09 |
| ENSG00000137216 | TMEM63B    | 1.02E+00 | 3.73E-10 | 2.50E-09 |
| ENSG00000105516 | DBP        | 2.26E+00 | 3.77E-10 | 2.53E-09 |
| ENSG00000189190 | ZNF600     | 1.54E+00 | 3.82E-10 | 2.56E-09 |
| ENSG00000186564 | FOXD2      | 2.73E+00 | 3.82E-10 | 2.56E-09 |
| ENSG00000143669 | LYST       | 1.43E+00 | 3.88E-10 | 2.60E-09 |
| ENSG00000147206 | NXF3       | 6.75E+00 | 3.91E-10 | 2.62E-09 |
| ENSG00000198408 | OGA        | 1.17E+00 | 3.92E-10 | 2.63E-09 |
| ENSG00000177663 | IL17RA     | 1.11E+00 | 4.06E-10 | 2.72E-09 |
| ENSG00000154832 | CXXC1      | 1.20E+00 | 4.07E-10 | 2.73E-09 |
| ENSG00000171316 | CHD7       | 1.34E+00 | 4.07E-10 | 2.73E-09 |
| ENSG00000135116 | HRK        | 4.60E+00 | 4.14E-10 | 2.77E-09 |
| ENSG00000180769 | WDFY3-AS2  | 3.23E+00 | 4.16E-10 | 2.78E-09 |
| ENSG00000083838 | ZNF446     | 1.47E+00 | 4.18E-10 | 2.80E-09 |
| ENSG00000177432 | NAP1L5     | 2.46E+00 | 4.21E-10 | 2.81E-09 |
| ENSG00000197302 | ZNF720     | 1.30E+00 | 4.33E-10 | 2.89E-09 |
| ENSG00000123178 | SPRYD7     | 1.25E+00 | 4.75E-10 | 3.16E-09 |
| ENSG00000115459 | ELMOD3     | 1.87E+00 | 4.77E-10 | 3.18E-09 |
| ENSG00000103671 | TRIP4      | 1.16E+00 | 4.80E-10 | 3.19E-09 |
| ENSG00000100078 | PLA2G3     | 6.49E+00 | 4.86E-10 | 3.23E-09 |
| ENSG00000178928 | TPRX1      | 5.98E+00 | 4.99E-10 | 3.32E-09 |
| ENSG00000167693 | NXN        | 1.25E+00 | 5.05E-10 | 3.35E-09 |
| ENSG00000076944 | STXBP2     | 1.27E+00 | 5.09E-10 | 3.38E-09 |
| ENSG00000178078 | STAP2      | 2.33E+00 | 5.22E-10 | 3.46E-09 |
| ENSG00000167311 | ART5       | 3.45E+00 | 5.33E-10 | 3.53E-09 |
| ENSG00000136859 | ANGPTL2    | 1.73E+00 | 5.44E-10 | 3.60E-09 |

|                 |            |          |          |          |
|-----------------|------------|----------|----------|----------|
| ENSG00000131969 | ABHD12B    | 6.09E+00 | 5.50E-10 | 3.64E-09 |
| ENSG00000116983 | HPCAL4     | 2.93E+00 | 5.79E-10 | 3.82E-09 |
| ENSG00000105339 | DENND3     | 4.05E+00 | 5.87E-10 | 3.87E-09 |
| ENSG00000134824 | FADS2      | 1.09E+00 | 5.99E-10 | 3.95E-09 |
| ENSG00000234949 | AC104667.2 | 6.34E+00 | 6.03E-10 | 3.97E-09 |
| ENSG00000100055 | CYTH4      | 6.47E+00 | 6.06E-10 | 3.99E-09 |
| ENSG00000128159 | TUBGCP6    | 1.83E+00 | 6.14E-10 | 4.04E-09 |
| ENSG00000170577 | SIX2       | 1.46E+00 | 6.25E-10 | 4.10E-09 |
| ENSG00000100796 | PPP4R3A    | 1.02E+00 | 6.64E-10 | 4.35E-09 |
| ENSG00000174562 | KLK15      | 6.25E+00 | 6.80E-10 | 4.45E-09 |
| ENSG00000178821 | TMEM52     | 2.60E+00 | 6.86E-10 | 4.49E-09 |
| ENSG00000143553 | SNAPIN     | 1.36E+00 | 6.90E-10 | 4.52E-09 |
| ENSG00000214087 | ARL16      | 1.31E+00 | 7.00E-10 | 4.58E-09 |
| ENSG00000175048 | ZDHHC14    | 1.11E+00 | 7.01E-10 | 4.59E-09 |
| ENSG00000205362 | MT1A       | 6.50E+00 | 7.07E-10 | 4.62E-09 |
| ENSG00000266094 | RASSF5     | 2.79E+00 | 7.13E-10 | 4.66E-09 |
| ENSG00000204577 | LILRB3     | 5.31E+00 | 7.26E-10 | 4.74E-09 |
| ENSG00000251230 | MIR3945HG  | 6.67E+00 | 7.26E-10 | 4.74E-09 |
| ENSG00000262246 | CORO7      | 1.81E+00 | 7.32E-10 | 4.77E-09 |
| ENSG00000160588 | MPZL3      | 2.32E+00 | 7.50E-10 | 4.89E-09 |
| ENSG00000171603 | CLSTN1     | 1.13E+00 | 7.66E-10 | 4.99E-09 |
| ENSG00000172828 | CES3       | 6.32E+00 | 7.71E-10 | 5.01E-09 |
| ENSG00000185561 | TLCD2      | 1.70E+00 | 7.73E-10 | 5.02E-09 |
| ENSG00000163295 | ALPI       | 6.28E+00 | 8.03E-10 | 5.22E-09 |
| ENSG00000178372 | CALML5     | 6.82E+00 | 8.24E-10 | 5.35E-09 |
| ENSG00000168071 | CCDC88B    | 4.15E+00 | 8.38E-10 | 5.43E-09 |
| ENSG00000104880 | ARHGEF18   | 1.28E+00 | 8.44E-10 | 5.47E-09 |
| ENSG00000139990 | DCAF5      | 1.16E+00 | 8.89E-10 | 5.76E-09 |
| ENSG00000090013 | BLVRB      | 1.47E+00 | 8.97E-10 | 5.81E-09 |
| ENSG00000183734 | ASCL2      | 5.63E+00 | 8.99E-10 | 5.82E-09 |
| ENSG00000102349 | KLF8       | 6.31E+00 | 9.03E-10 | 5.84E-09 |
| ENSG00000198752 | CDC42BPB   | 1.02E+00 | 9.04E-10 | 5.84E-09 |
| ENSG00000007384 | RHBDF1     | 1.82E+00 | 9.08E-10 | 5.87E-09 |
| ENSG00000197852 | INKA2      | 1.80E+00 | 9.17E-10 | 5.92E-09 |
| ENSG00000051128 | HOMER3     | 1.25E+00 | 9.32E-10 | 6.02E-09 |
| ENSG00000010030 | ETV7       | 2.90E+00 | 9.45E-10 | 6.10E-09 |
| ENSG00000167880 | EVPL       | 5.46E+00 | 9.55E-10 | 6.16E-09 |
| ENSG00000154639 | CXADR      | 2.23E+00 | 9.75E-10 | 6.28E-09 |
| ENSG00000100815 | TRIP11     | 1.02E+00 | 9.77E-10 | 6.30E-09 |
| ENSG00000104381 | GDAP1      | 1.32E+00 | 9.78E-10 | 6.30E-09 |
| ENSG00000121905 | HPCA       | 4.59E+00 | 1.02E-09 | 6.56E-09 |
| ENSG00000090581 | GNPTG      | 1.03E+00 | 1.04E-09 | 6.66E-09 |
| ENSG00000100987 | VSX1       | 6.54E+00 | 1.05E-09 | 6.76E-09 |
| ENSG00000167968 | DNASE1L2   | 2.50E+00 | 1.08E-09 | 6.96E-09 |
| ENSG00000250067 | YJEFN3     | 1.90E+00 | 1.09E-09 | 7.00E-09 |



|                 |            |          |          |          |
|-----------------|------------|----------|----------|----------|
| ENSG00000116191 | RALGPS2    | 1.25E+00 | 1.09E-09 | 7.00E-09 |
| ENSG00000121454 | LHX4       | 6.18E+00 | 1.12E-09 | 7.20E-09 |
| ENSG00000178573 | MAF        | 2.54E+00 | 1.12E-09 | 7.22E-09 |
| ENSG00000092931 | MFSD11     | 1.01E+00 | 1.13E-09 | 7.22E-09 |
| ENSG00000104081 | BMF        | 2.32E+00 | 1.13E-09 | 7.26E-09 |
| ENSG00000170684 | ZNF296     | 2.46E+00 | 1.16E-09 | 7.43E-09 |
| ENSG00000160746 | ANO10      | 1.08E+00 | 1.18E-09 | 7.53E-09 |
| ENSG00000186594 | MIR22HG    | 1.02E+00 | 1.21E-09 | 7.72E-09 |
| ENSG00000157625 | TAB3       | 1.31E+00 | 1.26E-09 | 8.02E-09 |
| ENSG00000272768 | AC004854.2 | 1.65E+00 | 1.29E-09 | 8.26E-09 |
| ENSG00000203499 | IQANK1     | 5.10E+00 | 1.31E-09 | 8.38E-09 |
| ENSG00000214021 | TTL3       | 2.32E+00 | 1.32E-09 | 8.40E-09 |
| ENSG00000171045 | TSNARE1    | 3.05E+00 | 1.34E-09 | 8.53E-09 |
| ENSG00000189221 | MAOA       | 2.56E+00 | 1.35E-09 | 8.57E-09 |
| ENSG00000185022 | MAFF       | 1.14E+00 | 1.36E-09 | 8.64E-09 |
| ENSG00000164051 | CCDC51     | 1.16E+00 | 1.36E-09 | 8.68E-09 |
| ENSG00000114378 | HYAL1      | 5.90E+00 | 1.41E-09 | 8.94E-09 |
| ENSG00000169184 | MN1        | 2.47E+00 | 1.41E-09 | 8.99E-09 |
| ENSG00000160460 | SPTBN4     | 4.68E+00 | 1.42E-09 | 9.03E-09 |
| ENSG00000054611 | TBC1D22A   | 1.20E+00 | 1.43E-09 | 9.05E-09 |
| ENSG00000158201 | ABHD3      | 1.06E+00 | 1.47E-09 | 9.33E-09 |
| ENSG00000128917 | DLL4       | 2.87E+00 | 1.48E-09 | 9.35E-09 |
| ENSG00000175920 | DOK7       | 6.00E+00 | 1.49E-09 | 9.42E-09 |
| ENSG00000086548 | CEACAM6    | 6.34E+00 | 1.50E-09 | 9.46E-09 |
| ENSG00000176842 | IRX5       | 2.27E+00 | 1.50E-09 | 9.48E-09 |
| ENSG00000102302 | FGD1       | 1.45E+00 | 1.50E-09 | 9.50E-09 |
| ENSG00000110046 | ATG2A      | 1.46E+00 | 1.51E-09 | 9.52E-09 |
| ENSG00000085871 | MGST2      | 2.00E+00 | 1.53E-09 | 9.65E-09 |
| ENSG00000109610 | SOD3       | 6.05E+00 | 1.58E-09 | 9.96E-09 |
| ENSG00000171056 | SOX7       | 2.40E+00 | 1.59E-09 | 1.00E-08 |
| ENSG00000166106 | ADAMTS15   | 2.50E+00 | 1.60E-09 | 1.01E-08 |
| ENSG00000250337 | PURPL      | 3.14E+00 | 1.62E-09 | 1.02E-08 |
| ENSG00000131650 | KREMEN2    | 1.15E+00 | 1.69E-09 | 1.06E-08 |
| ENSG00000100276 | RASL10A    | 3.55E+00 | 1.71E-09 | 1.07E-08 |
| ENSG00000256481 | AP006333.2 | 6.12E+00 | 1.71E-09 | 1.07E-08 |
| ENSG00000234965 | SHISA8     | 2.04E+00 | 1.73E-09 | 1.09E-08 |
| ENSG00000255501 | CARD18     | 6.09E+00 | 1.78E-09 | 1.12E-08 |
| ENSG00000171606 | ZNF274     | 1.10E+00 | 1.88E-09 | 1.18E-08 |
| ENSG00000130287 | NCAN       | 6.24E+00 | 1.88E-09 | 1.18E-08 |
| ENSG00000110203 | FOLR3      | 6.36E+00 | 1.92E-09 | 1.20E-08 |
| ENSG00000272293 | AC083964.1 | 3.54E+00 | 1.98E-09 | 1.23E-08 |
| ENSG00000068650 | ATP11A     | 1.26E+00 | 2.04E-09 | 1.27E-08 |
| ENSG00000175197 | DDIT3      | 1.19E+00 | 2.16E-09 | 1.35E-08 |
| ENSG00000108239 | TBC1D12    | 1.28E+00 | 2.28E-09 | 1.41E-08 |
| ENSG00000197019 | SERTAD1    | 1.32E+00 | 2.28E-09 | 1.42E-08 |

|                 |             |          |          |          |
|-----------------|-------------|----------|----------|----------|
| ENSG00000101445 | PPP1R16B    | 4.69E+00 | 2.51E-09 | 1.55E-08 |
| ENSG00000126878 | AIF1L       | 1.26E+00 | 2.57E-09 | 1.59E-08 |
| ENSG00000183979 | NPB         | 4.98E+00 | 2.67E-09 | 1.65E-08 |
| ENSG00000181885 | CLDN7       | 5.91E+00 | 2.70E-09 | 1.67E-08 |
| ENSG00000104361 | NIPAL2      | 2.47E+00 | 2.72E-09 | 1.68E-08 |
| ENSG00000172663 | TMEM134     | 1.69E+00 | 2.75E-09 | 1.70E-08 |
| ENSG00000137266 | SLC22A23    | 2.09E+00 | 2.76E-09 | 1.70E-08 |
| ENSG00000165804 | ZNF219      | 1.34E+00 | 3.00E-09 | 1.85E-08 |
| ENSG00000196517 | SLC6A9      | 2.10E+00 | 3.00E-09 | 1.85E-08 |
| ENSG00000130779 | CLIP1       | 1.03E+00 | 3.05E-09 | 1.88E-08 |
| ENSG00000261609 | GAN         | 1.55E+00 | 3.08E-09 | 1.89E-08 |
| ENSG00000161091 | MFSD12      | 1.10E+00 | 3.14E-09 | 1.93E-08 |
| ENSG00000198125 | MB          | 4.10E+00 | 3.19E-09 | 1.96E-08 |
| ENSG00000181378 | CFAP65      | 5.97E+00 | 3.22E-09 | 1.98E-08 |
| ENSG00000187244 | BCAM        | 1.44E+00 | 3.28E-09 | 2.01E-08 |
| ENSG00000101098 | RIMS4       | 6.05E+00 | 3.28E-09 | 2.01E-08 |
| ENSG00000183092 | BEGAIN      | 3.32E+00 | 3.33E-09 | 2.04E-08 |
| ENSG00000184343 | SRPK3       | 6.43E+00 | 3.35E-09 | 2.05E-08 |
| ENSG00000102683 | SGCG        | 6.38E+00 | 3.38E-09 | 2.07E-08 |
| ENSG00000099377 | HSD3B7      | 2.41E+00 | 3.42E-09 | 2.09E-08 |
| ENSG00000185522 | LMNTD2      | 4.58E+00 | 3.46E-09 | 2.12E-08 |
| ENSG00000158815 | FGF17       | 5.86E+00 | 3.48E-09 | 2.13E-08 |
| ENSG00000196378 | ZNF34       | 3.14E+00 | 3.63E-09 | 2.21E-08 |
| ENSG00000184730 | APOBR       | 6.24E+00 | 3.75E-09 | 2.28E-08 |
| ENSG00000138111 | MFSD13A     | 2.91E+00 | 3.79E-09 | 2.31E-08 |
| ENSG00000225978 | HAR1A       | 4.86E+00 | 3.82E-09 | 2.33E-08 |
| ENSG00000197191 | CYSRT1      | 3.01E+00 | 3.87E-09 | 2.35E-08 |
| ENSG00000068831 | RASGRP2     | 5.26E+00 | 3.99E-09 | 2.42E-08 |
| ENSG00000145920 | CPLX2       | 6.24E+00 | 4.01E-09 | 2.43E-08 |
| ENSG00000102879 | CORO1A      | 1.85E+00 | 4.03E-09 | 2.45E-08 |
| ENSG00000125531 | FNDC11      | 5.81E+00 | 4.10E-09 | 2.48E-08 |
| ENSG00000105472 | CLEC11A     | 2.05E+00 | 4.17E-09 | 2.52E-08 |
| ENSG00000175294 | CATSPER1    | 4.15E+00 | 4.20E-09 | 2.54E-08 |
| ENSG00000162298 | SYVN1       | 1.05E+00 | 4.23E-09 | 2.56E-08 |
| ENSG00000158955 | WNT9B       | 5.78E+00 | 4.24E-09 | 2.56E-08 |
| ENSG00000147509 | RGS20       | 1.54E+00 | 4.31E-09 | 2.60E-08 |
| ENSG00000160326 | SLC2A6      | 1.07E+00 | 4.31E-09 | 2.60E-08 |
| ENSG00000182165 | TP53TG1     | 1.82E+00 | 4.42E-09 | 2.67E-08 |
| ENSG00000196689 | TRPV1       | 3.25E+00 | 4.45E-09 | 2.68E-08 |
| ENSG00000175591 | P2RY2       | 6.07E+00 | 4.51E-09 | 2.72E-08 |
| ENSG00000197180 | AC244090.1  | 2.52E+00 | 4.56E-09 | 2.74E-08 |
| ENSG00000215769 | ARHGAP27P1- | 5.57E+00 | 4.79E-09 | 2.88E-08 |
| ENSG00000280693 | SH3PXD2A-AS | 6.38E+00 | 4.79E-09 | 2.88E-08 |
| ENSG00000215156 | AC138409.1  | 6.17E+00 | 4.80E-09 | 2.88E-08 |
| ENSG00000128294 | TPST2       | 1.16E+00 | 4.83E-09 | 2.90E-08 |

|                 |            |          |          |          |
|-----------------|------------|----------|----------|----------|
| ENSG00000078114 | NEBL       | 4.61E+00 | 4.89E-09 | 2.93E-08 |
| ENSG00000110497 | AMBRA1     | 1.12E+00 | 4.93E-09 | 2.96E-08 |
| ENSG00000260428 | SCX        | 2.99E+00 | 5.09E-09 | 3.05E-08 |
| ENSG00000139323 | POC1B      | 1.61E+00 | 5.11E-09 | 3.06E-08 |
| ENSG00000099814 | CEP170B    | 1.53E+00 | 5.16E-09 | 3.09E-08 |
| ENSG00000147799 | ARHGAP39   | 1.50E+00 | 5.16E-09 | 3.09E-08 |
| ENSG00000198133 | TMEM229B   | 3.20E+00 | 5.20E-09 | 3.11E-08 |
| ENSG00000162643 | WDR63      | 3.61E+00 | 5.21E-09 | 3.11E-08 |
| ENSG00000137265 | IRF4       | 5.73E+00 | 5.27E-09 | 3.15E-08 |
| ENSG00000171365 | CLCN5      | 1.75E+00 | 5.28E-09 | 3.15E-08 |
| ENSG00000124126 | PREX1      | 1.57E+00 | 5.30E-09 | 3.16E-08 |
| ENSG00000183337 | BCOR       | 1.31E+00 | 5.30E-09 | 3.16E-08 |
| ENSG00000141579 | ZNF750     | 6.26E+00 | 5.35E-09 | 3.19E-08 |
| ENSG00000157766 | ACAN       | 3.24E+00 | 5.37E-09 | 3.20E-08 |
| ENSG00000172936 | MYD88      | 1.16E+00 | 5.38E-09 | 3.21E-08 |
| ENSG00000044012 | GUCA2B     | 6.22E+00 | 5.64E-09 | 3.36E-08 |
| ENSG00000261359 | PYCARD-AS1 | 3.66E+00 | 5.71E-09 | 3.40E-08 |
| ENSG00000154025 | SLC5A10    | 5.83E+00 | 5.91E-09 | 3.51E-08 |
| ENSG00000263343 | AC009088.4 | 1.50E+00 | 5.95E-09 | 3.53E-08 |
| ENSG00000179163 | FUCA1      | 1.07E+00 | 6.24E-09 | 3.70E-08 |
| ENSG00000223573 | TINCR      | 2.85E+00 | 6.24E-09 | 3.70E-08 |
| ENSG00000260196 | AC124798.1 | 2.65E+00 | 6.26E-09 | 3.70E-08 |
| ENSG00000254986 | DPP3       | 1.05E+00 | 6.40E-09 | 3.79E-08 |
| ENSG00000275880 | AL139385.1 | 3.91E+00 | 6.43E-09 | 3.81E-08 |
| ENSG00000204323 | SMIM5      | 4.99E+00 | 6.61E-09 | 3.91E-08 |
| ENSG00000198142 | SOWAHC     | 1.04E+00 | 6.85E-09 | 4.05E-08 |
| ENSG00000221866 | PLXNA4     | 6.23E+00 | 6.85E-09 | 4.05E-08 |
| ENSG00000075388 | FGF4       | 5.93E+00 | 7.19E-09 | 4.24E-08 |
| ENSG00000197415 | VEPH1      | 4.78E+00 | 7.19E-09 | 4.24E-08 |
| ENSG00000162032 | SPSB3      | 1.30E+00 | 7.28E-09 | 4.29E-08 |
| ENSG00000213930 | GALT       | 2.04E+00 | 7.28E-09 | 4.29E-08 |
| ENSG00000102760 | RGCC       | 4.37E+00 | 7.92E-09 | 4.65E-08 |
| ENSG00000022567 | SLC45A4    | 1.46E+00 | 7.93E-09 | 4.66E-08 |
| ENSG00000164850 | GPER1      | 5.97E+00 | 7.98E-09 | 4.68E-08 |
| ENSG00000068724 | TTC7A      | 1.54E+00 | 8.01E-09 | 4.70E-08 |
| ENSG00000111057 | KRT18      | 1.15E+00 | 8.03E-09 | 4.71E-08 |
| ENSG00000101745 | ANKRD12    | 1.02E+00 | 8.05E-09 | 4.72E-08 |
| ENSG00000184916 | JAG2       | 2.63E+00 | 8.27E-09 | 4.85E-08 |
| ENSG00000101695 | RNF125     | 3.50E+00 | 8.31E-09 | 4.87E-08 |
| ENSG00000163485 | ADORA1     | 3.40E+00 | 8.39E-09 | 4.92E-08 |
| ENSG00000229723 | LINC01054  | 5.67E+00 | 8.40E-09 | 4.92E-08 |
| ENSG00000144591 | GMPPA      | 1.17E+00 | 8.54E-09 | 5.00E-08 |
| ENSG00000181035 | SLC25A42   | 2.04E+00 | 8.56E-09 | 5.00E-08 |
| ENSG00000176912 | TYMSOS     | 1.97E+00 | 8.68E-09 | 5.07E-08 |
| ENSG00000275437 | AL121832.3 | 3.32E+00 | 8.71E-09 | 5.08E-08 |

|                 |           |          |          |          |
|-----------------|-----------|----------|----------|----------|
| ENSG00000221963 | APOL6     | 1.12E+00 | 8.75E-09 | 5.11E-08 |
| ENSG00000152939 | MARVELD2  | 1.29E+00 | 8.88E-09 | 5.18E-08 |
| ENSG00000072310 | SREBF1    | 1.06E+00 | 8.94E-09 | 5.21E-08 |
| ENSG00000106948 | AKNA      | 2.15E+00 | 9.00E-09 | 5.25E-08 |
| ENSG00000164124 | TMEM144   | 2.87E+00 | 9.03E-09 | 5.26E-08 |
| ENSG00000107521 | HPS1      | 1.21E+00 | 9.12E-09 | 5.31E-08 |
| ENSG00000105875 | WDR91     | 1.81E+00 | 9.43E-09 | 5.49E-08 |
| ENSG00000124299 | PEPD      | 1.21E+00 | 9.65E-09 | 5.60E-08 |
| ENSG00000167614 | TTYH1     | 6.31E+00 | 1.05E-08 | 6.07E-08 |
| ENSG00000197329 | PELI1     | 1.99E+00 | 1.06E-08 | 6.13E-08 |
| ENSG00000172661 | WASHC2C   | 1.31E+00 | 1.06E-08 | 6.13E-08 |
| ENSG00000087303 | NID2      | 1.19E+00 | 1.07E-08 | 6.20E-08 |
| ENSG00000089902 | RCOR1     | 1.18E+00 | 1.08E-08 | 6.23E-08 |
| ENSG00000180263 | FGD6      | 1.21E+00 | 1.12E-08 | 6.46E-08 |
| ENSG00000167780 | SOAT2     | 5.70E+00 | 1.12E-08 | 6.50E-08 |
| ENSG00000188833 | ENTPD8    | 5.36E+00 | 1.14E-08 | 6.61E-08 |
| ENSG00000187867 | PALM3     | 2.84E+00 | 1.14E-08 | 6.61E-08 |
| ENSG00000095397 | WHRN      | 1.70E+00 | 1.20E-08 | 6.94E-08 |
| ENSG00000141664 | ZCCHC2    | 1.75E+00 | 1.25E-08 | 7.20E-08 |
| ENSG00000178695 | KCTD12    | 1.06E+00 | 1.25E-08 | 7.21E-08 |
| ENSG00000100284 | TOM1      | 1.14E+00 | 1.29E-08 | 7.44E-08 |
| ENSG00000107872 | FBXL15    | 1.16E+00 | 1.30E-08 | 7.46E-08 |
| ENSG00000177595 | PIDD1     | 1.34E+00 | 1.31E-08 | 7.53E-08 |
| ENSG00000197084 | LCE1C     | 4.60E+00 | 1.34E-08 | 7.70E-08 |
| ENSG00000120690 | ELF1      | 1.05E+00 | 1.34E-08 | 7.70E-08 |
| ENSG00000160439 | RDH13     | 1.50E+00 | 1.35E-08 | 7.76E-08 |
| ENSG00000274602 | PI4KAP1   | 1.71E+00 | 1.37E-08 | 7.87E-08 |
| ENSG00000237523 | LINC00857 | 2.73E+00 | 1.39E-08 | 7.96E-08 |
| ENSG00000263934 | SNORD3A   | 3.52E+00 | 1.40E-08 | 8.00E-08 |
| ENSG00000157353 | FCSK      | 2.12E+00 | 1.40E-08 | 8.00E-08 |
| ENSG00000147383 | NSDHL     | 1.06E+00 | 1.46E-08 | 8.32E-08 |
| ENSG00000088808 | PPP1R13B  | 1.57E+00 | 1.49E-08 | 8.48E-08 |
| ENSG00000155629 | PIK3AP1   | 3.52E+00 | 1.53E-08 | 8.68E-08 |
| ENSG00000131797 | CLUHP3    | 2.90E+00 | 1.54E-08 | 8.77E-08 |
| ENSG00000106927 | AMBP      | 4.28E+00 | 1.57E-08 | 8.94E-08 |
| ENSG00000204604 | ZNF468    | 1.49E+00 | 1.65E-08 | 9.33E-08 |
| ENSG00000164715 | LMTK2     | 1.33E+00 | 1.66E-08 | 9.39E-08 |
| ENSG00000181404 | WASHC1    | 1.53E+00 | 1.67E-08 | 9.44E-08 |
| ENSG00000125998 | FAM83C    | 5.79E+00 | 1.74E-08 | 9.83E-08 |
| ENSG00000174007 | CEP19     | 1.55E+00 | 1.74E-08 | 9.86E-08 |
| ENSG00000015520 | NPC1L1    | 5.86E+00 | 1.76E-08 | 9.94E-08 |
| ENSG00000154889 | MPPE1     | 1.74E+00 | 1.77E-08 | 9.98E-08 |
| ENSG00000215853 | RPTN      | 6.11E+00 | 1.83E-08 | 1.03E-07 |
| ENSG00000127824 | TUBA4A    | 1.70E+00 | 1.85E-08 | 1.04E-07 |
| ENSG00000177570 | SAMD12    | 4.59E+00 | 1.86E-08 | 1.05E-07 |

|                 |            |          |          |          |
|-----------------|------------|----------|----------|----------|
| ENSG00000130734 | ATG4D      | 1.06E+00 | 1.87E-08 | 1.05E-07 |
| ENSG00000172113 | NME6       | 1.10E+00 | 1.88E-08 | 1.06E-07 |
| ENSG00000118369 | USP35      | 2.40E+00 | 1.93E-08 | 1.09E-07 |
| ENSG00000182272 | B4GALNT4   | 1.11E+00 | 1.96E-08 | 1.10E-07 |
| ENSG00000143515 | ATP8B2     | 1.39E+00 | 1.99E-08 | 1.12E-07 |
| ENSG00000167562 | ZNF701     | 1.48E+00 | 2.00E-08 | 1.12E-07 |
| ENSG00000112297 | CRYBG1     | 1.25E+00 | 2.00E-08 | 1.13E-07 |
| ENSG00000090989 | EXOC1      | 1.15E+00 | 2.04E-08 | 1.15E-07 |
| ENSG00000163071 | SPATA18    | 4.91E+00 | 2.06E-08 | 1.15E-07 |
| ENSG00000155465 | SLC7A7     | 2.66E+00 | 2.08E-08 | 1.17E-07 |
| ENSG00000144550 | CPNE9      | 4.76E+00 | 2.12E-08 | 1.19E-07 |
| ENSG00000144488 | ESPNL      | 6.16E+00 | 2.13E-08 | 1.19E-07 |
| ENSG00000101198 | NKAIN4     | 2.89E+00 | 2.14E-08 | 1.20E-07 |
| ENSG00000168067 | MAP4K2     | 1.28E+00 | 2.15E-08 | 1.20E-07 |
| ENSG00000170075 | GPR37L1    | 4.57E+00 | 2.16E-08 | 1.21E-07 |
| ENSG00000151651 | ADAM8      | 3.65E+00 | 2.16E-08 | 1.21E-07 |
| ENSG00000204618 | RNF39      | 6.08E+00 | 2.18E-08 | 1.22E-07 |
| ENSG00000099338 | CATSPERG   | 6.32E+00 | 2.20E-08 | 1.23E-07 |
| ENSG00000167543 | TP53I13    | 1.52E+00 | 2.20E-08 | 1.23E-07 |
| ENSG00000177409 | SAMD9L     | 2.89E+00 | 2.21E-08 | 1.23E-07 |
| ENSG00000126583 | PRKCG      | 4.70E+00 | 2.23E-08 | 1.24E-07 |
| ENSG00000164070 | HSPA4L     | 1.13E+00 | 2.24E-08 | 1.25E-07 |
| ENSG00000120055 | C10orf95   | 5.08E+00 | 2.24E-08 | 1.25E-07 |
| ENSG00000174939 | ASPHD1     | 1.43E+00 | 2.29E-08 | 1.28E-07 |
| ENSG00000135452 | TSPAN31    | 2.12E+00 | 2.30E-08 | 1.28E-07 |
| ENSG00000166562 | SEC11C     | 1.19E+00 | 2.30E-08 | 1.28E-07 |
| ENSG00000287356 | AL590822.3 | 3.04E+00 | 2.33E-08 | 1.30E-07 |
| ENSG00000105146 | AURKC      | 2.94E+00 | 2.34E-08 | 1.30E-07 |
| ENSG00000064270 | ATP2C2     | 5.47E+00 | 2.37E-08 | 1.31E-07 |
| ENSG00000138166 | DUSP5      | 1.06E+00 | 2.40E-08 | 1.33E-07 |
| ENSG00000189350 | TOGARAM2   | 4.76E+00 | 2.40E-08 | 1.33E-07 |
| ENSG00000204084 | INPP5B     | 1.74E+00 | 2.44E-08 | 1.36E-07 |
| ENSG00000158296 | SLC13A3    | 5.53E+00 | 2.45E-08 | 1.36E-07 |
| ENSG00000182261 | NLRP10     | 5.72E+00 | 2.46E-08 | 1.36E-07 |
| ENSG00000162738 | VANGL2     | 1.45E+00 | 2.46E-08 | 1.36E-07 |
| ENSG00000151240 | DIP2C      | 1.30E+00 | 2.51E-08 | 1.39E-07 |
| ENSG00000164047 | CAMP       | 5.96E+00 | 2.54E-08 | 1.40E-07 |
| ENSG00000121753 | ADGRB2     | 1.45E+00 | 2.55E-08 | 1.41E-07 |
| ENSG00000229967 | MAGEA4-AS1 | 6.03E+00 | 2.57E-08 | 1.42E-07 |
| ENSG00000130598 | TNNI2      | 5.70E+00 | 2.60E-08 | 1.44E-07 |
| ENSG00000005206 | SPPL2B     | 1.12E+00 | 2.61E-08 | 1.44E-07 |
| ENSG00000168754 | FAM178B    | 5.69E+00 | 2.62E-08 | 1.45E-07 |
| ENSG00000170537 | TMC7       | 3.60E+00 | 2.63E-08 | 1.45E-07 |
| ENSG00000205352 | PRR13      | 1.18E+00 | 2.70E-08 | 1.49E-07 |
| ENSG00000058085 | LAMC2      | 3.01E+00 | 2.73E-08 | 1.51E-07 |

|                 |            |          |          |          |
|-----------------|------------|----------|----------|----------|
| ENSG00000118137 | APOA1      | 4.29E+00 | 2.77E-08 | 1.52E-07 |
| ENSG00000101336 | HCK        | 4.30E+00 | 2.82E-08 | 1.55E-07 |
| ENSG00000163623 | NKX6-1     | 5.27E+00 | 2.84E-08 | 1.56E-07 |
| ENSG00000184863 | RBM33      | 1.03E+00 | 2.85E-08 | 1.57E-07 |
| ENSG00000198729 | PPP1R14C   | 2.03E+00 | 2.88E-08 | 1.58E-07 |
| ENSG00000197847 | SLC22A20P  | 6.16E+00 | 2.96E-08 | 1.62E-07 |
| ENSG00000049283 | EPN3       | 5.70E+00 | 3.10E-08 | 1.69E-07 |
| ENSG00000228526 | MIR34AHG   | 2.04E+00 | 3.10E-08 | 1.69E-07 |
| ENSG00000261713 | SSTR5-AS1  | 5.86E+00 | 3.11E-08 | 1.70E-07 |
| ENSG00000136044 | APPL2      | 1.08E+00 | 3.18E-08 | 1.74E-07 |
| ENSG00000149451 | ADAM33     | 5.08E+00 | 3.20E-08 | 1.75E-07 |
| ENSG00000011422 | PLAUR      | 1.40E+00 | 3.24E-08 | 1.76E-07 |
| ENSG00000105755 | ETHE1      | 1.63E+00 | 3.24E-08 | 1.76E-07 |
| ENSG00000112039 | FANCE      | 1.59E+00 | 3.26E-08 | 1.78E-07 |
| ENSG00000184985 | SORCS2     | 2.79E+00 | 3.30E-08 | 1.79E-07 |
| ENSG00000186222 | BLOC1S4    | 1.07E+00 | 3.38E-08 | 1.84E-07 |
| ENSG00000111087 | GLI1       | 4.90E+00 | 3.39E-08 | 1.84E-07 |
| ENSG00000184500 | PROS1      | 1.30E+00 | 3.41E-08 | 1.85E-07 |
| ENSG00000115145 | STAM2      | 1.00E+00 | 3.44E-08 | 1.87E-07 |
| ENSG00000283294 | AP005212.4 | 2.64E+00 | 3.45E-08 | 1.87E-07 |
| ENSG00000186994 | KANK3      | 2.70E+00 | 3.51E-08 | 1.91E-07 |
| ENSG00000128268 | MGAT3      | 1.73E+00 | 3.62E-08 | 1.96E-07 |
| ENSG00000164778 | EN2        | 5.92E+00 | 3.75E-08 | 2.03E-07 |
| ENSG00000235098 | ANKRD65    | 5.89E+00 | 3.78E-08 | 2.04E-07 |
| ENSG00000103154 | NECAB2     | 3.98E+00 | 3.91E-08 | 2.11E-07 |
| ENSG00000007402 | CACNA2D2   | 2.59E+00 | 3.98E-08 | 2.15E-07 |
| ENSG00000143674 | MAP3K21    | 1.94E+00 | 4.02E-08 | 2.16E-07 |
| ENSG00000082397 | EPB41L3    | 2.64E+00 | 4.23E-08 | 2.28E-07 |
| ENSG00000179152 | TCAIM      | 1.07E+00 | 4.34E-08 | 2.33E-07 |
| ENSG00000051009 | FAM160A2   | 1.42E+00 | 4.38E-08 | 2.35E-07 |
| ENSG00000196152 | ZNF79      | 1.99E+00 | 4.47E-08 | 2.40E-07 |
| ENSG00000137393 | RNF144B    | 3.12E+00 | 4.55E-08 | 2.45E-07 |
| ENSG00000259439 | LINC01833  | 5.74E+00 | 4.67E-08 | 2.51E-07 |
| ENSG00000164976 | MYORG      | 1.61E+00 | 4.77E-08 | 2.56E-07 |
| ENSG00000105467 | SYNGR4     | 6.14E+00 | 4.87E-08 | 2.61E-07 |
| ENSG00000120875 | DUSP4      | 1.22E+00 | 4.88E-08 | 2.62E-07 |
| ENSG00000173237 | C11orf86   | 3.24E+00 | 4.92E-08 | 2.63E-07 |
| ENSG00000164690 | SHH        | 4.00E+00 | 4.93E-08 | 2.64E-07 |
| ENSG00000106012 | IQCE       | 1.32E+00 | 4.95E-08 | 2.65E-07 |
| ENSG00000186174 | BCL9L      | 1.07E+00 | 5.00E-08 | 2.68E-07 |
| ENSG00000167323 | STIM1      | 1.05E+00 | 5.05E-08 | 2.70E-07 |
| ENSG00000196296 | ATP2A1     | 3.27E+00 | 5.06E-08 | 2.71E-07 |
| ENSG00000197070 | ARRDC1     | 1.80E+00 | 5.15E-08 | 2.75E-07 |
| ENSG00000138964 | PARVG      | 6.48E+00 | 5.21E-08 | 2.78E-07 |
| ENSG00000102755 | FLT1       | 1.11E+00 | 5.44E-08 | 2.90E-07 |

|                 |            |          |          |          |
|-----------------|------------|----------|----------|----------|
| ENSG00000183647 | ZNF530     | 1.63E+00 | 5.44E-08 | 2.90E-07 |
| ENSG00000082458 | DLG3       | 1.29E+00 | 5.48E-08 | 2.92E-07 |
| ENSG00000120949 | TNFRSF8    | 5.82E+00 | 5.48E-08 | 2.92E-07 |
| ENSG00000112514 | CUTA       | 1.36E+00 | 5.58E-08 | 2.97E-07 |
| ENSG00000115112 | TFCP2L1    | 5.59E+00 | 5.64E-08 | 3.00E-07 |
| ENSG00000196781 | TLE1       | 1.35E+00 | 5.80E-08 | 3.08E-07 |
| ENSG00000182575 | NXPH3      | 5.86E+00 | 5.86E-08 | 3.11E-07 |
| ENSG00000198198 | SZT2       | 1.47E+00 | 5.90E-08 | 3.13E-07 |
| ENSG00000249673 | NOP14-AS1  | 1.74E+00 | 5.90E-08 | 3.13E-07 |
| ENSG00000103316 | CRYM       | 4.86E+00 | 6.06E-08 | 3.21E-07 |
| ENSG00000161509 | GRIN2C     | 5.30E+00 | 6.29E-08 | 3.33E-07 |
| ENSG00000172927 | MYEOV      | 3.47E+00 | 6.33E-08 | 3.35E-07 |
| ENSG00000136715 | SAP130     | 1.04E+00 | 6.38E-08 | 3.37E-07 |
| ENSG00000143554 | SLC27A3    | 2.39E+00 | 6.38E-08 | 3.37E-07 |
| ENSG00000087085 | ACHE       | 3.81E+00 | 6.41E-08 | 3.39E-07 |
| ENSG00000078814 | MYH7B      | 6.47E+00 | 6.44E-08 | 3.40E-07 |
| ENSG00000148798 | INA        | 1.81E+00 | 6.50E-08 | 3.43E-07 |
| ENSG00000145687 | SSBP2      | 3.35E+00 | 6.54E-08 | 3.45E-07 |
| ENSG00000111424 | VDR        | 1.06E+00 | 6.58E-08 | 3.47E-07 |
| ENSG00000180209 | MYLPF      | 3.40E+00 | 6.64E-08 | 3.51E-07 |
| ENSG00000122378 | PRXL2A     | 1.71E+00 | 6.75E-08 | 3.56E-07 |
| ENSG00000158445 | KCNB1      | 3.74E+00 | 6.77E-08 | 3.57E-07 |
| ENSG00000198570 | RD3        | 5.65E+00 | 6.83E-08 | 3.60E-07 |
| ENSG00000280027 | AC007342.9 | 5.75E+00 | 6.86E-08 | 3.61E-07 |
| ENSG00000095951 | HIVEP1     | 1.26E+00 | 6.95E-08 | 3.66E-07 |
| ENSG00000287600 | AC122719.3 | 5.82E+00 | 7.08E-08 | 3.72E-07 |
| ENSG00000196436 | NPIP15     | 5.33E+00 | 7.23E-08 | 3.80E-07 |
| ENSG00000159753 | CARMIL2    | 2.39E+00 | 7.36E-08 | 3.86E-07 |
| ENSG00000247317 | LY6E-DT    | 5.37E+00 | 7.36E-08 | 3.87E-07 |
| ENSG00000169885 | CALML6     | 5.82E+00 | 7.54E-08 | 3.95E-07 |
| ENSG00000278558 | TMEM191B   | 5.18E+00 | 7.57E-08 | 3.97E-07 |
| ENSG00000197506 | SLC28A3    | 5.45E+00 | 7.67E-08 | 4.02E-07 |
| ENSG00000157379 | DHRS1      | 2.96E+00 | 7.85E-08 | 4.11E-07 |
| ENSG00000151116 | UEVLD      | 1.40E+00 | 7.96E-08 | 4.16E-07 |
| ENSG00000256955 | AC131009.2 | 5.02E+00 | 7.98E-08 | 4.17E-07 |
| ENSG00000213676 | ATF6B      | 2.12E+00 | 8.06E-08 | 4.21E-07 |
| ENSG00000141699 | RETREG3    | 1.32E+00 | 8.14E-08 | 4.25E-07 |
| ENSG00000141977 | CIB3       | 6.31E+00 | 8.24E-08 | 4.30E-07 |
| ENSG00000167333 | TRIM68     | 1.48E+00 | 8.81E-08 | 4.58E-07 |
| ENSG00000223572 | CKMT1A     | 3.84E+00 | 8.83E-08 | 4.59E-07 |
| ENSG00000273174 | AC108673.2 | 3.38E+00 | 8.85E-08 | 4.60E-07 |
| ENSG00000197283 | SYNGAP1    | 2.41E+00 | 9.02E-08 | 4.68E-07 |
| ENSG00000146826 | MAP11      | 1.57E+00 | 9.24E-08 | 4.79E-07 |
| ENSG00000165359 | INTS6L     | 4.11E+00 | 9.30E-08 | 4.82E-07 |
| ENSG00000135519 | KCNH3      | 3.09E+00 | 9.58E-08 | 4.95E-07 |

|                 |            |          |          |          |
|-----------------|------------|----------|----------|----------|
| ENSG00000167644 | C19orf33   | 6.29E+00 | 9.57E-08 | 4.95E-07 |
| ENSG00000168118 | RAB4A      | 1.33E+00 | 9.57E-08 | 4.95E-07 |
| ENSG00000187678 | SPRY4      | 1.27E+00 | 9.58E-08 | 4.95E-07 |
| ENSG00000112685 | EXOC2      | 1.25E+00 | 9.61E-08 | 4.97E-07 |
| ENSG00000125652 | ALKBH7     | 1.58E+00 | 9.67E-08 | 5.00E-07 |
| ENSG00000269958 | AL049840.5 | 1.17E+00 | 9.91E-08 | 5.12E-07 |
| ENSG00000102935 | ZNF423     | 2.22E+00 | 9.93E-08 | 5.12E-07 |
| ENSG00000086102 | NFX1       | 1.05E+00 | 9.95E-08 | 5.13E-07 |
| ENSG00000198786 | MT-ND5     | 1.04E+00 | 1.01E-07 | 5.22E-07 |
| ENSG00000142784 | WDTC1      | 1.03E+00 | 1.03E-07 | 5.29E-07 |
| ENSG00000153902 | LGI4       | 5.32E+00 | 1.10E-07 | 5.64E-07 |
| ENSG00000091536 | MYO15A     | 4.57E+00 | 1.12E-07 | 5.76E-07 |
| ENSG00000073350 | LLGL2      | 1.66E+00 | 1.15E-07 | 5.90E-07 |
| ENSG00000143333 | RGS16      | 4.53E+00 | 1.15E-07 | 5.90E-07 |
| ENSG00000171385 | KCND3      | 6.12E+00 | 1.16E-07 | 5.92E-07 |
| ENSG00000090238 | YPEL3      | 1.58E+00 | 1.18E-07 | 6.02E-07 |
| ENSG00000233974 | AC138951.1 | 5.97E+00 | 1.18E-07 | 6.03E-07 |
| ENSG00000170190 | SLC16A5    | 2.26E+00 | 1.19E-07 | 6.08E-07 |
| ENSG00000165097 | KDM1B      | 1.64E+00 | 1.20E-07 | 6.13E-07 |
| ENSG00000205517 | RGL3       | 2.12E+00 | 1.21E-07 | 6.16E-07 |
| ENSG00000120549 | KIAA1217   | 1.75E+00 | 1.21E-07 | 6.17E-07 |
| ENSG00000152056 | AP1S3      | 1.94E+00 | 1.24E-07 | 6.33E-07 |
| ENSG00000196431 | CRYBA4     | 6.00E+00 | 1.24E-07 | 6.33E-07 |
| ENSG00000159713 | TPPP3      | 4.15E+00 | 1.26E-07 | 6.40E-07 |
| ENSG00000185847 | LINC01405  | 5.94E+00 | 1.28E-07 | 6.52E-07 |
| ENSG00000274993 | AC254629.1 | 5.51E+00 | 1.31E-07 | 6.64E-07 |
| ENSG00000214176 | PLEKHM1P1  | 2.33E+00 | 1.31E-07 | 6.67E-07 |
| ENSG00000102802 | MEDAG      | 1.78E+00 | 1.32E-07 | 6.70E-07 |
| ENSG00000185559 | DLK1       | 5.36E+00 | 1.34E-07 | 6.78E-07 |
| ENSG00000287725 | AP003071.5 | 4.81E+00 | 1.35E-07 | 6.87E-07 |
| ENSG00000197417 | SHPK       | 1.13E+00 | 1.39E-07 | 7.04E-07 |
| ENSG00000175147 | TMEM51-AS1 | 4.34E+00 | 1.40E-07 | 7.10E-07 |
| ENSG00000275902 | AC139530.3 | 3.32E+00 | 1.41E-07 | 7.13E-07 |
| ENSG00000066422 | ZBTB11     | 1.09E+00 | 1.41E-07 | 7.14E-07 |
| ENSG00000205592 | MUC19      | 6.05E+00 | 1.46E-07 | 7.36E-07 |
| ENSG00000177685 | CRACR2B    | 3.79E+00 | 1.47E-07 | 7.42E-07 |
| ENSG00000177679 | SRRM3      | 1.95E+00 | 1.48E-07 | 7.48E-07 |
| ENSG00000130299 | GTPBP3     | 1.17E+00 | 1.48E-07 | 7.48E-07 |
| ENSG00000170498 | KISS1      | 7.51E+00 | 1.53E-07 | 7.70E-07 |
| ENSG00000090565 | RAB11FIP3  | 1.05E+00 | 1.53E-07 | 7.73E-07 |
| ENSG00000099860 | GADD45B    | 1.04E+00 | 1.54E-07 | 7.73E-07 |
| ENSG00000141505 | ASGR1      | 1.88E+00 | 1.54E-07 | 7.75E-07 |
| ENSG00000196678 | ERI2       | 1.05E+00 | 1.55E-07 | 7.80E-07 |
| ENSG00000161055 | SCGB3A1    | 5.98E+00 | 1.58E-07 | 7.94E-07 |
| ENSG00000118160 | SLC8A2     | 3.77E+00 | 1.59E-07 | 7.97E-07 |



|                 |            |          |          |          |
|-----------------|------------|----------|----------|----------|
| ENSG00000135925 | WNT10A     | 4.14E+00 | 1.59E-07 | 7.97E-07 |
| ENSG00000117408 | IPO13      | 1.12E+00 | 1.60E-07 | 8.05E-07 |
| ENSG00000163788 | SNRK       | 1.35E+00 | 1.62E-07 | 8.14E-07 |
| ENSG00000067141 | NEO1       | 1.71E+00 | 1.63E-07 | 8.17E-07 |
| ENSG00000148219 | ASTN2      | 2.42E+00 | 1.64E-07 | 8.21E-07 |
| ENSG00000160606 | TLCD1      | 2.16E+00 | 1.65E-07 | 8.25E-07 |
| ENSG00000135272 | MDFIC      | 1.70E+00 | 1.66E-07 | 8.32E-07 |
| ENSG00000160179 | ABCG1      | 3.78E+00 | 1.66E-07 | 8.32E-07 |
| ENSG00000160224 | AIRE       | 5.89E+00 | 1.67E-07 | 8.37E-07 |
| ENSG00000154898 | CCDC144CP  | 1.48E+00 | 1.69E-07 | 8.43E-07 |
| ENSG00000236432 | AC097662.1 | 3.69E+00 | 1.76E-07 | 8.76E-07 |
| ENSG00000143630 | HCN3       | 2.23E+00 | 1.79E-07 | 8.95E-07 |
| ENSG00000204428 | LY6G5C     | 3.03E+00 | 1.81E-07 | 9.02E-07 |
| ENSG00000142675 | CNKSR1     | 4.28E+00 | 1.82E-07 | 9.08E-07 |
| ENSG00000148384 | INPP5E     | 1.08E+00 | 1.84E-07 | 9.17E-07 |
| ENSG00000014164 | ZC3H3      | 1.21E+00 | 1.85E-07 | 9.21E-07 |
| ENSG00000268518 | AC020909.2 | 6.55E+00 | 1.85E-07 | 9.23E-07 |
| ENSG00000140090 | SLC24A4    | 5.49E+00 | 1.92E-07 | 9.52E-07 |
| ENSG00000180979 | LRRC57     | 1.10E+00 | 1.95E-07 | 9.67E-07 |
| ENSG00000197568 | HHLA3      | 2.17E+00 | 1.97E-07 | 9.77E-07 |
| ENSG00000167889 | MGAT5B     | 1.61E+00 | 1.97E-07 | 9.78E-07 |
| ENSG00000105656 | ELL        | 1.21E+00 | 2.09E-07 | 1.03E-06 |
| ENSG00000086159 | AQP6       | 6.00E+00 | 2.10E-07 | 1.04E-06 |
| ENSG00000185133 | INPP5J     | 2.38E+00 | 2.11E-07 | 1.04E-06 |
| ENSG00000163898 | LIPH       | 2.60E+00 | 2.15E-07 | 1.06E-06 |
| ENSG00000147100 | SLC16A2    | 1.57E+00 | 2.15E-07 | 1.06E-06 |
| ENSG00000167799 | NUDT8      | 2.16E+00 | 2.19E-07 | 1.08E-06 |
| ENSG00000118162 | KPTN       | 1.17E+00 | 2.24E-07 | 1.10E-06 |
| ENSG00000277013 | AC008556.1 | 5.94E+00 | 2.25E-07 | 1.11E-06 |
| ENSG00000104133 | SPG11      | 1.53E+00 | 2.32E-07 | 1.14E-06 |
| ENSG00000234719 | NPIP2      | 3.95E+00 | 2.38E-07 | 1.17E-06 |
| ENSG00000092871 | RFFL       | 1.16E+00 | 2.44E-07 | 1.20E-06 |
| ENSG00000049246 | PER3       | 1.92E+00 | 2.46E-07 | 1.21E-06 |
| ENSG00000134575 | ACP2       | 1.16E+00 | 2.61E-07 | 1.28E-06 |
| ENSG00000226979 | LTA        | 5.34E+00 | 2.65E-07 | 1.30E-06 |
| ENSG00000170909 | OSCAR      | 5.46E+00 | 2.69E-07 | 1.32E-06 |
| ENSG00000061455 | PRDM6      | 5.07E+00 | 2.69E-07 | 1.32E-06 |
| ENSG00000215440 | NPEPL1     | 2.31E+00 | 2.78E-07 | 1.36E-06 |
| ENSG00000004766 | VPS50      | 1.11E+00 | 2.81E-07 | 1.37E-06 |
| ENSG00000140092 | FBLN5      | 5.93E+00 | 2.82E-07 | 1.38E-06 |
| ENSG00000108798 | ABI3       | 5.59E+00 | 2.84E-07 | 1.39E-06 |
| ENSG00000256980 | KHDC1L     | 4.78E+00 | 2.93E-07 | 1.43E-06 |
| ENSG00000005001 | PRSS22     | 5.10E+00 | 2.94E-07 | 1.43E-06 |
| ENSG00000134571 | MYBPC3     | 6.01E+00 | 2.97E-07 | 1.45E-06 |
| ENSG00000187258 | NPSR1      | 5.73E+00 | 2.98E-07 | 1.45E-06 |

|                 |            |          |          |          |
|-----------------|------------|----------|----------|----------|
| ENSG00000102886 | GDPD3      | 2.53E+00 | 3.05E-07 | 1.48E-06 |
| ENSG00000124343 | XG         | 5.55E+00 | 3.07E-07 | 1.49E-06 |
| ENSG00000272459 | AC139795.3 | 2.47E+00 | 3.08E-07 | 1.50E-06 |
| ENSG00000111863 | ADTRP      | 3.42E+00 | 3.17E-07 | 1.54E-06 |
| ENSG00000188293 | IGFL1      | 5.56E+00 | 3.26E-07 | 1.58E-06 |
| ENSG00000103490 | PYCARD     | 3.22E+00 | 3.29E-07 | 1.59E-06 |
| ENSG00000259153 | AC004816.1 | 1.50E+00 | 3.34E-07 | 1.62E-06 |
| ENSG00000083223 | TUT7       | 1.05E+00 | 3.36E-07 | 1.63E-06 |
| ENSG00000166289 | PLEKHF1    | 2.07E+00 | 3.43E-07 | 1.66E-06 |
| ENSG00000075275 | CELSR1     | 1.21E+00 | 3.46E-07 | 1.67E-06 |
| ENSG00000268516 | AC020915.2 | 1.77E+00 | 3.47E-07 | 1.68E-06 |
| ENSG00000165731 | RET        | 5.18E+00 | 3.52E-07 | 1.70E-06 |
| ENSG00000106404 | CLDN15     | 1.27E+00 | 3.52E-07 | 1.70E-06 |
| ENSG00000100065 | CARD10     | 1.03E+00 | 3.53E-07 | 1.71E-06 |
| ENSG00000141449 | GREB1L     | 1.58E+00 | 3.60E-07 | 1.74E-06 |
| ENSG00000131096 | PYY        | 5.47E+00 | 3.61E-07 | 1.74E-06 |
| ENSG00000169946 | ZFPM2      | 6.01E+00 | 3.62E-07 | 1.74E-06 |
| ENSG00000256518 | AP000812.3 | 6.22E+00 | 3.71E-07 | 1.78E-06 |
| ENSG00000260220 | CCDC187    | 5.81E+00 | 3.77E-07 | 1.81E-06 |
| ENSG00000182022 | CHST15     | 1.76E+00 | 3.79E-07 | 1.83E-06 |
| ENSG00000132005 | RFX1       | 1.10E+00 | 3.87E-07 | 1.86E-06 |
| ENSG00000166825 | ANPEP      | 1.75E+00 | 4.02E-07 | 1.93E-06 |
| ENSG00000137491 | SLCO2B1    | 5.31E+00 | 4.07E-07 | 1.95E-06 |
| ENSG00000102003 | SYP        | 2.31E+00 | 4.12E-07 | 1.98E-06 |
| ENSG00000105321 | CCDC9      | 1.63E+00 | 4.14E-07 | 1.99E-06 |
| ENSG00000248334 | WHAMMP2    | 2.58E+00 | 4.20E-07 | 2.01E-06 |
| ENSG00000114388 | NPRL2      | 1.11E+00 | 4.21E-07 | 2.02E-06 |
| ENSG00000196420 | S100A5     | 5.52E+00 | 4.23E-07 | 2.03E-06 |
| ENSG00000187513 | GJA4       | 5.88E+00 | 4.25E-07 | 2.04E-06 |
| ENSG00000139679 | LPAR6      | 6.11E+00 | 4.39E-07 | 2.10E-06 |
| ENSG00000182749 | PAQR7      | 1.86E+00 | 4.44E-07 | 2.12E-06 |
| ENSG00000104904 | OAZ1       | 1.07E+00 | 4.51E-07 | 2.15E-06 |
| ENSG00000108306 | FBXL20     | 1.23E+00 | 4.52E-07 | 2.16E-06 |
| ENSG00000158023 | WDR66      | 3.39E+00 | 4.54E-07 | 2.17E-06 |
| ENSG00000175662 | TOM1L2     | 1.05E+00 | 4.55E-07 | 2.17E-06 |
| ENSG00000261655 | AC100803.3 | 6.32E+00 | 4.61E-07 | 2.20E-06 |
| ENSG00000179526 | SHARPIN    | 1.09E+00 | 4.65E-07 | 2.22E-06 |
| ENSG00000134363 | FST        | 1.49E+00 | 4.66E-07 | 2.22E-06 |
| ENSG00000111911 | HINT3      | 1.31E+00 | 4.72E-07 | 2.25E-06 |
| ENSG00000033627 | ATP6V0A1   | 1.03E+00 | 4.83E-07 | 2.30E-06 |
| ENSG00000074317 | SNCB       | 2.48E+00 | 5.10E-07 | 2.42E-06 |
| ENSG00000271009 | AC116667.1 | 3.01E+00 | 5.12E-07 | 2.43E-06 |
| ENSG00000166897 | ELFN2      | 2.06E+00 | 5.39E-07 | 2.55E-06 |
| ENSG00000140950 | MEAK7      | 1.29E+00 | 5.46E-07 | 2.59E-06 |
| ENSG00000135842 | NIBAN1     | 2.20E+00 | 5.47E-07 | 2.59E-06 |

|                 |            |          |          |          |
|-----------------|------------|----------|----------|----------|
| ENSG00000204498 | NFKBIL1    | 1.91E+00 | 5.54E-07 | 2.62E-06 |
| ENSG00000124602 | UNC5CL     | 5.50E+00 | 5.61E-07 | 2.65E-06 |
| ENSG00000274422 | AC245060.5 | 1.73E+00 | 5.66E-07 | 2.67E-06 |
| ENSG00000150457 | LATS2      | 1.18E+00 | 5.70E-07 | 2.69E-06 |
| ENSG00000104205 | SGK3       | 1.39E+00 | 5.71E-07 | 2.70E-06 |
| ENSG00000160182 | TFF1       | 5.34E+00 | 5.72E-07 | 2.70E-06 |
| ENSG00000196605 | ZNF846     | 2.64E+00 | 5.78E-07 | 2.72E-06 |
| ENSG00000129159 | KCNC1      | 4.72E+00 | 5.89E-07 | 2.77E-06 |
| ENSG00000062038 | CDH3       | 2.41E+00 | 6.05E-07 | 2.84E-06 |
| ENSG00000105538 | RASIP1     | 3.30E+00 | 6.08E-07 | 2.85E-06 |
| ENSG00000082438 | COBLL1     | 1.96E+00 | 6.10E-07 | 2.86E-06 |
| ENSG00000063180 | CA11       | 1.69E+00 | 6.18E-07 | 2.90E-06 |
| ENSG00000073605 | GSDMB      | 1.68E+00 | 6.20E-07 | 2.91E-06 |
| ENSG00000103152 | MPG        | 1.46E+00 | 6.27E-07 | 2.93E-06 |
| ENSG00000147174 | GCNA       | 2.19E+00 | 6.28E-07 | 2.94E-06 |
| ENSG00000103449 | SALL1      | 1.99E+00 | 6.31E-07 | 2.95E-06 |
| ENSG00000142677 | IL22RA1    | 3.63E+00 | 6.45E-07 | 3.01E-06 |
| ENSG00000185187 | SIGIRR     | 1.60E+00 | 6.56E-07 | 3.06E-06 |
| ENSG00000186654 | PRR5       | 1.92E+00 | 6.56E-07 | 3.06E-06 |
| ENSG00000144045 | DQX1       | 2.92E+00 | 6.76E-07 | 3.15E-06 |
| ENSG00000151726 | ACSL1      | 1.12E+00 | 6.81E-07 | 3.17E-06 |
| ENSG00000185101 | ANO9       | 4.99E+00 | 6.87E-07 | 3.20E-06 |
| ENSG00000184545 | DUSP8      | 1.00E+00 | 7.02E-07 | 3.27E-06 |
| ENSG00000086544 | ITPKC      | 1.23E+00 | 7.18E-07 | 3.34E-06 |
| ENSG00000266074 | BAHCC1     | 1.29E+00 | 7.21E-07 | 3.35E-06 |
| ENSG00000110315 | RNF141     | 1.35E+00 | 7.28E-07 | 3.38E-06 |
| ENSG00000137842 | TMEM62     | 1.73E+00 | 7.30E-07 | 3.39E-06 |
| ENSG00000131831 | RAI2       | 4.88E+00 | 7.31E-07 | 3.39E-06 |
| ENSG00000237172 | B3GNT9     | 1.07E+00 | 7.34E-07 | 3.41E-06 |
| ENSG00000119917 | IFIT3      | 1.37E+00 | 7.36E-07 | 3.41E-06 |
| ENSG00000106078 | COBL       | 5.24E+00 | 7.39E-07 | 3.43E-06 |
| ENSG00000185838 | GNB1L      | 1.41E+00 | 7.40E-07 | 3.43E-06 |
| ENSG00000178307 | TMEM11     | 1.34E+00 | 7.41E-07 | 3.43E-06 |
| ENSG00000187775 | DNAH17     | 3.52E+00 | 7.44E-07 | 3.45E-06 |
| ENSG00000118407 | FILIP1     | 4.14E+00 | 7.46E-07 | 3.46E-06 |
| ENSG00000124249 | KCNK15     | 4.96E+00 | 7.57E-07 | 3.50E-06 |
| ENSG00000127419 | TMEM175    | 2.30E+00 | 7.61E-07 | 3.52E-06 |
| ENSG00000205363 | INSYN1     | 2.50E+00 | 7.64E-07 | 3.54E-06 |
| ENSG00000143458 | GABPB2     | 1.21E+00 | 7.66E-07 | 3.54E-06 |
| ENSG00000148204 | CRB2       | 5.60E+00 | 7.67E-07 | 3.54E-06 |
| ENSG00000196388 | INCA1      | 3.37E+00 | 7.75E-07 | 3.58E-06 |
| ENSG00000110799 | VWF        | 3.74E+00 | 7.96E-07 | 3.67E-06 |
| ENSG00000286177 | AC011462.5 | 1.52E+00 | 8.06E-07 | 3.71E-06 |
| ENSG00000116990 | MYCL       | 2.38E+00 | 8.09E-07 | 3.73E-06 |
| ENSG00000181097 | AC105219.1 | 2.12E+00 | 8.12E-07 | 3.74E-06 |

|                 |            |          |          |          |
|-----------------|------------|----------|----------|----------|
| ENSG00000172197 | MBOAT1     | 2.11E+00 | 8.15E-07 | 3.75E-06 |
| ENSG00000174951 | FUT1       | 2.13E+00 | 8.20E-07 | 3.77E-06 |
| ENSG00000006534 | ALDH3B1    | 1.93E+00 | 8.22E-07 | 3.78E-06 |
| ENSG00000196839 | ADA        | 1.04E+00 | 8.29E-07 | 3.80E-06 |
| ENSG00000160013 | PTGIR      | 4.77E+00 | 8.29E-07 | 3.81E-06 |
| ENSG00000159640 | ACE        | 4.00E+00 | 8.41E-07 | 3.86E-06 |
| ENSG00000003137 | CYP26B1    | 1.88E+00 | 8.55E-07 | 3.92E-06 |
| ENSG00000152503 | TRIM36     | 1.81E+00 | 8.68E-07 | 3.98E-06 |
| ENSG00000182379 | NXPH4      | 1.39E+00 | 8.75E-07 | 4.01E-06 |
| ENSG00000233930 | KRTAP5-AS1 | 5.18E+00 | 8.78E-07 | 4.02E-06 |
| ENSG00000258102 | MAP1LC3B2  | 2.78E+00 | 8.83E-07 | 4.04E-06 |
| ENSG00000227051 | C14orf132  | 1.16E+00 | 8.89E-07 | 4.07E-06 |
| ENSG00000114626 | ABTB1      | 1.36E+00 | 8.97E-07 | 4.10E-06 |
| ENSG00000122547 | EEPDI      | 3.06E+00 | 9.03E-07 | 4.13E-06 |
| ENSG00000188916 | INSYN2A    | 2.91E+00 | 9.03E-07 | 4.13E-06 |
| ENSG00000236548 | RNF217-AS1 | 6.48E+00 | 9.17E-07 | 4.19E-06 |
| ENSG00000139718 | SETD1B     | 1.04E+00 | 9.53E-07 | 4.35E-06 |
| ENSG00000259904 | ACTG1P15   | 6.13E+00 | 9.75E-07 | 4.45E-06 |
| ENSG00000005102 | MEOX1      | 4.78E+00 | 9.83E-07 | 4.48E-06 |
| ENSG00000100336 | APOL4      | 5.50E+00 | 9.96E-07 | 4.54E-06 |
| ENSG00000142082 | SIRT3      | 1.75E+00 | 1.02E-06 | 4.65E-06 |
| ENSG00000006459 | KDM7A      | 1.32E+00 | 1.04E-06 | 4.74E-06 |
| ENSG00000111679 | PTPN6      | 3.49E+00 | 1.05E-06 | 4.76E-06 |
| ENSG00000136935 | GOLGA1     | 1.21E+00 | 1.08E-06 | 4.91E-06 |
| ENSG00000196267 | ZNF836     | 2.70E+00 | 1.09E-06 | 4.96E-06 |
| ENSG00000152518 | ZFP36L2    | 1.02E+00 | 1.10E-06 | 4.98E-06 |
| ENSG00000232956 | SNHG15     | 1.08E+00 | 1.11E-06 | 5.05E-06 |
| ENSG00000175600 | SUGCT      | 1.75E+00 | 1.12E-06 | 5.05E-06 |
| ENSG00000273137 | AL022328.2 | 5.71E+00 | 1.14E-06 | 5.15E-06 |
| ENSG00000101665 | SMAD7      | 1.12E+00 | 1.14E-06 | 5.15E-06 |
| ENSG00000181135 | ZNF707     | 1.52E+00 | 1.16E-06 | 5.25E-06 |
| ENSG00000268601 | AC115522.1 | 4.83E+00 | 1.18E-06 | 5.34E-06 |
| ENSG00000198788 | MUC2       | 5.90E+00 | 1.19E-06 | 5.36E-06 |
| ENSG00000273066 | AL355987.4 | 1.75E+00 | 1.20E-06 | 5.42E-06 |
| ENSG00000119943 | PYROXD2    | 4.21E+00 | 1.22E-06 | 5.52E-06 |
| ENSG00000151892 | GFRA1      | 1.31E+00 | 1.24E-06 | 5.61E-06 |
| ENSG00000167625 | ZNF526     | 1.09E+00 | 1.25E-06 | 5.63E-06 |
| ENSG00000118900 | UBN1       | 1.03E+00 | 1.25E-06 | 5.64E-06 |
| ENSG00000164972 | C9orf24    | 5.35E+00 | 1.26E-06 | 5.69E-06 |
| ENSG00000182389 | CACNB4     | 5.10E+00 | 1.30E-06 | 5.86E-06 |
| ENSG00000205488 | CALML3-AS1 | 5.66E+00 | 1.33E-06 | 5.98E-06 |
| ENSG00000040531 | CTNS       | 1.08E+00 | 1.34E-06 | 6.03E-06 |
| ENSG00000142959 | BEST4      | 5.53E+00 | 1.35E-06 | 6.04E-06 |
| ENSG00000172061 | LRRC15     | 3.32E+00 | 1.35E-06 | 6.06E-06 |
| ENSG00000109270 | LAMTOR3    | 1.04E+00 | 1.35E-06 | 6.07E-06 |

|                 |            |          |          |          |
|-----------------|------------|----------|----------|----------|
| ENSG00000088538 | DOCK3      | 2.59E+00 | 1.37E-06 | 6.14E-06 |
| ENSG00000267106 | ZNF561-AS1 | 1.61E+00 | 1.40E-06 | 6.27E-06 |
| ENSG00000140538 | NTRK3      | 4.33E+00 | 1.47E-06 | 6.56E-06 |
| ENSG00000160404 | TOR2A      | 1.03E+00 | 1.49E-06 | 6.64E-06 |
| ENSG00000120868 | APAF1      | 1.16E+00 | 1.49E-06 | 6.66E-06 |
| ENSG00000198300 | PEG3       | 5.20E+00 | 1.51E-06 | 6.74E-06 |
| ENSG00000105672 | ETV2       | 1.99E+00 | 1.52E-06 | 6.76E-06 |
| ENSG00000104722 | NEFM       | 5.56E+00 | 1.55E-06 | 6.91E-06 |
| ENSG00000172006 | ZNF554     | 2.30E+00 | 1.56E-06 | 6.93E-06 |
| ENSG00000119950 | MXI1       | 1.01E+00 | 1.56E-06 | 6.96E-06 |
| ENSG00000146085 | MMUT       | 1.06E+00 | 1.57E-06 | 6.96E-06 |
| ENSG00000213199 | ASIC3      | 3.16E+00 | 1.57E-06 | 6.97E-06 |
| ENSG00000235706 | DICER1-AS1 | 2.85E+00 | 1.58E-06 | 7.02E-06 |
| ENSG00000260086 | AC007611.1 | 5.27E+00 | 1.58E-06 | 7.03E-06 |
| ENSG00000164692 | COL1A2     | 3.25E+00 | 1.58E-06 | 7.04E-06 |
| ENSG00000141542 | RAB40B     | 1.28E+00 | 1.61E-06 | 7.15E-06 |
| ENSG00000129455 | KLK8       | 5.94E+00 | 1.63E-06 | 7.20E-06 |
| ENSG00000160188 | RSPH1      | 4.73E+00 | 1.64E-06 | 7.24E-06 |
| ENSG00000197956 | S100A6     | 2.12E+00 | 1.64E-06 | 7.26E-06 |
| ENSG00000143126 | CELSR2     | 1.77E+00 | 1.65E-06 | 7.31E-06 |
| ENSG00000196118 | CCDC189    | 1.21E+00 | 1.68E-06 | 7.43E-06 |
| ENSG00000102312 | PORCN      | 1.49E+00 | 1.69E-06 | 7.46E-06 |
| ENSG00000134780 | DAGLA      | 2.75E+00 | 1.69E-06 | 7.48E-06 |
| ENSG00000160282 | FTCD       | 3.68E+00 | 1.70E-06 | 7.53E-06 |
| ENSG00000155980 | KIF5A      | 5.24E+00 | 1.71E-06 | 7.55E-06 |
| ENSG00000065029 | ZNF76      | 1.24E+00 | 1.73E-06 | 7.62E-06 |
| ENSG00000165175 | MID1IP1    | 1.15E+00 | 1.73E-06 | 7.62E-06 |
| ENSG00000123405 | NFE2       | 3.07E+00 | 1.74E-06 | 7.66E-06 |
| ENSG00000240889 | NDUFB2-AS1 | 2.23E+00 | 1.74E-06 | 7.69E-06 |
| ENSG00000162551 | ALPL       | 4.61E+00 | 1.74E-06 | 7.69E-06 |
| ENSG00000109101 | FOXN1      | 5.89E+00 | 1.75E-06 | 7.70E-06 |
| ENSG00000269404 | SPIB       | 4.55E+00 | 1.76E-06 | 7.74E-06 |
| ENSG00000129003 | VPS13C     | 1.04E+00 | 1.82E-06 | 8.03E-06 |
| ENSG00000233695 | GAS6-AS1   | 3.60E+00 | 1.84E-06 | 8.12E-06 |
| ENSG00000155265 | GOLGA7B    | 2.80E+00 | 1.85E-06 | 8.13E-06 |
| ENSG00000198944 | SOWAHA     | 5.29E+00 | 1.85E-06 | 8.14E-06 |
| ENSG00000186442 | KRT3       | 4.59E+00 | 1.85E-06 | 8.15E-06 |
| ENSG00000204642 | HLA-F      | 1.09E+00 | 1.86E-06 | 8.16E-06 |
| ENSG00000167711 | SERPINF2   | 4.93E+00 | 1.87E-06 | 8.20E-06 |
| ENSG00000147251 | DOCK11     | 1.38E+00 | 1.99E-06 | 8.71E-06 |
| ENSG00000171124 | FUT3       | 5.61E+00 | 2.13E-06 | 9.29E-06 |
| ENSG00000140326 | CDAN1      | 1.12E+00 | 2.14E-06 | 9.33E-06 |
| ENSG00000133138 | TBC1D8B    | 3.35E+00 | 2.14E-06 | 9.37E-06 |
| ENSG00000135205 | CCDC146    | 2.37E+00 | 2.35E-06 | 1.02E-05 |
| ENSG00000128965 | CHAC1      | 1.62E+00 | 2.39E-06 | 1.04E-05 |

|                 |            |          |          |          |
|-----------------|------------|----------|----------|----------|
| ENSG00000142609 | CFAP74     | 4.98E+00 | 2.41E-06 | 1.05E-05 |
| ENSG00000165898 | ISCA2      | 1.22E+00 | 2.43E-06 | 1.06E-05 |
| ENSG00000168016 | TRANK1     | 2.02E+00 | 2.49E-06 | 1.08E-05 |
| ENSG00000175105 | ZNF654     | 1.21E+00 | 2.50E-06 | 1.09E-05 |
| ENSG00000125637 | PSD4       | 2.45E+00 | 2.51E-06 | 1.09E-05 |
| ENSG00000115687 | PASK       | 1.35E+00 | 2.52E-06 | 1.09E-05 |
| ENSG00000173991 | TCAP       | 2.66E+00 | 2.52E-06 | 1.09E-05 |
| ENSG00000225611 | LINC02158  | 4.51E+00 | 2.54E-06 | 1.10E-05 |
| ENSG00000167083 | GNGT2      | 5.49E+00 | 2.55E-06 | 1.10E-05 |
| ENSG00000120156 | TEK        | 5.09E+00 | 2.65E-06 | 1.14E-05 |
| ENSG00000146700 | SSC4D      | 4.39E+00 | 2.65E-06 | 1.15E-05 |
| ENSG00000007312 | CD79B      | 5.35E+00 | 2.66E-06 | 1.15E-05 |
| ENSG00000176834 | VSIG10     | 1.23E+00 | 2.67E-06 | 1.15E-05 |
| ENSG00000070882 | OSBPL3     | 1.47E+00 | 2.68E-06 | 1.16E-05 |
| ENSG00000099282 | TSPAN15    | 3.30E+00 | 2.71E-06 | 1.17E-05 |
| ENSG00000067191 | CACNB1     | 1.79E+00 | 2.72E-06 | 1.17E-05 |
| ENSG00000168477 | TNXB       | 3.90E+00 | 2.78E-06 | 1.20E-05 |
| ENSG00000103534 | TMC5       | 4.82E+00 | 2.79E-06 | 1.20E-05 |
| ENSG00000104848 | KCNA7      | 5.60E+00 | 2.82E-06 | 1.21E-05 |
| ENSG00000135540 | NHSL1      | 1.46E+00 | 2.83E-06 | 1.22E-05 |
| ENSG00000178401 | DNAJC22    | 4.78E+00 | 2.87E-06 | 1.24E-05 |
| ENSG00000135424 | ITGA7      | 1.83E+00 | 2.94E-06 | 1.26E-05 |
| ENSG00000141738 | GRB7       | 4.14E+00 | 2.95E-06 | 1.27E-05 |
| ENSG00000048707 | VPS13D     | 1.42E+00 | 2.95E-06 | 1.27E-05 |
| ENSG00000196132 | MYT1       | 4.01E+00 | 2.96E-06 | 1.27E-05 |
| ENSG00000215458 | AATBC      | 5.46E+00 | 2.97E-06 | 1.28E-05 |
| ENSG00000125820 | NKX2-2     | 5.31E+00 | 3.00E-06 | 1.29E-05 |
| ENSG00000163464 | CXCR1      | 5.36E+00 | 3.02E-06 | 1.29E-05 |
| ENSG00000165810 | BTNL9      | 4.51E+00 | 3.06E-06 | 1.31E-05 |
| ENSG00000244459 | AC147067.1 | 5.23E+00 | 3.07E-06 | 1.31E-05 |
| ENSG00000197614 | MFAP5      | 5.99E+00 | 3.09E-06 | 1.33E-05 |
| ENSG00000188211 | NCR3LG1    | 1.82E+00 | 3.14E-06 | 1.34E-05 |
| ENSG00000196358 | NTNG2      | 5.30E+00 | 3.19E-06 | 1.36E-05 |
| ENSG00000268751 | SCGB1B2P   | 2.41E+00 | 3.19E-06 | 1.37E-05 |
| ENSG00000147036 | LANCL3     | 5.42E+00 | 3.23E-06 | 1.38E-05 |
| ENSG00000129422 | MTUS1      | 1.03E+00 | 3.25E-06 | 1.39E-05 |
| ENSG00000152661 | GJA1       | 1.08E+00 | 3.26E-06 | 1.39E-05 |
| ENSG00000224294 | PINCR      | 2.41E+00 | 3.31E-06 | 1.41E-05 |
| ENSG00000212864 | RNF208     | 2.38E+00 | 3.32E-06 | 1.42E-05 |
| ENSG00000239697 | TNFSF12    | 2.80E+00 | 3.38E-06 | 1.44E-05 |
| ENSG00000241935 | HOGA1      | 4.81E+00 | 3.51E-06 | 1.49E-05 |
| ENSG00000253669 | GASAL1     | 1.46E+00 | 3.60E-06 | 1.53E-05 |
| ENSG00000106852 | LHX6       | 2.76E+00 | 3.60E-06 | 1.53E-05 |
| ENSG00000170175 | CHRN1      | 1.40E+00 | 3.62E-06 | 1.53E-05 |
| ENSG00000286156 | AC026273.1 | 1.73E+00 | 3.62E-06 | 1.53E-05 |

|                 |            |          |          |          |
|-----------------|------------|----------|----------|----------|
| ENSG00000260260 | SNHG19     | 1.30E+00 | 3.79E-06 | 1.60E-05 |
| ENSG00000197471 | SPN        | 5.43E+00 | 3.81E-06 | 1.61E-05 |
| ENSG00000119681 | LTBP2      | 1.01E+00 | 3.82E-06 | 1.62E-05 |
| ENSG00000157873 | TNFRSF14   | 3.49E+00 | 3.87E-06 | 1.64E-05 |
| ENSG00000184363 | PKP3       | 3.31E+00 | 3.88E-06 | 1.64E-05 |
| ENSG00000174600 | CMKLR1     | 2.91E+00 | 3.89E-06 | 1.65E-05 |
| ENSG00000117115 | PADI2      | 4.85E+00 | 3.90E-06 | 1.65E-05 |
| ENSG00000260103 | AC012435.2 | 4.01E+00 | 3.92E-06 | 1.66E-05 |
| ENSG00000235954 | TTC28-AS1  | 1.71E+00 | 3.94E-06 | 1.66E-05 |
| ENSG00000112195 | TREML2     | 5.31E+00 | 3.98E-06 | 1.68E-05 |
| ENSG00000196433 | ASMT       | 5.11E+00 | 4.02E-06 | 1.70E-05 |
| ENSG00000104936 | DMPK       | 1.24E+00 | 4.05E-06 | 1.71E-05 |
| ENSG00000107317 | PTGDS      | 4.79E+00 | 4.10E-06 | 1.73E-05 |
| ENSG00000197406 | DIO3       | 5.45E+00 | 4.12E-06 | 1.73E-05 |
| ENSG00000171346 | KRT15      | 2.94E+00 | 4.22E-06 | 1.77E-05 |
| ENSG00000119514 | GALNT12    | 2.99E+00 | 4.24E-06 | 1.78E-05 |
| ENSG00000174899 | SLC66A1L   | 5.87E+00 | 4.26E-06 | 1.79E-05 |
| ENSG00000144130 | NT5DC4     | 5.29E+00 | 4.38E-06 | 1.84E-05 |
| ENSG00000185798 | WDR53      | 1.03E+00 | 4.39E-06 | 1.84E-05 |
| ENSG00000160447 | PKN3       | 1.74E+00 | 4.39E-06 | 1.84E-05 |
| ENSG00000164171 | ITGA2      | 1.11E+00 | 4.39E-06 | 1.84E-05 |
| ENSG00000261239 | ANKRD26P1  | 5.31E+00 | 4.39E-06 | 1.84E-05 |
| ENSG00000185615 | PDIA2      | 3.09E+00 | 4.43E-06 | 1.86E-05 |
| ENSG00000197933 | ZNF823     | 1.59E+00 | 4.52E-06 | 1.89E-05 |
| ENSG00000173267 | SNCG       | 2.31E+00 | 4.53E-06 | 1.90E-05 |
| ENSG00000082497 | SERTAD4    | 2.20E+00 | 4.56E-06 | 1.91E-05 |
| ENSG00000125895 | TMEM74B    | 2.62E+00 | 4.57E-06 | 1.91E-05 |
| ENSG00000101203 | COL20A1    | 5.90E+00 | 4.71E-06 | 1.97E-05 |
| ENSG00000106524 | ANKMY2     | 1.19E+00 | 4.73E-06 | 1.97E-05 |
| ENSG00000153234 | NR4A2      | 3.74E+00 | 4.81E-06 | 2.01E-05 |
| ENSG00000196218 | RYR1       | 4.27E+00 | 4.81E-06 | 2.01E-05 |
| ENSG00000167895 | TMC8       | 4.49E+00 | 4.89E-06 | 2.04E-05 |
| ENSG00000073331 | ALPK1      | 2.33E+00 | 4.95E-06 | 2.06E-05 |
| ENSG00000163520 | FBLN2      | 3.40E+00 | 5.07E-06 | 2.11E-05 |
| ENSG00000100150 | DEPDC5     | 1.50E+00 | 5.24E-06 | 2.17E-05 |
| ENSG00000089692 | LAG3       | 1.83E+00 | 5.28E-06 | 2.19E-05 |
| ENSG00000223773 | CD99P1     | 2.92E+00 | 5.29E-06 | 2.19E-05 |
| ENSG00000074755 | ZZEF1      | 1.00E+00 | 5.38E-06 | 2.23E-05 |
| ENSG00000088340 | FER1L4     | 3.55E+00 | 5.44E-06 | 2.25E-05 |
| ENSG00000142149 | HUNK       | 1.41E+00 | 5.57E-06 | 2.30E-05 |
| ENSG00000232070 | TMEM253    | 4.23E+00 | 5.73E-06 | 2.37E-05 |
| ENSG00000167654 | ATCAY      | 4.64E+00 | 5.78E-06 | 2.39E-05 |
| ENSG00000269821 | KCNQ1OT1   | 1.33E+00 | 5.82E-06 | 2.40E-05 |
| ENSG00000072121 | ZFYVE26    | 1.27E+00 | 6.22E-06 | 2.56E-05 |
| ENSG00000182704 | TSKU       | 1.03E+00 | 6.23E-06 | 2.57E-05 |

|                 |            |          |          |          |
|-----------------|------------|----------|----------|----------|
| ENSG00000204385 | SLC44A4    | 5.76E+00 | 6.24E-06 | 2.57E-05 |
| ENSG00000178404 | CEP295NL   | 4.71E+00 | 6.38E-06 | 2.63E-05 |
| ENSG00000287170 | AC010327.8 | 5.38E+00 | 6.45E-06 | 2.65E-05 |
| ENSG00000197530 | MIB2       | 1.02E+00 | 6.59E-06 | 2.71E-05 |
| ENSG00000104522 | TSTA3      | 1.21E+00 | 6.65E-06 | 2.73E-05 |
| ENSG00000198807 | PAX9       | 5.10E+00 | 6.76E-06 | 2.77E-05 |
| ENSG00000203883 | SOX18      | 2.73E+00 | 6.83E-06 | 2.80E-05 |
| ENSG00000078900 | TP73       | 1.41E+00 | 6.84E-06 | 2.80E-05 |
| ENSG00000198223 | CSF2RA     | 4.64E+00 | 6.90E-06 | 2.82E-05 |
| ENSG00000139880 | CDH24      | 1.66E+00 | 7.11E-06 | 2.91E-05 |
| ENSG00000137507 | LRRC32     | 5.23E+00 | 7.16E-06 | 2.93E-05 |
| ENSG00000100949 | RABGGTA    | 1.02E+00 | 7.20E-06 | 2.94E-05 |
| ENSG00000105655 | ISYNA1     | 1.50E+00 | 7.20E-06 | 2.94E-05 |
| ENSG00000260807 | AC009041.2 | 5.45E+00 | 7.27E-06 | 2.97E-05 |
| ENSG00000145214 | DGKQ       | 1.14E+00 | 7.33E-06 | 2.99E-05 |
| ENSG00000126368 | NR1D1      | 1.56E+00 | 7.33E-06 | 2.99E-05 |
| ENSG00000168490 | PHYHIP     | 2.03E+00 | 7.43E-06 | 3.03E-05 |
| ENSG00000233493 | TMEM238    | 2.91E+00 | 7.45E-06 | 3.03E-05 |
| ENSG00000060558 | GNA15      | 2.84E+00 | 7.61E-06 | 3.10E-05 |
| ENSG00000135144 | DTX1       | 5.51E+00 | 7.63E-06 | 3.10E-05 |
| ENSG00000037280 | FLT4       | 3.26E+00 | 7.91E-06 | 3.21E-05 |
| ENSG00000253741 | LNCOC1     | 4.60E+00 | 8.02E-06 | 3.26E-05 |
| ENSG00000164620 | RELL2      | 1.40E+00 | 8.03E-06 | 3.26E-05 |
| ENSG00000008735 | MAPK8IP2   | 1.64E+00 | 8.19E-06 | 3.32E-05 |
| ENSG00000161328 | LRRC56     | 3.09E+00 | 8.23E-06 | 3.33E-05 |
| ENSG00000116096 | SPR        | 1.25E+00 | 8.25E-06 | 3.34E-05 |
| ENSG00000179023 | KLHDC7A    | 4.37E+00 | 8.26E-06 | 3.34E-05 |
| ENSG00000276600 | RAB7B      | 1.62E+00 | 8.30E-06 | 3.36E-05 |
| ENSG00000105088 | OLFM2      | 2.11E+00 | 8.34E-06 | 3.37E-05 |
| ENSG00000166387 | PPFIBP2    | 3.73E+00 | 8.38E-06 | 3.39E-05 |
| ENSG00000214401 | KANSL1-AS1 | 1.58E+00 | 8.40E-06 | 3.39E-05 |
| ENSG00000261040 | WFDC21P    | 1.75E+00 | 8.43E-06 | 3.41E-05 |
| ENSG00000105143 | SLC1A6     | 5.63E+00 | 8.57E-06 | 3.46E-05 |
| ENSG00000253438 | PCAT1      | 3.59E+00 | 8.58E-06 | 3.46E-05 |
| ENSG00000143774 | GUK1       | 1.41E+00 | 8.59E-06 | 3.46E-05 |
| ENSG00000261308 | FIGNL2     | 3.91E+00 | 8.72E-06 | 3.52E-05 |
| ENSG00000177464 | GPR4       | 3.04E+00 | 8.82E-06 | 3.55E-05 |
| ENSG00000188599 | NPIPP1     | 1.50E+00 | 8.91E-06 | 3.59E-05 |
| ENSG00000188549 | CCDC9B     | 1.46E+00 | 8.93E-06 | 3.60E-05 |
| ENSG00000232973 | CYP1B1-AS1 | 3.39E+00 | 8.97E-06 | 3.61E-05 |
| ENSG00000182771 | GRID1      | 5.30E+00 | 9.01E-06 | 3.62E-05 |
| ENSG00000109016 | DHRS7B     | 1.03E+00 | 9.11E-06 | 3.66E-05 |
| ENSG00000118420 | UBE3D      | 1.04E+00 | 9.25E-06 | 3.72E-05 |
| ENSG00000197405 | C5AR1      | 3.34E+00 | 9.37E-06 | 3.76E-05 |
| ENSG00000177025 | C19orf18   | 3.00E+00 | 9.42E-06 | 3.78E-05 |



|                 |            |          |          |          |
|-----------------|------------|----------|----------|----------|
| ENSG00000262898 | AC139099.2 | 5.48E+00 | 9.46E-06 | 3.79E-05 |
| ENSG00000135441 | BLOC1S1    | 1.31E+00 | 9.50E-06 | 3.81E-05 |
| ENSG00000130300 | PLVAP      | 5.29E+00 | 9.56E-06 | 3.83E-05 |
| ENSG00000243176 | AC092944.1 | 2.22E+00 | 9.64E-06 | 3.86E-05 |
| ENSG00000123415 | SMUG1      | 1.14E+00 | 9.67E-06 | 3.87E-05 |
| ENSG00000069812 | HES2       | 2.68E+00 | 9.71E-06 | 3.89E-05 |
| ENSG00000068971 | PPP2R5B    | 1.18E+00 | 1.02E-05 | 4.09E-05 |
| ENSG00000126500 | FLRT1      | 4.34E+00 | 1.03E-05 | 4.11E-05 |
| ENSG00000068976 | PYGM       | 3.73E+00 | 1.06E-05 | 4.23E-05 |
| ENSG00000232237 | ASCL5      | 5.53E+00 | 1.06E-05 | 4.24E-05 |
| ENSG00000186951 | PPARA      | 1.09E+00 | 1.07E-05 | 4.26E-05 |
| ENSG00000241255 | AL136126.1 | 4.63E+00 | 1.08E-05 | 4.31E-05 |
| ENSG00000160838 | LRRC71     | 5.97E+00 | 1.08E-05 | 4.33E-05 |
| ENSG00000115718 | PROC       | 3.52E+00 | 1.09E-05 | 4.34E-05 |
| ENSG00000143198 | MGST3      | 1.22E+00 | 1.10E-05 | 4.39E-05 |
| ENSG00000163347 | CLDN1      | 1.47E+00 | 1.10E-05 | 4.40E-05 |
| ENSG00000089847 | ANKRD24    | 4.62E+00 | 1.11E-05 | 4.43E-05 |
| ENSG00000178585 | CTNNBIP1   | 1.02E+00 | 1.14E-05 | 4.52E-05 |
| ENSG00000104870 | FCGRT      | 2.75E+00 | 1.14E-05 | 4.54E-05 |
| ENSG00000244558 | KCNK15-AS1 | 4.87E+00 | 1.15E-05 | 4.57E-05 |
| ENSG00000060762 | MPC1       | 1.08E+00 | 1.16E-05 | 4.59E-05 |
| ENSG00000236935 | AP003774.2 | 5.13E+00 | 1.17E-05 | 4.63E-05 |
| ENSG00000142408 | CACNG8     | 1.07E+00 | 1.18E-05 | 4.66E-05 |
| ENSG00000137628 | DDX60      | 1.37E+00 | 1.19E-05 | 4.72E-05 |
| ENSG00000258128 | MKRN9P     | 5.52E+00 | 1.20E-05 | 4.75E-05 |
| ENSG00000143412 | ANXA9      | 5.36E+00 | 1.21E-05 | 4.77E-05 |
| ENSG00000073737 | DHRS9      | 5.11E+00 | 1.21E-05 | 4.78E-05 |
| ENSG00000197969 | VPS13A     | 1.04E+00 | 1.21E-05 | 4.79E-05 |
| ENSG00000105619 | TFPT       | 1.12E+00 | 1.24E-05 | 4.88E-05 |
| ENSG00000272836 | AL022328.1 | 4.84E+00 | 1.25E-05 | 4.93E-05 |
| ENSG00000167414 | GNG8       | 4.87E+00 | 1.25E-05 | 4.93E-05 |
| ENSG00000254338 | MAFA-AS1   | 4.70E+00 | 1.27E-05 | 5.00E-05 |
| ENSG00000008516 | MMP25      | 2.10E+00 | 1.27E-05 | 5.00E-05 |
| ENSG00000226742 | HSBP1L1    | 1.72E+00 | 1.27E-05 | 5.02E-05 |
| ENSG00000069188 | SDK2       | 4.76E+00 | 1.28E-05 | 5.03E-05 |
| ENSG00000276075 | AC027682.6 | 3.25E+00 | 1.28E-05 | 5.04E-05 |
| ENSG00000239998 | LILRA2     | 5.53E+00 | 1.30E-05 | 5.11E-05 |
| ENSG00000186472 | PCLO       | 1.28E+00 | 1.30E-05 | 5.12E-05 |
| ENSG00000179044 | EXOC3L1    | 4.85E+00 | 1.32E-05 | 5.20E-05 |
| ENSG00000213398 | LCAT       | 1.52E+00 | 1.32E-05 | 5.20E-05 |
| ENSG00000165868 | HSPA12A    | 1.08E+00 | 1.33E-05 | 5.21E-05 |
| ENSG00000123358 | NR4A1      | 1.04E+00 | 1.35E-05 | 5.30E-05 |
| ENSG00000181409 | AATK       | 4.09E+00 | 1.37E-05 | 5.35E-05 |
| ENSG00000248161 | AC098487.1 | 2.11E+00 | 1.38E-05 | 5.40E-05 |
| ENSG00000163803 | PLB1       | 4.26E+00 | 1.39E-05 | 5.42E-05 |

|                 |             |          |          |          |
|-----------------|-------------|----------|----------|----------|
| ENSG00000197653 | DNAH10      | 5.19E+00 | 1.39E-05 | 5.42E-05 |
| ENSG00000166170 | BAG5        | 1.01E+00 | 1.39E-05 | 5.43E-05 |
| ENSG00000287396 | AL592464.3  | 5.07E+00 | 1.39E-05 | 5.43E-05 |
| ENSG00000203900 | AL121827.1  | 5.25E+00 | 1.40E-05 | 5.46E-05 |
| ENSG00000099889 | ARVCF       | 1.33E+00 | 1.40E-05 | 5.48E-05 |
| ENSG00000123636 | BAZ2B       | 1.17E+00 | 1.44E-05 | 5.63E-05 |
| ENSG00000164520 | RAET1E      | 4.34E+00 | 1.46E-05 | 5.69E-05 |
| ENSG00000120913 | PDLIM2      | 1.24E+00 | 1.47E-05 | 5.74E-05 |
| ENSG00000204681 | GABBR1      | 1.13E+00 | 1.48E-05 | 5.75E-05 |
| ENSG00000100968 | NFATC4      | 5.16E+00 | 1.49E-05 | 5.81E-05 |
| ENSG00000171345 | KRT19       | 6.25E+00 | 1.50E-05 | 5.84E-05 |
| ENSG00000188176 | SMTNL2      | 3.79E+00 | 1.50E-05 | 5.85E-05 |
| ENSG00000137648 | TMPRSS4     | 5.56E+00 | 1.51E-05 | 5.87E-05 |
| ENSG00000100918 | REC8        | 2.16E+00 | 1.52E-05 | 5.92E-05 |
| ENSG00000158856 | DMTN        | 2.24E+00 | 1.52E-05 | 5.92E-05 |
| ENSG00000158315 | RHBDL2      | 4.36E+00 | 1.53E-05 | 5.95E-05 |
| ENSG00000175206 | NPPA        | 5.38E+00 | 1.54E-05 | 5.99E-05 |
| ENSG00000162482 | AKR7A3      | 4.70E+00 | 1.55E-05 | 6.02E-05 |
| ENSG00000265190 | ANXA8       | 2.92E+00 | 1.56E-05 | 6.06E-05 |
| ENSG00000160145 | KALRN       | 1.09E+00 | 1.60E-05 | 6.22E-05 |
| ENSG00000234546 | LNCTAM34A   | 2.99E+00 | 1.62E-05 | 6.26E-05 |
| ENSG00000171790 | SLFNL1      | 5.31E+00 | 1.64E-05 | 6.33E-05 |
| ENSG00000281404 | LINC01176   | 4.72E+00 | 1.64E-05 | 6.36E-05 |
| ENSG00000261092 | LINC02178   | 5.50E+00 | 1.66E-05 | 6.41E-05 |
| ENSG00000168661 | ZNF30       | 2.37E+00 | 1.70E-05 | 6.58E-05 |
| ENSG00000185924 | RTN4RL1     | 1.93E+00 | 1.71E-05 | 6.60E-05 |
| ENSG00000125845 | BMP2        | 3.13E+00 | 1.73E-05 | 6.67E-05 |
| ENSG00000255642 | PABPC1P4    | 1.77E+00 | 1.73E-05 | 6.69E-05 |
| ENSG00000265096 | C1QTNF1-AS1 | 2.68E+00 | 1.74E-05 | 6.71E-05 |
| ENSG00000264148 | AC138207.3  | 4.07E+00 | 1.76E-05 | 6.78E-05 |
| ENSG00000166257 | SCN3B       | 2.93E+00 | 1.79E-05 | 6.87E-05 |
| ENSG00000254815 | AP006284.1  | 5.55E+00 | 1.80E-05 | 6.93E-05 |
| ENSG00000224721 | AC007182.1  | 5.56E+00 | 1.83E-05 | 7.02E-05 |
| ENSG00000268223 | ARL14EPL    | 4.80E+00 | 1.83E-05 | 7.03E-05 |
| ENSG00000180264 | ADGRD2      | 5.39E+00 | 1.87E-05 | 7.17E-05 |
| ENSG00000007545 | CRAMP1      | 1.29E+00 | 1.87E-05 | 7.18E-05 |
| ENSG00000147394 | ZNF185      | 2.48E+00 | 1.88E-05 | 7.20E-05 |
| ENSG00000130528 | HRC         | 5.10E+00 | 1.88E-05 | 7.22E-05 |
| ENSG00000122133 | PAEP        | 5.36E+00 | 1.94E-05 | 7.44E-05 |
| ENSG00000143512 | HHIPL2      | 4.04E+00 | 1.99E-05 | 7.60E-05 |
| ENSG00000163141 | BNIPL       | 3.69E+00 | 2.01E-05 | 7.65E-05 |
| ENSG00000198650 | TAT         | 5.69E+00 | 2.03E-05 | 7.74E-05 |
| ENSG00000159496 | RGL4        | 5.31E+00 | 2.04E-05 | 7.78E-05 |
| ENSG00000124641 | MED20       | 1.32E+00 | 2.05E-05 | 7.82E-05 |
| ENSG00000185269 | NOTUM       | 5.54E+00 | 2.06E-05 | 7.85E-05 |

|                 |            |          |          |          |
|-----------------|------------|----------|----------|----------|
| ENSG00000132196 | HSD17B7    | 1.44E+00 | 2.06E-05 | 7.86E-05 |
| ENSG00000148356 | LRSAM1     | 1.35E+00 | 2.08E-05 | 7.89E-05 |
| ENSG00000179388 | EGR3       | 1.52E+00 | 2.08E-05 | 7.91E-05 |
| ENSG00000174151 | CYB561D1   | 1.11E+00 | 2.10E-05 | 7.98E-05 |
| ENSG00000180871 | CXCR2      | 4.96E+00 | 2.13E-05 | 8.10E-05 |
| ENSG00000172426 | RSPH9      | 4.72E+00 | 2.15E-05 | 8.15E-05 |
| ENSG00000154134 | ROBO3      | 1.24E+00 | 2.16E-05 | 8.20E-05 |
| ENSG00000116991 | SIPA1L2    | 1.22E+00 | 2.17E-05 | 8.23E-05 |
| ENSG00000128654 | MTX2       | 1.00E+00 | 2.17E-05 | 8.23E-05 |
| ENSG00000169239 | CA5B       | 1.29E+00 | 2.18E-05 | 8.27E-05 |
| ENSG00000141540 | TTYH2      | 2.10E+00 | 2.19E-05 | 8.28E-05 |
| ENSG00000285529 | AC016816.1 | 5.80E+00 | 2.19E-05 | 8.31E-05 |
| ENSG00000183034 | OTOP2      | 5.80E+00 | 2.21E-05 | 8.36E-05 |
| ENSG00000177000 | MTHFR      | 1.47E+00 | 2.24E-05 | 8.46E-05 |
| ENSG00000197253 | TPSB2      | 5.00E+00 | 2.24E-05 | 8.47E-05 |
| ENSG00000029534 | ANK1       | 1.39E+00 | 2.24E-05 | 8.49E-05 |
| ENSG00000178149 | DALRD3     | 1.27E+00 | 2.25E-05 | 8.50E-05 |
| ENSG00000163624 | CDS1       | 2.83E+00 | 2.25E-05 | 8.51E-05 |
| ENSG00000170477 | KRT4       | 5.57E+00 | 2.26E-05 | 8.56E-05 |
| ENSG00000249042 | AC008771.1 | 1.31E+00 | 2.28E-05 | 8.61E-05 |
| ENSG00000120925 | RNF170     | 1.05E+00 | 2.30E-05 | 8.69E-05 |
| ENSG00000108381 | ASPA       | 5.05E+00 | 2.32E-05 | 8.73E-05 |
| ENSG00000228288 | PCAT6      | 4.63E+00 | 2.37E-05 | 8.93E-05 |
| ENSG00000141665 | FBXO15     | 4.49E+00 | 2.37E-05 | 8.94E-05 |
| ENSG00000108786 | HSD17B1    | 2.25E+00 | 2.40E-05 | 9.03E-05 |
| ENSG00000053918 | KCNQ1      | 5.32E+00 | 2.42E-05 | 9.10E-05 |
| ENSG00000131409 | LRRC4B     | 1.23E+00 | 2.42E-05 | 9.12E-05 |
| ENSG00000010318 | PHF7       | 1.42E+00 | 2.47E-05 | 9.30E-05 |
| ENSG00000090006 | LTBP4      | 1.23E+00 | 2.48E-05 | 9.31E-05 |
| ENSG00000135951 | TSGA10     | 1.42E+00 | 2.51E-05 | 9.44E-05 |
| ENSG00000188755 | TBC1D3P2   | 5.16E+00 | 2.53E-05 | 9.48E-05 |
| ENSG00000171914 | TLN2       | 1.29E+00 | 2.54E-05 | 9.53E-05 |
| ENSG00000133424 | LARGE1     | 1.82E+00 | 2.55E-05 | 9.56E-05 |
| ENSG00000243284 | VSIG8      | 4.15E+00 | 2.56E-05 | 9.61E-05 |
| ENSG00000179832 | MROH1      | 1.65E+00 | 2.57E-05 | 9.64E-05 |
| ENSG00000215644 | GCGR       | 4.42E+00 | 2.57E-05 | 9.64E-05 |
| ENSG00000012211 | PRICKLE3   | 4.42E+00 | 2.60E-05 | 9.74E-05 |
| ENSG00000113749 | HRH2       | 4.36E+00 | 2.64E-05 | 9.87E-05 |
| ENSG00000180438 | TPRXL      | 5.78E+00 | 2.66E-05 | 9.95E-05 |
| ENSG00000120075 | HOXB5      | 1.52E+00 | 2.67E-05 | 9.97E-05 |
| ENSG00000188493 | C19orf54   | 1.50E+00 | 2.70E-05 | 1.01E-04 |
| ENSG00000244310 | AC093904.3 | 5.11E+00 | 2.70E-05 | 1.01E-04 |
| ENSG00000103174 | NAGPA      | 1.25E+00 | 2.71E-05 | 1.01E-04 |
| ENSG00000162494 | LRRC38     | 2.32E+00 | 2.72E-05 | 1.02E-04 |
| ENSG00000266088 | AC004585.1 | 5.52E+00 | 2.73E-05 | 1.02E-04 |

|                 |            |          |          |          |
|-----------------|------------|----------|----------|----------|
| ENSG00000070729 | CNGB1      | 5.15E+00 | 2.77E-05 | 1.03E-04 |
| ENSG00000167741 | GGT6       | 5.59E+00 | 2.80E-05 | 1.04E-04 |
| ENSG00000168874 | ATOH8      | 3.08E+00 | 2.81E-05 | 1.05E-04 |
| ENSG00000049540 | ELN        | 4.76E+00 | 2.84E-05 | 1.06E-04 |
| ENSG00000100341 | PNPLA5     | 5.54E+00 | 2.84E-05 | 1.06E-04 |
| ENSG00000136878 | USP20      | 2.51E+00 | 2.91E-05 | 1.08E-04 |
| ENSG00000143556 | S100A7     | 5.04E+00 | 2.94E-05 | 1.09E-04 |
| ENSG00000198001 | IRAK4      | 1.44E+00 | 2.96E-05 | 1.10E-04 |
| ENSG00000283196 | AC006453.2 | 1.50E+00 | 3.00E-05 | 1.11E-04 |
| ENSG00000129595 | EPB41L4A   | 5.43E+00 | 3.01E-05 | 1.11E-04 |
| ENSG00000182621 | PLCB1      | 4.96E+00 | 3.01E-05 | 1.11E-04 |
| ENSG00000108576 | SLC6A4     | 4.80E+00 | 3.04E-05 | 1.12E-04 |
| ENSG00000169418 | NPR1       | 3.96E+00 | 3.05E-05 | 1.13E-04 |
| ENSG00000052795 | FNIP2      | 1.13E+00 | 3.08E-05 | 1.14E-04 |
| ENSG00000110195 | FOLR1      | 5.11E+00 | 3.09E-05 | 1.14E-04 |
| ENSG00000009950 | MLXIPL     | 4.68E+00 | 3.13E-05 | 1.15E-04 |
| ENSG00000188295 | ZNF669     | 2.10E+00 | 3.13E-05 | 1.15E-04 |
| ENSG00000113522 | RAD50      | 2.16E+00 | 3.13E-05 | 1.15E-04 |
| ENSG00000277778 | PGM5P2     | 1.46E+00 | 3.13E-05 | 1.16E-04 |
| ENSG00000266473 | AC007448.4 | 4.81E+00 | 3.15E-05 | 1.16E-04 |
| ENSG00000106633 | GCK        | 3.28E+00 | 3.16E-05 | 1.16E-04 |
| ENSG00000059915 | PSD        | 1.79E+00 | 3.21E-05 | 1.18E-04 |
| ENSG00000197487 | GALP       | 5.79E+00 | 3.26E-05 | 1.20E-04 |
| ENSG00000223820 | CFL1P1     | 3.80E+00 | 3.27E-05 | 1.20E-04 |
| ENSG00000253692 | IGHEP1     | 5.33E+00 | 3.27E-05 | 1.20E-04 |
| ENSG00000145247 | OCIAD2     | 1.03E+00 | 3.29E-05 | 1.21E-04 |
| ENSG00000182809 | CRIP2      | 1.10E+00 | 3.33E-05 | 1.22E-04 |
| ENSG00000262454 | MIR193BHG  | 1.72E+00 | 3.33E-05 | 1.22E-04 |
| ENSG00000117643 | MAN1C1     | 2.18E+00 | 3.34E-05 | 1.22E-04 |
| ENSG00000255860 | AP000812.2 | 4.66E+00 | 3.40E-05 | 1.24E-04 |
| ENSG00000287200 | AC022506.2 | 4.53E+00 | 3.46E-05 | 1.27E-04 |
| ENSG00000104972 | LILRB1     | 4.78E+00 | 3.54E-05 | 1.29E-04 |
| ENSG00000142538 | PTH2       | 5.28E+00 | 3.58E-05 | 1.31E-04 |
| ENSG00000167619 | TMEM145    | 2.39E+00 | 3.58E-05 | 1.31E-04 |
| ENSG00000277449 | CEBPB-AS1  | 2.18E+00 | 3.61E-05 | 1.32E-04 |
| ENSG00000110876 | SELPLG     | 2.48E+00 | 3.67E-05 | 1.34E-04 |
| ENSG00000261278 | AC009094.1 | 5.20E+00 | 3.70E-05 | 1.35E-04 |
| ENSG00000183155 | RABIF      | 1.15E+00 | 3.72E-05 | 1.35E-04 |
| ENSG00000214013 | GANC       | 1.35E+00 | 3.81E-05 | 1.39E-04 |
| ENSG00000138678 | GPAT3      | 2.26E+00 | 3.81E-05 | 1.39E-04 |
| ENSG00000272767 | JMJD1C-AS1 | 3.38E+00 | 3.92E-05 | 1.43E-04 |
| ENSG00000196188 | CTSE       | 5.70E+00 | 3.95E-05 | 1.44E-04 |
| ENSG00000236301 | MRGPRG-AS1 | 5.04E+00 | 4.01E-05 | 1.46E-04 |
| ENSG00000124496 | TRERF1     | 1.14E+00 | 4.10E-05 | 1.49E-04 |
| ENSG00000171219 | CDC42BPG   | 2.56E+00 | 4.10E-05 | 1.49E-04 |

|                 |            |          |          |          |
|-----------------|------------|----------|----------|----------|
| ENSG00000104983 | CCDC61     | 1.72E+00 | 4.11E-05 | 1.49E-04 |
| ENSG00000143303 | RRNAD1     | 1.34E+00 | 4.11E-05 | 1.49E-04 |
| ENSG00000146556 | WASH2P     | 3.60E+00 | 4.16E-05 | 1.51E-04 |
| ENSG00000173269 | MMRN2      | 3.88E+00 | 4.20E-05 | 1.52E-04 |
| ENSG00000275216 | AL161431.1 | 4.91E+00 | 4.21E-05 | 1.52E-04 |
| ENSG00000173890 | GPR160     | 2.32E+00 | 4.21E-05 | 1.52E-04 |
| ENSG00000104154 | SLC30A4    | 1.72E+00 | 4.25E-05 | 1.54E-04 |
| ENSG00000163995 | ABLIM2     | 4.21E+00 | 4.31E-05 | 1.56E-04 |
| ENSG00000267607 | AC011511.5 | 4.55E+00 | 4.32E-05 | 1.56E-04 |
| ENSG00000215910 | C1orf167   | 5.16E+00 | 4.33E-05 | 1.56E-04 |
| ENSG00000160796 | NBEAL2     | 1.55E+00 | 4.37E-05 | 1.58E-04 |
| ENSG00000172346 | CSDC2      | 1.85E+00 | 4.40E-05 | 1.59E-04 |
| ENSG00000162341 | TPCN2      | 1.60E+00 | 4.42E-05 | 1.59E-04 |
| ENSG00000170423 | KRT78      | 4.61E+00 | 4.45E-05 | 1.61E-04 |
| ENSG00000218052 | ADAMTS7P4  | 4.27E+00 | 4.47E-05 | 1.61E-04 |
| ENSG00000186716 | BCR        | 1.06E+00 | 4.47E-05 | 1.61E-04 |
| ENSG00000155962 | CLIC2      | 3.92E+00 | 4.47E-05 | 1.61E-04 |
| ENSG00000176136 | MC5R       | 4.74E+00 | 4.48E-05 | 1.61E-04 |
| ENSG00000102575 | ACP5       | 4.91E+00 | 4.50E-05 | 1.62E-04 |
| ENSG00000138622 | HCN4       | 3.20E+00 | 4.53E-05 | 1.63E-04 |
| ENSG00000261514 | LINC01976  | 5.25E+00 | 4.53E-05 | 1.63E-04 |
| ENSG00000164265 | SCGB3A2    | 5.00E+00 | 4.54E-05 | 1.63E-04 |
| ENSG00000091129 | NRCAM      | 4.17E+00 | 4.63E-05 | 1.67E-04 |
| ENSG00000090674 | MCOLN1     | 1.49E+00 | 4.66E-05 | 1.67E-04 |
| ENSG00000166225 | FRS2       | 1.09E+00 | 4.67E-05 | 1.68E-04 |
| ENSG00000186897 | C1QL4      | 1.64E+00 | 4.77E-05 | 1.71E-04 |
| ENSG00000160190 | SLC37A1    | 2.83E+00 | 4.80E-05 | 1.72E-04 |
| ENSG00000135406 | PRPH       | 5.49E+00 | 4.81E-05 | 1.73E-04 |
| ENSG00000163958 | ZDHHC19    | 2.42E+00 | 4.83E-05 | 1.73E-04 |
| ENSG00000184012 | TMPRSS2    | 2.57E+00 | 4.83E-05 | 1.73E-04 |
| ENSG00000123364 | HOXC13     | 1.18E+00 | 4.85E-05 | 1.74E-04 |
| ENSG00000095303 | PTGS1      | 2.85E+00 | 4.86E-05 | 1.74E-04 |
| ENSG00000272933 | AL391121.1 | 2.81E+00 | 4.87E-05 | 1.74E-04 |
| ENSG00000225511 | LINC00475  | 2.45E+00 | 4.89E-05 | 1.75E-04 |
| ENSG00000136040 | PLXNC1     | 2.21E+00 | 4.92E-05 | 1.76E-04 |
| ENSG00000162383 | SLC1A7     | 5.49E+00 | 4.93E-05 | 1.77E-04 |
| ENSG00000175463 | TBC1D10C   | 5.71E+00 | 4.95E-05 | 1.77E-04 |
| ENSG00000115649 | CNPPD1     | 1.18E+00 | 4.96E-05 | 1.77E-04 |
| ENSG00000183248 | PRR36      | 4.57E+00 | 4.96E-05 | 1.78E-04 |
| ENSG00000078081 | LAMP3      | 2.05E+00 | 4.97E-05 | 1.78E-04 |
| ENSG00000174446 | SNAPC5     | 1.13E+00 | 4.98E-05 | 1.78E-04 |
| ENSG00000137709 | POU2F3     | 5.38E+00 | 4.99E-05 | 1.78E-04 |
| ENSG00000114383 | TUSC2      | 1.19E+00 | 5.02E-05 | 1.80E-04 |
| ENSG00000163536 | SERPINI1   | 2.89E+00 | 5.15E-05 | 1.84E-04 |
| ENSG00000137642 | SORL1      | 3.37E+00 | 5.18E-05 | 1.85E-04 |

|                 |            |          |          |          |
|-----------------|------------|----------|----------|----------|
| ENSG00000159339 | PADI4      | 2.80E+00 | 5.18E-05 | 1.85E-04 |
| ENSG00000156414 | TDRD9      | 4.97E+00 | 5.18E-05 | 1.85E-04 |
| ENSG00000188100 | FAM25A     | 5.18E+00 | 5.30E-05 | 1.89E-04 |
| ENSG00000179627 | ZBTB42     | 2.30E+00 | 5.37E-05 | 1.91E-04 |
| ENSG00000137841 | PLCB2      | 4.86E+00 | 5.38E-05 | 1.91E-04 |
| ENSG00000215158 | AC138409.2 | 1.99E+00 | 5.42E-05 | 1.93E-04 |
| ENSG00000129993 | CBFA2T3    | 5.03E+00 | 5.48E-05 | 1.95E-04 |
| ENSG00000197093 | GAL3ST4    | 3.71E+00 | 5.49E-05 | 1.95E-04 |
| ENSG00000105877 | DNAH11     | 1.80E+00 | 5.65E-05 | 2.00E-04 |
| ENSG00000172159 | FRMD3      | 2.28E+00 | 5.67E-05 | 2.01E-04 |
| ENSG00000149295 | DRD2       | 3.42E+00 | 5.69E-05 | 2.02E-04 |
| ENSG00000147437 | GNRH1      | 1.76E+00 | 5.70E-05 | 2.02E-04 |
| ENSG00000139117 | CPNE8      | 1.29E+00 | 5.73E-05 | 2.03E-04 |
| ENSG00000164120 | HPGD       | 3.94E+00 | 5.76E-05 | 2.04E-04 |
| ENSG00000162878 | PKDCC      | 1.83E+00 | 5.77E-05 | 2.04E-04 |
| ENSG00000070388 | FGF22      | 4.19E+00 | 5.79E-05 | 2.05E-04 |
| ENSG00000168646 | AXIN2      | 1.72E+00 | 5.86E-05 | 2.07E-04 |
| ENSG00000170827 | CELP       | 5.48E+00 | 5.92E-05 | 2.09E-04 |
| ENSG00000171303 | KCNK3      | 3.04E+00 | 5.92E-05 | 2.09E-04 |
| ENSG00000286511 | Z95118.2   | 3.57E+00 | 5.99E-05 | 2.12E-04 |
| ENSG00000108405 | P2RX1      | 4.98E+00 | 6.09E-05 | 2.15E-04 |
| ENSG00000260401 | AP002761.4 | 5.33E+00 | 6.09E-05 | 2.15E-04 |
| ENSG00000172361 | CFAP53     | 3.97E+00 | 6.24E-05 | 2.20E-04 |
| ENSG00000162896 | PIGR       | 4.91E+00 | 6.26E-05 | 2.20E-04 |
| ENSG00000109220 | CHIC2      | 1.02E+00 | 6.27E-05 | 2.20E-04 |
| ENSG00000160949 | TONSL      | 1.09E+00 | 6.30E-05 | 2.22E-04 |
| ENSG00000118402 | ELOVL4     | 1.24E+00 | 6.32E-05 | 2.22E-04 |
| ENSG00000102125 | TAZ        | 1.29E+00 | 6.32E-05 | 2.22E-04 |
| ENSG00000141179 | PCTP       | 1.12E+00 | 6.49E-05 | 2.28E-04 |
| ENSG00000122735 | DNAI1      | 5.25E+00 | 6.55E-05 | 2.30E-04 |
| ENSG00000060566 | CREB3L3    | 5.03E+00 | 6.57E-05 | 2.30E-04 |
| ENSG00000100285 | NEFH       | 3.91E+00 | 6.59E-05 | 2.31E-04 |
| ENSG00000133794 | ARNTL      | 1.15E+00 | 6.60E-05 | 2.31E-04 |
| ENSG00000172794 | RAB37      | 5.16E+00 | 6.68E-05 | 2.34E-04 |
| ENSG00000134917 | ADAMTS8    | 4.92E+00 | 6.79E-05 | 2.38E-04 |
| ENSG00000107968 | MAP3K8     | 2.07E+00 | 6.81E-05 | 2.38E-04 |
| ENSG00000124391 | IL17C      | 5.01E+00 | 6.89E-05 | 2.41E-04 |
| ENSG00000138136 | LBX1       | 5.20E+00 | 6.91E-05 | 2.42E-04 |
| ENSG00000113504 | SLC12A7    | 1.04E+00 | 6.96E-05 | 2.43E-04 |
| ENSG00000130182 | ZSCAN10    | 4.94E+00 | 6.97E-05 | 2.44E-04 |
| ENSG00000125753 | VASP       | 1.01E+00 | 7.03E-05 | 2.45E-04 |
| ENSG00000121797 | CCRL2      | 3.88E+00 | 7.06E-05 | 2.47E-04 |
| ENSG00000259790 | ANP32BP1   | 4.88E+00 | 7.16E-05 | 2.50E-04 |
| ENSG00000173137 | ADCK5      | 1.12E+00 | 7.19E-05 | 2.51E-04 |
| ENSG00000167103 | PIP5KL1    | 2.44E+00 | 7.27E-05 | 2.53E-04 |

|                 |             |          |          |          |
|-----------------|-------------|----------|----------|----------|
| ENSG00000259847 | LINC02126   | 3.09E+00 | 7.27E-05 | 2.53E-04 |
| ENSG00000141837 | CACNA1A     | 1.69E+00 | 7.28E-05 | 2.54E-04 |
| ENSG00000214796 | AC098934.1  | 1.93E+00 | 7.32E-05 | 2.55E-04 |
| ENSG00000146005 | PSD2        | 4.56E+00 | 7.34E-05 | 2.56E-04 |
| ENSG00000184163 | C1QTNF12    | 2.41E+00 | 7.48E-05 | 2.60E-04 |
| ENSG00000173320 | STOX2       | 2.97E+00 | 7.52E-05 | 2.61E-04 |
| ENSG00000228451 | SDAD1P1     | 1.66E+00 | 7.55E-05 | 2.62E-04 |
| ENSG00000180861 | LINC01559   | 5.40E+00 | 7.82E-05 | 2.71E-04 |
| ENSG00000108439 | PNPO        | 1.18E+00 | 7.83E-05 | 2.72E-04 |
| ENSG00000215089 | KRT18P11    | 1.54E+00 | 7.85E-05 | 2.72E-04 |
| ENSG00000205323 | SARNP       | 1.78E+00 | 7.85E-05 | 2.72E-04 |
| ENSG00000166405 | RIC3        | 5.06E+00 | 7.86E-05 | 2.73E-04 |
| ENSG00000085465 | OVGP1       | 3.80E+00 | 7.87E-05 | 2.73E-04 |
| ENSG00000124664 | SPDEF       | 2.87E+00 | 7.97E-05 | 2.76E-04 |
| ENSG00000237149 | ZNF503-AS2  | 1.62E+00 | 7.98E-05 | 2.77E-04 |
| ENSG00000130829 | DUSP9       | 1.22E+00 | 8.11E-05 | 2.81E-04 |
| ENSG00000085514 | PILRA       | 4.30E+00 | 8.19E-05 | 2.83E-04 |
| ENSG00000174672 | BRSK2       | 1.23E+00 | 8.22E-05 | 2.84E-04 |
| ENSG00000155918 | RAET1L      | 3.55E+00 | 8.27E-05 | 2.86E-04 |
| ENSG00000184809 | B3GALT5-AS1 | 5.14E+00 | 8.34E-05 | 2.88E-04 |
| ENSG00000184988 | TMEM106A    | 1.62E+00 | 8.36E-05 | 2.89E-04 |
| ENSG00000223511 | AL683807.1  | 3.26E+00 | 8.38E-05 | 2.89E-04 |
| ENSG00000182327 | GLTPD2      | 4.19E+00 | 8.44E-05 | 2.91E-04 |
| ENSG00000160336 | ZNF761      | 1.53E+00 | 8.62E-05 | 2.97E-04 |
| ENSG00000107859 | PITX3       | 4.60E+00 | 8.62E-05 | 2.97E-04 |
| ENSG00000169689 | CENPX       | 1.15E+00 | 8.62E-05 | 2.97E-04 |
| ENSG00000188735 | TMEM120B    | 1.04E+00 | 8.66E-05 | 2.98E-04 |
| ENSG00000177465 | ACOT4       | 2.12E+00 | 8.70E-05 | 3.00E-04 |
| ENSG00000231389 | HLA-DPA1    | 1.81E+00 | 9.06E-05 | 3.12E-04 |
| ENSG00000280011 | AL031595.2  | 4.76E+00 | 9.13E-05 | 3.14E-04 |
| ENSG00000130711 | PRDM12      | 4.62E+00 | 9.18E-05 | 3.16E-04 |
| ENSG00000120306 | CYSTM1      | 1.14E+00 | 9.20E-05 | 3.16E-04 |
| ENSG00000253210 | AC040970.1  | 3.38E+00 | 9.27E-05 | 3.18E-04 |
| ENSG00000250041 | AC069360.1  | 3.85E+00 | 9.28E-05 | 3.19E-04 |
| ENSG00000011638 | TMEM159     | 1.35E+00 | 9.36E-05 | 3.21E-04 |
| ENSG00000139890 | REM2        | 3.09E+00 | 9.36E-05 | 3.21E-04 |
| ENSG00000213588 | ZBTB9       | 1.06E+00 | 9.39E-05 | 3.22E-04 |
| ENSG00000138642 | HERC6       | 1.41E+00 | 9.40E-05 | 3.23E-04 |
| ENSG00000225969 | ABHD11-AS1  | 4.92E+00 | 9.45E-05 | 3.24E-04 |
| ENSG00000169509 | CRCT1       | 5.26E+00 | 9.85E-05 | 3.37E-04 |
| ENSG00000226721 | EEF1DP2     | 1.86E+00 | 9.98E-05 | 3.41E-04 |
| ENSG00000196814 | MVB12B      | 1.62E+00 | 9.99E-05 | 3.41E-04 |
| ENSG00000088002 | SULT2B1     | 4.15E+00 | 1.01E-04 | 3.46E-04 |
| ENSG00000178852 | EFCAB13     | 2.78E+00 | 1.03E-04 | 3.51E-04 |
| ENSG00000152779 | SLC16A12    | 2.82E+00 | 1.03E-04 | 3.52E-04 |

|                 |             |          |          |          |
|-----------------|-------------|----------|----------|----------|
| ENSG00000258839 | MC1R        | 1.83E+00 | 1.03E-04 | 3.52E-04 |
| ENSG00000272994 | AC012360.3  | 1.22E+00 | 1.05E-04 | 3.58E-04 |
| ENSG00000187122 | SLIT1       | 4.84E+00 | 1.05E-04 | 3.58E-04 |
| ENSG00000111913 | RIPOR2      | 2.46E+00 | 1.06E-04 | 3.60E-04 |
| ENSG00000223861 | AL365436.1  | 2.01E+00 | 1.07E-04 | 3.63E-04 |
| ENSG00000160161 | CILP2       | 1.36E+00 | 1.07E-04 | 3.65E-04 |
| ENSG00000168703 | WFDC12      | 5.75E+00 | 1.08E-04 | 3.65E-04 |
| ENSG00000224870 | MRPL20-AS1  | 1.57E+00 | 1.09E-04 | 3.70E-04 |
| ENSG00000258616 | LINC02303   | 3.02E+00 | 1.10E-04 | 3.73E-04 |
| ENSG00000236751 | LINC01186   | 2.50E+00 | 1.10E-04 | 3.73E-04 |
| ENSG00000142961 | MOB3C       | 2.01E+00 | 1.10E-04 | 3.74E-04 |
| ENSG00000086848 | ALG9        | 1.19E+00 | 1.11E-04 | 3.76E-04 |
| ENSG00000129654 | FOXJ1       | 2.97E+00 | 1.13E-04 | 3.82E-04 |
| ENSG00000256940 | PPP1R14B-AS | 1.97E+00 | 1.13E-04 | 3.82E-04 |
| ENSG00000257108 | NHLRC4      | 4.31E+00 | 1.13E-04 | 3.83E-04 |
| ENSG00000188613 | NANOS1      | 1.80E+00 | 1.13E-04 | 3.83E-04 |
| ENSG00000176945 | MUC20       | 3.54E+00 | 1.15E-04 | 3.87E-04 |
| ENSG00000163885 | CFAP100     | 4.96E+00 | 1.16E-04 | 3.92E-04 |
| ENSG00000251455 | AC092611.1  | 4.85E+00 | 1.17E-04 | 3.94E-04 |
| ENSG00000215154 | AC141586.1  | 1.46E+00 | 1.20E-04 | 4.05E-04 |
| ENSG00000263201 | DPEP2NB     | 4.98E+00 | 1.21E-04 | 4.09E-04 |
| ENSG00000205903 | ZNF316      | 1.08E+00 | 1.24E-04 | 4.16E-04 |
| ENSG00000267655 | AC125437.1  | 3.01E+00 | 1.25E-04 | 4.19E-04 |
| ENSG00000095713 | CRTAC1      | 4.29E+00 | 1.25E-04 | 4.21E-04 |
| ENSG00000159714 | ZDHHC1      | 5.14E+00 | 1.25E-04 | 4.21E-04 |
| ENSG00000161944 | ASGR2       | 5.21E+00 | 1.28E-04 | 4.29E-04 |
| ENSG00000273330 | CYP4F36P    | 4.93E+00 | 1.31E-04 | 4.38E-04 |
| ENSG00000260231 | KDM7A-DT    | 1.87E+00 | 1.32E-04 | 4.43E-04 |
| ENSG00000197857 | ZNF44       | 1.33E+00 | 1.34E-04 | 4.47E-04 |
| ENSG00000136059 | VILL        | 5.56E+00 | 1.35E-04 | 4.51E-04 |
| ENSG00000259158 | ADAM20P1    | 3.77E+00 | 1.36E-04 | 4.54E-04 |
| ENSG00000235823 | OLMALINC    | 1.10E+00 | 1.37E-04 | 4.57E-04 |
| ENSG00000162510 | MATN1       | 3.28E+00 | 1.38E-04 | 4.62E-04 |
| ENSG00000001460 | STPG1       | 1.55E+00 | 1.39E-04 | 4.63E-04 |
| ENSG00000273812 | BX640514.2  | 3.89E+00 | 1.41E-04 | 4.72E-04 |
| ENSG00000163792 | TCF23       | 4.95E+00 | 1.42E-04 | 4.74E-04 |
| ENSG00000138735 | PDE5A       | 1.76E+00 | 1.43E-04 | 4.75E-04 |
| ENSG00000109667 | SLC2A9      | 3.34E+00 | 1.47E-04 | 4.88E-04 |
| ENSG00000162641 | AKNAD1      | 3.27E+00 | 1.47E-04 | 4.90E-04 |
| ENSG00000111837 | MAK         | 2.11E+00 | 1.48E-04 | 4.92E-04 |
| ENSG00000204936 | CD177       | 3.71E+00 | 1.48E-04 | 4.93E-04 |
| ENSG00000198221 | AFDN-DT     | 5.36E+00 | 1.48E-04 | 4.93E-04 |
| ENSG00000158125 | XDH         | 2.45E+00 | 1.49E-04 | 4.93E-04 |
| ENSG00000188997 | KCTD21      | 1.57E+00 | 1.49E-04 | 4.94E-04 |
| ENSG00000187045 | TMPRSS6     | 5.30E+00 | 1.49E-04 | 4.95E-04 |



|                 |              |          |          |          |
|-----------------|--------------|----------|----------|----------|
| ENSG00000273230 | AC102953.2   | 1.40E+00 | 1.50E-04 | 4.98E-04 |
| ENSG00000227252 | AC012063.1   | 2.89E+00 | 1.51E-04 | 4.99E-04 |
| ENSG00000287763 | AC068279.2   | 2.94E+00 | 1.51E-04 | 5.02E-04 |
| ENSG00000176428 | VPS37D       | 1.52E+00 | 1.53E-04 | 5.07E-04 |
| ENSG00000205625 | AL591499.1   | 4.77E+00 | 1.54E-04 | 5.08E-04 |
| ENSG00000157570 | TSPAN18      | 1.34E+00 | 1.54E-04 | 5.10E-04 |
| ENSG00000205930 | C21orf62-AS1 | 3.49E+00 | 1.54E-04 | 5.10E-04 |
| ENSG00000181284 | TMEM102      | 3.05E+00 | 1.56E-04 | 5.15E-04 |
| ENSG00000149922 | TBX6         | 4.82E+00 | 1.56E-04 | 5.16E-04 |
| ENSG00000260302 | AP005482.1   | 4.42E+00 | 1.58E-04 | 5.21E-04 |
| ENSG00000173338 | KCNK7        | 5.33E+00 | 1.60E-04 | 5.27E-04 |
| ENSG00000130755 | GMFG         | 4.31E+00 | 1.62E-04 | 5.34E-04 |
| ENSG00000224153 | LINC02054    | 4.72E+00 | 1.62E-04 | 5.35E-04 |
| ENSG00000185668 | POU3F1       | 1.97E+00 | 1.63E-04 | 5.35E-04 |
| ENSG00000130540 | SULT4A1      | 3.27E+00 | 1.63E-04 | 5.38E-04 |
| ENSG00000144908 | ALDH1L1      | 1.94E+00 | 1.65E-04 | 5.44E-04 |
| ENSG00000150907 | FOXO1        | 1.52E+00 | 1.65E-04 | 5.44E-04 |
| ENSG00000140795 | MYLK3        | 4.75E+00 | 1.66E-04 | 5.45E-04 |
| ENSG00000186862 | PDZD7        | 3.50E+00 | 1.67E-04 | 5.49E-04 |
| ENSG00000155367 | PPM1J        | 3.56E+00 | 1.67E-04 | 5.49E-04 |
| ENSG00000123453 | SARDH        | 1.85E+00 | 1.68E-04 | 5.51E-04 |
| ENSG00000279692 | AC110285.6   | 1.55E+00 | 1.69E-04 | 5.54E-04 |
| ENSG00000160678 | S100A1       | 3.59E+00 | 1.71E-04 | 5.61E-04 |
| ENSG00000269068 | AC009955.4   | 5.25E+00 | 1.71E-04 | 5.62E-04 |
| ENSG00000229180 | AC006001.3   | 1.01E+00 | 1.73E-04 | 5.66E-04 |
| ENSG00000118960 | HS1BP3       | 1.41E+00 | 1.73E-04 | 5.68E-04 |
| ENSG00000244694 | PTCHD4       | 2.31E+00 | 1.74E-04 | 5.71E-04 |
| ENSG00000105613 | MAST1        | 1.98E+00 | 1.76E-04 | 5.76E-04 |
| ENSG00000105404 | RABAC1       | 1.05E+00 | 1.77E-04 | 5.78E-04 |
| ENSG00000119915 | ELOVL3       | 4.70E+00 | 1.77E-04 | 5.79E-04 |
| ENSG00000145794 | MEGF10       | 1.05E+00 | 1.78E-04 | 5.83E-04 |
| ENSG00000167632 | TRAPPC9      | 1.27E+00 | 1.79E-04 | 5.83E-04 |
| ENSG00000264230 | ANXA8L1      | 4.27E+00 | 1.79E-04 | 5.83E-04 |
| ENSG00000176244 | ACBD7        | 1.12E+00 | 1.79E-04 | 5.83E-04 |
| ENSG00000257178 | AC103702.1   | 3.45E+00 | 1.79E-04 | 5.85E-04 |
| ENSG00000173110 | HSPA6        | 2.33E+00 | 1.83E-04 | 5.96E-04 |
| ENSG00000025434 | NR1H3        | 1.40E+00 | 1.84E-04 | 6.01E-04 |
| ENSG00000163497 | FEV          | 4.28E+00 | 1.85E-04 | 6.01E-04 |
| ENSG00000278276 | AL110115.2   | 4.83E+00 | 1.85E-04 | 6.04E-04 |
| ENSG00000122678 | POLM         | 1.18E+00 | 1.89E-04 | 6.15E-04 |
| ENSG00000149489 | ROM1         | 1.98E+00 | 1.90E-04 | 6.18E-04 |
| ENSG00000171680 | PLEKHG5      | 2.10E+00 | 1.92E-04 | 6.24E-04 |
| ENSG00000171798 | KNDC1        | 3.69E+00 | 1.95E-04 | 6.33E-04 |
| ENSG00000128482 | RNF112       | 4.72E+00 | 1.97E-04 | 6.40E-04 |
| ENSG00000120903 | CHRNA2       | 5.21E+00 | 1.97E-04 | 6.40E-04 |

|                 |             |          |          |          |
|-----------------|-------------|----------|----------|----------|
| ENSG00000142611 | PRDM16      | 2.37E+00 | 1.97E-04 | 6.40E-04 |
| ENSG00000184056 | VPS33B      | 1.39E+00 | 1.98E-04 | 6.42E-04 |
| ENSG00000283235 | AC139493.2  | 4.08E+00 | 1.98E-04 | 6.44E-04 |
| ENSG00000100399 | CHADL       | 4.49E+00 | 1.99E-04 | 6.47E-04 |
| ENSG00000162747 | FCGR3B      | 4.86E+00 | 1.99E-04 | 6.47E-04 |
| ENSG00000214049 | UCA1        | 4.69E+00 | 2.00E-04 | 6.48E-04 |
| ENSG00000114547 | ROPN1B      | 2.93E+00 | 2.00E-04 | 6.49E-04 |
| ENSG00000114698 | PLSCR4      | 1.99E+00 | 2.01E-04 | 6.50E-04 |
| ENSG00000135473 | PAN2        | 1.08E+00 | 2.04E-04 | 6.62E-04 |
| ENSG00000115590 | IL1R2       | 4.21E+00 | 2.05E-04 | 6.64E-04 |
| ENSG00000162241 | SLC25A45    | 2.78E+00 | 2.07E-04 | 6.70E-04 |
| ENSG00000196912 | ANKRD36B    | 1.25E+00 | 2.12E-04 | 6.85E-04 |
| ENSG00000261600 | AC233266.2  | 2.41E+00 | 2.12E-04 | 6.85E-04 |
| ENSG00000176809 | LRRC37A3    | 2.37E+00 | 2.13E-04 | 6.89E-04 |
| ENSG00000137460 | FHDC1       | 1.06E+00 | 2.14E-04 | 6.90E-04 |
| ENSG00000104059 | FAM189A1    | 2.87E+00 | 2.14E-04 | 6.92E-04 |
| ENSG00000161544 | CYGB        | 2.41E+00 | 2.14E-04 | 6.92E-04 |
| ENSG00000230424 | EMC1-AS1    | 4.86E+00 | 2.16E-04 | 6.97E-04 |
| ENSG00000148408 | CACNA1B     | 4.80E+00 | 2.18E-04 | 7.02E-04 |
| ENSG00000233554 | B4GALT1-AS1 | 3.54E+00 | 2.20E-04 | 7.10E-04 |
| ENSG00000115523 | GNLY        | 5.24E+00 | 2.21E-04 | 7.12E-04 |
| ENSG00000198538 | ZNF28       | 1.02E+00 | 2.22E-04 | 7.13E-04 |
| ENSG00000105737 | GRIK5       | 3.07E+00 | 2.25E-04 | 7.24E-04 |
| ENSG00000131737 | KRT34       | 4.15E+00 | 2.26E-04 | 7.27E-04 |
| ENSG00000174844 | DNAH12      | 4.28E+00 | 2.27E-04 | 7.30E-04 |
| ENSG00000197561 | ELANE       | 4.87E+00 | 2.29E-04 | 7.35E-04 |
| ENSG00000073861 | TBX21       | 4.37E+00 | 2.29E-04 | 7.35E-04 |
| ENSG00000003400 | CASP10      | 3.71E+00 | 2.32E-04 | 7.44E-04 |
| ENSG00000074527 | NTN4        | 1.47E+00 | 2.32E-04 | 7.44E-04 |
| ENSG00000119899 | SLC17A5     | 1.37E+00 | 2.33E-04 | 7.47E-04 |
| ENSG00000074855 | ANO8        | 1.64E+00 | 2.35E-04 | 7.54E-04 |
| ENSG00000174945 | AMZ1        | 2.65E+00 | 2.36E-04 | 7.57E-04 |
| ENSG00000154342 | WNT3A       | 4.47E+00 | 2.39E-04 | 7.66E-04 |
| ENSG00000203727 | SAMD5       | 5.17E+00 | 2.39E-04 | 7.66E-04 |
| ENSG00000187135 | VSTM2B      | 4.79E+00 | 2.42E-04 | 7.74E-04 |
| ENSG00000188508 | KRTDAP      | 4.80E+00 | 2.42E-04 | 7.76E-04 |
| ENSG00000099840 | IZUMO4      | 3.18E+00 | 2.43E-04 | 7.79E-04 |
| ENSG00000203999 | LINC01270   | 1.65E+00 | 2.45E-04 | 7.83E-04 |
| ENSG00000163959 | SLC51A      | 4.39E+00 | 2.50E-04 | 7.99E-04 |
| ENSG00000185189 | NRBP2       | 1.97E+00 | 2.50E-04 | 7.99E-04 |
| ENSG00000111319 | SCNN1A      | 4.26E+00 | 2.51E-04 | 8.04E-04 |
| ENSG00000185339 | TCN2        | 2.15E+00 | 2.52E-04 | 8.05E-04 |
| ENSG00000167984 | NLRC3       | 4.35E+00 | 2.52E-04 | 8.05E-04 |
| ENSG00000204611 | ZNF616      | 1.11E+00 | 2.53E-04 | 8.08E-04 |
| ENSG00000166126 | AMN         | 4.98E+00 | 2.55E-04 | 8.14E-04 |

|                 |            |          |          |          |
|-----------------|------------|----------|----------|----------|
| ENSG00000056487 | PHF21B     | 2.86E+00 | 2.56E-04 | 8.17E-04 |
| ENSG00000221821 | C6orf226   | 1.30E+00 | 2.56E-04 | 8.17E-04 |
| ENSG00000184381 | PLA2G6     | 3.26E+00 | 2.67E-04 | 8.50E-04 |
| ENSG00000122367 | LDB3       | 2.81E+00 | 2.68E-04 | 8.53E-04 |
| ENSG00000134757 | DSG3       | 4.46E+00 | 2.69E-04 | 8.55E-04 |
| ENSG00000184508 | HDDC3      | 1.25E+00 | 2.69E-04 | 8.55E-04 |
| ENSG00000254615 | AC027031.2 | 1.63E+00 | 2.72E-04 | 8.64E-04 |
| ENSG00000230453 | ANKRD18B   | 1.02E+00 | 2.72E-04 | 8.64E-04 |
| ENSG00000112902 | SEMA5A     | 1.11E+00 | 2.73E-04 | 8.67E-04 |
| ENSG00000089116 | LHX5       | 4.02E+00 | 2.75E-04 | 8.73E-04 |
| ENSG00000149557 | FEZ1       | 1.14E+00 | 2.80E-04 | 8.89E-04 |
| ENSG00000136457 | CHAD       | 4.97E+00 | 2.81E-04 | 8.92E-04 |
| ENSG00000197165 | SULT1A2    | 5.04E+00 | 2.86E-04 | 9.07E-04 |
| ENSG00000254614 | AP003068.2 | 1.93E+00 | 2.88E-04 | 9.13E-04 |
| ENSG00000243742 | RPLP0P2    | 1.56E+00 | 2.96E-04 | 9.36E-04 |
| ENSG00000101194 | SLC17A9    | 4.50E+00 | 2.99E-04 | 9.43E-04 |
| ENSG00000136999 | CCN3       | 2.06E+00 | 2.99E-04 | 9.43E-04 |
| ENSG00000186684 | CYP27C1    | 1.10E+00 | 2.99E-04 | 9.44E-04 |
| ENSG00000064655 | EYA2       | 1.95E+00 | 3.00E-04 | 9.48E-04 |
| ENSG00000173641 | HSPB7      | 5.20E+00 | 3.01E-04 | 9.48E-04 |
| ENSG00000260750 | AC092720.1 | 5.01E+00 | 3.06E-04 | 9.62E-04 |
| ENSG00000185499 | MUC1       | 1.88E+00 | 3.09E-04 | 9.71E-04 |
| ENSG00000197822 | OCLN       | 3.18E+00 | 3.19E-04 | 1.00E-03 |
| ENSG00000186868 | MAPT       | 1.85E+00 | 3.19E-04 | 1.00E-03 |
| ENSG00000260877 | AP005233.2 | 3.41E+00 | 3.19E-04 | 1.00E-03 |
| ENSG00000187123 | LYPD6      | 2.33E+00 | 3.22E-04 | 1.01E-03 |
| ENSG00000272092 | AC087623.2 | 4.10E+00 | 3.24E-04 | 1.02E-03 |
| ENSG00000132825 | PPP1R3D    | 1.05E+00 | 3.28E-04 | 1.03E-03 |
| ENSG00000160255 | ITGB2      | 3.43E+00 | 3.34E-04 | 1.05E-03 |
| ENSG00000253802 | SIRLNT     | 1.24E+00 | 3.37E-04 | 1.06E-03 |
| ENSG00000183145 | RIPPLY3    | 1.53E+00 | 3.40E-04 | 1.06E-03 |
| ENSG00000179766 | ATP8B5P    | 1.36E+00 | 3.40E-04 | 1.06E-03 |
| ENSG00000272696 | AL359091.4 | 3.93E+00 | 3.41E-04 | 1.06E-03 |
| ENSG00000154265 | ABCA5      | 1.09E+00 | 3.44E-04 | 1.07E-03 |
| ENSG00000179954 | SSC5D      | 2.47E+00 | 3.45E-04 | 1.08E-03 |
| ENSG00000144596 | GRIP2      | 3.20E+00 | 3.45E-04 | 1.08E-03 |
| ENSG00000149564 | ESAM       | 1.98E+00 | 3.46E-04 | 1.08E-03 |
| ENSG00000239247 | RN7SL589P  | 5.18E+00 | 3.61E-04 | 1.12E-03 |
| ENSG00000269466 | H3.Y       | 5.17E+00 | 3.61E-04 | 1.12E-03 |
| ENSG00000268460 | AC006262.1 | 4.46E+00 | 3.65E-04 | 1.13E-03 |
| ENSG00000179859 | RNF227     | 2.21E+00 | 3.68E-04 | 1.14E-03 |
| ENSG00000168679 | SLC16A4    | 2.85E+00 | 3.74E-04 | 1.16E-03 |
| ENSG00000269186 | LINC01082  | 4.78E+00 | 3.76E-04 | 1.17E-03 |
| ENSG00000218018 | AL109955.1 | 5.44E+00 | 3.77E-04 | 1.17E-03 |
| ENSG00000198169 | ZNF251     | 1.21E+00 | 3.79E-04 | 1.17E-03 |

|                 |            |          |          |          |
|-----------------|------------|----------|----------|----------|
| ENSG00000151690 | MFSD6      | 1.55E+00 | 3.79E-04 | 1.17E-03 |
| ENSG00000079393 | DUSP13     | 4.30E+00 | 3.80E-04 | 1.18E-03 |
| ENSG00000186814 | ZSCAN30    | 1.10E+00 | 3.84E-04 | 1.19E-03 |
| ENSG00000072133 | RPS6KA6    | 1.75E+00 | 3.86E-04 | 1.19E-03 |
| ENSG00000173599 | PC         | 1.41E+00 | 3.92E-04 | 1.21E-03 |
| ENSG00000161921 | CXCL16     | 1.39E+00 | 3.94E-04 | 1.22E-03 |
| ENSG00000125457 | MIF4GD     | 1.51E+00 | 3.96E-04 | 1.22E-03 |
| ENSG00000287413 | AL449363.2 | 4.66E+00 | 3.97E-04 | 1.22E-03 |
| ENSG00000198346 | ZNF813     | 1.30E+00 | 3.97E-04 | 1.23E-03 |
| ENSG00000267475 | AC008736.1 | 2.59E+00 | 4.09E-04 | 1.26E-03 |
| ENSG00000150556 | LYPD6B     | 3.93E+00 | 4.09E-04 | 1.26E-03 |
| ENSG00000125084 | WNT1       | 5.03E+00 | 4.10E-04 | 1.26E-03 |
| ENSG00000061987 | MON2       | 1.12E+00 | 4.14E-04 | 1.27E-03 |
| ENSG00000255363 | LINC02757  | 5.15E+00 | 4.14E-04 | 1.27E-03 |
| ENSG00000227748 | AL138916.1 | 4.68E+00 | 4.14E-04 | 1.27E-03 |
| ENSG00000274373 | AC148476.1 | 5.28E+00 | 4.19E-04 | 1.29E-03 |
| ENSG00000161912 | ADCY10P1   | 1.77E+00 | 4.20E-04 | 1.29E-03 |
| ENSG00000005961 | ITGA2B     | 1.45E+00 | 4.22E-04 | 1.30E-03 |
| ENSG00000261801 | LOXL1-AS1  | 1.38E+00 | 4.28E-04 | 1.31E-03 |
| ENSG00000047617 | ANO2       | 4.10E+00 | 4.29E-04 | 1.32E-03 |
| ENSG00000287677 | AC025839.1 | 4.51E+00 | 4.33E-04 | 1.33E-03 |
| ENSG00000144119 | C1QL2      | 4.58E+00 | 4.33E-04 | 1.33E-03 |
| ENSG00000171695 | LKAAEAR1   | 2.04E+00 | 4.34E-04 | 1.33E-03 |
| ENSG00000072182 | ASIC4      | 4.56E+00 | 4.34E-04 | 1.33E-03 |
| ENSG00000183770 | FOXL2      | 2.55E+00 | 4.40E-04 | 1.35E-03 |
| ENSG00000105357 | MYH14      | 4.67E+00 | 4.45E-04 | 1.36E-03 |
| ENSG00000157240 | FZD1       | 1.19E+00 | 4.48E-04 | 1.37E-03 |
| ENSG00000176533 | GNG7       | 1.48E+00 | 4.52E-04 | 1.38E-03 |
| ENSG00000283050 | GTF2IP12   | 1.92E+00 | 4.52E-04 | 1.38E-03 |
| ENSG00000153789 | FAM92B     | 3.15E+00 | 4.54E-04 | 1.39E-03 |
| ENSG00000122254 | HS3ST2     | 4.83E+00 | 4.54E-04 | 1.39E-03 |
| ENSG00000276170 | AC244153.1 | 2.86E+00 | 4.64E-04 | 1.42E-03 |
| ENSG00000110042 | DTX4       | 1.62E+00 | 4.67E-04 | 1.42E-03 |
| ENSG00000167641 | PPP1R14A   | 3.79E+00 | 4.67E-04 | 1.42E-03 |
| ENSG00000229585 | RPL21P44   | 2.18E+00 | 4.68E-04 | 1.43E-03 |
| ENSG00000142632 | ARHGEF19   | 1.01E+00 | 4.71E-04 | 1.43E-03 |
| ENSG00000224079 | AC091729.1 | 5.01E+00 | 4.71E-04 | 1.43E-03 |
| ENSG00000162390 | ACOT11     | 2.87E+00 | 4.72E-04 | 1.44E-03 |
| ENSG00000164764 | SBSPON     | 2.95E+00 | 4.75E-04 | 1.45E-03 |
| ENSG00000186409 | CCDC30     | 2.98E+00 | 4.77E-04 | 1.45E-03 |
| ENSG00000274290 | HIST1H2BE  | 4.19E+00 | 4.81E-04 | 1.46E-03 |
| ENSG00000119457 | SLC46A2    | 5.18E+00 | 4.89E-04 | 1.48E-03 |
| ENSG00000103811 | CTSH       | 1.65E+00 | 4.90E-04 | 1.49E-03 |
| ENSG00000107077 | KDM4C      | 1.11E+00 | 4.92E-04 | 1.49E-03 |
| ENSG00000203722 | RAET1G     | 2.50E+00 | 4.93E-04 | 1.50E-03 |

|                 |             |          |          |          |
|-----------------|-------------|----------|----------|----------|
| ENSG00000183682 | BMP8A       | 3.49E+00 | 5.01E-04 | 1.52E-03 |
| ENSG00000177181 | RIMKLA      | 2.52E+00 | 5.02E-04 | 1.52E-03 |
| ENSG00000182676 | PPP1R27     | 3.53E+00 | 5.03E-04 | 1.52E-03 |
| ENSG00000169548 | ZNF280A     | 4.98E+00 | 5.04E-04 | 1.53E-03 |
| ENSG00000158270 | COLEC12     | 1.52E+00 | 5.10E-04 | 1.54E-03 |
| ENSG00000181513 | ACBD4       | 1.93E+00 | 5.11E-04 | 1.54E-03 |
| ENSG00000143382 | ADAMTSL4    | 2.79E+00 | 5.14E-04 | 1.55E-03 |
| ENSG00000160973 | FOXH1       | 4.59E+00 | 5.14E-04 | 1.55E-03 |
| ENSG00000154553 | PDLIM3      | 1.58E+00 | 5.15E-04 | 1.55E-03 |
| ENSG00000286214 | AUXG0100005 | 3.11E+00 | 5.15E-04 | 1.55E-03 |
| ENSG00000164309 | CMYA5       | 3.29E+00 | 5.18E-04 | 1.56E-03 |
| ENSG00000101405 | OXT         | 4.45E+00 | 5.23E-04 | 1.58E-03 |
| ENSG00000054690 | PLEKHH1     | 2.26E+00 | 5.28E-04 | 1.59E-03 |
| ENSG00000057468 | MSH4        | 5.44E+00 | 5.34E-04 | 1.61E-03 |
| ENSG00000273143 | AL355512.1  | 2.04E+00 | 5.34E-04 | 1.61E-03 |
| ENSG00000066230 | SLC9A3      | 4.63E+00 | 5.40E-04 | 1.62E-03 |
| ENSG00000101443 | WFDC2       | 1.84E+00 | 5.41E-04 | 1.62E-03 |
| ENSG00000142484 | TM4SF5      | 5.10E+00 | 5.41E-04 | 1.62E-03 |
| ENSG00000213996 | TM6SF2      | 2.85E+00 | 5.52E-04 | 1.66E-03 |
| ENSG00000197620 | CXorf40A    | 1.28E+00 | 5.54E-04 | 1.66E-03 |
| ENSG00000135709 | KIAA0513    | 1.33E+00 | 5.59E-04 | 1.67E-03 |
| ENSG00000069667 | RORA        | 2.07E+00 | 5.61E-04 | 1.68E-03 |
| ENSG00000172985 | SH3RF3      | 3.73E+00 | 5.62E-04 | 1.68E-03 |
| ENSG00000176438 | SYNE3       | 2.36E+00 | 5.65E-04 | 1.69E-03 |
| ENSG00000118971 | CCND2       | 2.84E+00 | 5.66E-04 | 1.69E-03 |
| ENSG00000188766 | SPRED3      | 2.60E+00 | 5.68E-04 | 1.70E-03 |
| ENSG00000164626 | KCNK5       | 1.95E+00 | 5.71E-04 | 1.71E-03 |
| ENSG00000134245 | WNT2B       | 2.15E+00 | 5.73E-04 | 1.71E-03 |
| ENSG00000131095 | GFAP        | 4.08E+00 | 5.74E-04 | 1.72E-03 |
| ENSG00000166448 | TMEM130     | 3.59E+00 | 5.78E-04 | 1.73E-03 |
| ENSG00000196139 | AKR1C3      | 3.80E+00 | 5.86E-04 | 1.75E-03 |
| ENSG00000167608 | TMC4        | 4.73E+00 | 5.87E-04 | 1.75E-03 |
| ENSG00000053702 | NRIP2       | 4.25E+00 | 5.93E-04 | 1.77E-03 |
| ENSG00000205212 | CCDC144NL   | 5.03E+00 | 5.93E-04 | 1.77E-03 |
| ENSG00000173614 | NMNAT1      | 1.52E+00 | 5.98E-04 | 1.78E-03 |
| ENSG00000252010 | SCARNA5     | 2.19E+00 | 6.03E-04 | 1.79E-03 |
| ENSG00000127220 | ABHD8       | 1.14E+00 | 6.03E-04 | 1.80E-03 |
| ENSG00000196666 | FAM180B     | 4.40E+00 | 6.21E-04 | 1.84E-03 |
| ENSG00000135094 | SDS         | 4.38E+00 | 6.22E-04 | 1.85E-03 |
| ENSG00000165795 | NDRG2       | 1.83E+00 | 6.24E-04 | 1.85E-03 |
| ENSG00000226864 | ATE1-AS1    | 2.11E+00 | 6.25E-04 | 1.86E-03 |
| ENSG00000225756 | DBH-AS1     | 3.69E+00 | 6.28E-04 | 1.86E-03 |
| ENSG00000109618 | SEPSECS     | 1.24E+00 | 6.31E-04 | 1.87E-03 |
| ENSG00000146707 | POMZP3      | 1.21E+00 | 6.34E-04 | 1.88E-03 |
| ENSG00000247271 | ZBED5-AS1   | 1.85E+00 | 6.39E-04 | 1.89E-03 |

|                 |              |          |          |          |
|-----------------|--------------|----------|----------|----------|
| ENSG00000100319 | ZMAT5        | 1.26E+00 | 6.39E-04 | 1.89E-03 |
| ENSG00000225746 | MEG8         | 3.14E+00 | 6.41E-04 | 1.90E-03 |
| ENSG00000170745 | KCNS3        | 4.27E+00 | 6.46E-04 | 1.91E-03 |
| ENSG00000101049 | SGK2         | 4.00E+00 | 6.57E-04 | 1.94E-03 |
| ENSG00000181982 | CCDC149      | 1.58E+00 | 6.61E-04 | 1.96E-03 |
| ENSG00000275413 | AC002553.2   | 3.63E+00 | 6.63E-04 | 1.96E-03 |
| ENSG00000168255 | POLR2J3      | 1.58E+00 | 6.71E-04 | 1.98E-03 |
| ENSG00000273253 | AL022328.4   | 2.04E+00 | 6.72E-04 | 1.98E-03 |
| ENSG00000133943 | DGLUCY       | 1.63E+00 | 6.74E-04 | 1.99E-03 |
| ENSG00000162869 | PPP1R21      | 1.03E+00 | 6.76E-04 | 2.00E-03 |
| ENSG00000249618 | LINC02465    | 5.45E+00 | 6.76E-04 | 2.00E-03 |
| ENSG00000187994 | RINL         | 2.88E+00 | 6.81E-04 | 2.01E-03 |
| ENSG00000260160 | AC011468.1   | 2.21E+00 | 6.85E-04 | 2.02E-03 |
| ENSG00000257557 | PPP1R12A-AS1 | 2.49E+00 | 6.87E-04 | 2.03E-03 |
| ENSG00000185010 | F8           | 2.68E+00 | 6.91E-04 | 2.04E-03 |
| ENSG00000285188 | AC008397.2   | 3.18E+00 | 6.94E-04 | 2.04E-03 |
| ENSG00000272989 | LINC02012    | 4.53E+00 | 6.96E-04 | 2.05E-03 |
| ENSG00000184524 | CEND1        | 4.70E+00 | 6.98E-04 | 2.05E-03 |
| ENSG00000261888 | AC144831.1   | 3.75E+00 | 7.00E-04 | 2.06E-03 |
| ENSG00000279092 | AC025678.3   | 1.72E+00 | 7.03E-04 | 2.07E-03 |
| ENSG00000163082 | SGPP2        | 3.99E+00 | 7.07E-04 | 2.08E-03 |
| ENSG00000168517 | HEXIM2       | 1.12E+00 | 7.14E-04 | 2.10E-03 |
| ENSG00000154065 | ANKRD29      | 2.05E+00 | 7.18E-04 | 2.11E-03 |
| ENSG00000158525 | CPA5         | 5.07E+00 | 7.22E-04 | 2.12E-03 |
| ENSG00000212464 | SNORA12      | 2.40E+00 | 7.25E-04 | 2.13E-03 |
| ENSG00000185640 | KRT79        | 2.58E+00 | 7.34E-04 | 2.15E-03 |
| ENSG00000122852 | SFTPA1       | 4.78E+00 | 7.34E-04 | 2.15E-03 |
| ENSG00000204540 | PSORS1C1     | 3.50E+00 | 7.37E-04 | 2.16E-03 |
| ENSG00000172935 | MRGPRF       | 4.11E+00 | 7.37E-04 | 2.16E-03 |
| ENSG00000234678 | ELF3-AS1     | 3.47E+00 | 7.39E-04 | 2.16E-03 |
| ENSG00000160323 | ADAMTS13     | 2.62E+00 | 7.42E-04 | 2.17E-03 |
| ENSG00000231969 | AC007364.1   | 2.51E+00 | 7.45E-04 | 2.18E-03 |
| ENSG00000273802 | HIST1H2BG    | 1.24E+00 | 7.46E-04 | 2.18E-03 |
| ENSG00000204706 | MAMDC2-AS1   | 4.36E+00 | 7.47E-04 | 2.19E-03 |
| ENSG00000276980 | AC008760.2   | 3.79E+00 | 7.47E-04 | 2.19E-03 |
| ENSG00000286138 | AC010336.8   | 2.81E+00 | 7.54E-04 | 2.20E-03 |
| ENSG00000075340 | ADD2         | 4.02E+00 | 7.57E-04 | 2.21E-03 |
| ENSG00000145861 | C1QTNF2      | 2.35E+00 | 7.65E-04 | 2.23E-03 |
| ENSG00000263011 | AC108134.4   | 4.09E+00 | 7.68E-04 | 2.24E-03 |
| ENSG00000254531 | AP001816.1   | 1.70E+00 | 7.71E-04 | 2.25E-03 |
| ENSG00000272106 | AL691432.2   | 1.73E+00 | 7.79E-04 | 2.27E-03 |
| ENSG00000197587 | DMBX1        | 3.50E+00 | 7.81E-04 | 2.27E-03 |
| ENSG00000211891 | IGHE         | 4.75E+00 | 7.81E-04 | 2.28E-03 |
| ENSG00000241404 | EGFL8        | 2.40E+00 | 7.83E-04 | 2.28E-03 |
| ENSG00000125744 | RTN2         | 1.07E+00 | 7.87E-04 | 2.29E-03 |

|                 |            |          |          |          |
|-----------------|------------|----------|----------|----------|
| ENSG00000166736 | HTR3A      | 4.86E+00 | 7.88E-04 | 2.29E-03 |
| ENSG00000174137 | FAM53A     | 2.20E+00 | 7.88E-04 | 2.29E-03 |
| ENSG00000168484 | SFTPC      | 3.99E+00 | 7.93E-04 | 2.31E-03 |
| ENSG00000157510 | AFAP1L1    | 1.40E+00 | 7.93E-04 | 2.31E-03 |
| ENSG00000174130 | TLR6       | 1.82E+00 | 7.95E-04 | 2.31E-03 |
| ENSG00000167074 | TEF        | 1.81E+00 | 7.96E-04 | 2.31E-03 |
| ENSG00000145708 | CRHBP      | 3.60E+00 | 8.04E-04 | 2.34E-03 |
| ENSG00000130783 | CCDC62     | 4.10E+00 | 8.07E-04 | 2.34E-03 |
| ENSG00000004848 | ARX        | 5.06E+00 | 8.23E-04 | 2.39E-03 |
| ENSG00000254573 | AP004550.1 | 4.95E+00 | 8.25E-04 | 2.39E-03 |
| ENSG00000226328 | NUP50-DT   | 1.56E+00 | 8.29E-04 | 2.40E-03 |
| ENSG00000128242 | GAL3ST1    | 4.45E+00 | 8.33E-04 | 2.41E-03 |
| ENSG00000170412 | GPRC5C     | 1.01E+00 | 8.33E-04 | 2.41E-03 |
| ENSG00000137880 | GCHFR      | 1.24E+00 | 8.35E-04 | 2.42E-03 |
| ENSG00000197776 | KLHDC1     | 4.30E+00 | 8.37E-04 | 2.42E-03 |
| ENSG00000214922 | HLA-F-AS1  | 1.65E+00 | 8.39E-04 | 2.43E-03 |
| ENSG00000176868 | AL358781.1 | 4.88E+00 | 8.41E-04 | 2.43E-03 |
| ENSG00000176406 | RIMS2      | 1.95E+00 | 8.42E-04 | 2.43E-03 |
| ENSG00000104967 | NOVA2      | 3.11E+00 | 8.47E-04 | 2.45E-03 |
| ENSG00000275719 | AC008622.2 | 3.77E+00 | 8.55E-04 | 2.47E-03 |
| ENSG00000197903 | HIST1H2BK  | 1.27E+00 | 8.60E-04 | 2.48E-03 |
| ENSG00000146122 | DAAM2      | 3.47E+00 | 8.69E-04 | 2.51E-03 |
| ENSG00000182885 | ADGRG3     | 2.88E+00 | 8.71E-04 | 2.51E-03 |
| ENSG00000010327 | STAB1      | 4.88E+00 | 8.73E-04 | 2.52E-03 |
| ENSG00000176678 | FOXL1      | 2.45E+00 | 8.74E-04 | 2.52E-03 |
| ENSG00000112367 | FIG4       | 1.37E+00 | 8.77E-04 | 2.53E-03 |
| ENSG00000234580 | AL356157.1 | 4.80E+00 | 8.79E-04 | 2.53E-03 |
| ENSG00000258602 | LINC01629  | 2.36E+00 | 8.82E-04 | 2.54E-03 |
| ENSG00000273084 | AC092171.5 | 2.90E+00 | 8.96E-04 | 2.58E-03 |
| ENSG00000102032 | RENBP      | 4.95E+00 | 8.99E-04 | 2.58E-03 |
| ENSG00000138411 | HECW2      | 2.35E+00 | 8.99E-04 | 2.58E-03 |
| ENSG00000114656 | KIAA1257   | 5.44E+00 | 9.02E-04 | 2.59E-03 |
| ENSG00000237575 | PYY2       | 3.59E+00 | 9.05E-04 | 2.60E-03 |
| ENSG00000260288 | AC019294.2 | 4.24E+00 | 9.06E-04 | 2.60E-03 |
| ENSG00000124194 | GDAP1L1    | 2.61E+00 | 9.15E-04 | 2.63E-03 |
| ENSG00000143772 | ITPKB      | 1.28E+00 | 9.34E-04 | 2.68E-03 |
| ENSG00000248587 | GDNF-AS1   | 4.43E+00 | 9.36E-04 | 2.68E-03 |
| ENSG00000172350 | ABCG4      | 3.42E+00 | 9.42E-04 | 2.70E-03 |
| ENSG00000279491 | AP003733.3 | 3.56E+00 | 9.44E-04 | 2.70E-03 |
| ENSG00000238113 | LINC01410  | 2.99E+00 | 9.50E-04 | 2.72E-03 |
| ENSG00000286811 | AL353138.1 | 2.02E+00 | 9.57E-04 | 2.74E-03 |
| ENSG00000015133 | CCDC88C    | 1.75E+00 | 9.58E-04 | 2.74E-03 |
| ENSG00000198746 | GPATCH3    | 1.15E+00 | 9.59E-04 | 2.74E-03 |
| ENSG00000259374 | NDUFB4P11  | 3.88E+00 | 9.62E-04 | 2.75E-03 |
| ENSG00000158764 | ITLN2      | 4.69E+00 | 9.68E-04 | 2.76E-03 |

|                 |            |          |          |          |
|-----------------|------------|----------|----------|----------|
| ENSG00000107551 | RASSF4     | 1.50E+00 | 9.73E-04 | 2.78E-03 |
| ENSG00000181444 | ZNF467     | 4.08E+00 | 9.79E-04 | 2.79E-03 |
| ENSG00000136960 | ENPP2      | 2.36E+00 | 9.84E-04 | 2.81E-03 |
| ENSG00000257086 | AP001453.2 | 4.59E+00 | 9.86E-04 | 2.81E-03 |
| ENSG00000139629 | GALNT6     | 1.39E+00 | 9.91E-04 | 2.82E-03 |
| ENSG00000179913 | B3GNT3     | 4.67E+00 | 9.93E-04 | 2.83E-03 |
| ENSG00000177728 | TMEM94     | 1.24E+00 | 9.94E-04 | 2.83E-03 |
| ENSG00000198088 | NUP62CL    | 2.07E+00 | 9.95E-04 | 2.83E-03 |
| ENSG00000118308 | LRMP       | 4.09E+00 | 9.99E-04 | 2.84E-03 |
| ENSG00000177076 | ACER2      | 2.85E+00 | 1.00E-03 | 2.85E-03 |
| ENSG00000242732 | RTL5       | 2.00E+00 | 1.00E-03 | 2.85E-03 |
| ENSG00000272848 | AL135910.1 | 2.11E+00 | 1.00E-03 | 2.85E-03 |
| ENSG00000205913 | SRRM2-AS1  | 1.65E+00 | 1.01E-03 | 2.86E-03 |
| ENSG00000274897 | PANO1      | 1.97E+00 | 1.01E-03 | 2.87E-03 |
| ENSG00000270673 | YTHDF3-AS1 | 2.33E+00 | 1.01E-03 | 2.88E-03 |
| ENSG00000167971 | CASKIN1    | 2.47E+00 | 1.02E-03 | 2.90E-03 |
| ENSG00000168427 | KLHL30     | 2.92E+00 | 1.02E-03 | 2.91E-03 |
| ENSG00000079337 | RAPGEF3    | 3.37E+00 | 1.03E-03 | 2.91E-03 |
| ENSG00000206177 | HBM        | 5.32E+00 | 1.04E-03 | 2.94E-03 |
| ENSG00000006071 | ABCC8      | 4.85E+00 | 1.05E-03 | 2.96E-03 |
| ENSG00000214595 | EML6       | 2.54E+00 | 1.05E-03 | 2.98E-03 |
| ENSG00000111077 | TNS2       | 1.01E+00 | 1.05E-03 | 2.98E-03 |
| ENSG00000197279 | ZNF165     | 1.37E+00 | 1.06E-03 | 2.99E-03 |
| ENSG00000197375 | SLC22A5    | 1.09E+00 | 1.07E-03 | 3.03E-03 |
| ENSG00000275202 | AL161421.1 | 1.47E+00 | 1.08E-03 | 3.04E-03 |
| ENSG00000086730 | LAT2       | 3.26E+00 | 1.08E-03 | 3.06E-03 |
| ENSG00000176909 | MAMSTR     | 1.11E+00 | 1.09E-03 | 3.07E-03 |
| ENSG00000126259 | KIRREL2    | 4.25E+00 | 1.09E-03 | 3.07E-03 |
| ENSG00000151067 | CACNA1C    | 1.49E+00 | 1.09E-03 | 3.08E-03 |
| ENSG00000236502 | SIX3-AS1   | 5.13E+00 | 1.09E-03 | 3.09E-03 |
| ENSG00000173013 | CCDC96     | 1.62E+00 | 1.11E-03 | 3.13E-03 |
| ENSG00000261068 | AL512274.1 | 4.68E+00 | 1.12E-03 | 3.16E-03 |
| ENSG00000163131 | CTSS       | 1.05E+00 | 1.13E-03 | 3.17E-03 |
| ENSG00000177133 | PRDM16-DT  | 3.30E+00 | 1.13E-03 | 3.19E-03 |
| ENSG00000244482 | LILRA6     | 4.88E+00 | 1.14E-03 | 3.20E-03 |
| ENSG00000231711 | LINC00899  | 2.42E+00 | 1.14E-03 | 3.21E-03 |
| ENSG00000124370 | MCEE       | 1.12E+00 | 1.14E-03 | 3.21E-03 |
| ENSG00000160318 | CLDND2     | 2.04E+00 | 1.14E-03 | 3.21E-03 |
| ENSG00000149292 | TTC12      | 1.31E+00 | 1.15E-03 | 3.23E-03 |
| ENSG00000130731 | METTL26    | 1.23E+00 | 1.15E-03 | 3.24E-03 |
| ENSG00000187140 | FOXD3      | 3.76E+00 | 1.16E-03 | 3.27E-03 |
| ENSG00000106258 | CYP3A5     | 4.09E+00 | 1.17E-03 | 3.29E-03 |
| ENSG00000179284 | DAND5      | 3.54E+00 | 1.17E-03 | 3.29E-03 |
| ENSG00000067221 | STOML1     | 1.20E+00 | 1.18E-03 | 3.31E-03 |
| ENSG00000270761 | AL355353.1 | 4.31E+00 | 1.18E-03 | 3.31E-03 |



|                 |            |          |          |          |
|-----------------|------------|----------|----------|----------|
| ENSG00000253200 | AC037459.2 | 2.64E+00 | 1.20E-03 | 3.35E-03 |
| ENSG00000154319 | FAM167A    | 1.56E+00 | 1.20E-03 | 3.37E-03 |
| ENSG00000245025 | AC107959.1 | 2.15E+00 | 1.21E-03 | 3.37E-03 |
| ENSG00000246273 | SBF2-AS1   | 1.90E+00 | 1.22E-03 | 3.40E-03 |
| ENSG00000211892 | IGHG4      | 4.32E+00 | 1.22E-03 | 3.40E-03 |
| ENSG00000257815 | AC025159.1 | 1.58E+00 | 1.22E-03 | 3.41E-03 |
| ENSG00000272275 | AC092687.3 | 1.62E+00 | 1.23E-03 | 3.43E-03 |
| ENSG00000205464 | ATP6AP1L   | 1.22E+00 | 1.23E-03 | 3.43E-03 |
| ENSG00000049323 | LTBP1      | 1.13E+00 | 1.23E-03 | 3.43E-03 |
| ENSG00000156384 | SFR1       | 1.28E+00 | 1.23E-03 | 3.43E-03 |
| ENSG00000177363 | LRRN4CL    | 3.86E+00 | 1.24E-03 | 3.45E-03 |
| ENSG00000186732 | MPPED1     | 4.81E+00 | 1.25E-03 | 3.48E-03 |
| ENSG00000240405 | SAMMSON    | 5.04E+00 | 1.26E-03 | 3.50E-03 |
| ENSG00000163472 | TMEM79     | 1.20E+00 | 1.26E-03 | 3.51E-03 |
| ENSG00000239382 | ALKBH6     | 2.12E+00 | 1.26E-03 | 3.51E-03 |
| ENSG00000089127 | OAS1       | 3.67E+00 | 1.26E-03 | 3.52E-03 |
| ENSG00000283849 | AC092053.2 | 5.17E+00 | 1.26E-03 | 3.52E-03 |
| ENSG00000197993 | KEL        | 4.15E+00 | 1.26E-03 | 3.52E-03 |
| ENSG00000168404 | MLKL       | 1.21E+00 | 1.29E-03 | 3.58E-03 |
| ENSG00000286826 | AL136129.1 | 4.73E+00 | 1.29E-03 | 3.59E-03 |
| ENSG00000172901 | LVRN       | 3.32E+00 | 1.31E-03 | 3.64E-03 |
| ENSG00000255571 | MIR9-3HG   | 4.10E+00 | 1.31E-03 | 3.65E-03 |
| ENSG00000163686 | ABHD6      | 1.09E+00 | 1.31E-03 | 3.65E-03 |
| ENSG00000269729 | AC006262.2 | 2.97E+00 | 1.32E-03 | 3.65E-03 |
| ENSG00000172349 | IL16       | 4.34E+00 | 1.32E-03 | 3.67E-03 |
| ENSG00000197599 | CCDC154    | 2.92E+00 | 1.33E-03 | 3.70E-03 |
| ENSG00000188747 | NOXA1      | 3.60E+00 | 1.34E-03 | 3.71E-03 |
| ENSG00000242028 | HYPK       | 3.51E+00 | 1.34E-03 | 3.72E-03 |
| ENSG00000280399 | AC022497.1 | 4.85E+00 | 1.34E-03 | 3.72E-03 |
| ENSG00000145198 | VWA5B2     | 4.35E+00 | 1.35E-03 | 3.74E-03 |
| ENSG00000138311 | ZNF365     | 1.49E+00 | 1.36E-03 | 3.76E-03 |
| ENSG00000150054 | MPP7       | 2.87E+00 | 1.36E-03 | 3.76E-03 |
| ENSG00000206432 | TMEM200C   | 3.26E+00 | 1.39E-03 | 3.84E-03 |
| ENSG00000197971 | MBP        | 1.13E+00 | 1.40E-03 | 3.87E-03 |
| ENSG00000263531 | AC130324.1 | 3.95E+00 | 1.41E-03 | 3.88E-03 |
| ENSG00000130304 | SLC27A1    | 1.38E+00 | 1.41E-03 | 3.89E-03 |
| ENSG00000233542 | AL391845.2 | 5.47E+00 | 1.43E-03 | 3.93E-03 |
| ENSG00000129028 | THAP10     | 1.09E+00 | 1.43E-03 | 3.93E-03 |
| ENSG00000064201 | TSPAN32    | 5.08E+00 | 1.43E-03 | 3.94E-03 |
| ENSG00000057149 | SERPINB3   | 2.89E+00 | 1.43E-03 | 3.94E-03 |
| ENSG00000261481 | AC022167.4 | 5.00E+00 | 1.45E-03 | 3.99E-03 |
| ENSG00000002933 | TMEM176A   | 5.30E+00 | 1.45E-03 | 3.99E-03 |
| ENSG00000221995 | TIAF1      | 3.23E+00 | 1.47E-03 | 4.04E-03 |
| ENSG00000105509 | HAS1       | 4.80E+00 | 1.48E-03 | 4.07E-03 |
| ENSG00000243954 | RN7SL743P  | 4.73E+00 | 1.49E-03 | 4.08E-03 |

|                 |             |          |          |          |
|-----------------|-------------|----------|----------|----------|
| ENSG00000225914 | TSBP1-AS1   | 4.25E+00 | 1.49E-03 | 4.09E-03 |
| ENSG00000176532 | PRR15       | 5.09E+00 | 1.50E-03 | 4.12E-03 |
| ENSG00000241764 | AC002467.1  | 1.29E+00 | 1.50E-03 | 4.12E-03 |
| ENSG00000268401 | AC007785.3  | 3.64E+00 | 1.50E-03 | 4.12E-03 |
| ENSG00000188315 | C3orf62     | 1.13E+00 | 1.51E-03 | 4.13E-03 |
| ENSG00000128228 | SDF2L1      | 1.00E+00 | 1.51E-03 | 4.14E-03 |
| ENSG00000253891 | AC023202.1  | 4.69E+00 | 1.52E-03 | 4.16E-03 |
| ENSG00000211897 | IGHG3       | 4.35E+00 | 1.53E-03 | 4.19E-03 |
| ENSG00000183826 | BTBD9       | 1.39E+00 | 1.54E-03 | 4.21E-03 |
| ENSG00000196159 | FAT4        | 4.17E+00 | 1.55E-03 | 4.25E-03 |
| ENSG00000256443 | AP003559.1  | 4.73E+00 | 1.56E-03 | 4.25E-03 |
| ENSG00000236204 | LINC01376   | 4.55E+00 | 1.56E-03 | 4.26E-03 |
| ENSG00000172575 | RASGRP1     | 3.51E+00 | 1.56E-03 | 4.28E-03 |
| ENSG00000163328 | GPR155      | 1.76E+00 | 1.57E-03 | 4.28E-03 |
| ENSG00000238105 | GOLGA2P5    | 1.46E+00 | 1.57E-03 | 4.29E-03 |
| ENSG00000178150 | ZNF114      | 1.78E+00 | 1.58E-03 | 4.30E-03 |
| ENSG00000229921 | KIF25-AS1   | 5.00E+00 | 1.58E-03 | 4.30E-03 |
| ENSG00000213088 | ACKR1       | 3.24E+00 | 1.59E-03 | 4.35E-03 |
| ENSG00000123836 | PFKFB2      | 1.02E+00 | 1.59E-03 | 4.35E-03 |
| ENSG00000139132 | FGD4        | 1.35E+00 | 1.59E-03 | 4.35E-03 |
| ENSG00000267206 | LCN6        | 4.57E+00 | 1.61E-03 | 4.38E-03 |
| ENSG00000136689 | IL1RN       | 5.87E+00 | 1.61E-03 | 4.38E-03 |
| ENSG00000223638 | RFPL4A      | 4.05E+00 | 1.62E-03 | 4.41E-03 |
| ENSG00000167701 | GPT         | 3.83E+00 | 1.63E-03 | 4.43E-03 |
| ENSG00000167755 | KLK6        | 4.59E+00 | 1.63E-03 | 4.43E-03 |
| ENSG00000176884 | GRIN1       | 3.73E+00 | 1.63E-03 | 4.44E-03 |
| ENSG00000173093 | CCDC63      | 3.32E+00 | 1.63E-03 | 4.44E-03 |
| ENSG00000178537 | SLC25A20    | 1.24E+00 | 1.63E-03 | 4.44E-03 |
| ENSG00000165238 | WNK2        | 1.49E+00 | 1.64E-03 | 4.47E-03 |
| ENSG00000091622 | PITPNM3     | 2.12E+00 | 1.65E-03 | 4.47E-03 |
| ENSG00000170955 | CAVIN3      | 1.42E+00 | 1.66E-03 | 4.51E-03 |
| ENSG00000262484 | CCER2       | 2.97E+00 | 1.67E-03 | 4.52E-03 |
| ENSG00000286261 | AC022137.3  | 2.80E+00 | 1.68E-03 | 4.56E-03 |
| ENSG00000168481 | LGI3        | 2.28E+00 | 1.69E-03 | 4.58E-03 |
| ENSG00000116544 | DLGAP3      | 3.14E+00 | 1.69E-03 | 4.59E-03 |
| ENSG00000126947 | ARMCX1      | 1.53E+00 | 1.69E-03 | 4.59E-03 |
| ENSG00000006025 | OSBPL7      | 1.25E+00 | 1.70E-03 | 4.59E-03 |
| ENSG00000280213 | UCKL1-AS1   | 2.94E+00 | 1.70E-03 | 4.60E-03 |
| ENSG00000248429 | FAM198B-AS1 | 2.81E+00 | 1.70E-03 | 4.61E-03 |
| ENSG00000168781 | PPIP5K1     | 1.53E+00 | 1.73E-03 | 4.68E-03 |
| ENSG00000162105 | SHANK2      | 4.69E+00 | 1.73E-03 | 4.69E-03 |
| ENSG00000007237 | GAS7        | 2.68E+00 | 1.74E-03 | 4.71E-03 |
| ENSG00000230587 | LINC02580   | 5.48E+00 | 1.75E-03 | 4.72E-03 |
| ENSG00000135643 | KCNMB4      | 2.86E+00 | 1.76E-03 | 4.76E-03 |
| ENSG00000214174 | AMZ2P1      | 1.11E+00 | 1.76E-03 | 4.77E-03 |

|                 |             |          |          |          |
|-----------------|-------------|----------|----------|----------|
| ENSG00000183486 | MX2         | 2.14E+00 | 1.77E-03 | 4.79E-03 |
| ENSG00000130700 | GATA5       | 2.62E+00 | 1.78E-03 | 4.82E-03 |
| ENSG00000260366 | AC026803.1  | 4.71E+00 | 1.79E-03 | 4.83E-03 |
| ENSG00000166682 | TMPRSS5     | 3.72E+00 | 1.80E-03 | 4.85E-03 |
| ENSG00000212694 | LINC01089   | 1.42E+00 | 1.80E-03 | 4.85E-03 |
| ENSG00000105717 | PBX4        | 1.33E+00 | 1.80E-03 | 4.85E-03 |
| ENSG00000233098 | CCDC144NL-A | 2.82E+00 | 1.81E-03 | 4.89E-03 |
| ENSG00000260261 | AC124944.2  | 2.80E+00 | 1.81E-03 | 4.89E-03 |
| ENSG00000261889 | AC108134.2  | 1.91E+00 | 1.82E-03 | 4.91E-03 |
| ENSG00000232434 | AJM1        | 1.73E+00 | 1.83E-03 | 4.92E-03 |
| ENSG00000261787 | TCF24       | 4.15E+00 | 1.85E-03 | 4.97E-03 |
| ENSG00000138131 | LOXL4       | 3.73E+00 | 1.85E-03 | 4.97E-03 |
| ENSG00000166220 | TBATA       | 4.58E+00 | 1.85E-03 | 4.97E-03 |
| ENSG00000176771 | NCKAP5      | 1.32E+00 | 1.85E-03 | 4.98E-03 |
| ENSG00000153157 | SYCP2L      | 1.49E+00 | 1.85E-03 | 4.98E-03 |
| ENSG00000107742 | SPOCK2      | 2.98E+00 | 1.87E-03 | 5.03E-03 |
| ENSG00000101342 | TLDC2       | 4.82E+00 | 1.89E-03 | 5.07E-03 |
| ENSG00000106479 | ZNF862      | 2.30E+00 | 1.89E-03 | 5.08E-03 |
| ENSG00000236242 | MYO16-AS1   | 4.08E+00 | 1.89E-03 | 5.08E-03 |
| ENSG00000179564 | LSMEM2      | 4.29E+00 | 1.91E-03 | 5.13E-03 |
| ENSG00000182484 | WASH6P      | 1.50E+00 | 1.93E-03 | 5.18E-03 |
| ENSG00000131398 | KCNC3       | 3.76E+00 | 1.94E-03 | 5.19E-03 |
| ENSG00000151967 | SCHIP1      | 2.35E+00 | 1.95E-03 | 5.22E-03 |
| ENSG00000134020 | PEBP4       | 3.69E+00 | 1.96E-03 | 5.23E-03 |
| ENSG00000168135 | KCNJ4       | 3.83E+00 | 1.96E-03 | 5.23E-03 |
| ENSG00000167476 | JSRP1       | 3.09E+00 | 1.96E-03 | 5.24E-03 |
| ENSG00000160401 | CFAP157     | 3.02E+00 | 1.96E-03 | 5.24E-03 |
| ENSG00000166145 | SPINT1      | 2.15E+00 | 1.97E-03 | 5.27E-03 |
| ENSG00000239653 | PSMD6-AS2   | 1.35E+00 | 1.98E-03 | 5.29E-03 |
| ENSG00000124134 | KCNS1       | 3.44E+00 | 2.04E-03 | 5.43E-03 |
| ENSG00000175356 | SCUBE2      | 1.95E+00 | 2.04E-03 | 5.44E-03 |
| ENSG00000162438 | CTRC        | 4.06E+00 | 2.05E-03 | 5.45E-03 |
| ENSG00000198754 | OXCT2       | 3.93E+00 | 2.05E-03 | 5.45E-03 |
| ENSG00000164078 | MST1R       | 4.27E+00 | 2.06E-03 | 5.49E-03 |
| ENSG00000272115 | AC233992.3  | 3.88E+00 | 2.07E-03 | 5.50E-03 |
| ENSG00000283525 | AC005622.1  | 4.67E+00 | 2.07E-03 | 5.50E-03 |
| ENSG00000230753 | ZNF341-AS1  | 3.85E+00 | 2.08E-03 | 5.52E-03 |
| ENSG00000158467 | AHCYL2      | 1.20E+00 | 2.08E-03 | 5.53E-03 |
| ENSG00000249242 | TMEM150C    | 2.79E+00 | 2.08E-03 | 5.54E-03 |
| ENSG00000184349 | EFNA5       | 3.99E+00 | 2.09E-03 | 5.56E-03 |
| ENSG00000156711 | MAPK13      | 2.01E+00 | 2.11E-03 | 5.60E-03 |
| ENSG00000187098 | MITF        | 1.24E+00 | 2.11E-03 | 5.60E-03 |
| ENSG00000100298 | APOBEC3H    | 3.67E+00 | 2.12E-03 | 5.62E-03 |
| ENSG00000143851 | PTPN7       | 4.26E+00 | 2.13E-03 | 5.65E-03 |
| ENSG00000287553 | AC090617.10 | 2.51E+00 | 2.15E-03 | 5.69E-03 |

|                 |              |          |          |          |
|-----------------|--------------|----------|----------|----------|
| ENSG00000257831 | AL136418.1   | 5.10E+00 | 2.16E-03 | 5.73E-03 |
| ENSG00000204791 | SMPD5        | 4.55E+00 | 2.18E-03 | 5.77E-03 |
| ENSG00000181240 | SLC25A41     | 3.72E+00 | 2.19E-03 | 5.80E-03 |
| ENSG00000272086 | AC025181.2   | 1.70E+00 | 2.20E-03 | 5.83E-03 |
| ENSG00000266498 | AC055811.3   | 2.16E+00 | 2.25E-03 | 5.94E-03 |
| ENSG00000152527 | PLEKHH2      | 1.66E+00 | 2.26E-03 | 5.95E-03 |
| ENSG00000229539 | AL353194.1   | 1.60E+00 | 2.26E-03 | 5.96E-03 |
| ENSG00000101230 | ISM1         | 2.14E+00 | 2.29E-03 | 6.02E-03 |
| ENSG00000155749 | FLACC1       | 2.05E+00 | 2.31E-03 | 6.08E-03 |
| ENSG00000111249 | CUX2         | 4.09E+00 | 2.31E-03 | 6.08E-03 |
| ENSG00000263874 | LINC00672    | 2.99E+00 | 2.32E-03 | 6.10E-03 |
| ENSG00000245571 | FAM111A-DT   | 2.18E+00 | 2.32E-03 | 6.11E-03 |
| ENSG00000164287 | CDC20B       | 4.09E+00 | 2.33E-03 | 6.12E-03 |
| ENSG00000185761 | ADAMTSL5     | 1.57E+00 | 2.34E-03 | 6.14E-03 |
| ENSG00000197616 | MYH6         | 4.37E+00 | 2.34E-03 | 6.14E-03 |
| ENSG00000127507 | ADGRE2       | 2.55E+00 | 2.34E-03 | 6.15E-03 |
| ENSG00000261997 | AC007336.1   | 2.84E+00 | 2.34E-03 | 6.16E-03 |
| ENSG00000120645 | IQSEC3       | 4.63E+00 | 2.35E-03 | 6.16E-03 |
| ENSG00000166268 | MYRFL        | 5.04E+00 | 2.36E-03 | 6.20E-03 |
| ENSG00000132109 | TRIM21       | 1.11E+00 | 2.37E-03 | 6.23E-03 |
| ENSG00000169918 | OTUD7A       | 4.57E+00 | 2.38E-03 | 6.25E-03 |
| ENSG00000144712 | CAND2        | 2.66E+00 | 2.39E-03 | 6.26E-03 |
| ENSG00000165025 | SYK          | 4.49E+00 | 2.39E-03 | 6.27E-03 |
| ENSG00000235538 | AL078602.1   | 3.75E+00 | 2.40E-03 | 6.29E-03 |
| ENSG00000104728 | ARHGEF10     | 1.17E+00 | 2.41E-03 | 6.31E-03 |
| ENSG00000142233 | NTN5         | 4.46E+00 | 2.42E-03 | 6.34E-03 |
| ENSG00000183484 | GPR132       | 5.54E+00 | 2.43E-03 | 6.36E-03 |
| ENSG00000275527 | AC100835.2   | 4.69E+00 | 2.44E-03 | 6.38E-03 |
| ENSG00000175003 | SLC22A1      | 2.11E+00 | 2.46E-03 | 6.44E-03 |
| ENSG00000139174 | PRICKLE1     | 1.77E+00 | 2.47E-03 | 6.45E-03 |
| ENSG00000119946 | CNNM1        | 2.66E+00 | 2.48E-03 | 6.49E-03 |
| ENSG00000263006 | ROCK1P1      | 3.55E+00 | 2.49E-03 | 6.51E-03 |
| ENSG00000169220 | RGS14        | 1.27E+00 | 2.49E-03 | 6.51E-03 |
| ENSG00000169252 | ADRB2        | 3.19E+00 | 2.50E-03 | 6.53E-03 |
| ENSG00000237945 | LINC00649    | 3.71E+00 | 2.52E-03 | 6.58E-03 |
| ENSG00000258457 | AL132780.2   | 2.10E+00 | 2.53E-03 | 6.59E-03 |
| ENSG00000283361 | CFAP97D2     | 4.70E+00 | 2.53E-03 | 6.60E-03 |
| ENSG00000257950 | P2RX5-TAX1BF | 2.59E+00 | 2.54E-03 | 6.64E-03 |
| ENSG00000187902 | SHISA7       | 4.67E+00 | 2.55E-03 | 6.65E-03 |
| ENSG00000004777 | ARHGAP33     | 1.29E+00 | 2.55E-03 | 6.65E-03 |
| ENSG00000225828 | FAM229A      | 1.63E+00 | 2.55E-03 | 6.65E-03 |
| ENSG00000142405 | NLRP12       | 4.42E+00 | 2.56E-03 | 6.68E-03 |
| ENSG00000013725 | CD6          | 4.62E+00 | 2.57E-03 | 6.69E-03 |
| ENSG00000012124 | CD22         | 3.94E+00 | 2.58E-03 | 6.73E-03 |
| ENSG00000168936 | TMEM129      | 1.14E+00 | 2.58E-03 | 6.73E-03 |

|                 |            |          |          |          |
|-----------------|------------|----------|----------|----------|
| ENSG00000230798 | FOXD3-AS1  | 2.27E+00 | 2.60E-03 | 6.77E-03 |
| ENSG00000272789 | AC010976.2 | 2.62E+00 | 2.60E-03 | 6.78E-03 |
| ENSG00000231811 | AL159166.1 | 4.88E+00 | 2.62E-03 | 6.81E-03 |
| ENSG00000276166 | AC092118.2 | 3.50E+00 | 2.65E-03 | 6.88E-03 |
| ENSG00000130997 | POLN       | 2.85E+00 | 2.67E-03 | 6.92E-03 |
| ENSG00000285437 | POLR2J3    | 3.44E+00 | 2.67E-03 | 6.93E-03 |
| ENSG00000254402 | LRRC24     | 1.71E+00 | 2.68E-03 | 6.95E-03 |
| ENSG00000258982 | AL133523.1 | 4.07E+00 | 2.68E-03 | 6.96E-03 |
| ENSG00000136828 | RALGPS1    | 1.83E+00 | 2.71E-03 | 7.03E-03 |
| ENSG00000169704 | GP9        | 4.57E+00 | 2.73E-03 | 7.07E-03 |
| ENSG00000064225 | ST3GAL6    | 1.29E+00 | 2.73E-03 | 7.08E-03 |
| ENSG00000138795 | LEF1       | 3.34E+00 | 2.73E-03 | 7.08E-03 |
| ENSG00000228793 | AL033523.1 | 1.78E+00 | 2.74E-03 | 7.08E-03 |
| ENSG00000134569 | LRP4       | 1.15E+00 | 2.74E-03 | 7.11E-03 |
| ENSG00000135299 | ANKRD6     | 1.36E+00 | 2.75E-03 | 7.11E-03 |
| ENSG00000158458 | NRG2       | 1.75E+00 | 2.76E-03 | 7.13E-03 |
| ENSG00000231133 | HAR1B      | 3.71E+00 | 2.76E-03 | 7.14E-03 |
| ENSG00000157368 | IL34       | 1.79E+00 | 2.81E-03 | 7.27E-03 |
| ENSG00000140986 | RPL3L      | 4.52E+00 | 2.82E-03 | 7.28E-03 |
| ENSG00000245498 | AP000866.1 | 1.99E+00 | 2.82E-03 | 7.29E-03 |
| ENSG00000149781 | FERMT3     | 1.78E+00 | 2.83E-03 | 7.31E-03 |
| ENSG00000070886 | EPHA8      | 4.09E+00 | 2.85E-03 | 7.34E-03 |
| ENSG00000186364 | NUDT17     | 1.43E+00 | 2.85E-03 | 7.34E-03 |
| ENSG00000232931 | LINC00342  | 1.10E+00 | 2.85E-03 | 7.35E-03 |
| ENSG00000153363 | LINC00467  | 1.40E+00 | 2.89E-03 | 7.44E-03 |
| ENSG00000279502 | AC016542.2 | 1.85E+00 | 2.91E-03 | 7.51E-03 |
| ENSG00000172508 | CARNS1     | 2.96E+00 | 2.94E-03 | 7.56E-03 |
| ENSG00000133739 | LRRC1      | 1.12E+00 | 2.96E-03 | 7.61E-03 |
| ENSG00000274678 | AC106886.3 | 4.34E+00 | 3.00E-03 | 7.71E-03 |
| ENSG00000260778 | AC009065.4 | 1.88E+00 | 3.03E-03 | 7.80E-03 |
| ENSG00000109819 | PPARGC1A   | 5.10E+00 | 3.06E-03 | 7.87E-03 |
| ENSG00000138378 | STAT4      | 4.56E+00 | 3.06E-03 | 7.88E-03 |
| ENSG00000129009 | ISLR       | 3.85E+00 | 3.08E-03 | 7.91E-03 |
| ENSG00000007129 | CEACAM21   | 4.89E+00 | 3.09E-03 | 7.94E-03 |
| ENSG00000286940 | AL645933.3 | 3.52E+00 | 3.10E-03 | 7.95E-03 |
| ENSG00000172201 | ID4        | 1.96E+00 | 3.10E-03 | 7.96E-03 |
| ENSG00000187134 | AKR1C1     | 2.26E+00 | 3.10E-03 | 7.97E-03 |
| ENSG00000002745 | WNT16      | 4.78E+00 | 3.11E-03 | 7.98E-03 |
| ENSG00000178226 | PRSS36     | 3.62E+00 | 3.12E-03 | 8.01E-03 |
| ENSG00000274414 | AL121772.1 | 4.57E+00 | 3.13E-03 | 8.02E-03 |
| ENSG00000268218 | AC137932.3 | 3.28E+00 | 3.13E-03 | 8.03E-03 |
| ENSG00000138821 | SLC39A8    | 2.38E+00 | 3.15E-03 | 8.06E-03 |
| ENSG00000214553 | LRRC37A11P | 4.38E+00 | 3.15E-03 | 8.08E-03 |
| ENSG00000267751 | AC009005.1 | 1.75E+00 | 3.15E-03 | 8.08E-03 |
| ENSG00000279981 | AC018445.4 | 2.03E+00 | 3.16E-03 | 8.10E-03 |

|                 |            |          |          |          |
|-----------------|------------|----------|----------|----------|
| ENSG00000269246 | AC011445.2 | 2.19E+00 | 3.17E-03 | 8.11E-03 |
| ENSG00000198835 | GJC2       | 2.15E+00 | 3.19E-03 | 8.16E-03 |
| ENSG00000287853 | AL031668.2 | 1.85E+00 | 3.19E-03 | 8.17E-03 |
| ENSG00000273356 | LINC02019  | 3.29E+00 | 3.19E-03 | 8.17E-03 |
| ENSG00000149043 | SYT8       | 3.91E+00 | 3.23E-03 | 8.26E-03 |
| ENSG00000124507 | PACSIN1    | 3.21E+00 | 3.26E-03 | 8.32E-03 |
| ENSG00000130768 | SMPDL3B    | 2.50E+00 | 3.29E-03 | 8.39E-03 |
| ENSG00000100307 | CBX7       | 1.53E+00 | 3.30E-03 | 8.43E-03 |
| ENSG00000198203 | SULT1C2    | 3.73E+00 | 3.32E-03 | 8.47E-03 |
| ENSG00000286147 | AC092445.1 | 4.65E+00 | 3.33E-03 | 8.50E-03 |
| ENSG00000023839 | ABCC2      | 1.60E+00 | 3.34E-03 | 8.51E-03 |
| ENSG00000233558 | AL050331.1 | 2.09E+00 | 3.34E-03 | 8.51E-03 |
| ENSG00000279571 | AL162426.1 | 3.06E+00 | 3.35E-03 | 8.54E-03 |
| ENSG00000271784 | AL031055.1 | 2.90E+00 | 3.37E-03 | 8.57E-03 |
| ENSG00000174460 | ZCCHC12    | 3.03E+00 | 3.37E-03 | 8.57E-03 |
| ENSG00000214612 | RPS19P1    | 1.93E+00 | 3.37E-03 | 8.58E-03 |
| ENSG00000185100 | ADSSL1     | 2.12E+00 | 3.38E-03 | 8.60E-03 |
| ENSG00000143387 | CTSK       | 1.80E+00 | 3.39E-03 | 8.61E-03 |
| ENSG00000116254 | CHD5       | 2.03E+00 | 3.39E-03 | 8.63E-03 |
| ENSG00000155974 | GRIP1      | 3.03E+00 | 3.40E-03 | 8.63E-03 |
| ENSG00000143110 | C1orf162   | 2.70E+00 | 3.41E-03 | 8.67E-03 |
| ENSG00000158258 | CLSTN2     | 1.58E+00 | 3.42E-03 | 8.68E-03 |
| ENSG00000169031 | COL4A3     | 4.79E+00 | 3.44E-03 | 8.72E-03 |
| ENSG00000130427 | EPO        | 4.54E+00 | 3.45E-03 | 8.74E-03 |
| ENSG00000225180 | PVALEF     | 4.72E+00 | 3.47E-03 | 8.79E-03 |
| ENSG00000255200 | PGAM1P8    | 2.33E+00 | 3.48E-03 | 8.82E-03 |
| ENSG00000288398 | AL109627.1 | 1.85E+00 | 3.48E-03 | 8.83E-03 |
| ENSG00000111199 | TRPV4      | 1.45E+00 | 3.49E-03 | 8.84E-03 |
| ENSG00000279208 | CR381653.2 | 4.36E+00 | 3.50E-03 | 8.85E-03 |
| ENSG00000170989 | S1PR1      | 2.83E+00 | 3.51E-03 | 8.87E-03 |
| ENSG00000224330 | AC005019.2 | 4.27E+00 | 3.56E-03 | 8.99E-03 |
| ENSG00000233223 | AC016876.1 | 1.31E+00 | 3.56E-03 | 9.01E-03 |
| ENSG00000214514 | KRT42P     | 5.61E+00 | 3.57E-03 | 9.01E-03 |
| ENSG00000179846 | NKPD1      | 4.61E+00 | 3.58E-03 | 9.06E-03 |
| ENSG00000144681 | STAC       | 2.29E+00 | 3.59E-03 | 9.06E-03 |
| ENSG00000176927 | EFCAB5     | 2.01E+00 | 3.59E-03 | 9.07E-03 |
| ENSG00000180316 | PNPLA1     | 3.80E+00 | 3.62E-03 | 9.13E-03 |
| ENSG00000075945 | KIFAP3     | 1.04E+00 | 3.64E-03 | 9.17E-03 |
| ENSG00000176472 | ZNF575     | 2.13E+00 | 3.68E-03 | 9.27E-03 |
| ENSG00000230027 | AC092813.2 | 4.64E+00 | 3.68E-03 | 9.28E-03 |
| ENSG00000186190 | BPIFB3     | 4.61E+00 | 3.70E-03 | 9.30E-03 |
| ENSG00000264023 | AC068418.1 | 4.72E+00 | 3.72E-03 | 9.36E-03 |
| ENSG00000242439 | AC127024.1 | 5.07E+00 | 3.74E-03 | 9.41E-03 |
| ENSG00000185527 | PDE6G      | 2.29E+00 | 3.75E-03 | 9.43E-03 |
| ENSG00000245975 | AC090515.2 | 4.85E+00 | 3.75E-03 | 9.43E-03 |

|                 |            |          |          |          |
|-----------------|------------|----------|----------|----------|
| ENSG00000232453 | LINC02777  | 3.34E+00 | 3.75E-03 | 9.44E-03 |
| ENSG00000105219 | CNTD2      | 3.32E+00 | 3.78E-03 | 9.50E-03 |
| ENSG00000095587 | TLL2       | 2.90E+00 | 3.79E-03 | 9.52E-03 |
| ENSG00000181126 | HLA-V      | 4.68E+00 | 3.81E-03 | 9.56E-03 |
| ENSG00000105880 | DLX5       | 5.02E+00 | 3.82E-03 | 9.58E-03 |
| ENSG00000272457 | AC113194.1 | 3.57E+00 | 3.82E-03 | 9.59E-03 |
| ENSG00000273001 | AL731533.2 | 3.83E+00 | 3.82E-03 | 9.59E-03 |
| ENSG00000276744 | AC105137.2 | 3.70E+00 | 3.84E-03 | 9.63E-03 |
| ENSG00000286519 | AC009236.1 | 2.48E+00 | 3.85E-03 | 9.65E-03 |
| ENSG00000103044 | HAS3       | 1.30E+00 | 3.86E-03 | 9.67E-03 |
| ENSG00000228801 | AC064807.1 | 1.22E+00 | 3.87E-03 | 9.70E-03 |
| ENSG00000185436 | IFNLR1     | 2.16E+00 | 3.88E-03 | 9.72E-03 |
| ENSG00000225442 | MPRIP-AS1  | 5.12E+00 | 3.90E-03 | 9.77E-03 |
| ENSG00000163617 | CCDC191    | 1.27E+00 | 3.91E-03 | 9.79E-03 |
| ENSG00000143595 | AQP10      | 3.81E+00 | 3.93E-03 | 9.84E-03 |
| ENSG00000215218 | UBE2QL1    | 2.18E+00 | 3.94E-03 | 9.88E-03 |
| ENSG00000125510 | OPRL1      | 2.59E+00 | 3.96E-03 | 9.92E-03 |
| ENSG00000181585 | TMIE       | 3.02E+00 | 3.97E-03 | 9.94E-03 |
| ENSG00000163701 | IL17RE     | 4.26E+00 | 3.97E-03 | 9.94E-03 |
| ENSG00000248932 | AC046134.2 | 2.57E+00 | 3.97E-03 | 9.94E-03 |
| ENSG00000182557 | SPNS3      | 3.78E+00 | 3.99E-03 | 9.97E-03 |
| ENSG00000276851 | AC002401.4 | 1.65E+00 | 3.99E-03 | 9.97E-03 |
| ENSG00000124257 | NEURL2     | 1.44E+00 | 4.00E-03 | 9.98E-03 |
| ENSG00000198155 | ZNF876P    | 1.60E+00 | 4.00E-03 | 1.00E-02 |
| ENSG00000250731 | TPM3P6     | 3.12E+00 | 4.00E-03 | 1.00E-02 |
| ENSG00000102981 | PARD6A     | 2.81E+00 | 4.08E-03 | 1.02E-02 |
| ENSG00000259947 | LINC02124  | 5.05E+00 | 4.10E-03 | 1.02E-02 |
| ENSG00000285693 | AP002381.2 | 1.37E+00 | 4.10E-03 | 1.02E-02 |
| ENSG00000107954 | NEURL1     | 3.46E+00 | 4.12E-03 | 1.03E-02 |
| ENSG00000142621 | FHAD1      | 2.54E+00 | 4.13E-03 | 1.03E-02 |
| ENSG00000127831 | VIL1       | 3.13E+00 | 4.16E-03 | 1.04E-02 |
| ENSG00000021488 | SLC7A9     | 3.91E+00 | 4.16E-03 | 1.04E-02 |
| ENSG00000177614 | PGBD5      | 3.01E+00 | 4.17E-03 | 1.04E-02 |
| ENSG00000272686 | AC006333.2 | 1.26E+00 | 4.18E-03 | 1.04E-02 |
| ENSG00000143195 | ILDR2      | 3.78E+00 | 4.23E-03 | 1.05E-02 |
| ENSG00000272744 | AC107214.2 | 2.56E+00 | 4.24E-03 | 1.06E-02 |
| ENSG00000105514 | RAB3D      | 1.28E+00 | 4.26E-03 | 1.06E-02 |
| ENSG00000151650 | VENTX      | 4.60E+00 | 4.26E-03 | 1.06E-02 |
| ENSG00000121966 | CXCR4      | 4.81E+00 | 4.27E-03 | 1.06E-02 |
| ENSG00000273162 | AL133215.2 | 2.15E+00 | 4.28E-03 | 1.06E-02 |
| ENSG00000278662 | GOLGA6L10  | 1.63E+00 | 4.30E-03 | 1.07E-02 |
| ENSG00000250802 | ZBED3-AS1  | 2.26E+00 | 4.32E-03 | 1.07E-02 |
| ENSG00000189149 | CRYM-AS1   | 2.99E+00 | 4.35E-03 | 1.08E-02 |
| ENSG00000185433 | LINC00158  | 4.10E+00 | 4.37E-03 | 1.08E-02 |
| ENSG00000164674 | SYTL3      | 2.10E+00 | 4.39E-03 | 1.09E-02 |

|                 |            |          |          |          |
|-----------------|------------|----------|----------|----------|
| ENSG00000129214 | SHBG       | 2.19E+00 | 4.43E-03 | 1.10E-02 |
| ENSG00000127084 | FGD3       | 3.86E+00 | 4.44E-03 | 1.10E-02 |
| ENSG00000137198 | GMPR       | 1.58E+00 | 4.47E-03 | 1.11E-02 |
| ENSG00000168038 | ULK4       | 1.19E+00 | 4.50E-03 | 1.11E-02 |
| ENSG00000101489 | CELF4      | 4.54E+00 | 4.51E-03 | 1.12E-02 |
| ENSG00000099953 | MMP11      | 1.36E+00 | 4.53E-03 | 1.12E-02 |
| ENSG00000146856 | AGBL3      | 1.47E+00 | 4.55E-03 | 1.12E-02 |
| ENSG00000266010 | GATA6-AS1  | 1.85E+00 | 4.55E-03 | 1.12E-02 |
| ENSG00000187268 | FAM9C      | 4.19E+00 | 4.56E-03 | 1.13E-02 |
| ENSG00000284640 | AL590434.1 | 3.69E+00 | 4.59E-03 | 1.13E-02 |
| ENSG00000175877 | TMEM270    | 4.05E+00 | 4.61E-03 | 1.14E-02 |
| ENSG00000112499 | SLC22A2    | 3.77E+00 | 4.63E-03 | 1.14E-02 |
| ENSG00000157087 | ATP2B2     | 3.87E+00 | 4.65E-03 | 1.15E-02 |
| ENSG00000099219 | ERMP1      | 1.52E+00 | 4.65E-03 | 1.15E-02 |
| ENSG00000219133 | AL592114.1 | 3.56E+00 | 4.66E-03 | 1.15E-02 |
| ENSG00000111846 | GCNT2      | 1.65E+00 | 4.66E-03 | 1.15E-02 |
| ENSG00000126218 | F10        | 3.89E+00 | 4.68E-03 | 1.15E-02 |
| ENSG00000265933 | LINC00668  | 5.04E+00 | 4.73E-03 | 1.17E-02 |
| ENSG00000028137 | TNFRSF1B   | 1.24E+00 | 4.74E-03 | 1.17E-02 |
| ENSG00000183091 | NEB        | 4.36E+00 | 4.77E-03 | 1.17E-02 |
| ENSG00000140285 | FGF7       | 4.28E+00 | 4.77E-03 | 1.17E-02 |
| ENSG00000257513 | NPIPB1P    | 4.05E+00 | 4.79E-03 | 1.18E-02 |
| ENSG00000180549 | FUT7       | 5.00E+00 | 4.87E-03 | 1.20E-02 |
| ENSG00000123329 | ARHGAP9    | 4.27E+00 | 4.87E-03 | 1.20E-02 |
| ENSG00000174358 | SLC6A19    | 4.94E+00 | 4.88E-03 | 1.20E-02 |
| ENSG00000205269 | TMEM170B   | 1.57E+00 | 4.93E-03 | 1.21E-02 |
| ENSG00000086967 | MYBPC2     | 4.49E+00 | 4.94E-03 | 1.21E-02 |
| ENSG00000167617 | CDC42EP5   | 2.60E+00 | 4.94E-03 | 1.21E-02 |
| ENSG00000245275 | SAP30L-AS1 | 1.93E+00 | 4.96E-03 | 1.22E-02 |
| ENSG00000231160 | KLF3-AS1   | 3.22E+00 | 4.99E-03 | 1.22E-02 |
| ENSG00000226251 | LINC02608  | 3.59E+00 | 5.03E-03 | 1.23E-02 |
| ENSG00000287814 | AC011407.1 | 4.72E+00 | 5.03E-03 | 1.23E-02 |
| ENSG00000286782 | AL355377.3 | 4.09E+00 | 5.04E-03 | 1.23E-02 |
| ENSG00000121075 | TBX4       | 4.17E+00 | 5.14E-03 | 1.26E-02 |
| ENSG00000283646 | LINC02009  | 3.99E+00 | 5.18E-03 | 1.27E-02 |
| ENSG00000278192 | AL118505.1 | 4.95E+00 | 5.25E-03 | 1.28E-02 |
| ENSG00000188818 | ZDHC11     | 1.88E+00 | 5.26E-03 | 1.28E-02 |
| ENSG00000270000 | AC005479.2 | 2.47E+00 | 5.27E-03 | 1.29E-02 |
| ENSG00000100253 | MIOX       | 3.45E+00 | 5.31E-03 | 1.29E-02 |
| ENSG00000115705 | TPO        | 4.63E+00 | 5.34E-03 | 1.30E-02 |
| ENSG00000246203 | AL353807.3 | 3.06E+00 | 5.34E-03 | 1.30E-02 |
| ENSG00000135218 | CD36       | 3.87E+00 | 5.39E-03 | 1.31E-02 |
| ENSG00000235663 | SAPCD1-AS1 | 3.55E+00 | 5.39E-03 | 1.31E-02 |
| ENSG00000149418 | ST14       | 3.32E+00 | 5.41E-03 | 1.32E-02 |
| ENSG00000146243 | IRAK1BP1   | 1.89E+00 | 5.45E-03 | 1.32E-02 |



|                 |            |          |          |          |
|-----------------|------------|----------|----------|----------|
| ENSG00000168631 | MUCL3      | 4.45E+00 | 5.46E-03 | 1.33E-02 |
| ENSG00000279806 | AC018629.1 | 4.71E+00 | 5.46E-03 | 1.33E-02 |
| ENSG00000266983 | AC011444.1 | 4.29E+00 | 5.47E-03 | 1.33E-02 |
| ENSG00000261790 | AC005606.2 | 4.07E+00 | 5.50E-03 | 1.33E-02 |
| ENSG00000100628 | ASB2       | 3.66E+00 | 5.50E-03 | 1.33E-02 |
| ENSG00000106733 | NMRK1      | 2.29E+00 | 5.50E-03 | 1.34E-02 |
| ENSG00000240891 | PLCXD2     | 1.37E+00 | 5.52E-03 | 1.34E-02 |
| ENSG00000279901 | AC092117.2 | 1.86E+00 | 5.54E-03 | 1.34E-02 |
| ENSG00000089199 | CHGB       | 3.20E+00 | 5.58E-03 | 1.35E-02 |
| ENSG00000115267 | IFIH1      | 1.31E+00 | 5.62E-03 | 1.36E-02 |
| ENSG00000115297 | TLX2       | 1.64E+00 | 5.67E-03 | 1.37E-02 |
| ENSG00000186907 | RTN4RL2    | 2.04E+00 | 5.69E-03 | 1.38E-02 |
| ENSG00000109265 | KIAA1211   | 2.59E+00 | 5.72E-03 | 1.38E-02 |
| ENSG00000286001 | AC021087.5 | 2.37E+00 | 5.72E-03 | 1.38E-02 |
| ENSG00000243396 | AC084198.1 | 5.05E+00 | 5.75E-03 | 1.39E-02 |
| ENSG00000279232 | AC008522.1 | 4.72E+00 | 5.76E-03 | 1.39E-02 |
| ENSG00000227070 | AC104170.1 | 3.77E+00 | 5.79E-03 | 1.40E-02 |
| ENSG00000171428 | NAT1       | 1.25E+00 | 5.79E-03 | 1.40E-02 |
| ENSG00000288086 | AL157414.4 | 4.55E+00 | 5.80E-03 | 1.40E-02 |
| ENSG00000279792 | AC015909.5 | 1.39E+00 | 5.84E-03 | 1.41E-02 |
| ENSG00000287126 | AC108488.3 | 1.55E+00 | 5.87E-03 | 1.41E-02 |
| ENSG00000004939 | SLC4A1     | 4.32E+00 | 5.93E-03 | 1.43E-02 |
| ENSG00000184481 | FOXO4      | 1.40E+00 | 5.94E-03 | 1.43E-02 |
| ENSG00000105991 | HOXA1      | 2.46E+00 | 5.95E-03 | 1.43E-02 |
| ENSG00000125798 | FOXA2      | 2.14E+00 | 5.95E-03 | 1.43E-02 |
| ENSG00000136883 | KIF12      | 4.42E+00 | 5.99E-03 | 1.44E-02 |
| ENSG00000129646 | QRICH2     | 2.27E+00 | 6.00E-03 | 1.44E-02 |
| ENSG00000181143 | MUC16      | 5.27E+00 | 6.13E-03 | 1.47E-02 |
| ENSG00000232653 | GOLGA8N    | 3.35E+00 | 6.17E-03 | 1.48E-02 |
| ENSG00000126460 | PRRG2      | 1.30E+00 | 6.18E-03 | 1.48E-02 |
| ENSG00000156172 | C8orf37    | 1.57E+00 | 6.18E-03 | 1.48E-02 |
| ENSG00000109576 | AADAT      | 1.10E+00 | 6.19E-03 | 1.48E-02 |
| ENSG00000166888 | STAT6      | 2.56E+00 | 6.20E-03 | 1.48E-02 |
| ENSG00000069424 | KCNAB2     | 1.16E+00 | 6.22E-03 | 1.49E-02 |
| ENSG00000198416 | ZNF658B    | 4.35E+00 | 6.24E-03 | 1.49E-02 |
| ENSG00000088320 | REM1       | 3.81E+00 | 6.26E-03 | 1.49E-02 |
| ENSG00000235961 | PNMA6A     | 1.63E+00 | 6.29E-03 | 1.50E-02 |
| ENSG00000100362 | PVALB      | 4.08E+00 | 6.32E-03 | 1.51E-02 |
| ENSG00000226281 | AL031123.1 | 3.80E+00 | 6.34E-03 | 1.51E-02 |
| ENSG00000260190 | AL807752.5 | 2.28E+00 | 6.35E-03 | 1.51E-02 |
| ENSG00000058453 | CROCC      | 1.00E+00 | 6.37E-03 | 1.52E-02 |
| ENSG00000167371 | PRRT2      | 1.61E+00 | 6.37E-03 | 1.52E-02 |
| ENSG00000251615 | AC104825.1 | 1.90E+00 | 6.38E-03 | 1.52E-02 |
| ENSG00000183060 | LYSMD4     | 1.00E+00 | 6.41E-03 | 1.53E-02 |
| ENSG00000074047 | GLI2       | 1.08E+00 | 6.41E-03 | 1.53E-02 |

|                 |            |          |          |          |
|-----------------|------------|----------|----------|----------|
| ENSG00000154760 | SLFN13     | 2.69E+00 | 6.43E-03 | 1.53E-02 |
| ENSG00000267083 | KRT18P61   | 2.29E+00 | 6.47E-03 | 1.54E-02 |
| ENSG00000181016 | LSMEM1     | 1.60E+00 | 6.49E-03 | 1.55E-02 |
| ENSG00000100027 | YPEL1      | 1.84E+00 | 6.51E-03 | 1.55E-02 |
| ENSG00000227744 | LINC01940  | 4.51E+00 | 6.51E-03 | 1.55E-02 |
| ENSG00000142347 | MYO1F      | 2.69E+00 | 6.57E-03 | 1.56E-02 |
| ENSG00000100299 | ARSA       | 1.10E+00 | 6.58E-03 | 1.57E-02 |
| ENSG00000070808 | CAMK2A     | 2.34E+00 | 6.59E-03 | 1.57E-02 |
| ENSG00000267577 | AC010327.4 | 4.10E+00 | 6.60E-03 | 1.57E-02 |
| ENSG00000278891 | AC105101.1 | 4.54E+00 | 6.63E-03 | 1.57E-02 |
| ENSG00000187796 | CARD9      | 1.90E+00 | 6.65E-03 | 1.58E-02 |
| ENSG00000105205 | CLC        | 4.44E+00 | 6.65E-03 | 1.58E-02 |
| ENSG00000131055 | COX4I2     | 4.77E+00 | 6.66E-03 | 1.58E-02 |
| ENSG00000072818 | ACAP1      | 1.56E+00 | 6.72E-03 | 1.59E-02 |
| ENSG00000236094 | LINC00545  | 4.48E+00 | 6.74E-03 | 1.60E-02 |
| ENSG00000087076 | HSD17B14   | 1.10E+00 | 6.75E-03 | 1.60E-02 |
| ENSG00000278873 | AC005495.1 | 3.24E+00 | 6.76E-03 | 1.60E-02 |
| ENSG00000249087 | ZNF436-AS1 | 1.93E+00 | 6.79E-03 | 1.61E-02 |
| ENSG00000153012 | LGI2       | 3.44E+00 | 6.80E-03 | 1.61E-02 |
| ENSG00000224616 | RTCA-AS1   | 1.60E+00 | 6.83E-03 | 1.62E-02 |
| ENSG00000228010 | AC073343.2 | 4.50E+00 | 6.84E-03 | 1.62E-02 |
| ENSG00000183019 | MCEMP1     | 4.81E+00 | 6.85E-03 | 1.62E-02 |
| ENSG00000135063 | FAM189A2   | 3.63E+00 | 6.88E-03 | 1.63E-02 |
| ENSG00000165553 | NGB        | 3.66E+00 | 6.88E-03 | 1.63E-02 |
| ENSG00000223774 | AL513217.1 | 2.67E+00 | 6.96E-03 | 1.64E-02 |
| ENSG00000240922 | LSAMP-AS1  | 4.06E+00 | 6.97E-03 | 1.65E-02 |
| ENSG00000178403 | NEUROG2    | 4.95E+00 | 6.98E-03 | 1.65E-02 |
| ENSG00000163531 | NFASC      | 1.53E+00 | 6.98E-03 | 1.65E-02 |
| ENSG00000280303 | ERICD      | 2.65E+00 | 7.03E-03 | 1.66E-02 |
| ENSG00000268678 | AC005261.2 | 3.77E+00 | 7.07E-03 | 1.67E-02 |
| ENSG00000211454 | AKR7L      | 3.09E+00 | 7.08E-03 | 1.67E-02 |
| ENSG00000100302 | RASD2      | 1.72E+00 | 7.11E-03 | 1.67E-02 |
| ENSG00000042317 | SPATA7     | 1.29E+00 | 7.12E-03 | 1.68E-02 |
| ENSG00000185674 | LYG2       | 4.91E+00 | 7.18E-03 | 1.69E-02 |
| ENSG00000275479 | AC087741.2 | 3.00E+00 | 7.19E-03 | 1.69E-02 |
| ENSG00000164398 | ACSL6      | 4.19E+00 | 7.20E-03 | 1.69E-02 |
| ENSG00000073067 | CYP2W1     | 4.43E+00 | 7.22E-03 | 1.70E-02 |
| ENSG00000132522 | GPS2       | 1.17E+00 | 7.22E-03 | 1.70E-02 |
| ENSG00000152315 | KCNK13     | 2.94E+00 | 7.24E-03 | 1.70E-02 |
| ENSG00000142178 | SIK1       | 1.62E+00 | 7.24E-03 | 1.70E-02 |
| ENSG00000163817 | SLC6A20    | 2.21E+00 | 7.29E-03 | 1.71E-02 |
| ENSG00000274363 | AC087742.1 | 3.92E+00 | 7.35E-03 | 1.72E-02 |
| ENSG00000204315 | FKBPL      | 1.07E+00 | 7.43E-03 | 1.74E-02 |
| ENSG00000043591 | ADRB1      | 3.58E+00 | 7.48E-03 | 1.75E-02 |
| ENSG00000240038 | AMY2B      | 4.57E+00 | 7.50E-03 | 1.76E-02 |

|                 |             |          |          |          |
|-----------------|-------------|----------|----------|----------|
| ENSG00000170442 | KRT86       | 2.73E+00 | 7.52E-03 | 1.76E-02 |
| ENSG00000188681 | TEKT4P2     | 1.08E+00 | 7.55E-03 | 1.77E-02 |
| ENSG00000168491 | CCDC110     | 3.43E+00 | 7.56E-03 | 1.77E-02 |
| ENSG00000182568 | SATB1       | 4.69E+00 | 7.60E-03 | 1.78E-02 |
| ENSG00000251131 | AC025171.3  | 1.60E+00 | 7.60E-03 | 1.78E-02 |
| ENSG00000155085 | AK9         | 1.18E+00 | 7.63E-03 | 1.78E-02 |
| ENSG00000177459 | ERICH5      | 1.27E+00 | 7.64E-03 | 1.79E-02 |
| ENSG00000287918 | AF274853.1  | 3.77E+00 | 7.69E-03 | 1.80E-02 |
| ENSG00000123191 | ATP7B       | 2.13E+00 | 7.80E-03 | 1.82E-02 |
| ENSG00000105642 | KCNN1       | 1.64E+00 | 7.81E-03 | 1.82E-02 |
| ENSG00000141401 | IMPA2       | 1.13E+00 | 7.83E-03 | 1.83E-02 |
| ENSG00000095370 | SH2D3C      | 2.39E+00 | 7.96E-03 | 1.85E-02 |
| ENSG00000162825 | NBPF20      | 1.10E+00 | 8.00E-03 | 1.86E-02 |
| ENSG00000226094 | RPL7P3      | 4.51E+00 | 8.04E-03 | 1.87E-02 |
| ENSG00000246777 | AC044802.1  | 1.52E+00 | 8.07E-03 | 1.88E-02 |
| ENSG00000246526 | LINC002481  | 3.71E+00 | 8.08E-03 | 1.88E-02 |
| ENSG00000272009 | AL121944.1  | 1.89E+00 | 8.09E-03 | 1.88E-02 |
| ENSG00000255100 | AP003119.2  | 2.42E+00 | 8.09E-03 | 1.88E-02 |
| ENSG00000225465 | RFPL1S      | 4.23E+00 | 8.10E-03 | 1.88E-02 |
| ENSG00000186191 | BPIFB4      | 3.88E+00 | 8.13E-03 | 1.89E-02 |
| ENSG00000179314 | WSCD1       | 4.50E+00 | 8.28E-03 | 1.92E-02 |
| ENSG00000114638 | UPK1B       | 4.60E+00 | 8.29E-03 | 1.92E-02 |
| ENSG00000197859 | ADAMTSL2    | 4.29E+00 | 8.32E-03 | 1.93E-02 |
| ENSG00000099869 | IGF2-AS     | 3.64E+00 | 8.35E-03 | 1.93E-02 |
| ENSG00000149654 | CDH22       | 4.27E+00 | 8.37E-03 | 1.94E-02 |
| ENSG00000182912 | TSPEAR-AS2  | 4.29E+00 | 8.39E-03 | 1.94E-02 |
| ENSG00000174498 | IGDCC3      | 3.06E+00 | 8.49E-03 | 1.96E-02 |
| ENSG00000177398 | UMODL1      | 4.25E+00 | 8.50E-03 | 1.96E-02 |
| ENSG00000186510 | CLCNKA      | 3.91E+00 | 8.53E-03 | 1.97E-02 |
| ENSG00000270179 | AP002840.2  | 4.06E+00 | 8.55E-03 | 1.97E-02 |
| ENSG00000273010 | AL360270.3  | 4.11E+00 | 8.56E-03 | 1.98E-02 |
| ENSG00000189233 | NUGGC       | 3.70E+00 | 8.58E-03 | 1.98E-02 |
| ENSG00000149243 | KLHL35      | 4.05E+00 | 8.60E-03 | 1.98E-02 |
| ENSG00000272636 | DOC2B       | 2.38E+00 | 8.64E-03 | 1.99E-02 |
| ENSG00000267750 | RUNDC3A-AS1 | 2.23E+00 | 8.77E-03 | 2.02E-02 |
| ENSG00000279649 | AC020978.9  | 4.03E+00 | 8.80E-03 | 2.03E-02 |
| ENSG00000132874 | SLC14A2     | 4.58E+00 | 8.84E-03 | 2.04E-02 |
| ENSG00000197632 | SERPINB2    | 1.21E+00 | 8.90E-03 | 2.05E-02 |
| ENSG00000112320 | SOBP        | 1.38E+00 | 8.95E-03 | 2.06E-02 |
| ENSG00000259100 | AL157791.1  | 3.85E+00 | 8.96E-03 | 2.06E-02 |
| ENSG00000197576 | HOXA4       | 1.94E+00 | 9.03E-03 | 2.07E-02 |
| ENSG00000134627 | PIWIL4      | 3.52E+00 | 9.04E-03 | 2.08E-02 |
| ENSG00000280239 | AC011498.7  | 1.53E+00 | 9.06E-03 | 2.08E-02 |
| ENSG00000146215 | CRIP3       | 3.56E+00 | 9.07E-03 | 2.08E-02 |
| ENSG00000196357 | ZNF565      | 1.12E+00 | 9.09E-03 | 2.09E-02 |

|                 |            |          |          |          |
|-----------------|------------|----------|----------|----------|
| ENSG00000267719 | LINC02078  | 3.99E+00 | 9.10E-03 | 2.09E-02 |
| ENSG00000049769 | PPP1R3F    | 1.10E+00 | 9.14E-03 | 2.10E-02 |
| ENSG00000261543 | AC010931.3 | 3.95E+00 | 9.16E-03 | 2.10E-02 |
| ENSG00000161040 | FBXL13     | 1.98E+00 | 9.17E-03 | 2.10E-02 |
| ENSG00000069764 | PLA2G10    | 4.32E+00 | 9.19E-03 | 2.11E-02 |
| ENSG00000162461 | SLC25A34   | 2.12E+00 | 9.24E-03 | 2.12E-02 |
| ENSG00000136931 | NR5A1      | 3.74E+00 | 9.26E-03 | 2.12E-02 |
| ENSG00000285848 | AC025280.3 | 3.83E+00 | 9.26E-03 | 2.12E-02 |
| ENSG00000161270 | NPHS1      | 4.00E+00 | 9.27E-03 | 2.12E-02 |
| ENSG00000027869 | SH2D2A     | 3.06E+00 | 9.34E-03 | 2.14E-02 |
| ENSG00000141441 | GAREM1     | 2.00E+00 | 9.39E-03 | 2.15E-02 |
| ENSG00000132793 | LPIN3      | 1.96E+00 | 9.46E-03 | 2.16E-02 |
| ENSG00000205085 | FAM71F2    | 3.89E+00 | 9.47E-03 | 2.16E-02 |
| ENSG00000279361 | AC079331.1 | 3.33E+00 | 9.48E-03 | 2.17E-02 |
| ENSG00000175104 | TRAF6      | 1.08E+00 | 9.55E-03 | 2.18E-02 |
| ENSG00000214827 | MTCP1      | 2.68E+00 | 9.59E-03 | 2.19E-02 |
| ENSG00000284669 | AC092053.3 | 4.02E+00 | 9.61E-03 | 2.19E-02 |
| ENSG00000206190 | ATP10A     | 4.98E+00 | 9.61E-03 | 2.19E-02 |
| ENSG00000252835 | SCARNA21   | 3.19E+00 | 9.67E-03 | 2.20E-02 |
| ENSG00000224186 | C5orf66    | 2.91E+00 | 9.67E-03 | 2.20E-02 |
| ENSG00000132698 | RAB25      | 4.08E+00 | 9.71E-03 | 2.21E-02 |
| ENSG00000184347 | SLIT3      | 1.80E+00 | 9.75E-03 | 2.22E-02 |
| ENSG00000135447 | PPP1R1A    | 4.65E+00 | 9.85E-03 | 2.24E-02 |
| ENSG00000277476 | AC005332.5 | 2.64E+00 | 9.87E-03 | 2.24E-02 |
| ENSG00000204257 | HLA-DMA    | 2.41E+00 | 9.88E-03 | 2.25E-02 |
| ENSG00000205593 | DENND6B    | 1.50E+00 | 9.95E-03 | 2.26E-02 |
| ENSG00000117707 | PROX1      | 4.52E+00 | 9.96E-03 | 2.26E-02 |
| ENSG00000234618 | RPSAP9     | 3.14E+00 | 9.97E-03 | 2.26E-02 |
| ENSG00000154485 | MMP21      | 3.63E+00 | 1.01E-02 | 2.29E-02 |
| ENSG00000235214 | FAM83C-AS1 | 4.20E+00 | 1.01E-02 | 2.30E-02 |
| ENSG00000227741 | AL121987.2 | 4.57E+00 | 1.02E-02 | 2.30E-02 |
| ENSG00000160963 | COL26A1    | 4.19E+00 | 1.02E-02 | 2.31E-02 |
| ENSG00000187583 | PLEKHN1    | 1.01E+00 | 1.02E-02 | 2.31E-02 |
| ENSG00000198915 | RASGEF1A   | 3.71E+00 | 1.02E-02 | 2.31E-02 |
| ENSG00000167011 | NAT16      | 2.54E+00 | 1.02E-02 | 2.32E-02 |
| ENSG00000249346 | LINC01016  | 3.99E+00 | 1.03E-02 | 2.32E-02 |
| ENSG00000174407 | MIR1-1HG   | 4.73E+00 | 1.03E-02 | 2.32E-02 |
| ENSG00000228278 | ORM2       | 4.73E+00 | 1.03E-02 | 2.33E-02 |
| ENSG00000186919 | ZACN       | 3.51E+00 | 1.03E-02 | 2.34E-02 |
| ENSG00000132702 | HAPLN2     | 4.07E+00 | 1.03E-02 | 2.34E-02 |
| ENSG00000267288 | AC138150.2 | 3.06E+00 | 1.03E-02 | 2.34E-02 |
| ENSG00000143434 | SEMA6C     | 1.05E+00 | 1.04E-02 | 2.34E-02 |
| ENSG00000283390 | AC068631.3 | 1.30E+00 | 1.04E-02 | 2.34E-02 |
| ENSG00000237187 | NR2F1-AS1  | 1.47E+00 | 1.04E-02 | 2.36E-02 |
| ENSG00000279140 | AL590326.1 | 1.26E+00 | 1.05E-02 | 2.36E-02 |

|                 |            |          |          |          |
|-----------------|------------|----------|----------|----------|
| ENSG00000081148 | IMPG2      | 4.12E+00 | 1.05E-02 | 2.36E-02 |
| ENSG00000181031 | RPH3AL     | 2.17E+00 | 1.05E-02 | 2.37E-02 |
| ENSG00000175697 | GPR156     | 3.16E+00 | 1.05E-02 | 2.38E-02 |
| ENSG00000272449 | AL139246.5 | 3.13E+00 | 1.05E-02 | 2.38E-02 |
| ENSG00000273297 | AC009275.1 | 1.27E+00 | 1.06E-02 | 2.39E-02 |
| ENSG00000273226 | AL391834.2 | 3.40E+00 | 1.06E-02 | 2.39E-02 |
| ENSG00000139910 | NOVA1      | 3.30E+00 | 1.07E-02 | 2.40E-02 |
| ENSG00000207751 | AP000553.1 | 3.57E+00 | 1.07E-02 | 2.41E-02 |
| ENSG00000002746 | HECW1      | 1.45E+00 | 1.07E-02 | 2.41E-02 |
| ENSG00000106004 | HOXA5      | 1.07E+00 | 1.07E-02 | 2.41E-02 |
| ENSG00000268583 | AC011466.1 | 2.16E+00 | 1.07E-02 | 2.41E-02 |
| ENSG00000149212 | SESN3      | 3.04E+00 | 1.08E-02 | 2.43E-02 |
| ENSG00000223903 | RPL23P4    | 3.32E+00 | 1.09E-02 | 2.44E-02 |
| ENSG00000285646 | AL021155.5 | 2.22E+00 | 1.09E-02 | 2.46E-02 |
| ENSG00000103241 | FOXF1      | 1.17E+00 | 1.10E-02 | 2.46E-02 |
| ENSG00000080007 | DDX43      | 4.69E+00 | 1.10E-02 | 2.47E-02 |
| ENSG00000189129 | PLAC9      | 1.94E+00 | 1.10E-02 | 2.47E-02 |
| ENSG00000149927 | DOC2A      | 1.32E+00 | 1.11E-02 | 2.49E-02 |
| ENSG00000182950 | ODF3L1     | 3.06E+00 | 1.11E-02 | 2.49E-02 |
| ENSG00000122679 | RAMP3      | 3.69E+00 | 1.12E-02 | 2.51E-02 |
| ENSG00000204344 | STK19      | 1.11E+00 | 1.12E-02 | 2.51E-02 |
| ENSG00000241735 | FABP5P3    | 4.03E+00 | 1.12E-02 | 2.51E-02 |
| ENSG00000214548 | MEG3       | 4.05E+00 | 1.13E-02 | 2.52E-02 |
| ENSG00000183150 | GPR19      | 3.16E+00 | 1.13E-02 | 2.52E-02 |
| ENSG00000271980 | AC012640.4 | 3.94E+00 | 1.13E-02 | 2.53E-02 |
| ENSG00000263080 | AC009121.3 | 3.41E+00 | 1.13E-02 | 2.53E-02 |
| ENSG00000178222 | RNF212     | 4.82E+00 | 1.14E-02 | 2.54E-02 |
| ENSG00000140022 | STON2      | 1.92E+00 | 1.14E-02 | 2.55E-02 |
| ENSG00000262370 | AC108134.3 | 4.22E+00 | 1.14E-02 | 2.55E-02 |
| ENSG00000156042 | CFAP70     | 3.17E+00 | 1.14E-02 | 2.55E-02 |
| ENSG00000165643 | SOHLH1     | 4.59E+00 | 1.16E-02 | 2.58E-02 |
| ENSG00000169228 | RAB24      | 2.38E+00 | 1.16E-02 | 2.60E-02 |
| ENSG00000166407 | LMO1       | 2.48E+00 | 1.17E-02 | 2.61E-02 |
| ENSG00000177875 | CCDC184    | 4.40E+00 | 1.17E-02 | 2.61E-02 |
| ENSG00000146250 | PRSS35     | 2.28E+00 | 1.17E-02 | 2.61E-02 |
| ENSG00000185652 | NTF3       | 4.66E+00 | 1.17E-02 | 2.61E-02 |
| ENSG00000248445 | SEMA6A-AS1 | 2.93E+00 | 1.18E-02 | 2.63E-02 |
| ENSG00000261652 | C15orf65   | 2.13E+00 | 1.19E-02 | 2.65E-02 |
| ENSG00000145824 | CXCL14     | 2.70E+00 | 1.20E-02 | 2.66E-02 |
| ENSG00000249550 | LINC01234  | 3.08E+00 | 1.20E-02 | 2.67E-02 |
| ENSG00000198771 | RCSD1      | 3.14E+00 | 1.20E-02 | 2.68E-02 |
| ENSG00000229414 | KCNQ1-AS1  | 4.09E+00 | 1.22E-02 | 2.71E-02 |
| ENSG00000132623 | ANKEF1     | 1.23E+00 | 1.23E-02 | 2.72E-02 |
| ENSG00000286619 | AC119673.2 | 3.72E+00 | 1.24E-02 | 2.74E-02 |
| ENSG00000177238 | TRIM72     | 3.72E+00 | 1.24E-02 | 2.76E-02 |

|                 |              |          |          |          |
|-----------------|--------------|----------|----------|----------|
| ENSG00000285872 | AC007240.3   | 3.06E+00 | 1.24E-02 | 2.76E-02 |
| ENSG00000213901 | SLC23A3      | 2.17E+00 | 1.25E-02 | 2.76E-02 |
| ENSG00000124253 | PCK1         | 4.36E+00 | 1.25E-02 | 2.78E-02 |
| ENSG00000132386 | SERPINF1     | 2.98E+00 | 1.26E-02 | 2.79E-02 |
| ENSG00000276952 | AL121772.3   | 1.77E+00 | 1.26E-02 | 2.79E-02 |
| ENSG00000117595 | IRF6         | 1.52E+00 | 1.26E-02 | 2.80E-02 |
| ENSG00000143226 | FCGR2A       | 2.73E+00 | 1.27E-02 | 2.80E-02 |
| ENSG00000088280 | ASAP3        | 1.03E+00 | 1.27E-02 | 2.80E-02 |
| ENSG00000172382 | PRSS27       | 1.01E+00 | 1.28E-02 | 2.82E-02 |
| ENSG00000233755 | AL050344.1   | 4.11E+00 | 1.28E-02 | 2.82E-02 |
| ENSG00000250271 | AC068647.2   | 2.09E+00 | 1.29E-02 | 2.85E-02 |
| ENSG00000148200 | NR6A1        | 1.04E+00 | 1.30E-02 | 2.86E-02 |
| ENSG00000186891 | TNFRSF18     | 3.53E+00 | 1.30E-02 | 2.87E-02 |
| ENSG00000279161 | AC093503.3   | 2.88E+00 | 1.30E-02 | 2.87E-02 |
| ENSG00000222035 | KIAA2012-AS1 | 3.04E+00 | 1.31E-02 | 2.88E-02 |
| ENSG00000136944 | LMX1B        | 1.84E+00 | 1.32E-02 | 2.90E-02 |
| ENSG00000214212 | C19orf38     | 2.15E+00 | 1.32E-02 | 2.90E-02 |
| ENSG00000100068 | LRP5L        | 1.51E+00 | 1.32E-02 | 2.90E-02 |
| ENSG00000251576 | LINC01267    | 3.78E+00 | 1.32E-02 | 2.91E-02 |
| ENSG00000128596 | CCDC136      | 1.08E+00 | 1.33E-02 | 2.93E-02 |
| ENSG00000226900 | AL451069.1   | 4.07E+00 | 1.33E-02 | 2.93E-02 |
| ENSG00000144671 | SLC22A14     | 2.99E+00 | 1.34E-02 | 2.95E-02 |
| ENSG00000264569 | DCXR-DT      | 3.24E+00 | 1.34E-02 | 2.96E-02 |
| ENSG00000143355 | LHX9         | 2.35E+00 | 1.35E-02 | 2.97E-02 |
| ENSG00000285867 | BX470102.2   | 3.37E+00 | 1.36E-02 | 2.98E-02 |
| ENSG00000100678 | SLC8A3       | 3.64E+00 | 1.36E-02 | 2.99E-02 |
| ENSG00000132026 | RTBDN        | 3.21E+00 | 1.36E-02 | 2.99E-02 |
| ENSG00000271858 | CYB561D2     | 4.53E+00 | 1.37E-02 | 3.00E-02 |
| ENSG00000157927 | RADIL        | 1.49E+00 | 1.37E-02 | 3.00E-02 |
| ENSG00000227053 | AC105446.1   | 1.46E+00 | 1.38E-02 | 3.03E-02 |
| ENSG00000269578 | AC008764.7   | 2.08E+00 | 1.38E-02 | 3.04E-02 |
| ENSG00000223745 | CCDC18-AS1   | 1.44E+00 | 1.39E-02 | 3.04E-02 |
| ENSG00000257335 | MGAM         | 4.03E+00 | 1.39E-02 | 3.04E-02 |
| ENSG00000256448 | AP000763.3   | 3.32E+00 | 1.39E-02 | 3.04E-02 |
| ENSG00000241081 | RPL22P2      | 2.52E+00 | 1.40E-02 | 3.07E-02 |
| ENSG00000105697 | HAMP         | 4.28E+00 | 1.40E-02 | 3.07E-02 |
| ENSG00000271849 | AC012603.1   | 4.31E+00 | 1.40E-02 | 3.07E-02 |
| ENSG00000219626 | FAM228B      | 1.50E+00 | 1.41E-02 | 3.09E-02 |
| ENSG00000167046 | AL357033.1   | 3.72E+00 | 1.41E-02 | 3.09E-02 |
| ENSG00000253667 | AC100821.1   | 2.55E+00 | 1.41E-02 | 3.09E-02 |
| ENSG00000281406 | BLACAT1      | 4.04E+00 | 1.42E-02 | 3.09E-02 |
| ENSG00000100593 | ISM2         | 2.60E+00 | 1.42E-02 | 3.09E-02 |
| ENSG00000187889 | FYB2         | 4.51E+00 | 1.42E-02 | 3.10E-02 |
| ENSG00000273136 | NBPF26       | 1.91E+00 | 1.43E-02 | 3.11E-02 |
| ENSG00000274828 | AC068473.5   | 1.08E+00 | 1.44E-02 | 3.13E-02 |

|                 |             |          |          |          |
|-----------------|-------------|----------|----------|----------|
| ENSG00000142583 | SLC2A5      | 2.65E+00 | 1.44E-02 | 3.15E-02 |
| ENSG00000166762 | CATSPER2    | 1.37E+00 | 1.45E-02 | 3.16E-02 |
| ENSG00000226338 | AC079150.1  | 1.05E+00 | 1.46E-02 | 3.19E-02 |
| ENSG00000139194 | RBP5        | 3.49E+00 | 1.47E-02 | 3.19E-02 |
| ENSG00000225193 | RPS12P26    | 2.10E+00 | 1.48E-02 | 3.22E-02 |
| ENSG00000273599 | AL731571.1  | 3.37E+00 | 1.49E-02 | 3.25E-02 |
| ENSG00000091428 | RAPGEF4     | 2.12E+00 | 1.49E-02 | 3.25E-02 |
| ENSG00000232080 | AL662789.1  | 4.14E+00 | 1.49E-02 | 3.25E-02 |
| ENSG00000174529 | TMEM81      | 1.55E+00 | 1.50E-02 | 3.25E-02 |
| ENSG00000176919 | C8G         | 2.16E+00 | 1.50E-02 | 3.25E-02 |
| ENSG00000276250 | AC127024.6  | 3.46E+00 | 1.50E-02 | 3.25E-02 |
| ENSG00000286532 | PARTICL     | 1.36E+00 | 1.51E-02 | 3.27E-02 |
| ENSG00000214915 | BX546450.1  | 4.35E+00 | 1.51E-02 | 3.28E-02 |
| ENSG00000087250 | MT3         | 3.79E+00 | 1.52E-02 | 3.29E-02 |
| ENSG00000158104 | HPD         | 3.48E+00 | 1.52E-02 | 3.29E-02 |
| ENSG00000227373 | RABGAP1L-DT | 3.33E+00 | 1.52E-02 | 3.29E-02 |
| ENSG00000166105 | GLB1L3      | 1.65E+00 | 1.52E-02 | 3.29E-02 |
| ENSG00000206113 | CFAP99      | 4.27E+00 | 1.52E-02 | 3.30E-02 |
| ENSG00000141639 | MAPK4       | 4.11E+00 | 1.53E-02 | 3.30E-02 |
| ENSG00000255120 | OVOL1-AS1   | 4.24E+00 | 1.53E-02 | 3.31E-02 |
| ENSG00000286699 | AC084198.2  | 2.40E+00 | 1.54E-02 | 3.33E-02 |
| ENSG00000226088 | AL158839.1  | 3.85E+00 | 1.54E-02 | 3.34E-02 |
| ENSG00000172000 | ZNF556      | 3.55E+00 | 1.54E-02 | 3.34E-02 |
| ENSG00000261335 | AC005837.1  | 2.48E+00 | 1.55E-02 | 3.34E-02 |
| ENSG00000287808 | AL355999.1  | 4.28E+00 | 1.55E-02 | 3.35E-02 |
| ENSG00000122733 | PHF24       | 2.77E+00 | 1.58E-02 | 3.42E-02 |
| ENSG00000287710 | AC067852.5  | 1.48E+00 | 1.59E-02 | 3.43E-02 |
| ENSG00000101306 | MYLK2       | 1.32E+00 | 1.59E-02 | 3.43E-02 |
| ENSG00000132677 | RHBG        | 3.90E+00 | 1.60E-02 | 3.44E-02 |
| ENSG00000277602 | AC005363.2  | 1.81E+00 | 1.60E-02 | 3.44E-02 |
| ENSG00000237452 | BHMG1       | 3.75E+00 | 1.61E-02 | 3.46E-02 |
| ENSG00000185973 | TMLHE       | 1.33E+00 | 1.61E-02 | 3.46E-02 |
| ENSG00000204947 | ZNF425      | 1.26E+00 | 1.61E-02 | 3.46E-02 |
| ENSG00000163072 | NOSTRIN     | 2.63E+00 | 1.62E-02 | 3.49E-02 |
| ENSG00000111671 | SPSB2       | 1.25E+00 | 1.63E-02 | 3.49E-02 |
| ENSG00000113196 | HAND1       | 4.30E+00 | 1.64E-02 | 3.52E-02 |
| ENSG00000116774 | OLFML3      | 1.84E+00 | 1.65E-02 | 3.53E-02 |
| ENSG00000132622 | HSPA12B     | 4.33E+00 | 1.65E-02 | 3.55E-02 |
| ENSG00000271882 | AP001330.4  | 2.33E+00 | 1.66E-02 | 3.56E-02 |
| ENSG00000123999 | INHA        | 2.68E+00 | 1.66E-02 | 3.56E-02 |
| ENSG00000156206 | CFAP161     | 4.22E+00 | 1.66E-02 | 3.56E-02 |
| ENSG00000272375 | AC026979.3  | 3.28E+00 | 1.66E-02 | 3.57E-02 |
| ENSG00000198208 | RPS6KL1     | 3.25E+00 | 1.67E-02 | 3.57E-02 |
| ENSG00000165457 | FOLR2       | 4.15E+00 | 1.67E-02 | 3.58E-02 |
| ENSG00000233654 | AC108047.1  | 1.06E+00 | 1.67E-02 | 3.58E-02 |

|                 |            |          |          |          |
|-----------------|------------|----------|----------|----------|
| ENSG00000188868 | ZNF563     | 1.02E+00 | 1.67E-02 | 3.59E-02 |
| ENSG00000260064 | AC092332.1 | 4.41E+00 | 1.67E-02 | 3.59E-02 |
| ENSG00000258891 | AC005480.1 | 3.86E+00 | 1.68E-02 | 3.59E-02 |
| ENSG00000272953 | AC092171.4 | 2.82E+00 | 1.68E-02 | 3.59E-02 |
| ENSG00000255931 | AP003108.1 | 4.21E+00 | 1.68E-02 | 3.60E-02 |
| ENSG00000101441 | CST4       | 3.72E+00 | 1.69E-02 | 3.60E-02 |
| ENSG00000136695 | IL36RN     | 4.51E+00 | 1.69E-02 | 3.60E-02 |
| ENSG00000182931 | WFDC10B    | 1.73E+00 | 1.69E-02 | 3.60E-02 |
| ENSG00000241088 | RPL17P44   | 4.48E+00 | 1.69E-02 | 3.60E-02 |
| ENSG00000125731 | SH2D3A     | 3.48E+00 | 1.70E-02 | 3.63E-02 |
| ENSG00000232079 | LINC01697  | 3.75E+00 | 1.70E-02 | 3.64E-02 |
| ENSG00000272787 | AC253536.6 | 2.25E+00 | 1.71E-02 | 3.64E-02 |
| ENSG00000281548 | LINC00895  | 4.16E+00 | 1.71E-02 | 3.65E-02 |
| ENSG00000084710 | EFR3B      | 1.47E+00 | 1.72E-02 | 3.67E-02 |
| ENSG00000196074 | SYCP2      | 1.18E+00 | 1.72E-02 | 3.68E-02 |
| ENSG00000168878 | SFTPB      | 4.62E+00 | 1.73E-02 | 3.69E-02 |
| ENSG00000077984 | CST7       | 4.08E+00 | 1.73E-02 | 3.70E-02 |
| ENSG00000205922 | ONECUT3    | 2.56E+00 | 1.74E-02 | 3.71E-02 |
| ENSG00000168356 | SCN11A     | 3.53E+00 | 1.74E-02 | 3.71E-02 |
| ENSG00000175567 | UCP2       | 1.07E+00 | 1.74E-02 | 3.72E-02 |
| ENSG00000163235 | TGFA       | 2.34E+00 | 1.75E-02 | 3.72E-02 |
| ENSG00000151090 | THRB       | 2.54E+00 | 1.75E-02 | 3.72E-02 |
| ENSG00000259985 | AC017100.1 | 2.23E+00 | 1.76E-02 | 3.74E-02 |
| ENSG00000188981 | MSANTD1    | 1.98E+00 | 1.76E-02 | 3.74E-02 |
| ENSG00000271913 | AL035530.2 | 2.82E+00 | 1.77E-02 | 3.75E-02 |
| ENSG00000179406 | LINC00174  | 1.59E+00 | 1.77E-02 | 3.76E-02 |
| ENSG00000260926 | AC016134.1 | 3.42E+00 | 1.77E-02 | 3.76E-02 |
| ENSG00000271754 | AL355802.3 | 1.61E+00 | 1.77E-02 | 3.77E-02 |
| ENSG00000139970 | RTN1       | 3.19E+00 | 1.77E-02 | 3.77E-02 |
| ENSG00000166948 | TGM6       | 4.09E+00 | 1.78E-02 | 3.78E-02 |
| ENSG00000280138 | AC027290.2 | 1.21E+00 | 1.78E-02 | 3.78E-02 |
| ENSG00000273204 | AC104506.1 | 1.52E+00 | 1.78E-02 | 3.79E-02 |
| ENSG00000104826 | LHB        | 3.02E+00 | 1.79E-02 | 3.80E-02 |
| ENSG00000130045 | NXNL2      | 1.50E+00 | 1.79E-02 | 3.80E-02 |
| ENSG00000227110 | LMCD1-AS1  | 2.45E+00 | 1.79E-02 | 3.80E-02 |
| ENSG00000142661 | MYOM3      | 4.38E+00 | 1.79E-02 | 3.80E-02 |
| ENSG00000041353 | RAB27B     | 1.14E+00 | 1.80E-02 | 3.81E-02 |
| ENSG00000204666 | AC010624.1 | 2.15E+00 | 1.80E-02 | 3.81E-02 |
| ENSG00000151136 | BTBD11     | 2.52E+00 | 1.80E-02 | 3.82E-02 |
| ENSG00000237788 | AL162615.1 | 2.70E+00 | 1.81E-02 | 3.83E-02 |
| ENSG00000249307 | LINC01088  | 2.96E+00 | 1.82E-02 | 3.85E-02 |
| ENSG00000106804 | C5         | 2.10E+00 | 1.82E-02 | 3.85E-02 |
| ENSG00000267535 | LINC00868  | 4.08E+00 | 1.82E-02 | 3.85E-02 |
| ENSG00000127415 | IDUA       | 1.38E+00 | 1.82E-02 | 3.86E-02 |
| ENSG00000161031 | PGLYRP2    | 4.01E+00 | 1.82E-02 | 3.86E-02 |



|                 |             |          |          |          |
|-----------------|-------------|----------|----------|----------|
| ENSG00000142224 | IL19        | 4.48E+00 | 1.82E-02 | 3.86E-02 |
| ENSG00000163491 | NEK10       | 1.76E+00 | 1.84E-02 | 3.88E-02 |
| ENSG00000164619 | BMPER       | 1.09E+00 | 1.84E-02 | 3.88E-02 |
| ENSG00000228643 | AC079779.2  | 2.42E+00 | 1.84E-02 | 3.88E-02 |
| ENSG00000053108 | FSTL4       | 4.03E+00 | 1.84E-02 | 3.89E-02 |
| ENSG00000227885 | AL590652.1  | 2.92E+00 | 1.85E-02 | 3.90E-02 |
| ENSG00000282961 | PRNCR1      | 1.84E+00 | 1.86E-02 | 3.92E-02 |
| ENSG00000241170 | AP001992.1  | 1.42E+00 | 1.87E-02 | 3.94E-02 |
| ENSG00000285664 | AL139317.5  | 3.23E+00 | 1.88E-02 | 3.95E-02 |
| ENSG00000273271 | AP000254.2  | 2.20E+00 | 1.88E-02 | 3.96E-02 |
| ENSG00000136250 | AOAH        | 3.54E+00 | 1.88E-02 | 3.96E-02 |
| ENSG00000157856 | DRC1        | 3.17E+00 | 1.88E-02 | 3.96E-02 |
| ENSG00000153495 | TEX29       | 1.74E+00 | 1.88E-02 | 3.96E-02 |
| ENSG00000167800 | TBX10       | 4.42E+00 | 1.89E-02 | 3.97E-02 |
| ENSG00000249915 | PDCD6       | 1.19E+00 | 1.90E-02 | 4.00E-02 |
| ENSG00000260081 | AF274858.1  | 1.46E+00 | 1.90E-02 | 4.01E-02 |
| ENSG00000281100 | AC105749.1  | 4.21E+00 | 1.91E-02 | 4.03E-02 |
| ENSG00000174514 | MFSD4A      | 3.03E+00 | 1.92E-02 | 4.04E-02 |
| ENSG00000162975 | KCNF1       | 2.93E+00 | 1.93E-02 | 4.06E-02 |
| ENSG00000134215 | VAV3        | 1.47E+00 | 1.95E-02 | 4.10E-02 |
| ENSG00000235527 | HIPK1-AS1   | 2.89E+00 | 1.96E-02 | 4.11E-02 |
| ENSG00000256967 | AC018653.3  | 4.53E+00 | 1.97E-02 | 4.13E-02 |
| ENSG00000145506 | NKD2        | 3.89E+00 | 1.98E-02 | 4.15E-02 |
| ENSG00000100385 | IL2RB       | 2.69E+00 | 2.01E-02 | 4.21E-02 |
| ENSG00000227533 | SLC2A1-AS1  | 2.69E+00 | 2.01E-02 | 4.21E-02 |
| ENSG00000280109 | PLAC4       | 4.64E+00 | 2.02E-02 | 4.22E-02 |
| ENSG00000286393 | Z97192.4    | 4.44E+00 | 2.02E-02 | 4.22E-02 |
| ENSG00000100053 | CRYBB3      | 3.65E+00 | 2.02E-02 | 4.22E-02 |
| ENSG00000252118 | RNU6ATAC39F | 4.47E+00 | 2.02E-02 | 4.23E-02 |
| ENSG00000259711 | AC106738.1  | 3.39E+00 | 2.03E-02 | 4.25E-02 |
| ENSG00000014914 | MTMR11      | 1.07E+00 | 2.04E-02 | 4.26E-02 |
| ENSG00000149531 | FRG1BP      | 1.23E+00 | 2.04E-02 | 4.26E-02 |
| ENSG00000213638 | ADAT3       | 2.05E+00 | 2.04E-02 | 4.27E-02 |
| ENSG00000268603 | AC053503.5  | 3.73E+00 | 2.05E-02 | 4.28E-02 |
| ENSG00000158486 | DNAH3       | 3.06E+00 | 2.07E-02 | 4.31E-02 |
| ENSG00000139946 | PELI2       | 3.36E+00 | 2.07E-02 | 4.32E-02 |
| ENSG00000273225 | FAM25BP     | 4.51E+00 | 2.07E-02 | 4.32E-02 |
| ENSG00000272518 | AC036214.2  | 1.26E+00 | 2.08E-02 | 4.33E-02 |
| ENSG00000204531 | POU5F1      | 3.97E+00 | 2.09E-02 | 4.36E-02 |
| ENSG00000099866 | MADCAM1     | 1.49E+00 | 2.09E-02 | 4.36E-02 |
| ENSG00000164695 | CHMP4C      | 2.24E+00 | 2.09E-02 | 4.36E-02 |
| ENSG00000180383 | DEFB124     | 5.07E+00 | 2.10E-02 | 4.37E-02 |
| ENSG00000237773 | AC073332.1  | 1.80E+00 | 2.10E-02 | 4.38E-02 |
| ENSG00000267940 | AC022762.2  | 2.22E+00 | 2.11E-02 | 4.39E-02 |
| ENSG00000163794 | UCN         | 2.24E+00 | 2.11E-02 | 4.39E-02 |

|                 |            |          |          |          |
|-----------------|------------|----------|----------|----------|
| ENSG00000171517 | LPAR3      | 1.47E+00 | 2.11E-02 | 4.39E-02 |
| ENSG00000011083 | SLC6A7     | 4.28E+00 | 2.11E-02 | 4.39E-02 |
| ENSG00000250371 | AC007370.2 | 2.97E+00 | 2.11E-02 | 4.40E-02 |
| ENSG00000267280 | TBX2-AS1   | 1.27E+00 | 2.12E-02 | 4.41E-02 |
| ENSG00000079482 | OPHN1      | 1.26E+00 | 2.12E-02 | 4.41E-02 |
| ENSG00000004948 | CALCR      | 4.83E+00 | 2.15E-02 | 4.46E-02 |
| ENSG00000263335 | AF001548.2 | 1.73E+00 | 2.15E-02 | 4.47E-02 |
| ENSG00000207003 | RNU6-611P  | 2.87E+00 | 2.17E-02 | 4.50E-02 |
| ENSG00000226179 | LINC00685  | 1.25E+00 | 2.17E-02 | 4.50E-02 |
| ENSG00000225655 | BX255923.1 | 2.40E+00 | 2.17E-02 | 4.50E-02 |
| ENSG00000269313 | MAGIX      | 1.82E+00 | 2.19E-02 | 4.54E-02 |
| ENSG00000267453 | CLEC4O     | 4.21E+00 | 2.19E-02 | 4.54E-02 |
| ENSG00000216490 | IFI30      | 2.03E+00 | 2.20E-02 | 4.56E-02 |
| ENSG00000162426 | SLC45A1    | 2.34E+00 | 2.20E-02 | 4.56E-02 |
| ENSG00000256625 | AC092747.2 | 1.53E+00 | 2.21E-02 | 4.57E-02 |
| ENSG00000272341 | AL137003.2 | 1.41E+00 | 2.22E-02 | 4.58E-02 |
| ENSG00000287510 | AL137857.1 | 3.17E+00 | 2.22E-02 | 4.59E-02 |
| ENSG00000128815 | WDFY4      | 4.33E+00 | 2.23E-02 | 4.61E-02 |
| ENSG00000008056 | SYN1       | 1.88E+00 | 2.25E-02 | 4.65E-02 |
| ENSG00000172345 | STARD5     | 1.86E+00 | 2.26E-02 | 4.66E-02 |
| ENSG00000235978 | AC018816.1 | 1.81E+00 | 2.26E-02 | 4.66E-02 |
| ENSG00000236753 | MKLN1-AS   | 1.08E+00 | 2.28E-02 | 4.70E-02 |
| ENSG00000261087 | AP003469.4 | 1.84E+00 | 2.29E-02 | 4.72E-02 |
| ENSG00000121101 | TEX14      | 2.37E+00 | 2.29E-02 | 4.72E-02 |
| ENSG00000154102 | C16orf74   | 1.22E+00 | 2.29E-02 | 4.73E-02 |
| ENSG00000157782 | CABP1      | 2.54E+00 | 2.30E-02 | 4.73E-02 |
| ENSG00000142748 | FCN3       | 3.48E+00 | 2.30E-02 | 4.74E-02 |
| ENSG00000005844 | ITGAL      | 3.96E+00 | 2.31E-02 | 4.76E-02 |
| ENSG00000267279 | AC090409.1 | 3.93E+00 | 2.32E-02 | 4.76E-02 |
| ENSG00000230131 | LINC02641  | 2.96E+00 | 2.32E-02 | 4.76E-02 |
| ENSG00000154263 | ABCA10     | 1.98E+00 | 2.32E-02 | 4.78E-02 |
| ENSG00000203593 | AC005342.1 | 4.05E+00 | 2.33E-02 | 4.79E-02 |
| ENSG00000253183 | AC005531.1 | 4.13E+00 | 2.33E-02 | 4.79E-02 |
| ENSG00000157423 | HYDIN      | 2.68E+00 | 2.33E-02 | 4.79E-02 |
| ENSG00000224846 | AL133351.1 | 2.26E+00 | 2.33E-02 | 4.79E-02 |
| ENSG00000171532 | NEUROD2    | 3.29E+00 | 2.34E-02 | 4.81E-02 |
| ENSG00000234807 | LINC01135  | 3.56E+00 | 2.34E-02 | 4.81E-02 |
| ENSG00000109943 | CRTAM      | 3.33E+00 | 2.34E-02 | 4.81E-02 |
| ENSG00000159247 | TUBBP5     | 4.37E+00 | 2.34E-02 | 4.82E-02 |
| ENSG00000204482 | LST1       | 2.22E+00 | 2.35E-02 | 4.82E-02 |
| ENSG00000286563 | AC078983.1 | 3.07E+00 | 2.35E-02 | 4.82E-02 |
| ENSG00000261730 | AL034346.1 | 3.00E+00 | 2.35E-02 | 4.82E-02 |
| ENSG00000176928 | GCNT4      | 2.59E+00 | 2.35E-02 | 4.83E-02 |
| ENSG00000275441 | AC020765.2 | 1.36E+00 | 2.36E-02 | 4.84E-02 |
| ENSG00000188620 | HMX3       | 4.21E+00 | 2.36E-02 | 4.85E-02 |

|                 |            |          |          |          |
|-----------------|------------|----------|----------|----------|
| ENSG00000179528 | LBX2       | 3.04E+00 | 2.39E-02 | 4.89E-02 |
| ENSG00000256037 | MRPL40P1   | 3.46E+00 | 2.39E-02 | 4.89E-02 |
| ENSG00000124116 | WFDC3      | 1.05E+00 | 2.40E-02 | 4.91E-02 |
| ENSG00000162777 | DENND2D    | 2.03E+00 | 2.40E-02 | 4.91E-02 |
| ENSG00000276259 | AC009118.3 | 2.39E+00 | 2.40E-02 | 4.92E-02 |
| ENSG00000125910 | S1PR4      | 4.47E+00 | 2.41E-02 | 4.92E-02 |
| ENSG00000204511 | MCCD1      | 3.86E+00 | 2.41E-02 | 4.93E-02 |
| ENSG00000135100 | HNF1A      | 3.62E+00 | 2.41E-02 | 4.94E-02 |
| ENSG00000259182 | AC019254.1 | 4.27E+00 | 2.41E-02 | 4.94E-02 |
| ENSG00000235750 | KIAA0040   | 4.16E+00 | 2.41E-02 | 4.94E-02 |
| ENSG00000172543 | CTSW       | 1.90E+00 | 2.42E-02 | 4.95E-02 |
| ENSG00000198342 | ZNF442     | 1.19E+00 | 2.44E-02 | 4.99E-02 |

**Supplementary table 10. Significant DRGs in Ad-KLF4 versus Ad-EGFP transduced samples on IL-1 $\beta$  stimulation.**

| Gene ID         | Gene name | Log2(FC)  | P value   | FDR       |
|-----------------|-----------|-----------|-----------|-----------|
| ENSG00000137801 | THBS1     | -4.16E+00 | 8.27E-168 | 5.63E-165 |
| ENSG00000115414 | FN1       | -3.07E+00 | 5.70E-166 | 3.61E-163 |
| ENSG00000128050 | PAICS     | -2.80E+00 | 6.75E-161 | 3.88E-158 |
| ENSG00000122641 | INHBA     | -4.82E+00 | 1.95E-157 | 1.02E-154 |
| ENSG00000120708 | TGFBI     | -2.38E+00 | 2.29E-148 | 1.05E-145 |
| ENSG00000003436 | TFPI      | -3.89E+00 | 1.22E-141 | 5.23E-139 |
| ENSG00000057019 | DCBLD2    | -2.50E+00 | 1.17E-130 | 4.57E-128 |
| ENSG00000277443 | MARCKS    | -2.30E+00 | 9.72E-124 | 3.25E-121 |
| ENSG00000140416 | TPM1      | -2.04E+00 | 1.58E-123 | 5.17E-121 |
| ENSG00000166741 | NNMT      | -3.84E+00 | 3.63E-122 | 1.17E-119 |
| ENSG00000163661 | PTX3      | -5.14E+00 | 1.43E-108 | 4.05E-106 |
| ENSG00000133110 | POSTN     | -5.19E+00 | 1.42E-105 | 3.72E-103 |
| ENSG00000128606 | LRRC17    | -3.62E+00 | 7.68E-105 | 1.99E-102 |
| ENSG00000135486 | HNRNPA1   | -1.51E+00 | 7.18E-103 | 1.78E-100 |
| ENSG00000152952 | PLOD2     | -2.21E+00 | 2.93E-102 | 7.17E-100 |
| ENSG00000117519 | CNN3      | -2.42E+00 | 1.57E-99  | 3.61E-97  |
| ENSG00000108342 | CSF3      | -5.30E+00 | 2.14E-98  | 4.80E-96  |
| ENSG00000162692 | VCAM1     | -8.06E+00 | 1.05E-97  | 2.32E-95  |
| ENSG00000114251 | WNT5A     | -2.54E+00 | 8.83E-90  | 1.69E-87  |
| ENSG00000152795 | HNRNPDL   | -1.54E+00 | 7.13E-89  | 1.34E-86  |
| ENSG00000106799 | TGFBR1    | -3.43E+00 | 2.02E-86  | 3.61E-84  |
| ENSG00000122786 | CALD1     | -1.97E+00 | 4.79E-86  | 8.47E-84  |
| ENSG00000101335 | MYL9      | -3.09E+00 | 1.31E-84  | 2.27E-82  |
| ENSG00000170558 | CDH2      | -2.69E+00 | 5.90E-82  | 9.27E-80  |
| ENSG00000128342 | LIF       | -3.39E+00 | 8.32E-82  | 1.29E-79  |
| ENSG00000100345 | MYH9      | -2.55E+00 | 3.61E-81  | 5.43E-79  |
| ENSG00000118523 | CCN2      | -3.53E+00 | 2.78E-80  | 4.02E-78  |
| ENSG00000041982 | TNC       | -5.22E+00 | 7.08E-80  | 1.02E-77  |
| ENSG00000004478 | FKBP4     | -1.88E+00 | 1.09E-78  | 1.52E-76  |
| ENSG00000128989 | ARPP19    | -2.45E+00 | 2.22E-78  | 3.07E-76  |
| ENSG00000165512 | ZNF22     | -3.13E+00 | 3.89E-77  | 5.18E-75  |
| ENSG00000100644 | HIF1A     | -1.82E+00 | 3.67E-76  | 4.78E-74  |
| ENSG00000130826 | DKC1      | -2.40E+00 | 7.54E-76  | 9.68E-74  |
| ENSG00000144381 | HSPD1     | -1.44E+00 | 4.47E-73  | 5.44E-71  |
| ENSG00000080608 | PUM3      | -2.76E+00 | 2.12E-71  | 2.42E-69  |
| ENSG00000105835 | NAMPT     | -2.07E+00 | 9.88E-71  | 1.12E-68  |
| ENSG00000156804 | FBXO32    | -2.90E+00 | 7.21E-70  | 7.98E-68  |
| ENSG00000178860 | MSC       | -5.95E+00 | 1.82E-68  | 1.96E-66  |
| ENSG00000039560 | RAI14     | -2.76E+00 | 1.96E-68  | 2.09E-66  |
| ENSG00000101384 | JAG1      | -2.19E+00 | 2.62E-68  | 2.78E-66  |
| ENSG00000134013 | LOXL2     | -2.71E+00 | 4.99E-67  | 5.15E-65  |
| ENSG00000105137 | SYDE1     | -2.94E+00 | 2.54E-65  | 2.49E-63  |
| ENSG00000108691 | CCL2      | -9.12E+00 | 3.75E-65  | 3.64E-63  |

|                 |          |           |          |          |
|-----------------|----------|-----------|----------|----------|
| ENSG00000148154 | UGCG     | -2.13E+00 | 1.95E-63 | 1.84E-61 |
| ENSG00000134294 | SLC38A2  | -1.80E+00 | 2.08E-63 | 1.95E-61 |
| ENSG00000136244 | IL6      | -7.64E+00 | 6.46E-63 | 6.00E-61 |
| ENSG00000122884 | P4HA1    | -1.60E+00 | 1.31E-62 | 1.20E-60 |
| ENSG00000168685 | IL7R     | -5.38E+00 | 4.14E-62 | 3.75E-60 |
| ENSG00000112096 | SOD2     | -3.57E+00 | 5.35E-60 | 4.63E-58 |
| ENSG00000181588 | MEX3D    | -2.37E+00 | 6.18E-60 | 5.33E-58 |
| ENSG00000131378 | RFTN1    | -2.96E+00 | 8.08E-59 | 6.69E-57 |
| ENSG00000145220 | LYAR     | -1.97E+00 | 1.09E-58 | 8.94E-57 |
| ENSG00000163938 | GNL3     | -1.91E+00 | 2.04E-57 | 1.63E-55 |
| ENSG00000106484 | MEST     | -2.64E+00 | 2.61E-57 | 2.07E-55 |
| ENSG00000114861 | FOXP1    | -2.92E+00 | 1.12E-56 | 8.61E-55 |
| ENSG00000138385 | SSB      | -1.66E+00 | 1.18E-56 | 9.03E-55 |
| ENSG00000137745 | MMP13    | -4.59E+00 | 1.58E-56 | 1.20E-54 |
| ENSG00000176014 | TUBB6    | -2.28E+00 | 2.58E-56 | 1.95E-54 |
| ENSG00000115594 | IL1R1    | -4.41E+00 | 4.15E-56 | 3.12E-54 |
| ENSG00000084112 | SSH1     | -2.69E+00 | 5.35E-56 | 4.00E-54 |
| ENSG00000101361 | NOP56    | -1.84E+00 | 1.12E-55 | 8.32E-54 |
| ENSG00000102172 | SMS      | -2.31E+00 | 5.09E-55 | 3.71E-53 |
| ENSG00000167635 | ZNF146   | -1.89E+00 | 1.31E-54 | 9.45E-53 |
| ENSG00000110841 | PPFIBP1  | -2.27E+00 | 2.45E-54 | 1.76E-52 |
| ENSG00000070961 | ATP2B1   | -1.55E+00 | 3.80E-54 | 2.69E-52 |
| ENSG00000092969 | TGFB2    | -2.51E+00 | 6.97E-54 | 4.87E-52 |
| ENSG00000119403 | PHF19    | -2.03E+00 | 8.03E-54 | 5.59E-52 |
| ENSG00000064102 | INTS13   | -1.92E+00 | 2.55E-53 | 1.74E-51 |
| ENSG00000155189 | AGPAT5   | -1.49E+00 | 2.68E-53 | 1.82E-51 |
| ENSG00000109971 | HSPA8    | -1.04E+00 | 3.25E-53 | 2.18E-51 |
| ENSG00000206053 | JPT2     | -1.81E+00 | 6.60E-53 | 4.37E-51 |
| ENSG00000134333 | LDHA     | -1.69E+00 | 5.60E-52 | 3.64E-50 |
| ENSG00000148848 | ADAM12   | -2.92E+00 | 2.06E-51 | 1.32E-49 |
| ENSG00000125148 | MT2A     | -4.68E+00 | 1.09E-50 | 6.76E-49 |
| ENSG00000124766 | SOX4     | -1.81E+00 | 1.44E-50 | 8.87E-49 |
| ENSG00000182985 | CADM1    | -2.73E+00 | 7.84E-50 | 4.79E-48 |
| ENSG00000147454 | SLC25A37 | -2.02E+00 | 8.01E-50 | 4.88E-48 |
| ENSG00000163734 | CXCL3    | -5.32E+00 | 9.11E-50 | 5.49E-48 |
| ENSG00000111252 | SH2B3    | -3.58E+00 | 2.97E-49 | 1.75E-47 |
| ENSG00000115380 | EFEMP1   | -2.43E+00 | 3.19E-49 | 1.88E-47 |
| ENSG00000141522 | ARHGDI1  | -1.79E+00 | 4.49E-49 | 2.63E-47 |
| ENSG00000071539 | TRIP13   | -1.92E+00 | 8.11E-49 | 4.72E-47 |
| ENSG00000146729 | NIPSNAP2 | -3.49E+00 | 8.80E-49 | 5.10E-47 |
| ENSG00000168264 | IRF2BP2  | -1.44E+00 | 1.56E-48 | 9.03E-47 |
| ENSG00000150630 | VEGFC    | -3.75E+00 | 3.40E-48 | 1.95E-46 |
| ENSG00000177311 | ZBTB38   | -1.75E+00 | 1.71E-47 | 9.64E-46 |
| ENSG00000152558 | TMEM123  | -2.11E+00 | 3.15E-47 | 1.76E-45 |
| ENSG00000182481 | KPNA2    | -1.52E+00 | 3.99E-47 | 2.22E-45 |

|                 |             |           |          |          |
|-----------------|-------------|-----------|----------|----------|
| ENSG00000115484 | CCT4        | -1.14E+00 | 2.09E-46 | 1.15E-44 |
| ENSG00000136026 | CKAP4       | -1.51E+00 | 2.34E-46 | 1.28E-44 |
| ENSG00000145934 | TENM2       | -5.73E+00 | 2.52E-46 | 1.37E-44 |
| ENSG00000160991 | ORAI2       | -2.12E+00 | 1.64E-45 | 8.77E-44 |
| ENSG00000145907 | G3BP1       | -1.45E+00 | 4.24E-45 | 2.25E-43 |
| ENSG00000142871 | CCN1        | -1.11E+00 | 4.46E-45 | 2.35E-43 |
| ENSG00000134057 | CCNB1       | -1.81E+00 | 5.23E-45 | 2.75E-43 |
| ENSG00000104635 | SLC39A14    | -2.02E+00 | 7.20E-45 | 3.77E-43 |
| ENSG00000132780 | NASP        | -1.49E+00 | 4.39E-44 | 2.27E-42 |
| ENSG00000104408 | EIF3E       | -1.20E+00 | 1.19E-43 | 6.06E-42 |
| ENSG00000134954 | ETS1        | -2.17E+00 | 5.77E-43 | 2.87E-41 |
| ENSG00000055044 | NOP58       | -1.26E+00 | 8.76E-43 | 4.32E-41 |
| ENSG00000089351 | GRAMD1A     | -2.34E+00 | 8.87E-43 | 4.36E-41 |
| ENSG00000115053 | NCL         | -1.54E+00 | 1.39E-42 | 6.70E-41 |
| ENSG00000189403 | HMGB1       | -1.22E+00 | 2.60E-42 | 1.24E-40 |
| ENSG00000104332 | SFRP1       | -2.38E+00 | 3.14E-42 | 1.50E-40 |
| ENSG00000185551 | NR2F2       | -1.89E+00 | 3.93E-42 | 1.87E-40 |
| ENSG00000143228 | NUF2        | -1.83E+00 | 6.85E-42 | 3.21E-40 |
| ENSG00000204856 | FAM216A     | -3.83E+00 | 3.78E-41 | 1.73E-39 |
| ENSG00000182752 | PAPPA       | -4.65E+00 | 5.92E-41 | 2.70E-39 |
| ENSG00000144749 | LRIG1       | -2.41E+00 | 8.41E-41 | 3.81E-39 |
| ENSG00000072958 | AP1M1       | -2.09E+00 | 1.15E-40 | 5.19E-39 |
| ENSG00000121152 | NCAPH       | -2.17E+00 | 2.43E-40 | 1.07E-38 |
| ENSG00000136997 | MYC         | -2.89E+00 | 4.88E-40 | 2.12E-38 |
| ENSG00000182197 | EXT1        | -1.62E+00 | 1.01E-39 | 4.35E-38 |
| ENSG00000165704 | HPRT1       | -1.94E+00 | 1.03E-39 | 4.42E-38 |
| ENSG00000163017 | ACTG2       | -7.69E+00 | 3.09E-39 | 1.30E-37 |
| ENSG00000075142 | SRI         | -2.53E+00 | 3.14E-39 | 1.32E-37 |
| ENSG00000211455 | STK38L      | -1.76E+00 | 3.27E-39 | 1.37E-37 |
| ENSG00000196363 | WDR5        | -2.86E+00 | 6.10E-39 | 2.53E-37 |
| ENSG00000169429 | CXCL8       | -6.38E+00 | 8.36E-39 | 3.45E-37 |
| ENSG00000124207 | CSE1L       | -1.10E+00 | 1.75E-38 | 7.17E-37 |
| ENSG00000136490 | LIMD2       | -3.84E+00 | 2.27E-38 | 9.21E-37 |
| ENSG00000157654 | PALM2-AKAP2 | -1.80E+00 | 4.20E-38 | 1.69E-36 |
| ENSG00000171490 | RSL1D1      | -1.18E+00 | 7.56E-38 | 3.03E-36 |
| ENSG00000126457 | PRMT1       | -2.24E+00 | 1.11E-37 | 4.40E-36 |
| ENSG00000080573 | COL5A3      | -2.89E+00 | 1.39E-37 | 5.46E-36 |
| ENSG00000204262 | COL5A2      | -1.91E+00 | 1.41E-37 | 5.57E-36 |
| ENSG00000181163 | NPM1        | -1.73E+00 | 2.21E-37 | 8.53E-36 |
| ENSG00000117020 | AKT3        | -1.81E+00 | 2.39E-37 | 9.19E-36 |
| ENSG00000105825 | TFPI2       | -4.73E+00 | 2.42E-37 | 9.30E-36 |
| ENSG00000173726 | TOMM20      | -1.26E+00 | 3.15E-37 | 1.20E-35 |
| ENSG00000213160 | KLHL23      | -2.57E+00 | 3.37E-37 | 1.28E-35 |
| ENSG00000040275 | SPDL1       | -1.53E+00 | 5.18E-37 | 1.95E-35 |
| ENSG00000150347 | ARID5B      | -2.88E+00 | 6.72E-37 | 2.53E-35 |

|                 |          |           |          |          |
|-----------------|----------|-----------|----------|----------|
| ENSG00000056558 | TRAF1    | -4.61E+00 | 7.99E-37 | 2.99E-35 |
| ENSG00000162614 | NEXN     | -2.56E+00 | 1.13E-36 | 4.23E-35 |
| ENSG00000163468 | CCT3     | -1.05E+00 | 1.14E-36 | 4.26E-35 |
| ENSG00000143401 | ANP32E   | -1.57E+00 | 1.61E-36 | 5.94E-35 |
| ENSG00000184220 | CMSS1    | -1.72E+00 | 1.87E-36 | 6.85E-35 |
| ENSG00000122406 | RPL5     | -1.53E+00 | 2.37E-36 | 8.61E-35 |
| ENSG00000113460 | BRIX1    | -1.23E+00 | 2.51E-36 | 9.11E-35 |
| ENSG00000178035 | IMPDH2   | -1.52E+00 | 3.11E-36 | 1.12E-34 |
| ENSG00000144642 | RBMS3    | -3.46E+00 | 3.21E-36 | 1.15E-34 |
| ENSG00000107833 | NPM3     | -2.79E+00 | 3.61E-36 | 1.29E-34 |
| ENSG00000130024 | PHF10    | -1.74E+00 | 3.96E-36 | 1.41E-34 |
| ENSG00000172380 | GNG12    | -1.53E+00 | 7.56E-36 | 2.67E-34 |
| ENSG00000099810 | MTAP     | -1.46E+00 | 9.08E-36 | 3.19E-34 |
| ENSG00000111716 | LDHB     | -1.70E+00 | 2.30E-35 | 7.92E-34 |
| ENSG00000074219 | TEAD2    | -3.33E+00 | 5.77E-35 | 1.95E-33 |
| ENSG00000114446 | IFT57    | -1.62E+00 | 9.49E-35 | 3.19E-33 |
| ENSG00000149591 | TAGLN    | -3.19E+00 | 9.78E-35 | 3.28E-33 |
| ENSG00000197498 | RPF2     | -1.69E+00 | 2.03E-34 | 6.75E-33 |
| ENSG00000138448 | ITGAV    | -1.68E+00 | 2.07E-34 | 6.86E-33 |
| ENSG00000153936 | HS2ST1   | -1.83E+00 | 3.59E-34 | 1.18E-32 |
| ENSG00000156508 | EEF1A1   | -1.29E+00 | 6.36E-34 | 2.09E-32 |
| ENSG00000114450 | GNB4     | -1.84E+00 | 1.59E-33 | 5.10E-32 |
| ENSG00000235531 | MSC-AS1  | -2.29E+00 | 1.74E-33 | 5.58E-32 |
| ENSG00000065150 | IPO5     | -1.20E+00 | 1.76E-33 | 5.64E-32 |
| ENSG00000111845 | PAK1IP1  | -2.02E+00 | 3.36E-33 | 1.07E-31 |
| ENSG00000163597 | SNHG16   | -1.50E+00 | 3.39E-33 | 1.07E-31 |
| ENSG00000154473 | BUB3     | -1.14E+00 | 3.74E-33 | 1.18E-31 |
| ENSG00000154945 | ANKRD40  | -1.60E+00 | 3.76E-33 | 1.18E-31 |
| ENSG00000124875 | CXCL6    | -9.38E+00 | 4.00E-33 | 1.26E-31 |
| ENSG00000163811 | WDR43    | -1.36E+00 | 4.32E-33 | 1.36E-31 |
| ENSG00000072110 | ACTN1    | -1.17E+00 | 5.75E-33 | 1.79E-31 |
| ENSG00000166949 | SMAD3    | -1.57E+00 | 5.82E-33 | 1.81E-31 |
| ENSG00000128283 | CDC42EP1 | -2.37E+00 | 7.55E-33 | 2.34E-31 |
| ENSG00000107949 | BCCIP    | -1.15E+00 | 9.45E-33 | 2.91E-31 |
| ENSG00000136261 | BZW2     | -2.31E+00 | 1.41E-32 | 4.30E-31 |
| ENSG00000026025 | VIM      | -2.11E+00 | 1.61E-32 | 4.88E-31 |
| ENSG00000196715 | VKORC1L1 | -2.34E+00 | 3.23E-32 | 9.73E-31 |
| ENSG00000176171 | BNIP3    | -3.10E+00 | 3.43E-32 | 1.03E-30 |
| ENSG00000164465 | DCBLD1   | -1.78E+00 | 3.45E-32 | 1.03E-30 |
| ENSG00000198034 | RPS4X    | -1.41E+00 | 4.20E-32 | 1.25E-30 |
| ENSG00000168542 | COL3A1   | -2.74E+00 | 5.20E-32 | 1.54E-30 |
| ENSG00000128059 | PPAT     | -2.07E+00 | 1.04E-31 | 3.03E-30 |
| ENSG00000111799 | COL12A1  | -4.11E+00 | 1.13E-31 | 3.31E-30 |
| ENSG00000081041 | CXCL2    | -7.52E+00 | 2.63E-31 | 7.61E-30 |
| ENSG00000089006 | SNX5     | -1.00E+00 | 6.05E-31 | 1.74E-29 |

|                 |           |           |          |          |
|-----------------|-----------|-----------|----------|----------|
| ENSG00000132639 | SNAP25    | -4.29E+00 | 6.07E-31 | 1.74E-29 |
| ENSG00000159200 | RCAN1     | -2.24E+00 | 6.29E-31 | 1.80E-29 |
| ENSG00000196628 | TCF4      | -2.83E+00 | 7.76E-31 | 2.22E-29 |
| ENSG00000106366 | SERPINE1  | -2.38E+00 | 8.00E-31 | 2.28E-29 |
| ENSG00000137076 | TLN1      | -2.16E+00 | 9.86E-31 | 2.78E-29 |
| ENSG00000152990 | ADGRA3    | -2.39E+00 | 1.24E-30 | 3.48E-29 |
| ENSG00000115561 | CHMP3     | -1.59E+00 | 1.96E-30 | 5.46E-29 |
| ENSG00000159128 | IFNGR2    | -1.91E+00 | 2.20E-30 | 6.10E-29 |
| ENSG00000116649 | SRM       | -1.85E+00 | 2.69E-30 | 7.44E-29 |
| ENSG00000101447 | FAM83D    | -1.47E+00 | 3.49E-30 | 9.60E-29 |
| ENSG00000153993 | SEMA3D    | -2.87E+00 | 4.29E-30 | 1.17E-28 |
| ENSG00000139278 | GLIPR1    | -3.06E+00 | 4.64E-30 | 1.26E-28 |
| ENSG00000103202 | NME4      | -3.07E+00 | 5.45E-30 | 1.47E-28 |
| ENSG00000106546 | AHR       | -1.95E+00 | 6.74E-30 | 1.82E-28 |
| ENSG00000182718 | ANXA2     | -1.34E+00 | 1.00E-29 | 2.66E-28 |
| ENSG00000164163 | ABCE1     | -1.39E+00 | 1.53E-29 | 4.02E-28 |
| ENSG00000128641 | MYO1B     | -1.47E+00 | 2.58E-29 | 6.75E-28 |
| ENSG00000158290 | CUL4B     | -1.46E+00 | 3.25E-29 | 8.49E-28 |
| ENSG00000148677 | ANKRD1    | -4.44E+00 | 3.37E-29 | 8.77E-28 |
| ENSG00000111912 | NCOA7     | -1.95E+00 | 3.92E-29 | 1.02E-27 |
| ENSG00000145386 | CCNA2     | -1.31E+00 | 4.38E-29 | 1.13E-27 |
| ENSG00000119729 | RHOQ      | -1.86E+00 | 4.71E-29 | 1.22E-27 |
| ENSG00000157350 | ST3GAL2   | -1.32E+00 | 5.04E-29 | 1.30E-27 |
| ENSG00000099250 | NRP1      | -2.55E+00 | 6.36E-29 | 1.63E-27 |
| ENSG00000143641 | GALNT2    | -1.51E+00 | 7.46E-29 | 1.91E-27 |
| ENSG00000132341 | RAN       | -1.46E+00 | 7.73E-29 | 1.98E-27 |
| ENSG00000164109 | MAD2L1    | -1.57E+00 | 8.37E-29 | 2.14E-27 |
| ENSG00000135074 | ADAM19    | -2.24E+00 | 8.41E-29 | 2.15E-27 |
| ENSG00000164932 | CTHRC1    | -3.60E+00 | 8.48E-29 | 2.16E-27 |
| ENSG00000198826 | ARHGAP11A | -1.63E+00 | 9.14E-29 | 2.32E-27 |
| ENSG00000049249 | TNFRSF9   | -3.23E+00 | 9.38E-29 | 2.37E-27 |
| ENSG00000166197 | NOLC1     | -1.47E+00 | 9.59E-29 | 2.42E-27 |
| ENSG00000026559 | KCNG1     | -1.64E+00 | 1.01E-28 | 2.53E-27 |
| ENSG00000166250 | CLMP      | -2.08E+00 | 1.35E-28 | 3.35E-27 |
| ENSG00000178921 | PFAS      | -2.54E+00 | 1.44E-28 | 3.56E-27 |
| ENSG00000077150 | NFKB2     | -1.54E+00 | 1.48E-28 | 3.65E-27 |
| ENSG00000073756 | PTGS2     | -3.60E+00 | 1.59E-28 | 3.93E-27 |
| ENSG00000065183 | WDR3      | -2.77E+00 | 1.63E-28 | 4.01E-27 |
| ENSG00000000003 | TSPAN6    | -1.77E+00 | 2.68E-28 | 6.50E-27 |
| ENSG00000076248 | UNG       | -1.62E+00 | 3.38E-28 | 8.17E-27 |
| ENSG00000142945 | KIF2C     | -1.64E+00 | 3.48E-28 | 8.38E-27 |
| ENSG00000111275 | ALDH2     | -2.49E+00 | 3.48E-28 | 8.38E-27 |
| ENSG00000170854 | RIOX2     | -2.60E+00 | 3.71E-28 | 8.89E-27 |
| ENSG00000100243 | CYB5R3    | -1.93E+00 | 6.53E-28 | 1.54E-26 |
| ENSG00000178105 | DDX10     | -2.33E+00 | 7.17E-28 | 1.69E-26 |



|                 |          |           |          |          |
|-----------------|----------|-----------|----------|----------|
| ENSG00000205581 | HMG1     | -1.05E+00 | 1.20E-27 | 2.80E-26 |
| ENSG00000092199 | HNRNPC   | -1.11E+00 | 1.42E-27 | 3.29E-26 |
| ENSG00000182054 | IDH2     | -2.00E+00 | 1.67E-27 | 3.86E-26 |
| ENSG00000171453 | POLR1C   | -1.43E+00 | 1.75E-27 | 4.05E-26 |
| ENSG00000147274 | RBMX     | -1.14E+00 | 1.81E-27 | 4.18E-26 |
| ENSG00000116120 | FARSB    | -2.09E+00 | 2.25E-27 | 5.19E-26 |
| ENSG00000198042 | MAK16    | -2.23E+00 | 2.56E-27 | 5.86E-26 |
| ENSG00000159131 | GART     | -1.23E+00 | 2.67E-27 | 6.10E-26 |
| ENSG00000157500 | APPL1    | -2.06E+00 | 2.86E-27 | 6.54E-26 |
| ENSG00000113721 | PDGFRB   | -2.42E+00 | 3.15E-27 | 7.18E-26 |
| ENSG00000110172 | CHORDC1  | -1.49E+00 | 4.09E-27 | 9.23E-26 |
| ENSG00000140682 | TGFB11   | -1.92E+00 | 4.34E-27 | 9.79E-26 |
| ENSG00000152556 | PFKM     | -2.05E+00 | 6.78E-27 | 1.52E-25 |
| ENSG00000089009 | RPL6     | -1.29E+00 | 8.60E-27 | 1.92E-25 |
| ENSG00000147687 | TATDN1   | -2.08E+00 | 1.14E-26 | 2.52E-25 |
| ENSG00000111817 | DSE      | -1.43E+00 | 1.32E-26 | 2.92E-25 |
| ENSG00000118985 | ELL2     | -1.94E+00 | 1.36E-26 | 2.99E-25 |
| ENSG00000175792 | RUVBL1   | -1.61E+00 | 1.68E-26 | 3.66E-25 |
| ENSG00000108561 | C1QBP    | -1.73E+00 | 1.73E-26 | 3.76E-25 |
| ENSG00000101255 | TRIB3    | -2.12E+00 | 1.83E-26 | 3.98E-25 |
| ENSG00000123131 | PRDX4    | -1.85E+00 | 3.92E-26 | 8.42E-25 |
| ENSG00000085415 | SEH1L    | -1.80E+00 | 3.97E-26 | 8.53E-25 |
| ENSG00000140443 | IGF1R    | -2.28E+00 | 6.40E-26 | 1.36E-24 |
| ENSG00000123485 | HJURP    | -1.52E+00 | 6.90E-26 | 1.47E-24 |
| ENSG00000105185 | PDCD5    | -2.22E+00 | 7.36E-26 | 1.56E-24 |
| ENSG00000171724 | VAT1L    | -2.84E+00 | 7.44E-26 | 1.58E-24 |
| ENSG00000109805 | NCAPG    | -1.26E+00 | 9.98E-26 | 2.11E-24 |
| ENSG00000171951 | SCG2     | -3.33E+00 | 1.01E-25 | 2.13E-24 |
| ENSG00000164176 | EDIL3    | -1.49E+00 | 1.02E-25 | 2.16E-24 |
| ENSG00000145860 | RNF145   | -1.15E+00 | 1.11E-25 | 2.33E-24 |
| ENSG00000090621 | PABPC4   | -1.03E+00 | 1.26E-25 | 2.63E-24 |
| ENSG00000105255 | FSD1     | -2.05E+00 | 1.38E-25 | 2.89E-24 |
| ENSG00000135521 | LTV1     | -1.29E+00 | 1.42E-25 | 2.96E-24 |
| ENSG00000165732 | DDX21    | -1.12E+00 | 1.45E-25 | 3.02E-24 |
| ENSG00000163739 | CXCL1    | -4.02E+00 | 1.47E-25 | 3.06E-24 |
| ENSG00000130935 | NOL11    | -1.23E+00 | 1.49E-25 | 3.10E-24 |
| ENSG00000141905 | NFIC     | -1.61E+00 | 1.63E-25 | 3.39E-24 |
| ENSG00000225663 | MCRIP1   | -3.73E+00 | 1.84E-25 | 3.82E-24 |
| ENSG00000165801 | ARHGEF40 | -2.05E+00 | 2.02E-25 | 4.18E-24 |
| ENSG00000137154 | RPS6     | -1.33E+00 | 2.05E-25 | 4.24E-24 |
| ENSG00000166012 | TAF1D    | -1.06E+00 | 2.06E-25 | 4.24E-24 |
| ENSG00000166923 | GREM1    | -3.88E+00 | 2.14E-25 | 4.41E-24 |
| ENSG00000049449 | RCN1     | -1.07E+00 | 2.72E-25 | 5.58E-24 |
| ENSG00000048162 | NOP16    | -1.62E+00 | 3.20E-25 | 6.55E-24 |
| ENSG00000058056 | USP13    | -1.90E+00 | 3.74E-25 | 7.61E-24 |

|                 |            |           |          |          |
|-----------------|------------|-----------|----------|----------|
| ENSG00000155903 | RASA2      | -3.39E+00 | 3.99E-25 | 8.09E-24 |
| ENSG00000147408 | CSGALNACT1 | -3.05E+00 | 4.93E-25 | 9.97E-24 |
| ENSG00000122565 | CBX3       | -1.34E+00 | 5.44E-25 | 1.10E-23 |
| ENSG00000074695 | LMAN1      | -1.11E+00 | 5.90E-25 | 1.19E-23 |
| ENSG00000095752 | IL11       | -2.30E+00 | 7.13E-25 | 1.43E-23 |
| ENSG00000159167 | STC1       | -3.14E+00 | 1.10E-24 | 2.20E-23 |
| ENSG00000100413 | POLR3H     | -1.49E+00 | 1.55E-24 | 3.06E-23 |
| ENSG00000140945 | CDH13      | -1.73E+00 | 1.60E-24 | 3.15E-23 |
| ENSG00000112984 | KIF20A     | -1.97E+00 | 1.64E-24 | 3.22E-23 |
| ENSG00000168268 | NT5DC2     | -1.63E+00 | 2.06E-24 | 4.03E-23 |
| ENSG00000088205 | DDX18      | -1.63E+00 | 2.40E-24 | 4.66E-23 |
| ENSG00000178999 | AURKB      | -2.12E+00 | 2.58E-24 | 5.02E-23 |
| ENSG00000117228 | GBP1       | -1.34E+00 | 2.81E-24 | 5.44E-23 |
| ENSG00000181104 | F2R        | -2.15E+00 | 3.00E-24 | 5.78E-23 |
| ENSG00000175387 | SMAD2      | -1.43E+00 | 3.60E-24 | 6.92E-23 |
| ENSG00000138668 | HNRNPD     | -1.00E+00 | 3.77E-24 | 7.24E-23 |
| ENSG00000166681 | BEX3       | -1.73E+00 | 4.09E-24 | 7.82E-23 |
| ENSG00000006634 | DBF4       | -1.53E+00 | 4.19E-24 | 8.00E-23 |
| ENSG00000141030 | COPS3      | -1.01E+00 | 5.32E-24 | 1.01E-22 |
| ENSG00000261327 | AC134312.5 | -3.35E+00 | 5.80E-24 | 1.10E-22 |
| ENSG00000113368 | LMNB1      | -1.64E+00 | 6.24E-24 | 1.18E-22 |
| ENSG00000173145 | NOC3L      | -1.76E+00 | 6.55E-24 | 1.24E-22 |
| ENSG00000148843 | PDCD11     | -1.66E+00 | 7.62E-24 | 1.44E-22 |
| ENSG00000114023 | FAM162A    | -1.72E+00 | 8.86E-24 | 1.66E-22 |
| ENSG00000072042 | RDH11      | -1.16E+00 | 8.88E-24 | 1.66E-22 |
| ENSG00000010292 | NCAPD2     | -1.21E+00 | 9.79E-24 | 1.83E-22 |
| ENSG00000111450 | STX2       | -2.63E+00 | 1.16E-23 | 2.15E-22 |
| ENSG00000137124 | ALDH1B1    | -2.63E+00 | 1.38E-23 | 2.55E-22 |
| ENSG00000164934 | DCAF13     | -1.26E+00 | 1.51E-23 | 2.78E-22 |
| ENSG00000123610 | TNFAIP6    | -2.69E+00 | 1.81E-23 | 3.32E-22 |
| ENSG00000138074 | SLC5A6     | -1.94E+00 | 1.85E-23 | 3.39E-22 |
| ENSG00000131238 | PPT1       | -1.17E+00 | 2.38E-23 | 4.33E-22 |
| ENSG00000167552 | TUBA1A     | -1.36E+00 | 2.57E-23 | 4.67E-22 |
| ENSG00000105849 | TWISTNB    | -1.52E+00 | 2.59E-23 | 4.70E-22 |
| ENSG00000163359 | COL6A3     | -1.25E+00 | 2.99E-23 | 5.42E-22 |
| ENSG00000162433 | AK4        | -2.11E+00 | 3.10E-23 | 5.60E-22 |
| ENSG00000145425 | RPS3A      | -1.56E+00 | 3.31E-23 | 5.96E-22 |
| ENSG00000162377 | COA7       | -1.60E+00 | 4.74E-23 | 8.50E-22 |
| ENSG00000117318 | ID3        | -1.54E+00 | 5.89E-23 | 1.05E-21 |
| ENSG00000153071 | DAB2       | -2.41E+00 | 6.65E-23 | 1.18E-21 |
| ENSG00000136108 | CKAP2      | -1.46E+00 | 7.48E-23 | 1.32E-21 |
| ENSG00000115163 | CENPA      | -2.07E+00 | 7.63E-23 | 1.35E-21 |
| ENSG00000162694 | EXTL2      | -2.01E+00 | 8.18E-23 | 1.44E-21 |
| ENSG00000135698 | MPHOSPH6   | -1.48E+00 | 8.46E-23 | 1.49E-21 |
| ENSG00000146376 | ARHGAP18   | -2.91E+00 | 9.94E-23 | 1.74E-21 |

|                 |          |           |          |          |
|-----------------|----------|-----------|----------|----------|
| ENSG00000137807 | KIF23    | -1.45E+00 | 1.02E-22 | 1.78E-21 |
| ENSG00000183527 | PSMG1    | -2.12E+00 | 1.05E-22 | 1.83E-21 |
| ENSG00000196700 | ZNF512B  | -2.78E+00 | 1.12E-22 | 1.96E-21 |
| ENSG00000131943 | C19orf12 | -3.14E+00 | 1.19E-22 | 2.07E-21 |
| ENSG00000163535 | SGO2     | -1.97E+00 | 1.24E-22 | 2.15E-21 |
| ENSG00000255302 | EID1     | -1.07E+00 | 1.41E-22 | 2.43E-21 |
| ENSG00000008311 | AASS     | -2.27E+00 | 1.73E-22 | 2.97E-21 |
| ENSG00000178531 | CTXN1    | -1.82E+00 | 1.91E-22 | 3.28E-21 |
| ENSG00000143799 | PARP1    | -1.09E+00 | 1.93E-22 | 3.31E-21 |
| ENSG00000150938 | CRIM1    | -1.16E+00 | 1.99E-22 | 3.40E-21 |
| ENSG00000146535 | GNA12    | -1.82E+00 | 2.19E-22 | 3.74E-21 |
| ENSG00000180801 | ARSJ     | -2.06E+00 | 2.33E-22 | 3.97E-21 |
| ENSG00000154096 | THY1     | -2.15E+00 | 2.77E-22 | 4.70E-21 |
| ENSG00000115363 | EVA1A    | -4.92E+00 | 2.97E-22 | 5.03E-21 |
| ENSG00000073111 | MCM2     | -1.26E+00 | 3.34E-22 | 5.65E-21 |
| ENSG00000164649 | CDCA7L   | -1.69E+00 | 3.80E-22 | 6.38E-21 |
| ENSG00000105202 | FBL      | -1.30E+00 | 4.05E-22 | 6.80E-21 |
| ENSG00000108861 | DUSP3    | -1.72E+00 | 4.25E-22 | 7.11E-21 |
| ENSG00000134686 | PHC2     | -1.34E+00 | 5.12E-22 | 8.55E-21 |
| ENSG00000087586 | AURKA    | -1.51E+00 | 5.86E-22 | 9.78E-21 |
| ENSG00000172156 | CCL11    | -7.79E+00 | 7.93E-22 | 1.32E-20 |
| ENSG00000166851 | PLK1     | -1.63E+00 | 8.08E-22 | 1.34E-20 |
| ENSG00000135919 | SERPINE2 | -1.23E+00 | 9.39E-22 | 1.55E-20 |
| ENSG00000137962 | ARHGAP29 | -1.32E+00 | 9.47E-22 | 1.56E-20 |
| ENSG00000198363 | ASPH     | -1.05E+00 | 1.06E-21 | 1.74E-20 |
| ENSG00000113758 | DBN1     | -1.54E+00 | 1.33E-21 | 2.17E-20 |
| ENSG00000091127 | PUS7     | -2.49E+00 | 1.39E-21 | 2.27E-20 |
| ENSG00000115816 | CEBPZ    | -1.02E+00 | 1.91E-21 | 3.10E-20 |
| ENSG00000185359 | HGS      | -1.56E+00 | 3.30E-21 | 5.27E-20 |
| ENSG00000104472 | CHRAC1   | -1.51E+00 | 4.09E-21 | 6.49E-20 |
| ENSG00000198900 | TOP1     | -1.24E+00 | 4.51E-21 | 7.15E-20 |
| ENSG00000151835 | SACS     | -1.83E+00 | 4.84E-21 | 7.65E-20 |
| ENSG00000138685 | FGF2     | -1.27E+00 | 5.19E-21 | 8.19E-20 |
| ENSG00000177425 | PAWR     | -1.15E+00 | 5.87E-21 | 9.24E-20 |
| ENSG00000085491 | SLC25A24 | -1.14E+00 | 7.41E-21 | 1.16E-19 |
| ENSG00000097033 | SH3GLB1  | -1.63E+00 | 1.07E-20 | 1.67E-19 |
| ENSG00000156471 | PTDSS1   | -1.37E+00 | 1.25E-20 | 1.94E-19 |
| ENSG00000132541 | RIDA     | -2.02E+00 | 1.29E-20 | 1.99E-19 |
| ENSG00000121940 | CLCC1    | -2.74E+00 | 1.31E-20 | 2.02E-19 |
| ENSG00000110330 | BIRC2    | -1.58E+00 | 1.55E-20 | 2.39E-19 |
| ENSG00000153560 | UBP1     | -1.25E+00 | 1.78E-20 | 2.74E-19 |
| ENSG00000173068 | BNC2     | -2.68E+00 | 1.81E-20 | 2.77E-19 |
| ENSG00000146072 | TNFRSF21 | -1.83E+00 | 1.94E-20 | 2.97E-19 |
| ENSG00000162458 | FBLIM1   | -1.77E+00 | 2.47E-20 | 3.75E-19 |
| ENSG00000104884 | ERCC2    | -2.01E+00 | 2.69E-20 | 4.09E-19 |

|                 |          |           |          |          |
|-----------------|----------|-----------|----------|----------|
| ENSG00000184277 | TM2D3    | -2.10E+00 | 2.75E-20 | 4.18E-19 |
| ENSG00000075420 | FNDC3B   | -1.11E+00 | 3.27E-20 | 4.95E-19 |
| ENSG00000004455 | AK2      | -1.79E+00 | 3.45E-20 | 5.21E-19 |
| ENSG00000117650 | NEK2     | -1.49E+00 | 3.54E-20 | 5.35E-19 |
| ENSG00000100029 | PES1     | -1.14E+00 | 3.68E-20 | 5.55E-19 |
| ENSG00000152749 | GPR180   | -1.27E+00 | 4.11E-20 | 6.16E-19 |
| ENSG00000184838 | PRR16    | -3.81E+00 | 4.15E-20 | 6.21E-19 |
| ENSG00000139318 | DUSP6    | -2.37E+00 | 4.59E-20 | 6.85E-19 |
| ENSG00000167721 | TSR1     | -1.28E+00 | 5.21E-20 | 7.75E-19 |
| ENSG00000173757 | STAT5B   | -1.55E+00 | 5.35E-20 | 7.96E-19 |
| ENSG00000198796 | ALPK2    | -2.54E+00 | 8.02E-20 | 1.18E-18 |
| ENSG00000074201 | CLNS1A   | -1.01E+00 | 8.70E-20 | 1.28E-18 |
| ENSG00000112186 | CAP2     | -3.81E+00 | 8.73E-20 | 1.28E-18 |
| ENSG00000099194 | SCD      | -1.05E+00 | 9.93E-20 | 1.46E-18 |
| ENSG00000162645 | GBP2     | -3.15E+00 | 1.01E-19 | 1.48E-18 |
| ENSG00000121864 | ZNF639   | -1.87E+00 | 1.06E-19 | 1.55E-18 |
| ENSG00000123179 | EBPL     | -2.43E+00 | 1.16E-19 | 1.69E-18 |
| ENSG00000114686 | MRPL3    | -1.13E+00 | 1.18E-19 | 1.71E-18 |
| ENSG00000156110 | ADK      | -1.33E+00 | 1.25E-19 | 1.81E-18 |
| ENSG00000131370 | SH3BP5   | -2.81E+00 | 1.47E-19 | 2.12E-18 |
| ENSG00000166788 | SAAL1    | -1.53E+00 | 1.65E-19 | 2.38E-18 |
| ENSG00000116251 | RPL22    | -1.25E+00 | 1.77E-19 | 2.54E-18 |
| ENSG00000186340 | THBS2    | -2.44E+00 | 2.19E-19 | 3.12E-18 |
| ENSG00000146281 | PM20D2   | -1.72E+00 | 2.29E-19 | 3.27E-18 |
| ENSG00000198755 | RPL10A   | -1.29E+00 | 2.83E-19 | 4.01E-18 |
| ENSG00000135624 | CCT7     | -1.06E+00 | 3.93E-19 | 5.52E-18 |
| ENSG00000111328 | CDK2AP1  | -1.61E+00 | 3.94E-19 | 5.53E-18 |
| ENSG00000101871 | MID1     | -1.93E+00 | 4.22E-19 | 5.91E-18 |
| ENSG00000159164 | SV2A     | -1.53E+00 | 4.40E-19 | 6.16E-18 |
| ENSG00000134986 | NREP     | -3.68E+00 | 5.99E-19 | 8.30E-18 |
| ENSG00000129128 | SPCS3    | -1.08E+00 | 6.01E-19 | 8.31E-18 |
| ENSG00000179431 | FJX1     | -4.48E+00 | 6.25E-19 | 8.63E-18 |
| ENSG00000122862 | SRGN     | -2.27E+00 | 6.77E-19 | 9.31E-18 |
| ENSG00000184374 | COLEC10  | -4.19E+00 | 6.95E-19 | 9.54E-18 |
| ENSG00000130176 | CNN1     | -2.11E+00 | 6.96E-19 | 9.55E-18 |
| ENSG00000086189 | DIMT1    | -2.09E+00 | 8.42E-19 | 1.15E-17 |
| ENSG00000145332 | KLHL8    | -2.10E+00 | 8.72E-19 | 1.19E-17 |
| ENSG00000123094 | RASSF8   | -1.24E+00 | 8.77E-19 | 1.19E-17 |
| ENSG00000143157 | POGK     | -3.80E+00 | 9.59E-19 | 1.30E-17 |
| ENSG00000168028 | RPSA     | -1.28E+00 | 1.05E-18 | 1.43E-17 |
| ENSG00000180340 | FZD2     | -2.24E+00 | 1.16E-18 | 1.57E-17 |
| ENSG00000163808 | KIF15    | -1.71E+00 | 1.25E-18 | 1.69E-17 |
| ENSG00000179041 | RRS1     | -2.00E+00 | 1.25E-18 | 1.69E-17 |
| ENSG00000010270 | STARD3NL | -1.84E+00 | 1.35E-18 | 1.82E-17 |
| ENSG00000143067 | ZNF697   | -2.39E+00 | 1.57E-18 | 2.10E-17 |

|                 |          |           |          |          |
|-----------------|----------|-----------|----------|----------|
| ENSG00000023445 | BIRC3    | -2.90E+00 | 1.77E-18 | 2.36E-17 |
| ENSG00000145147 | SLIT2    | -1.64E+00 | 1.95E-18 | 2.60E-17 |
| ENSG00000134987 | WDR36    | -1.63E+00 | 2.30E-18 | 3.04E-17 |
| ENSG00000126602 | TRAP1    | -1.47E+00 | 2.45E-18 | 3.23E-17 |
| ENSG00000074800 | ENO1     | -1.27E+00 | 2.45E-18 | 3.23E-17 |
| ENSG00000104320 | NBN      | -1.35E+00 | 2.47E-18 | 3.25E-17 |
| ENSG00000151414 | NEK7     | -1.81E+00 | 2.55E-18 | 3.36E-17 |
| ENSG00000125841 | NRSN2    | -1.48E+00 | 2.55E-18 | 3.36E-17 |
| ENSG00000099998 | GGT5     | -2.90E+00 | 2.84E-18 | 3.73E-17 |
| ENSG00000137692 | DCUN1D5  | -1.64E+00 | 3.67E-18 | 4.79E-17 |
| ENSG00000123975 | CKS2     | -2.10E+00 | 4.62E-18 | 6.01E-17 |
| ENSG00000071054 | MAP4K4   | -1.04E+00 | 4.93E-18 | 6.39E-17 |
| ENSG00000151135 | TMEM263  | -1.09E+00 | 5.12E-18 | 6.64E-17 |
| ENSG00000075213 | SEMA3A   | -4.00E+00 | 7.56E-18 | 9.72E-17 |
| ENSG00000175063 | UBE2C    | -1.17E+00 | 9.46E-18 | 1.21E-16 |
| ENSG00000115946 | PNO1     | -1.86E+00 | 9.85E-18 | 1.26E-16 |
| ENSG00000015475 | BID      | -2.81E+00 | 1.03E-17 | 1.31E-16 |
| ENSG00000186575 | NF2      | -1.20E+00 | 1.24E-17 | 1.57E-16 |
| ENSG00000125538 | IL1B     | -5.85E+00 | 1.29E-17 | 1.63E-16 |
| ENSG00000165304 | MELK     | -1.09E+00 | 1.37E-17 | 1.73E-16 |
| ENSG00000198498 | TMA16    | -1.24E+00 | 1.44E-17 | 1.81E-16 |
| ENSG00000162585 | FAAP20   | -2.24E+00 | 1.66E-17 | 2.09E-16 |
| ENSG00000169604 | ANTXR1   | -1.69E+00 | 1.68E-17 | 2.11E-16 |
| ENSG00000138835 | RGS3     | -2.49E+00 | 1.83E-17 | 2.30E-16 |
| ENSG00000128609 | NDUFA5   | -1.04E+00 | 1.94E-17 | 2.43E-16 |
| ENSG00000069998 | HDHD5    | -1.31E+00 | 2.22E-17 | 2.76E-16 |
| ENSG00000186468 | RPS23    | -1.62E+00 | 2.47E-17 | 3.06E-16 |
| ENSG00000186185 | KIF18B   | -1.48E+00 | 2.61E-17 | 3.23E-16 |
| ENSG00000011426 | ANLN     | -1.21E+00 | 2.77E-17 | 3.41E-16 |
| ENSG00000131467 | PSME3    | -1.20E+00 | 2.81E-17 | 3.45E-16 |
| ENSG00000137809 | ITGA11   | -2.90E+00 | 3.22E-17 | 3.95E-16 |
| ENSG00000138698 | RAP1GDS1 | -2.51E+00 | 3.27E-17 | 4.00E-16 |
| ENSG00000183098 | GPC6     | -3.72E+00 | 3.32E-17 | 4.05E-16 |
| ENSG00000077348 | EXOSC5   | -2.57E+00 | 3.67E-17 | 4.47E-16 |
| ENSG00000145623 | OSMR     | -1.92E+00 | 3.93E-17 | 4.78E-16 |
| ENSG00000173638 | SLC19A1  | -1.65E+00 | 4.57E-17 | 5.53E-16 |
| ENSG00000213186 | TRIM59   | -1.81E+00 | 5.60E-17 | 6.77E-16 |
| ENSG00000142676 | RPL11    | -1.25E+00 | 6.19E-17 | 7.46E-16 |
| ENSG00000159593 | NAE1     | -1.02E+00 | 6.20E-17 | 7.46E-16 |
| ENSG00000146648 | EGFR     | -1.73E+00 | 6.31E-17 | 7.59E-16 |
| ENSG00000139514 | SLC7A1   | -1.80E+00 | 6.63E-17 | 7.97E-16 |
| ENSG00000118418 | HMG3     | -1.67E+00 | 7.12E-17 | 8.54E-16 |
| ENSG00000112578 | BYSL     | -1.37E+00 | 7.18E-17 | 8.60E-16 |
| ENSG00000169715 | MT1E     | -2.64E+00 | 8.37E-17 | 9.97E-16 |
| ENSG00000102144 | PGK1     | -1.20E+00 | 8.90E-17 | 1.06E-15 |

|                 |             |           |          |          |
|-----------------|-------------|-----------|----------|----------|
| ENSG00000163874 | ZC3H12A     | -1.63E+00 | 9.00E-17 | 1.07E-15 |
| ENSG00000109861 | CTSC        | -2.22E+00 | 9.05E-17 | 1.07E-15 |
| ENSG00000156103 | MMP16       | -2.38E+00 | 9.11E-17 | 1.08E-15 |
| ENSG00000072840 | EVC         | -2.12E+00 | 1.05E-16 | 1.24E-15 |
| ENSG00000084774 | CAD         | -2.30E+00 | 1.14E-16 | 1.34E-15 |
| ENSG00000153714 | LURAP1L     | -2.54E+00 | 1.15E-16 | 1.35E-15 |
| ENSG00000198830 | HMG2        | -1.50E+00 | 1.23E-16 | 1.44E-15 |
| ENSG00000187193 | MT1X        | -1.74E+00 | 1.35E-16 | 1.58E-15 |
| ENSG00000138035 | PNPT1       | -1.71E+00 | 1.55E-16 | 1.80E-15 |
| ENSG00000080200 | CRYBG3      | -1.77E+00 | 1.67E-16 | 1.93E-15 |
| ENSG00000082516 | GEMIN5      | -1.81E+00 | 1.80E-16 | 2.08E-15 |
| ENSG00000139684 | ESD         | -1.55E+00 | 2.06E-16 | 2.37E-15 |
| ENSG00000103485 | QPRT        | -1.96E+00 | 2.13E-16 | 2.45E-15 |
| ENSG00000108688 | CCL7        | -7.83E+00 | 2.21E-16 | 2.53E-15 |
| ENSG00000139146 | SINHCAF     | -1.86E+00 | 2.21E-16 | 2.53E-15 |
| ENSG00000122873 | CISD1       | -1.26E+00 | 2.37E-16 | 2.71E-15 |
| ENSG00000261236 | BOP1        | -1.37E+00 | 2.54E-16 | 2.90E-15 |
| ENSG00000170425 | ADORA2B     | -1.48E+00 | 2.94E-16 | 3.34E-15 |
| ENSG00000226950 | DANCR       | -2.50E+00 | 3.02E-16 | 3.43E-15 |
| ENSG00000176697 | BDNF        | -2.02E+00 | 3.09E-16 | 3.50E-15 |
| ENSG00000120158 | RCL1        | -1.59E+00 | 3.12E-16 | 3.54E-15 |
| ENSG00000143507 | DUSP10      | -2.90E+00 | 3.17E-16 | 3.58E-15 |
| ENSG00000056097 | ZFR         | -1.10E+00 | 3.19E-16 | 3.61E-15 |
| ENSG00000090447 | TFAP4       | -3.26E+00 | 3.40E-16 | 3.84E-15 |
| ENSG00000182952 | HMG2        | -1.42E+00 | 3.41E-16 | 3.85E-15 |
| ENSG00000137547 | MRPL15      | -1.54E+00 | 3.62E-16 | 4.07E-15 |
| ENSG00000180616 | SSTR2       | -6.16E+00 | 3.68E-16 | 4.14E-15 |
| ENSG00000106305 | AIMP2       | -1.32E+00 | 3.73E-16 | 4.19E-15 |
| ENSG00000172986 | GXYLT2      | -3.38E+00 | 3.78E-16 | 4.24E-15 |
| ENSG00000160208 | RRP1B       | -1.11E+00 | 3.96E-16 | 4.43E-15 |
| ENSG00000115368 | WDR75       | -1.67E+00 | 4.40E-16 | 4.91E-15 |
| ENSG00000150760 | DOCK1       | -1.41E+00 | 5.01E-16 | 5.58E-15 |
| ENSG00000116285 | ERRF1       | -1.15E+00 | 5.03E-16 | 5.61E-15 |
| ENSG00000186470 | BTN3A2      | -1.83E+00 | 5.43E-16 | 6.03E-15 |
| ENSG00000080986 | NDC80       | -1.69E+00 | 5.46E-16 | 6.06E-15 |
| ENSG00000213390 | ARHGAP19    | -2.62E+00 | 6.32E-16 | 6.98E-15 |
| ENSG00000172965 | MIR4435-2HG | -1.76E+00 | 6.63E-16 | 7.31E-15 |
| ENSG00000138363 | ATIC        | -1.14E+00 | 7.09E-16 | 7.79E-15 |
| ENSG00000270885 | RASL10B     | -3.31E+00 | 7.69E-16 | 8.43E-15 |
| ENSG00000117592 | PRDX6       | -1.10E+00 | 7.82E-16 | 8.56E-15 |
| ENSG00000109320 | NFKB1       | -1.40E+00 | 8.16E-16 | 8.93E-15 |
| ENSG00000120318 | ARAP3       | -3.30E+00 | 8.47E-16 | 9.26E-15 |
| ENSG00000108651 | UTP6        | -1.05E+00 | 8.91E-16 | 9.73E-15 |
| ENSG00000183207 | RUVBL2      | -1.17E+00 | 9.67E-16 | 1.05E-14 |
| ENSG00000133706 | LARS        | -1.57E+00 | 1.01E-15 | 1.10E-14 |

|                 |          |           |          |          |
|-----------------|----------|-----------|----------|----------|
| ENSG00000065809 | FAM107B  | -1.79E+00 | 1.04E-15 | 1.13E-14 |
| ENSG00000173511 | VEGFB    | -2.39E+00 | 1.11E-15 | 1.21E-14 |
| ENSG00000188846 | RPL14    | -1.26E+00 | 1.15E-15 | 1.24E-14 |
| ENSG00000135414 | GDF11    | -2.36E+00 | 1.15E-15 | 1.25E-14 |
| ENSG00000117395 | EBNA1BP2 | -1.39E+00 | 1.22E-15 | 1.32E-14 |
| ENSG00000105186 | ANKRD27  | -1.84E+00 | 1.26E-15 | 1.36E-14 |
| ENSG00000197061 | HIST1H4C | -3.05E+00 | 1.42E-15 | 1.53E-14 |
| ENSG00000008282 | SYPL1    | -1.17E+00 | 1.45E-15 | 1.56E-14 |
| ENSG00000058804 | NDC1     | -1.48E+00 | 1.62E-15 | 1.74E-14 |
| ENSG00000143499 | SMYD2    | -3.13E+00 | 1.66E-15 | 1.78E-14 |
| ENSG00000134138 | MEIS2    | -1.18E+00 | 1.76E-15 | 1.88E-14 |
| ENSG00000177119 | ANO6     | -1.14E+00 | 1.84E-15 | 1.97E-14 |
| ENSG00000077044 | DGKD     | -1.49E+00 | 1.88E-15 | 2.00E-14 |
| ENSG00000171302 | CANT1    | -1.35E+00 | 1.98E-15 | 2.11E-14 |
| ENSG00000143179 | UCK2     | -1.40E+00 | 2.15E-15 | 2.28E-14 |
| ENSG00000125743 | SNRPD2   | -2.43E+00 | 2.38E-15 | 2.52E-14 |
| ENSG00000105854 | PON2     | -1.02E+00 | 2.41E-15 | 2.56E-14 |
| ENSG00000198015 | MRPL42   | -1.15E+00 | 2.59E-15 | 2.73E-14 |
| ENSG00000135549 | PKIB     | -3.18E+00 | 2.62E-15 | 2.77E-14 |
| ENSG00000089157 | RPLP0    | -1.26E+00 | 2.77E-15 | 2.92E-14 |
| ENSG00000066583 | ISOC1    | -2.00E+00 | 2.78E-15 | 2.93E-14 |
| ENSG00000100426 | ZBED4    | -2.44E+00 | 2.80E-15 | 2.95E-14 |
| ENSG00000120800 | UTP20    | -1.81E+00 | 2.94E-15 | 3.09E-14 |
| ENSG00000173391 | OLR1     | -2.86E+00 | 3.01E-15 | 3.17E-14 |
| ENSG00000126749 | EMG1     | -1.62E+00 | 3.42E-15 | 3.59E-14 |
| ENSG00000100462 | PRMT5    | -1.41E+00 | 3.49E-15 | 3.66E-14 |
| ENSG00000186187 | ZNRF1    | -1.18E+00 | 3.61E-15 | 3.78E-14 |
| ENSG00000087095 | NLK      | -1.29E+00 | 3.92E-15 | 4.10E-14 |
| ENSG00000065923 | SLC9A7   | -2.25E+00 | 4.01E-15 | 4.18E-14 |
| ENSG00000203668 | CHML     | -1.56E+00 | 4.12E-15 | 4.30E-14 |
| ENSG00000139793 | MBNL2    | -1.54E+00 | 4.14E-15 | 4.32E-14 |
| ENSG00000160767 | FAM189B  | -1.61E+00 | 4.49E-15 | 4.67E-14 |
| ENSG00000179115 | FARSA    | -1.12E+00 | 4.72E-15 | 4.90E-14 |
| ENSG00000143815 | LBR      | -1.06E+00 | 4.75E-15 | 4.93E-14 |
| ENSG00000155115 | GTF3C6   | -1.10E+00 | 5.47E-15 | 5.66E-14 |
| ENSG00000184887 | BTBD6    | -1.61E+00 | 5.55E-15 | 5.73E-14 |
| ENSG00000164292 | RHOBTB3  | -1.77E+00 | 6.13E-15 | 6.30E-14 |
| ENSG00000154122 | ANKH     | -1.33E+00 | 6.24E-15 | 6.41E-14 |
| ENSG00000149313 | AASDHPPT | -1.32E+00 | 6.36E-15 | 6.53E-14 |
| ENSG00000154277 | UCHL1    | -1.11E+00 | 6.56E-15 | 6.73E-14 |
| ENSG00000112742 | TTK      | -1.25E+00 | 7.31E-15 | 7.47E-14 |
| ENSG00000113448 | PDE4D    | -1.79E+00 | 7.72E-15 | 7.89E-14 |
| ENSG00000204628 | RACK1    | -1.39E+00 | 8.00E-15 | 8.15E-14 |
| ENSG00000169554 | ZEB2     | -2.00E+00 | 8.09E-15 | 8.23E-14 |
| ENSG00000113594 | LIFR     | -2.16E+00 | 8.10E-15 | 8.24E-14 |

|                 |          |           |          |          |
|-----------------|----------|-----------|----------|----------|
| ENSG00000073060 | SCARB1   | -1.36E+00 | 8.11E-15 | 8.24E-14 |
| ENSG00000118257 | NRP2     | -1.72E+00 | 9.34E-15 | 9.45E-14 |
| ENSG00000105810 | CDK6     | -1.27E+00 | 9.70E-15 | 9.80E-14 |
| ENSG00000198522 | GPN1     | -1.48E+00 | 9.73E-15 | 9.82E-14 |
| ENSG00000079819 | EPB41L2  | -1.52E+00 | 1.03E-14 | 1.03E-13 |
| ENSG00000135111 | TBX3     | -1.29E+00 | 1.12E-14 | 1.12E-13 |
| ENSG00000111859 | NEDD9    | -2.06E+00 | 1.18E-14 | 1.18E-13 |
| ENSG00000162851 | TFB2M    | -2.10E+00 | 1.18E-14 | 1.18E-13 |
| ENSG00000150990 | DHX37    | -1.25E+00 | 1.22E-14 | 1.22E-13 |
| ENSG00000102390 | PBDC1    | -1.24E+00 | 1.23E-14 | 1.22E-13 |
| ENSG00000107249 | GLIS3    | -1.86E+00 | 1.25E-14 | 1.25E-13 |
| ENSG00000100823 | APEX1    | -1.20E+00 | 1.27E-14 | 1.26E-13 |
| ENSG00000043514 | TRIT1    | -2.41E+00 | 1.37E-14 | 1.36E-13 |
| ENSG00000116830 | TTF2     | -1.89E+00 | 1.50E-14 | 1.49E-13 |
| ENSG00000071575 | TRIB2    | -3.95E+00 | 1.50E-14 | 1.49E-13 |
| ENSG00000135372 | NAT10    | -1.30E+00 | 1.71E-14 | 1.68E-13 |
| ENSG00000020256 | ZFP64    | -1.09E+00 | 1.72E-14 | 1.70E-13 |
| ENSG00000164054 | SHISA5   | -1.04E+00 | 1.86E-14 | 1.83E-13 |
| ENSG00000221869 | CEBPD    | -2.04E+00 | 1.94E-14 | 1.90E-13 |
| ENSG00000253276 | CCDC71L  | -1.28E+00 | 1.94E-14 | 1.90E-13 |
| ENSG00000138430 | OLA1     | -1.02E+00 | 2.39E-14 | 2.32E-13 |
| ENSG00000173588 | CEP83    | -1.70E+00 | 2.39E-14 | 2.32E-13 |
| ENSG00000180370 | PAK2     | -1.05E+00 | 2.46E-14 | 2.38E-13 |
| ENSG00000108679 | LGALS3BP | -1.24E+00 | 2.56E-14 | 2.47E-13 |
| ENSG00000163069 | SGCB     | -1.03E+00 | 2.63E-14 | 2.54E-13 |
| ENSG00000179241 | LDLRAD3  | -3.40E+00 | 2.63E-14 | 2.54E-13 |
| ENSG00000141384 | TAF4B    | -2.86E+00 | 2.90E-14 | 2.79E-13 |
| ENSG00000127863 | TNFRSF19 | -3.68E+00 | 2.90E-14 | 2.79E-13 |
| ENSG00000184357 | HIST1H1B | -2.84E+00 | 3.08E-14 | 2.95E-13 |
| ENSG00000197894 | ADH5     | -1.22E+00 | 3.14E-14 | 3.01E-13 |
| ENSG00000115419 | GLS      | -1.29E+00 | 3.75E-14 | 3.58E-13 |
| ENSG00000241343 | RPL36A   | -1.94E+00 | 4.22E-14 | 4.01E-13 |
| ENSG00000164305 | CASP3    | -1.26E+00 | 4.71E-14 | 4.46E-13 |
| ENSG00000066697 | MSANTD3  | -1.46E+00 | 4.80E-14 | 4.54E-13 |
| ENSG00000138190 | EXOC6    | -2.18E+00 | 4.86E-14 | 4.59E-13 |
| ENSG00000124784 | RIOK1    | -1.40E+00 | 5.21E-14 | 4.91E-13 |
| ENSG00000113645 | WWC1     | -2.04E+00 | 5.51E-14 | 5.19E-13 |
| ENSG00000183010 | PYCR1    | -2.21E+00 | 6.03E-14 | 5.67E-13 |
| ENSG00000146416 | AIG1     | -2.30E+00 | 7.03E-14 | 6.57E-13 |
| ENSG00000138442 | WDR12    | -1.40E+00 | 8.12E-14 | 7.57E-13 |
| ENSG00000183386 | FHL3     | -1.56E+00 | 8.15E-14 | 7.59E-13 |
| ENSG00000112208 | BAG2     | -1.51E+00 | 9.20E-14 | 8.53E-13 |
| ENSG00000147874 | HAUS6    | -1.13E+00 | 9.51E-14 | 8.81E-13 |
| ENSG00000137054 | POLR1E   | -1.13E+00 | 9.70E-14 | 8.99E-13 |
| ENSG00000165915 | SLC39A13 | -1.86E+00 | 1.01E-13 | 9.33E-13 |



|                 |          |           |          |          |
|-----------------|----------|-----------|----------|----------|
| ENSG00000165506 | DNAAF2   | -1.86E+00 | 1.09E-13 | 1.01E-12 |
| ENSG00000106344 | RBM28    | -1.16E+00 | 1.10E-13 | 1.01E-12 |
| ENSG00000139354 | GAS2L3   | -1.89E+00 | 1.25E-13 | 1.15E-12 |
| ENSG00000101158 | NELFCD   | -1.07E+00 | 1.27E-13 | 1.17E-12 |
| ENSG00000166347 | CYB5A    | -2.06E+00 | 1.31E-13 | 1.20E-12 |
| ENSG00000226479 | TMEM185B | -1.49E+00 | 1.33E-13 | 1.21E-12 |
| ENSG00000135390 | ATP5MC2  | -2.37E+00 | 1.41E-13 | 1.29E-12 |
| ENSG00000089057 | SLC23A2  | -1.77E+00 | 1.43E-13 | 1.31E-12 |
| ENSG00000176105 | YES1     | -1.07E+00 | 1.68E-13 | 1.52E-12 |
| ENSG00000005249 | PRKAR2B  | -2.04E+00 | 2.46E-13 | 2.21E-12 |
| ENSG00000164949 | GEM      | -3.92E+00 | 2.60E-13 | 2.33E-12 |
| ENSG00000100105 | PATZ1    | -2.02E+00 | 2.69E-13 | 2.41E-12 |
| ENSG00000154845 | PPP4R1   | -1.29E+00 | 2.82E-13 | 2.52E-12 |
| ENSG00000126787 | DLGAP5   | -1.22E+00 | 2.90E-13 | 2.59E-12 |
| ENSG00000151338 | MIPOL1   | -1.88E+00 | 3.00E-13 | 2.68E-12 |
| ENSG00000118965 | WDR35    | -2.52E+00 | 3.03E-13 | 2.70E-12 |
| ENSG00000154743 | TSEN2    | -2.20E+00 | 3.07E-13 | 2.73E-12 |
| ENSG00000044090 | CUL7     | -1.91E+00 | 3.11E-13 | 2.77E-12 |
| ENSG00000104356 | POP1     | -1.20E+00 | 3.27E-13 | 2.91E-12 |
| ENSG00000110104 | CCDC86   | -1.57E+00 | 3.41E-13 | 3.02E-12 |
| ENSG00000180694 | TMEM64   | -1.59E+00 | 3.45E-13 | 3.06E-12 |
| ENSG00000198176 | TFDP1    | -1.03E+00 | 3.65E-13 | 3.23E-12 |
| ENSG00000164741 | DLC1     | -1.11E+00 | 3.65E-13 | 3.23E-12 |
| ENSG00000230629 | RPS23P8  | -1.46E+00 | 4.34E-13 | 3.82E-12 |
| ENSG00000149273 | RPS3     | -1.38E+00 | 4.84E-13 | 4.25E-12 |
| ENSG00000198417 | MT1F     | -5.70E+00 | 4.98E-13 | 4.37E-12 |
| ENSG00000197601 | FAR1     | -1.13E+00 | 5.30E-13 | 4.63E-12 |
| ENSG00000042062 | RIPOR3   | -3.86E+00 | 5.87E-13 | 5.12E-12 |
| ENSG00000203666 | EFCAB2   | -1.66E+00 | 6.18E-13 | 5.38E-12 |
| ENSG00000109189 | USP46    | -1.74E+00 | 6.47E-13 | 5.63E-12 |
| ENSG00000160124 | CCDC58   | -1.22E+00 | 6.65E-13 | 5.78E-12 |
| ENSG00000197045 | GMFB     | -1.15E+00 | 6.86E-13 | 5.95E-12 |
| ENSG00000151012 | SLC7A11  | -1.72E+00 | 7.44E-13 | 6.44E-12 |
| ENSG00000116337 | AMPD2    | -1.68E+00 | 7.68E-13 | 6.64E-12 |
| ENSG00000105677 | TMEM147  | -1.46E+00 | 8.56E-13 | 7.36E-12 |
| ENSG00000239900 | ADSL     | -2.47E+00 | 8.56E-13 | 7.36E-12 |
| ENSG00000065882 | TBC1D1   | -1.17E+00 | 8.70E-13 | 7.46E-12 |
| ENSG00000178776 | C5orf46  | -4.28E+00 | 8.73E-13 | 7.49E-12 |
| ENSG00000167088 | SNRPD1   | -1.51E+00 | 9.05E-13 | 7.75E-12 |
| ENSG00000147650 | LRP12    | -1.29E+00 | 9.13E-13 | 7.82E-12 |
| ENSG00000027697 | IFNGR1   | -1.07E+00 | 9.34E-13 | 7.99E-12 |
| ENSG00000023909 | GCLM     | -1.06E+00 | 9.34E-13 | 7.99E-12 |
| ENSG00000135070 | ISCA1    | -1.25E+00 | 9.41E-13 | 8.04E-12 |
| ENSG00000157557 | ETS2     | -1.53E+00 | 9.66E-13 | 8.23E-12 |
| ENSG00000196204 | RNF216P1 | -1.95E+00 | 9.78E-13 | 8.33E-12 |

|                 |          |           |          |          |
|-----------------|----------|-----------|----------|----------|
| ENSG00000118193 | KIF14    | -1.33E+00 | 9.92E-13 | 8.44E-12 |
| ENSG00000104343 | UBE2W    | -1.30E+00 | 1.15E-12 | 9.77E-12 |
| ENSG00000080819 | CPOX     | -1.12E+00 | 1.18E-12 | 9.97E-12 |
| ENSG00000196497 | IPO4     | -2.81E+00 | 1.19E-12 | 1.00E-11 |
| ENSG00000137513 | NARS2    | -2.46E+00 | 1.20E-12 | 1.01E-11 |
| ENSG00000142207 | URB1     | -1.58E+00 | 1.33E-12 | 1.12E-11 |
| ENSG00000163872 | YEATS2   | -1.95E+00 | 1.35E-12 | 1.13E-11 |
| ENSG00000112983 | BRD8     | -1.15E+00 | 1.35E-12 | 1.13E-11 |
| ENSG00000156469 | MTERF3   | -1.60E+00 | 1.36E-12 | 1.14E-11 |
| ENSG00000011295 | TTC19    | -1.19E+00 | 1.38E-12 | 1.15E-11 |
| ENSG00000113048 | MRPS27   | -1.07E+00 | 1.41E-12 | 1.18E-11 |
| ENSG00000134287 | ARF3     | -1.20E+00 | 1.42E-12 | 1.19E-11 |
| ENSG00000205084 | TMEM231  | -1.97E+00 | 1.48E-12 | 1.24E-11 |
| ENSG00000158234 | FAIM     | -1.64E+00 | 1.55E-12 | 1.29E-11 |
| ENSG00000180198 | RCC1     | -1.26E+00 | 1.58E-12 | 1.32E-11 |
| ENSG00000161013 | MGAT4B   | -1.13E+00 | 1.71E-12 | 1.43E-11 |
| ENSG00000104856 | RELB     | -1.31E+00 | 1.78E-12 | 1.48E-11 |
| ENSG00000103353 | UBFD1    | -1.05E+00 | 1.83E-12 | 1.52E-11 |
| ENSG00000103356 | EARS2    | -1.41E+00 | 2.02E-12 | 1.68E-11 |
| ENSG00000103494 | RPGRIP1L | -1.58E+00 | 2.45E-12 | 2.02E-11 |
| ENSG00000126249 | PDCD2L   | -2.12E+00 | 2.95E-12 | 2.42E-11 |
| ENSG00000104219 | ZDHHC2   | -2.53E+00 | 3.15E-12 | 2.58E-11 |
| ENSG00000182963 | GJC1     | -1.02E+00 | 3.28E-12 | 2.67E-11 |
| ENSG00000164040 | PGRMC2   | -1.10E+00 | 3.38E-12 | 2.75E-11 |
| ENSG00000093010 | COMT     | -1.34E+00 | 3.52E-12 | 2.86E-11 |
| ENSG00000151790 | TDO2     | -5.65E+00 | 3.54E-12 | 2.87E-11 |
| ENSG00000151304 | SRFBP1   | -1.31E+00 | 3.65E-12 | 2.96E-11 |
| ENSG00000111145 | ELK3     | -1.08E+00 | 3.83E-12 | 3.11E-11 |
| ENSG00000196968 | FUT11    | -1.30E+00 | 3.97E-12 | 3.21E-11 |
| ENSG00000104964 | TLE5     | -1.20E+00 | 4.18E-12 | 3.37E-11 |
| ENSG00000129347 | KRI1     | -1.05E+00 | 4.27E-12 | 3.44E-11 |
| ENSG00000089685 | BIRC5    | -1.24E+00 | 4.30E-12 | 3.47E-11 |
| ENSG00000164904 | ALDH7A1  | -1.16E+00 | 4.74E-12 | 3.81E-11 |
| ENSG00000160193 | WDR4     | -1.46E+00 | 4.79E-12 | 3.85E-11 |
| ENSG00000151576 | QTRT2    | -1.05E+00 | 4.83E-12 | 3.89E-11 |
| ENSG00000182979 | MTA1     | -1.73E+00 | 4.93E-12 | 3.96E-11 |
| ENSG00000131747 | TOP2A    | -1.30E+00 | 5.10E-12 | 4.08E-11 |
| ENSG00000018510 | AGPS     | -1.12E+00 | 5.13E-12 | 4.10E-11 |
| ENSG00000168785 | TSPAN5   | -1.30E+00 | 5.44E-12 | 4.35E-11 |
| ENSG00000072756 | TRNT1    | -1.68E+00 | 5.70E-12 | 4.54E-11 |
| ENSG00000165283 | STOML2   | -1.24E+00 | 5.81E-12 | 4.63E-11 |
| ENSG00000133169 | BEX1     | -2.03E+00 | 5.95E-12 | 4.73E-11 |
| ENSG00000058600 | POLR3E   | -1.41E+00 | 6.07E-12 | 4.82E-11 |
| ENSG00000026508 | CD44     | -1.49E+00 | 6.09E-12 | 4.84E-11 |
| ENSG00000174136 | RGMB     | -1.70E+00 | 6.62E-12 | 5.24E-11 |

|                 |            |           |          |          |
|-----------------|------------|-----------|----------|----------|
| ENSG00000048991 | R3HDM1     | -1.42E+00 | 6.71E-12 | 5.31E-11 |
| ENSG00000142102 | PGGHG      | -5.69E+00 | 7.24E-12 | 5.71E-11 |
| ENSG00000204576 | PRR3       | -1.70E+00 | 7.48E-12 | 5.90E-11 |
| ENSG00000185634 | SHC4       | -4.05E+00 | 7.50E-12 | 5.91E-11 |
| ENSG00000214706 | IFRD2      | -1.03E+00 | 8.08E-12 | 6.35E-11 |
| ENSG00000112175 | BMP5       | -5.06E+00 | 8.83E-12 | 6.92E-11 |
| ENSG00000145536 | ADAMTS16   | -2.35E+00 | 9.20E-12 | 7.19E-11 |
| ENSG00000082512 | TRAF5      | -2.85E+00 | 9.38E-12 | 7.32E-11 |
| ENSG00000138160 | KIF11      | -1.46E+00 | 1.04E-11 | 8.07E-11 |
| ENSG00000117877 | CD3EAP     | -1.14E+00 | 1.05E-11 | 8.19E-11 |
| ENSG00000164647 | STEAP1     | -3.87E+00 | 1.17E-11 | 9.06E-11 |
| ENSG00000157168 | NRG1       | -1.21E+00 | 1.20E-11 | 9.29E-11 |
| ENSG00000166326 | TRIM44     | -1.01E+00 | 1.21E-11 | 9.34E-11 |
| ENSG00000173085 | COQ2       | -1.27E+00 | 1.28E-11 | 9.87E-11 |
| ENSG00000148303 | RPL7A      | -1.04E+00 | 1.29E-11 | 9.92E-11 |
| ENSG00000153989 | NUS1       | -1.59E+00 | 1.29E-11 | 9.92E-11 |
| ENSG00000227057 | WDR46      | -1.08E+00 | 1.35E-11 | 1.04E-10 |
| ENSG00000148690 | FRA10AC1   | -1.02E+00 | 1.37E-11 | 1.06E-10 |
| ENSG00000165819 | METTL3     | -1.27E+00 | 1.43E-11 | 1.10E-10 |
| ENSG00000117724 | CENPF      | -1.30E+00 | 1.53E-11 | 1.18E-10 |
| ENSG00000140006 | WDR89      | -1.38E+00 | 1.54E-11 | 1.18E-10 |
| ENSG00000184992 | BRI3BP     | -1.00E+00 | 1.58E-11 | 1.21E-10 |
| ENSG00000086475 | SEPHS1     | -1.07E+00 | 1.62E-11 | 1.24E-10 |
| ENSG00000153976 | HS3ST3A1   | -3.46E+00 | 1.63E-11 | 1.25E-10 |
| ENSG00000269190 | FBXO17     | -1.73E+00 | 1.65E-11 | 1.26E-10 |
| ENSG00000076554 | TPD52      | -1.58E+00 | 1.68E-11 | 1.28E-10 |
| ENSG00000123143 | PKN1       | -1.07E+00 | 1.69E-11 | 1.29E-10 |
| ENSG00000159228 | CBR1       | -1.35E+00 | 1.76E-11 | 1.34E-10 |
| ENSG00000044459 | CNTLN      | -1.14E+00 | 1.85E-11 | 1.41E-10 |
| ENSG00000116962 | NID1       | -1.55E+00 | 1.87E-11 | 1.42E-10 |
| ENSG00000145012 | LPP        | -1.17E+00 | 1.90E-11 | 1.44E-10 |
| ENSG00000099999 | RNF215     | -3.83E+00 | 1.97E-11 | 1.49E-10 |
| ENSG00000047932 | GOPC       | -1.25E+00 | 1.99E-11 | 1.51E-10 |
| ENSG00000125817 | CENPB      | -1.03E+00 | 2.08E-11 | 1.57E-10 |
| ENSG00000133816 | MICAL2     | -1.01E+00 | 2.11E-11 | 1.59E-10 |
| ENSG00000113273 | ARSB       | -1.73E+00 | 2.22E-11 | 1.67E-10 |
| ENSG00000163138 | PACRGL     | -1.88E+00 | 2.24E-11 | 1.69E-10 |
| ENSG00000132356 | PRKAA1     | -1.02E+00 | 2.36E-11 | 1.77E-10 |
| ENSG00000245648 | AC022075.1 | -2.05E+00 | 2.36E-11 | 1.77E-10 |
| ENSG00000164506 | STXBP5     | -1.15E+00 | 2.42E-11 | 1.81E-10 |
| ENSG00000186687 | LYRM7      | -2.24E+00 | 2.49E-11 | 1.86E-10 |
| ENSG00000168298 | HIST1H1E   | -2.33E+00 | 2.58E-11 | 1.93E-10 |
| ENSG00000116005 | PCYOX1     | -1.09E+00 | 2.60E-11 | 1.94E-10 |
| ENSG00000133107 | TRPC4      | -2.13E+00 | 2.61E-11 | 1.95E-10 |
| ENSG00000073536 | NLE1       | -1.82E+00 | 2.76E-11 | 2.06E-10 |

|                 |          |           |          |          |
|-----------------|----------|-----------|----------|----------|
| ENSG00000070718 | AP3M2    | -1.07E+00 | 3.04E-11 | 2.26E-10 |
| ENSG00000144354 | CDCA7    | -1.53E+00 | 3.04E-11 | 2.26E-10 |
| ENSG00000070785 | EIF2B3   | -1.14E+00 | 3.34E-11 | 2.47E-10 |
| ENSG00000140694 | PARN     | -1.03E+00 | 3.42E-11 | 2.53E-10 |
| ENSG00000197043 | ANXA6    | -1.23E+00 | 3.74E-11 | 2.75E-10 |
| ENSG00000164346 | NSA2     | -1.06E+00 | 4.25E-11 | 3.12E-10 |
| ENSG00000023902 | PLEKHO1  | -1.36E+00 | 4.43E-11 | 3.24E-10 |
| ENSG00000109674 | NEIL3    | -1.70E+00 | 4.53E-11 | 3.31E-10 |
| ENSG00000168002 | POLR2G   | -1.38E+00 | 4.53E-11 | 3.31E-10 |
| ENSG00000110700 | RPS13    | -1.29E+00 | 4.63E-11 | 3.38E-10 |
| ENSG00000131844 | MCCC2    | -1.28E+00 | 4.75E-11 | 3.46E-10 |
| ENSG00000144043 | TEX261   | -1.03E+00 | 4.85E-11 | 3.53E-10 |
| ENSG00000181634 | TNFSF15  | -5.69E+00 | 4.90E-11 | 3.57E-10 |
| ENSG00000124575 | HIST1H1D | -1.60E+00 | 5.25E-11 | 3.81E-10 |
| ENSG00000086712 | TXLNG    | -1.01E+00 | 5.51E-11 | 4.00E-10 |
| ENSG00000039123 | MTREX    | -1.16E+00 | 5.64E-11 | 4.09E-10 |
| ENSG00000123213 | NLN      | -2.38E+00 | 6.12E-11 | 4.43E-10 |
| ENSG00000165030 | NFIL3    | -1.71E+00 | 6.34E-11 | 4.58E-10 |
| ENSG00000143995 | MEIS1    | -3.73E+00 | 6.64E-11 | 4.79E-10 |
| ENSG00000197555 | SIPA1L1  | -1.21E+00 | 6.94E-11 | 4.99E-10 |
| ENSG00000177697 | CD151    | -1.49E+00 | 7.40E-11 | 5.30E-10 |
| ENSG00000101189 | MRGBP    | -1.03E+00 | 7.65E-11 | 5.48E-10 |
| ENSG00000107438 | PDLIM1   | -1.28E+00 | 7.79E-11 | 5.57E-10 |
| ENSG00000166033 | HTRA1    | -2.13E+00 | 7.92E-11 | 5.66E-10 |
| ENSG00000151466 | SCLT1    | -1.20E+00 | 8.23E-11 | 5.87E-10 |
| ENSG00000104231 | ZFAND1   | -1.68E+00 | 8.30E-11 | 5.92E-10 |
| ENSG00000160803 | UBQLN4   | -1.59E+00 | 8.44E-11 | 6.01E-10 |
| ENSG00000111231 | GPN3     | -1.05E+00 | 9.78E-11 | 6.94E-10 |
| ENSG00000136522 | MRPL47   | -1.10E+00 | 9.92E-11 | 7.03E-10 |
| ENSG00000107815 | TWINK    | -1.43E+00 | 1.00E-10 | 7.10E-10 |
| ENSG00000211456 | SACM1L   | -1.00E+00 | 1.04E-10 | 7.34E-10 |
| ENSG00000116641 | DOCK7    | -1.48E+00 | 1.06E-10 | 7.51E-10 |
| ENSG00000113356 | POLR3G   | -1.35E+00 | 1.22E-10 | 8.55E-10 |
| ENSG00000204381 | LAYN     | -1.95E+00 | 1.30E-10 | 9.16E-10 |
| ENSG00000053372 | MRTO4    | -1.27E+00 | 1.31E-10 | 9.17E-10 |
| ENSG00000116679 | IVNS1ABP | -1.15E+00 | 1.35E-10 | 9.51E-10 |
| ENSG00000010803 | SCMH1    | -2.32E+00 | 1.36E-10 | 9.51E-10 |
| ENSG00000120738 | EGR1     | -2.29E+00 | 1.38E-10 | 9.68E-10 |
| ENSG00000188158 | NHS      | -3.25E+00 | 1.38E-10 | 9.69E-10 |
| ENSG00000121621 | KIF18A   | -1.35E+00 | 1.43E-10 | 1.00E-09 |
| ENSG00000117411 | B4GALT2  | -1.43E+00 | 1.46E-10 | 1.02E-09 |
| ENSG00000164611 | PTTG1    | -1.43E+00 | 1.49E-10 | 1.04E-09 |
| ENSG00000134072 | CAMK1    | -2.01E+00 | 1.65E-10 | 1.15E-09 |
| ENSG00000249669 | CARMN    | -2.58E+00 | 1.67E-10 | 1.16E-09 |
| ENSG00000120837 | NFYB     | -1.00E+00 | 1.72E-10 | 1.20E-09 |

|                 |            |           |          |          |
|-----------------|------------|-----------|----------|----------|
| ENSG00000272599 | AC016394.2 | -3.33E+00 | 1.84E-10 | 1.27E-09 |
| ENSG00000068097 | HEATR6     | -1.41E+00 | 1.88E-10 | 1.30E-09 |
| ENSG00000196876 | SCN8A      | -2.20E+00 | 1.97E-10 | 1.36E-09 |
| ENSG00000255737 | AGAP2-AS1  | -3.05E+00 | 1.97E-10 | 1.36E-09 |
| ENSG00000114391 | RPL24      | -1.07E+00 | 2.12E-10 | 1.46E-09 |
| ENSG00000175183 | CSRP2      | -1.54E+00 | 2.13E-10 | 1.47E-09 |
| ENSG00000105792 | CFAP69     | -3.52E+00 | 2.17E-10 | 1.50E-09 |
| ENSG00000171863 | RPS7       | -1.31E+00 | 2.19E-10 | 1.51E-09 |
| ENSG00000164167 | LSM6       | -1.28E+00 | 2.28E-10 | 1.57E-09 |
| ENSG00000003989 | SLC7A2     | -2.52E+00 | 2.32E-10 | 1.59E-09 |
| ENSG00000111144 | LTA4H      | -1.06E+00 | 2.34E-10 | 1.61E-09 |
| ENSG00000116001 | TIA1       | -1.26E+00 | 2.38E-10 | 1.63E-09 |
| ENSG00000118707 | TGIF2      | -1.27E+00 | 2.56E-10 | 1.76E-09 |
| ENSG00000070540 | WIPI1      | -2.52E+00 | 2.64E-10 | 1.81E-09 |
| ENSG00000139131 | YARS2      | -1.37E+00 | 2.72E-10 | 1.86E-09 |
| ENSG00000287151 | C2orf27A   | -2.64E+00 | 2.81E-10 | 1.91E-09 |
| ENSG00000104447 | TRPS1      | -1.69E+00 | 3.04E-10 | 2.06E-09 |
| ENSG00000257093 | DENND11    | -3.37E+00 | 3.10E-10 | 2.10E-09 |
| ENSG00000167747 | C19orf48   | -1.02E+00 | 3.11E-10 | 2.11E-09 |
| ENSG00000165271 | NOL6       | -1.45E+00 | 3.12E-10 | 2.12E-09 |
| ENSG00000137337 | MDC1       | -1.23E+00 | 3.18E-10 | 2.15E-09 |
| ENSG00000135446 | CDK4       | -1.29E+00 | 3.21E-10 | 2.17E-09 |
| ENSG00000166068 | SPRED1     | -1.15E+00 | 3.29E-10 | 2.22E-09 |
| ENSG00000071994 | PDCD2      | -1.15E+00 | 3.37E-10 | 2.28E-09 |
| ENSG00000092140 | G2E3       | -1.30E+00 | 3.50E-10 | 2.36E-09 |
| ENSG00000029153 | ARNTL2     | -1.09E+00 | 3.65E-10 | 2.46E-09 |
| ENSG00000234883 | MIR155HG   | -4.03E+00 | 3.71E-10 | 2.49E-09 |
| ENSG00000115318 | LOXL3      | -2.61E+00 | 3.83E-10 | 2.57E-09 |
| ENSG00000143156 | NME7       | -1.71E+00 | 4.22E-10 | 2.82E-09 |
| ENSG00000104164 | BLOC1S6    | -1.00E+00 | 4.39E-10 | 2.93E-09 |
| ENSG00000139239 | RPL14P1    | -1.31E+00 | 4.48E-10 | 2.99E-09 |
| ENSG00000144802 | NFKBIZ     | -1.07E+00 | 4.54E-10 | 3.03E-09 |
| ENSG00000166444 | ST5        | -1.60E+00 | 4.74E-10 | 3.16E-09 |
| ENSG00000174842 | GLMN       | -1.38E+00 | 4.98E-10 | 3.31E-09 |
| ENSG00000159216 | RUNX1      | -1.35E+00 | 4.99E-10 | 3.32E-09 |
| ENSG00000105948 | TTC26      | -1.50E+00 | 5.21E-10 | 3.46E-09 |
| ENSG00000232759 | AC002480.1 | -5.06E+00 | 5.34E-10 | 3.54E-09 |
| ENSG00000164024 | METAP1     | -1.07E+00 | 5.39E-10 | 3.57E-09 |
| ENSG00000271601 | LIX1L      | -1.14E+00 | 5.45E-10 | 3.61E-09 |
| ENSG00000143771 | CNIH4      | -1.46E+00 | 5.45E-10 | 3.61E-09 |
| ENSG00000205871 | RPS3AP47   | -1.21E+00 | 5.52E-10 | 3.65E-09 |
| ENSG00000114423 | CBLB       | -1.31E+00 | 5.65E-10 | 3.73E-09 |
| ENSG00000187240 | DYNC2H1    | -1.60E+00 | 5.93E-10 | 3.91E-09 |
| ENSG00000134851 | TMEM165    | -1.12E+00 | 5.96E-10 | 3.93E-09 |
| ENSG00000156017 | CARNMT1    | -1.21E+00 | 6.04E-10 | 3.97E-09 |

|                 |              |           |          |          |
|-----------------|--------------|-----------|----------|----------|
| ENSG00000035499 | DEPDC1B      | -1.37E+00 | 6.07E-10 | 3.99E-09 |
| ENSG00000148484 | RSU1         | -1.12E+00 | 6.50E-10 | 4.27E-09 |
| ENSG00000130713 | EXOSC2       | -1.22E+00 | 6.54E-10 | 4.29E-09 |
| ENSG00000152256 | PDK1         | -1.53E+00 | 7.30E-10 | 4.76E-09 |
| ENSG00000145819 | ARHGAP26     | -1.39E+00 | 7.38E-10 | 4.81E-09 |
| ENSG00000156398 | SFXN2        | -2.99E+00 | 7.44E-10 | 4.85E-09 |
| ENSG00000138778 | CENPE        | -1.35E+00 | 7.61E-10 | 4.96E-09 |
| ENSG00000254726 | MEX3A        | -1.10E+00 | 7.89E-10 | 5.13E-09 |
| ENSG00000104524 | PYCR3        | -2.17E+00 | 8.13E-10 | 5.28E-09 |
| ENSG00000121879 | PIK3CA       | -1.21E+00 | 8.99E-10 | 5.82E-09 |
| ENSG00000197442 | MAP3K5       | -2.11E+00 | 9.02E-10 | 5.83E-09 |
| ENSG00000059588 | TARBP1       | -1.64E+00 | 9.43E-10 | 6.09E-09 |
| ENSG00000119285 | HEATR1       | -1.43E+00 | 9.46E-10 | 6.10E-09 |
| ENSG00000174099 | MSRB3        | -1.08E+00 | 9.79E-10 | 6.30E-09 |
| ENSG00000072571 | HMMR         | -1.18E+00 | 1.16E-09 | 7.42E-09 |
| ENSG00000134480 | CCNH         | -1.38E+00 | 1.39E-09 | 8.83E-09 |
| ENSG00000005436 | GCFC2        | -1.23E+00 | 1.43E-09 | 9.08E-09 |
| ENSG00000152413 | HOMER1       | -1.55E+00 | 1.48E-09 | 9.39E-09 |
| ENSG00000066651 | TRMT11       | -1.17E+00 | 1.49E-09 | 9.40E-09 |
| ENSG00000115009 | CCL20        | -2.36E+00 | 1.55E-09 | 9.78E-09 |
| ENSG00000114739 | ACVR2B       | -2.56E+00 | 1.56E-09 | 9.82E-09 |
| ENSG00000168310 | IRF2         | -1.23E+00 | 1.61E-09 | 1.02E-08 |
| ENSG00000112414 | ADGRG6       | -1.22E+00 | 1.65E-09 | 1.04E-08 |
| ENSG00000005156 | LIG3         | -1.19E+00 | 1.66E-09 | 1.04E-08 |
| ENSG00000001084 | GCLC         | -1.68E+00 | 1.67E-09 | 1.05E-08 |
| ENSG00000065485 | PDIA5        | -1.10E+00 | 1.74E-09 | 1.09E-08 |
| ENSG00000100138 | SNU13        | -1.04E+00 | 1.78E-09 | 1.11E-08 |
| ENSG00000105926 | MPP6         | -1.15E+00 | 1.93E-09 | 1.21E-08 |
| ENSG00000139197 | PEX5         | -1.04E+00 | 1.96E-09 | 1.22E-08 |
| ENSG00000137502 | RAB30        | -1.73E+00 | 1.96E-09 | 1.23E-08 |
| ENSG00000133393 | FOPNL        | -1.14E+00 | 1.98E-09 | 1.24E-08 |
| ENSG00000107798 | LIPA         | -1.16E+00 | 2.03E-09 | 1.26E-08 |
| ENSG00000163002 | NUP35        | -1.21E+00 | 2.03E-09 | 1.27E-08 |
| ENSG00000123552 | USP45        | -1.50E+00 | 2.08E-09 | 1.29E-08 |
| ENSG00000116157 | GPX7         | -3.08E+00 | 2.16E-09 | 1.34E-08 |
| ENSG00000126790 | L3HYPDH      | -1.67E+00 | 2.22E-09 | 1.38E-08 |
| ENSG00000154310 | TNIK         | -1.63E+00 | 2.23E-09 | 1.38E-08 |
| ENSG00000143947 | RPS27A       | -1.23E+00 | 2.59E-09 | 1.60E-08 |
| ENSG00000154736 | ADAMTS5      | -3.88E+00 | 2.68E-09 | 1.66E-08 |
| ENSG00000134198 | TSPAN2       | -2.54E+00 | 2.71E-09 | 1.67E-08 |
| ENSG00000180357 | ZNF609       | -1.19E+00 | 2.92E-09 | 1.80E-08 |
| ENSG00000137331 | IER3         | -1.43E+00 | 3.00E-09 | 1.85E-08 |
| ENSG00000136010 | ALDH1L2      | -2.71E+00 | 3.03E-09 | 1.86E-08 |
| ENSG00000224032 | EPB41L4A-AS1 | -1.26E+00 | 3.05E-09 | 1.88E-08 |
| ENSG00000126767 | ELK1         | -1.08E+00 | 3.09E-09 | 1.90E-08 |

|                 |          |           |          |          |
|-----------------|----------|-----------|----------|----------|
| ENSG00000135763 | URB2     | -1.47E+00 | 3.27E-09 | 2.00E-08 |
| ENSG00000119865 | CNRIP1   | -1.26E+00 | 3.31E-09 | 2.03E-08 |
| ENSG00000134744 | TUT4     | -1.28E+00 | 3.32E-09 | 2.03E-08 |
| ENSG00000197646 | PDCD1LG2 | -3.47E+00 | 3.45E-09 | 2.11E-08 |
| ENSG00000146592 | CREB5    | -2.40E+00 | 3.48E-09 | 2.13E-08 |
| ENSG00000120833 | SOCS2    | -1.50E+00 | 3.78E-09 | 2.30E-08 |
| ENSG00000170365 | SMAD1    | -1.32E+00 | 3.78E-09 | 2.30E-08 |
| ENSG00000140280 | LYSMD2   | -2.40E+00 | 3.95E-09 | 2.40E-08 |
| ENSG00000102967 | DHODH    | -2.05E+00 | 4.06E-09 | 2.46E-08 |
| ENSG00000169105 | CHST14   | -1.17E+00 | 4.07E-09 | 2.47E-08 |
| ENSG00000117569 | PTBP2    | -2.08E+00 | 4.07E-09 | 2.47E-08 |
| ENSG00000005302 | MSL3     | -1.08E+00 | 4.23E-09 | 2.56E-08 |
| ENSG00000064393 | HIPK2    | -1.17E+00 | 4.38E-09 | 2.64E-08 |
| ENSG00000163378 | EOGT     | -1.54E+00 | 4.52E-09 | 2.72E-08 |
| ENSG00000125430 | HS3ST3B1 | -2.15E+00 | 4.91E-09 | 2.95E-08 |
| ENSG00000176907 | TCIM     | -5.58E+00 | 5.01E-09 | 3.00E-08 |
| ENSG00000024526 | DEPDC1   | -1.16E+00 | 5.48E-09 | 3.27E-08 |
| ENSG00000100196 | KDEL3    | -1.75E+00 | 5.56E-09 | 3.31E-08 |
| ENSG00000013619 | MAMLD1   | -2.29E+00 | 5.61E-09 | 3.34E-08 |
| ENSG00000147889 | CDKN2A   | -1.81E+00 | 5.63E-09 | 3.35E-08 |
| ENSG00000103257 | SLC7A5   | -1.04E+00 | 5.74E-09 | 3.41E-08 |
| ENSG00000135185 | TMEM243  | -1.64E+00 | 5.80E-09 | 3.45E-08 |
| ENSG00000172301 | COPRS    | -1.16E+00 | 5.80E-09 | 3.45E-08 |
| ENSG00000135480 | KRT7     | -2.62E+00 | 5.94E-09 | 3.52E-08 |
| ENSG00000196177 | ACADSB   | -2.10E+00 | 6.07E-09 | 3.60E-08 |
| ENSG00000135245 | HILPDA   | -1.56E+00 | 6.10E-09 | 3.62E-08 |
| ENSG00000086062 | B4GALT1  | -1.24E+00 | 6.22E-09 | 3.68E-08 |
| ENSG00000004139 | SARM1    | -1.49E+00 | 6.63E-09 | 3.92E-08 |
| ENSG00000187676 | B3GLCT   | -1.02E+00 | 6.93E-09 | 4.09E-08 |
| ENSG00000166780 | BMERB1   | -1.21E+00 | 6.96E-09 | 4.11E-08 |
| ENSG00000100625 | SIX4     | -1.56E+00 | 7.43E-09 | 4.37E-08 |
| ENSG00000205208 | C4orf46  | -1.27E+00 | 7.57E-09 | 4.45E-08 |
| ENSG00000134775 | FHOD3    | -3.71E+00 | 7.60E-09 | 4.47E-08 |
| ENSG00000187231 | SESTD1   | -1.23E+00 | 7.61E-09 | 4.47E-08 |
| ENSG00000197594 | ENPP1    | -2.20E+00 | 8.08E-09 | 4.74E-08 |
| ENSG00000176022 | B3GALT6  | -1.13E+00 | 8.60E-09 | 5.02E-08 |
| ENSG00000168116 | KIAA1586 | -1.26E+00 | 8.79E-09 | 5.13E-08 |
| ENSG00000092096 | SLC22A17 | -1.24E+00 | 9.50E-09 | 5.52E-08 |
| ENSG00000125691 | RPL23    | -1.32E+00 | 1.02E-08 | 5.92E-08 |
| ENSG00000141934 | PLPP2    | -1.46E+00 | 1.05E-08 | 6.09E-08 |
| ENSG00000064607 | SUGP2    | -1.01E+00 | 1.05E-08 | 6.10E-08 |
| ENSG00000122585 | NPY      | -3.56E+00 | 1.05E-08 | 6.10E-08 |
| ENSG00000182013 | PNMA8A   | -2.30E+00 | 1.07E-08 | 6.21E-08 |
| ENSG00000158985 | CDC42SE2 | -1.28E+00 | 1.08E-08 | 6.28E-08 |
| ENSG00000051825 | MPHOSPH9 | -1.39E+00 | 1.15E-08 | 6.62E-08 |

|                 |            |           |          |          |
|-----------------|------------|-----------|----------|----------|
| ENSG00000171262 | FAM98B     | -1.01E+00 | 1.18E-08 | 6.79E-08 |
| ENSG00000186908 | ZDHHC17    | -1.49E+00 | 1.18E-08 | 6.82E-08 |
| ENSG00000140577 | CRTC3      | -1.06E+00 | 1.19E-08 | 6.87E-08 |
| ENSG00000078401 | EDN1       | -2.10E+00 | 1.24E-08 | 7.15E-08 |
| ENSG00000115963 | RND3       | -1.20E+00 | 1.25E-08 | 7.17E-08 |
| ENSG00000235552 | RPL6P27    | -1.09E+00 | 1.26E-08 | 7.24E-08 |
| ENSG00000115073 | ACTR1B     | -1.23E+00 | 1.30E-08 | 7.46E-08 |
| ENSG00000066279 | ASPM       | -1.02E+00 | 1.30E-08 | 7.46E-08 |
| ENSG00000151458 | ANKRD50    | -1.52E+00 | 1.31E-08 | 7.53E-08 |
| ENSG00000165526 | RPUSD4     | -1.03E+00 | 1.40E-08 | 7.98E-08 |
| ENSG00000133121 | STARD13    | -2.30E+00 | 1.42E-08 | 8.10E-08 |
| ENSG00000073150 | PANX2      | -2.08E+00 | 1.48E-08 | 8.41E-08 |
| ENSG00000074319 | TSG101     | -1.06E+00 | 1.48E-08 | 8.43E-08 |
| ENSG00000104047 | DTWD1      | -1.17E+00 | 1.48E-08 | 8.45E-08 |
| ENSG00000143390 | RFX5       | -1.40E+00 | 1.49E-08 | 8.49E-08 |
| ENSG00000135451 | TROAP      | -1.27E+00 | 1.59E-08 | 9.02E-08 |
| ENSG00000099385 | BCL7C      | -1.74E+00 | 1.61E-08 | 9.16E-08 |
| ENSG00000196323 | ZBTB44     | -1.42E+00 | 1.62E-08 | 9.17E-08 |
| ENSG00000158122 | PRXL2C     | -1.99E+00 | 1.62E-08 | 9.21E-08 |
| ENSG00000254004 | ZNF260     | -1.22E+00 | 1.63E-08 | 9.22E-08 |
| ENSG00000182004 | SNRPE      | -1.45E+00 | 1.65E-08 | 9.33E-08 |
| ENSG00000224578 | HNRNPA1P48 | -1.59E+00 | 1.65E-08 | 9.36E-08 |
| ENSG00000169019 | COMMD8     | -1.22E+00 | 1.77E-08 | 9.98E-08 |
| ENSG00000107159 | CA9        | -4.24E+00 | 1.84E-08 | 1.04E-07 |
| ENSG00000108423 | TUBD1      | -1.11E+00 | 1.86E-08 | 1.05E-07 |
| ENSG00000101751 | POLI       | -2.99E+00 | 1.86E-08 | 1.05E-07 |
| ENSG00000157224 | CLDN12     | -1.45E+00 | 1.88E-08 | 1.06E-07 |
| ENSG00000198353 | HOXC4      | -1.43E+00 | 1.95E-08 | 1.10E-07 |
| ENSG00000240972 | MIF        | -2.03E+00 | 1.95E-08 | 1.10E-07 |
| ENSG00000145604 | SKP2       | -1.05E+00 | 1.98E-08 | 1.11E-07 |
| ENSG00000237976 | AL391069.2 | -5.04E+00 | 1.99E-08 | 1.12E-07 |
| ENSG00000143314 | MRPL24     | -1.50E+00 | 2.01E-08 | 1.13E-07 |
| ENSG00000152894 | PTPRK      | -1.02E+00 | 2.04E-08 | 1.14E-07 |
| ENSG00000149187 | CELF1      | -1.10E+00 | 2.13E-08 | 1.19E-07 |
| ENSG00000050344 | NFE2L3     | -1.64E+00 | 2.17E-08 | 1.21E-07 |
| ENSG00000163710 | PCOLCE2    | -1.31E+00 | 2.18E-08 | 1.22E-07 |
| ENSG00000278540 | ACACA      | -1.17E+00 | 2.25E-08 | 1.26E-07 |
| ENSG00000092208 | GEMIN2     | -1.17E+00 | 2.28E-08 | 1.27E-07 |
| ENSG00000076053 | RBM7       | -1.17E+00 | 2.32E-08 | 1.29E-07 |
| ENSG00000063587 | ZNF275     | -1.98E+00 | 2.33E-08 | 1.30E-07 |
| ENSG00000240476 | LINC00973  | -4.32E+00 | 2.40E-08 | 1.33E-07 |
| ENSG00000276293 | PIP4K2B    | -1.15E+00 | 2.42E-08 | 1.34E-07 |
| ENSG00000008324 | SS18L2     | -1.11E+00 | 2.47E-08 | 1.37E-07 |
| ENSG00000153574 | RPIA       | -1.01E+00 | 2.55E-08 | 1.41E-07 |
| ENSG00000132952 | USPL1      | -1.62E+00 | 2.60E-08 | 1.44E-07 |



|                 |            |           |          |          |
|-----------------|------------|-----------|----------|----------|
| ENSG00000181007 | ZFP82      | -1.41E+00 | 2.60E-08 | 1.44E-07 |
| ENSG00000156970 | BUB1B      | -1.20E+00 | 2.62E-08 | 1.45E-07 |
| ENSG00000146232 | NFKBIE     | -1.49E+00 | 2.69E-08 | 1.48E-07 |
| ENSG00000197299 | BLM        | -1.37E+00 | 2.76E-08 | 1.52E-07 |
| ENSG00000100526 | CDKN3      | -1.05E+00 | 2.87E-08 | 1.57E-07 |
| ENSG00000037897 | METTL1     | -1.69E+00 | 2.88E-08 | 1.58E-07 |
| ENSG00000185420 | SMYD3      | -1.32E+00 | 2.90E-08 | 1.59E-07 |
| ENSG00000159199 | ATP5MC1    | -1.77E+00 | 3.07E-08 | 1.68E-07 |
| ENSG00000150636 | CCDC102B   | -3.63E+00 | 3.09E-08 | 1.69E-07 |
| ENSG00000184924 | PTRHD1     | -1.54E+00 | 3.23E-08 | 1.76E-07 |
| ENSG00000123689 | G0S2       | -4.41E+00 | 3.30E-08 | 1.79E-07 |
| ENSG00000247626 | MARS2      | -2.83E+00 | 3.30E-08 | 1.79E-07 |
| ENSG00000136630 | HLX        | -2.56E+00 | 3.35E-08 | 1.82E-07 |
| ENSG00000232774 | AL355916.1 | -4.74E+00 | 3.49E-08 | 1.89E-07 |
| ENSG00000160446 | ZDHHC12    | -1.83E+00 | 3.52E-08 | 1.91E-07 |
| ENSG00000240225 | ZNF542P    | -1.03E+00 | 3.72E-08 | 2.01E-07 |
| ENSG00000101811 | CSTF2      | -1.03E+00 | 3.73E-08 | 2.02E-07 |
| ENSG00000136897 | MRPL50     | -1.04E+00 | 3.82E-08 | 2.06E-07 |
| ENSG00000171155 | C1GALT1C1  | -1.14E+00 | 3.93E-08 | 2.12E-07 |
| ENSG00000248008 | NRAV       | -2.34E+00 | 4.03E-08 | 2.17E-07 |
| ENSG00000135083 | CCNJL      | -2.37E+00 | 4.33E-08 | 2.33E-07 |
| ENSG00000151702 | FLI1       | -1.29E+00 | 4.67E-08 | 2.51E-07 |
| ENSG00000146950 | SHROOM2    | -2.55E+00 | 4.81E-08 | 2.58E-07 |
| ENSG00000109475 | RPL34      | -1.68E+00 | 5.25E-08 | 2.81E-07 |
| ENSG00000140386 | SCAPER     | -1.49E+00 | 5.49E-08 | 2.92E-07 |
| ENSG00000139343 | SNRPF      | -1.21E+00 | 5.64E-08 | 3.00E-07 |
| ENSG00000180228 | PRKRA      | -1.44E+00 | 5.68E-08 | 3.02E-07 |
| ENSG00000161179 | YDJC       | -1.63E+00 | 5.80E-08 | 3.08E-07 |
| ENSG00000118181 | RPS25      | -1.13E+00 | 5.80E-08 | 3.08E-07 |
| ENSG00000115541 | HSPE1      | -1.31E+00 | 5.84E-08 | 3.10E-07 |
| ENSG00000010165 | EEF1AKNMT  | -1.09E+00 | 5.85E-08 | 3.11E-07 |
| ENSG00000139154 | AEBP2      | -1.13E+00 | 5.93E-08 | 3.15E-07 |
| ENSG00000259807 | AC009093.1 | -2.94E+00 | 6.03E-08 | 3.20E-07 |
| ENSG00000198018 | ENTPD7     | -1.28E+00 | 6.11E-08 | 3.24E-07 |
| ENSG00000125630 | POLR1B     | -1.45E+00 | 6.22E-08 | 3.29E-07 |
| ENSG00000180611 | MB21D2     | -1.37E+00 | 6.37E-08 | 3.37E-07 |
| ENSG00000239672 | NME1       | -1.31E+00 | 6.92E-08 | 3.65E-07 |
| ENSG00000112319 | EYA4       | -1.38E+00 | 7.16E-08 | 3.76E-07 |
| ENSG00000133243 | BTBD2      | -1.07E+00 | 7.30E-08 | 3.84E-07 |
| ENSG00000139263 | LRIG3      | -1.48E+00 | 7.41E-08 | 3.89E-07 |
| ENSG00000130723 | PRRC2B     | -1.06E+00 | 7.49E-08 | 3.93E-07 |
| ENSG00000101160 | CTSZ       | -1.93E+00 | 7.74E-08 | 4.05E-07 |
| ENSG00000143341 | HMCN1      | -3.65E+00 | 8.26E-08 | 4.31E-07 |
| ENSG00000077097 | TOP2B      | -1.02E+00 | 8.39E-08 | 4.38E-07 |
| ENSG00000164587 | RPS14      | -1.18E+00 | 8.52E-08 | 4.44E-07 |

|                 |            |           |          |          |
|-----------------|------------|-----------|----------|----------|
| ENSG00000121210 | TMEM131L   | -1.48E+00 | 8.56E-08 | 4.46E-07 |
| ENSG00000222041 | CYTOR      | -1.47E+00 | 8.77E-08 | 4.56E-07 |
| ENSG00000139083 | ETV6       | -1.10E+00 | 8.89E-08 | 4.62E-07 |
| ENSG00000173918 | C1QTNF1    | -1.50E+00 | 8.91E-08 | 4.63E-07 |
| ENSG00000140263 | SORD       | -2.64E+00 | 9.37E-08 | 4.86E-07 |
| ENSG00000129925 | TMEM8A     | -1.08E+00 | 9.47E-08 | 4.90E-07 |
| ENSG00000149968 | MMP3       | -4.96E+00 | 9.92E-08 | 5.12E-07 |
| ENSG00000160131 | VMA21      | -1.07E+00 | 1.03E-07 | 5.28E-07 |
| ENSG00000244313 | AC024293.1 | -1.64E+00 | 1.04E-07 | 5.36E-07 |
| ENSG00000231940 | RPS7P3     | -1.62E+00 | 1.05E-07 | 5.40E-07 |
| ENSG00000148459 | PDSS1      | -1.83E+00 | 1.06E-07 | 5.47E-07 |
| ENSG00000250321 | AC079140.2 | -1.39E+00 | 1.08E-07 | 5.55E-07 |
| ENSG00000102271 | KLHL4      | -3.45E+00 | 1.12E-07 | 5.73E-07 |
| ENSG00000124508 | BTN2A2     | -1.82E+00 | 1.15E-07 | 5.91E-07 |
| ENSG00000131469 | RPL27      | -1.51E+00 | 1.16E-07 | 5.93E-07 |
| ENSG00000144061 | NPHP1      | -1.90E+00 | 1.18E-07 | 6.05E-07 |
| ENSG00000135686 | KLHL36     | -1.31E+00 | 1.22E-07 | 6.22E-07 |
| ENSG00000164211 | STARD4     | -1.41E+00 | 1.29E-07 | 6.55E-07 |
| ENSG00000166770 | ZNF667-AS1 | -1.72E+00 | 1.29E-07 | 6.55E-07 |
| ENSG00000133315 | MACROD1    | -1.79E+00 | 1.33E-07 | 6.73E-07 |
| ENSG00000124006 | OBSL1      | -1.40E+00 | 1.34E-07 | 6.78E-07 |
| ENSG00000163006 | CCDC138    | -1.36E+00 | 1.35E-07 | 6.83E-07 |
| ENSG00000205765 | C5orf51    | -1.28E+00 | 1.35E-07 | 6.85E-07 |
| ENSG00000182195 | LDOC1      | -1.25E+00 | 1.41E-07 | 7.12E-07 |
| ENSG00000167291 | TBC1D16    | -1.61E+00 | 1.43E-07 | 7.25E-07 |
| ENSG00000167695 | TLCD3A     | -1.41E+00 | 1.44E-07 | 7.27E-07 |
| ENSG00000148082 | SHC3       | -2.55E+00 | 1.44E-07 | 7.27E-07 |
| ENSG00000104324 | CPQ        | -2.61E+00 | 1.48E-07 | 7.45E-07 |
| ENSG00000139211 | AMIGO2     | -1.40E+00 | 1.54E-07 | 7.75E-07 |
| ENSG00000106868 | SUSD1      | -1.81E+00 | 1.56E-07 | 7.85E-07 |
| ENSG00000154917 | RAB6B      | -1.46E+00 | 1.57E-07 | 7.87E-07 |
| ENSG00000142541 | RPL13A     | -1.17E+00 | 1.58E-07 | 7.96E-07 |
| ENSG00000036549 | AC118549.1 | -1.10E+00 | 1.64E-07 | 8.23E-07 |
| ENSG00000185404 | SP140L     | -1.11E+00 | 1.65E-07 | 8.26E-07 |
| ENSG00000115970 | THADA      | -1.47E+00 | 1.68E-07 | 8.40E-07 |
| ENSG00000125821 | DTD1       | -1.19E+00 | 1.69E-07 | 8.44E-07 |
| ENSG00000154328 | NEIL2      | -2.45E+00 | 1.74E-07 | 8.68E-07 |
| ENSG00000106701 | FSD1L      | -2.19E+00 | 1.80E-07 | 8.96E-07 |
| ENSG00000089123 | TASP1      | -1.07E+00 | 1.80E-07 | 8.97E-07 |
| ENSG00000110911 | SLC11A2    | -1.29E+00 | 1.84E-07 | 9.14E-07 |
| ENSG00000165996 | HACD1      | -2.09E+00 | 1.86E-07 | 9.23E-07 |
| ENSG00000213516 | RBMXL1     | -1.15E+00 | 1.88E-07 | 9.34E-07 |
| ENSG00000139370 | SLC15A4    | -1.27E+00 | 2.05E-07 | 1.02E-06 |
| ENSG00000083845 | RPS5       | -1.15E+00 | 2.06E-07 | 1.02E-06 |
| ENSG00000067992 | PDK3       | -1.48E+00 | 2.09E-07 | 1.03E-06 |

|                 |            |           |          |          |
|-----------------|------------|-----------|----------|----------|
| ENSG00000137285 | TUBB2B     | -1.14E+00 | 2.10E-07 | 1.04E-06 |
| ENSG00000276107 | AC037198.1 | -2.58E+00 | 2.10E-07 | 1.04E-06 |
| ENSG00000165821 | SALL2      | -3.90E+00 | 2.14E-07 | 1.06E-06 |
| ENSG00000071051 | NCK2       | -1.15E+00 | 2.20E-07 | 1.08E-06 |
| ENSG00000173221 | GLRX       | -1.96E+00 | 2.20E-07 | 1.09E-06 |
| ENSG00000123545 | NDUFAF4    | -1.42E+00 | 2.24E-07 | 1.11E-06 |
| ENSG00000164164 | OTUD4      | -1.32E+00 | 2.48E-07 | 1.22E-06 |
| ENSG00000164251 | F2RL1      | -1.67E+00 | 2.54E-07 | 1.25E-06 |
| ENSG00000168398 | BDKRB2     | -1.21E+00 | 2.58E-07 | 1.27E-06 |
| ENSG00000156735 | BAG4       | -1.06E+00 | 2.62E-07 | 1.29E-06 |
| ENSG00000231500 | RPS18      | -1.19E+00 | 2.72E-07 | 1.33E-06 |
| ENSG00000175414 | ARL10      | -2.29E+00 | 2.73E-07 | 1.34E-06 |
| ENSG00000166261 | ZNF202     | -1.37E+00 | 2.88E-07 | 1.41E-06 |
| ENSG00000153551 | CMTM7      | -1.18E+00 | 2.88E-07 | 1.41E-06 |
| ENSG00000197958 | RPL12      | -1.19E+00 | 3.06E-07 | 1.49E-06 |
| ENSG00000187837 | HIST1H1C   | -1.17E+00 | 3.06E-07 | 1.49E-06 |
| ENSG00000167118 | URM1       | -1.27E+00 | 3.29E-07 | 1.60E-06 |
| ENSG00000137970 | RPL7P9     | -1.03E+00 | 3.34E-07 | 1.62E-06 |
| ENSG00000175970 | UNC119B    | -1.18E+00 | 3.47E-07 | 1.68E-06 |
| ENSG00000144320 | LNPB       | -1.16E+00 | 3.57E-07 | 1.72E-06 |
| ENSG00000206195 | DUXAP8     | -2.92E+00 | 3.62E-07 | 1.75E-06 |
| ENSG00000152147 | GEMIN6     | -1.22E+00 | 3.76E-07 | 1.81E-06 |
| ENSG00000100767 | PAPLN      | -2.10E+00 | 3.92E-07 | 1.89E-06 |
| ENSG00000118263 | KLF7       | -1.55E+00 | 3.99E-07 | 1.92E-06 |
| ENSG00000164182 | NDUFAF2    | -1.57E+00 | 4.24E-07 | 2.03E-06 |
| ENSG00000156853 | ZNF689     | -1.19E+00 | 4.31E-07 | 2.06E-06 |
| ENSG00000136425 | CIB2       | -1.31E+00 | 4.33E-07 | 2.07E-06 |
| ENSG00000165259 | HDX        | -2.80E+00 | 4.41E-07 | 2.11E-06 |
| ENSG00000120658 | ENOX1      | -2.27E+00 | 4.68E-07 | 2.23E-06 |
| ENSG00000111906 | HDDC2      | -1.00E+00 | 4.72E-07 | 2.25E-06 |
| ENSG00000080823 | MOK        | -1.50E+00 | 5.32E-07 | 2.52E-06 |
| ENSG00000162244 | RPL29      | -1.37E+00 | 5.50E-07 | 2.60E-06 |
| ENSG00000136273 | HUS1       | -1.55E+00 | 5.54E-07 | 2.62E-06 |
| ENSG00000154734 | ADAMTS1    | -1.50E+00 | 5.69E-07 | 2.69E-06 |
| ENSG00000120217 | CD274      | -2.54E+00 | 5.72E-07 | 2.70E-06 |
| ENSG00000128602 | SMO        | -1.27E+00 | 5.72E-07 | 2.70E-06 |
| ENSG00000119927 | GPAM       | -1.80E+00 | 5.75E-07 | 2.71E-06 |
| ENSG00000064199 | SPA17      | -1.37E+00 | 5.93E-07 | 2.79E-06 |
| ENSG00000103319 | EEF2K      | -1.19E+00 | 6.00E-07 | 2.82E-06 |
| ENSG00000172469 | MANEA      | -1.45E+00 | 6.14E-07 | 2.88E-06 |
| ENSG00000136247 | ZDHHC4     | -1.28E+00 | 6.16E-07 | 2.89E-06 |
| ENSG00000111186 | WNT5B      | -1.89E+00 | 6.22E-07 | 2.92E-06 |
| ENSG00000198837 | DENND4B    | -1.55E+00 | 6.24E-07 | 2.92E-06 |
| ENSG00000130810 | PPAN       | -1.34E+00 | 6.25E-07 | 2.93E-06 |
| ENSG00000181544 | FANCB      | -1.34E+00 | 6.31E-07 | 2.95E-06 |

|                 |            |           |          |          |
|-----------------|------------|-----------|----------|----------|
| ENSG00000158863 | FAM160B2   | -1.40E+00 | 6.42E-07 | 3.00E-06 |
| ENSG00000006530 | AGK        | -1.04E+00 | 6.50E-07 | 3.04E-06 |
| ENSG00000228594 | FNDC10     | -1.52E+00 | 6.67E-07 | 3.11E-06 |
| ENSG00000114942 | EEF1B2     | -1.03E+00 | 6.69E-07 | 3.12E-06 |
| ENSG00000124802 | EEF1E1     | -1.09E+00 | 6.72E-07 | 3.13E-06 |
| ENSG00000249992 | TMEM158    | -1.23E+00 | 7.19E-07 | 3.34E-06 |
| ENSG00000118503 | TNFAIP3    | -1.10E+00 | 7.23E-07 | 3.36E-06 |
| ENSG00000074181 | NOTCH3     | -1.53E+00 | 7.45E-07 | 3.45E-06 |
| ENSG00000148498 | PARD3      | -1.08E+00 | 7.52E-07 | 3.48E-06 |
| ENSG00000189046 | ALKBH2     | -1.18E+00 | 7.70E-07 | 3.56E-06 |
| ENSG00000244879 | GABPB1-AS1 | -1.32E+00 | 7.73E-07 | 3.57E-06 |
| ENSG00000145681 | HAPLN1     | -1.78E+00 | 7.81E-07 | 3.60E-06 |
| ENSG00000139289 | PHLDA1     | -1.58E+00 | 8.01E-07 | 3.69E-06 |
| ENSG00000196465 | MYL6B      | -1.13E+00 | 8.09E-07 | 3.72E-06 |
| ENSG00000235175 | RPL26P37   | -1.07E+00 | 8.10E-07 | 3.73E-06 |
| ENSG00000171889 | MIR31HG    | -2.26E+00 | 8.32E-07 | 3.82E-06 |
| ENSG00000203805 | PLPP4      | -3.19E+00 | 8.76E-07 | 4.01E-06 |
| ENSG00000232445 | AC006329.1 | -1.72E+00 | 9.10E-07 | 4.16E-06 |
| ENSG00000154237 | LRRK1      | -1.67E+00 | 1.01E-06 | 4.59E-06 |
| ENSG00000129480 | DTD2       | -1.42E+00 | 1.01E-06 | 4.62E-06 |
| ENSG00000085982 | USP40      | -4.35E+00 | 1.02E-06 | 4.65E-06 |
| ENSG00000234664 | HMG2P5     | -2.04E+00 | 1.06E-06 | 4.82E-06 |
| ENSG00000152484 | USP12      | -1.19E+00 | 1.09E-06 | 4.95E-06 |
| ENSG00000253414 | AC124067.2 | -2.46E+00 | 1.09E-06 | 4.96E-06 |
| ENSG00000006042 | TMEM98     | -1.12E+00 | 1.10E-06 | 4.97E-06 |
| ENSG00000072401 | UBE2D1     | -1.23E+00 | 1.12E-06 | 5.05E-06 |
| ENSG00000196456 | ZNF775     | -2.07E+00 | 1.16E-06 | 5.24E-06 |
| ENSG00000127920 | GNG11      | -2.33E+00 | 1.17E-06 | 5.30E-06 |
| ENSG00000164761 | TNFRSF11B  | -1.80E+00 | 1.20E-06 | 5.41E-06 |
| ENSG00000165730 | STOX1      | -2.21E+00 | 1.21E-06 | 5.46E-06 |
| ENSG00000113838 | TBCCD1     | -3.02E+00 | 1.25E-06 | 5.62E-06 |
| ENSG00000198131 | ZNF544     | -1.12E+00 | 1.31E-06 | 5.90E-06 |
| ENSG00000170946 | DNAJC24    | -1.19E+00 | 1.32E-06 | 5.92E-06 |
| ENSG00000186871 | ERCC6L     | -1.19E+00 | 1.34E-06 | 6.04E-06 |
| ENSG00000136319 | TTC5       | -1.19E+00 | 1.41E-06 | 6.31E-06 |
| ENSG00000181924 | COA4       | -1.29E+00 | 1.41E-06 | 6.32E-06 |
| ENSG00000038002 | AGA        | -1.43E+00 | 1.42E-06 | 6.36E-06 |
| ENSG00000164687 | FABP5      | -2.29E+00 | 1.45E-06 | 6.49E-06 |
| ENSG00000138286 | FAM149B1   | -4.03E+00 | 1.46E-06 | 6.51E-06 |
| ENSG00000176371 | ZSCAN2     | -2.28E+00 | 1.50E-06 | 6.68E-06 |
| ENSG00000140987 | ZSCAN32    | -1.00E+00 | 1.50E-06 | 6.68E-06 |
| ENSG00000143363 | PRUNE1     | -1.61E+00 | 1.56E-06 | 6.95E-06 |
| ENSG00000064042 | LIMCH1     | -1.08E+00 | 1.56E-06 | 6.96E-06 |
| ENSG00000122952 | ZWINT      | -1.09E+00 | 1.59E-06 | 7.07E-06 |
| ENSG00000281398 | SNHG4      | -2.51E+00 | 1.61E-06 | 7.15E-06 |

|                 |            |           |          |          |
|-----------------|------------|-----------|----------|----------|
| ENSG00000121481 | RNF2       | -1.47E+00 | 1.65E-06 | 7.30E-06 |
| ENSG00000073670 | ADAM11     | -1.58E+00 | 1.67E-06 | 7.37E-06 |
| ENSG00000136205 | TNS3       | -1.56E+00 | 1.73E-06 | 7.65E-06 |
| ENSG00000176720 | BOK        | -1.09E+00 | 1.78E-06 | 7.84E-06 |
| ENSG00000276345 | AC004556.3 | -1.70E+00 | 1.80E-06 | 7.91E-06 |
| ENSG00000132768 | DPH2       | -1.71E+00 | 1.92E-06 | 8.42E-06 |
| ENSG00000164338 | UTP15      | -1.01E+00 | 1.97E-06 | 8.66E-06 |
| ENSG00000198918 | RPL39      | -1.56E+00 | 2.00E-06 | 8.75E-06 |
| ENSG00000145375 | SPATA5     | -1.34E+00 | 2.05E-06 | 8.97E-06 |
| ENSG00000132205 | EMILIN2    | -1.25E+00 | 2.10E-06 | 9.20E-06 |
| ENSG00000122376 | SHLD2      | -1.34E+00 | 2.13E-06 | 9.30E-06 |
| ENSG00000152465 | NMT2       | -1.03E+00 | 2.17E-06 | 9.48E-06 |
| ENSG00000027847 | B4GALT7    | -1.11E+00 | 2.18E-06 | 9.53E-06 |
| ENSG00000118564 | FBXL5      | -1.06E+00 | 2.20E-06 | 9.58E-06 |
| ENSG00000263266 | RPS7P1     | -1.19E+00 | 2.28E-06 | 9.92E-06 |
| ENSG00000167637 | ZNF283     | -1.53E+00 | 2.38E-06 | 1.03E-05 |
| ENSG00000138382 | METTL5     | -1.04E+00 | 2.48E-06 | 1.08E-05 |
| ENSG00000147130 | ZMYM3      | -1.31E+00 | 2.49E-06 | 1.08E-05 |
| ENSG00000184602 | SNN        | -1.11E+00 | 2.51E-06 | 1.09E-05 |
| ENSG00000172123 | SLFN12     | -1.40E+00 | 2.52E-06 | 1.09E-05 |
| ENSG00000134259 | NGF        | -2.14E+00 | 2.54E-06 | 1.10E-05 |
| ENSG00000104213 | PDGFRL     | -3.63E+00 | 2.57E-06 | 1.11E-05 |
| ENSG00000229117 | RPL41      | -1.12E+00 | 2.71E-06 | 1.17E-05 |
| ENSG00000134668 | SPOCD1     | -1.85E+00 | 2.97E-06 | 1.27E-05 |
| ENSG00000146425 | DYNLT1     | -1.02E+00 | 3.04E-06 | 1.30E-05 |
| ENSG00000205060 | SLC35B4    | -1.26E+00 | 3.10E-06 | 1.33E-05 |
| ENSG00000055147 | FAM114A2   | -1.40E+00 | 3.17E-06 | 1.36E-05 |
| ENSG00000198858 | R3HDM4     | -1.53E+00 | 3.18E-06 | 1.36E-05 |
| ENSG00000229659 | RPL26P6    | -1.09E+00 | 3.21E-06 | 1.37E-05 |
| ENSG00000263001 | GTF2I      | -1.08E+00 | 3.29E-06 | 1.41E-05 |
| ENSG00000185201 | IFITM2     | -1.06E+00 | 3.30E-06 | 1.41E-05 |
| ENSG00000172379 | ARNT2      | -1.17E+00 | 3.31E-06 | 1.41E-05 |
| ENSG00000170293 | CMTM8      | -2.54E+00 | 3.32E-06 | 1.42E-05 |
| ENSG00000117069 | ST6GALNAC5 | -4.00E+00 | 3.35E-06 | 1.43E-05 |
| ENSG00000124614 | RPS10      | -1.34E+00 | 3.44E-06 | 1.47E-05 |
| ENSG00000049192 | ADAMTS6    | -1.09E+00 | 3.47E-06 | 1.48E-05 |
| ENSG00000197756 | RPL37A     | -1.08E+00 | 3.48E-06 | 1.48E-05 |
| ENSG00000257727 | CNPY2      | -1.05E+00 | 3.48E-06 | 1.48E-05 |
| ENSG00000164603 | BMT2       | -1.39E+00 | 3.56E-06 | 1.51E-05 |
| ENSG00000236609 | ZNF853     | -2.55E+00 | 3.60E-06 | 1.53E-05 |
| ENSG00000152253 | SPC25      | -1.21E+00 | 3.70E-06 | 1.57E-05 |
| ENSG00000232949 | AC002480.2 | -3.76E+00 | 3.70E-06 | 1.57E-05 |
| ENSG00000162595 | DIRAS3     | -2.94E+00 | 3.95E-06 | 1.67E-05 |
| ENSG00000240602 | AADACP1    | -2.00E+00 | 3.98E-06 | 1.68E-05 |
| ENSG00000152078 | TLCD4      | -2.65E+00 | 3.99E-06 | 1.68E-05 |

|                 |            |           |          |          |
|-----------------|------------|-----------|----------|----------|
| ENSG00000187049 | TMEM216    | -1.41E+00 | 4.04E-06 | 1.70E-05 |
| ENSG00000163545 | NUAK2      | -1.42E+00 | 4.07E-06 | 1.72E-05 |
| ENSG00000236453 | AC003092.1 | -2.49E+00 | 4.07E-06 | 1.72E-05 |
| ENSG00000149541 | B3GAT3     | -1.04E+00 | 4.21E-06 | 1.77E-05 |
| ENSG00000132563 | REEP2      | -1.69E+00 | 4.23E-06 | 1.78E-05 |
| ENSG00000146540 | C7orf50    | -1.03E+00 | 4.23E-06 | 1.78E-05 |
| ENSG00000241127 | YAE1       | -1.32E+00 | 4.24E-06 | 1.78E-05 |
| ENSG00000239559 | RPL37P2    | -1.38E+00 | 4.34E-06 | 1.82E-05 |
| ENSG00000163013 | FBXO41     | -2.99E+00 | 4.41E-06 | 1.85E-05 |
| ENSG00000148288 | GBGT1      | -3.70E+00 | 4.47E-06 | 1.87E-05 |
| ENSG00000188321 | ZNF559     | -1.71E+00 | 4.65E-06 | 1.94E-05 |
| ENSG00000262919 | CCNQ       | -1.26E+00 | 4.77E-06 | 1.99E-05 |
| ENSG00000162430 | SELENON    | -1.20E+00 | 4.87E-06 | 2.03E-05 |
| ENSG00000272269 | AL138724.1 | -1.71E+00 | 4.90E-06 | 2.04E-05 |
| ENSG00000162490 | DRAXIN     | -1.50E+00 | 4.94E-06 | 2.06E-05 |
| ENSG00000162650 | ATXN7L2    | -1.53E+00 | 5.00E-06 | 2.08E-05 |
| ENSG00000151388 | ADAMTS12   | -1.08E+00 | 5.10E-06 | 2.12E-05 |
| ENSG00000126088 | UROD       | -1.10E+00 | 5.17E-06 | 2.14E-05 |
| ENSG00000096654 | ZNF184     | -1.43E+00 | 5.38E-06 | 2.23E-05 |
| ENSG00000143801 | PSEN2      | -2.35E+00 | 5.56E-06 | 2.30E-05 |
| ENSG00000174236 | REP15      | -2.87E+00 | 5.64E-06 | 2.33E-05 |
| ENSG00000176155 | CCDC57     | -1.23E+00 | 5.70E-06 | 2.35E-05 |
| ENSG00000071082 | RPL31      | -1.05E+00 | 6.14E-06 | 2.53E-05 |
| ENSG00000163257 | DCAF16     | -1.13E+00 | 6.29E-06 | 2.59E-05 |
| ENSG00000164291 | ARSK       | -1.47E+00 | 6.55E-06 | 2.69E-05 |
| ENSG00000164849 | GPR146     | -2.62E+00 | 6.63E-06 | 2.72E-05 |
| ENSG00000188352 | FOCAD      | -1.50E+00 | 6.88E-06 | 2.82E-05 |
| ENSG00000213654 | GPSM3      | -3.30E+00 | 7.04E-06 | 2.88E-05 |
| ENSG00000247095 | MIR210HG   | -3.63E+00 | 7.09E-06 | 2.90E-05 |
| ENSG00000267041 | ZNF850     | -1.81E+00 | 7.10E-06 | 2.90E-05 |
| ENSG00000169084 | DHR SX     | -1.08E+00 | 7.42E-06 | 3.02E-05 |
| ENSG00000165060 | FXN        | -1.42E+00 | 7.59E-06 | 3.09E-05 |
| ENSG00000151917 | BEND6      | -2.16E+00 | 7.62E-06 | 3.10E-05 |
| ENSG00000218175 | AC016739.1 | -2.07E+00 | 7.64E-06 | 3.11E-05 |
| ENSG00000005100 | DHX33      | -1.03E+00 | 7.69E-06 | 3.13E-05 |
| ENSG00000212802 | RPL15P3    | -1.41E+00 | 7.69E-06 | 3.13E-05 |
| ENSG00000083807 | SLC27A5    | -2.43E+00 | 7.74E-06 | 3.15E-05 |
| ENSG00000184260 | HIST2H2AC  | -1.64E+00 | 7.83E-06 | 3.18E-05 |
| ENSG00000166228 | PCBD1      | -1.23E+00 | 7.92E-06 | 3.22E-05 |
| ENSG00000185630 | PBX1       | -1.26E+00 | 7.93E-06 | 3.22E-05 |
| ENSG00000244398 | AC116533.1 | -1.08E+00 | 8.07E-06 | 3.27E-05 |
| ENSG00000157214 | STEAP2     | -3.61E+00 | 8.47E-06 | 3.42E-05 |
| ENSG00000172716 | SLFN11     | -1.51E+00 | 8.55E-06 | 3.45E-05 |
| ENSG00000145592 | RPL37      | -1.33E+00 | 8.70E-06 | 3.51E-05 |
| ENSG00000182552 | RWDD4      | -1.05E+00 | 8.82E-06 | 3.56E-05 |

|                 |            |           |          |          |
|-----------------|------------|-----------|----------|----------|
| ENSG00000232677 | LINC00665  | -1.71E+00 | 8.99E-06 | 3.62E-05 |
| ENSG00000233532 | LINC00460  | -3.98E+00 | 9.09E-06 | 3.66E-05 |
| ENSG00000186416 | NKRF       | -1.04E+00 | 9.27E-06 | 3.72E-05 |
| ENSG00000153404 | PLEKHG4B   | -2.33E+00 | 9.28E-06 | 3.72E-05 |
| ENSG00000133740 | E2F5       | -2.68E+00 | 9.33E-06 | 3.74E-05 |
| ENSG00000182154 | MRPL41     | -1.55E+00 | 9.61E-06 | 3.85E-05 |
| ENSG00000198467 | TPM2       | -1.04E+00 | 9.70E-06 | 3.88E-05 |
| ENSG00000117152 | RGS4       | -1.75E+00 | 9.96E-06 | 3.98E-05 |
| ENSG00000164066 | INTU       | -1.34E+00 | 1.02E-05 | 4.09E-05 |
| ENSG00000018699 | TTC27      | -1.12E+00 | 1.08E-05 | 4.30E-05 |
| ENSG00000104518 | GSDMD      | -1.00E+00 | 1.09E-05 | 4.34E-05 |
| ENSG00000218426 | AL590867.2 | -1.50E+00 | 1.11E-05 | 4.43E-05 |
| ENSG00000125459 | MSTO1      | -3.49E+00 | 1.13E-05 | 4.51E-05 |
| ENSG00000106683 | LIMK1      | -1.17E+00 | 1.15E-05 | 4.58E-05 |
| ENSG00000139637 | C12orf10   | -1.12E+00 | 1.16E-05 | 4.59E-05 |
| ENSG00000100626 | GALNT16    | -1.92E+00 | 1.21E-05 | 4.77E-05 |
| ENSG00000198121 | LPAR1      | -1.37E+00 | 1.24E-05 | 4.89E-05 |
| ENSG00000008394 | MGST1      | -1.09E+00 | 1.24E-05 | 4.91E-05 |
| ENSG00000215417 | MIR17HG    | -3.42E+00 | 1.26E-05 | 4.96E-05 |
| ENSG00000167272 | POP5       | -1.26E+00 | 1.28E-05 | 5.04E-05 |
| ENSG00000125246 | CLYBL      | -4.36E+00 | 1.28E-05 | 5.04E-05 |
| ENSG00000226396 | AL031727.1 | -1.02E+00 | 1.28E-05 | 5.04E-05 |
| ENSG00000143545 | RAB13      | -1.04E+00 | 1.31E-05 | 5.15E-05 |
| ENSG00000165490 | DDIAS      | -1.12E+00 | 1.31E-05 | 5.15E-05 |
| ENSG00000163453 | IGFBP7     | -1.64E+00 | 1.34E-05 | 5.27E-05 |
| ENSG00000089775 | ZBTB25     | -1.33E+00 | 1.43E-05 | 5.57E-05 |
| ENSG00000154511 | DIPK1A     | -1.33E+00 | 1.54E-05 | 5.97E-05 |
| ENSG00000143498 | TAF1A      | -1.12E+00 | 1.54E-05 | 5.99E-05 |
| ENSG00000213315 | AL122020.1 | -1.31E+00 | 1.56E-05 | 6.05E-05 |
| ENSG00000196284 | SUPT3H     | -1.74E+00 | 1.59E-05 | 6.17E-05 |
| ENSG00000174748 | RPL15      | -1.05E+00 | 1.59E-05 | 6.18E-05 |
| ENSG00000183828 | NUDT14     | -1.95E+00 | 1.62E-05 | 6.28E-05 |
| ENSG00000102743 | SLC25A15   | -1.63E+00 | 1.67E-05 | 6.45E-05 |
| ENSG00000184785 | SMIM10     | -3.22E+00 | 1.68E-05 | 6.48E-05 |
| ENSG00000112159 | MDN1       | -1.18E+00 | 1.69E-05 | 6.54E-05 |
| ENSG00000168758 | SEMA4C     | -1.15E+00 | 1.74E-05 | 6.70E-05 |
| ENSG00000140600 | SH3GL3     | -3.14E+00 | 1.74E-05 | 6.72E-05 |
| ENSG00000233117 | LINC00702  | -2.87E+00 | 1.74E-05 | 6.72E-05 |
| ENSG00000188130 | MAPK12     | -1.36E+00 | 1.77E-05 | 6.82E-05 |
| ENSG00000038295 | TLL1       | -2.65E+00 | 1.78E-05 | 6.83E-05 |
| ENSG00000142534 | RPS11      | -1.25E+00 | 1.84E-05 | 7.08E-05 |
| ENSG00000117153 | KLHL12     | -1.13E+00 | 1.85E-05 | 7.11E-05 |
| ENSG00000278619 | MRM1       | -1.23E+00 | 1.87E-05 | 7.17E-05 |
| ENSG00000249867 | LINC02742  | -4.79E+00 | 1.92E-05 | 7.37E-05 |
| ENSG00000171051 | FPR1       | -4.66E+00 | 1.93E-05 | 7.38E-05 |

|                 |            |           |          |          |
|-----------------|------------|-----------|----------|----------|
| ENSG00000228929 | RPS13P2    | -1.43E+00 | 1.94E-05 | 7.44E-05 |
| ENSG00000184384 | MAML2      | -2.36E+00 | 1.95E-05 | 7.47E-05 |
| ENSG00000165617 | DACT1      | -1.64E+00 | 1.96E-05 | 7.48E-05 |
| ENSG00000271590 | AC108463.3 | -2.11E+00 | 1.96E-05 | 7.49E-05 |
| ENSG00000124813 | RUNX2      | -1.28E+00 | 1.97E-05 | 7.54E-05 |
| ENSG00000182774 | RPS17      | -1.90E+00 | 1.98E-05 | 7.56E-05 |
| ENSG00000181192 | DHTKD1     | -1.14E+00 | 1.99E-05 | 7.59E-05 |
| ENSG00000089091 | DZANK1     | -1.15E+00 | 2.00E-05 | 7.62E-05 |
| ENSG00000197056 | ZMYM1      | -1.63E+00 | 2.04E-05 | 7.78E-05 |
| ENSG00000105866 | SP4        | -1.05E+00 | 2.07E-05 | 7.86E-05 |
| ENSG00000137033 | IL33       | -4.67E+00 | 2.09E-05 | 7.95E-05 |
| ENSG00000277462 | ZNF670     | -1.67E+00 | 2.10E-05 | 7.98E-05 |
| ENSG00000196611 | MMP1       | -3.82E+00 | 2.12E-05 | 8.06E-05 |
| ENSG00000079150 | FKBP7      | -2.23E+00 | 2.17E-05 | 8.24E-05 |
| ENSG00000183605 | SFXN4      | -1.47E+00 | 2.21E-05 | 8.36E-05 |
| ENSG00000133704 | IPO8       | -1.16E+00 | 2.21E-05 | 8.38E-05 |
| ENSG00000163584 | RPL22L1    | -1.55E+00 | 2.21E-05 | 8.38E-05 |
| ENSG00000126243 | LRFN3      | -2.80E+00 | 2.22E-05 | 8.39E-05 |
| ENSG00000153823 | PID1       | -1.59E+00 | 2.29E-05 | 8.65E-05 |
| ENSG00000160993 | ALKBH4     | -1.29E+00 | 2.32E-05 | 8.74E-05 |
| ENSG00000236552 | RPL13AP5   | -1.59E+00 | 2.34E-05 | 8.82E-05 |
| ENSG00000189007 | ADAT2      | -1.86E+00 | 2.42E-05 | 9.10E-05 |
| ENSG00000172534 | HCFC1      | -1.00E+00 | 2.43E-05 | 9.14E-05 |
| ENSG00000148680 | HTR7       | -2.00E+00 | 2.47E-05 | 9.29E-05 |
| ENSG00000110925 | CSRNP2     | -1.07E+00 | 2.49E-05 | 9.34E-05 |
| ENSG00000174547 | MRPL11     | -1.12E+00 | 2.49E-05 | 9.35E-05 |
| ENSG00000138018 | SELENOI    | -1.02E+00 | 2.55E-05 | 9.55E-05 |
| ENSG00000183665 | TRMT12     | -1.01E+00 | 2.61E-05 | 9.77E-05 |
| ENSG00000149289 | ZC3H12C    | -1.17E+00 | 2.65E-05 | 9.93E-05 |
| ENSG00000143469 | SYT14      | -1.07E+00 | 2.68E-05 | 1.00E-04 |
| ENSG00000077713 | SLC25A43   | -2.28E+00 | 2.69E-05 | 1.00E-04 |
| ENSG00000244026 | FAM86DP    | -1.34E+00 | 2.71E-05 | 1.01E-04 |
| ENSG00000196683 | TOMM7      | -1.11E+00 | 2.75E-05 | 1.03E-04 |
| ENSG00000102359 | SRPX2      | -2.21E+00 | 2.79E-05 | 1.04E-04 |
| ENSG00000157870 | PRXL2B     | -1.27E+00 | 2.82E-05 | 1.05E-04 |
| ENSG00000138085 | ATRAID     | -1.15E+00 | 2.90E-05 | 1.08E-04 |
| ENSG00000106785 | TRIM14     | -1.02E+00 | 2.93E-05 | 1.09E-04 |
| ENSG00000100216 | TOMM22     | -1.03E+00 | 2.94E-05 | 1.09E-04 |
| ENSG00000137726 | FXYD6      | -1.79E+00 | 2.94E-05 | 1.09E-04 |
| ENSG00000132429 | POPDC3     | -1.14E+00 | 2.95E-05 | 1.09E-04 |
| ENSG00000167994 | RAB3IL1    | -1.74E+00 | 2.98E-05 | 1.11E-04 |
| ENSG00000185730 | ZNF696     | -1.72E+00 | 3.00E-05 | 1.11E-04 |
| ENSG00000242299 | AC073861.1 | -1.05E+00 | 3.00E-05 | 1.11E-04 |
| ENSG00000174606 | ANGEL2     | -1.35E+00 | 3.04E-05 | 1.13E-04 |
| ENSG00000102178 | UBL4A      | -1.04E+00 | 3.06E-05 | 1.13E-04 |



|                 |            |           |          |          |
|-----------------|------------|-----------|----------|----------|
| ENSG00000226674 | TEX41      | -4.16E+00 | 3.07E-05 | 1.14E-04 |
| ENSG00000143891 | GALM       | -1.27E+00 | 3.07E-05 | 1.14E-04 |
| ENSG00000186625 | KATNA1     | -1.23E+00 | 3.20E-05 | 1.18E-04 |
| ENSG00000127124 | HIVEP3     | -1.16E+00 | 3.22E-05 | 1.18E-04 |
| ENSG00000172889 | EGFL7      | -1.12E+00 | 3.23E-05 | 1.19E-04 |
| ENSG00000113966 | ARL6       | -1.28E+00 | 3.28E-05 | 1.21E-04 |
| ENSG00000118894 | EEF2KMT    | -1.50E+00 | 3.37E-05 | 1.24E-04 |
| ENSG00000165288 | BRWD3      | -1.23E+00 | 3.38E-05 | 1.24E-04 |
| ENSG00000186020 | ZNF529     | -1.48E+00 | 3.41E-05 | 1.25E-04 |
| ENSG00000124279 | FASTKD3    | -1.27E+00 | 3.43E-05 | 1.26E-04 |
| ENSG00000067445 | TRO        | -2.49E+00 | 3.49E-05 | 1.28E-04 |
| ENSG00000163482 | STK36      | -1.05E+00 | 3.49E-05 | 1.28E-04 |
| ENSG00000023171 | GRAMD1B    | -1.88E+00 | 3.52E-05 | 1.29E-04 |
| ENSG00000121964 | GTDC1      | -1.46E+00 | 3.54E-05 | 1.29E-04 |
| ENSG00000204301 | NOTCH4     | -2.39E+00 | 3.56E-05 | 1.30E-04 |
| ENSG00000081019 | RSBN1      | -1.01E+00 | 3.74E-05 | 1.36E-04 |
| ENSG00000265808 | SEC22B     | -1.20E+00 | 3.74E-05 | 1.36E-04 |
| ENSG00000165169 | DYNLT3     | -1.11E+00 | 3.75E-05 | 1.37E-04 |
| ENSG00000118507 | AKAP7      | -1.68E+00 | 3.82E-05 | 1.39E-04 |
| ENSG00000145912 | NHP2       | -1.20E+00 | 3.85E-05 | 1.40E-04 |
| ENSG00000144713 | RPL32      | -1.45E+00 | 3.89E-05 | 1.41E-04 |
| ENSG00000196368 | NUDT11     | -1.78E+00 | 3.95E-05 | 1.43E-04 |
| ENSG00000137218 | FRS3       | -3.60E+00 | 3.98E-05 | 1.45E-04 |
| ENSG00000235559 | NOP56P1    | -1.22E+00 | 4.05E-05 | 1.47E-04 |
| ENSG00000151474 | FRMD4A     | -1.03E+00 | 4.16E-05 | 1.51E-04 |
| ENSG00000163682 | RPL9       | -1.03E+00 | 4.21E-05 | 1.52E-04 |
| ENSG00000138002 | IFT172     | -2.30E+00 | 4.30E-05 | 1.55E-04 |
| ENSG00000214026 | MRPL23     | -1.31E+00 | 4.43E-05 | 1.60E-04 |
| ENSG00000244306 | DUXAP10    | -3.49E+00 | 4.77E-05 | 1.71E-04 |
| ENSG00000134461 | ANKRD16    | -2.02E+00 | 4.78E-05 | 1.72E-04 |
| ENSG00000184117 | NIPSNAP1   | -1.23E+00 | 4.79E-05 | 1.72E-04 |
| ENSG00000164953 | TMEM67     | -1.05E+00 | 4.90E-05 | 1.76E-04 |
| ENSG00000146267 | FAXC       | -1.80E+00 | 4.91E-05 | 1.76E-04 |
| ENSG00000145703 | IQGAP2     | -4.00E+00 | 5.19E-05 | 1.85E-04 |
| ENSG00000184005 | ST6GALNAC3 | -2.80E+00 | 5.37E-05 | 1.91E-04 |
| ENSG00000136732 | GYPC       | -1.57E+00 | 5.38E-05 | 1.91E-04 |
| ENSG00000276368 | HIST1H2AJ  | -3.09E+00 | 5.46E-05 | 1.94E-04 |
| ENSG00000104290 | FZD3       | -1.05E+00 | 5.49E-05 | 1.95E-04 |
| ENSG00000146858 | ZC3HAV1L   | -3.51E+00 | 5.76E-05 | 2.04E-04 |
| ENSG00000186352 | ANKRD37    | -1.55E+00 | 6.03E-05 | 2.13E-04 |
| ENSG00000065802 | ASB1       | -1.01E+00 | 6.04E-05 | 2.13E-04 |
| ENSG00000197208 | SLC22A4    | -1.17E+00 | 6.06E-05 | 2.14E-04 |
| ENSG00000149150 | SLC43A1    | -1.72E+00 | 6.19E-05 | 2.18E-04 |
| ENSG00000257698 | GIHCG      | -1.38E+00 | 6.37E-05 | 2.24E-04 |
| ENSG00000110536 | PTPMT1     | -1.75E+00 | 6.43E-05 | 2.26E-04 |

|                 |            |           |          |          |
|-----------------|------------|-----------|----------|----------|
| ENSG00000213280 | AC090114.1 | -1.30E+00 | 6.49E-05 | 2.28E-04 |
| ENSG00000119408 | NEK6       | -1.28E+00 | 6.55E-05 | 2.30E-04 |
| ENSG00000173281 | PPP1R3B    | -2.20E+00 | 6.65E-05 | 2.33E-04 |
| ENSG00000166886 | NAB2       | -1.09E+00 | 6.82E-05 | 2.38E-04 |
| ENSG00000148297 | MED22      | -1.08E+00 | 6.92E-05 | 2.42E-04 |
| ENSG00000172954 | LCLAT1     | -1.14E+00 | 7.01E-05 | 2.45E-04 |
| ENSG00000166920 | C15orf48   | -3.34E+00 | 7.09E-05 | 2.47E-04 |
| ENSG00000223485 | LINC01615  | -1.96E+00 | 7.31E-05 | 2.55E-04 |
| ENSG00000214293 | APTR       | -1.25E+00 | 7.40E-05 | 2.58E-04 |
| ENSG00000226928 | RPS14P4    | -1.86E+00 | 7.73E-05 | 2.68E-04 |
| ENSG00000275464 | FP565260.1 | -1.61E+00 | 8.07E-05 | 2.79E-04 |
| ENSG00000266709 | AC005224.3 | -1.92E+00 | 8.15E-05 | 2.82E-04 |
| ENSG00000227372 | TP73-AS1   | -1.34E+00 | 8.29E-05 | 2.87E-04 |
| ENSG00000225439 | BOLA3-AS1  | -1.98E+00 | 8.47E-05 | 2.92E-04 |
| ENSG00000101132 | PFDN4      | -1.28E+00 | 8.77E-05 | 3.02E-04 |
| ENSG00000164758 | MED30      | -1.09E+00 | 8.79E-05 | 3.03E-04 |
| ENSG00000186469 | GNG2       | -2.37E+00 | 9.25E-05 | 3.18E-04 |
| ENSG00000153814 | JAZF1      | -1.39E+00 | 9.41E-05 | 3.23E-04 |
| ENSG00000141391 | PRELID3A   | -2.16E+00 | 9.57E-05 | 3.28E-04 |
| ENSG00000141258 | SGSM2      | -1.18E+00 | 9.62E-05 | 3.29E-04 |
| ENSG00000169855 | ROBO1      | -1.49E+00 | 9.96E-05 | 3.40E-04 |
| ENSG00000105889 | STEAP1B    | -3.46E+00 | 1.02E-04 | 3.49E-04 |
| ENSG00000144355 | DLX1       | -1.13E+00 | 1.03E-04 | 3.51E-04 |
| ENSG00000132953 | XPO4       | -1.16E+00 | 1.03E-04 | 3.51E-04 |
| ENSG00000132330 | SCLY       | -1.74E+00 | 1.05E-04 | 3.57E-04 |
| ENSG00000100116 | GCAT       | -1.12E+00 | 1.07E-04 | 3.62E-04 |
| ENSG00000042088 | TDP1       | -1.14E+00 | 1.08E-04 | 3.67E-04 |
| ENSG00000197020 | ZNF100     | -1.00E+00 | 1.09E-04 | 3.71E-04 |
| ENSG00000166441 | RPL27A     | -1.06E+00 | 1.10E-04 | 3.74E-04 |
| ENSG00000204291 | COL15A1    | -1.48E+00 | 1.13E-04 | 3.82E-04 |
| ENSG00000169067 | ACTBL2     | -1.65E+00 | 1.21E-04 | 4.07E-04 |
| ENSG00000174705 | SH3PXD2B   | -1.36E+00 | 1.22E-04 | 4.10E-04 |
| ENSG00000162998 | FRZB       | -1.68E+00 | 1.23E-04 | 4.14E-04 |
| ENSG00000198298 | ZNF485     | -2.89E+00 | 1.23E-04 | 4.14E-04 |
| ENSG00000197951 | ZNF71      | -1.26E+00 | 1.24E-04 | 4.17E-04 |
| ENSG00000137463 | MGARP      | -1.60E+00 | 1.28E-04 | 4.30E-04 |
| ENSG00000149483 | TMEM138    | -1.05E+00 | 1.29E-04 | 4.32E-04 |
| ENSG00000205213 | LGR4       | -2.15E+00 | 1.29E-04 | 4.34E-04 |
| ENSG00000090971 | NAT14      | -1.00E+00 | 1.32E-04 | 4.42E-04 |
| ENSG00000198931 | APRT       | -1.39E+00 | 1.34E-04 | 4.47E-04 |
| ENSG00000108700 | CCL8       | -3.96E+00 | 1.36E-04 | 4.54E-04 |
| ENSG00000198894 | CIPC       | -1.07E+00 | 1.45E-04 | 4.83E-04 |
| ENSG00000119705 | SLIRP      | -1.23E+00 | 1.46E-04 | 4.86E-04 |
| ENSG00000244165 | P2RY11     | -1.02E+00 | 1.49E-04 | 4.96E-04 |
| ENSG00000181751 | C5orf30    | -1.49E+00 | 1.49E-04 | 4.96E-04 |

|                 |             |           |          |          |
|-----------------|-------------|-----------|----------|----------|
| ENSG00000120129 | DUSP1       | -1.11E+00 | 1.51E-04 | 5.00E-04 |
| ENSG00000147862 | NFIB        | -1.03E+00 | 1.52E-04 | 5.03E-04 |
| ENSG00000166831 | RBPMS2      | -1.12E+00 | 1.53E-04 | 5.07E-04 |
| ENSG00000240771 | ARHGEF25    | -1.75E+00 | 1.53E-04 | 5.07E-04 |
| ENSG00000006015 | REX1BD      | -1.24E+00 | 1.55E-04 | 5.13E-04 |
| ENSG00000173272 | MZT2A       | -1.14E+00 | 1.56E-04 | 5.15E-04 |
| ENSG00000240445 | FOXO3B      | -1.52E+00 | 1.58E-04 | 5.22E-04 |
| ENSG00000226419 | SLC16A1-AS1 | -1.15E+00 | 1.59E-04 | 5.24E-04 |
| ENSG00000186666 | BCDIN3D     | -1.57E+00 | 1.59E-04 | 5.25E-04 |
| ENSG00000147138 | GPR174      | -1.91E+01 | 1.61E-04 | 5.32E-04 |
| ENSG00000101670 | LIPG        | -2.98E+00 | 1.65E-04 | 5.44E-04 |
| ENSG00000253958 | CLDN23      | -2.47E+00 | 1.68E-04 | 5.51E-04 |
| ENSG00000163738 | MTHFD2L     | -1.06E+00 | 1.70E-04 | 5.56E-04 |
| ENSG00000170049 | KCNAB3      | -2.01E+00 | 1.74E-04 | 5.70E-04 |
| ENSG00000175054 | ATR         | -1.20E+00 | 1.78E-04 | 5.82E-04 |
| ENSG00000116791 | CRYZ        | -1.25E+00 | 1.79E-04 | 5.84E-04 |
| ENSG00000225159 | NPM1P39     | -2.26E+00 | 1.86E-04 | 6.07E-04 |
| ENSG00000198455 | ZXDB        | -1.69E+00 | 2.08E-04 | 6.74E-04 |
| ENSG00000163170 | BOLA3       | -1.10E+00 | 2.12E-04 | 6.86E-04 |
| ENSG00000272841 | AL139393.3  | -1.01E+00 | 2.14E-04 | 6.91E-04 |
| ENSG00000260862 | AC099506.1  | -3.65E+00 | 2.17E-04 | 6.99E-04 |
| ENSG00000182463 | TSHZ2       | -2.82E+00 | 2.20E-04 | 7.07E-04 |
| ENSG00000197358 | BNIP3P1     | -2.57E+00 | 2.20E-04 | 7.10E-04 |
| ENSG00000115919 | KYNU        | -1.96E+00 | 2.31E-04 | 7.42E-04 |
| ENSG00000079335 | CDC14A      | -1.81E+00 | 2.41E-04 | 7.71E-04 |
| ENSG00000143494 | VASH2       | -1.89E+00 | 2.41E-04 | 7.71E-04 |
| ENSG00000198874 | TYW1        | -1.05E+00 | 2.53E-04 | 8.07E-04 |
| ENSG00000163050 | COQ8A       | -1.01E+00 | 2.60E-04 | 8.29E-04 |
| ENSG00000145414 | NAF1        | -1.06E+00 | 2.61E-04 | 8.30E-04 |
| ENSG00000136840 | ST6GALNAC4  | -1.30E+00 | 2.63E-04 | 8.39E-04 |
| ENSG00000251602 | AL928654.1  | -2.38E+00 | 2.65E-04 | 8.45E-04 |
| ENSG00000169621 | APLF        | -1.64E+00 | 2.85E-04 | 9.02E-04 |
| ENSG00000167987 | VPS37C      | -1.03E+00 | 2.87E-04 | 9.08E-04 |
| ENSG00000138613 | APH1B       | -1.68E+00 | 2.89E-04 | 9.15E-04 |
| ENSG00000158402 | CDC25C      | -1.05E+00 | 2.89E-04 | 9.16E-04 |
| ENSG00000156482 | RPL30       | -1.08E+00 | 3.06E-04 | 9.65E-04 |
| ENSG00000175768 | TOMM5       | -1.40E+00 | 3.10E-04 | 9.74E-04 |
| ENSG00000148803 | FUOM        | -1.79E+00 | 3.13E-04 | 9.84E-04 |
| ENSG00000128011 | LRFN1       | -2.61E+00 | 3.13E-04 | 9.84E-04 |
| ENSG00000279739 | AC011369.2  | -4.01E+00 | 3.23E-04 | 1.01E-03 |
| ENSG00000167397 | VKORC1      | -1.16E+00 | 3.25E-04 | 1.02E-03 |
| ENSG00000119574 | ZBTB45      | -1.02E+00 | 3.26E-04 | 1.02E-03 |
| ENSG00000241852 | C8orf58     | -1.24E+00 | 3.28E-04 | 1.03E-03 |
| ENSG00000127995 | CASD1       | -1.19E+00 | 3.42E-04 | 1.07E-03 |
| ENSG00000108984 | MAP2K6      | -3.57E+00 | 3.42E-04 | 1.07E-03 |

|                 |            |           |          |          |
|-----------------|------------|-----------|----------|----------|
| ENSG00000131778 | CHD1L      | -3.74E+00 | 3.45E-04 | 1.08E-03 |
| ENSG00000143977 | SNRPG      | -1.25E+00 | 3.48E-04 | 1.08E-03 |
| ENSG00000087903 | RFX2       | -1.38E+00 | 3.54E-04 | 1.10E-03 |
| ENSG00000173077 | DEC1       | -2.25E+00 | 3.57E-04 | 1.11E-03 |
| ENSG00000160584 | SIK3       | -1.10E+00 | 3.62E-04 | 1.13E-03 |
| ENSG00000185483 | ROR1       | -1.26E+00 | 3.63E-04 | 1.13E-03 |
| ENSG00000133106 | EPST11     | -1.45E+00 | 3.63E-04 | 1.13E-03 |
| ENSG00000163637 | PRICKLE2   | -1.50E+00 | 3.66E-04 | 1.14E-03 |
| ENSG00000133640 | LRRIQ1     | -1.83E+00 | 3.76E-04 | 1.17E-03 |
| ENSG00000088881 | EBF4       | -2.15E+00 | 3.81E-04 | 1.18E-03 |
| ENSG00000107562 | CXCL12     | -2.09E+00 | 3.84E-04 | 1.19E-03 |
| ENSG00000259953 | AL138756.1 | -1.98E+00 | 3.95E-04 | 1.22E-03 |
| ENSG00000188677 | PARVB      | -1.10E+00 | 3.97E-04 | 1.23E-03 |
| ENSG00000136149 | RPL13AP25  | -1.07E+00 | 4.04E-04 | 1.24E-03 |
| ENSG00000180044 | C3orf80    | -1.85E+00 | 4.04E-04 | 1.25E-03 |
| ENSG00000197728 | RPS26      | -1.05E+00 | 4.06E-04 | 1.25E-03 |
| ENSG00000149948 | HMGA2      | -1.26E+00 | 4.07E-04 | 1.25E-03 |
| ENSG00000110395 | CBL        | -1.11E+00 | 4.13E-04 | 1.27E-03 |
| ENSG00000185432 | METTL7A    | -3.40E+00 | 4.15E-04 | 1.28E-03 |
| ENSG00000074935 | TUBE1      | -1.20E+00 | 4.17E-04 | 1.28E-03 |
| ENSG00000143224 | PPOX       | -1.09E+00 | 4.20E-04 | 1.29E-03 |
| ENSG00000136783 | NIPSNAP3A  | -1.12E+00 | 4.27E-04 | 1.31E-03 |
| ENSG00000112357 | PEX7       | -1.11E+00 | 4.32E-04 | 1.32E-03 |
| ENSG00000171451 | DSEL       | -1.14E+00 | 4.39E-04 | 1.34E-03 |
| ENSG00000135953 | MFSD9      | -1.18E+00 | 4.56E-04 | 1.39E-03 |
| ENSG00000261732 | AL031708.1 | -3.04E+00 | 4.58E-04 | 1.40E-03 |
| ENSG00000279483 | AC090498.1 | -1.76E+00 | 4.64E-04 | 1.42E-03 |
| ENSG00000107882 | SUFU       | -1.24E+00 | 4.76E-04 | 1.45E-03 |
| ENSG00000243667 | WDR92      | -1.45E+00 | 4.76E-04 | 1.45E-03 |
| ENSG00000162722 | TRIM58     | -1.16E+00 | 4.79E-04 | 1.46E-03 |
| ENSG00000119699 | TGFB3      | -1.04E+00 | 4.89E-04 | 1.48E-03 |
| ENSG00000139998 | RAB15      | -1.33E+00 | 4.90E-04 | 1.49E-03 |
| ENSG00000230615 | AL139220.2 | -2.41E+00 | 4.94E-04 | 1.50E-03 |
| ENSG00000083535 | PIBF1      | -1.17E+00 | 5.00E-04 | 1.51E-03 |
| ENSG00000180822 | PSMG4      | -1.31E+00 | 5.11E-04 | 1.54E-03 |
| ENSG00000184178 | SCFD2      | -1.65E+00 | 5.11E-04 | 1.54E-03 |
| ENSG00000088727 | KIF9       | -1.12E+00 | 5.16E-04 | 1.56E-03 |
| ENSG00000213741 | RPS29      | -1.43E+00 | 5.32E-04 | 1.60E-03 |
| ENSG00000188060 | RAB42      | -3.20E+00 | 5.41E-04 | 1.62E-03 |
| ENSG00000137818 | RPLP1      | -1.37E+00 | 5.44E-04 | 1.63E-03 |
| ENSG00000175711 | B3GNTL1    | -1.84E+00 | 5.45E-04 | 1.64E-03 |
| ENSG00000185305 | ARL15      | -1.26E+00 | 5.59E-04 | 1.68E-03 |
| ENSG00000100344 | PNPLA3     | -2.39E+00 | 5.70E-04 | 1.70E-03 |
| ENSG00000241399 | CD302      | -1.77E+00 | 5.96E-04 | 1.78E-03 |
| ENSG00000175395 | ZNF25      | -2.37E+00 | 6.00E-04 | 1.79E-03 |

|                 |            |           |          |          |
|-----------------|------------|-----------|----------|----------|
| ENSG00000169087 | HSPBAP1    | -1.11E+00 | 6.22E-04 | 1.85E-03 |
| ENSG00000019549 | SNAI2      | -1.11E+00 | 6.25E-04 | 1.86E-03 |
| ENSG00000213347 | MXD3       | -1.05E+00 | 6.28E-04 | 1.86E-03 |
| ENSG00000047230 | CTPS2      | -1.06E+00 | 6.31E-04 | 1.87E-03 |
| ENSG00000181666 | ZNF875     | -1.02E+00 | 6.53E-04 | 1.93E-03 |
| ENSG00000179776 | CDH5       | -3.49E+00 | 6.62E-04 | 1.96E-03 |
| ENSG00000185760 | KCNQ5      | -1.78E+00 | 6.81E-04 | 2.01E-03 |
| ENSG00000186314 | PRELID2    | -1.26E+00 | 6.82E-04 | 2.01E-03 |
| ENSG00000137944 | KYAT3      | -1.19E+00 | 6.89E-04 | 2.03E-03 |
| ENSG00000125965 | GDF5       | -2.37E+00 | 7.03E-04 | 2.07E-03 |
| ENSG00000186063 | AIDA       | -1.22E+00 | 7.16E-04 | 2.10E-03 |
| ENSG00000242498 | ARPIN      | -2.01E+00 | 7.25E-04 | 2.13E-03 |
| ENSG00000227992 | AC108463.1 | -2.06E+00 | 7.31E-04 | 2.14E-03 |
| ENSG00000183474 | GTF2H2C    | -2.06E+00 | 7.44E-04 | 2.18E-03 |
| ENSG00000168890 | TMEM150A   | -1.98E+00 | 7.47E-04 | 2.18E-03 |
| ENSG00000234692 | AL355601.1 | -3.79E+00 | 7.60E-04 | 2.22E-03 |
| ENSG00000151468 | CCDC3      | -1.40E+00 | 8.01E-04 | 2.33E-03 |
| ENSG00000132749 | TESMIN     | -3.47E+00 | 8.07E-04 | 2.34E-03 |
| ENSG00000227906 | SNAP25-AS1 | -4.00E+00 | 8.18E-04 | 2.37E-03 |
| ENSG00000140379 | BCL2A1     | -3.42E+00 | 8.27E-04 | 2.40E-03 |
| ENSG00000204131 | NHSL2      | -1.68E+00 | 8.38E-04 | 2.43E-03 |
| ENSG00000213058 | AL365357.1 | -1.01E+00 | 8.45E-04 | 2.44E-03 |
| ENSG00000198189 | HSD17B11   | -1.16E+00 | 8.46E-04 | 2.45E-03 |
| ENSG00000279369 | AC046185.3 | -2.11E+00 | 8.52E-04 | 2.46E-03 |
| ENSG00000164220 | F2RL2      | -2.48E+00 | 8.53E-04 | 2.46E-03 |
| ENSG00000169193 | CCDC126    | -1.54E+00 | 8.57E-04 | 2.47E-03 |
| ENSG00000198556 | ZNF789     | -1.49E+00 | 8.74E-04 | 2.52E-03 |
| ENSG00000198182 | ZNF607     | -1.31E+00 | 8.78E-04 | 2.53E-03 |
| ENSG00000197872 | FAM49A     | -3.21E+00 | 8.81E-04 | 2.54E-03 |
| ENSG00000162959 | MEMO1      | -1.19E+00 | 8.87E-04 | 2.55E-03 |
| ENSG00000179841 | AKAP5      | -1.94E+00 | 8.98E-04 | 2.58E-03 |
| ENSG00000198722 | UNC13B     | -1.17E+00 | 9.13E-04 | 2.62E-03 |
| ENSG00000113369 | ARRDC3     | -1.11E+00 | 9.24E-04 | 2.65E-03 |
| ENSG00000063177 | RPL18      | -1.07E+00 | 9.26E-04 | 2.65E-03 |
| ENSG00000152804 | HHEX       | -1.27E+00 | 9.93E-04 | 2.83E-03 |
| ENSG00000153107 | ANAPC1     | -1.02E+00 | 9.94E-04 | 2.83E-03 |
| ENSG00000116771 | AGMAT      | -2.48E+00 | 1.02E-03 | 2.88E-03 |
| ENSG00000144362 | PHOSPHO2   | -1.99E+00 | 1.02E-03 | 2.90E-03 |
| ENSG00000078098 | FAP        | -3.65E+00 | 1.03E-03 | 2.93E-03 |
| ENSG00000166922 | SCG5       | -2.31E+00 | 1.03E-03 | 2.93E-03 |
| ENSG00000135622 | SEMA4F     | -1.33E+00 | 1.03E-03 | 2.93E-03 |
| ENSG00000174871 | CNIH2      | -1.48E+00 | 1.04E-03 | 2.96E-03 |
| ENSG00000175573 | C11orf68   | -1.06E+00 | 1.07E-03 | 3.01E-03 |
| ENSG00000273983 | HIST1H3G   | -2.88E+00 | 1.09E-03 | 3.08E-03 |
| ENSG00000099330 | OCEL1      | -1.18E+00 | 1.11E-03 | 3.12E-03 |

|                 |            |           |          |          |
|-----------------|------------|-----------|----------|----------|
| ENSG00000196793 | ZNF239     | -2.76E+00 | 1.11E-03 | 3.13E-03 |
| ENSG00000164400 | CSF2       | -1.50E+00 | 1.11E-03 | 3.13E-03 |
| ENSG00000106415 | GLCCI1     | -1.45E+00 | 1.16E-03 | 3.25E-03 |
| ENSG00000163517 | HDAC11     | -1.88E+00 | 1.17E-03 | 3.28E-03 |
| ENSG00000027075 | PRKCH      | -1.34E+00 | 1.17E-03 | 3.29E-03 |
| ENSG00000267508 | ZNF285     | -2.04E+00 | 1.18E-03 | 3.32E-03 |
| ENSG00000271503 | CCL5       | -2.87E+00 | 1.22E-03 | 3.41E-03 |
| ENSG00000073849 | ST6GAL1    | -1.46E+00 | 1.23E-03 | 3.44E-03 |
| ENSG00000172785 | CBWD1      | -1.18E+00 | 1.26E-03 | 3.50E-03 |
| ENSG00000214944 | ARHGEF28   | -1.23E+00 | 1.26E-03 | 3.51E-03 |
| ENSG00000108515 | ENO3       | -1.58E+00 | 1.26E-03 | 3.51E-03 |
| ENSG00000177283 | FZD8       | -1.29E+00 | 1.28E-03 | 3.56E-03 |
| ENSG00000135124 | P2RX4      | -1.34E+00 | 1.28E-03 | 3.56E-03 |
| ENSG00000165124 | SVEP1      | -1.15E+00 | 1.28E-03 | 3.57E-03 |
| ENSG00000151490 | PTPRO      | -3.33E+00 | 1.29E-03 | 3.58E-03 |
| ENSG00000263272 | AC004148.1 | -1.12E+00 | 1.29E-03 | 3.59E-03 |
| ENSG00000235363 | SNRPGP10   | -2.12E+00 | 1.33E-03 | 3.69E-03 |
| ENSG00000167528 | ZNF641     | -2.41E+00 | 1.33E-03 | 3.70E-03 |
| ENSG00000254682 | AP002387.2 | -2.40E+00 | 1.34E-03 | 3.72E-03 |
| ENSG00000070778 | PTPN21     | -1.52E+00 | 1.35E-03 | 3.74E-03 |
| ENSG00000243680 | RPL37P23   | -1.51E+00 | 1.37E-03 | 3.80E-03 |
| ENSG00000146677 | AC004453.1 | -1.13E+00 | 1.40E-03 | 3.87E-03 |
| ENSG00000162407 | PLPP3      | -1.94E+00 | 1.43E-03 | 3.94E-03 |
| ENSG00000159885 | ZNF222     | -1.32E+00 | 1.46E-03 | 4.00E-03 |
| ENSG00000162892 | IL24       | -3.84E+00 | 1.48E-03 | 4.05E-03 |
| ENSG00000119711 | ALDH6A1    | -1.18E+00 | 1.50E-03 | 4.12E-03 |
| ENSG00000213442 | RPL18AP3   | -1.51E+00 | 1.53E-03 | 4.20E-03 |
| ENSG00000197863 | ZNF790     | -1.49E+00 | 1.55E-03 | 4.23E-03 |
| ENSG00000170390 | DCLK2      | -1.63E+00 | 1.57E-03 | 4.30E-03 |
| ENSG00000128000 | ZNF780B    | -1.25E+00 | 1.61E-03 | 4.37E-03 |
| ENSG00000105640 | RPL18A     | -1.20E+00 | 1.66E-03 | 4.51E-03 |
| ENSG00000137720 | C11orf1    | -1.08E+00 | 1.68E-03 | 4.56E-03 |
| ENSG00000138640 | FAM13A     | -1.02E+00 | 1.68E-03 | 4.56E-03 |
| ENSG00000168734 | PKIG       | -1.08E+00 | 1.68E-03 | 4.56E-03 |
| ENSG00000231574 | LINC02015  | -3.83E+00 | 1.69E-03 | 4.58E-03 |
| ENSG00000213178 | RPL22P1    | -2.96E+00 | 1.69E-03 | 4.59E-03 |
| ENSG00000026950 | BTN3A1     | -1.08E+00 | 1.71E-03 | 4.62E-03 |
| ENSG00000267745 | AC060766.7 | -2.00E+00 | 1.76E-03 | 4.75E-03 |
| ENSG00000100003 | SEC14L2    | -1.15E+00 | 1.78E-03 | 4.80E-03 |
| ENSG00000157426 | AASDH      | -1.09E+00 | 1.82E-03 | 4.90E-03 |
| ENSG00000056998 | GYG2       | -2.89E+00 | 1.82E-03 | 4.90E-03 |
| ENSG00000135378 | PRRG4      | -1.57E+00 | 1.84E-03 | 4.94E-03 |
| ENSG00000164929 | BAALC      | -2.23E+00 | 1.88E-03 | 5.05E-03 |
| ENSG00000136942 | RPL35      | -1.45E+00 | 1.88E-03 | 5.05E-03 |
| ENSG00000149380 | P4HA3      | -1.77E+00 | 1.90E-03 | 5.08E-03 |

|                 |             |           |          |          |
|-----------------|-------------|-----------|----------|----------|
| ENSG00000225405 | RPS15AP17   | -1.02E+00 | 1.91E-03 | 5.12E-03 |
| ENSG00000163322 | ABRAXAS1    | -1.30E+00 | 1.93E-03 | 5.16E-03 |
| ENSG00000187479 | C11orf96    | -1.22E+00 | 1.93E-03 | 5.17E-03 |
| ENSG00000274605 | PCCA-DT     | -1.32E+00 | 1.99E-03 | 5.31E-03 |
| ENSG00000173163 | COMMD1      | -1.12E+00 | 2.00E-03 | 5.32E-03 |
| ENSG00000048342 | CC2D2A      | -1.44E+00 | 2.01E-03 | 5.37E-03 |
| ENSG00000164116 | GUCY1A1     | -1.88E+00 | 2.03E-03 | 5.41E-03 |
| ENSG00000108960 | MMD         | -1.07E+00 | 2.06E-03 | 5.47E-03 |
| ENSG00000266378 | AC005224.2  | -2.10E+00 | 2.13E-03 | 5.65E-03 |
| ENSG00000197147 | LRRC8B      | -1.20E+00 | 2.18E-03 | 5.78E-03 |
| ENSG00000249353 | NPM1P27     | -2.84E+00 | 2.22E-03 | 5.86E-03 |
| ENSG00000212123 | PRR22       | -1.25E+00 | 2.22E-03 | 5.88E-03 |
| ENSG00000177105 | RHOG        | -1.07E+00 | 2.27E-03 | 5.99E-03 |
| ENSG00000245248 | USP2-AS1    | -2.75E+00 | 2.29E-03 | 6.03E-03 |
| ENSG00000240342 | RPS2P5      | -2.10E+00 | 2.30E-03 | 6.06E-03 |
| ENSG00000226532 | AL022718.1  | -1.18E+00 | 2.34E-03 | 6.15E-03 |
| ENSG00000266962 | AC067852.2  | -1.24E+00 | 2.36E-03 | 6.20E-03 |
| ENSG00000225377 | NRSN2-AS1   | -1.54E+00 | 2.44E-03 | 6.39E-03 |
| ENSG00000228109 | MELTF-AS1   | -1.27E+00 | 2.46E-03 | 6.44E-03 |
| ENSG00000117010 | ZNF684      | -1.17E+00 | 2.50E-03 | 6.53E-03 |
| ENSG00000130751 | NPAS1       | -1.11E+00 | 2.54E-03 | 6.63E-03 |
| ENSG00000169964 | TMEM42      | -1.01E+00 | 2.57E-03 | 6.70E-03 |
| ENSG00000262814 | MRPL12      | -1.10E+00 | 2.60E-03 | 6.76E-03 |
| ENSG00000124613 | ZNF391      | -1.70E+00 | 2.65E-03 | 6.87E-03 |
| ENSG00000175322 | ZNF519      | -1.11E+00 | 2.71E-03 | 7.03E-03 |
| ENSG00000118492 | ADGB        | -4.26E+00 | 2.75E-03 | 7.13E-03 |
| ENSG00000172878 | METAP1D     | -1.39E+00 | 2.76E-03 | 7.14E-03 |
| ENSG00000259727 | AC103740.2  | -2.40E+00 | 2.81E-03 | 7.27E-03 |
| ENSG00000100147 | CCDC134     | -1.62E+00 | 2.84E-03 | 7.32E-03 |
| ENSG00000049239 | H6PD        | -1.44E+00 | 2.84E-03 | 7.34E-03 |
| ENSG00000275131 | AC241952.1  | -2.83E+00 | 2.86E-03 | 7.37E-03 |
| ENSG00000230082 | PRRT3-AS1   | -2.97E+00 | 3.00E-03 | 7.72E-03 |
| ENSG00000132031 | MATN3       | -1.48E+00 | 3.08E-03 | 7.92E-03 |
| ENSG00000134809 | TIMM10      | -1.24E+00 | 3.15E-03 | 8.06E-03 |
| ENSG00000242779 | ZNF702P     | -1.28E+00 | 3.18E-03 | 8.15E-03 |
| ENSG00000154721 | JAM2        | -1.78E+00 | 3.20E-03 | 8.19E-03 |
| ENSG00000164330 | EBF1        | -1.53E+00 | 3.23E-03 | 8.26E-03 |
| ENSG00000272447 | AL135925.1  | -1.44E+00 | 3.26E-03 | 8.33E-03 |
| ENSG00000163888 | CAMK2N2     | -1.09E+00 | 3.34E-03 | 8.52E-03 |
| ENSG00000164683 | HEY1        | -1.16E+00 | 3.35E-03 | 8.54E-03 |
| ENSG00000267102 | AC060766.1  | -2.08E+00 | 3.35E-03 | 8.54E-03 |
| ENSG00000115525 | ST3GAL5     | -1.05E+00 | 3.38E-03 | 8.60E-03 |
| ENSG00000247157 | LINC01252   | -2.43E+00 | 3.39E-03 | 8.63E-03 |
| ENSG00000236088 | COX10-AS1   | -1.64E+00 | 3.41E-03 | 8.66E-03 |
| ENSG00000242242 | NECTIN3-AS1 | -3.88E+00 | 3.42E-03 | 8.68E-03 |

|                 |            |           |          |          |
|-----------------|------------|-----------|----------|----------|
| ENSG00000276778 | LINC02227  | -2.83E+00 | 3.42E-03 | 8.68E-03 |
| ENSG00000182057 | OGFRP1     | -2.48E+00 | 3.43E-03 | 8.71E-03 |
| ENSG00000241494 | AL355032.1 | -1.03E+00 | 3.45E-03 | 8.74E-03 |
| ENSG00000158715 | SLC45A3    | -1.21E+00 | 3.63E-03 | 9.14E-03 |
| ENSG00000246985 | SOCS2-AS1  | -2.51E+00 | 3.76E-03 | 9.44E-03 |
| ENSG00000062370 | ZNF112     | -1.32E+00 | 3.77E-03 | 9.48E-03 |
| ENSG00000135917 | SLC19A3    | -3.31E+00 | 3.92E-03 | 9.81E-03 |
| ENSG00000143942 | CHAC2      | -1.16E+00 | 3.94E-03 | 9.88E-03 |
| ENSG00000156509 | FBXO43     | -1.80E+00 | 3.95E-03 | 9.88E-03 |
| ENSG00000281468 | AC006504.7 | -1.14E+00 | 3.99E-03 | 9.98E-03 |
| ENSG00000251003 | ZFPM2-AS1  | -1.29E+00 | 4.01E-03 | 1.00E-02 |
| ENSG00000187607 | ZNF286A    | -1.31E+00 | 4.14E-03 | 1.03E-02 |
| ENSG00000279191 | AC068491.4 | -1.26E+00 | 4.16E-03 | 1.04E-02 |
| ENSG00000264350 | SNRPGP2    | -1.42E+00 | 4.19E-03 | 1.04E-02 |
| ENSG00000250634 | LINC01182  | -2.97E+00 | 4.21E-03 | 1.05E-02 |
| ENSG00000165905 | LARGE2     | -2.00E+00 | 4.44E-03 | 1.10E-02 |
| ENSG00000213553 | RPLP0P6    | -3.28E+00 | 4.50E-03 | 1.11E-02 |
| ENSG00000196636 | SDHAF3     | -1.23E+00 | 4.53E-03 | 1.12E-02 |
| ENSG00000250562 | RPL38P4    | -1.46E+00 | 4.54E-03 | 1.12E-02 |
| ENSG00000155666 | KDM8       | -1.50E+00 | 4.62E-03 | 1.14E-02 |
| ENSG00000136682 | CBWD2      | -1.56E+00 | 4.63E-03 | 1.14E-02 |
| ENSG00000050438 | SLC4A8     | -1.08E+00 | 4.64E-03 | 1.15E-02 |
| ENSG00000090932 | DLL3       | -1.09E+00 | 4.65E-03 | 1.15E-02 |
| ENSG00000134516 | DOCK2      | -3.05E+00 | 4.71E-03 | 1.16E-02 |
| ENSG00000251194 | AL133330.1 | -1.52E+00 | 4.81E-03 | 1.18E-02 |
| ENSG00000183798 | EMILIN3    | -1.83E+00 | 4.89E-03 | 1.20E-02 |
| ENSG00000206535 | LNP1       | -1.56E+00 | 4.94E-03 | 1.21E-02 |
| ENSG00000253522 | MIR3142HG  | -3.84E+00 | 5.01E-03 | 1.23E-02 |
| ENSG00000150995 | ITPR1      | -1.28E+00 | 5.09E-03 | 1.25E-02 |
| ENSG00000176933 | TOB2P1     | -2.19E+00 | 5.13E-03 | 1.26E-02 |
| ENSG00000212588 | SNORA26    | -3.68E+00 | 5.15E-03 | 1.26E-02 |
| ENSG00000197444 | OGDHL      | -1.74E+00 | 5.23E-03 | 1.28E-02 |
| ENSG00000047936 | ROS1       | -3.28E+00 | 5.24E-03 | 1.28E-02 |
| ENSG00000164056 | SPRY1      | -1.49E+00 | 5.34E-03 | 1.30E-02 |
| ENSG00000235065 | RPL24P2    | -1.41E+00 | 5.37E-03 | 1.31E-02 |
| ENSG00000217825 | AC099552.1 | -3.77E+00 | 5.42E-03 | 1.32E-02 |
| ENSG00000227496 | AC099066.2 | -1.78E+00 | 5.44E-03 | 1.32E-02 |
| ENSG00000205571 | SMN2       | -1.49E+00 | 5.50E-03 | 1.34E-02 |
| ENSG00000196476 | C20orf96   | -1.28E+00 | 5.55E-03 | 1.35E-02 |
| ENSG00000137142 | IGFBPL1    | -1.67E+00 | 5.59E-03 | 1.35E-02 |
| ENSG00000160094 | ZNF362     | -1.06E+00 | 5.60E-03 | 1.36E-02 |
| ENSG00000198947 | DMD        | -1.18E+00 | 5.65E-03 | 1.37E-02 |
| ENSG00000109255 | NMU        | -1.33E+00 | 5.68E-03 | 1.37E-02 |
| ENSG00000167912 | AC090152.1 | -3.33E+00 | 5.70E-03 | 1.38E-02 |
| ENSG00000267547 | AC060766.4 | -2.39E+00 | 5.75E-03 | 1.39E-02 |



|                 |            |           |          |          |
|-----------------|------------|-----------|----------|----------|
| ENSG00000065413 | ANKRD44    | -1.16E+00 | 5.86E-03 | 1.41E-02 |
| ENSG00000280744 | LINC01173  | -3.54E+00 | 5.91E-03 | 1.42E-02 |
| ENSG00000204623 | ZNRD1ASP   | -1.36E+00 | 5.92E-03 | 1.43E-02 |
| ENSG00000267152 | AC093227.1 | -2.02E+00 | 5.94E-03 | 1.43E-02 |
| ENSG00000180354 | MTURN      | -1.17E+00 | 5.97E-03 | 1.43E-02 |
| ENSG00000224114 | AL591846.1 | -1.10E+00 | 6.05E-03 | 1.45E-02 |
| ENSG00000132688 | NES        | -1.36E+00 | 6.08E-03 | 1.46E-02 |
| ENSG00000185442 | FAM174B    | -1.87E+00 | 6.09E-03 | 1.46E-02 |
| ENSG00000271614 | ATP2B1-AS1 | -1.47E+00 | 6.19E-03 | 1.48E-02 |
| ENSG00000111348 | ARHGDI1    | -2.07E+00 | 6.22E-03 | 1.49E-02 |
| ENSG00000204767 | INSYN2B    | -2.02E+00 | 6.29E-03 | 1.50E-02 |
| ENSG00000117594 | HSD11B1    | -3.66E+00 | 6.35E-03 | 1.52E-02 |
| ENSG00000137752 | CASP1      | -1.90E+00 | 6.37E-03 | 1.52E-02 |
| ENSG00000177990 | DPY19L2    | -2.34E+00 | 6.45E-03 | 1.54E-02 |
| ENSG00000198732 | SMOC1      | -3.11E+00 | 6.53E-03 | 1.55E-02 |
| ENSG00000154548 | SRSF12     | -1.83E+00 | 6.58E-03 | 1.57E-02 |
| ENSG00000241942 | RPS20P20   | -3.18E+00 | 6.64E-03 | 1.58E-02 |
| ENSG00000129354 | AP1M2      | -1.15E+00 | 6.67E-03 | 1.58E-02 |
| ENSG00000196549 | MME        | -1.82E+00 | 6.68E-03 | 1.59E-02 |
| ENSG00000196418 | ZNF124     | -1.60E+00 | 6.73E-03 | 1.60E-02 |
| ENSG00000214575 | CPEB1      | -1.08E+00 | 6.74E-03 | 1.60E-02 |
| ENSG00000138316 | ADAMTS14   | -1.87E+00 | 6.84E-03 | 1.62E-02 |
| ENSG00000168237 | GLYCTK     | -1.05E+00 | 6.85E-03 | 1.62E-02 |
| ENSG00000259571 | BLID       | -3.13E+00 | 6.99E-03 | 1.65E-02 |
| ENSG00000273270 | AC090114.2 | -1.44E+00 | 7.13E-03 | 1.68E-02 |
| ENSG00000107902 | LHPP       | -1.39E+00 | 7.16E-03 | 1.69E-02 |
| ENSG00000269837 | IPO5P1     | -1.70E+00 | 7.27E-03 | 1.71E-02 |
| ENSG00000276261 | AC009509.4 | -2.46E+00 | 7.30E-03 | 1.71E-02 |
| ENSG00000267260 | AC020928.1 | -3.12E+00 | 7.34E-03 | 1.72E-02 |
| ENSG00000259867 | AC105411.1 | -2.81E+00 | 7.36E-03 | 1.73E-02 |
| ENSG00000242094 | FOXP1-IT1  | -1.84E+00 | 7.45E-03 | 1.75E-02 |
| ENSG00000167595 | PROSER3    | -1.01E+00 | 7.51E-03 | 1.76E-02 |
| ENSG00000106537 | TSPAN13    | -1.55E+00 | 7.52E-03 | 1.76E-02 |
| ENSG00000236682 | MAP3K2-DT  | -1.24E+00 | 7.55E-03 | 1.77E-02 |
| ENSG00000080511 | RDH8       | -2.82E+00 | 7.66E-03 | 1.79E-02 |
| ENSG00000224020 | MIR181A2HG | -3.40E+00 | 7.73E-03 | 1.81E-02 |
| ENSG00000150627 | WDR17      | -2.06E+00 | 7.76E-03 | 1.81E-02 |
| ENSG00000283041 | AC008038.1 | -1.08E+00 | 7.77E-03 | 1.81E-02 |
| ENSG00000178878 | APOLD1     | -1.22E+00 | 7.96E-03 | 1.85E-02 |
| ENSG00000188763 | FZD9       | -1.94E+00 | 8.03E-03 | 1.87E-02 |
| ENSG00000161558 | TMEM143    | -2.66E+00 | 8.05E-03 | 1.87E-02 |
| ENSG00000278535 | DHRS11     | -1.02E+00 | 8.12E-03 | 1.89E-02 |
| ENSG00000182518 | FAM104B    | -1.05E+00 | 8.14E-03 | 1.89E-02 |
| ENSG00000232346 | Z74021.1   | -1.40E+00 | 8.21E-03 | 1.90E-02 |
| ENSG00000224063 | AC007319.1 | -2.12E+00 | 8.23E-03 | 1.91E-02 |

|                 |            |           |          |          |
|-----------------|------------|-----------|----------|----------|
| ENSG00000147894 | C9orf72    | -2.39E+00 | 8.55E-03 | 1.97E-02 |
| ENSG00000168811 | IL12A      | -2.34E+00 | 8.68E-03 | 2.00E-02 |
| ENSG00000241431 | RPL37P6    | -2.47E+00 | 8.76E-03 | 2.02E-02 |
| ENSG00000234797 | RPS3AP6    | -1.51E+00 | 8.79E-03 | 2.02E-02 |
| ENSG00000277383 | AC010331.1 | -2.17E+00 | 8.93E-03 | 2.05E-02 |
| ENSG00000116117 | PAR3B      | -2.44E+00 | 9.00E-03 | 2.07E-02 |
| ENSG00000183055 | FAM133CP   | -1.63E+00 | 9.02E-03 | 2.07E-02 |
| ENSG00000123427 | EEF1AKMT3  | -1.14E+00 | 9.29E-03 | 2.13E-02 |
| ENSG00000198478 | SH3BGR2    | -1.77E+00 | 9.37E-03 | 2.14E-02 |
| ENSG00000126970 | ZC4H2      | -1.48E+00 | 9.46E-03 | 2.16E-02 |
| ENSG00000247137 | AP000873.2 | -1.03E+00 | 9.55E-03 | 2.18E-02 |
| ENSG00000272440 | AC080013.6 | -2.39E+00 | 9.73E-03 | 2.21E-02 |
| ENSG00000226084 | AC113935.1 | -1.30E+00 | 9.75E-03 | 2.22E-02 |
| ENSG00000156265 | MAP3K7CL   | -1.98E+00 | 9.79E-03 | 2.23E-02 |
| ENSG00000203930 | LINC00632  | -1.14E+00 | 1.00E-02 | 2.27E-02 |
| ENSG00000240376 | AC010343.1 | -1.49E+00 | 1.00E-02 | 2.28E-02 |
| ENSG00000159433 | STARD9     | -1.12E+00 | 1.00E-02 | 2.28E-02 |
| ENSG00000135469 | COQ10A     | -1.29E+00 | 1.02E-02 | 2.31E-02 |
| ENSG00000273723 | AL139089.1 | -2.94E+00 | 1.03E-02 | 2.33E-02 |
| ENSG00000274667 | AC090517.2 | -2.92E+00 | 1.03E-02 | 2.33E-02 |
| ENSG00000271870 | AC024060.2 | -1.24E+00 | 1.04E-02 | 2.34E-02 |
| ENSG00000174586 | ZNF497     | -2.96E+00 | 1.05E-02 | 2.37E-02 |
| ENSG00000147041 | SYTL5      | -2.16E+00 | 1.06E-02 | 2.38E-02 |
| ENSG00000250130 | AC090519.1 | -2.59E+00 | 1.08E-02 | 2.43E-02 |
| ENSG00000134533 | RERG       | -3.13E+00 | 1.10E-02 | 2.47E-02 |
| ENSG00000166707 | ZCCHC18    | -2.63E+00 | 1.10E-02 | 2.47E-02 |
| ENSG00000147145 | LPAR4      | -2.56E+00 | 1.11E-02 | 2.49E-02 |
| ENSG00000228696 | ARL17B     | -1.28E+00 | 1.11E-02 | 2.49E-02 |
| ENSG00000169660 | HEXD       | -1.08E+00 | 1.11E-02 | 2.49E-02 |
| ENSG00000144182 | LIPT1      | -1.28E+00 | 1.12E-02 | 2.50E-02 |
| ENSG00000242970 | AC068522.1 | -3.38E+00 | 1.12E-02 | 2.51E-02 |
| ENSG00000107719 | PALD1      | -1.39E+00 | 1.14E-02 | 2.54E-02 |
| ENSG00000166046 | TCP11L2    | -2.76E+00 | 1.16E-02 | 2.58E-02 |
| ENSG00000243199 | AC115223.1 | -3.21E+00 | 1.17E-02 | 2.60E-02 |
| ENSG00000275457 | AL117332.1 | -1.10E+00 | 1.18E-02 | 2.63E-02 |
| ENSG00000166321 | NUDT13     | -1.81E+00 | 1.19E-02 | 2.65E-02 |
| ENSG00000242960 | FTH1P23    | -2.90E+00 | 1.20E-02 | 2.68E-02 |
| ENSG00000138336 | TET1       | -1.15E+00 | 1.21E-02 | 2.68E-02 |
| ENSG00000121895 | TMEM156    | -1.20E+00 | 1.22E-02 | 2.72E-02 |
| ENSG00000133863 | TEX15      | -1.73E+00 | 1.25E-02 | 2.77E-02 |
| ENSG00000173715 | C11orf80   | -2.00E+00 | 1.28E-02 | 2.82E-02 |
| ENSG00000162745 | OLFML2B    | -1.55E+00 | 1.30E-02 | 2.87E-02 |
| ENSG00000062582 | MRPS24     | -2.11E+00 | 1.30E-02 | 2.87E-02 |
| ENSG00000214029 | ZNF891     | -1.23E+00 | 1.31E-02 | 2.89E-02 |
| ENSG00000239227 | AC069439.1 | -2.09E+00 | 1.32E-02 | 2.91E-02 |

|                 |            |           |          |          |
|-----------------|------------|-----------|----------|----------|
| ENSG00000286132 | AC022415.2 | -2.57E+00 | 1.32E-02 | 2.92E-02 |
| ENSG00000008277 | ADAM22     | -1.63E+00 | 1.36E-02 | 2.98E-02 |
| ENSG00000256061 | DNAAF4     | -1.79E+00 | 1.37E-02 | 3.01E-02 |
| ENSG00000180537 | RNF182     | -1.62E+00 | 1.38E-02 | 3.02E-02 |
| ENSG00000244586 | WNT5A-AS1  | -2.87E+00 | 1.38E-02 | 3.02E-02 |
| ENSG00000247809 | NR2F2-AS1  | -1.96E+00 | 1.38E-02 | 3.03E-02 |
| ENSG00000182179 | UBA7       | -1.00E+00 | 1.40E-02 | 3.06E-02 |
| ENSG00000234779 | BNC2-AS1   | -2.06E+00 | 1.40E-02 | 3.07E-02 |
| ENSG00000079263 | SP140      | -2.78E+00 | 1.42E-02 | 3.10E-02 |
| ENSG00000233264 | AC006042.3 | -2.96E+00 | 1.42E-02 | 3.10E-02 |
| ENSG00000237943 | PRKCQ-AS1  | -1.09E+00 | 1.43E-02 | 3.12E-02 |
| ENSG00000171766 | GATM       | -1.93E+00 | 1.44E-02 | 3.13E-02 |
| ENSG00000151692 | RNF144A    | -1.08E+00 | 1.44E-02 | 3.14E-02 |
| ENSG00000224043 | CCNT2-AS1  | -1.06E+00 | 1.44E-02 | 3.15E-02 |
| ENSG00000254510 | AP001107.5 | -1.79E+00 | 1.46E-02 | 3.17E-02 |
| ENSG00000101986 | ABCD1      | -1.07E+00 | 1.49E-02 | 3.23E-02 |
| ENSG00000230844 | ZNF674-AS1 | -1.27E+00 | 1.53E-02 | 3.32E-02 |
| ENSG00000111696 | NT5DC3     | -1.38E+00 | 1.54E-02 | 3.32E-02 |
| ENSG00000260920 | AL031985.3 | -1.23E+00 | 1.54E-02 | 3.33E-02 |
| ENSG00000231167 | YBX1P2     | -3.03E+00 | 1.55E-02 | 3.35E-02 |
| ENSG00000222489 | SNORA79B   | -2.56E+00 | 1.56E-02 | 3.37E-02 |
| ENSG00000147996 | CBWD5      | -1.57E+00 | 1.57E-02 | 3.39E-02 |
| ENSG00000269927 | AC004817.3 | -3.02E+00 | 1.59E-02 | 3.43E-02 |
| ENSG00000230979 | AC079250.1 | -1.44E+00 | 1.61E-02 | 3.46E-02 |
| ENSG00000274997 | HIST1H2AH  | -2.61E+00 | 1.61E-02 | 3.47E-02 |
| ENSG00000270019 | AC110769.2 | -1.21E+00 | 1.62E-02 | 3.48E-02 |
| ENSG00000279673 | AC092919.2 | -2.94E+00 | 1.62E-02 | 3.48E-02 |
| ENSG00000224895 | VPS26BP1   | -2.84E+00 | 1.62E-02 | 3.49E-02 |
| ENSG00000181619 | GPR135     | -1.27E+00 | 1.66E-02 | 3.56E-02 |
| ENSG00000180596 | HIST1H2BC  | -1.67E+00 | 1.66E-02 | 3.57E-02 |
| ENSG00000174516 | PELI3      | -1.12E+00 | 1.68E-02 | 3.59E-02 |
| ENSG00000279166 | AC009951.4 | -1.82E+00 | 1.68E-02 | 3.59E-02 |
| ENSG00000280106 | AC008555.7 | -3.37E+00 | 1.69E-02 | 3.61E-02 |
| ENSG00000128039 | SRD5A3     | -1.01E+00 | 1.70E-02 | 3.64E-02 |
| ENSG00000170522 | ELOVL6     | -1.02E+00 | 1.72E-02 | 3.67E-02 |
| ENSG00000138738 | PRDM5      | -1.18E+00 | 1.75E-02 | 3.72E-02 |
| ENSG00000171044 | XKR6       | -1.07E+00 | 1.75E-02 | 3.72E-02 |
| ENSG00000137673 | MMP7       | -3.28E+00 | 1.79E-02 | 3.79E-02 |
| ENSG00000225224 | RPS27AP12  | -1.41E+00 | 1.80E-02 | 3.82E-02 |
| ENSG00000261051 | AC107021.2 | -1.72E+00 | 1.81E-02 | 3.83E-02 |
| ENSG00000196081 | ZNF724     | -1.01E+00 | 1.82E-02 | 3.86E-02 |
| ENSG00000254337 | AC083967.1 | -3.01E+00 | 1.83E-02 | 3.86E-02 |
| ENSG00000279133 | AC018628.1 | -1.11E+00 | 1.83E-02 | 3.87E-02 |
| ENSG00000220744 | RPL5P18    | -2.41E+00 | 1.85E-02 | 3.90E-02 |
| ENSG00000102221 | JADE3      | -1.01E+00 | 1.87E-02 | 3.94E-02 |

|                 |            |           |          |          |
|-----------------|------------|-----------|----------|----------|
| ENSG00000007255 | TRAPPC6A   | -1.36E+00 | 1.88E-02 | 3.96E-02 |
| ENSG00000116852 | KIF21B     | -1.41E+00 | 1.89E-02 | 3.98E-02 |
| ENSG00000286808 | AC092338.3 | -3.17E+00 | 1.92E-02 | 4.04E-02 |
| ENSG00000106631 | MYL7       | -1.16E+00 | 1.93E-02 | 4.06E-02 |
| ENSG00000248927 | AC114284.1 | -2.70E+00 | 1.97E-02 | 4.14E-02 |
| ENSG00000225616 | AL138785.1 | -1.29E+00 | 2.01E-02 | 4.21E-02 |
| ENSG00000213598 | AL049873.1 | -2.13E+00 | 2.01E-02 | 4.21E-02 |
| ENSG00000272711 | AC019069.1 | -1.66E+00 | 2.01E-02 | 4.22E-02 |
| ENSG00000227598 | Z94721.1   | -2.71E+00 | 2.03E-02 | 4.24E-02 |
| ENSG00000268471 | MIR4453HG  | -2.07E+00 | 2.04E-02 | 4.26E-02 |
| ENSG00000178233 | TMEM151B   | -2.84E+00 | 2.04E-02 | 4.26E-02 |
| ENSG00000152926 | ZNF117     | -1.21E+00 | 2.06E-02 | 4.29E-02 |
| ENSG00000268895 | A1BG-AS1   | -1.02E+00 | 2.06E-02 | 4.30E-02 |
| ENSG00000126785 | RHOJ       | -2.37E+00 | 2.08E-02 | 4.34E-02 |
| ENSG00000250571 | GLI4       | -1.05E+00 | 2.11E-02 | 4.40E-02 |
| ENSG00000223949 | ROR1-AS1   | -3.46E+00 | 2.12E-02 | 4.42E-02 |
| ENSG00000054277 | OPN3       | -1.21E+00 | 2.15E-02 | 4.46E-02 |
| ENSG00000167925 | GHDC       | -1.13E+00 | 2.16E-02 | 4.49E-02 |
| ENSG00000276174 | AC087683.2 | -2.44E+00 | 2.16E-02 | 4.49E-02 |
| ENSG00000225933 | AC133965.1 | -2.07E+00 | 2.17E-02 | 4.50E-02 |
| ENSG00000277342 | AC048344.4 | -1.95E+00 | 2.17E-02 | 4.51E-02 |
| ENSG00000263072 | ZNF213-AS1 | -1.07E+00 | 2.20E-02 | 4.56E-02 |
| ENSG00000079215 | SLC1A3     | -1.63E+00 | 2.20E-02 | 4.56E-02 |
| ENSG00000270072 | AC090559.2 | -2.58E+00 | 2.21E-02 | 4.57E-02 |
| ENSG00000266944 | AC005262.1 | -1.11E+00 | 2.23E-02 | 4.60E-02 |
| ENSG00000179240 | GVQW3      | -1.72E+00 | 2.24E-02 | 4.62E-02 |
| ENSG00000173898 | SPTBN2     | -1.10E+00 | 2.24E-02 | 4.63E-02 |
| ENSG00000165449 | SLC16A9    | -1.04E+00 | 2.28E-02 | 4.71E-02 |
| ENSG00000144227 | NXPH2      | -1.82E+00 | 2.29E-02 | 4.71E-02 |
| ENSG00000214455 | RCN1P2     | -2.35E+00 | 2.30E-02 | 4.73E-02 |
| ENSG00000164935 | DCSTAMP    | -2.14E+00 | 2.31E-02 | 4.76E-02 |
| ENSG00000270190 | AC068491.3 | -1.66E+00 | 2.36E-02 | 4.84E-02 |
| ENSG00000239719 | AC004890.1 | -1.08E+00 | 2.37E-02 | 4.86E-02 |
| ENSG00000151743 | AMN1       | -1.11E+00 | 2.39E-02 | 4.90E-02 |
| ENSG00000169083 | AR         | -1.28E+00 | 2.41E-02 | 4.93E-02 |
| ENSG00000185065 | AC000068.1 | -1.96E+00 | 2.44E-02 | 4.99E-02 |

**Supplementary table 11. KEGG pathway analysis for significant URGs with and without IL-1 $\beta$  stimulation in non-transduced samples.**

| Pathway                                                    | P value  | FDR      | Enriched genes                                                                                                                                                                                                           |
|------------------------------------------------------------|----------|----------|--------------------------------------------------------------------------------------------------------------------------------------------------------------------------------------------------------------------------|
| TNF signaling pathway                                      | 2.70E-21 | 4.59E-19 | CSF2, TNFAIP3, PIK3CD, CXCL1, CXCL3, PTGS2, CXCL2, ICAM1, CCL5, CCL2, MAP3K8, MAP3K5, MAP2K3, JUN, VCAM1, JAG1, CCL20, MMP3, LIF, CFLAR, TRAF1, MMP9, NFKB1, NFKBIA, IL6, IL1B, BIRC2, BIRC3, CREB5                      |
| Cytokine-cytokine receptor interaction                     | 2.34E-12 | 1.98E-10 | CXCL6, CSF3, CCL11, CSF2, CXCL8, IL24, CXCL1, TNFRSF11B, CXCL3, CXCL2, CCL8, CCL7, CCL5, CCL2, IL6R, IL11, TGFB2, IL4R, CD70, CCL20, IL1R1, TNFSF15, TNFRSF9, LIF, INHBA, TNFRSF10D, IL6, IL1B, LTB, IL7R                |
| NF-kappa B signaling pathway                               | 4.54E-11 | 2.58E-09 | LYN, VCAM1, CXCL8, BCL2A1, IL1R1, TNFAIP3, CFLAR, TRAF1, PTGS2, NFKB1, RELB, NFKB2, ICAM1, NFKBIA, IL1B, LTB, BIRC2, BIRC3                                                                                               |
| Pathways in cancer                                         | 1.48E-08 | 6.30E-07 | PTGER4, CXCL8, EPAS1, LPAR1, PIK3CD, PTGS2, ETS1, FGF2, EGFR, BDKRB2, BDKRB1, BID, NKX3-1, WNT4, STAT5A, TGFB2, JUN, LAMB3, ITGA2, WNT7B, WNT5A, VEGFC, FZD8, TRAF1, MMP9, NFKB1, NFKB2, NFKBIA, IL6, CDK6, BIRC2, BIRC3 |
| Rheumatoid arthritis                                       | 4.08E-08 | 1.39E-06 | CXCL6, IL11, TGFB2, JUN, FLT1, CXCL8, CSF2, CCL20, MMP3, ICAM1, IL6, IL1B, CCL5, CCL2, LTB                                                                                                                               |
| Legionellosis                                              | 8.78E-08 | 2.49E-06 | NFKBIA, C3, IL6, ITGAM, CXCL8, IL1B, CXCL1, SEC22B, CXCL3, CXCL2, NFKB1, NFKB2                                                                                                                                           |
| NOD-like receptor signaling pathway                        | 1.31E-07 | 3.17E-06 | NFKBIA, IL6, CXCL8, CCL5, IL1B, TNFAIP3, CCL2, CXCL1, CXCL2, NFKB1, BIRC2, BIRC3                                                                                                                                         |
| Chagas disease (American trypanosomiasis)                  | 3.52E-07 | 7.48E-06 | TGFB2, JUN, CXCL8, SERPINE1, PIK3CD, CFLAR, NFKB1, C3, NFKBIA, GNA15, IL6, IL1B, CCL5, BDKRB2, CCL2                                                                                                                      |
| Hematopoietic cell lineage                                 | 1.92E-06 | 3.62E-05 | IL11, CSF3, ITGAM, IL4R, CSF2, TFRC, IL1R1, ITGA2, IL6, IL1B, IL7R, IL6R, CD44                                                                                                                                           |
| HTLV-I infection                                           | 7.13E-06 | 1.21E-04 | STAT5A, TGFB2, JUN, VCAM1, CSF2, MSX2, IL1R1, WNT7B, WNT5A, FZD8, PIK3CD, ETS1, ETS2, NFKB1, RELB, NFKB2, ICAM1, NFKBIA, FOSL1, IL6, WNT4                                                                                |
| Amoebiasis                                                 | 1.55E-05 | 2.40E-04 | SERPINE3, TGFB2, ITGAM, CXCL8, CSF2, SERPINB2, LAMB3, IL1R1, PIK3CD, NFKB1, GNA15, IL6, IL1B                                                                                                                             |
| Chemokine signaling pathway                                | 2.08E-05 | 2.95E-04 | LYN, CXCL6, SHC3, CCL11, CXCL8, CCL20, PIK3CD, CXCL1, CXCL3, CXCL2, NFKB1, NFKBIA, CCL8, CCL7, CCL5, PTK2B, CCL2                                                                                                         |
| Malaria                                                    | 3.00E-05 | 3.93E-04 | CSF3, IL6, TGFB2, VCAM1, CXCL8, IL1B, CCL2, THBS2, ICAM1                                                                                                                                                                 |
| Proteoglycans in cancer                                    | 5.11E-05 | 6.20E-04 | TGFB2, SDC4, CAV2, WNT7B, ITGA2, CAV1, WNT5A, PLAUR, FZD8, PIK3CD, FGF2, MMP9, EGFR, TIMP3, CD44, HBEGF, WNT4                                                                                                            |
| Transcriptional misregulation in cancer                    | 9.26E-05 | 1.05E-03 | ITGAM, FLT1, CXCL8, CSF2, BCL2A1, MMP3, TMPRSS2, HMGA2, PLAT, TRAF1, MMP9, NFKB1, RUNX2, IL6, NFKBIZ                                                                                                                     |
| Apoptosis                                                  | 1.69E-04 | 1.80E-03 | NFKBIA, PIK3CD, CFLAR, NGF, BID, NFKB1, BIRC2, TNFRSF10D, BIRC3                                                                                                                                                          |
| PI3K-Akt signaling pathway                                 | 1.92E-04 | 1.84E-03 | CSF3, IL4R, FLT1, LAMB3, ITGA2, TNC, LPAR1, VEGFC, PIK3CD, NGF, THBS2, FGF2, EGFR, NFKB1, IL6, RELN, CDK6, ITGB8, SGK1, IL7R, IL6R, CREB5                                                                                |
| Inflammatory mediator regulation of TRP channels           | 1.95E-04 | 1.84E-03 | PTGER4, MAP2K3, IL1R1, IL1B, PLA2G4C, BDKRB2, F2RL1, PLA2G4A, PIK3CD, BDKRB1, NGF                                                                                                                                        |
| Focal adhesion                                             | 2.52E-04 | 2.18E-03 | JUN, SHC3, FLT1, LAMB3, CAV2, ITGA2, CAV1, TNC, VEGFC, PIK3CD, THBS2, EGFR, RELN, ITGB8, BIRC2, BIRC3                                                                                                                    |
| MAPK signaling pathway                                     | 2.56E-04 | 2.18E-03 | MAP2K3, TGFB2, JUN, IL1R1, GADD45A, PLA2G4C, PLA2G4A, NGF, DUSP8, FGF2, EGFR, NFKB1, RELB, NFKB2, DUSP10, IL1B, MAP3K8, MAP3K5                                                                                           |
| Small cell lung cancer                                     | 3.09E-04 | 2.50E-03 | NFKBIA, CDK6, LAMB3, ITGA2, PIK3CD, TRAF1, PTGS2, NFKB1, BIRC2, BIRC3                                                                                                                                                    |
| Influenza A                                                | 5.13E-04 | 3.86E-03 | MAP2K3, IL33, JUN, CXCL8, TMPRSS2, PIK3CD, NFKB1, ICAM1, TNFRSF10D, NFKBIA, IL6, IL1B, CCL5, CCL2                                                                                                                        |
| Osteoclast differentiation                                 | 5.22E-04 | 3.86E-03 | NFKBIA, FOSL1, TGFB2, JUN, IL1R1, IL1B, PIK3CD, TNFRSF11B, NFKB1, FOSL2, RELB, NFKB2                                                                                                                                     |
| Epstein-Barr virus infection                               | 1.13E-03 | 7.99E-03 | LYN, MAP2K3, NFKBIA, JUN, TNFAIP3, PIK3CD, CD44, NFKB1, RELB, NFKB2, ICAM1                                                                                                                                               |
| Hepatitis B                                                | 1.22E-03 | 8.16E-03 | STAT5A, NFKBIA, IL6, TGFB2, JUN, CXCL8, CDK6, PTK2B, PIK3CD, MMP9, NFKB1, CREB5                                                                                                                                          |
| Salmonella infection                                       | 1.25E-03 | 8.16E-03 | IL6, JUN, CXCL8, CSF2, IL1B, CXCL1, CXCL3, CXCL2, NFKB1                                                                                                                                                                  |
| Toll-like receptor signaling pathway                       | 1.55E-03 | 9.53E-03 | MAP2K3, NFKBIA, IL6, JUN, CXCL8, CCL5, IL1B, PIK3CD, MAP3K8, NFKB1                                                                                                                                                       |
| Epithelial cell signaling in Helicobacter pylori infection | 1.57E-03 | 9.53E-03 | LYN, NFKBIA, JUN, CXCL8, CCL5, EGFR, NFKB1, HBEGF                                                                                                                                                                        |
| Leishmaniasis                                              | 2.20E-03 | 1.29E-02 | NFKBIA, C3, TGFB2, JUN, ITGAM, IL1B, PTGS2, NFKB1                                                                                                                                                                        |
| Pertussis                                                  | 3.02E-03 | 1.71E-02 | C3, CXCL6, IL6, JUN, ITGAM, CXCL8, IL1B, NFKB1                                                                                                                                                                           |
| HIF-1 signaling pathway                                    | 3.16E-03 | 1.74E-02 | IL6, FLT1, TFRC, SERPINE1, PIK3CD, IL6R, EGFR, NFKB1, HK2                                                                                                                                                                |
| Jak-STAT signaling pathway                                 | 4.06E-03 | 2.16E-02 | STAT5A, IL11, CSF3, IL6, CSF2, IL4R, IL24, LIF, PIK3CD, IL7R, IL6R                                                                                                                                                       |
| ECM-receptor interaction                                   | 6.87E-03 | 3.54E-02 | RELN, SDC4, LAMB3, ITGA2, TNC, ITGB8, THBS2, CD44                                                                                                                                                                        |
| Complement and coagulation cascades                        | 8.36E-03 | 4.18E-02 | C3, SERPINA1, SERPINE1, BDKRB2, PLAUR, BDKRB1, PLAT                                                                                                                                                                      |
| African trypanosomiasis                                    | 9.68E-03 | 4.70E-02 | IL6, VCAM1, IL1B, F2RL1, ICAM1                                                                                                                                                                                           |
| Chronic myeloid leukemia                                   | 1.02E-02 | 4.83E-02 | STAT5A, NFKBIA, TGFB2, CDK6, SHC3, PIK3CD, NFKB1                                                                                                                                                                         |
| Cell adhesion molecules (CAMs)                             | 1.08E-02 | 4.94E-02 | ITGAM, VCAM1, ALCAM, SDC4, CADM1, ITGB8, PDCD1LG2, CLDN1, ICOSLG, ICAM1                                                                                                                                                  |

**Supplementary table 12. KEGG pathway analysis for significant URGs with and without IL-1 $\beta$  stimulation in Ad-EGFP transduced samples.**

| Pathway                                                  | P value  | FDR      | Enriched genes                                                                                                                                                     |
|----------------------------------------------------------|----------|----------|--------------------------------------------------------------------------------------------------------------------------------------------------------------------|
| TNF signaling pathway                                    | 5.43E-18 | 8.85E-16 | MAP2K3, JUN, VCAM1, JAG1, CSF2, CCL20, MMP3, LIF, PIK3CD, TNFAIP3, CXCL1, CFLAR, TRAF1, CXCL3, PTGS2, CXCL2, MMP9, ICAM1, IL6, IL1B, CCL2, BIRC2, BIRC3, CREB5     |
| Cytokine-cytokine receptor interaction                   | 6.64E-11 | 5.41E-09 | CXCL6, CSF3, CCL11, CSF2, CXCL8, IL24, CXCL1, CXCL3, CXCL2, CCL8, CCL7, CCL2, IL6R, IL11, TGFB2, IL4R, CCL20, IL1R1, TNFSF15, TNFRSF9, LIF, INHBA, IL6, IL1B, IL7R |
| Proteoglycans in cancer                                  | 1.51E-08 | 8.19E-07 | TGFB2, WNT5B, SDC4, WNT7B, ITGA2, CAV1, WNT5A, TWIST2, PLAUR, FZD8, PIK3CD, WNT9A, FGF2, THBS1, MMP9, EGFR, PLAU, TIMP3, CD44, HBEGF                               |
| NF-kappa B signaling pathway                             | 1.40E-07 | 5.19E-06 | VCAM1, CXCL8, BCL2A1, IL1R1, TNFAIP3, CFLAR, TRAF1, PTGS2, ICAM1, PLAU, IL1B, BIRC2, BIRC3                                                                         |
| Rheumatoid arthritis                                     | 1.59E-07 | 5.19E-06 | CXCL6, IL11, TGFB2, JUN, FLT1, CXCL8, CSF2, CCL20, MMP3, ICAM1, IL6, IL1B, CCL2                                                                                    |
| Malaria                                                  | 4.48E-07 | 1.22E-05 | CSF3, IL6, TGFB2, VCAM1, CXCL8, IL1B, CCL2, THBS2, THBS1, ICAM1                                                                                                    |
| Hematopoietic cell lineage                               | 1.16E-06 | 2.71E-05 | IL11, CSF3, IL6, CSF2, IL4R, TFRC, IL1R1, IL1B, ITGA2, IL7R, IL6R, CD44                                                                                            |
| Pathways in cancer                                       | 3.16E-06 | 6.43E-05 | PTGER4, TGFB2, JUN, CXCL8, WNT5B, LAMB3, WNT7B, ITGA2, WNT5A, VEGFC, FZD8, PIK3CD, TRAF1, WNT9A, PTGS2, ETS1, FGF2, MMP9, EGFR, IL6, BDKRB1, BIRC2, BIRC3, NKX3-1  |
| NOD-like receptor signaling pathway                      | 1.42E-05 | 2.58E-04 | IL6, CXCL8, IL1B, TNFAIP3, CCL2, CXCL1, CXCL2, BIRC2, BIRC3                                                                                                        |
| Transcriptional misregulation in cancer                  | 2.92E-05 | 4.76E-04 | FLT1, CXCL8, CSF2, BCL2A1, MMP3, TMPRSS2, HMG2, TRAF1, MMP9, IL6, MEIS1, PLAU, ID2, NFKBIZ                                                                         |
| Focal adhesion                                           | 6.46E-05 | 9.58E-04 | SHC4, JUN, FLT1, LAMB3, ITGA2, CAV1, TNC, VEGFC, PIK3CD, THBS2, THBS1, EGFR, ITGB8, BIRC2, BIRC3                                                                   |
| HTLV-I infection                                         | 1.73E-04 | 2.34E-03 | TGFB2, JUN, VCAM1, CSF2, WNT5B, IL1R1, WNT7B, WNT5A, FZD8, PIK3CD, WNT9A, ETS1, ETS2, ICAM1, FOXL1, IL6                                                            |
| Chagas disease (American trypanosomiasis)                | 2.34E-04 | 2.93E-03 | C3, IL6, TGFB2, JUN, CXCL8, IL1B, SERPINE1, CCL2, PIK3CD, CFLAR                                                                                                    |
| Chemokine signaling pathway                              | 3.56E-04 | 4.15E-03 | SHC4, CXCL6, CCL11, CXCL8, CCL20, PIK3CD, CXCL1, CXCL3, CXCL2, CCL8, CCL7, PTK2B, CCL2                                                                             |
| Signaling pathways regulating pluripotency of stem cells | 5.04E-04 | 5.47E-03 | MEIS1, WNT5B, WNT7B, ID2, WNT5A, LIF, FZD8, PIK3CD, INHBA, WNT9A, FGF2                                                                                             |
| PI3K-Akt signaling pathway                               | 5.45E-04 | 5.55E-03 | CSF3, IL4R, FLT1, LAMB3, ITGA2, TNC, VEGFC, PIK3CD, THBS2, FGF2, THBS1, EGFR, IL6, ITGB8, SGK1, IL7R, IL6R, CREB5                                                  |
| Legionellosis                                            | 7.11E-04 | 6.82E-03 | C3, IL6, CXCL8, IL1B, CXCL1, CXCL3, CXCL2                                                                                                                          |
| Amoebiasis                                               | 1.30E-03 | 1.17E-02 | IL6, TGFB2, CXCL8, CSF2, SERPINB2, LAMB3, IL1R1, IL1B, PIK3CD                                                                                                      |
| Salmonella infection                                     | 1.37E-03 | 1.17E-02 | IL6, JUN, CXCL8, CSF2, IL1B, CXCL1, CXCL3, CXCL2                                                                                                                   |
| ECM-receptor interaction                                 | 1.80E-03 | 1.47E-02 | SDC4, LAMB3, ITGA2, TNC, ITGB8, THBS2, THBS1, CD44                                                                                                                 |
| Jak-STAT signaling pathway                               | 2.57E-03 | 1.91E-02 | IL11, CSF3, IL6, CSF2, IL4R, IL24, LIF, PIK3CD, IL7R, IL6R                                                                                                         |
| Complement and coagulation cascades                      | 2.58E-03 | 1.91E-02 | C3, THBD, PLAU, SERPINE1, PLAUR, BDKRB1, F3                                                                                                                        |
| HIF-1 signaling pathway                                  | 3.16E-03 | 2.24E-02 | IL6, FLT1, TFRC, SERPINE1, PIK3CD, IL6R, EGFR, HK2                                                                                                                 |
| African trypanosomiasis                                  | 4.15E-03 | 2.82E-02 | IL6, VCAM1, IL1B, F2RL1, ICAM1                                                                                                                                     |
| Small cell lung cancer                                   | 7.23E-03 | 4.72E-02 | LAMB3, ITGA2, PIK3CD, TRAF1, PTGS2, BIRC2, BIRC3                                                                                                                   |
| Cell adhesion molecules (CAMs)                           | 7.86E-03 | 4.93E-02 | CD274, CDH4, VCAM1, ALCAM, SDC4, ITGB8, PDCD1LG2, CLDN1, ICAM1                                                                                                     |

Supplementary table 13. KEGG pathway analysis for significant URGs in Ad-KLF4 versus Ad-EGFP transduced samples.

| Pathway                                            | P value  | FDR      | Enriched genes                                                                                                                                                                                                                                                                                                                                                                                                                                                                                                                                                                          |
|----------------------------------------------------|----------|----------|-----------------------------------------------------------------------------------------------------------------------------------------------------------------------------------------------------------------------------------------------------------------------------------------------------------------------------------------------------------------------------------------------------------------------------------------------------------------------------------------------------------------------------------------------------------------------------------------|
| Rap1 signaling pathway                             | 1.09E-06 | 2.66E-04 | FLT1, ITGAM, CSF1, CALML5, CALML6, FLT4, ITGA2B, ITGB2, FGF3, FGF4, CDH1, RASSF5, RAC2, PLCE1, PRKCG, MAP2K3, MAGI2, PGF, TIAM1, PLCB3, MRAS, ADCY9, RAPGEF2, PRKD2, RAPGEF5, PLCB1, PLCB2, RAPGEF3, EPHA2, SRC, PDGFB, PDGFA, EFNA5, RASGRP2, PRKCZ, RAP1GAP, GNAI2, ADCY5, PARD6B, PARD6A, DRD2, FGF22, ANGPT4, NGFR, INSR, GRIN1, VEGFA, FGF17, AFDN, EFNA3, EFNA2, LPAR5, FGF19, ID1, FGF18, KRAS, TEK, FGFR3, FGFR2, BCAR1                                                                                                                                                         |
| Endocytosis                                        | 1.37E-05 | 1.07E-03 | SH3KBP1, CLTB, WASL, AP2A2, PSD2, PSD4, KIF5A, GIT1, PSD, VPS37B, ARAP1, DNMT1, EPN1, TGFBR2, EPN2, EPN3, ACAP3, BIN1, CHMP4C, CHMP4B, STAM2, RAB7A, SRC, VPS4B, AGAP2, NEDD4L, AGAP1, ASAP2, AGAP3, PRKCZ, CYTH2, PARD6B, GRK3, PARD6A, RAB11FIP1, CYTH4, GRK5, CXCR1, CXCR2, MVB12B, MVB12A, PIP5K1C, RAB11FIP3, CYTH1, RAB11FIP4, RAB11FIP5, IQSEC2, IQSEC1, CAV2, CAV1, IQSEC3, HSPA6, AP2B1, IGF2R, RAB10, EHD1, MDM2, FOLR3, FOLR1, FGFR3, FGFR2, HSPA1B, HSPA1A                                                                                                                  |
| Calcium signaling pathway                          | 1.92E-05 | 1.07E-03 | RYR1, OXTR, CALML5, CALML6, ATP2A3, ATP2A1, MYLK3, SLC8A2, PPP3CA, BDKRB1, PLCE1, PRKCG, TNNC1, TNNC2, ITPK3, PLCB3, ADCY9, ORAI3, ITPKA, PLCB1, PLCB2, CAMK2B, CAMK2D, PTAFR, CACNA1B, CACNA1A, ADRB1, ITPR3, CACNA1C, ADRB2, CACNA1H, CACNA1G, CACNA1I, GNA15, ERBB3, HRH2, PLCG2, PTK2B, NTSR1, NOS3, ATP2B4, ATP2B2, GRIN2C, GRIN1, GRIN2D, SLC8A3, P2RX5, GNAL, P2RX1, PLCD3                                                                                                                                                                                                       |
| ECM-receptor interaction                           | 2.02E-05 | 1.07E-03 | LAMA5, TNXB, SDC4, ITGB4, COL11A1, LAMA3, COL11A2, ITGA2B, LAMC2, COMP, CHAD, ITGB8, ITGB7, LAMB3, VWF, ITGA3, ITGA2, HSPG2, GP9, COL2A1, COL1A2, COL4A2, COL5A1, COL6A2, COL4A3, COL6A1, SDC1, ITGA6, ITGA5, AGRN                                                                                                                                                                                                                                                                                                                                                                      |
| Hippo signaling pathway                            | 2.19E-05 | 1.07E-03 | CRB2, WNT2B, TCF7, LEF1, ITGB2, PRKCZ, AREG, SAV1, AMOT, WNT6, CCND3, PARD6B, RASSF1, PARD6A, WNT11, CCND2, CCND1, YWHAQ, CDH1, DVL1, WNT1, BTRC, WNT4, APC2, WNT10A, WNT3A, WNT7B, BMP8A, WNT9B, SCRIB, AXIN2, WNT9A, BMP6, FRMD1, TGFBR2, BMP4, BMP2, LATS2, PPP2R2C, PPP2R2B, ID2, ID1, PPP2R2D, TP73                                                                                                                                                                                                                                                                                |
| PI3K-Akt signaling pathway                         | 5.01E-05 | 2.01E-03 | CDKN1A, CSF3, CRTC2, FLT1, CSF1, ITGB4, FLT4, ITGA2B, LAMC2, FGF3, FGF4, COMP, CASP9, CCND3, STK11, GNGT2, CCND2, CCND1, YWHAQ, ITGB8, ITGB7, IL6R, VWF, SYK, ITGA3, ITGA2, PPP2R5B, PPP2R5A, PGF, CREB3, COL2A1, COL4A2, COL6A2, COL4A3, COL6A1, IL3RA, ITGA6, ITGA5, SGK2, EPHA2, LAMA5, PHLPP1, TNXB, ATF6B, COL11A1, COL11A2, LAMA3, PDGFB, PDGFA, FOXO3, EFNA5, RXRA, CHAD, GNG8, FGF22, ANGPT4, NGFR, LAMB3, NOS3, INSR, VEGFA, FGF17, NR4A1, EFNA3, EFNA2, COL1A2, COL5A1, PPP2R2C, LPAR5, PPP2R2B, LPAR6, FGF19, PPP2R2D, FGF18, MDM2, KRAS, TEK, PIK3AP1, FGFR3, FGFR2, BCL2L1 |
| Focal adhesion                                     | 5.75E-05 | 2.01E-03 | FLT1, ITGB4, FLT4, ITGA2B, LAMC2, MYLK3, COMP, CCND3, CCND2, CCND1, CAPN2, RAC2, ITGB8, ITGB7, PRKCG, VWF, ITGA3, ITGA2, ACTN4, PGF, VAV1, VAV2, COL2A1, COL4A2, COL6A2, COL4A3, COL6A1, ITGA6, ITGA5, LAMA5, TNXB, SRC, SHC1, COL11A1, COL11A2, PXN, LAMA3, PDGFB, PDGFA, CHAD, PAK6, FLNB, FLNC, PAK4, LAMB3, CAV2, CAV1, VEGFA, MYLPP, DIAPH1, COL1A2, COL5A1, PARVG, BCAR1                                                                                                                                                                                                          |
| MAPK signaling pathway                             | 6.70E-05 | 2.05E-03 | FGF3, FGF4, PPP3CA, RPS6KA5, RPS6KA2, RPS6KA1, RAC2, MAP3K8, MAP4K1, DUSP4, PRKCG, MAP2K3, DUSP5, DUSP2, PLA2G4F, PLA2G4D, PLA2G4C, CACNA2D3, RRAS2, CACNA2D2, DUSP8, DUSP9, MAPK8IP3, TGFBR2, DUSP7, CACNB1, CACNB4, MRAS, DDIT3, RAPGEF2, CACNA1B, PDGFB, CACNA1A, PDGFA, CACNA1C, RASGRP2, CACNA1H, CACNA1G, CACNA1I, MAPK7, MKNK2, FLNB, FLNC, FGF22, GADD45B, GADD45A, HSPA6, NFATC1, GADD45G, FGF17, NR4A1, TAOK3, FGF19, FGF18, FAS, KRAS, PTPN7, LAMTOR3, FGFR3, MAP3K11, FGFR2, HSPA1B, HSPA1A                                                                                 |
| p53 signaling pathway                              | 8.57E-05 | 2.20E-03 | CDKN1A, GADD45B, CD82, APAF1, GADD45A, PPM1D, SERPINB5, GADD45G, DDB2, CASP9, CCND3, CCND2, CCND1, RRM2B, ZMAT3, PERP, SESN1, SESN2, ADGRB1, MDM2, FAS, PMAIP1, SFN, TP73                                                                                                                                                                                                                                                                                                                                                                                                               |
| Phosphatidylinositol signaling system              | 8.99E-05 | 2.20E-03 | CD51, CALML5, CALML6, INPP1, DGKA, ITPR3, PIK3C2B, INPP5B, INPP5A, PIP5K1, IMPA2, INPP5D, INPP5E, PLCG2, INPP5K, PLCE1, PIP4K2C, PIP5K1C, IP6K3, PRKCG, ITPK1, DGK2, INPP4A, ITPKC, PLCB3, SYNJ1, ITPKA, PLCD3, PLCB1, PLCB2, DGKH                                                                                                                                                                                                                                                                                                                                                      |
| Regulation of actin cytoskeleton                   | 9.95E-05 | 2.22E-03 | CYFIP2, CYFIP1, ITGAM, ITGB4, ITGA2B, ITGB2, WASL, MYLK3, FGF3, FGF4, ITGAX, RAC2, BDKRB1, ITGB8, ITGB7, PIP4K2C, GIT1, APC2, ITGA3, ITGA2, RRAS2, ACTN4, VAV1, VAV2, TIAM1, MRAS, ARHGEF4, ARHGEF1, ITGA6, ITGA5, EZR, SRC, PXN, PDGFB, PDGFA, FGD1, SLC9A1, PAK6, PIP5K1C, FGF22, PAK4, GSN, SSH2, BAIAP2, SSH3, MYLPP, FGF17, DIAPH1, FGF19, FGF18, KRAS, FGFR3, FGFR2, BCAR1                                                                                                                                                                                                        |
| Axon guidance                                      | 2.52E-04 | 5.15E-03 | SEMA7A, SEMA3B, NTN4, SEMA3G, SEMA3F, EFNA5, GNAI2, EFNB2, PPP3CA, EFNB1, ABLIM1, ABLIM2, ABLIM3, PLXNA2, RAC2, SLIT1, PAK6, SLIT3, SRGAP3, EPHB3, PAK4, NTNG2, SEMA4D, UNC5B, SEMA4B, NFATC2, SEMA4G, RHOD, NFATC4, EFNA3, EFNA2, PLXNB2, KRAS, PLXNB1, NGEF, EPHA2                                                                                                                                                                                                                                                                                                                    |
| Proteoglycans in cancer                            | 3.84E-04 | 7.24E-03 | CDKN1A, WNT2B, CCND1, CTSL, TIMP3, PLCE1, PRKCG, MMP2, ITGA2, WNT9B, PLAUR, RRAS2, FRS2, WNT9A, HSPG2, MMP9, TIAM1, MRAS, ARHGEF1, ITGA5, EZR, HBEGF, CAMK2B, CAMK2D, SDC4, SRC, PXN, ITPR3, SLC9A1, WNT6, WNT11, ERBB3, GPC1, PLCG2, FLNB, FLNC, WNT1, WNT4, WNT10A, WNT3A, CAV2, WNT7B, CAV1, VEGFA, MDM2, FAS, SDC1, KRAS, PTPN6, HPSE                                                                                                                                                                                                                                               |
| Oxytocin signaling pathway                         | 4.25E-04 | 7.44E-03 | CAMK2B, RYR1, CDKN1A, OXTR, CAMK2D, CALML5, NPR1, CALML6, SRC, OXT, ITPR3, CACNA1C, MYLK3, GNAI2, ADCY5, PPP3CA, RGS2, MAPK7, CCND1, PRKCG, PLA2G4F, CAMK1D, PLA2G4D, NOS3, KCNJ12, PLA2G4C, KCNJ14, CACNA2D3, NFATC2, CACNA2D2, NFATC1, PRKAB1, NFATC4, CACNB1, PLCB3, CACNB4, ADCY9, KRAS, PLCB1, PLCB2                                                                                                                                                                                                                                                                               |
| Inositol phosphate metabolism                      | 6.30E-04 | 1.01E-02 | ISYNA1, INPP1, ITPK1, PIK3C2B, INPP4A, INPP5B, ITPKC, PLCB3, INPP5A, SYNJ1, IMPA2, INPP5D, INPP5E, ITPKA, PLCG2, INPP5K, PLCE1, PIP5K1C, PLCH2, PIP4K2C, PLCD3, PLCB1, PLCB2                                                                                                                                                                                                                                                                                                                                                                                                            |
| Arrhythmic right ventricular cardiomyopathy (ARVC) | 7.02E-04 | 1.01E-02 | DSP, JUP, ITGB4, ITGA3, ITGA2, LEF1, TCF7, ITGA2B, CACNA2D3, CACNA1C, CACNB1, GJA1, DES, CACNB4, SGCA, LMNA, ITGB8, ITGA6, ITGB7, ITGA5, SGCG                                                                                                                                                                                                                                                                                                                                                                                                                                           |
| Glutamatergic synapse                              | 7.16E-04 | 1.01E-02 | GLS2, GRIK5, SLC1A2, CACNA1A, ITPR3, CACNA1C, SLC1A6, SLC1A7, GNAI2, ADCY5, PPP3CA, GRM2, GRK3, GRM4, GNGT2, GNG8, SLC17A7, SLC38A3, PRKCG, PLA2G4F, PLA2G4D, PLA2G4C, GRIN2C, GRIN1, GRIN2D, PLCB3, GRIN3B, ADCY9, PLCB1, PLCB2, SHANK3, SHANK2                                                                                                                                                                                                                                                                                                                                        |
| Basal cell carcinoma                               | 7.40E-04 | 1.01E-02 | APC2, WNT10A, WNT2B, WNT3A, WNT7B, LEF1, TCF7, WNT9B, AXIN2, WNT9A, GLI1, BMP4, WNT6, SHH, BMP2, WNT11, DVL1, WNT1, WNT4                                                                                                                                                                                                                                                                                                                                                                                                                                                                |
| Amphetamine addiction                              | 1.49E-03 | 1.92E-02 | PRKCG, CAMK2B, CAMK2D, ATF6B, CALML5, MAOA, CALML6, CACNA1C, GRIN2C, SLC6A3, ADCY5, GRIN1, GRIN2D, CREB3, PPP3CA, ARC, GRIN3B, TH, PPP1R1B, FOSB, STX1A                                                                                                                                                                                                                                                                                                                                                                                                                                 |
| Aldosterone synthesis and secretion                | 1.81E-03 | 2.14E-02 | PRKCG, CAMK2B, CAMK2D, DAGLA, CAMK1D, ATF6B, CALML5, CALML6, NPR1, PDE2A, ITPR3, CACNA1C, CACNA1H, ADCY5, CACNA1G, NR4A2, CACNA1I, CREB3, NR4A1, PLCB3, ADCY9, PRKD2, PLCB1, PLCB2                                                                                                                                                                                                                                                                                                                                                                                                      |
| Cocaine addiction                                  | 1.84E-03 | 2.14E-02 | GPSM1, ATF6B, MAOA, GRIN2C, SLC6A3, ADCY5, GNAI2, GRIN1, GRIN2D, GRM2, CREB3, GRIN3B, TH, PPP1R1B, FOSB, DRD2, RGS9                                                                                                                                                                                                                                                                                                                                                                                                                                                                     |
| Ras signaling pathway                              | 2.15E-03 | 2.39E-02 | FLT1, CSF1, CALML5, CALML6, FLT4, FGF3, FGF4, RASSF1, GNGT2, SYNAP1, RASSF5, RAC2, PLCE1, PRKCG, PLA2G4F, PLA2G4D, PLA2G4C, RRAS2, PGF, TIAM1, MRAS, RIN1, RAPGEF5, EPHA2, SHC1, PDGFB, PDGFA, PLA2G3, RASAL1, EFNA5, RASGRP2, PLCG2, GNG8, PAK6, FGF22, PAK4, ANGPT4, NGFR, INSR, GRIN1, VEGFA, FGF17, AFDN, EFNA3, EFNA2, FGF19, FGF18, KRAS, TEK, FGFR3, FGFR2, BCL2L1                                                                                                                                                                                                               |
| cGMP-PKG signaling pathway                         | 2.39E-03 | 2.53E-02 | CALML5, ATF6B, NPR1, CALML6, ATP2A3, ATP1A3, IRS2, ADRB1, ITPR3, CACNA1C, ADRB2, MYLK3, SLC8A2, GNAI2, ADCY5, PPP3CA, RGS2, CNGA1, KCNB4, MEF2D, MEF2A, NOS3, INSR, PDE2A, ATP2B4, NFATC2, NFATC1, ATP2B2, ADRA2C, NFATC4, SLC8A3, CREB3, PLCB3, ADCY9, PDE5A, PLCB1, PLCB2, CNGB1                                                                                                                                                                                                                                                                                                      |
| Adrenergic signaling in cardiomyocytes             | 2.60E-03 | 2.53E-02 | CAMK2B, CAMK2D, CALML5, ATF6B, CALML6, ATP1A3, ADRB1, CACNA1C, ADRB2, GNAI2, SLC9A1, ADCY5, RPS6KA5, TNNI3, SCN5A, TNNC1, PPP2R5B, ATP2B4, CACNA2D3, PPP2R5A, CACNA2D2, ATP2B2, CACNB1, CREB3, PLCB3, CACNB4, ADCY9, PPP2R2C, PPP2R2B, PPP2R2D, PLCB1, PLCB2, MYH6, RAPGEF3, MYH7                                                                                                                                                                                                                                                                                                       |
| Protein digestion and absorption                   | 2.63E-03 | 2.53E-02 | KCNK5, COL17A1, COL13A1, COL11A1, ELN, COL11A2, ATP1A3, SLC1A5, SLC8A2, KCNN4, PRSS3, SLC8A3, SLC9A3, COL2A1, SLC7A7, COL1A2, COL4A2, SLC7A8, COL5A1, SLC7A9, COL6A2, COL4A3, COL6A1, COL9A3, COL9A2                                                                                                                                                                                                                                                                                                                                                                                    |
| Dopaminergic synapse                               | 2.68E-03 | 2.53E-02 | CAMK2B, CAMK2D, CALML5, ATF6B, MAOA, CALML6, CACNA1B, CACNA1A, ITPR3, CACNA1C, SLC6A3, GNAI2, ARNTL, ADCY5, PPP3CA, GNGT2, KIF5A, GNG8, DRD2, PRKCG, PPP2R5B, PPP2R5A, CREB3, PLCB3, GNAL, CALY, TH, PPP2R2C, PPP2R2B, PPP2R2D, PPP1R1B, PLCB1, PLCB2                                                                                                                                                                                                                                                                                                                                   |
| Platelet activation                                | 3.48E-03 | 3.15E-02 | SRC, COL11A1, COL11A2, ITGA2B, ITPR3, RASGRP2, PRKCZ, MYLK3, GNAI2, PTGS1, ADCY5, PLCG2, PLA2G4F, PTGIR, SYK, VWF, PLA2G4D, NOS3, ITGA2, PLA2G4C, VAMP8, GP9, PLCB3, COL2A1, FCG2R2A, ADCY9, COL1A2, COL5A1, P2RX1, ARHGEF1, PLCB1, PLCB2, FERMT3                                                                                                                                                                                                                                                                                                                                       |

|                                      |          |          |                                                                                                                                                                                                                                                                                                                                                                                                                                                                                                                                                              |
|--------------------------------------|----------|----------|--------------------------------------------------------------------------------------------------------------------------------------------------------------------------------------------------------------------------------------------------------------------------------------------------------------------------------------------------------------------------------------------------------------------------------------------------------------------------------------------------------------------------------------------------------------|
| Melanogenesis                        | 3.68E-03 | 3.22E-02 | CAMK2B, CAMK2D, WNT2B, CALML5, CALML6, TCF7, LEF1, GNAI2, ADCY5, WNT6, WNT11, DVL1, WNT1, WNT4, PRKCG, WNT10A, WNT3A, WNT7B, WNT9B, WNT9A, CREB3, PLCB3, ADCY9, MC1R, KRAS, PLCB1, PLCB2                                                                                                                                                                                                                                                                                                                                                                     |
| Amoebiasis                           | 4.23E-03 | 3.57E-02 | LAMA5, CSF2, ITGAM, COL11A1, LAMA3, COL11A2, ITGB2, LAMC2, GNA15, MUC2, PRKCG, SERPINB3, SERPINB1, SERPINB2, LAMB3, ACTN4, SERPINB6, PLCB3, COL2A1, GNAL, COL1A2, COL4A2, COL5A1, COL4A3, PLCB1, RAB7B, PLCB2, RAB7A                                                                                                                                                                                                                                                                                                                                         |
| Wnt signaling pathway                | 4.91E-03 | 4.00E-02 | CAMK2B, CAMK2D, WNT2B, TCF7, LEF1, PPP3CA, WNT6, CCND3, PORCN, WNT11, CCND2, CCND1, DVL1, RAC2, SOST, WNT1, BTRC, WNT4, PRKCG, APC2, WNT10A, WNT3A, WNT7B, WNT9B, NFATC2, NFATC1, AXIN2, WNT9A, NFATC4, FOSL1, PLCB3, DAAM1, PLCB1, PLCB2                                                                                                                                                                                                                                                                                                                    |
| Pathways in cancer                   | 5.07E-03 | 4.00E-02 | RET, CDKN1A, WNT2B, ITGA2B, LAMC2, GLI1, FGF3, FGF4, CASP9, RASSF1, SHH, GNGT2, CCND1, CDH1, RASSF5, RAC2, BDKRB1, APC2, PRKCG, DAPK1, ITGA3, MMP2, ITGA2, NCOA4, WNT9B, WNT9A, AXIN2, MMP9, PGF, TGFBR2, BCR, PLCB3, ADCY9, COL4A2, COL4A3, RARA, ARHGEF1, ITGA6, PLCB1, PLCB2, CEBPA, LAMA5, TCF7, LAMA3, LEF1, PDGFB, PDGFA, RASGRP2, CSF2RA, FOXO1, GNAI2, ADCY5, WNT6, WNT11, RXRA, DVL1, PLCG2, GNG8, WNT1, FGF22, WNT4, WNT10A, JUP, LAMB3, WNT3A, WNT7B, VEGFA, BMP4, FGF17, BMP2, LPAR5, LPAR6, FGF19, FGF18, MDM2, FAS, KRAS, FGFR3, FGFR2, BCL2L1 |
| Hypertrophic cardiomyopathy (HCM)    | 5.57E-03 | 4.27E-02 | MYBPC3, ACE, ITGB4, ITGA3, ITGA2, TNNC1, ITGA2B, CACNA2D3, CACNA2D2, CACNA1C, PRKAB1, CACNB1, DES, CACNB4, SGCA, LMNA, ITGB8, TNNI3, ITGA6, ITGB7, ITGA5, SGCG                                                                                                                                                                                                                                                                                                                                                                                               |
| Bladder cancer                       | 6.35E-03 | 4.71E-02 | CDKN1A, DAPK1, SRC, MMP2, MMP9, VEGFA, RASSF1, RPS6KA5, CCND1, CDH1, MDM2, KRAS, FGFR3, HBEGF                                                                                                                                                                                                                                                                                                                                                                                                                                                                |
| Dilated cardiomyopathy               | 6.58E-03 | 4.74E-02 | MYBPC3, ITGB4, ITGA3, ITGA2, TNNC1, ITGA2B, CACNA2D3, CACNA2D2, ADRB1, CACNA1C, ADCY5, CACNB1, DES, CACNB4, ADCY9, SGCA, LMNA, ITGB8, TNNI3, ITGA6, ITGB7, ITGA5, SGCG                                                                                                                                                                                                                                                                                                                                                                                       |
| Leukocyte transendothelial migration | 7.07E-03 | 4.95E-02 | ITGAM, NCF2, PXN, ITGB2, F11R, CLDN1, GNAI2, ICAM1, RASSF5, PLCG2, RAC2, PTK2B, JAM3, PRKCG, MMP2, ACTN4, MMP9, VAV1, VAV2, MYLPP, AFDN, CLDN5, CLDN4, CLDN7, PECAM1, ESAM, EZR, BCAR1, RAPGEF3                                                                                                                                                                                                                                                                                                                                                              |



Supplementary table 14. KEGG pathway analysis for significant DRGs in Ad-KLF4 versus Ad-EGFP transduced samples.

| Pathway                           | P value  | FDR      | Enriched genes                                                                                                                                                                                                                                                                                                                                                                                                                                                                                                                                            |
|-----------------------------------|----------|----------|-----------------------------------------------------------------------------------------------------------------------------------------------------------------------------------------------------------------------------------------------------------------------------------------------------------------------------------------------------------------------------------------------------------------------------------------------------------------------------------------------------------------------------------------------------------|
| Ribosome                          | 7.96E-40 | 2.20E-37 | RPL5, RPL30, RPL3, RPL32, RPL31, RPL34, RPLP1, RPLP0, MRPS12, RPL10A, RPL9, RPL6, MRPL33, RPL7, RPS4X, RPS14, MRPL3, RPL7A, RPS16, MRPL1, RPL18A, RPS18, RPL35, RPL38, RPL37, RPS11, RPL39, RPS10, RPS13, RPS12, RPS9, RPL21, RPS7, RPS8, RPL23, RPS5, RPL22, RPS6, RPL13A, RPS3A, RPSA, RPL37A, RPL24, RPL27, RPL26, RPL29, RPL12, MRPL19, RPL11, MRPL17, MRPL15, MRPL12, MRPL11, RPS15A, RPS3, RPL14, RPL13, RPS2, RPL15, RPS27A, RPL18, RPL41, RPL35A, RPL23A, MRPL24, MRPL22, RPS26, RPS25, RPS28, RPS27, RPS29, RPL27A, RPL22L1, RPS21, RPS24, RPS23 |
| Ribosome biogenesis in eukaryotes | 1.24E-05 | 1.71E-03 | NOP56, UTP15, POP5, NOP58, WDR36, POP7, NXT1, POP1, WDR3, HEATR1, WDR75, NAT10, SPATA5, PWP2, GNL3, RCL1, FBL, EMG1, DKC1, NHP2, DROSHA, RIOK1, RAN, MDN1                                                                                                                                                                                                                                                                                                                                                                                                 |
| Purine metabolism                 | 3.61E-04 | 3.32E-02 | PDE1C, PRIM1, PRUNE1, ADK, AK2, AK4, PFAS, ZNRD1, PPAT, POLD1, TWISTNB, PDE4A, ENPP1, POLR2G, NUDT16, ADSL, PNPT1, POLR3GL, PDE4D, AMPD2, NME4, PAICS, NME1, APRT, POLE4, NME7, IMPDH2, POLR3E, POLR1C, POLR1E, POLR3G, POLR3H, HPRT1, GART                                                                                                                                                                                                                                                                                                               |

**Supplementary table 15. KEGG pathway analysis for significant URGs in Ad-KLF4 versus Ad-EGFP transduced samples on IL-1 $\beta$  stimulation.**

| Pathway                                                | P value  | FDR      | Enriched genes                                                                                                                                                                                                                                                                                                                                                                                                                                                                                                                                                                                               |
|--------------------------------------------------------|----------|----------|--------------------------------------------------------------------------------------------------------------------------------------------------------------------------------------------------------------------------------------------------------------------------------------------------------------------------------------------------------------------------------------------------------------------------------------------------------------------------------------------------------------------------------------------------------------------------------------------------------------|
| Rap1 signaling pathway                                 | 1.80E-06 | 4.59E-04 | FLT1, ITGAM, CSF1, CALML5, CALML6, FLT4, ITGA2B, ITGB2, SIPA1L2, ITGAL, FGF3, FGF4, FGF7, CDH1, RASSF5, RAC2, PLCE1, PRKCG, MAP2K3, PGF, TIAM1, PLCB3, MRAS, ABCY9, PRKD2, TLN2, PLCB1, PLCB2, RAPGEF3, EPHA2, RAPGEF4, RGS14, SRC, PDGFB, PDGFA, PARD6G, LPAR3, EFNA5, RASGRP2, PRKCC, RAP1GAP, GNAI2, ADCY5, PARD6A, DRD2, RALGDS, FGF22, VASP, ANGPT4, NGFR, GRIN1, MAPK13, EFNA1, FGF17, AFDN, EFNA3, EFNA2, LPAR5, FGF19, ID1, FGF18, TEK, FGFR3, FGFR2                                                                                                                                                 |
| Endocytosis                                            | 7.59E-06 | 9.68E-04 | CLTB, ARPC5L, PSD2, PIP5K1L, PSD4, KIF5A, LDLRAP1, GIT1, PSD, SH3GLB2, VPS37D, VPS37B, ARAP1, HLA-F, DNMI1, EPN1, DNMI2, EPN2, EPN3, ACAP3, ACAP1, BIN1, TRAF6, CHMP4C, CHMP4B, STAM2, SRC, VPS4B, ASAP3, AGAP2, CXCR4, PARD6G, ASAP2, AGAP3, PRKCC, PLD2, CYTH2, GRK3, PARD6A, RAB11FIP1, CYTH4, GRK5, CXCR1, CXCR2, MVB12B, MVB12A, PIP5K1C, RAB11FIP3, CYTH1, RAB11FIP4, RAB11FIP5, RAB4A, IQSEC2, IQSEC1, IQSEC3, HSPA6, AP2B1, EHD1, IL2RB, CHMP2B, MDM2, CHMP2A, FOLR3, FOLR2, SMAP1, FOLR1, FGFR3, FGFR2, HSPA1A                                                                                      |
| Lysosome                                               | 2.86E-05 | 1.75E-03 | IDUA, CLTB, CTSW, ABCB9, CTSV, NAGPA, CTSS, LAPTM4A, GM2A, LAMP1, CTSL, LAMP3, SMPD1, CTSK, PSAP, SLC17A5, CTSB, ACP5, ACP2, AP1S3, CTSE, CTSD, ATP6V0A1, ABCA2, ARSA, PSAPL1, ATP6AP1, AP1B1, AP3D1, LAPTM5, CTNS, MCOLN1, PLA2G15, GNPTG, NPC1, NPC2, TPP1, DNCE2, PPT2, ATP6V0D1                                                                                                                                                                                                                                                                                                                          |
| Hippo signaling pathway                                | 2.90E-05 | 1.75E-03 | CRB2, WNT2B, TCF7, LEF1, ITGB2, PARD6G, PRKCC, AREG, SAV1, AMOT, GLI2, WNT6, CCND3, PARD6A, WNT11, CCND2, CCND1, YWHAQ, CDH1, WNT1, BTRC, WNT4, TEAD3, FZD1, APC2, WNT10A, WNT3A, WNT7B, BMP8A, WNT9B, SCRB, AXIN2, WNT9A, WNT16, BMP6, FRMD1, BMP4, BMP2, LPTC2, DLG3, PPP2R2C, PPP2R2B, ID2, ID1, PPP2R2D, LLGL2, TP73                                                                                                                                                                                                                                                                                     |
| Calcium signaling pathway                              | 3.82E-05 | 1.75E-03 | RYR1, MYLK2, OXTR, CALML5, CALML6, ATP2A3, ATP2A1, MYLK3, SLC8A2, PPP3CA, PLCE1, PRKCG, TNNC1, TNNC2, ITPKB, ITPKC, PLCB3, ADCY9, STIM1, ORAI3, PLCB1, PLCB2, CAMK2B, CAMK2D, CAMK2A, PTAFR, CACNA1B, CACNA1A, ADRB1, ITPR3, CACNA1C, ADRB2, CACNA1H, CACNA1G, CACNA1I, GNA15, ERBB3, HRH2, ERBB2, PLCG2, PTK2B, NTSR1, NOS3, ATP2B4, ATP2B2, GRIN2C, GRIN1, GRIN2D, SLC8A3, P2RX5, P2RX1, PLCD3, PLCD1                                                                                                                                                                                                      |
| Axon guidance                                          | 4.12E-05 | 1.75E-03 | SEMA5A, ROBO3, SEMA7A, SEMA3B, NTN4, SEMA3G, CXCR4, SEMA3F, EFNA5, GNAI2, PPP3CA, EFNB1, ABLIM1, ABLIM2, DPYSL2, PLXNA2, RAC2, SLIT1, PAK6, SLIT3, PLXNC1, SRGAP3, EPHB3, PAK4, SEMA6C, NTNG2, SEMA4D, UNC5B, EPHA8, SEMA4B, NFATC2, SEMA4G, RHOD, NFATC4, EFNA1, EFNA3, EFNA2, PLXNB2, PLXNB1, NGEF, EPHA2                                                                                                                                                                                                                                                                                                  |
| Wnt signaling pathway                                  | 1.44E-04 | 4.70E-03 | CAMK2B, CAMK2D, WNT2B, TCF7, LEF1, CAMK2A, PSEN1, PRICKLE1, NKD2, PPP3CA, WNT6, CCND3, PORCN, WNT11, CCND2, CCND1, RAC2, SOST, WNT1, BTRC, WNT4, FZD1, PRKCG, APC2, WNT10A, WNT3A, WNT7B, CTNINBIP1, WNT9B, NFATC2, NFATC1, AXIN2, WNT9A, WNT16, NFATC4, PLCB3, VANGL2, DAAM1, DAAM2, PLCB1, PLCB2, PPARD                                                                                                                                                                                                                                                                                                    |
| MAPK signaling pathway                                 | 1.47E-04 | 4.70E-03 | HSPB1, FGF3, FGF4, PPP3CA, RPS6KA6, FGF7, RPS6KA5, RPS6KA2, RPS6KA1, RAC2, MAP3K8, MAP3K6, DUSP4, PRKCG, MAP2K3, DUSP5, MAP4K2, DUSP2, PLA2G4F, PLA2G4C, CACNA2D3, CACNA2D2, DUSP8, MAPK8IP2, DUSP9, MAPK8IP3, DUSP7, CACNB1, CACNB4, MRAS, MAPKAPK3, TRAF6, DDIT3, MAPT, CACNA1B, PDGFB, CACNA1A, PDGFA, CACNA1C, RASGRP2, RASGRP1, CACNA1H, CACNA1G, CACNA1I, CACNG8, MAPK7, NTF3, MKNK2, FLNB, FLNC, FGF22, GADD45B, HSPA6, NFATC1, GADD45G, MAPK13, FGF17, NR4A1, FGF19, FGF18, FAS, PTPN7, LAMTOR3, FGFR3, MAP3K11, FGFR2, HSPA1A                                                                       |
| PI3K-Akt signaling pathway                             | 2.54E-04 | 7.19E-03 | CDKN1A, CRCC2, FLT1, CSF1, EPO, ITGB4, FLT4, ITGA2B, LAMC2, FGF3, FGF4, COMP, CASP9, CCND3, STK11, FGF7, GNGT2, CCND2, CCND1, CREB3L3, YWHAQ, ITGB7, IL6R, VWF, SYK, ITGA2, PPP2R5B, PPP2R5A, PGF, CREB3, COL2A1, COL4A3, COL6A1, IL3RA, MTCP1, ITGA7, ITGA6, SGK3, ITGA5, SGK2, EPHA2, LAMA5, PHLPP1, TNXB, ATF6B, PKN3, COL11A2, LAMA3, PDGFB, PDGFA, LPAR3, FOXO3, EFNA5, RXRA, GNG7, CHAD, GNG8, PCK1, FGF22, ANGPT4, NGFR, LAMB3, NOS3, EFNA1, FGF17, NR4A1, EFNA3, EFNA2, COL1A2, COL5A1, PPP2R2C, LPAR5, PPP2R2B, LPAR6, GNB2, FGF19, PPP2R2D, IL2RB, FGF18, MDM2, TEK, PIK3AP1, FGFR3, FGFR2, BCL2L1 |
| Basal cell carcinoma                                   | 3.35E-04 | 8.55E-03 | FZD1, APC2, WNT10A, WNT2B, WNT3A, WNT7B, LEF1, TCF7, WNT9B, AXIN2, WNT9A, GLI1, WNT16, GLI2, BMP4, WNT6, SHH, BMP2, WNT11, WNT1, WNT4                                                                                                                                                                                                                                                                                                                                                                                                                                                                        |
| p53 signaling pathway                                  | 4.47E-04 | 1.04E-02 | CDKN1A, GADD45B, APAF1, IGFBP3, PPM1D, SERPINB5, GADD45G, DDB2, CASP9, PIDD1, CCND3, CCND2, SESN3, CCND1, RRM2B, ZMAT3, PERP, SESN1, SESN2, ADGRB1, MDM2, FAS, SFN, TP73                                                                                                                                                                                                                                                                                                                                                                                                                                     |
| Leukocyte transendothelial migration                   | 5.73E-04 | 1.17E-02 | ITGAM, NCF2, PXN, ITGB2, CXCR4, F11R, ITGAL, CLDN1, GNAI2, ICAM1, RASSF5, PLCG2, RAC2, PTK2B, JAM3, PRKCG, VAV3, VASP, MMP2, ACTN4, VAV1, MAPK13, VAV2, MYLPP, AFDN, CLDN5, CLDN4, OCLN, CLDN15, CLDN7, PECAM1, ESAM, EZR, RAPGEF3, RAPGEF4                                                                                                                                                                                                                                                                                                                                                                  |
| Adrenergic signaling in cardiomyocytes                 | 6.34E-04 | 1.17E-02 | CAMK2B, CAMK2D, CALML5, ATF6B, CALML6, CAMK2A, ATP1A3, ADRB1, CACNA1C, ADRB2, GNAI2, ADCY5, CACNG8, RPS6KA5, CREB3L3, TNNC1, TNNC1, PPP2R5B, ATP2B4, CACNA2D3, PPP2R5A, CACNA2D2, ATP2B2, MAPK13, CACNB1, CREB3, PLCB3, CACNB4, ADCY9, PPP2R2C, PPP1R1A, PPP2R2B, KCNQ1, PPP2R2D, PLCB1, PLCB2, MYH6, RAPGEF3, MYH7, RAPGEF4                                                                                                                                                                                                                                                                                 |
| Aldosterone synthesis and secretion                    | 6.41E-04 | 1.17E-02 | CAMK2B, CAMK2D, DAGLA, CALML5, ATF6B, NPR1, CALML6, CAMK2A, ITPR3, CACNA1C, CACNA1H, CACNA1G, ADCY5, CACNA1I, CREB3L3, PRKCG, CAMK1D, PDE2A, NR4A2, NR4A1, CREB3, PLCB3, ADCY9, PRKD2, PLCB1, PLCB2, KCNK3                                                                                                                                                                                                                                                                                                                                                                                                   |
| Glutamatergic synapse                                  | 1.03E-03 | 1.68E-02 | GLS2, GRIK5, CACNA1A, ITPR3, CACNA1C, SLC1A6, SLC1A7, GNAI2, PLD2, ADCY5, PPP3CA, GRM2, GRK3, GRM4, GNGT2, GNG7, GNG8, SLC17A7, HOMER3, SLC38A3, PRKCG, PLA2G4F, PLA2G4C, GRIN2C, GRIN1, GRIN2D, PLCB3, GRIN3B, ADCY9, GNB2, PLCB1, PLCB2, SHANK3, SHANK2                                                                                                                                                                                                                                                                                                                                                    |
| Dopaminergic synapse                                   | 1.11E-03 | 1.68E-02 | CAMK2B, CAMK2D, CALML5, ATF6B, MAOA, CALML6, CAMK2A, CACNA1B, CACNA1A, ITPR3, CACNA1C, SLC6A3, GNAI2, ARNTL, ADCY5, PPP3CA, GNGT2, CREB3L3, GNG7, KIF5A, GNG8, DRD2, PRKCG, PPP2R5B, PPP2R5A, MAPK13, CREB3, PLCB3, CALY, TH, PPP2R2C, PPP2R2B, GNB2, PPP2R2D, INPP1R1B, PLCB1, PLCB2                                                                                                                                                                                                                                                                                                                        |
| Inositol phosphate metabolism                          | 1.12E-03 | 1.68E-02 | MIOX, ISYNA1, INPP1, ITPK1, PIK3C2B, INPP5B, ITPKB, ITPKC, PLCB3, INPP5A, IMPA2, INPP5D, PIP5K1L, INPP5E, INPP5J, PLCG2, INPP5K, PLCE1, PIP5K1C, PIP4K2C, PLCD3, PLCB1, PLCB2, PLCD1                                                                                                                                                                                                                                                                                                                                                                                                                         |
| Phosphatidylinositol signaling system                  | 1.39E-03 | 1.97E-02 | CDS1, CALML5, CALML6, INPP1, DGKA, ITPR3, PIK3C2B, INPP5B, INPP5A, PIP5K1, IMPA2, INPP5D, INPP5E, PLCG2, INPP5J, INPP5K, PLCE1, PIP4K2C, PIP5K1C, IP6K3, PRKCG, ITPK1, ITPKB, ITPKC, PLCB3, DGKQ, PLCD3, PLCB1, PLCB2, PLCD1                                                                                                                                                                                                                                                                                                                                                                                 |
| Platelet activation                                    | 1.50E-03 | 2.02E-02 | MYLK2, SRC, COL11A2, ITGA2B, ITPR3, RASGRP2, RASGRP1, PRKCC, MYLK3, GNAI2, PTGS1, ADCY5, PLCG2, VASP, PLA2G4F, PTGIR, SYK, VWF, NOS3, ITGA2, PLA2G4C, MAPK13, VAMP8, GP9, PLCB3, COL2A1, FCGR2A, ADCY9, COL1A2, STIM1, COL5A1, P2RX1, ARHGEF1, TLN2, PLCB1, PLCB2, FERMT3                                                                                                                                                                                                                                                                                                                                    |
| Ras signaling pathway                                  | 1.73E-03 | 2.20E-02 | FLT1, CSF1, CALML5, CALML6, FLT4, FGF3, FGF4, FGF7, GNGT2, SYNGAP1, RASSF5, RAC2, PLCE1, PRKCG, PLA2G4F, PLA2G4C, PGF, TIAM1, MRAS, PLA2G10, RIN1, EXOC2, EPHA2, SHC1, PDGFB, PDGFA, PLA2G3, RASAL1, FOXO4, EFNA5, PLA2G6, RASGRP2, RASGRP1, PLD2, GNG7, PLCG2, GNG8, PAK6, RALGDS, FGF22, PAK4, ANGPT4, NGFR, GRIN1, EFNA1, FGF17, AFDN, EFNA3, EFNA2, GNB2, FGF19, FGF18, TEK, RGL1, FGFR3, FGFR2, BCL2L1                                                                                                                                                                                                  |
| Oxytocin signaling pathway                             | 1.85E-03 | 2.24E-02 | CAMK2B, RYR1, MYLK2, CDKN1A, OXTR, CAMK2D, CALML5, NPR1, CALML6, SRC, CAMK2A, PRKAG2, OXT, ITPR3, CACNA1C, MYLK3, GNAI2, ADCY5, PPP3CA, CACNG8, MAPK7, CCND1, PRKCG, KCNJ4, PLA2G4F, CAMK1D, NOS3, KCNJ12, PLA2G4C, CACNA2D3, NFATC2, CACNA2D2, NFATC1, PRKAB1, NFATC4, CACNB1, PLCB3, CACNB4, ADCY9, PLCB1, PLCB2                                                                                                                                                                                                                                                                                           |
| Melanogenesis                                          | 1.96E-03 | 2.28E-02 | CAMK2B, CAMK2D, WNT2B, CALML5, CALML6, TCF7, LEF1, CAMK2A, GNAI2, ADCY5, WNT6, WNT11, CREB3L3, WNT1, WNT4, FZD1, PRKCG, WNT10A, WNT3A, WNT7B, WNT9B, MITF, WNT9A, WNT16, CREB3, PLCB3, ADCY9, MC1R, PLCB1, PLCB2                                                                                                                                                                                                                                                                                                                                                                                             |
| Arrhythmogenic right ventricular cardiomyopathy (ARVC) | 2.86E-03 | 3.17E-02 | DSP, JUP, ITGB4, ITGA2, LEF1, TCF7, ITGA2B, CACNA2D3, CACNA2D2, CACNA1C, CACNB1, GJA1, CACNG8, DES, CACNB4, SGCA, LMNA, ITGA7, ITGA6, ITGB7, ITGA5, SGCG                                                                                                                                                                                                                                                                                                                                                                                                                                                     |
| Cell adhesion molecules (CAMs)                         | 4.11E-03 | 4.37E-02 | SELPLG, ITGAM, ITGB2, NRXN2, F11R, ITGAL, CLDN1, ICAM1, SPN, HLA-DMA, CDH4, CDH3, CDH1, NRCAM, MADCAM1, ITGB7, NEO1, LRRRC4B, HLA-DPA1, JAM3, NTNG2, CADM3, HLA-F, CLDN5, NFASC, CLDN4, OCLN, VCAN, CLDN15, CD6, CLDN7, PECAM1, SDC1, ITGA6, ESAM, CDH15, CD22, NECTIN1                                                                                                                                                                                                                                                                                                                                      |

**Supplementary table 16. KEGG pathway analysis for significant DRGs in Ad-KLF4 versus Ad-EGFP transduced samples on IL-1 $\beta$  stimulation.**

| Pathway                           | P value  | FDR      | Enriched genes                                                                                                                                                                                                                                                                                                                                                                                                |
|-----------------------------------|----------|----------|---------------------------------------------------------------------------------------------------------------------------------------------------------------------------------------------------------------------------------------------------------------------------------------------------------------------------------------------------------------------------------------------------------------|
| Ribosome                          | 8.52E-22 | 2.22E-19 | RPL5, RPL30, RPL32, RPL31, RPL34, RPLP1, RPLP0, RPL10A, RPL9, RPL6, RPS4X, RPS14, MRPL3, RPL7A, RPS17, RPL18A, RPS18, RPL35, RPL37, RPS11, RPL39, RPS10, RPS13, RPS7, RPL23, RPS5, RPL22, RPS6, RPL13A, RPS3A, RPSA, RPL37A, RPL24, RPL27, RPL29, RPL12, RPL11, RPL36A, MRPL15, MRPL12, MRPL11, RPS3, RPL14, RPL15, RPS27A, RPL18, RPL41, MRPL23, MRPL24, RPS26, RPS25, RPS29, RPL27A, RPL22L1, RPS23         |
| TNF signaling pathway             | 3.48E-07 | 4.54E-05 | CSF2, TNFAIP3, CXCL1, CXCL3, PTGS2, CXCL2, BAG4, CASP3, CCL5, AKT3, CCL2, MAP2K6, MAP3K5, EDN1, VCAM1, JAG1, CCL20, MMP3, LIF, TRAF1, MAPK12, NFKB1, IL6, PIK3CA, IL1B, TRAF5, BIRC2, BIRC3, CREB5                                                                                                                                                                                                            |
| Ribosome biogenesis in eukaryotes | 8.52E-07 | 7.41E-05 | RBM28, POP5, POP1, WDR3, HEATR1, NAT10, SNU13, SPATA5, WDR43, NOL6, FBL, EMG1, RIOK1, MDN1, NOP56, UTP15, UTP6, NOP58, WDR36, WDR75, GNL3, RCL1, DKC1, NHP2, RAN                                                                                                                                                                                                                                              |
| Pathways in cancer                | 8.76E-05 | 4.69E-03 | CXCL8, CBLB, ETS1, FGF2, IGF1R, MYC, CASP3, SUFU, AKT3, BDKRB2, ITGAV, SKP2, APPL1, PDGFRB, WNT5B, MMP1, WNT5A, F2R, TRAF1, TGFB1, RUNX1, AR, PIK3CA, SMO, TRAF5, CKS2, BIRC5, BIRC2, BIRC3, LPAR1, LPAR4, CBL, PTGS2, HIF1A, EGFR, GNG2, GNA12, BID, SMAD2, ARNT2, STAT5B, TGFB2, FZD3, FZD2, SMAD3, TGFB3, CDKN2A, FZD9, FN1, VEGFB, VEGFC, FZD8, GNG12, GNG11, NFKB1, NFKB2, IL6, CXCL12, CDK6, CDK4, GNB4 |
| Legionellosis                     | 8.98E-05 | 4.69E-03 | HSPA8, CXCL8, BNIP3, CXCL1, CXCL3, CXCL2, NFKB1, HSPD1, NFKB2, EEF1A1, IL6, IL1B, CASP3, CASP1, IL12A, SEC22B                                                                                                                                                                                                                                                                                                 |
| Cell cycle                        | 1.78E-04 | 7.73E-03 | CCNH, BUB1B, TTK, CDC14A, CCNB1, PTTG1, MYC, BUB3, E2F5, SKP2, SMAD2, TGFB2, SMAD3, TGFB3, CDKN2A, PLK1, CDC25C, CCNA2, DBF4, TFDP1, CDK6, CDK4, ANAPC1, MCM2, ATR, MAD2L1                                                                                                                                                                                                                                    |

**Supplementary table 17. Summary of ChIP-seq samples.**

| Type of cell sample            | Sample name         | Read count  | Peak count |
|--------------------------------|---------------------|-------------|------------|
| HA-KLF4 transfected cells      | HA-KLF4_CHIP_1      | 162,353,773 | 111,486    |
|                                | HA-KLF4_CHIP_2      | 87,796,065  | 133,050    |
|                                | HA-KLF4_IgG-control | 95,566,666  | 253        |
|                                | HA-KLF4_input       | 103,260,354 | -          |
| Empty vector transfected cells | Empty_CHIP          | 120,358,677 | 800        |
|                                | Empty_input         | 107,266,691 | -          |

**Supplementary table 18. Gene ontology analysis for ChIP-seq peaks.**

| Gene ontology term (GO Biological Process)                                                                                         | Binomial <i>P</i> -value | Binomial FDR |
|------------------------------------------------------------------------------------------------------------------------------------|--------------------------|--------------|
| regulation of generation of precursor metabolites and energy                                                                       | 2.20432e-186             | 4.46086e-184 |
| negative regulation of phospholipid metabolic process                                                                              | 1.13969e-179             | 2.11148e-177 |
| negative regulation of phospholipid biosynthetic process                                                                           | 2.79295e-170             | 4.83401e-168 |
| regulation of myotube differentiation                                                                                              | 3.97078e-167             | 6.52896e-165 |
| positive regulation of vascular permeability                                                                                       | 1.62615e-155             | 2.43072e-153 |
| platelet-derived growth factor receptor-beta signaling pathway                                                                     | 1.27942e-152             | 1.71729e-150 |
| apoptotic cell clearance                                                                                                           | 2.47582e-139             | 2.75991e-137 |
| endoplasmic reticulum unfolded protein response                                                                                    | 2.49979e-137             | 2.74019e-135 |
| regulation of vascular permeability                                                                                                | 2.13695e-135             | 2.28532e-133 |
| negative regulation of intrinsic apoptotic signaling pathway                                                                       | 1.93118e-130             | 1.93914e-128 |
| positive regulation of metanephric mesenchymal cell migration by platelet-derived growth factor receptor-beta signaling pathway    | 2.13149e-124             | 2.03171e-122 |
| adhesion of symbiont to host                                                                                                       | 5.14010e-123             | 4.79524e-121 |
| negative regulation of protein import into nucleus, translocation                                                                  | 1.53306e-120             | 1.36256e-118 |
| regulation of metanephric mesenchymal cell migration                                                                               | 5.17985e-120             | 4.54238e-118 |
| negative regulation of glycolytic process                                                                                          | 1.03732e-119             | 8.97690e-118 |
| regulation of ARF protein signal transduction                                                                                      | 3.78675e-117             | 3.09385e-115 |
| negative regulation of phosphatidylinositol biosynthetic process                                                                   | 1.73564e-115             | 1.36710e-113 |
| integrin biosynthetic process                                                                                                      | 4.15618e-114             | 3.19710e-112 |
| liver regeneration                                                                                                                 | 7.20208e-114             | 5.47608e-112 |
| positive regulation of protein sumoylation                                                                                         | 5.22365e-113             | 3.86022e-111 |
| negative regulation of Notch signaling pathway                                                                                     | 3.44071e-112             | 2.45973e-110 |
| osteoblast development                                                                                                             | 2.01748e-104             | 1.31376e-102 |
| cerebellar Purkinje cell-granule cell precursor cell signaling involved in regulation of granule cell precursor cell proliferation | 5.19671e-104             | 3.31833e-102 |
| positive regulation of cerebellar granule cell precursor proliferation                                                             | 5.70945e-104             | 3.62812e-102 |
| sarcosine catabolic process                                                                                                        | 3.79472e-103             | 2.37694e-101 |
| negative regulation of carbohydrate metabolic process                                                                              | 8.12772e-103             | 5.06692e-101 |
| anatomical structure regression                                                                                                    | 1.81360e-101             | 1.10445e-99  |
| regulation of necrotic cell death                                                                                                  | 3.12533e-101             | 1.89450e-99  |
| positive regulation of translational initiation by iron                                                                            | 7.45355e-101             | 4.41639e-99  |
| regulation of cerebellar granule cell precursor proliferation                                                                      | 1.00956e-100             | 5.92849e-99  |
| nuclear-transcribed mRNA catabolic process, nonsense-mediated decay                                                                | 1.38710e-100             | 8.10931e-99  |
| positive regulation of nuclease activity                                                                                           | 9.90067e-99              | 5.66232e-97  |
| recognition of apoptotic cell                                                                                                      | 1.88701e-97              | 1.04733e-95  |
| negative regulation of cellular carbohydrate metabolic process                                                                     | 1.25214e-96              | 6.86278e-95  |
| peroxisome proliferator activated receptor signaling pathway                                                                       | 2.09241e-96              | 1.14206e-94  |
| regulation of metaphase plate congression                                                                                          | 8.93726e-96              | 4.81806e-94  |
| positive regulation of mRNA catabolic process                                                                                      | 2.95387e-95              | 1.58593e-93  |
| positive regulation of mRNA metabolic process                                                                                      | 3.38428e-95              | 1.80963e-93  |
| regulation of translational initiation by iron                                                                                     | 2.66985e-94              | 1.39917e-92  |
| compartment pattern specification                                                                                                  | 1.15556e-93              | 6.03185e-92  |
| positive regulation of myotube differentiation                                                                                     | 6.87816e-93              | 3.54805e-91  |
| regulation of branching involved in salivary gland morphogenesis by epithelial-mesenchymal signaling                               | 6.92287e-92              | 3.46249e-90  |
| embryonic lung development                                                                                                         | 6.92287e-92              | 3.46249e-90  |
| regulation of glycolytic process                                                                                                   | 1.00857e-91              | 5.00633e-90  |
| N-terminal peptidyl-alanine trimethylation                                                                                         | 4.26710e-91              | 2.09438e-89  |
| N-terminal peptidyl-glycine methylation                                                                                            | 4.26710e-91              | 2.09438e-89  |
| N-terminal peptidyl-proline dimethylation                                                                                          | 4.26710e-91              | 2.09438e-89  |
| N-terminal peptidyl-serine dimethylation                                                                                           | 4.26710e-91              | 2.09438e-89  |
| N-terminal peptidyl-serine trimethylation                                                                                          | 4.26710e-91              | 2.09438e-89  |
| virion attachment to host cell                                                                                                     | 8.54443e-91              | 4.11697e-89  |
| positive regulation of transcription from RNA polymerase II promoter in response to stress                                         | 1.69622e-90              | 8.14308e-89  |
| mitotic spindle organization in nucleus                                                                                            | 1.78104e-90              | 8.51920e-89  |
| regulation of mitochondrial membrane permeability involved in programmed necrotic cell death                                       | 4.55689e-90              | 2.15616e-88  |
| positive regulation of nuclear-transcribed mRNA catabolic process, deadenylation-dependent decay                                   | 4.98083e-90              | 2.34831e-88  |
| regulation of cellular ketone metabolic process by regulation of transcription from RNA polymerase II promoter                     | 6.88578e-90              | 3.23484e-88  |
| corpus callosum development                                                                                                        | 9.32334e-90              | 4.36439e-88  |
| regulation of proton-transporting ATPase activity, rotational mechanism                                                            | 1.91752e-89              | 8.94433e-88  |
| lobar bronchus development                                                                                                         | 1.00114e-88              | 4.58851e-87  |
| negative regulation of ATP metabolic process                                                                                       | 1.23389e-88              | 5.63564e-87  |
| coronary vein morphogenesis                                                                                                        | 2.69783e-87              | 1.21117e-85  |
| negative regulation of myeloid leukocyte mediated immunity                                                                         | 1.09748e-85              | 4.79609e-84  |
| negative regulation of blood vessel remodeling                                                                                     | 6.33181e-85              | 2.73976e-83  |
| cytoplasmic sequestering of protein                                                                                                | 7.00954e-85              | 3.02307e-83  |
| phagocytosis, recognition                                                                                                          | 9.84212e-85              | 4.21705e-83  |

|                                                                                                                         |             |             |
|-------------------------------------------------------------------------------------------------------------------------|-------------|-------------|
| primitive erythrocyte differentiation                                                                                   | 1.11134e-84 | 4.74629e-83 |
| regulation of gene expression by genetic imprinting                                                                     | 3.04124e-84 | 1.29464e-82 |
| negative regulation of myotube differentiation                                                                          | 2.60085e-83 | 1.08608e-81 |
| negative regulation of neutrophil activation                                                                            | 2.96659e-83 | 1.23489e-81 |
| negative regulation of neutrophil degranulation                                                                         | 1.02851e-82 | 4.24109e-81 |
| positive regulation of triglyceride biosynthetic process                                                                | 1.46280e-82 | 6.01301e-81 |
| negative regulation of leukocyte degranulation                                                                          | 3.14594e-82 | 1.27721e-80 |
| positive regulation of lamellipodium assembly                                                                           | 5.37804e-81 | 2.15023e-79 |
| notochord regression                                                                                                    | 6.59551e-81 | 2.62901e-79 |
| positive regulation of lamellipodium organization                                                                       | 1.19506e-80 | 4.74921e-79 |
| negative regulation of peptidyl-tyrosine phosphorylation                                                                | 2.47096e-80 | 9.76065e-79 |
| regulation of leukocyte degranulation                                                                                   | 2.65240e-80 | 1.04460e-78 |
| regulation of cell projection size                                                                                      | 3.81719e-80 | 1.49884e-78 |
| regulation of mRNA catabolic process                                                                                    | 3.88732e-80 | 1.52184e-78 |
| peptidyl-glycine modification                                                                                           | 4.35079e-80 | 1.69823e-78 |
| regulation of somitogenesis                                                                                             | 8.72363e-80 | 3.38497e-78 |
| floor plate morphogenesis                                                                                               | 1.78107e-79 | 6.87042e-78 |
| negative regulation of inner ear receptor cell differentiation                                                          | 1.85942e-79 | 7.15171e-78 |
| regulation of triglyceride biosynthetic process                                                                         | 2.27697e-79 | 8.73215e-78 |
| negative regulation of very-low-density lipoprotein particle clearance                                                  | 3.61769e-79 | 1.37139e-77 |
| protein trimerization                                                                                                   | 2.76184e-78 | 1.03798e-76 |
| activation of signaling protein activity involved in unfolded protein response                                          | 4.07016e-78 | 1.52532e-76 |
| negative regulation of endodermal cell differentiation                                                                  | 1.09043e-77 | 4.05183e-76 |
| positive regulation of beta-amyloid clearance                                                                           | 1.24303e-77 | 4.58007e-76 |
| negative regulation of tumor necrosis factor production                                                                 | 7.08072e-77 | 2.56583e-75 |
| negative regulation of toll-like receptor 9 signaling pathway                                                           | 8.79796e-77 | 3.17935e-75 |
| regulation of neutrophil activation                                                                                     | 1.27049e-76 | 4.57863e-75 |
| inhibition of neuroepithelial cell differentiation                                                                      | 2.67657e-76 | 9.56727e-75 |
| negative regulation of tumor necrosis factor superfamily cytokine production                                            | 6.69259e-76 | 2.37289e-74 |
| regulation of myeloid leukocyte mediated immunity                                                                       | 6.78810e-76 | 2.40029e-74 |
| negative regulation of dendritic cell apoptotic process                                                                 | 1.96416e-75 | 6.90816e-74 |
| floor plate formation                                                                                                   | 2.12125e-75 | 7.44078e-74 |
| receptor-mediated virion attachment to host cell                                                                        | 8.16361e-75 | 2.83335e-73 |
| regulation of phospholipid catabolic process                                                                            | 2.05595e-74 | 7.04270e-73 |
| regulation of neutrophil degranulation                                                                                  | 2.19433e-73 | 7.38215e-72 |
| negative regulation of interferon-beta production                                                                       | 2.24847e-73 | 7.54499e-72 |
| negative regulation of oligodendrocyte apoptotic process                                                                | 5.15471e-73 | 1.72094e-71 |
| negative regulation of renal albumin absorption                                                                         | 5.15471e-73 | 1.72094e-71 |
| tRNA thio-modification                                                                                                  | 1.06257e-72 | 3.52954e-71 |
| negative regulation of auditory receptor cell differentiation                                                           | 3.31206e-72 | 1.09190e-70 |
| regulation of vascular endothelial growth factor signaling pathway                                                      | 8.82886e-72 | 2.88892e-70 |
| nucleus localization                                                                                                    | 2.54198e-71 | 8.23578e-70 |
| IRE1-mediated unfolded protein response                                                                                 | 4.39152e-71 | 1.41931e-69 |
| regulation of pri-miRNA transcription from RNA polymerase II promoter                                                   | 4.82381e-71 | 1.55521e-69 |
| response to hydrostatic pressure                                                                                        | 5.28959e-71 | 1.69705e-69 |
| response to muscle inactivity                                                                                           | 6.72715e-71 | 2.15302e-69 |
| inner medullary collecting duct development                                                                             | 9.26247e-71 | 2.95008e-69 |
| response to denervation involved in regulation of muscle adaptation                                                     | 1.11060e-70 | 3.52871e-69 |
| ventral midline development                                                                                             | 3.25850e-70 | 1.02787e-68 |
| smoothened signaling pathway involved in regulation of cerebellar granule cell precursor cell proliferation             | 3.25850e-70 | 1.02787e-68 |
| regulation of blood vessel remodeling                                                                                   | 9.56045e-70 | 2.98713e-68 |
| transcytosis                                                                                                            | 1.55947e-69 | 4.84948e-68 |
| regulation of renal albumin absorption                                                                                  | 3.60216e-69 | 1.11227e-67 |
| regulation of platelet-derived growth factor receptor signaling pathway                                                 | 4.86712e-69 | 1.49584e-67 |
| positive regulation of transcription from RNA polymerase II promoter in response to endoplasmic reticulum stress        | 1.30941e-68 | 4.01490e-67 |
| negative regulation of interferon-alpha production                                                                      | 6.83223e-68 | 2.06600e-66 |
| response to water                                                                                                       | 7.66508e-68 | 2.30724e-66 |
| regulation of cellular ketone metabolic process by negative regulation of transcription from RNA polymerase II promoter | 1.81972e-66 | 5.44012e-65 |
| vascular smooth muscle cell development                                                                                 | 3.41791e-66 | 1.01488e-64 |
| positive regulation of myoblast fusion                                                                                  | 1.02513e-65 | 3.03025e-64 |
| ventral spinal cord interneuron specification                                                                           | 1.21662e-65 | 3.58820e-64 |
| atrioventricular valve formation                                                                                        | 1.71557e-65 | 5.03718e-64 |
| negative regulation of pri-miRNA transcription from RNA polymerase II promoter                                          | 2.88157e-65 | 8.44190e-64 |
| positive regulation of cholesterol metabolic process                                                                    | 3.07795e-65 | 8.99720e-64 |
| regulation of myoblast fusion                                                                                           | 4.14273e-65 | 1.20828e-63 |
| re-entry into mitotic cell cycle                                                                                        | 1.35478e-64 | 3.92528e-63 |
| response to inactivity                                                                                                  | 1.38241e-64 | 3.99653e-63 |

|                                                                                                              |             |             |
|--------------------------------------------------------------------------------------------------------------|-------------|-------------|
| regulation of platelet-derived growth factor receptor-beta signaling pathway                                 | 2.27324e-64 | 6.52888e-63 |
| regulation of cellular response to vascular endothelial growth factor stimulus                               | 3.02431e-64 | 8.64820e-63 |
| paramesonephric duct development                                                                             | 3.67911e-64 | 1.04978e-62 |
| negative regulation of endoplasmic reticulum unfolded protein response                                       | 1.02167e-63 | 2.87775e-62 |
| histone H3 deacetylation                                                                                     | 1.18189e-63 | 3.31482e-62 |
| negative regulation of type I interferon production                                                          | 1.51230e-63 | 4.22351e-62 |
| negative regulation of vascular endothelial growth factor receptor signaling pathway                         | 5.14403e-63 | 1.43357e-61 |
| positive regulation of triglyceride metabolic process                                                        | 5.20216e-63 | 1.44671e-61 |
| hematopoietic stem cell migration to bone marrow                                                             | 9.57076e-63 | 2.65599e-61 |
| cellular protein complex localization                                                                        | 4.01714e-62 | 1.10547e-60 |
| positive regulation of protein maturation                                                                    | 9.21885e-62 | 2.51587e-60 |
| dentinogenesis                                                                                               | 1.43013e-61 | 3.88677e-60 |
| regulation of lamellipodium assembly                                                                         | 2.22773e-61 | 6.01716e-60 |
| secretory columnar luminal epithelial cell differentiation involved in prostate glandular acinus development | 2.25424e-61 | 6.07628e-60 |
| genetic imprinting                                                                                           | 3.22360e-61 | 8.65371e-60 |
| platelet aggregation                                                                                         | 6.34974e-61 | 1.70111e-59 |
| osteoclast maturation                                                                                        | 1.17357e-60 | 3.13762e-59 |
| dorsal spinal cord development                                                                               | 1.31134e-60 | 3.49178e-59 |
| regulation of nuclease activity                                                                              | 7.28940e-60 | 1.91769e-58 |
| multi-organism membrane organization                                                                         | 9.59867e-60 | 2.52018e-58 |
| tRNA wobble position uridine thiolation                                                                      | 1.12074e-59 | 2.93670e-58 |
| positive regulation of release of cytochrome c from mitochondria                                             | 1.25947e-59 | 3.29366e-58 |
| negative regulation of glial cell apoptotic process                                                          | 1.74307e-59 | 4.54027e-58 |
| cardiac vascular smooth muscle cell development                                                              | 2.45658e-59 | 6.36099e-58 |
| protein kinase C signaling                                                                                   | 2.82976e-59 | 7.29857e-58 |
| positive regulation of protein processing                                                                    | 3.64294e-59 | 9.35921e-58 |
| regulation of protein sumoylation                                                                            | 4.70456e-59 | 1.20396e-57 |
| positive regulation of viral entry into host cell                                                            | 4.91672e-59 | 1.25582e-57 |
| wound healing, spreading of epidermal cells                                                                  | 8.03168e-59 | 2.03955e-57 |
| cytoplasm organization                                                                                       | 9.81080e-59 | 2.48654e-57 |
| mitral valve formation                                                                                       | 1.27533e-58 | 3.21991e-57 |
| ventral spinal cord interneuron fate commitment                                                              | 1.34800e-58 | 3.39685e-57 |
| proximal tubule development                                                                                  | 1.73479e-58 | 4.36317e-57 |
| negative regulation of cell growth involved in cardiac muscle cell development                               | 4.57644e-58 | 1.14012e-56 |
| argininosuccinate metabolic process                                                                          | 5.12109e-58 | 1.27340e-56 |
| chorio-allantoic fusion                                                                                      | 7.12944e-58 | 1.76945e-56 |
| glomerular mesangial cell development                                                                        | 8.26018e-58 | 2.04622e-56 |
| negative regulation of platelet-derived growth factor receptor-beta signaling pathway                        | 8.93351e-58 | 2.20886e-56 |
| Golgi vesicle fusion to target membrane                                                                      | 1.47627e-57 | 3.64332e-56 |
| retinoic acid receptor signaling pathway                                                                     | 2.72735e-57 | 6.69319e-56 |
| positive regulation of nuclear-transcribed mRNA poly(A) tail shortening                                      | 1.53361e-56 | 3.71513e-55 |
| positive regulation of protein kinase D signaling                                                            | 1.79358e-56 | 4.32894e-55 |
| protein heterotrimerization                                                                                  | 4.36372e-56 | 1.04745e-54 |
| exit from mitosis                                                                                            | 4.47671e-56 | 1.07262e-54 |
| N-terminal protein amino acid methylation                                                                    | 4.90656e-56 | 1.17347e-54 |
| glomerular mesangium development                                                                             | 5.70616e-56 | 1.36223e-54 |
| negative regulation of uterine smooth muscle contraction                                                     | 8.16051e-56 | 1.94111e-54 |
| positive regulation of cholesterol biosynthetic process                                                      | 1.64559e-55 | 3.90020e-54 |
| positive regulation of anterior head development                                                             | 2.00508e-55 | 4.74366e-54 |
| regulation of mitophagy                                                                                      | 3.97376e-55 | 9.35077e-54 |
| regulation of cell growth by extracellular stimulus                                                          | 8.73138e-55 | 2.03639e-53 |
| positive regulation of receptor catabolic process                                                            | 2.34878e-54 | 5.44900e-53 |
| miRNA mediated inhibition of translation                                                                     | 2.78896e-54 | 6.45881e-53 |
| regulation of phosphatidylcholine catabolic process                                                          | 3.04712e-54 | 7.04426e-53 |
| positive regulation of dendritic cell chemotaxis                                                             | 5.51340e-54 | 1.27234e-52 |
| establishment or maintenance of polarity of embryonic epithelium                                             | 5.72688e-54 | 1.31929e-52 |
| outer medullary collecting duct development                                                                  | 5.72688e-54 | 1.31929e-52 |
| positive regulation of mitochondrial membrane permeability                                                   | 7.02812e-54 | 1.61340e-52 |
| macrophage cytokine production                                                                               | 8.45507e-54 | 1.93760e-52 |
| regulation of toll-like receptor 9 signaling pathway                                                         | 8.60393e-54 | 1.96486e-52 |
| positive regulation of epidermal growth factor receptor signaling pathway                                    | 1.47727e-53 | 3.35613e-52 |
| negative regulation of lipoprotein particle clearance                                                        | 2.52446e-53 | 5.69584e-52 |
| heparan sulfate proteoglycan catabolic process                                                               | 3.66696e-53 | 8.24534e-52 |
| potassium ion export across plasma membrane                                                                  | 3.70744e-53 | 8.32213e-52 |
| mRNA transcription                                                                                           | 6.68500e-53 | 1.49803e-51 |
| mRNA transcription from RNA polymerase II promoter                                                           | 1.04293e-52 | 2.31736e-51 |

|                                                                                                   |             |             |
|---------------------------------------------------------------------------------------------------|-------------|-------------|
| positive regulation of keratinocyte differentiation                                               | 1.36364e-52 | 3.01974e-51 |
| nuclear membrane organization                                                                     | 1.51460e-52 | 3.34841e-51 |
| positive regulation of metanephros development                                                    | 2.35137e-52 | 5.17224e-51 |
| mitochondrial outer membrane permeabilization involved in programmed cell death                   | 4.92041e-52 | 1.07692e-50 |
| cellular response to pH                                                                           | 2.75517e-51 | 5.96076e-50 |
| regulation of beta-amyloid clearance                                                              | 5.30954e-51 | 1.14494e-49 |
| negative regulation of phosphatidylcholine biosynthetic process                                   | 6.97090e-51 | 1.49584e-49 |
| positive regulation of interleukin-10 secretion                                                   | 7.22663e-51 | 1.54819e-49 |
| fibroblast proliferation                                                                          | 1.17591e-50 | 2.50291e-49 |
| plasma membrane repair                                                                            | 1.48144e-50 | 3.14812e-49 |
| collecting duct development                                                                       | 1.69166e-50 | 3.58327e-49 |
| regulation of lipoprotein particle clearance                                                      | 1.70808e-50 | 3.61223e-49 |
| maintenance of protein localization in organelle                                                  | 3.29609e-50 | 6.91496e-49 |
| collagen biosynthetic process                                                                     | 5.39323e-50 | 1.12429e-48 |
| cellular response to arsenic-containing substance                                                 | 7.75391e-50 | 1.60875e-48 |
| regulation of Schwann cell proliferation                                                          | 9.26767e-50 | 1.91980e-48 |
| cerebellar molecular layer formation                                                              | 2.12073e-49 | 4.36558e-48 |
| Notch signaling pathway involved in arterial endothelial cell fate commitment                     | 2.12073e-49 | 4.36558e-48 |
| axial mesoderm formation                                                                          | 3.08131e-49 | 6.31332e-48 |
| negative regulation of membrane hyperpolarization                                                 | 3.55984e-49 | 7.28246e-48 |
| response to vitamin E                                                                             | 3.60477e-49 | 7.36290e-48 |
| positive regulation of transcription from RNA polymerase II promoter in response to hypoxia       | 3.67351e-49 | 7.49168e-48 |
| ribosomal small subunit assembly                                                                  | 4.74926e-49 | 9.65562e-48 |
| spinal cord association neuron differentiation                                                    | 6.93810e-49 | 1.40839e-47 |
| positive regulation of membrane permeability                                                      | 8.87920e-49 | 1.79965e-47 |
| granulocyte differentiation                                                                       | 1.72557e-48 | 3.46537e-47 |
| negative regulation of endoplasmic reticulum stress-induced intrinsic apoptotic signaling pathway | 2.13304e-48 | 4.25766e-47 |
| positive regulation of cell fate commitment                                                       | 3.74468e-48 | 7.41831e-47 |
| negative regulation of toll-like receptor signaling pathway                                       | 5.00274e-48 | 9.86597e-47 |
| regulation of IRE1-mediated unfolded protein response                                             | 1.58401e-47 | 3.07770e-46 |
| response to vitamin K                                                                             | 1.96617e-47 | 3.80897e-46 |
| negative regulation of inclusion body assembly                                                    | 2.87620e-47 | 5.54744e-46 |
| aldehyde biosynthetic process                                                                     | 3.29246e-47 | 6.33173e-46 |
| malonate catabolic process                                                                        | 4.47751e-47 | 8.56064e-46 |
| glomerular mesangial cell differentiation                                                         | 5.49351e-47 | 1.04727e-45 |
| negative regulation of protein tyrosine kinase activity                                           | 6.98521e-47 | 1.32779e-45 |
| Peyer's patch development                                                                         | 7.59796e-47 | 1.44219e-45 |
| lateral inhibition                                                                                | 7.66270e-47 | 1.45238e-45 |
| dichotomous subdivision of terminal units involved in lung branching                              | 4.77898e-46 | 8.89146e-45 |
| cardiac vascular smooth muscle cell differentiation                                               | 6.89691e-46 | 1.27419e-44 |
| primitive hemopoiesis                                                                             | 7.60355e-46 | 1.40276e-44 |
| regulation of aerobic respiration                                                                 | 7.67487e-46 | 1.41394e-44 |
| endocytic recycling                                                                               | 1.14517e-45 | 2.10680e-44 |
| peptidyl-lysine deacetylation                                                                     | 1.29852e-45 | 2.38558e-44 |
| comma-shaped body morphogenesis                                                                   | 1.43971e-45 | 2.63392e-44 |
| regulation of non-motile cilium assembly                                                          | 1.57525e-45 | 2.87790e-44 |
| protein localization involved in establishment of planar polarity                                 | 1.59884e-45 | 2.91694e-44 |
| negative regulation of hepatocyte growth factor biosynthetic process                              | 3.36058e-45 | 6.09725e-44 |
| diacylglycerol metabolic process                                                                  | 7.33821e-45 | 1.32592e-43 |
| protein import into peroxisome matrix, translocation                                              | 1.49279e-44 | 2.68989e-43 |
| regulation of viral entry into host cell                                                          | 2.27208e-44 | 4.05521e-43 |
| behavioral response to nicotine                                                                   | 2.49312e-44 | 4.44369e-43 |
| positive regulation of IRE1-mediated unfolded protein response                                    | 2.64001e-44 | 4.69914e-43 |
| prostaglandin metabolic process                                                                   | 2.67760e-44 | 4.75961e-43 |
| heterochromatin organization                                                                      | 2.87789e-44 | 5.10873e-43 |
| histone H3-K9 demethylation                                                                       | 6.67453e-44 | 1.17533e-42 |
| regulation of oxidative phosphorylation                                                           | 6.86593e-44 | 1.20741e-42 |
| negative regulation of Schwann cell proliferation                                                 | 8.16446e-44 | 1.43194e-42 |
| metanephric tubule morphogenesis                                                                  | 8.64711e-44 | 1.51457e-42 |
| intermediate filament organization                                                                | 1.32309e-43 | 2.31128e-42 |
| nuclear migration                                                                                 | 1.88803e-43 | 3.28942e-42 |
| dephosphorylation of RNA polymerase II C-terminal domain                                          | 2.57477e-43 | 4.46814e-42 |
| entrainment of circadian clock by photoperiod                                                     | 3.36894e-43 | 5.83860e-42 |
| maturation of SSU-rRNA from tricistronic rRNA transcript (SSU-rRNA, 5.8S rRNA, LSU-rRNA)          | 3.39068e-43 | 5.86856e-42 |
| positive regulation of syncytium formation by plasma membrane fusion                              | 4.00967e-43 | 6.93077e-42 |
| prostaglandin biosynthetic process                                                                | 4.48546e-43 | 7.74301e-42 |
| regulation of syncytium formation by plasma membrane fusion                                       | 4.77461e-43 | 8.23136e-42 |
| D-serine transport                                                                                | 6.40325e-43 | 1.09959e-41 |
| inositol phosphate catabolic process                                                              | 7.08563e-43 | 1.21518e-41 |



|                                                                                                                                      |             |             |
|--------------------------------------------------------------------------------------------------------------------------------------|-------------|-------------|
| negative regulation of PERK-mediated unfolded protein response                                                                       | 1.07747e-42 | 1.83588e-41 |
| photoperiodism                                                                                                                       | 1.08775e-42 | 1.85100e-41 |
| Peyer's patch morphogenesis                                                                                                          | 1.21035e-42 | 2.05697e-41 |
| positive regulation of protein kinase C signaling                                                                                    | 1.54397e-42 | 2.61718e-41 |
| negative regulation of mRNA splicing, via spliceosome                                                                                | 1.71916e-42 | 2.91040e-41 |
| TORC1 signaling                                                                                                                      | 2.18050e-42 | 3.68194e-41 |
| positive regulation of Wnt-mediated midbrain dopaminergic neuron differentiation                                                     | 2.23496e-42 | 3.76906e-41 |
| bone marrow development                                                                                                              | 2.53788e-42 | 4.26895e-41 |
| negative regulation of Notch signaling pathway involved in somitogenesis                                                             | 3.22780e-42 | 5.41563e-41 |
| heterochromatin assembly                                                                                                             | 7.61208e-42 | 1.26586e-40 |
| positive regulation of skeletal muscle tissue growth                                                                                 | 1.09202e-41 | 1.81141e-40 |
| negative regulation of platelet-derived growth factor receptor signaling pathway                                                     | 1.10983e-41 | 1.83863e-40 |
| transition between slow and fast fiber                                                                                               | 1.11726e-41 | 1.84860e-40 |
| fusion of virus membrane with host plasma membrane                                                                                   | 1.30693e-41 | 2.15161e-40 |
| positive regulation of dermatome development                                                                                         | 1.51085e-41 | 2.47802e-40 |
| death-inducing signaling complex assembly                                                                                            | 1.96137e-41 | 3.20496e-40 |
| regulation of transcription of nuclear large rRNA transcript from RNA polymerase I promoter                                          | 3.21641e-41 | 5.24271e-40 |
| cysteinyl-tRNA aminoacylation                                                                                                        | 4.32126e-41 | 7.01750e-40 |
| sucrose transport                                                                                                                    | 7.20445e-41 | 1.16422e-39 |
| negative regulation of G1/S transition of mitotic cell cycle by negative regulation of transcription from RNA polymerase II promoter | 9.53129e-41 | 1.53834e-39 |
| peroxisome transport along microtubule                                                                                               | 1.00728e-40 | 1.62374e-39 |
| protein import into peroxisome matrix, substrate release                                                                             | 1.00728e-40 | 1.62374e-39 |
| calcium ion regulated lysosome exocytosis                                                                                            | 1.10791e-40 | 1.78160e-39 |
| positive regulation of intrinsic apoptotic signaling pathway in response to DNA damage                                               | 1.29096e-40 | 2.07088e-39 |
| regulation of atrial cardiac muscle cell membrane repolarization                                                                     | 1.30810e-40 | 2.09583e-39 |
| regulation of exit from mitosis                                                                                                      | 1.54097e-40 | 2.46293e-39 |
| positive regulation of platelet-derived growth factor receptor signaling pathway                                                     | 1.82639e-40 | 2.90852e-39 |
| negative regulation of NIK/NF-kappaB signaling                                                                                       | 2.94673e-40 | 4.66441e-39 |
| virion assembly                                                                                                                      | 3.21012e-40 | 5.06914e-39 |
| negative regulation of mesenchymal cell apoptotic process involved in nephron morphogenesis                                          | 3.64399e-40 | 5.74736e-39 |
| negative regulation of RIG-I signaling pathway                                                                                       | 4.99963e-40 | 7.87606e-39 |
| cytoplasmic sequestering of transcription factor                                                                                     | 5.02367e-40 | 7.90447e-39 |
| surfactant homeostasis                                                                                                               | 5.72172e-40 | 8.99206e-39 |
| DNA methylation involved in embryo development                                                                                       | 6.09945e-40 | 9.57424e-39 |
| sphingomyelin catabolic process                                                                                                      | 7.36564e-40 | 1.15480e-38 |
| regulation of oxidative phosphorylation uncoupler activity                                                                           | 1.16080e-39 | 1.81776e-38 |
| negative regulation of oxidative phosphorylation uncoupler activity                                                                  | 1.21649e-39 | 1.90270e-38 |
| regulation of inclusion body assembly                                                                                                | 1.25988e-39 | 1.96822e-38 |
| renal filtration                                                                                                                     | 1.35508e-39 | 2.11444e-38 |
| positive regulation of lysosomal protein catabolic process                                                                           | 3.35125e-39 | 5.16187e-38 |
| neuronal signal transduction                                                                                                         | 3.45335e-39 | 5.31291e-38 |
| central nervous system vasculogenesis                                                                                                | 3.48656e-39 | 5.35774e-38 |
| choline catabolic process                                                                                                            | 3.94859e-39 | 6.05358e-38 |
| negative regulation of platelet activation                                                                                           | 4.54144e-39 | 6.94629e-38 |
| neuromuscular synaptic transmission                                                                                                  | 4.60425e-39 | 7.03418e-38 |
| cell-cell signaling involved in mammary gland development                                                                            | 4.61572e-39 | 7.04352e-38 |
| ESCRT III complex assembly                                                                                                           | 5.01389e-39 | 7.64225e-38 |
| inositol trisphosphate metabolic process                                                                                             | 8.97736e-39 | 1.35578e-37 |
| low-density lipoprotein particle clearance                                                                                           | 9.33192e-39 | 1.40771e-37 |
| protein polyglycylation                                                                                                              | 1.36829e-38 | 2.05932e-37 |
| renal system process involved in regulation of blood volume                                                                          | 1.90266e-38 | 2.85052e-37 |
| negative regulation of gluconeogenesis                                                                                               | 2.05097e-38 | 3.06923e-37 |
| regulation of skeletal muscle adaptation                                                                                             | 2.49012e-38 | 3.71794e-37 |
| diacylglycerol catabolic process                                                                                                     | 2.52473e-38 | 3.76107e-37 |
| orthogonal dichotomous subdivision of terminal units involved in lung branching morphogenesis                                        | 3.44407e-38 | 5.11901e-37 |
| planar dichotomous subdivision of terminal units involved in lung branching morphogenesis                                            | 3.44407e-38 | 5.11901e-37 |
| lateral sprouting involved in lung morphogenesis                                                                                     | 3.44407e-38 | 5.11901e-37 |
| metanephric comma-shaped body morphogenesis                                                                                          | 4.23291e-38 | 6.26318e-37 |
| establishment of blood-brain barrier                                                                                                 | 4.82305e-38 | 7.12036e-37 |
| negative regulation of stem cell population maintenance                                                                              | 5.04148e-38 | 7.43449e-37 |
| regulation of proton transport                                                                                                       | 6.78473e-38 | 9.96053e-37 |
| cerebellar Purkinje cell layer structural organization                                                                               | 9.19834e-38 | 1.34588e-36 |
| D-alanine transport                                                                                                                  | 9.86154e-38 | 1.43972e-36 |
| histone H4 deacetylation                                                                                                             | 1.58308e-37 | 2.29591e-36 |
| notochord cell development                                                                                                           | 2.22514e-37 | 3.21996e-36 |

|                                                                                                                       |             |             |
|-----------------------------------------------------------------------------------------------------------------------|-------------|-------------|
| mitotic DNA replication                                                                                               | 2.54881e-37 | 3.68429e-36 |
| base-excision repair, AP site formation                                                                               | 3.26719e-37 | 4.70204e-36 |
| phosphatidylcholine acyl-chain remodeling                                                                             | 3.76946e-37 | 5.41304e-36 |
| positive regulation of brown fat cell differentiation                                                                 | 6.42887e-37 | 9.18190e-36 |
| positive regulation of non-motile cilium assembly                                                                     | 7.03428e-37 | 1.00357e-35 |
| lobar bronchus epithelium development                                                                                 | 7.24152e-37 | 1.03201e-35 |
| regulation of PERK-mediated unfolded protein response                                                                 | 7.40793e-37 | 1.05459e-35 |
| negative regulation of apoptotic process involved in morphogenesis                                                    | 9.26660e-37 | 1.30927e-35 |
| oxalic acid secretion                                                                                                 | 1.25481e-36 | 1.76910e-35 |
| proline metabolic process                                                                                             | 1.40822e-36 | 1.98327e-35 |
| phagolysosome assembly                                                                                                | 1.61875e-36 | 2.27734e-35 |
| positive regulation of cell proliferation by VEGF-activated platelet derived growth factor receptor signaling pathway | 4.77413e-36 | 6.67364e-35 |
| positive regulation of anoikis                                                                                        | 5.38776e-36 | 7.52342e-35 |
| positive regulation of glutamate receptor signaling pathway                                                           | 1.02083e-35 | 1.41646e-34 |
| cellular component disassembly involved in execution phase of apoptosis                                               | 1.05536e-35 | 1.46282e-34 |
| negative regulation of protein homotetramerization                                                                    | 1.31835e-35 | 1.82543e-34 |
| regulation of dendritic cell chemotaxis                                                                               | 1.41482e-35 | 1.95489e-34 |
| response to stimulus involved in regulation of muscle adaptation                                                      | 1.43765e-35 | 1.98019e-34 |
| positive regulation of protein catabolic process in the vacuole                                                       | 2.16058e-35 | 2.96044e-34 |
| cholesterol catabolic process                                                                                         | 2.48064e-35 | 3.39193e-34 |
| metanephric collecting duct development                                                                               | 3.24487e-35 | 4.43230e-34 |
| kidney rudiment formation                                                                                             | 5.31573e-35 | 7.20856e-34 |
| synaptic vesicle membrane organization                                                                                | 5.79134e-35 | 7.83738e-34 |
| negative regulation of viral-induced cytoplasmic pattern recognition receptor signaling pathway                       | 5.79772e-35 | 7.83795e-34 |
| C21-steroid hormone biosynthetic process                                                                              | 6.30194e-35 | 8.51086e-34 |
| smoothened signaling pathway involved in ventral spinal cord patterning                                               | 7.50878e-35 | 1.01199e-33 |
| positive regulation of tongue muscle cell differentiation                                                             | 9.23062e-35 | 1.23898e-33 |
| establishment of planar polarity of embryonic epithelium                                                              | 9.71818e-35 | 1.30176e-33 |
| negative regulation of pro-B cell differentiation                                                                     | 1.16419e-34 | 1.55312e-33 |
| motor neuron apoptotic process                                                                                        | 1.26535e-34 | 1.68636e-33 |
| negative regulation of defense response to virus                                                                      | 1.26912e-34 | 1.68968e-33 |
| mature B cell differentiation involved in immune response                                                             | 1.44269e-34 | 1.91882e-33 |
| odontoblast differentiation                                                                                           | 1.46015e-34 | 1.94008e-33 |
| lipopolysaccharide transport                                                                                          | 1.74521e-34 | 2.31417e-33 |
| sphingomyelin metabolic process                                                                                       | 1.98942e-34 | 2.63003e-33 |
| skeletal muscle tissue growth                                                                                         | 2.49497e-34 | 3.28846e-33 |
| regulation of collagen fibril organization                                                                            | 2.59555e-34 | 3.41761e-33 |
| positive regulation of glomerular filtration                                                                          | 2.67925e-34 | 3.52076e-33 |
| regulation of muscle filament sliding                                                                                 | 3.26487e-34 | 4.27750e-33 |
| vitellogenesis                                                                                                        | 3.28009e-34 | 4.29316e-33 |
| rhodopsin mediated signaling pathway                                                                                  | 3.30495e-34 | 4.32140e-33 |
| positive regulation of phosphorylation of RNA polymerase II C-terminal domain serine 2 residues                       | 3.47719e-34 | 4.54211e-33 |
| response to carbon dioxide                                                                                            | 3.76597e-34 | 4.91444e-33 |
| response to anticoagulant                                                                                             | 3.76597e-34 | 4.91444e-33 |
| response to Thyroid stimulating hormone                                                                               | 3.76597e-34 | 4.91444e-33 |
| response to 2,3,7,8-tetrachlorodibenzodioxine                                                                         | 3.76597e-34 | 4.91444e-33 |
| response to astaxanthin                                                                                               | 3.76597e-34 | 4.91444e-33 |
| pericyte cell differentiation                                                                                         | 4.23641e-34 | 5.49022e-33 |
| anterograde axonal transport                                                                                          | 4.39423e-34 | 5.68355e-33 |
| depyrimidination                                                                                                      | 7.33566e-34 | 9.45085e-33 |
| smoothened signaling pathway involved in ventral spinal cord interneuron specification                                | 8.56558e-34 | 1.09924e-32 |
| smoothened signaling pathway involved in spinal cord motor neuron cell fate specification                             | 8.56558e-34 | 1.09924e-32 |
| ubiquitin-dependent endocytosis                                                                                       | 9.38099e-34 | 1.20153e-32 |
| regulation of glomerular filtration                                                                                   | 1.29518e-33 | 1.65245e-32 |
| positive regulation of mitochondrial membrane potential                                                               | 1.62712e-33 | 2.06994e-32 |
| cell-cell junction maintenance                                                                                        | 1.65361e-33 | 2.10161e-32 |
| positive regulation of T cell differentiation in thymus                                                               | 1.70557e-33 | 2.16345e-32 |
| regulation of protein homooligomerization                                                                             | 2.06044e-33 | 2.60856e-32 |
| regulation of protein catabolic process in the vacuole                                                                | 3.30043e-33 | 4.16241e-32 |
| defense response to fungus                                                                                            | 3.61812e-33 | 4.55869e-32 |
| mRNA cis splicing, via spliceosome                                                                                    | 3.81228e-33 | 4.79873e-32 |
| negative regulation of viral entry into host cell                                                                     | 4.12370e-33 | 5.18577e-32 |
| podosome assembly                                                                                                     | 4.27840e-33 | 5.37517e-32 |
| regulation of necroptotic process                                                                                     | 5.28573e-33 | 6.61546e-32 |
| Notch signaling pathway involved in regulation of secondary heart field cardioblast proliferation                     | 5.37262e-33 | 6.71781e-32 |
| venous endothelial cell differentiation                                                                               | 5.37262e-33 | 6.71781e-32 |

|                                                                                                         |             |             |
|---------------------------------------------------------------------------------------------------------|-------------|-------------|
| mRNA localization resulting in posttranscriptional regulation of gene expression                        | 6.37996e-33 | 7.95469e-32 |
| glomerular filtration                                                                                   | 6.51859e-33 | 8.11984e-32 |
| positive regulation of female gonad development                                                         | 7.97050e-33 | 9.90028e-32 |
| myeloid leukocyte cytokine production                                                                   | 9.88293e-33 | 1.22411e-31 |
| phagosome-lysosome fusion                                                                               | 1.21521e-32 | 1.50234e-31 |
| DNA deamination                                                                                         | 1.29291e-32 | 1.59540e-31 |
| regulation of lysosomal protein catabolic process                                                       | 1.31361e-32 | 1.61942e-31 |
| mismatch repair                                                                                         | 1.32715e-32 | 1.63458e-31 |
| positive regulation of I-kappaB phosphorylation                                                         | 1.70580e-32 | 2.09701e-31 |
| negative regulation of histone deacetylation                                                            | 1.94367e-32 | 2.38721e-31 |
| NADPH oxidation                                                                                         | 2.24946e-32 | 2.76021e-31 |
| receptor transactivation                                                                                | 3.52964e-32 | 4.31495e-31 |
| medial motor column neuron differentiation                                                              | 3.62242e-32 | 4.42426e-31 |
| protein localization to bicellular tight junction                                                       | 5.33317e-32 | 6.49560e-31 |
| methotrexate transport                                                                                  | 5.50666e-32 | 6.70071e-31 |
| mitochondrial tRNA thio-modification                                                                    | 5.64450e-32 | 6.86208e-31 |
| epinephrine biosynthetic process                                                                        | 5.93574e-32 | 7.20283e-31 |
| chemical homeostasis within a tissue                                                                    | 6.41740e-32 | 7.77297e-31 |
| positive regulation of integrin-mediated signaling pathway                                              | 8.65624e-32 | 1.04751e-30 |
| reduced folate transmembrane transport                                                                  | 1.11915e-31 | 1.35058e-30 |
| atrioventricular node development                                                                       | 1.45366e-31 | 1.75105e-30 |
| regulation of sodium:proton antiporter activity                                                         | 1.68962e-31 | 2.02416e-30 |
| attachment of mitotic spindle microtubules to kinetochore                                               | 2.33879e-31 | 2.79423e-30 |
| negative regulation of cargo loading into COPII-coated vesicle                                          | 2.34047e-31 | 2.79370e-30 |
| endocannabinoid signaling pathway                                                                       | 2.72413e-31 | 3.23404e-30 |
| retrograde trans-synaptic signaling by endocannabinoid                                                  | 2.72413e-31 | 3.23404e-30 |
| isopentenyl diphosphate biosynthetic process, mevalonate pathway                                        | 3.61356e-31 | 4.26685e-30 |
| regulation of vascular smooth muscle cell dedifferentiation                                             | 3.68432e-31 | 4.34261e-30 |
| glucose catabolic process                                                                               | 4.80204e-31 | 5.63479e-30 |
| metanephric tubule formation                                                                            | 5.21880e-31 | 6.11837e-30 |
| peptidyl-serine dephosphorylation                                                                       | 5.24728e-31 | 6.14628e-30 |
| regulation of gastric acid secretion                                                                    | 7.88132e-31 | 9.20700e-30 |
| neurotransmitter biosynthetic process                                                                   | 8.12796e-31 | 9.48670e-30 |
| regulation of systemic arterial blood pressure by endothelin                                            | 1.05298e-30 | 1.22358e-29 |
| negative regulation of interleukin-4 biosynthetic process                                               | 1.22562e-30 | 1.42042e-29 |
| negative regulation of mast cell differentiation                                                        | 1.22562e-30 | 1.42042e-29 |
| mitochondrial respiratory chain complex III assembly                                                    | 1.36484e-30 | 1.57899e-29 |
| aldosterone biosynthetic process                                                                        | 1.41269e-30 | 1.63291e-29 |
| cortisol biosynthetic process                                                                           | 1.41269e-30 | 1.63291e-29 |
| cell migration involved in endocardial cushion formation                                                | 1.52830e-30 | 1.76344e-29 |
| proteoglycan catabolic process                                                                          | 1.68514e-30 | 1.93931e-29 |
| pronephric field specification                                                                          | 2.42989e-30 | 2.78421e-29 |
| negative regulation of mesenchymal cell apoptotic process involved in metanephric nephron morphogenesis | 2.42989e-30 | 2.78421e-29 |
| negative regulation of apoptotic process involved in metanephric collecting duct development            | 2.42989e-30 | 2.78421e-29 |
| negative regulation of apoptotic process involved in metanephric nephron tubule development             | 2.42989e-30 | 2.78421e-29 |
| positive regulation of metanephric DCT cell differentiation                                             | 2.42989e-30 | 2.78421e-29 |
| proline catabolic process to glutamate                                                                  | 2.45850e-30 | 2.80478e-29 |
| skeletal muscle contraction                                                                             | 2.88733e-30 | 3.28831e-29 |
| syncytiotrophoblast cell differentiation involved in labyrinthine layer development                     | 2.93991e-30 | 3.34530e-29 |
| positive regulation of chemokine (C-X-C motif) ligand 1 production                                      | 3.37932e-30 | 3.83534e-29 |
| positive regulation of protein localization to presynapse                                               | 3.52767e-30 | 4.00026e-29 |
| histidine catabolic process to glutamate and formamide                                                  | 4.52703e-30 | 5.12467e-29 |
| histidine catabolic process to glutamate and formate                                                    | 4.52703e-30 | 5.12467e-29 |
| positive regulation of synaptic plasticity                                                              | 4.73440e-30 | 5.35019e-29 |
| response to nickel cation                                                                               | 5.63619e-30 | 6.35835e-29 |
| regulation of interleukin-10 secretion                                                                  | 7.53223e-30 | 8.47553e-29 |
| blood vessel endothelial cell delamination                                                              | 8.55844e-30 | 9.59742e-29 |
| negative regulation of brown fat cell differentiation                                                   | 8.55844e-30 | 9.59742e-29 |
| signal transduction involved in regulation of aerobic respiration                                       | 8.55844e-30 | 9.59742e-29 |
| midbrain-hindbrain boundary development                                                                 | 9.05583e-30 | 1.01293e-28 |
| hormonal regulation of the force of heart contraction                                                   | 9.45437e-30 | 1.05661e-28 |
| inositol phosphate biosynthetic process                                                                 | 9.69632e-30 | 1.08273e-28 |
| negative regulation of microvillus assembly                                                             | 9.85385e-30 | 1.09938e-28 |
| immunoglobulin secretion involved in immune response                                                    | 1.22886e-29 | 1.36639e-28 |
| positive regulation of mammary gland epithelial cell proliferation                                      | 1.33910e-29 | 1.48772e-28 |
| regulation of mast cell differentiation                                                                 | 1.37422e-29 | 1.52544e-28 |
| pyrimidine nucleotide catabolic process                                                                 | 1.59556e-29 | 1.76815e-28 |
| SNARE complex assembly                                                                                  | 1.77465e-29 | 1.95837e-28 |
| high-density lipoprotein particle remodeling                                                            | 1.86785e-29 | 2.05776e-28 |
| negative regulation of mast cell degranulation                                                          | 2.04870e-29 | 2.25134e-28 |

|                                                                                        |             |             |
|----------------------------------------------------------------------------------------|-------------|-------------|
| mitochondrial respiratory chain complex III biogenesis                                 | 2.28659e-29 | 2.51067e-28 |
| regulation of ceramide biosynthetic process                                            | 2.53751e-29 | 2.77922e-28 |
| pyrimidine deoxyribonucleotide catabolic process                                       | 2.70489e-29 | 2.96008e-28 |
| insulin secretion involved in cellular response to glucose stimulus                    | 2.82771e-29 | 3.09191e-28 |
| positive regulation of relaxation of muscle                                            | 3.16948e-29 | 3.45986e-28 |
| regulation of skeletal muscle fiber differentiation                                    | 4.43024e-29 | 4.82013e-28 |
| uterine epithelium development                                                         | 5.17176e-29 | 5.59912e-28 |
| nephric duct elongation                                                                | 5.17176e-29 | 5.59912e-28 |
| horizontal cell localization                                                           | 5.17176e-29 | 5.59912e-28 |
| nuclear fragmentation involved in apoptotic nuclear change                             | 5.26304e-29 | 5.68391e-28 |
| cellular response to progesterone stimulus                                             | 5.67616e-29 | 6.12002e-28 |
| monoubiquitinated histone H2A deubiquitination                                         | 5.96242e-29 | 6.42340e-28 |
| positive regulation of phospholipid catabolic process                                  | 6.18552e-29 | 6.65829e-28 |
| positive regulation of sodium:proton antiporter activity                               | 6.48668e-29 | 6.97676e-28 |
| isopentenyl diphosphate biosynthetic process                                           | 6.71481e-29 | 7.21623e-28 |
| potassium ion export                                                                   | 8.79193e-29 | 9.43304e-28 |
| cellular response to vitamin K                                                         | 9.06399e-29 | 9.71701e-28 |
| metanephric loop of Henle development                                                  | 9.33332e-29 | 9.98946e-28 |
| negative regulation of ATPase activity                                                 | 9.55661e-29 | 1.02201e-27 |
| DNA cytosine deamination                                                               | 1.17699e-28 | 1.25666e-27 |
| gas homeostasis                                                                        | 1.23615e-28 | 1.31876e-27 |
| optic chiasma development                                                              | 2.08066e-28 | 2.20362e-27 |
| positive regulation of optic nerve formation                                           | 2.08066e-28 | 2.20362e-27 |
| corticotropin secretion                                                                | 2.35606e-28 | 2.47932e-27 |
| arterial endothelial cell fate commitment                                              | 2.37278e-28 | 2.49493e-27 |
| DNA methylation involved in gamete generation                                          | 2.45225e-28 | 2.57643e-27 |
| pyruvate biosynthetic process                                                          | 2.66033e-28 | 2.78614e-27 |
| prechordal plate formation                                                             | 3.27945e-28 | 3.42364e-27 |
| midbrain-hindbrain boundary initiation                                                 | 3.27945e-28 | 3.42364e-27 |
| mitochondrial calcium release                                                          | 3.65787e-28 | 3.81264e-27 |
| osteoclast development                                                                 | 4.57396e-28 | 4.75244e-27 |
| nuclear inner membrane organization                                                    | 4.93682e-28 | 5.12541e-27 |
| central nervous system myelin maintenance                                              | 5.01802e-28 | 5.20560e-27 |
| positive regulation of interferon-gamma biosynthetic process                           | 5.08518e-28 | 5.27112e-27 |
| positive regulation of dendritic cell differentiation                                  | 5.39482e-28 | 5.58767e-27 |
| deoxyribonucleotide catabolic process                                                  | 5.50224e-28 | 5.69445e-27 |
| polyamine biosynthetic process                                                         | 5.50692e-28 | 5.69482e-27 |
| negative regulation of fat cell proliferation                                          | 5.85801e-28 | 6.05312e-27 |
| transcriptional activation by promoter-enhancer looping                                | 6.44636e-28 | 6.65584e-27 |
| pyridoxal phosphate metabolic process                                                  | 6.76508e-28 | 6.97397e-27 |
| regulation of apoptotic process involved in morphogenesis                              | 9.69346e-28 | 9.95376e-27 |
| negative regulation of renal sodium excretion                                          | 9.90069e-28 | 1.01586e-26 |
| optic nerve structural organization                                                    | 1.16891e-27 | 1.19749e-26 |
| medium-chain fatty-acyl-CoA catabolic process                                          | 1.22995e-27 | 1.25905e-26 |
| long-chain fatty-acyl-CoA catabolic process                                            | 1.22995e-27 | 1.25905e-26 |
| palmitic acid biosynthetic process                                                     | 1.22995e-27 | 1.25905e-26 |
| positive regulation of gamma-aminobutyric acid secretion                               | 1.23238e-27 | 1.25859e-26 |
| constitutive secretory pathway                                                         | 1.26218e-27 | 1.28704e-26 |
| base-excision repair, gap-filling                                                      | 1.28892e-27 | 1.31328e-26 |
| regulation of gamma-aminobutyric acid secretion                                        | 1.33491e-27 | 1.35804e-26 |
| positive regulation of CD8-positive, alpha-beta cytotoxic T cell extravasation         | 1.38624e-27 | 1.40916e-26 |
| cytidine deamination                                                                   | 1.82902e-27 | 1.85069e-26 |
| positive regulation of metanephric glomerulus development                              | 2.18461e-27 | 2.20033e-26 |
| cilium movement involved in cell motility                                              | 2.55510e-27 | 2.57153e-26 |
| positive regulation of tumor necrosis factor secretion                                 | 2.59181e-27 | 2.60647e-26 |
| positive regulation of deoxyribonuclease activity                                      | 2.85190e-27 | 2.86366e-26 |
| regulation of neurotrophin production                                                  | 2.91299e-27 | 2.91831e-26 |
| arterial endothelial cell differentiation                                              | 3.30666e-27 | 3.30014e-26 |
| calcium-mediated signaling using extracellular calcium source                          | 3.91051e-27 | 3.89393e-26 |
| lymphocyte migration into lymphoid organs                                              | 4.40280e-27 | 4.37420e-26 |
| S-shaped body morphogenesis                                                            | 4.98749e-27 | 4.94390e-26 |
| esophagus smooth muscle contraction                                                    | 5.59189e-27 | 5.53050e-26 |
| regulation of phosphatidylcholine biosynthetic process                                 | 6.24097e-27 | 6.16319e-26 |
| polyamine metabolic process                                                            | 6.68101e-27 | 6.59280e-26 |
| cellular response to granulocyte macrophage colony-stimulating factor stimulus         | 8.09850e-27 | 7.95576e-26 |
| negative regulation of lymphangiogenesis                                               | 8.29952e-27 | 8.14716e-26 |
| negative regulation of cell differentiation involved in embryonic placenta development | 1.00681e-26 | 9.87590e-26 |
| positive regulation of endodeoxyribonuclease activity                                  | 1.06484e-26 | 1.04374e-25 |
| apoptotic nuclear changes                                                              | 1.08018e-26 | 1.05799e-25 |
| actin filament depolymerization                                                        | 1.20516e-26 | 1.17864e-25 |
| viral budding                                                                          | 1.27002e-26 | 1.24023e-25 |
| regulation of dendritic cell differentiation                                           | 1.27930e-26 | 1.24836e-25 |

|                                                                                                                         |             |             |
|-------------------------------------------------------------------------------------------------------------------------|-------------|-------------|
| metanephric nephron tubule morphogenesis                                                                                | 1.32087e-26 | 1.28797e-25 |
| growth plate cartilage chondrocyte differentiation                                                                      | 1.37600e-26 | 1.33974e-25 |
| negative regulation of nodal signaling pathway                                                                          | 1.43373e-26 | 1.39492e-25 |
| growth plate cartilage chondrocyte morphogenesis                                                                        | 1.53399e-26 | 1.49026e-25 |
| chondrocyte development involved in endochondral bone morphogenesis                                                     | 1.67285e-26 | 1.62277e-25 |
| Wnt signaling pathway involved in wound healing, spreading of epidermal cells                                           | 2.05521e-26 | 1.98781e-25 |
| positive regulation of excitatory synapse assembly                                                                      | 2.05521e-26 | 1.98781e-25 |
| isocitrate metabolic process                                                                                            | 2.10326e-26 | 2.03129e-25 |
| vascular endothelial growth factor receptor-2 signaling pathway                                                         | 2.73088e-26 | 2.63358e-25 |
| positive regulation of gluconeogenesis by positive regulation of transcription from RNA polymerase II promoter          | 2.92842e-26 | 2.81995e-25 |
| cellular response to acidic pH                                                                                          | 2.96100e-26 | 2.84923e-25 |
| aflatoxin B1 metabolic process                                                                                          | 3.42384e-26 | 3.29219e-25 |
| activation of phospholipase D activity                                                                                  | 3.66534e-26 | 3.51926e-25 |
| uropod organization                                                                                                     | 3.91419e-26 | 3.75546e-25 |
| spinal cord ventral commissure morphogenesis                                                                            | 4.21176e-26 | 4.03507e-25 |
| smooth muscle hyperplasia                                                                                               | 4.26189e-26 | 4.07716e-25 |
| response to acidic pH                                                                                                   | 4.34939e-26 | 4.15784e-25 |
| positive regulation of epithelial cell differentiation involved in kidney development                                   | 4.71122e-26 | 4.50046e-25 |
| serine transport                                                                                                        | 6.18769e-26 | 5.89803e-25 |
| actin filament reorganization involved in cell cycle                                                                    | 6.20786e-26 | 5.91298e-25 |
| establishment of protein localization to chromatin                                                                      | 6.95570e-26 | 6.61571e-25 |
| negative regulation of phosphoprotein phosphatase activity                                                              | 8.20002e-26 | 7.77671e-25 |
| metanephric glomerular mesangial cell development                                                                       | 8.65987e-26 | 8.20691e-25 |
| positive regulation of vascular smooth muscle cell dedifferentiation                                                    | 8.65987e-26 | 8.20691e-25 |
| oxygen homeostasis                                                                                                      | 9.22289e-26 | 8.72163e-25 |
| calcineurin-NFAT signaling cascade                                                                                      | 9.29772e-26 | 8.78608e-25 |
| regulation of RNA polymerase II regulatory region sequence-specific DNA binding                                         | 9.62177e-26 | 9.08577e-25 |
| taurine transport                                                                                                       | 1.02981e-25 | 9.71745e-25 |
| cellular response to mycophenolic acid                                                                                  | 1.14934e-25 | 1.08298e-24 |
| vesicle-mediated cholesterol transport                                                                                  | 2.15987e-25 | 2.02935e-24 |
| regulation of CD8-positive, alpha-beta cytotoxic T cell extravasation                                                   | 2.26326e-25 | 2.12346e-24 |
| regulation of glycolytic process by positive regulation of transcription from RNA polymerase II promoter                | 2.41783e-25 | 2.26686e-24 |
| regulation of cellular ketone metabolic process by positive regulation of transcription from RNA polymerase II promoter | 2.41783e-25 | 2.26686e-24 |
| negative regulation of necrotic cell death                                                                              | 2.64397e-25 | 2.47184e-24 |
| dopamine biosynthetic process from tyrosine                                                                             | 2.93433e-25 | 2.73552e-24 |
| positive regulation of ceramide biosynthetic process                                                                    | 3.45796e-25 | 3.21002e-24 |
| phytosteroid biosynthetic process                                                                                       | 3.96875e-25 | 3.67381e-24 |
| positive regulation of ovarian follicle development                                                                     | 3.99504e-25 | 3.69556e-24 |
| regulation of lipid transport by positive regulation of transcription from RNA polymerase II promoter                   | 4.12155e-25 | 3.80722e-24 |
| establishment of lymphocyte polarity                                                                                    | 4.38914e-25 | 4.04589e-24 |
| negative regulation of mesenchymal cell apoptotic process involved in metanephros development                           | 4.45883e-25 | 4.10437e-24 |
| macrophage homeostasis                                                                                                  | 4.49470e-25 | 4.13450e-24 |
| response to UV-A                                                                                                        | 4.67764e-25 | 4.29977e-24 |
| positive regulation of SUMO transferase activity                                                                        | 5.06532e-25 | 4.65288e-24 |
| cerebellar molecular layer morphogenesis                                                                                | 5.69125e-25 | 5.22055e-24 |
| negative regulation of reactive oxygen species biosynthetic process                                                     | 5.69684e-25 | 5.22204e-24 |
| deoxyribose phosphate catabolic process                                                                                 | 5.72318e-25 | 5.24253e-24 |
| high-density lipoprotein particle clearance                                                                             | 5.97832e-25 | 5.46482e-24 |
| epinephrine metabolic process                                                                                           | 6.22651e-25 | 5.67986e-24 |
| marginal zone B cell differentiation                                                                                    | 6.71289e-25 | 6.10659e-24 |
| embryonic ectodermal digestive tract development                                                                        | 6.80316e-25 | 6.18017e-24 |
| inositol phosphate dephosphorylation                                                                                    | 7.25913e-25 | 6.58983e-24 |
| response to vitamin B2                                                                                                  | 7.34396e-25 | 6.66224e-24 |
| heterochromatin maintenance                                                                                             | 7.34396e-25 | 6.66224e-24 |
| coenzyme A biosynthetic process                                                                                         | 8.38781e-25 | 7.58304e-24 |
| cleavage furrow ingression                                                                                              | 9.21255e-25 | 8.32294e-24 |
| CD4-positive, alpha-beta T cell lineage commitment                                                                      | 1.07904e-24 | 9.72167e-24 |
| negative regulation of phosphatidylinositol 3-kinase activity                                                           | 1.09164e-24 | 9.82851e-24 |
| negative regulation of actin filament severing                                                                          | 1.19311e-24 | 1.07274e-23 |
| sensory perception of sweet taste                                                                                       | 1.46170e-24 | 1.31064e-23 |
| brush border assembly                                                                                                   | 1.46884e-24 | 1.31615e-23 |
| regulation of uterine smooth muscle contraction                                                                         | 1.61194e-24 | 1.44143e-23 |
| response to fungicide                                                                                                   | 1.66198e-24 | 1.48517e-23 |
| positive regulation of protein processing in phagocytic vesicle                                                         | 1.98872e-24 | 1.77114e-23 |
| positive regulation of heterotypic cell-cell adhesion                                                                   | 2.01163e-24 | 1.79032e-23 |
| cortical microtubule organization                                                                                       | 2.02517e-24 | 1.80116e-23 |

|                                                                                                      |             |             |
|------------------------------------------------------------------------------------------------------|-------------|-------------|
| pyrimidine ribonucleoside catabolic process                                                          | 2.27300e-24 | 2.01748e-23 |
| metanephric glomerular mesangium development                                                         | 2.55674e-24 | 2.26626e-23 |
| cellular response to interleukin-11                                                                  | 2.85053e-24 | 2.52327e-23 |
| regulation of pinocytosis                                                                            | 3.79525e-24 | 3.34827e-23 |
| positive regulation of phospholipid scramblase activity                                              | 4.08105e-24 | 3.59800e-23 |
| positive regulation of glucosylceramide catabolic process                                            | 4.08105e-24 | 3.59800e-23 |
| positive regulation of sphingomyelin catabolic process                                               | 4.08105e-24 | 3.59800e-23 |
| putrescine biosynthetic process from ornithine                                                       | 4.73892e-24 | 4.15571e-23 |
| regulation of skeletal muscle tissue growth                                                          | 5.19644e-24 | 4.55390e-23 |
| lung vasculature development                                                                         | 5.44159e-24 | 4.75922e-23 |
| mitotic DNA replication initiation                                                                   | 8.09750e-24 | 7.04927e-23 |
| desmosome organization                                                                               | 9.36739e-24 | 8.13862e-23 |
| positive regulation of phospholipid efflux                                                           | 9.85004e-24 | 8.54667e-23 |
| hypoglossal nerve morphogenesis                                                                      | 1.31689e-23 | 1.13514e-22 |
| Sertoli cell fate commitment                                                                         | 1.33075e-23 | 1.14635e-22 |
| phosphorylated carbohydrate dephosphorylation                                                        | 1.37529e-23 | 1.18394e-22 |
| GDP-mannose biosynthetic process                                                                     | 1.42482e-23 | 1.22578e-22 |
| cellular hypotonic salinity response                                                                 | 1.72508e-23 | 1.48022e-22 |
| L-serine transport                                                                                   | 1.87249e-23 | 1.60461e-22 |
| right lung development                                                                               | 2.07113e-23 | 1.77137e-22 |
| citrate transport                                                                                    | 2.16527e-23 | 1.84948e-22 |
| response to mercury ion                                                                              | 2.37209e-23 | 2.02351e-22 |
| negative regulation of actin nucleation                                                              | 2.65923e-23 | 2.26698e-22 |
| xylulose metabolic process                                                                           | 3.12432e-23 | 2.65830e-22 |
| vasopressin secretion                                                                                | 3.82367e-23 | 3.23867e-22 |
| thymus epithelium morphogenesis                                                                      | 4.67482e-23 | 3.94943e-22 |
| positive regulation of relaxation of cardiac muscle                                                  | 5.39050e-23 | 4.54821e-22 |
| negative regulation of cytolysis                                                                     | 5.48809e-23 | 4.62462e-22 |
| brassinosteroid biosynthetic process                                                                 | 5.66582e-23 | 4.77133e-22 |
| T-helper cell lineage commitment                                                                     | 5.87670e-23 | 4.94575e-22 |
| zonula adherens maintenance                                                                          | 5.99192e-23 | 5.03627e-22 |
| positive regulation of arachidonic acid secretion                                                    | 5.99686e-23 | 5.03721e-22 |
| regulation of lymphoid progenitor cell differentiation                                               | 6.41116e-23 | 5.37834e-22 |
| cellular response to fluoride                                                                        | 7.47144e-23 | 6.25584e-22 |
| delamination                                                                                         | 8.65943e-23 | 7.23214e-22 |
| anterograde axonal protein transport                                                                 | 1.13341e-22 | 9.44199e-22 |
| regulation of microtubule nucleation                                                                 | 1.14986e-22 | 9.57296e-22 |
| negative regulation of transcription of nuclear large rRNA transcript from RNA polymerase I promoter | 1.36384e-22 | 1.13472e-21 |
| cellular response to carbon monoxide                                                                 | 1.55855e-22 | 1.29426e-21 |
| positive regulation of sodium:potassium-exchanging ATPase activity                                   | 1.55855e-22 | 1.29426e-21 |
| negative regulation of protein homooligomerization                                                   | 1.56368e-22 | 1.29689e-21 |
| regulation of myosin II filament organization                                                        | 1.57296e-22 | 1.30376e-21 |
| terpene metabolic process                                                                            | 1.76259e-22 | 1.45910e-21 |
| epithelial cell apoptotic process involved in palatal shelf morphogenesis                            | 1.89231e-22 | 1.56550e-21 |
| macrophage colony-stimulating factor signaling pathway                                               | 2.11270e-22 | 1.74454e-21 |
| apoptotic chromosome condensation                                                                    | 2.16713e-22 | 1.78836e-21 |
| interleukin-18-mediated signaling pathway                                                            | 2.57420e-22 | 2.12029e-21 |
| lipid tube assembly                                                                                  | 2.62464e-22 | 2.16048e-21 |
| positive regulation of macrophage inflammatory protein 1 alpha production                            | 2.65909e-22 | 2.18611e-21 |
| cellular lactam catabolic process                                                                    | 3.21722e-22 | 2.64165e-21 |
| axial mesoderm morphogenesis                                                                         | 3.34900e-22 | 2.74643e-21 |
| positive regulation of cardiac muscle contraction                                                    | 3.46438e-22 | 2.83928e-21 |
| regulation of dendritic cell apoptotic process                                                       | 3.60600e-22 | 2.94983e-21 |
| negative regulation of testosterone biosynthetic process                                             | 3.71636e-22 | 3.03822e-21 |
| phosphatidylglycerol acyl-chain remodeling                                                           | 3.71880e-22 | 3.03833e-21 |
| negative regulation of T-helper 17 cell differentiation                                              | 4.04916e-22 | 3.30209e-21 |
| detection of chemical stimulus involved in sensory perception of sweet taste                         | 4.20990e-22 | 3.43104e-21 |
| negative regulation of beta-amyloid clearance                                                        | 4.36446e-22 | 3.55480e-21 |
| negative regulation of membrane depolarization                                                       | 4.49771e-22 | 3.66107e-21 |
| metanephric distal tubule morphogenesis                                                              | 4.68225e-22 | 3.80892e-21 |
| positive regulation of interleukin-13 secretion                                                      | 4.72520e-22 | 3.84149e-21 |
| peptidyl-histidine hydroxylation                                                                     | 4.75853e-22 | 3.86620e-21 |
| peptidyl-asparagine hydroxylation                                                                    | 4.75853e-22 | 3.86620e-21 |
| regulation of MyD88-dependent toll-like receptor signaling pathway                                   | 5.37710e-22 | 4.36069e-21 |
| clathrin-coated pit assembly                                                                         | 5.79615e-22 | 4.69763e-21 |
| cellular response to mercury ion                                                                     | 6.00636e-22 | 4.86501e-21 |
| positive regulation of fibronectin-dependent thymocyte migration                                     | 6.41386e-22 | 5.18549e-21 |
| uterus morphogenesis                                                                                 | 6.43268e-22 | 5.19751e-21 |
| sensory perception of umami taste                                                                    | 6.53775e-22 | 5.27916e-21 |
| mRNA 5'-splice site recognition                                                                      | 6.55902e-22 | 5.29309e-21 |
| midbrain-hindbrain boundary morphogenesis                                                            | 7.32642e-22 | 5.90151e-21 |

|                                                                                                            |             |             |
|------------------------------------------------------------------------------------------------------------|-------------|-------------|
| regulation of axon diameter                                                                                | 7.44857e-22 | 5.99624e-21 |
| oligosaccharide catabolic process                                                                          | 7.45334e-22 | 5.99640e-21 |
| regulation of lipid transport by regulation of transcription from RNA polymerase II promoter               | 8.12977e-22 | 6.52465e-21 |
| multicellular organismal lipid catabolic process                                                           | 8.44697e-22 | 6.77096e-21 |
| regulation of muscle filament sliding speed                                                                | 8.75535e-22 | 7.00961e-21 |
| establishment of T cell polarity                                                                           | 8.90813e-22 | 7.12759e-21 |
| smooth muscle adaptation                                                                                   | 9.29381e-22 | 7.43166e-21 |
| reverse cholesterol transport                                                                              | 9.32427e-22 | 7.45148e-21 |
| putrescine biosynthetic process                                                                            | 9.47416e-22 | 7.56667e-21 |
| proline catabolic process                                                                                  | 9.98262e-22 | 7.96310e-21 |
| regulation of ovarian follicle development                                                                 | 1.02362e-21 | 8.16039e-21 |
| epidermal growth factor-activated receptor transactivation by G-protein coupled receptor signaling pathway | 1.16733e-21 | 9.29487e-21 |
| intracellular cholesterol transport                                                                        | 1.18161e-21 | 9.40286e-21 |
| tRNA wobble uridine modification                                                                           | 1.19495e-21 | 9.50324e-21 |
| phenol-containing compound catabolic process                                                               | 1.26823e-21 | 1.00799e-20 |
| negative regulation of transcription from RNA polymerase III promoter                                      | 1.31494e-21 | 1.04449e-20 |
| apoptotic process involved in blood vessel morphogenesis                                                   | 1.37553e-21 | 1.09130e-20 |
| establishment or maintenance of cytoskeleton polarity                                                      | 1.40254e-21 | 1.11139e-20 |
| immature T cell proliferation in thymus                                                                    | 1.57481e-21 | 1.24490e-20 |
| negative regulation of testicular blood vessel morphogenesis                                               | 1.57481e-21 | 1.24490e-20 |
| negative regulation of male gonad development                                                              | 1.57481e-21 | 1.24490e-20 |
| positive regulation of cortisol biosynthetic process                                                       | 1.57481e-21 | 1.24490e-20 |
| cardiolipin biosynthetic process                                                                           | 1.62628e-21 | 1.28250e-20 |
| detection of wounding                                                                                      | 1.70725e-21 | 1.34554e-20 |
| lateral mesodermal cell differentiation                                                                    | 1.70725e-21 | 1.34554e-20 |
| embryonic ectodermal digestive tract morphogenesis                                                         | 1.70725e-21 | 1.34554e-20 |
| branching involved in open tracheal system development                                                     | 1.70725e-21 | 1.34554e-20 |
| right lung morphogenesis                                                                                   | 1.70725e-21 | 1.34554e-20 |
| response to pyrethroid                                                                                     | 1.71207e-21 | 1.34531e-20 |
| positive regulation of insulin receptor signaling pathway                                                  | 1.83141e-21 | 1.43737e-20 |
| actin filament severing                                                                                    | 1.88899e-21 | 1.48080e-20 |
| negative regulation of lipid kinase activity                                                               | 1.98358e-21 | 1.55217e-20 |
| pyridoxal 5'-phosphate salvage                                                                             | 2.34012e-21 | 1.82573e-20 |
| histone H3-K79 methylation                                                                                 | 2.47289e-21 | 1.92590e-20 |
| positive regulation of cyclic-nucleotide phosphodiesterase activity                                        | 2.71746e-21 | 2.11262e-20 |
| inositol trisphosphate biosynthetic process                                                                | 2.72731e-21 | 2.11902e-20 |
| histone H3-K27 methylation                                                                                 | 2.94047e-21 | 2.28195e-20 |
| alveolar primary septum development                                                                        | 2.98149e-21 | 2.31105e-20 |
| positive regulation of peptidyl-tyrosine autophosphorylation                                               | 3.12724e-21 | 2.41833e-20 |
| chromatin reprogramming in the zygote                                                                      | 3.44136e-21 | 2.65967e-20 |
| regulation of receptor catabolic process                                                                   | 3.56325e-21 | 2.75064e-20 |
| protein esterification                                                                                     | 3.59274e-21 | 2.77178e-20 |
| intestinal lipid catabolic process                                                                         | 3.59274e-21 | 2.77178e-20 |
| transcription, RNA-templated                                                                               | 3.69908e-21 | 2.85048e-20 |
| positive regulation of transcription of nuclear large rRNA transcript from RNA polymerase I promoter       | 3.77461e-21 | 2.90698e-20 |
| fibroblast growth factor receptor apoptotic signaling pathway                                              | 3.83900e-21 | 2.95484e-20 |
| interleukin-12 production                                                                                  | 4.12567e-21 | 3.16807e-20 |
| negative regulation of necroptotic process                                                                 | 4.73056e-21 | 3.62410e-20 |
| regulation of chromatin silencing at telomere                                                              | 4.85798e-21 | 3.71955e-20 |
| regulation of macrophage inflammatory protein 1 alpha production                                           | 4.86762e-21 | 3.72477e-20 |
| lipid glycosylation                                                                                        | 4.98088e-21 | 3.80921e-20 |
| xylulose biosynthetic process                                                                              | 5.00722e-21 | 3.82714e-20 |
| embryonic cleavage                                                                                         | 5.22505e-21 | 3.98899e-20 |
| positive regulation of DNA demethylation                                                                   | 5.30169e-21 | 4.04515e-20 |
| tail-anchored membrane protein insertion into ER membrane                                                  | 5.85584e-21 | 4.45763e-20 |
| negative regulation of matrix metalloproteinase secretion                                                  | 5.88195e-21 | 4.47491e-20 |
| hepoxilin biosynthetic process                                                                             | 6.01273e-21 | 4.56912e-20 |
| negative regulation of Arp2/3 complex-mediated actin nucleation                                            | 6.86002e-21 | 5.20696e-20 |
| modulation by virus of host immune response                                                                | 7.41601e-21 | 5.61925e-20 |
| chronological cell aging                                                                                   | 7.54344e-21 | 5.71252e-20 |
| semaphorin-plexin signaling pathway involved in bone trabecula morphogenesis                               | 7.89960e-21 | 5.97535e-20 |
| positive regulation of opsonization                                                                        | 7.94469e-21 | 6.00600e-20 |
| cellular response to electrical stimulus                                                                   | 7.98259e-21 | 6.03119e-20 |
| regulation of pro-B cell differentiation                                                                   | 9.05885e-21 | 6.82866e-20 |
| RNA folding                                                                                                | 1.16825e-20 | 8.79132e-20 |
| TORC2 signaling                                                                                            | 1.21044e-20 | 9.09839e-20 |
| regulation of synaptic vesicle fusion to presynaptic membrane                                              | 1.26871e-20 | 9.53092e-20 |
| iodide transport                                                                                           | 1.38115e-20 | 1.03519e-19 |
| positive regulation of superoxide anion generation                                                         | 1.48135e-20 | 1.10840e-19 |
| protein hexamerization                                                                                     | 1.94136e-20 | 1.44766e-19 |
| maintenance of protein location in nucleus                                                                 | 1.95690e-20 | 1.45842e-19 |

|                                                                                                             |             |             |
|-------------------------------------------------------------------------------------------------------------|-------------|-------------|
| DNA demethylation of male pronucleus                                                                        | 2.09505e-20 | 1.55961e-19 |
| cellular amide catabolic process                                                                            | 2.09553e-20 | 1.55909e-19 |
| AV node cell action potential                                                                               | 2.18947e-20 | 1.62805e-19 |
| rhythmic synaptic transmission                                                                              | 2.32184e-20 | 1.72551e-19 |
| termination of signal transduction                                                                          | 2.58594e-20 | 1.91421e-19 |
| histone H4-K16 acetylation                                                                                  | 2.73428e-20 | 2.02174e-19 |
| putrescine metabolic process                                                                                | 2.76609e-20 | 2.04411e-19 |
| response to genistein                                                                                       | 2.81424e-20 | 2.07853e-19 |
| negative regulation of cholesterol storage                                                                  | 3.00383e-20 | 2.21731e-19 |
| neuropeptide catabolic process                                                                              | 3.27243e-20 | 2.41287e-19 |
| regulation of histone ubiquitination                                                                        | 3.91684e-20 | 2.87672e-19 |
| maintenance of protein location in mitochondrion                                                            | 4.03277e-20 | 2.96022e-19 |
| negative regulation of mitochondrial depolarization                                                         | 4.79227e-20 | 3.51576e-19 |
| negative regulation of hematopoietic progenitor cell differentiation                                        | 4.82856e-20 | 3.54040e-19 |
| rRNA 2'-O-methylation                                                                                       | 5.32155e-20 | 3.89753e-19 |
| protein deamination                                                                                         | 6.17895e-20 | 4.51293e-19 |
| B cell chemotaxis                                                                                           | 6.43031e-20 | 4.68871e-19 |
| synaptic vesicle budding from endosome                                                                      | 6.54206e-20 | 4.76755e-19 |
| DNA replication-dependent nucleosome assembly                                                               | 6.61865e-20 | 4.81803e-19 |
| sperm axoneme assembly                                                                                      | 9.60620e-20 | 6.97351e-19 |
| mitochondrial tRNA modification                                                                             | 1.00356e-19 | 7.27719e-19 |
| follicular B cell differentiation                                                                           | 1.03094e-19 | 7.47162e-19 |
| metanephric proximal tubule development                                                                     | 1.17950e-19 | 8.54355e-19 |
| positive regulation of transdifferentiation                                                                 | 1.22310e-19 | 8.84478e-19 |
| negative regulation of production of siRNA involved in RNA interference                                     | 1.22310e-19 | 8.84478e-19 |
| response to caloric restriction                                                                             | 1.24167e-19 | 8.95936e-19 |
| spongiotrophoblast differentiation                                                                          | 1.28966e-19 | 9.30052e-19 |
| neurotransmitter receptor transport                                                                         | 1.32447e-19 | 9.54112e-19 |
| negative regulation of nitric oxide biosynthetic process                                                    | 1.59658e-19 | 1.14636e-18 |
| tRNA wobble base modification                                                                               | 1.67478e-19 | 1.20055e-18 |
| regulation of lens fiber cell differentiation                                                               | 1.67710e-19 | 1.20156e-18 |
| maintenance of presynaptic active zone structure                                                            | 1.74865e-19 | 1.25077e-18 |
| evoked neurotransmitter secretion                                                                           | 1.74865e-19 | 1.25077e-18 |
| cellular response to nicotine                                                                               | 1.89472e-19 | 1.35305e-18 |
| female sex determination                                                                                    | 1.90638e-19 | 1.35990e-18 |
| vitamin transmembrane transport                                                                             | 1.94841e-19 | 1.38837e-18 |
| membrane depolarization during AV node cell action potential                                                | 2.23195e-19 | 1.58698e-18 |
| signal complex assembly                                                                                     | 2.26275e-19 | 1.60627e-18 |
| positive regulation of collagen fibril organization                                                         | 2.39985e-19 | 1.70268e-18 |
| negative regulation of epinephrine secretion                                                                | 2.76216e-19 | 1.95446e-18 |
| negative regulation of interleukin-6 secretion                                                              | 2.88356e-19 | 2.03708e-18 |
| microtubule severing                                                                                        | 2.91139e-19 | 2.05563e-18 |
| paraxial mesodermal cell fate commitment                                                                    | 2.93229e-19 | 2.06928e-18 |
| regulation of microvillus length                                                                            | 3.01152e-19 | 2.12405e-18 |
| regulation of cargo loading into COPII-coated vesicle                                                       | 3.34473e-19 | 2.35654e-18 |
| enzyme-directed rRNA 2'-O-methylation                                                                       | 3.49734e-19 | 2.46142e-18 |
| protein import into mitochondrial matrix                                                                    | 3.99839e-19 | 2.80805e-18 |
| fatty acid beta-oxidation using acyl-CoA dehydrogenase                                                      | 4.06898e-19 | 2.85610e-18 |
| histone H4-K5 acetylation                                                                                   | 4.42787e-19 | 3.10470e-18 |
| histone H4-K8 acetylation                                                                                   | 4.42787e-19 | 3.10470e-18 |
| regulation of cyclic-nucleotide phosphodiesterase activity                                                  | 4.57126e-19 | 3.20183e-18 |
| positive regulation of interleukin-12 secretion                                                             | 4.83944e-19 | 3.38787e-18 |
| notochord formation                                                                                         | 4.94013e-19 | 3.45652e-18 |
| pyridoxal phosphate biosynthetic process                                                                    | 5.96421e-19 | 4.15977e-18 |
| visceral mesoderm-endoderm interaction involved in midgut development                                       | 6.72535e-19 | 4.68566e-18 |
| neurotransmitter receptor transport, postsynaptic endosome to lysosome                                      | 7.21210e-19 | 5.01947e-18 |
| dADP catabolic process                                                                                      | 7.26943e-19 | 5.05669e-18 |
| dGDP catabolic process                                                                                      | 7.26943e-19 | 5.05669e-18 |
| GDP catabolic process                                                                                       | 7.26943e-19 | 5.05669e-18 |
| regulation of carbohydrate metabolic process by regulation of transcription from RNA polymerase II promoter | 8.93057e-19 | 6.18603e-18 |
| negative regulation of urine volume                                                                         | 9.32926e-19 | 6.45540e-18 |
| trans-synaptic signaling by trans-synaptic complex, modulating synaptic transmission                        | 9.44816e-19 | 6.53080e-18 |
| negative regulation of NMDA glutamate receptor activity                                                     | 9.44816e-19 | 6.53080e-18 |
| positive regulation of NMDA glutamate receptor activity                                                     | 9.44816e-19 | 6.53080e-18 |
| protein retention in ER lumen                                                                               | 1.07018e-18 | 7.37407e-18 |
| mitochondria-nucleus signaling pathway                                                                      | 1.09730e-18 | 7.55704e-18 |
| cellular response to laminar fluid shear stress                                                             | 1.21838e-18 | 8.38210e-18 |
| positive regulation of pinocytosis                                                                          | 1.22768e-18 | 8.44166e-18 |
| regulation of peptidyl-tyrosine autophosphorylation                                                         | 1.23044e-18 | 8.45181e-18 |
| positive regulation of mitochondrial translation                                                            | 1.30899e-18 | 8.97728e-18 |



|                                                                                                                     |             |             |
|---------------------------------------------------------------------------------------------------------------------|-------------|-------------|
| oviduct development                                                                                                 | 1.31320e-18 | 9.00147e-18 |
| attachment of spindle microtubules to kinetochore involved in meiotic sister chromatid segregation                  | 1.71569e-18 | 1.17176e-17 |
| negative regulation of ATF6-mediated unfolded protein response                                                      | 1.76268e-18 | 1.20323e-17 |
| cyclooxygenase pathway                                                                                              | 1.82333e-18 | 1.24398e-17 |
| negative regulation of natural killer cell mediated cytotoxicity                                                    | 1.94214e-18 | 1.32094e-17 |
| regulation of ventricular cardiac muscle cell membrane depolarization                                               | 2.03285e-18 | 1.38192e-17 |
| monoacylglycerol catabolic process                                                                                  | 2.29314e-18 | 1.55645e-17 |
| regulation of dermatome development                                                                                 | 2.47324e-18 | 1.67782e-17 |
| regulation of mitochondrial translation                                                                             | 2.84140e-18 | 1.92262e-17 |
| intermicrovillar adhesion                                                                                           | 2.84399e-18 | 1.92339e-17 |
| positive regulation of CD8-positive, alpha-beta T cell extravasation                                                | 2.85340e-18 | 1.92875e-17 |
| regulation of atrial cardiac muscle cell membrane depolarization                                                    | 3.62471e-18 | 2.44385e-17 |
| cyanate catabolic process                                                                                           | 3.71357e-18 | 2.49863e-17 |
| positive regulation of TRAIL biosynthetic process                                                                   | 4.03955e-18 | 2.71380e-17 |
| short-term synaptic potentiation                                                                                    | 4.22668e-18 | 2.83662e-17 |
| positive regulation of steroid hormone biosynthetic process                                                         | 4.50852e-18 | 3.02268e-17 |
| negative regulation of blood vessel endothelial cell proliferation involved in sprouting angiogenesis               | 4.53309e-18 | 3.03761e-17 |
| mineralocorticoid biosynthetic process                                                                              | 4.98256e-18 | 3.33370e-17 |
| regulation of metanephric glomerulus development                                                                    | 5.10590e-18 | 3.41449e-17 |
| negative regulation of heart induction by canonical Wnt signaling pathway                                           | 5.82202e-18 | 3.88746e-17 |
| Wnt signaling pathway involved in forebrain neuroblast division                                                     | 5.82202e-18 | 3.88746e-17 |
| positive regulation of mesodermal cell fate specification                                                           | 5.82202e-18 | 3.88746e-17 |
| calcium ion transmembrane transport via low voltage-gated calcium channel                                           | 5.82202e-18 | 3.88746e-17 |
| positive regulation of canonical Wnt signaling pathway involved in controlling type B pancreatic cell proliferation | 5.82202e-18 | 3.88746e-17 |
| iron-sulfur cluster assembly                                                                                        | 6.60442e-18 | 4.38539e-17 |
| regulation of histone H3-K9 dimethylation                                                                           | 6.63973e-18 | 4.40661e-17 |
| cellular response to salt stress                                                                                    | 6.72520e-18 | 4.46108e-17 |
| tRNA threonylcarbamoyladenosine metabolic process                                                                   | 6.83890e-18 | 4.53422e-17 |
| metanephric glomerular mesangial cell differentiation                                                               | 7.14962e-18 | 4.72831e-17 |
| regulation of interleukin-4 biosynthetic process                                                                    | 7.25382e-18 | 4.79000e-17 |
| mitotic cytokinetic process                                                                                         | 8.14417e-18 | 5.37253e-17 |
| maintenance of protein localization in endoplasmic reticulum                                                        | 8.45254e-18 | 5.57317e-17 |
| cholesterol biosynthetic process via desmosterol                                                                    | 8.92961e-18 | 5.88183e-17 |
| cholesterol biosynthetic process via lathosterol                                                                    | 8.92961e-18 | 5.88183e-17 |
| negative regulation of circadian sleep/wake cycle, non-REM sleep                                                    | 1.07761e-17 | 7.07683e-17 |
| negative regulation of mucus secretion                                                                              | 1.07761e-17 | 7.07683e-17 |
| Golgi to transport vesicle transport                                                                                | 1.12776e-17 | 7.39141e-17 |
| mitotic cleavage furrow ingression                                                                                  | 1.12776e-17 | 7.39141e-17 |
| positive regulation of neurotrophin production                                                                      | 1.35760e-17 | 8.85369e-17 |
| globoside metabolic process                                                                                         | 1.38515e-17 | 9.02440e-17 |
| positive regulation of exit from mitosis                                                                            | 1.44238e-17 | 9.38331e-17 |
| regulation of transcription from RNA polymerase II promoter involved in spinal cord motor neuron fate specification | 1.51056e-17 | 9.81715e-17 |
| regulation of tumor necrosis factor secretion                                                                       | 1.66414e-17 | 1.08046e-16 |
| retinol transport                                                                                                   | 1.99981e-17 | 1.29520e-16 |
| regulation of organelle transport along microtubule                                                                 | 2.03821e-17 | 1.31942e-16 |
| mRNA 3'-splice site recognition                                                                                     | 2.21492e-17 | 1.43100e-16 |
| response to cisplatin                                                                                               | 2.22352e-17 | 1.43585e-16 |
| positive regulation of long-term neuronal synaptic plasticity                                                       | 2.36057e-17 | 1.52211e-16 |
| negative regulation of oxidative phosphorylation                                                                    | 2.50303e-17 | 1.61080e-16 |
| olfactory learning                                                                                                  | 2.53051e-17 | 1.62769e-16 |
| positive regulation of activated T cell autonomous cell death                                                       | 2.60049e-17 | 1.67189e-16 |
| TRAIL-activated apoptotic signaling pathway                                                                         | 2.60976e-17 | 1.67703e-16 |
| positive regulation of lamellipodium morphogenesis                                                                  | 2.74323e-17 | 1.76193e-16 |
| regulation of glycolytic process by regulation of transcription from RNA polymerase II promoter                     | 2.91219e-17 | 1.86954e-16 |
| riboflavin transport                                                                                                | 3.05869e-17 | 1.96264e-16 |
| negative regulation of receptor biosynthetic process                                                                | 3.07397e-17 | 1.97148e-16 |
| regulation of engulfment of apoptotic cell                                                                          | 3.07920e-17 | 1.97387e-16 |
| L-proline biosynthetic process                                                                                      | 3.09661e-17 | 1.98310e-16 |
| erythrocyte maturation                                                                                              | 3.10510e-17 | 1.98756e-16 |
| negative regulation of collagen fibril organization                                                                 | 3.45025e-17 | 2.20527e-16 |
| regulation of hepatocyte growth factor receptor signaling pathway                                                   | 3.53209e-17 | 2.25430e-16 |
| positive regulation of collateral sprouting in absence of injury                                                    | 3.89539e-17 | 2.48135e-16 |
| regulation of microtubule binding                                                                                   | 3.94302e-17 | 2.51048e-16 |
| mesangial cell differentiation                                                                                      | 3.98920e-17 | 2.53865e-16 |
| positive regulation of glucose mediated signaling pathway                                                           | 4.05294e-17 | 2.57672e-16 |
| protein refolding                                                                                                   | 4.52382e-17 | 2.87192e-16 |
| postsynaptic actin cytoskeleton organization                                                                        | 4.66569e-17 | 2.96056e-16 |
| regulation of CD8-positive, alpha-beta T cell extravasation                                                         | 4.87560e-17 | 3.08929e-16 |

|                                                                                                   |             |             |
|---------------------------------------------------------------------------------------------------|-------------|-------------|
| regulation of natural killer cell apoptotic process                                               | 4.92166e-17 | 3.11697e-16 |
| steroid hormone receptor complex assembly                                                         | 5.58206e-17 | 3.52334e-16 |
| slow-twitch skeletal muscle fiber contraction                                                     | 5.69382e-17 | 3.59044e-16 |
| glycerol transport                                                                                | 6.47937e-17 | 4.07797e-16 |
| positive regulation of keratinocyte apoptotic process                                             | 6.93319e-17 | 4.35942e-16 |
| regulation of muscle atrophy                                                                      | 7.21827e-17 | 4.53651e-16 |
| glyoxylate cycle                                                                                  | 7.40880e-17 | 4.65181e-16 |
| proline biosynthetic process                                                                      | 8.28170e-17 | 5.18997e-16 |
| chromatin maintenance                                                                             | 8.88995e-17 | 5.56320e-16 |
| regulation of blood volume by renal aldosterone                                                   | 9.09149e-17 | 5.68661e-16 |
| regulation of Golgi inheritance                                                                   | 9.57379e-17 | 5.98260e-16 |
| regulation of growth plate cartilage chondrocyte proliferation                                    | 9.90898e-17 | 6.18911e-16 |
| cementum mineralization                                                                           | 1.00742e-16 | 6.28635e-16 |
| negative regulation of cell growth involved in contact inhibition                                 | 1.07464e-16 | 6.70259e-16 |
| nerve growth factor production                                                                    | 1.15773e-16 | 7.21399e-16 |
| IRES-dependent translational initiation                                                           | 1.27128e-16 | 7.91404e-16 |
| regulation of opioid receptor signaling pathway                                                   | 1.27390e-16 | 7.92664e-16 |
| establishment of animal organ orientation                                                         | 1.58834e-16 | 9.86452e-16 |
| positive regulation of antibacterial peptide production                                           | 1.59636e-16 | 9.90966e-16 |
| cellular response to leucine                                                                      | 1.70073e-16 | 1.05426e-15 |
| dermatan sulfate proteoglycan biosynthetic process, polysaccharide chain biosynthetic process     | 1.71183e-16 | 1.06014e-15 |
| lung goblet cell differentiation                                                                  | 1.72660e-16 | 1.06878e-15 |
| cell surface pattern recognition receptor signaling pathway                                       | 1.83172e-16 | 1.13226e-15 |
| negative regulation of T cell cytokine production                                                 | 1.92401e-16 | 1.18819e-15 |
| trachea cartilage morphogenesis                                                                   | 1.94605e-16 | 1.20123e-15 |
| DNA replication proofreading                                                                      | 2.10153e-16 | 1.29599e-15 |
| regulation of heart rate by hormone                                                               | 2.11612e-16 | 1.30438e-15 |
| ER-associated misfolded protein catabolic process                                                 | 2.27039e-16 | 1.39751e-15 |
| UV-damage excision repair                                                                         | 2.52020e-16 | 1.54910e-15 |
| negative regulation of macrophage derived foam cell differentiation                               | 2.91059e-16 | 1.78157e-15 |
| regulation of establishment of blood-brain barrier                                                | 2.91254e-16 | 1.78193e-15 |
| metanephric S-shaped body morphogenesis                                                           | 3.61838e-16 | 2.20659e-15 |
| catecholamine catabolic process                                                                   | 3.77654e-16 | 2.30198e-15 |
| sterol regulatory element binding protein import into nucleus                                     | 4.19622e-16 | 2.55069e-15 |
| synaptic transmission involved in micturition                                                     | 4.20397e-16 | 2.55423e-15 |
| cellular alkene metabolic process                                                                 | 4.46425e-16 | 2.70861e-15 |
| regulation of ATF6-mediated unfolded protein response                                             | 4.62652e-16 | 2.80577e-15 |
| protein insertion into ER membrane                                                                | 4.67530e-16 | 2.83405e-15 |
| positive regulation of intermediate filament depolymerization                                     | 4.70945e-16 | 2.85344e-15 |
| positive regulation of termination of RNA polymerase II transcription, poly(A)-coupled            | 4.85469e-16 | 2.93603e-15 |
| histone citrullination                                                                            | 5.85020e-16 | 3.52351e-15 |
| post-embryonic cardiac muscle cell growth involved in heart morphogenesis                         | 6.17722e-16 | 3.71537e-15 |
| positive regulation of chromatin silencing at telomere                                            | 6.17722e-16 | 3.71537e-15 |
| positive regulation of telomeric heterochromatin assembly                                         | 6.17722e-16 | 3.71537e-15 |
| modification of synaptic structure                                                                | 6.29917e-16 | 3.78353e-15 |
| response to high light intensity                                                                  | 6.40490e-16 | 3.84528e-15 |
| metanephric mesenchymal cell proliferation involved in metanephros development                    | 6.56602e-16 | 3.93842e-15 |
| chaperone mediated protein folding requiring cofactor                                             | 6.78788e-16 | 4.06964e-15 |
| mesangial cell development                                                                        | 7.28226e-16 | 4.35809e-15 |
| positive regulation of late endosome to lysosome transport                                        | 7.35978e-16 | 4.40048e-15 |
| negative regulation of neuronal action potential                                                  | 7.53728e-16 | 4.50456e-15 |
| cellular response to interferon-alpha                                                             | 8.11411e-16 | 4.84270e-15 |
| positive regulation of mesenchymal to epithelial transition involved in metanephros morphogenesis | 8.60332e-16 | 5.13001e-15 |
| positive regulation of gastric acid secretion                                                     | 8.86021e-16 | 5.27841e-15 |
| neural plate regionalization                                                                      | 9.70282e-16 | 5.76993e-15 |
| glucocorticoid biosynthetic process                                                               | 9.72667e-16 | 5.78150e-15 |
| establishment or maintenance of microtubule cytoskeleton polarity                                 | 1.02490e-15 | 6.08097e-15 |
| somite rostral/caudal axis specification                                                          | 1.07782e-15 | 6.38059e-15 |
| regulation of keratinocyte apoptotic process                                                      | 1.08615e-15 | 6.42408e-15 |
| hypochlorous acid biosynthetic process                                                            | 1.16694e-15 | 6.88955e-15 |
| response to gold nanoparticle                                                                     | 1.16694e-15 | 6.88955e-15 |
| positive regulation of engulfment of apoptotic cell                                               | 1.33977e-15 | 7.88870e-15 |
| glycogen cell differentiation involved in embryonic placenta development                          | 1.41362e-15 | 8.30863e-15 |
| negative regulation of protein kinase activity by protein phosphorylation                         | 1.41362e-15 | 8.30863e-15 |
| protein import into mitochondrial inner membrane                                                  | 1.41605e-15 | 8.31552e-15 |
| positive regulation of apoptotic DNA fragmentation                                                | 1.49003e-15 | 8.74605e-15 |
| proteasome assembly                                                                               | 1.54806e-15 | 9.07447e-15 |
| interleukin-3-mediated signaling pathway                                                          | 1.56129e-15 | 9.14798e-15 |

|                                                                                               |             |             |
|-----------------------------------------------------------------------------------------------|-------------|-------------|
| SREBP signaling pathway                                                                       | 1.57294e-15 | 9.21212e-15 |
| caveolin-mediated endocytosis                                                                 | 1.63137e-15 | 9.54585e-15 |
| IRES-dependent viral translational initiation                                                 | 1.64020e-15 | 9.59326e-15 |
| nuclear-transcribed mRNA catabolic process, endonucleolytic cleavage-dependent decay          | 1.80477e-15 | 1.05277e-14 |
| negative regulation of toll-like receptor 4 signaling pathway                                 | 1.88067e-15 | 1.09559e-14 |
| 90S preribosome assembly                                                                      | 1.90719e-15 | 1.11054e-14 |
| somatic motor neuron differentiation                                                          | 2.05752e-15 | 1.19755e-14 |
| positive regulation of T-helper 2 cell differentiation                                        | 2.16075e-15 | 1.25652e-14 |
| evasion or tolerance of host defenses by virus                                                | 2.20506e-15 | 1.28115e-14 |
| active induction of host immune response by virus                                             | 2.79724e-15 | 1.62020e-14 |
| regulation of adenosine receptor signaling pathway                                            | 2.86223e-15 | 1.65566e-14 |
| immune response to tumor cell                                                                 | 3.08195e-15 | 1.78120e-14 |
| positive regulation of transcription from RNA polymerase II promoter in response to acidic pH | 3.45663e-15 | 1.99598e-14 |
| glyceraldehyde-3-phosphate biosynthetic process                                               | 3.52465e-15 | 2.03437e-14 |
| adrenergic receptor signaling pathway involved in cardiac muscle relaxation                   | 3.88382e-15 | 2.23774e-14 |
| U2 snRNA 3'-end processing                                                                    | 3.94421e-15 | 2.26956e-14 |
| gamma-delta T cell differentiation                                                            | 4.07539e-15 | 2.34402e-14 |
| angiotensin-activated signaling pathway involved in heart process                             | 4.08575e-15 | 2.34895e-14 |
| virus maturation                                                                              | 4.21418e-15 | 2.41750e-14 |
| viral translation                                                                             | 4.24013e-15 | 2.43133e-14 |
| negative regulation of type I interferon-mediated signaling pathway                           | 4.45520e-15 | 2.55132e-14 |
| ciliary basal body organization                                                               | 4.93297e-15 | 2.82368e-14 |
| regulation of glucagon secretion                                                              | 4.94805e-15 | 2.83109e-14 |
| negative regulation of synaptic vesicle recycling                                             | 5.05703e-15 | 2.89218e-14 |
| cellular response to copper ion starvation                                                    | 6.14041e-15 | 3.50721e-14 |
| cellular response to azide                                                                    | 6.14041e-15 | 3.50721e-14 |
| single stranded viral RNA replication via double stranded DNA intermediate                    | 6.16116e-15 | 3.51601e-14 |
| regulation of the force of heart contraction by chemical signal                               | 6.40562e-15 | 3.65393e-14 |
| positive regulation of transcription elongation from RNA polymerase II promoter               | 6.43421e-15 | 3.66864e-14 |
| thiosulfate transport                                                                         | 6.45735e-15 | 3.68024e-14 |
| malate transmembrane transport                                                                | 6.45735e-15 | 3.68024e-14 |
| oxaloacetate(2-) transmembrane transport                                                      | 6.45735e-15 | 3.68024e-14 |
| negative regulation of growth rate                                                            | 6.64633e-15 | 3.78139e-14 |
| glucose mediated signaling pathway                                                            | 6.80034e-15 | 3.86734e-14 |
| negative regulation of CREB transcription factor activity                                     | 6.98237e-15 | 3.96572e-14 |
| axonemal microtubule depolymerization                                                         | 7.31651e-15 | 4.15191e-14 |
| plus-end specific microtubule depolymerization                                                | 7.31651e-15 | 4.15191e-14 |
| propylene metabolic process                                                                   | 7.58640e-15 | 4.29580e-14 |
| response to glycine                                                                           | 7.58640e-15 | 4.29580e-14 |
| growth plate cartilage morphogenesis                                                          | 8.21268e-15 | 4.64443e-14 |
| positive regulation of protein localization to nucleolus                                      | 8.47838e-15 | 4.79263e-14 |
| epoxide metabolic process                                                                     | 8.67076e-15 | 4.89717e-14 |
| response to thyrotropin-releasing hormone                                                     | 9.01475e-15 | 5.08709e-14 |
| cellular response to alkaline pH                                                              | 9.35830e-15 | 5.27643e-14 |
| globoside biosynthetic process                                                                | 1.00640e-14 | 5.66461e-14 |
| phosphatidylserine catabolic process                                                          | 1.10366e-14 | 6.19879e-14 |
| detection of hormone stimulus                                                                 | 1.11844e-14 | 6.27914e-14 |
| metanephric descending thin limb development                                                  | 1.15236e-14 | 6.46402e-14 |
| metanephric proximal straight tubule development                                              | 1.15236e-14 | 6.46402e-14 |
| metanephric proximal convoluted tubule segment 2 development                                  | 1.15236e-14 | 6.46402e-14 |
| maintenance of symbiont-containing vacuole by host                                            | 1.15236e-14 | 6.46402e-14 |
| protein de-ADP-ribosylation                                                                   | 1.15723e-14 | 6.48032e-14 |
| regulation of eye pigmentation                                                                | 1.18986e-14 | 6.64885e-14 |
| regulation of testosterone biosynthetic process                                               | 1.33341e-14 | 7.42890e-14 |
| spliceosomal tri-snRNP complex assembly                                                       | 1.39120e-14 | 7.74435e-14 |
| homoiothermy                                                                                  | 1.48919e-14 | 8.27578e-14 |
| isoquinoline alkaloid metabolic process                                                       | 1.72184e-14 | 9.54850e-14 |
| positive regulation of synaptic growth at neuromuscular junction                              | 1.89699e-14 | 1.05021e-13 |
| spine apparatus assembly                                                                      | 1.96644e-14 | 1.08775e-13 |
| cell-abiotic substrate adhesion                                                               | 1.96894e-14 | 1.08867e-13 |
| regulation of endocytic recycling                                                             | 1.98207e-14 | 1.09547e-13 |
| heme oxidation                                                                                | 2.00104e-14 | 1.10549e-13 |
| neuroblast division in subventricular zone                                                    | 2.05227e-14 | 1.13236e-13 |
| endonucleolytic cleavage of tricistronic rRNA transcript (SSU-rRNA, 5.8S rRNA, LSU-rRNA)      | 2.09947e-14 | 1.15792e-13 |
| transcription from mitochondrial promoter                                                     | 2.22325e-14 | 1.22465e-13 |
| cellular response to phosphate starvation                                                     | 2.23233e-14 | 1.22914e-13 |
| positive regulation of homocysteine metabolic process                                         | 2.23233e-14 | 1.22914e-13 |
| renal phosphate ion absorption                                                                | 2.29494e-14 | 1.26202e-13 |
| cellular response to salt                                                                     | 2.32009e-14 | 1.27532e-13 |

|                                                                                                                                    |             |             |
|------------------------------------------------------------------------------------------------------------------------------------|-------------|-------------|
| myoblast fusion involved in skeletal muscle regeneration                                                                           | 2.36432e-14 | 1.29909e-13 |
| regulation of chromatin disassembly                                                                                                | 2.39500e-14 | 1.31540e-13 |
| hypermethylation of CpG island                                                                                                     | 2.46441e-14 | 1.35127e-13 |
| epiboly involved in gastrulation with mouth forming second                                                                         | 2.47586e-14 | 1.35698e-13 |
| negative regulation of RNA interference                                                                                            | 2.57575e-14 | 1.41113e-13 |
| positive regulation of hyaluronan cable assembly                                                                                   | 2.64944e-14 | 1.45090e-13 |
| positive regulation of monocyte chemotactic protein-1 production                                                                   | 2.67889e-14 | 1.46642e-13 |
| natural killer cell tolerance induction                                                                                            | 2.77602e-14 | 1.51581e-13 |
| positive regulation of T cell activation via T cell receptor contact with antigen bound to MHC molecule on antigen presenting cell | 2.92487e-14 | 1.59510e-13 |
| positive regulation of microtubule nucleation                                                                                      | 3.04786e-14 | 1.66079e-13 |
| DNA methylation on cytosine                                                                                                        | 3.33505e-14 | 1.81353e-13 |
| coreceptor-mediated virion attachment to host cell                                                                                 | 3.40613e-14 | 1.85065e-13 |
| vitamin D receptor signaling pathway                                                                                               | 3.41808e-14 | 1.85637e-13 |
| response to water deprivation                                                                                                      | 3.90564e-14 | 2.11419e-13 |
| positive regulation of histone ubiquitination                                                                                      | 4.00146e-14 | 2.16517e-13 |
| chondroblast differentiation                                                                                                       | 4.09389e-14 | 2.21336e-13 |
| negative regulation of protein targeting to membrane                                                                               | 4.10621e-14 | 2.21911e-13 |
| granuloma formation                                                                                                                | 5.18610e-14 | 2.79010e-13 |
| L-alanine catabolic process                                                                                                        | 5.22895e-14 | 2.81200e-13 |
| regulation of hydrogen peroxide biosynthetic process                                                                               | 5.25382e-14 | 2.82422e-13 |
| D-amino acid transport                                                                                                             | 5.63133e-14 | 3.02222e-13 |
| ectoderm formation                                                                                                                 | 5.70148e-14 | 3.05862e-13 |
| regulation of arachidonic acid secretion                                                                                           | 5.93243e-14 | 3.17862e-13 |
| positive regulation of cytotoxic T cell differentiation                                                                            | 6.34186e-14 | 3.39385e-13 |
| positive regulation of neutrophil degranulation                                                                                    | 6.93414e-14 | 3.70629e-13 |
| interferon-beta production                                                                                                         | 7.21541e-14 | 3.85193e-13 |
| response to cobalamin                                                                                                              | 7.59380e-14 | 4.04572e-13 |
| negative regulation of phosphatidylcholine catabolic process                                                                       | 7.69627e-14 | 4.09865e-13 |
| regulation of deoxyribonuclease activity                                                                                           | 8.27286e-14 | 4.39504e-13 |
| positive regulation blood vessel branching                                                                                         | 8.49654e-14 | 4.51205e-13 |
| positive regulation of chromatin assembly or disassembly                                                                           | 8.53617e-14 | 4.53127e-13 |
| pentose biosynthetic process                                                                                                       | 8.89289e-14 | 4.71682e-13 |
| anterograde dendritic transport of neurotransmitter receptor complex                                                               | 9.15720e-14 | 4.85310e-13 |
| eosinophil differentiation                                                                                                         | 9.25440e-14 | 4.90263e-13 |
| glycolipid transport                                                                                                               | 9.84147e-14 | 5.20526e-13 |
| regulation of RNA interference                                                                                                     | 1.06460e-13 | 5.62401e-13 |
| negative regulation of hypoxia-induced intrinsic apoptotic signaling pathway                                                       | 1.07423e-13 | 5.67034e-13 |
| response to isolation stress                                                                                                       | 1.11824e-13 | 5.89314e-13 |
| TCR signalosome assembly                                                                                                           | 1.21563e-13 | 6.39872e-13 |
| vestibulocochlear nerve formation                                                                                                  | 1.24886e-13 | 6.56835e-13 |
| negative regulation of autophagosome maturation                                                                                    | 1.27055e-13 | 6.67977e-13 |
| growth involved in heart morphogenesis                                                                                             | 1.37471e-13 | 7.21875e-13 |
| cellular response to vasopressin                                                                                                   | 1.40975e-13 | 7.39683e-13 |
| polyamine transport                                                                                                                | 1.60194e-13 | 8.38851e-13 |
| smooth muscle cell-matrix adhesion                                                                                                 | 1.70061e-13 | 8.89101e-13 |
| purine nucleobase salvage                                                                                                          | 1.78244e-13 | 9.30036e-13 |
| hyaloid vascular plexus regression                                                                                                 | 1.82806e-13 | 9.53083e-13 |
| negative regulation of sperm capacitation                                                                                          | 1.84149e-13 | 9.59325e-13 |
| regulation of chondrocyte development                                                                                              | 1.88793e-13 | 9.83131e-13 |
| respiratory burst involved in defense response                                                                                     | 2.12843e-13 | 1.10662e-12 |
| negative regulation of dendritic cell differentiation                                                                              | 2.14841e-13 | 1.11656e-12 |
| negative regulation of adiponectin secretion                                                                                       | 2.28582e-13 | 1.18610e-12 |
| positive regulation of glycogen (starch) synthase activity                                                                         | 2.31108e-13 | 1.19874e-12 |
| regulation of protein localization to nucleolus                                                                                    | 2.54012e-13 | 1.31443e-12 |
| positive regulation of eosinophil migration                                                                                        | 2.55976e-13 | 1.32407e-12 |
| disaccharide metabolic process                                                                                                     | 2.57112e-13 | 1.32942e-12 |
| response to brefeldin A                                                                                                            | 2.75406e-13 | 1.42178e-12 |
| response to alkaline pH                                                                                                            | 2.78914e-13 | 1.43876e-12 |
| response to host defenses                                                                                                          | 2.81259e-13 | 1.45028e-12 |
| transforming growth factor beta activation                                                                                         | 2.81769e-13 | 1.45235e-12 |
| positive regulation of mesenchymal stem cell proliferation                                                                         | 2.81769e-13 | 1.45235e-12 |
| atrioventricular canal morphogenesis                                                                                               | 3.42447e-13 | 1.75753e-12 |
| neural plate anterior/posterior regionalization                                                                                    | 3.56225e-13 | 1.82753e-12 |
| regulation of endodeoxyribonuclease activity                                                                                       | 3.59422e-13 | 1.84321e-12 |
| olefin metabolic process                                                                                                           | 3.69224e-13 | 1.89274e-12 |
| immunoglobulin transcytosis in epithelial cells                                                                                    | 3.88796e-13 | 1.98997e-12 |
| hypomethylation of CpG island                                                                                                      | 4.01755e-13 | 2.05470e-12 |
| septum secundum development                                                                                                        | 4.09006e-13 | 2.08935e-12 |
| ammon gyrus development                                                                                                            | 4.09864e-13 | 2.09291e-12 |
| positive regulation of aldosterone biosynthetic process                                                                            | 4.13078e-13 | 2.10851e-12 |
| endonucleolytic cleavage involved in rRNA processing                                                                               | 4.38571e-13 | 2.23517e-12 |
| germline cell cycle switching, mitotic to meiotic cell cycle                                                                       | 4.47995e-13 | 2.28143e-12 |
| chromosome passenger complex localization to kinetochore                                                                           | 4.57345e-13 | 2.32724e-12 |

|                                                                                                                      |             |             |
|----------------------------------------------------------------------------------------------------------------------|-------------|-------------|
| diaphragm contraction                                                                                                | 4.68482e-13 | 2.38207e-12 |
| receptor-mediated endocytosis involved in cholesterol transport                                                      | 5.06686e-13 | 2.57334e-12 |
| endothelial cell apoptotic process                                                                                   | 5.14014e-13 | 2.60955e-12 |
| cellular response to menadione                                                                                       | 5.87475e-13 | 2.97561e-12 |
| siderophore transport                                                                                                | 6.13389e-13 | 3.10567e-12 |
| regulation of translational initiation by eIF2 alpha dephosphorylation                                               | 6.46382e-13 | 3.27020e-12 |
| succinate transmembrane transport                                                                                    | 6.49559e-13 | 3.28501e-12 |
| negative regulation of non-motile cilium assembly                                                                    | 7.08836e-13 | 3.57791e-12 |
| membrane depolarization during Purkinje myocyte cell action potential                                                | 7.20805e-13 | 3.63693e-12 |
| rRNA (guanine-N7)-methylation                                                                                        | 7.34364e-13 | 3.70392e-12 |
| positive regulation of lipoprotein lipase activity                                                                   | 7.38579e-13 | 3.72375e-12 |
| thrombopoietin-mediated signaling pathway                                                                            | 7.46915e-13 | 3.76434e-12 |
| regulation of smooth muscle cell-matrix adhesion                                                                     | 7.48916e-13 | 3.77298e-12 |
| positive regulation of inositol 1,4,5-trisphosphate-sensitive calcium-release channel activity                       | 7.78716e-13 | 3.91860e-12 |
| regulation of primitive erythrocyte differentiation                                                                  | 8.09306e-13 | 4.06942e-12 |
| eosinophil fate commitment                                                                                           | 8.09306e-13 | 4.06942e-12 |
| deoxyribonucleoside monophosphate catabolic process                                                                  | 8.88485e-13 | 4.45903e-12 |
| response to ketamine                                                                                                 | 9.06734e-13 | 4.54888e-12 |
| cellular response to monosodium glutamate                                                                            | 9.06734e-13 | 4.54888e-12 |
| response to Aroclor 1254                                                                                             | 9.06734e-13 | 4.54888e-12 |
| peripheral nervous system myelin maintenance                                                                         | 9.33622e-13 | 4.67842e-12 |
| regulation of transcription from RNA polymerase II promoter involved in spinal cord association neuron specification | 9.79206e-13 | 4.90311e-12 |
| synaptic vesicle budding                                                                                             | 1.01622e-12 | 5.08460e-12 |
| acrosome matrix dispersal                                                                                            | 1.02314e-12 | 5.11724e-12 |
| negative regulation of alpha-beta T cell proliferation                                                               | 1.03580e-12 | 5.17861e-12 |
| formation of translation preinitiation complex                                                                       | 1.04428e-12 | 5.21900e-12 |
| positive regulation of single-stranded telomeric DNA binding                                                         | 1.09831e-12 | 5.48697e-12 |
| uridine transport                                                                                                    | 1.11126e-12 | 5.54536e-12 |
| regulation of chromatin assembly                                                                                     | 1.14465e-12 | 5.70547e-12 |
| susceptibility to T cell mediated cytotoxicity                                                                       | 1.15065e-12 | 5.73104e-12 |
| negative regulation of forebrain neuron differentiation                                                              | 1.18388e-12 | 5.89430e-12 |
| mast cell chemotaxis                                                                                                 | 1.20611e-12 | 6.00272e-12 |
| ADP transport                                                                                                        | 1.24062e-12 | 6.16978e-12 |
| dATP catabolic process                                                                                               | 1.32706e-12 | 6.59468e-12 |
| cellular response to high light intensity                                                                            | 1.41521e-12 | 7.01685e-12 |
| retinal rod cell apoptotic process                                                                                   | 1.41521e-12 | 7.01685e-12 |
| heme catabolic process                                                                                               | 1.46889e-12 | 7.27203e-12 |
| B cell negative selection                                                                                            | 1.49357e-12 | 7.38865e-12 |
| negative regulation of histone H3-K9 dimethylation                                                                   | 1.53265e-12 | 7.56490e-12 |
| N-acetylmannosamine metabolic process                                                                                | 1.54433e-12 | 7.61968e-12 |
| cuticle development                                                                                                  | 1.55445e-12 | 7.66388e-12 |
| aflatoxin metabolic process                                                                                          | 1.58933e-12 | 7.82704e-12 |
| cellular response to redox state                                                                                     | 1.59955e-12 | 7.87443e-12 |
| negative regulation of protein ADP-ribosylation                                                                      | 1.63440e-12 | 8.04297e-12 |
| tetrahydrofolylpolyglutamate biosynthetic process                                                                    | 1.75020e-12 | 8.60321e-12 |
| preassembly of GPI anchor in ER membrane                                                                             | 1.84600e-12 | 9.06734e-12 |
| inositol phosphorylation                                                                                             | 1.86773e-12 | 9.17062e-12 |
| negative regulation of epithelial cell proliferation involved in prostate gland development                          | 1.91810e-12 | 9.40742e-12 |
| double-strand break repair via break-induced replication                                                             | 2.18502e-12 | 1.06926e-11 |
| positive regulation of double-strand break repair via homologous recombination                                       | 2.44603e-12 | 1.19432e-11 |
| canonical Wnt signaling pathway involved in cardiac muscle cell fate commitment                                      | 2.64836e-12 | 1.29024e-11 |
| regulation of parathyroid hormone secretion                                                                          | 2.75090e-12 | 1.33723e-11 |
| regulation of renal output by angiotensin                                                                            | 2.82975e-12 | 1.37302e-11 |
| L-cysteine catabolic process                                                                                         | 2.91329e-12 | 1.41251e-11 |
| histone H3-K27 trimethylation                                                                                        | 3.31254e-12 | 1.60254e-11 |
| positive regulation of muscle atrophy                                                                                | 3.39762e-12 | 1.64310e-11 |
| regulation of viral budding via host ESCRT complex                                                                   | 3.41089e-12 | 1.64891e-11 |
| negative regulation of interleukin-2 secretion                                                                       | 3.47968e-12 | 1.68155e-11 |
| negative regulation of protein K63-linked ubiquitination                                                             | 3.94052e-12 | 1.90215e-11 |
| determination of affect                                                                                              | 4.45073e-12 | 2.14372e-11 |
| nephrogenic mesenchyme morphogenesis                                                                                 | 4.55312e-12 | 2.19143e-11 |
| positive regulation of TORC2 signaling                                                                               | 4.65384e-12 | 2.23908e-11 |
| glutamine secretion                                                                                                  | 4.77357e-12 | 2.29418e-11 |
| L-glutamine import into cell                                                                                         | 4.77357e-12 | 2.29418e-11 |
| C-5 methylation of cytosine                                                                                          | 4.78744e-12 | 2.29916e-11 |
| trehalose catabolic process                                                                                          | 4.89152e-12 | 2.34829e-11 |
| positive regulation of retinoic acid receptor signaling pathway                                                      | 4.91791e-12 | 2.35923e-11 |
| positive regulation of 1-phosphatidylinositol 4-kinase activity                                                      | 5.28968e-12 | 2.53296e-11 |
| medium-chain fatty acid transport                                                                                    | 5.51447e-12 | 2.63772e-11 |

|                                                                                                                                          |             |             |
|------------------------------------------------------------------------------------------------------------------------------------------|-------------|-------------|
| slow endocytic recycling                                                                                                                 | 5.70700e-12 | 2.72882e-11 |
| indole metabolic process                                                                                                                 | 5.75944e-12 | 2.75290e-11 |
| gentamycin metabolic process                                                                                                             | 5.75944e-12 | 2.75290e-11 |
| arsenate ion transmembrane transport                                                                                                     | 5.75944e-12 | 2.75290e-11 |
| positive regulation of sodium-dependent phosphate transport                                                                              | 5.75944e-12 | 2.75290e-11 |
| positive regulation of phosphate transmembrane transport                                                                                 | 5.75944e-12 | 2.75290e-11 |
| third ventricle development                                                                                                              | 5.82021e-12 | 2.77589e-11 |
| defecation                                                                                                                               | 6.56521e-12 | 3.12554e-11 |
| positive regulation of microtubule depolymerization                                                                                      | 6.62945e-12 | 3.15499e-11 |
| response to erythropoietin                                                                                                               | 6.64560e-12 | 3.16039e-11 |
| negative regulation of potassium ion export                                                                                              | 7.27782e-12 | 3.45854e-11 |
| formate transport                                                                                                                        | 7.86294e-12 | 3.73390e-11 |
| mannitol transport                                                                                                                       | 7.86294e-12 | 3.73390e-11 |
| galactitol metabolic process                                                                                                             | 7.93286e-12 | 3.76439e-11 |
| glycolytic process from galactose                                                                                                        | 7.93286e-12 | 3.76439e-11 |
| twitch skeletal muscle contraction                                                                                                       | 9.13594e-12 | 4.32126e-11 |
| negative regulation of guanylate cyclase activity                                                                                        | 9.18665e-12 | 4.34056e-11 |
| positive regulation of heterochromatin assembly                                                                                          | 9.36395e-12 | 4.42274e-11 |
| positive regulation of cAMP catabolic process                                                                                            | 9.65236e-12 | 4.55569e-11 |
| negative regulation of membrane tubulation                                                                                               | 9.79908e-12 | 4.62163e-11 |
| protein maturation by iron-sulfur cluster transfer                                                                                       | 1.03422e-11 | 4.87430e-11 |
| negative regulation of neural crest formation                                                                                            | 1.13022e-11 | 5.32103e-11 |
| negative regulation of fibroblast growth factor receptor signaling pathway involved in neural plate anterior/posterior pattern formation | 1.13022e-11 | 5.32103e-11 |
| glycine biosynthetic process from serine                                                                                                 | 1.23734e-11 | 5.80871e-11 |
| phosphocreatine biosynthetic process                                                                                                     | 1.25076e-11 | 5.86963e-11 |
| pyridoxal phosphate catabolic process                                                                                                    | 1.32830e-11 | 6.22684e-11 |
| positive regulation of nucleoside transport                                                                                              | 1.32966e-11 | 6.23098e-11 |
| negative regulation of neurotrophin production                                                                                           | 1.32966e-11 | 6.23098e-11 |
| positive regulation of mesoderm development                                                                                              | 1.35243e-11 | 6.33317e-11 |
| skeletal muscle satellite cell commitment                                                                                                | 1.42409e-11 | 6.66401e-11 |
| regulation of cell motility involved in somitogenic axis elongation                                                                      | 1.44410e-11 | 6.75521e-11 |
| positive regulation of non-canonical Wnt signaling pathway via JNK cascade                                                               | 1.44410e-11 | 6.75521e-11 |
| negative regulation of convergent extension involved in axis elongation                                                                  | 1.44410e-11 | 6.75521e-11 |
| substance P catabolic process                                                                                                            | 1.48395e-11 | 6.93177e-11 |
| calcitonin catabolic process                                                                                                             | 1.48395e-11 | 6.93177e-11 |
| endothelin maturation                                                                                                                    | 1.48395e-11 | 6.93177e-11 |
| mesenchyme migration                                                                                                                     | 1.74749e-11 | 8.13391e-11 |
| synaptic vesicle lumen acidification                                                                                                     | 1.81357e-11 | 8.43256e-11 |
| positive regulation of chylomicron remnant clearance                                                                                     | 1.81795e-11 | 8.44995e-11 |
| Wnt-activated signaling pathway involved in forebrain neuron fate commitment                                                             | 1.87259e-11 | 8.70082e-11 |
| canonical Wnt signaling pathway involved in neural plate anterior/posterior pattern formation                                            | 1.87259e-11 | 8.70082e-11 |
| phytoalexin metabolic process                                                                                                            | 1.93796e-11 | 8.99502e-11 |
| response to insecticide                                                                                                                  | 1.98830e-11 | 9.22545e-11 |
| multi-organism toxin transport                                                                                                           | 2.04290e-11 | 9.46873e-11 |
| negative regulation of MDA-5 signaling pathway                                                                                           | 2.29459e-11 | 1.06204e-10 |
| N-glycan processing to lysosome                                                                                                          | 2.38296e-11 | 1.10177e-10 |
| positive regulation of glutamine transport                                                                                               | 2.69340e-11 | 1.24312e-10 |
| regulation of nucleoside transport                                                                                                       | 2.96417e-11 | 1.36522e-10 |
| positive regulation of sequestering of triglyceride                                                                                      | 3.03737e-11 | 1.39845e-10 |
| snoRNA processing                                                                                                                        | 3.05515e-11 | 1.40614e-10 |
| cellular response to cisplatin                                                                                                           | 3.08666e-11 | 1.42015e-10 |
| regulation of progesterone secretion                                                                                                     | 3.26121e-11 | 1.49836e-10 |
| peptidyl-L-cysteine S-palmitoylation                                                                                                     | 3.38790e-11 | 1.55548e-10 |
| regulation of collateral sprouting in absence of injury                                                                                  | 3.41475e-11 | 1.56671e-10 |
| growth hormone secretion                                                                                                                 | 3.58587e-11 | 1.64236e-10 |
| positive regulation of translational fidelity                                                                                            | 3.60012e-11 | 1.64831e-10 |
| thromboxane A2 signaling pathway                                                                                                         | 3.73078e-11 | 1.70695e-10 |
| tRNA pseudouridine synthesis                                                                                                             | 3.87672e-11 | 1.77249e-10 |
| negative regulation of microtubule binding                                                                                               | 4.19079e-11 | 1.91276e-10 |
| trochlear nerve development                                                                                                              | 4.25725e-11 | 1.94107e-10 |
| oxidation-dependent protein catabolic process                                                                                            | 4.87331e-11 | 2.21811e-10 |
| response to injury involved in regulation of muscle adaptation                                                                           | 5.13892e-11 | 2.33577e-10 |
| negative regulation of mature B cell apoptotic process                                                                                   | 5.62892e-11 | 2.55144e-10 |
| B cell selection                                                                                                                         | 5.64331e-11 | 2.55708e-10 |
| positive regulation of viral budding via host ESCRT complex                                                                              | 5.65954e-11 | 2.56356e-10 |
| positive regulation of prostaglandin-endoperoxide synthase activity                                                                      | 5.78816e-11 | 2.62001e-10 |
| positive regulation of protein monoubiquitination                                                                                        | 5.84119e-11 | 2.64311e-10 |
| chromosome passenger complex localization to spindle midzone                                                                             | 6.07908e-11 | 2.74791e-10 |
| L-histidine transmembrane transport                                                                                                      | 6.23473e-11 | 2.81537e-10 |
| tricuspid valve formation                                                                                                                | 6.99402e-11 | 3.15390e-10 |

|                                                                                                                           |             |             |
|---------------------------------------------------------------------------------------------------------------------------|-------------|-------------|
| snRNA 3'-end processing                                                                                                   | 7.48798e-11 | 3.37203e-10 |
| cell proliferation in bone marrow                                                                                         | 7.95450e-11 | 3.58089e-10 |
| negative regulation of gap junction assembly                                                                              | 7.95450e-11 | 3.58089e-10 |
| negative regulation of hydrogen peroxide biosynthetic process                                                             | 8.07466e-11 | 3.63249e-10 |
| glomerular mesangial cell proliferation                                                                                   | 8.61820e-11 | 3.87039e-10 |
| positive regulation of low-density lipoprotein particle receptor biosynthetic process                                     | 8.89893e-11 | 3.99374e-10 |
| regulation of T cell activation via T cell receptor contact with antigen bound to MHC molecule on antigen presenting cell | 8.99119e-11 | 4.03377e-10 |
| nucleokinesis involved in cell motility in cerebral cortex radial glia guided migration                                   | 9.90677e-11 | 4.43697e-10 |
| positive regulation of spontaneous neurotransmitter secretion                                                             | 1.02342e-10 | 4.58204e-10 |
| negative regulation of macropinocytosis                                                                                   | 1.02342e-10 | 4.58204e-10 |
| regulation of caveolin-mediated endocytosis                                                                               | 1.06723e-10 | 4.77006e-10 |
| regulation of mRNA export from nucleus                                                                                    | 1.09905e-10 | 4.90730e-10 |
| negative regulation of microglial cell activation                                                                         | 1.11457e-10 | 4.97324e-10 |
| positive regulation of antimicrobial humoral response                                                                     | 1.11733e-10 | 4.98385e-10 |
| positive regulation of nephron tubule epithelial cell differentiation                                                     | 1.11754e-10 | 4.98311e-10 |
| positive regulation of type IIa hypersensitivity                                                                          | 1.29592e-10 | 5.75895e-10 |
| vacuolar sequestering                                                                                                     | 1.33562e-10 | 5.93139e-10 |
| negative regulation of N-terminal protein palmitoylation                                                                  | 1.38331e-10 | 6.13903e-10 |
| regulation of definitive erythrocyte differentiation                                                                      | 1.38505e-10 | 6.14468e-10 |
| metanephric mesenchymal cell migration                                                                                    | 1.46899e-10 | 6.51046e-10 |
| cell migration involved in coronary angiogenesis                                                                          | 1.46899e-10 | 6.51046e-10 |
| metanephric glomerular mesangial cell proliferation involved in metanephros development                                   | 1.46899e-10 | 6.51046e-10 |
| positive regulation of transcription via serum response element binding                                                   | 1.53787e-10 | 6.80656e-10 |
| negative regulation of chromatin silencing at rDNA                                                                        | 1.53946e-10 | 6.81132e-10 |
| late nucleophagy                                                                                                          | 1.56681e-10 | 6.92534e-10 |
| dUMP catabolic process                                                                                                    | 1.58160e-10 | 6.98603e-10 |
| excitatory chemical synaptic transmission                                                                                 | 1.60385e-10 | 7.08192e-10 |
| cardiac right ventricle formation                                                                                         | 1.76951e-10 | 7.78988e-10 |
| modulation by symbiont of host signal transduction pathway                                                                | 1.93091e-10 | 8.48338e-10 |
| response to type III interferon                                                                                           | 1.99525e-10 | 8.75728e-10 |
| signal transduction downstream of smoothened                                                                              | 2.01555e-10 | 8.84341e-10 |
| positive regulation of protein localization to cilium                                                                     | 2.15052e-10 | 9.41988e-10 |
| positive regulation of t-circle formation                                                                                 | 2.20112e-10 | 9.63190e-10 |
| amino acid homeostasis                                                                                                    | 2.24671e-10 | 9.82486e-10 |
| follicular dendritic cell differentiation                                                                                 | 2.50170e-10 | 1.09218e-9  |
| mitochondrial pyruvate transmembrane transport                                                                            | 2.59039e-10 | 1.12903e-9  |
| post-embryonic camera-type eye morphogenesis                                                                              | 2.72253e-10 | 1.18544e-9  |
| alanine catabolic process                                                                                                 | 2.73936e-10 | 1.19198e-9  |
| sensory perception of touch                                                                                               | 2.76152e-10 | 1.20122e-9  |
| negative regulation of synapse maturation                                                                                 | 2.81862e-10 | 1.22525e-9  |
| replication-born double-strand break repair via sister chromatid exchange                                                 | 3.19542e-10 | 1.38630e-9  |
| myoblast development                                                                                                      | 3.24244e-10 | 1.40438e-9  |
| positive regulation of apoptotic process involved in mammary gland involution                                             | 3.29450e-10 | 1.42646e-9  |
| female meiosis I                                                                                                          | 3.31860e-10 | 1.43595e-9  |
| cellular response to L-arginine                                                                                           | 3.32482e-10 | 1.43817e-9  |
| generation of catalytic spliceosome for first transesterification step                                                    | 3.38602e-10 | 1.46416e-9  |
| regulation of thymocyte migration                                                                                         | 3.72563e-10 | 1.60784e-9  |
| aldehyde catabolic process                                                                                                | 3.80638e-10 | 1.64161e-9  |
| rescue of stalled ribosome                                                                                                | 3.83287e-10 | 1.65249e-9  |
| purine deoxyribonucleotide catabolic process                                                                              | 3.89197e-10 | 1.67633e-9  |
| ganglioside GM1 transport to membrane                                                                                     | 3.90931e-10 | 1.68324e-9  |
| distal tubule morphogenesis                                                                                               | 4.05870e-10 | 1.74528e-9  |
| endonucleolytic cleavage to generate mature 3'-end of SSU-rRNA from (SSU-rRNA, 5.8S rRNA, LSU-rRNA)                       | 4.30889e-10 | 1.85044e-9  |
| regulation of glutamine transport                                                                                         | 4.32367e-10 | 1.85619e-9  |
| 10-formyltetrahydrofolate catabolic process                                                                               | 4.42777e-10 | 1.89840e-9  |
| glycine biosynthetic process, by transamination of glyoxylate                                                             | 4.44055e-10 | 1.90326e-9  |
| positive regulation of norepinephrine secretion                                                                           | 4.61930e-10 | 1.97537e-9  |
| UDP-glucose transport                                                                                                     | 4.68080e-10 | 1.99971e-9  |
| ITP catabolic process                                                                                                     | 4.75643e-10 | 2.03137e-9  |
| response to herbicide                                                                                                     | 4.77804e-10 | 2.03993e-9  |
| positive regulation of progesterone secretion                                                                             | 4.88223e-10 | 2.08306e-9  |
| positive regulation of fast-twitch skeletal muscle fiber contraction                                                      | 5.13265e-10 | 2.18778e-9  |
| protein sialylation                                                                                                       | 5.51251e-10 | 2.34513e-9  |
| regulation of chromatin assembly or disassembly                                                                           | 5.64708e-10 | 2.40083e-9  |
| response to muscle activity involved in regulation of muscle adaptation                                                   | 6.74520e-10 | 2.86029e-9  |
| type I interferon biosynthetic process                                                                                    | 7.28554e-10 | 3.08445e-9  |

|                                                                                                |             |            |
|------------------------------------------------------------------------------------------------|-------------|------------|
| protein lipoylation                                                                            | 7.51308e-10 | 3.17772e-9 |
| modification by virus of host mRNA processing                                                  | 7.56554e-10 | 3.19785e-9 |
| negative regulation of antifungal innate immune response                                       | 8.15160e-10 | 3.43784e-9 |
| tRNA dihydrouridine synthesis                                                                  | 8.25207e-10 | 3.47798e-9 |
| cellular response to vitamin E                                                                 | 8.59152e-10 | 3.61873e-9 |
| cellular response to interleukin-3                                                             | 8.67006e-10 | 3.65064e-9 |
| snoRNA 3'-end processing                                                                       | 8.88457e-10 | 3.73857e-9 |
| negative regulation of oocyte maturation                                                       | 9.35848e-10 | 3.93421e-9 |
| establishment or maintenance of actin cytoskeleton polarity                                    | 9.43114e-10 | 3.96349e-9 |
| glyoxylate catabolic process                                                                   | 9.75463e-10 | 4.09682e-9 |
| positive regulation of phospholipase C-activating G-protein coupled receptor signaling pathway | 9.84520e-10 | 4.13354e-9 |
| translational attenuation                                                                      | 1.00428e-9  | 4.21383e-9 |
| polyamine catabolic process                                                                    | 1.04763e-9  | 4.39149e-9 |
| sequestering of nodal from receptor via nodal binding                                          | 1.06663e-9  | 4.46828e-9 |
| adenosine to inosine editing                                                                   | 1.07267e-9  | 4.49215e-9 |
| ganglioside catabolic process                                                                  | 1.08430e-9  | 4.53799e-9 |
| D-xylose metabolic process                                                                     | 1.08603e-9  | 4.54378e-9 |
| definitive erythrocyte differentiation                                                         | 1.08778e-9  | 4.54964e-9 |
| regulation of positive thymic T cell selection                                                 | 1.09052e-9  | 4.55966e-9 |
| negative regulation of caveolin-mediated endocytosis                                           | 1.13741e-9  | 4.75118e-9 |
| maturation of 5S rRNA                                                                          | 1.15579e-9  | 4.82490e-9 |
| regulation of phenotypic switching                                                             | 1.17857e-9  | 4.91688e-9 |
| negative regulation of presynaptic membrane organization                                       | 1.18827e-9  | 4.95421e-9 |
| positive regulation of lipid transport across blood brain barrier                              | 1.18827e-9  | 4.95421e-9 |
| skeletal muscle satellite cell differentiation                                                 | 1.24187e-9  | 5.16783e-9 |
| regulation of acetylcholine secretion, neurotransmission                                       | 1.26946e-9  | 5.27931e-9 |
| negative regulation of smooth muscle cell-matrix adhesion                                      | 1.28559e-9  | 5.34470e-9 |
| regulation of synaptic vesicle priming                                                         | 1.34659e-9  | 5.59299e-9 |
| negative regulation of UDP-glucose catabolic process                                           | 1.36378e-9  | 5.66264e-9 |
| negative regulation of glycogen synthase activity, transferring glucose-1-phosphate            | 1.36378e-9  | 5.66264e-9 |
| Okazaki fragment processing involved in mitotic DNA replication                                | 1.37243e-9  | 5.69313e-9 |
| protein linear polyubiquitination                                                              | 1.41887e-9  | 5.88022e-9 |
| positive regulation of clathrin coat assembly                                                  | 1.44885e-9  | 6.00068e-9 |
| autophagy of host cells involved in interaction with symbiont                                  | 1.44914e-9  | 5.99998e-9 |
| positive regulation of DNA damage checkpoint                                                   | 1.47007e-9  | 6.08091e-9 |
| spontaneous exocytosis of neurotransmitter                                                     | 1.48639e-9  | 6.14648e-9 |
| sphinganine metabolic process                                                                  | 1.51039e-9  | 6.24181e-9 |
| negative regulation of pre-miRNA processing                                                    | 1.59451e-9  | 6.57291e-9 |
| positive regulation of type B pancreatic cell proliferation                                    | 1.60892e-9  | 6.63025e-9 |
| isopeptide cross-linking via N6-(L-isoglutamyl)-L-lysine                                       | 1.62046e-9  | 6.67362e-9 |
| regulation of myeloid dendritic cell activation                                                | 1.62914e-9  | 6.70515e-9 |
| negative regulation of cellular response to hypoxia                                            | 1.69277e-9  | 6.95833e-9 |
| nephrogenic mesenchyme development                                                             | 1.75931e-9  | 7.22962e-9 |
| platelet alpha granule organization                                                            | 1.82907e-9  | 7.50220e-9 |
| positive regulation of Fc-gamma receptor signaling pathway involved in phagocytosis            | 1.93820e-9  | 7.93498e-9 |
| P granule organization                                                                         | 1.98052e-9  | 8.09816e-9 |
| glycolytic process through glucose-1-phosphate                                                 | 2.26207e-9  | 9.21787e-9 |
| cytoplasm-associated proteasomal ubiquitin-dependent protein catabolic process                 | 2.34338e-9  | 9.53737e-9 |
| glutamine transport                                                                            | 2.35763e-9  | 9.59240e-9 |
| viral RNA genome packaging                                                                     | 2.44814e-9  | 9.95451e-9 |
| positive regulation of adenosine receptor signaling pathway                                    | 2.53223e-9  | 1.02901e-8 |
| protein K29-linked ubiquitination                                                              | 2.53264e-9  | 1.02886e-8 |
| NADP biosynthetic process                                                                      | 2.56257e-9  | 1.04069e-8 |
| mammary gland fat development                                                                  | 2.59260e-9  | 1.05224e-8 |
| positive regulation of macrophage colony-stimulating factor signaling pathway                  | 2.59260e-9  | 1.05224e-8 |
| positive regulation of microglial cell migration                                               | 2.59260e-9  | 1.05224e-8 |
| positive regulation of megakaryocyte differentiation                                           | 2.71214e-9  | 1.09974e-8 |
| positive regulation of leukotriene production involved in inflammatory response                | 2.82068e-9  | 1.14304e-8 |
| negative regulation of vascular wound healing                                                  | 2.82068e-9  | 1.14304e-8 |
| meiotic attachment of telomere to nuclear envelope                                             | 3.02624e-9  | 1.22333e-8 |
| anaerobic respiration                                                                          | 3.10160e-9  | 1.25302e-8 |
| response to interleukin-11                                                                     | 3.13838e-9  | 1.26711e-8 |
| positive regulation of transforming growth factor beta2 production                             | 3.23511e-9  | 1.30496e-8 |
| meiotic cell cycle checkpoint                                                                  | 3.30318e-9  | 1.33160e-8 |
| regulation of opsonization                                                                     | 3.33968e-9  | 1.34590e-8 |
| negative regulation of histone H2A K63-linked ubiquitination                                   | 3.36021e-9  | 1.35210e-8 |
| adenosine catabolic process                                                                    | 3.54299e-9  | 1.42261e-8 |
| inosine biosynthetic process                                                                   | 3.54299e-9  | 1.42261e-8 |
| anterograde dendritic transport                                                                | 3.54891e-9  | 1.42411e-8 |



|                                                                                                                 |            |            |
|-----------------------------------------------------------------------------------------------------------------|------------|------------|
| immunoglobulin V(D)J recombination                                                                              | 3.58859e-9 | 1.43959e-8 |
| positive regulation of DNA ligase activity                                                                      | 3.61815e-9 | 1.45101e-8 |
| positive regulation of trophoblast cell migration                                                               | 3.78049e-9 | 1.51473e-8 |
| regulation of low-density lipoprotein particle receptor biosynthetic process                                    | 3.80398e-9 | 1.52322e-8 |
| glucose-6-phosphate transport                                                                                   | 3.82012e-9 | 1.52921e-8 |
| leukocyte adhesive activation                                                                                   | 3.99891e-9 | 1.59835e-8 |
| negative regulation of protein refolding                                                                        | 4.23686e-9 | 1.69243e-8 |
| regulation of protein folding                                                                                   | 4.43762e-9 | 1.77047e-8 |
| folic acid transport                                                                                            | 4.60663e-9 | 1.83567e-8 |
| visceral muscle development                                                                                     | 5.12812e-9 | 2.03977e-8 |
| regulation of actin filament binding                                                                            | 5.35704e-9 | 2.12954e-8 |
| interleukin-4-mediated signaling pathway                                                                        | 5.51019e-9 | 2.18910e-8 |
| negative regulation of Wnt signaling pathway involved in digestive tract morphogenesis                          | 5.73491e-9 | 2.27562e-8 |
| positive regulation of cardioblast proliferation                                                                | 5.75103e-9 | 2.28065e-8 |
| regulation of protein localization to cilium                                                                    | 5.78447e-9 | 2.29253e-8 |
| neuron death in response to oxidative stress                                                                    | 5.89227e-9 | 2.33454e-8 |
| regulation of lateral mesodermal cell fate specification                                                        | 5.92768e-9 | 2.34787e-8 |
| RNA polymerase III type 1 promoter transcriptional preinitiation complex assembly                               | 5.95326e-9 | 2.35729e-8 |
| transcription from RNA polymerase III type 2 promoter                                                           | 5.95326e-9 | 2.35729e-8 |
| cleavage in ITS2 between 5.8S rRNA and LSU-rRNA of tricistronic rRNA transcript (SSU-rRNA, 5.8S rRNA, LSU-rRNA) | 6.13327e-9 | 2.42565e-8 |
| regulation of granulosa cell apoptotic process                                                                  | 6.27612e-9 | 2.48065e-8 |
| positive regulation of MHC class I biosynthetic process                                                         | 6.27971e-9 | 2.48132e-8 |
| mammary duct terminal end bud growth                                                                            | 6.41972e-9 | 2.53437e-8 |
| nucleosome positioning                                                                                          | 6.46165e-9 | 2.55015e-8 |
| positive regulation of transcription involved in exit from mitosis                                              | 6.48463e-9 | 2.55845e-8 |
| inosine metabolic process                                                                                       | 6.58555e-9 | 2.59671e-8 |
| menaquinone biosynthetic process                                                                                | 6.76805e-9 | 2.66707e-8 |
| ubiquinone biosynthetic process via 3,4-dihydroxy-5-polyprenylbenzoate                                          | 6.76805e-9 | 2.66707e-8 |
| vitamin K biosynthetic process                                                                                  | 6.76805e-9 | 2.66707e-8 |
| peptidyl-histidine dephosphorylation                                                                            | 6.81162e-9 | 2.68183e-8 |
| corticosterone secretion                                                                                        | 6.97325e-9 | 2.74301e-8 |
| regulation of autophagosome size                                                                                | 7.13606e-9 | 2.80537e-8 |
| polyamine import                                                                                                | 7.13606e-9 | 2.80537e-8 |
| peptidyl-aspartic acid autophosphorylation                                                                      | 7.13606e-9 | 2.80537e-8 |
| cellular response to sodium arsenite                                                                            | 7.79167e-9 | 3.05762e-8 |
| chlorinated hydrocarbon metabolic process                                                                       | 7.85866e-9 | 3.08300e-8 |
| regulation of the force of skeletal muscle contraction                                                          | 7.98502e-9 | 3.12977e-8 |
| regulation of oocyte maturation                                                                                 | 8.10849e-9 | 3.17721e-8 |
| negative regulation of keratinocyte migration                                                                   | 8.60134e-9 | 3.36532e-8 |
| positive regulation of Schwann cell proliferation                                                               | 8.81300e-9 | 3.44403e-8 |
| atrial septum secundum morphogenesis                                                                            | 9.10584e-9 | 3.55425e-8 |
| positive regulation of cell fate specification                                                                  | 9.26713e-9 | 3.61506e-8 |
| negative regulation of hyaluronan biosynthetic process                                                          | 9.88707e-9 | 3.85347e-8 |
| T-helper 1 cell lineage commitment                                                                              | 1.00346e-8 | 3.90866e-8 |
| glucocorticoid secretion                                                                                        | 1.01395e-8 | 3.94833e-8 |
| negative regulation of transcription from RNA polymerase II promoter by histone modification                    | 1.01908e-8 | 3.96714e-8 |
| response to L-arginine                                                                                          | 1.02201e-8 | 3.97738e-8 |
| regulation of natural killer cell differentiation involved in immune response                                   | 1.03220e-8 | 4.01583e-8 |
| negative regulation of glial cell migration                                                                     | 1.04478e-8 | 4.06357e-8 |
| mitochondrial tRNA pseudouridine synthesis                                                                      | 1.06160e-8 | 4.12780e-8 |
| positive regulation of histone H3-K27 acetylation                                                               | 1.07037e-8 | 4.16066e-8 |
| negative regulation of vascular smooth muscle cell differentiation                                              | 1.08616e-8 | 4.21706e-8 |
| regulation of membrane repolarization during atrial cardiac muscle cell action potential                        | 1.11026e-8 | 4.30933e-8 |
| positive regulation of erythrocyte aggregation                                                                  | 1.11290e-8 | 4.31705e-8 |
| establishment of protein localization to juxtaparanode region of axon                                           | 1.14381e-8 | 4.43564e-8 |
| maintenance of DNA methylation                                                                                  | 1.19914e-8 | 4.64473e-8 |
| cytoplasmic pattern recognition receptor signaling pathway in response to virus                                 | 1.21737e-8 | 4.71394e-8 |
| peptidyl-arginine methylation, to symmetrical-dimethyl arginine                                                 | 1.23070e-8 | 4.76135e-8 |
| otolith formation                                                                                               | 1.23596e-8 | 4.78032e-8 |
| neuromast hair cell development                                                                                 | 1.23596e-8 | 4.78032e-8 |
| acetylcholine secretion                                                                                         | 1.23596e-8 | 4.78032e-8 |
| regulation of peroxisome size                                                                                   | 1.25392e-8 | 4.84409e-8 |
| positive regulation of metalloendopeptidase activity                                                            | 1.32056e-8 | 5.09851e-8 |
| negative regulation of ATP citrate synthase activity                                                            | 1.33092e-8 | 5.13701e-8 |
| interleukin-6 secretion                                                                                         | 1.33596e-8 | 5.15494e-8 |
| negative regulation of macroautophagy by TORC1 signaling                                                        | 1.44716e-8 | 5.57911e-8 |

|                                                                                                   |            |            |
|---------------------------------------------------------------------------------------------------|------------|------------|
| regulation of polyamine transmembrane transport                                                   | 1.49884e-8 | 5.77158e-8 |
| negative regulation of skeletal muscle acetylcholine-gated channel clustering                     | 1.55030e-8 | 5.96800e-8 |
| glutathione transport                                                                             | 1.55984e-8 | 6.00121e-8 |
| DNA strand elongation involved in mitotic DNA replication                                         | 1.60661e-8 | 6.17575e-8 |
| actin filament branching                                                                          | 1.67843e-8 | 6.44427e-8 |
| positive regulation of vascular endothelial cell proliferation                                    | 1.72026e-8 | 6.59718e-8 |
| positive regulation of sensory perception of pain                                                 | 1.77140e-8 | 6.77946e-8 |
| enucleate erythrocyte development                                                                 | 1.78634e-8 | 6.83266e-8 |
| positive regulation of polyamine transmembrane transport                                          | 1.78757e-8 | 6.83539e-8 |
| deoxyadenosine catabolic process                                                                  | 1.89315e-8 | 7.23489e-8 |
| xanthine biosynthetic process                                                                     | 1.89315e-8 | 7.23489e-8 |
| negative regulation of adenosine receptor signaling pathway                                       | 1.89315e-8 | 7.23489e-8 |
| negative regulation of penile erection                                                            | 1.89315e-8 | 7.23489e-8 |
| late endosome to Golgi transport                                                                  | 1.89887e-8 | 7.24833e-8 |
| negative regulation of natural killer cell differentiation involved in immune response            | 1.95966e-8 | 7.47821e-8 |
| growth of symbiont in host                                                                        | 1.95966e-8 | 7.47821e-8 |
| negative regulation of lung blood pressure                                                        | 2.01826e-8 | 7.68622e-8 |
| regulation of Rab protein signal transduction                                                     | 2.05663e-8 | 7.82556e-8 |
| seminal clot liquefaction                                                                         | 2.09350e-8 | 7.96125e-8 |
| positive regulation of platelet-derived growth factor receptor-beta signaling pathway             | 2.09593e-8 | 7.96816e-8 |
| glycerol biosynthetic process                                                                     | 2.21702e-8 | 8.41877e-8 |
| negative regulation of single stranded viral RNA replication via double stranded DNA intermediate | 2.24457e-8 | 8.52096e-8 |
| positive regulation of humoral immune response mediated by circulating immunoglobulin             | 2.24607e-8 | 8.52418e-8 |
| establishment or maintenance of cell polarity regulating cell shape                               | 2.32959e-8 | 8.83349e-8 |
| positive regulation of necrotic cell death                                                        | 2.52635e-8 | 9.55206e-8 |
| negative regulation of membrane invagination                                                      | 2.56153e-8 | 9.68229e-8 |
| octopamine biosynthetic process                                                                   | 2.59692e-8 | 9.80481e-8 |
| negative regulation of cyclic-nucleotide phosphodiesterase activity                               | 2.63258e-8 | 9.93658e-8 |
| N-acetylneuraminic acid catabolic process                                                         | 2.75400e-8 | 1.03829e-7 |
| apoptotic process in bone marrow                                                                  | 2.75685e-8 | 1.03907e-7 |
| positive regulation of interleukin-10 biosynthetic process                                        | 2.79867e-8 | 1.05453e-7 |
| mitochondrial pyrimidine nucleotide import                                                        | 2.80314e-8 | 1.05591e-7 |
| zymogen granule exocytosis                                                                        | 2.95229e-8 | 1.11083e-7 |
| interleukin-10 production                                                                         | 3.03116e-8 | 1.13952e-7 |
| response to silicon dioxide                                                                       | 3.15635e-8 | 1.18523e-7 |
| DNA replication, Okazaki fragment processing                                                      | 3.31367e-8 | 1.24253e-7 |
| response to mycotoxin                                                                             | 3.32566e-8 | 1.24667e-7 |
| regulation of inositol 1,4,5-trisphosphate-sensitive calcium-release channel activity             | 3.46306e-8 | 1.29670e-7 |
| response to sodium arsenite                                                                       | 3.59233e-8 | 1.34358e-7 |
| regulation of membrane hyperpolarization                                                          | 3.60774e-8 | 1.34896e-7 |
| SH2 domain-mediated complex assembly                                                              | 3.69818e-8 | 1.38199e-7 |
| cellular response to endothelin                                                                   | 3.69818e-8 | 1.38199e-7 |
| nuclear-transcribed mRNA catabolic process, exonucleolytic, 3'-5' rRNA 3'-end processing          | 3.76219e-8 | 1.40471e-7 |
| regulation of homocysteine metabolic process                                                      | 3.81791e-8 | 1.42470e-7 |
| regulation of homocysteine metabolic process                                                      | 3.86629e-8 | 1.44194e-7 |
| positive regulation of hypersensitivity                                                           | 3.90800e-8 | 1.45667e-7 |
| negative regulation of transforming growth factor beta activation                                 | 4.11368e-8 | 1.53160e-7 |
| positive regulation of mitotic cell cycle, embryonic                                              | 4.20350e-8 | 1.56415e-7 |
| negative regulation of stomach neuroendocrine cell differentiation                                | 4.20350e-8 | 1.56415e-7 |
| negative regulation of pancreatic A cell differentiation                                          | 4.20350e-8 | 1.56415e-7 |
| glycine secretion, neurotransmission                                                              | 4.23121e-8 | 1.57313e-7 |
| norepinephrine secretion                                                                          | 4.28206e-8 | 1.59113e-7 |
| menaquinone metabolic process                                                                     | 4.28219e-8 | 1.59074e-7 |
| negative regulation of circadian sleep/wake cycle, sleep                                          | 4.31510e-8 | 1.60251e-7 |
| negative regulation of NK T cell activation                                                       | 4.46222e-8 | 1.65621e-7 |
| negative regulation of phagocytosis, engulfment                                                   | 4.46222e-8 | 1.65621e-7 |
| negative regulation of activation of JAK2 kinase activity                                         | 4.46222e-8 | 1.65621e-7 |
| positive regulation of antigen processing and presentation                                        | 4.53472e-8 | 1.68169e-7 |
| response to hydroxyisoflavone                                                                     | 4.73985e-8 | 1.75579e-7 |
| positive regulation of inclusion body assembly                                                    | 4.97448e-8 | 1.83959e-7 |
| antibiotic metabolic process                                                                      | 4.99079e-8 | 1.84511e-7 |
| negative regulation by symbiont of host apoptotic process                                         | 5.40721e-8 | 1.99569e-7 |
| telomere tethering at nuclear periphery                                                           | 5.65559e-8 | 2.08444e-7 |
| regulation of protein monoubiquitination                                                          | 5.67772e-8 | 2.09201e-7 |
| positive regulation of G1 to G0 transition                                                        | 5.71977e-8 | 2.10632e-7 |
| positive regulation of uterine smooth muscle relaxation                                           | 5.99395e-8 | 2.20482e-7 |
| negative regulation of maintenance of permeability of blood-brain barrier                         | 5.99395e-8 | 2.20482e-7 |
| positive regulation of thymocyte migration                                                        | 5.99731e-8 | 2.20483e-7 |

|                                                                                                                       |            |            |
|-----------------------------------------------------------------------------------------------------------------------|------------|------------|
| spermine catabolic process                                                                                            | 6.14999e-8 | 2.25906e-7 |
| tRNA acetylation                                                                                                      | 6.17187e-8 | 2.26647e-7 |
| rRNA acetylation involved in maturation of SSU-rRNA                                                                   | 6.17187e-8 | 2.26647e-7 |
| detection of hypoxic conditions in blood by carotid body chemoreceptor signaling                                      | 6.23647e-8 | 2.28827e-7 |
| dermatan sulfate catabolic process                                                                                    | 6.25384e-8 | 2.29401e-7 |
| protein localization to cell cortex                                                                                   | 6.52369e-8 | 2.39033e-7 |
| resolution of mitotic recombination intermediates                                                                     | 6.55540e-8 | 2.40061e-7 |
| positive regulation of glucose catabolic process to lactate via pyruvate                                              | 6.62168e-8 | 2.42285e-7 |
| macrophage migration inhibitory factor signaling pathway                                                              | 6.63227e-8 | 2.42605e-7 |
| release of cytoplasmic sequestered NF-kappaB                                                                          | 6.80231e-8 | 2.48687e-7 |
| regulation of translational termination                                                                               | 7.28657e-8 | 2.66169e-7 |
| follicular dendritic cell activation                                                                                  | 7.38315e-8 | 2.69622e-7 |
| tRNA transcription                                                                                                    | 7.49787e-8 | 2.73584e-7 |
| negative regulation of dendritic cell cytokine production                                                             | 7.59202e-8 | 2.76865e-7 |
| zygote asymmetric cell division                                                                                       | 7.61839e-8 | 2.77673e-7 |
| plasma membrane long-chain fatty acid transport                                                                       | 7.64733e-8 | 2.78497e-7 |
| medium-chain fatty-acyl-CoA metabolic process                                                                         | 8.07324e-8 | 2.93601e-7 |
| maintenance of transcriptional fidelity during DNA-templated transcription elongation from RNA polymerase II promoter | 8.35244e-8 | 3.03503e-7 |
| dGDP metabolic process                                                                                                | 8.79669e-8 | 3.19293e-7 |
| positive regulation of aggregophagy                                                                                   | 9.02610e-8 | 3.26988e-7 |
| fourth ventricle development                                                                                          | 9.09462e-8 | 3.29380e-7 |
| initiation of neural tube closure                                                                                     | 9.09462e-8 | 3.29380e-7 |
| DNA unwinding involved in DNA replication                                                                             | 9.21723e-8 | 3.33636e-7 |
| viral translational termination-reinitiation                                                                          | 9.90310e-8 | 3.57774e-7 |
| defense response to fungus, incompatible interaction                                                                  | 9.98988e-8 | 3.60810e-7 |
| transforming growth factor beta receptor signaling pathway involved in heart development                              | 9.98988e-8 | 3.60810e-7 |
| embryonic liver development                                                                                           | 9.98988e-8 | 3.60810e-7 |
| mesenchymal cell apoptotic process                                                                                    | 1.02263e-7 | 3.68945e-7 |
| release from viral latency                                                                                            | 1.02473e-7 | 3.69599e-7 |
| regulation of sperm capacitation                                                                                      | 1.05975e-7 | 3.81918e-7 |
| glucose import in response to insulin stimulus                                                                        | 1.06870e-7 | 3.85037e-7 |
| extracellular matrix constituent secretion                                                                            | 1.08298e-7 | 3.89967e-7 |
| positive regulation of endoplasmic reticulum stress-induced eIF2 alpha dephosphorylation                              | 1.08461e-7 | 3.90447e-7 |
| depurination                                                                                                          | 1.09366e-7 | 3.93492e-7 |
| cornified envelope assembly                                                                                           | 1.10545e-7 | 3.97513e-7 |
| rRNA transport                                                                                                        | 1.11690e-7 | 4.01521e-7 |
| positive regulation of microtubule binding                                                                            | 1.12355e-7 | 4.03802e-7 |
| negative regulation of Rac protein signal transduction                                                                | 1.12791e-7 | 4.05258e-7 |
| G0 to G1 transition                                                                                                   | 1.13871e-7 | 4.08916e-7 |
| post-embryonic body morphogenesis                                                                                     | 1.18497e-7 | 4.25294e-7 |
| positive regulation of acetylcholine secretion, neurotransmission                                                     | 1.22518e-7 | 4.39248e-7 |
| negative regulation of nuclear-transcribed mRNA poly(A) tail shortening                                               | 1.26410e-7 | 4.52953e-7 |
| negative regulation of megakaryocyte differentiation                                                                  | 1.31211e-7 | 4.69518e-7 |
| triglyceride acyl-chain remodeling                                                                                    | 1.35350e-7 | 4.83935e-7 |
| regulation of multivesicular body size                                                                                | 1.39084e-7 | 4.96879e-7 |
| L-threonine catabolic process to glycine                                                                              | 1.42049e-7 | 5.07334e-7 |
| thiamine pyrophosphate transport                                                                                      | 1.43548e-7 | 5.12412e-7 |
| positive regulation of telomeric DNA binding                                                                          | 1.57359e-7 | 5.60643e-7 |
| actin filament fragmentation                                                                                          | 1.61066e-7 | 5.73695e-7 |
| negative regulation of formation of translation preinitiation complex                                                 | 1.66883e-7 | 5.93452e-7 |
| positive regulation of histone H3-K9 dimethylation                                                                    | 1.71086e-7 | 6.07249e-7 |
| eukaryotic translation initiation factor 4F complex assembly                                                          | 1.72603e-7 | 6.12468e-7 |
| base-excision repair, DNA ligation                                                                                    | 1.74433e-7 | 6.18627e-7 |
| negative regulation of pinocytosis                                                                                    | 1.77235e-7 | 6.28058e-7 |
| regulation of cAMP catabolic process                                                                                  | 1.77533e-7 | 6.28945e-7 |
| MDA-5 signaling pathway                                                                                               | 1.77977e-7 | 6.30346e-7 |
| negative regulation of cysteine-type endopeptidase activity involved in apoptotic signaling pathway                   | 1.79498e-7 | 6.35391e-7 |
| sperm flagellum movement involved in flagellated sperm motility                                                       | 1.79880e-7 | 6.36574e-7 |
| polyadenylation-dependent snoRNA 3'-end processing                                                                    | 1.81756e-7 | 6.43039e-7 |
| histone H3-R26 citrullination                                                                                         | 1.82376e-7 | 6.45060e-7 |
| wound healing involved in inflammatory response                                                                       | 1.82705e-7 | 6.46047e-7 |
| cellular response to cobalt ion                                                                                       | 1.90971e-7 | 6.74550e-7 |
| cellular response to leptomycin B                                                                                     | 1.94492e-7 | 6.86434e-7 |
| negative regulation of glomerular filtration by angiotensin                                                           | 2.03694e-7 | 7.18335e-7 |
| smooth muscle hypertrophy                                                                                             | 2.03694e-7 | 7.18335e-7 |
| interleukin-8 secretion                                                                                               | 2.04129e-7 | 7.19484e-7 |
| fat-soluble vitamin biosynthetic process                                                                              | 2.04235e-7 | 7.19663e-7 |
| D-xylose catabolic process                                                                                            | 2.05659e-7 | 7.24294e-7 |

|                                                                                                                           |            |            |
|---------------------------------------------------------------------------------------------------------------------------|------------|------------|
| regulation of endocannabinoid signaling pathway                                                                           | 2.06405e-7 | 7.26726e-7 |
| regulation of oxygen metabolic process                                                                                    | 2.06812e-7 | 7.27964e-7 |
| regulation of polynucleotide adenylyltransferase activity                                                                 | 2.10806e-7 | 7.41031e-7 |
| SNARE complex disassembly                                                                                                 | 2.16224e-7 | 7.59470e-7 |
| toxin biosynthetic process                                                                                                | 2.17669e-7 | 7.64137e-7 |
| oxidative deethylation                                                                                                    | 2.17669e-7 | 7.64137e-7 |
| CD40 signaling pathway                                                                                                    | 2.22446e-7 | 7.80282e-7 |
| positive regulation of platelet aggregation                                                                               | 2.24643e-7 | 7.87568e-7 |
| symmetric cell division                                                                                                   | 2.33950e-7 | 8.19322e-7 |
| negative regulation of protein localization to cell cortex                                                                | 2.33950e-7 | 8.19322e-7 |
| B cell costimulation                                                                                                      | 2.45615e-7 | 8.57663e-7 |
| skeletal muscle fiber adaptation                                                                                          | 2.46291e-7 | 8.59797e-7 |
| sebaceous gland cell differentiation                                                                                      | 2.66581e-7 | 9.29642e-7 |
| negative regulation of podosome assembly                                                                                  | 2.67812e-7 | 9.33439e-7 |
| clearance of foreign intracellular DNA by conversion of DNA cytidine to uridine                                           | 2.82914e-7 | 9.83991e-7 |
| positive regulation of RNA polymerase II regulatory region sequence-specific DNA binding                                  | 3.16954e-7 | 1.09861e-6 |
| positive regulation of transcription from RNA polymerase II promoter in response to heat stress                           | 3.18471e-7 | 1.10358e-6 |
| cellular response to nitroglycerin                                                                                        | 3.18471e-7 | 1.10358e-6 |
| GDP-L-fucose salvage                                                                                                      | 3.27540e-7 | 1.13410e-6 |
| negative regulation of receptor localization to synapse                                                                   | 3.31916e-7 | 1.14835e-6 |
| negative regulation of anterograde synaptic vesicle transport                                                             | 3.31916e-7 | 1.14835e-6 |
| transepithelial L-ascorbic acid transport                                                                                 | 3.43139e-7 | 1.18593e-6 |
| nitrate catabolic process                                                                                                 | 3.47714e-7 | 1.20143e-6 |
| nitric oxide catabolic process                                                                                            | 3.47714e-7 | 1.20143e-6 |
| cellular organofluorine metabolic process                                                                                 | 3.47714e-7 | 1.20143e-6 |
| suppression by virus of host type I interferon-mediated signaling pathway                                                 | 3.48930e-7 | 1.20468e-6 |
| suppression by virus of host STAT1 activity                                                                               | 3.48930e-7 | 1.20468e-6 |
| suppression by virus of host STAT2 activity                                                                               | 3.48930e-7 | 1.20468e-6 |
| neurotransmitter receptor transport postsynaptic membrane to endosome                                                     | 3.48930e-7 | 1.20468e-6 |
| enzyme active site formation via cysteine modification to L-cysteine persulfide                                           | 3.51387e-7 | 1.21189e-6 |
| protein urmylation                                                                                                        | 3.51387e-7 | 1.21189e-6 |
| asparagine catabolic process                                                                                              | 3.72950e-7 | 1.28357e-6 |
| detection of temperature stimulus involved in thermoception                                                               | 3.74297e-7 | 1.28753e-6 |
| response to capsazepine                                                                                                   | 3.74297e-7 | 1.28753e-6 |
| thyroid hormone catabolic process                                                                                         | 3.90517e-7 | 1.34087e-6 |
| gamma-aminobutyric acid import                                                                                            | 4.00748e-7 | 1.37492e-6 |
| negative regulation of RNA polymerase II regulatory region sequence-specific DNA binding                                  | 4.02167e-7 | 1.37907e-6 |
| actin rod assembly                                                                                                        | 4.06675e-7 | 1.39380e-6 |
| putrescine transport                                                                                                      | 4.30526e-7 | 1.47439e-6 |
| cerebellum formation                                                                                                      | 4.35782e-7 | 1.49200e-6 |
| midbrain-hindbrain boundary maturation during brain development                                                           | 4.35782e-7 | 1.49200e-6 |
| astrocyte-dopaminergic neuron signaling                                                                                   | 4.35782e-7 | 1.49200e-6 |
| regulation of adiponectin secretion                                                                                       | 4.44570e-7 | 1.51893e-6 |
| anterior compartment pattern formation                                                                                    | 4.70831e-7 | 1.60282e-6 |
| posterior compartment specification                                                                                       | 4.70831e-7 | 1.60282e-6 |
| type I interferon production                                                                                              | 4.76659e-7 | 1.62182e-6 |
| lysosomal membrane organization                                                                                           | 4.84887e-7 | 1.64939e-6 |
| sperm mitochondrion organization                                                                                          | 4.91916e-7 | 1.67244e-6 |
| sulfur oxidation                                                                                                          | 5.16416e-7 | 1.75438e-6 |
| vitamin E biosynthetic process                                                                                            | 5.84222e-7 | 1.98012e-6 |
| xenophagy                                                                                                                 | 6.35649e-7 | 2.15110e-6 |
| protein localization to nucleoplasm                                                                                       | 6.42454e-7 | 2.17301e-6 |
| tricarboxylic acid transmembrane transport                                                                                | 6.62731e-7 | 2.23929e-6 |
| mitotic DNA replication preinitiation complex assembly                                                                    | 6.65163e-7 | 2.24693e-6 |
| negative regulation of actin filament binding                                                                             | 6.65782e-7 | 2.24787e-6 |
| ATF6-mediated unfolded protein response                                                                                   | 7.02593e-7 | 2.36851e-6 |
| enzyme active site formation                                                                                              | 7.09974e-7 | 2.39278e-6 |
| rhomomere 2 development                                                                                                   | 7.17755e-7 | 2.41714e-6 |
| pons maturation                                                                                                           | 7.50651e-7 | 2.52533e-6 |
| synaptic vesicle recycling via endosome                                                                                   | 7.63447e-7 | 2.56707e-6 |
| positive regulation of proteasomal ubiquitin-dependent protein catabolic process involved in cellular response to hypoxia | 7.94939e-7 | 2.67023e-6 |
| U4 snRNA 3'-end processing                                                                                                | 8.01642e-7 | 2.69137e-6 |
| protein secretion by platelet                                                                                             | 8.02783e-7 | 2.69452e-6 |
| lactate oxidation                                                                                                         | 8.03668e-7 | 2.69680e-6 |
| phosphatidylserine biosynthetic process                                                                                   | 8.24013e-7 | 2.76295e-6 |
| viral release from host cell                                                                                              | 8.38800e-7 | 2.81039e-6 |
| regulation of lipoprotein oxidation                                                                                       | 8.56063e-7 | 2.86749e-6 |

|                                                                                                    |            |            |
|----------------------------------------------------------------------------------------------------|------------|------------|
| mRNA cleavage involved in gene silencing by miRNA                                                  | 9.07888e-7 | 3.03645e-6 |
| negative regulation of glycogen catabolic process                                                  | 9.44643e-7 | 3.15617e-6 |
| peptidyl-glutamine methylation                                                                     | 9.59232e-7 | 3.20410e-6 |
| positive regulation of mediator complex assembly                                                   | 9.60288e-7 | 3.20681e-6 |
| skeletal muscle fiber differentiation                                                              | 9.91743e-7 | 3.30682e-6 |
| protein depalmitoylation                                                                           | 1.07353e-6 | 3.57319e-6 |
| cellular response to interleukin-17                                                                | 1.09740e-6 | 3.64985e-6 |
| negative regulation of hydrogen peroxide metabolic process                                         | 1.10204e-6 | 3.66436e-6 |
| histone H3-T3 phosphorylation involved in chromosome passenger complex localization to kinetochore | 1.15229e-6 | 3.82758e-6 |
| negative regulation of vitamin D receptor signaling pathway                                        | 1.17249e-6 | 3.89076e-6 |
| response to host immune response                                                                   | 1.18753e-6 | 3.93769e-6 |
| negative regulation of muscle atrophy                                                              | 1.25298e-6 | 4.15154e-6 |
| positive regulation of plasminogen activation                                                      | 1.29704e-6 | 4.29430e-6 |
| negative regulation of FasL biosynthetic process                                                   | 1.32333e-6 | 4.37803e-6 |
| acetaldehyde metabolic process                                                                     | 1.37915e-6 | 4.55584e-6 |
| trans-Golgi network membrane organization                                                          | 1.39740e-6 | 4.61149e-6 |
| dolichyl diphosphate biosynthetic process                                                          | 1.40539e-6 | 4.63552e-6 |
| mineralocorticoid receptor signaling pathway                                                       | 1.42639e-6 | 4.70363e-6 |
| positive regulation of vitamin D 24-hydroxylase activity                                           | 1.45566e-6 | 4.79533e-6 |
| tRNA N2-guanine methylation                                                                        | 1.46709e-6 | 4.83057e-6 |
| activation of protein kinase C activity                                                            | 1.47476e-6 | 4.85461e-6 |
| positive regulation of dendritic cell antigen processing and presentation                          | 1.47516e-6 | 4.85470e-6 |
| coenzyme A transmembrane transport                                                                 | 1.48899e-6 | 4.89653e-6 |
| AMP transport                                                                                      | 1.48899e-6 | 4.89653e-6 |
| regulation of CD8-positive, alpha-beta T cell differentiation                                      | 1.50723e-6 | 4.95280e-6 |
| glycerol biosynthetic process from pyruvate                                                        | 1.59005e-6 | 5.21715e-6 |
| guanosine-containing compound catabolic process                                                    | 1.61893e-6 | 5.30661e-6 |
| regulation of lipoprotein lipid oxidation                                                          | 1.62232e-6 | 5.31640e-6 |
| L-serine catabolic process                                                                         | 1.62484e-6 | 5.32331e-6 |
| maintenance of unfolded protein involved in ERAD pathway                                           | 1.67516e-6 | 5.48410e-6 |
| regulation of mRNA endonucleolytic cleavage involved in unfolded protein response                  | 1.69307e-6 | 5.53858e-6 |
| peptidyl-cysteine S-trans-nitrosylation                                                            | 1.70139e-6 | 5.56441e-6 |
| positive regulation of circadian sleep/wake cycle, REM sleep                                       | 1.71047e-6 | 5.59271e-6 |
| mitochondrial L-ornithine transmembrane transport                                                  | 1.71906e-6 | 5.61943e-6 |
| antifungal humoral response                                                                        | 1.76256e-6 | 5.75732e-6 |
| cell migration involved in kidney development                                                      | 1.80166e-6 | 5.88213e-6 |
| L-lysine transmembrane transport                                                                   | 1.80368e-6 | 5.88726e-6 |
| peptidyl-glutamine modification                                                                    | 1.89498e-6 | 6.17604e-6 |
| thermosensory behavior                                                                             | 1.90040e-6 | 6.19220e-6 |
| positive regulation of interleukin-1 beta biosynthetic process                                     | 1.90287e-6 | 6.19870e-6 |
| regulation of type Ila hypersensitivity                                                            | 1.93023e-6 | 6.28471e-6 |
| Schwann cell proliferation                                                                         | 1.98012e-6 | 6.44076e-6 |
| tRNA wobble cytosine modification                                                                  | 2.00373e-6 | 6.51595e-6 |
| regulation of cilium beat frequency involved in ciliary motility                                   | 2.00864e-6 | 6.53032e-6 |
| modification of dendritic spine                                                                    | 2.05536e-6 | 6.67725e-6 |
| cellular response to pheromone                                                                     | 2.12900e-6 | 6.91137e-6 |
| regulation of vesicle targeting, to, from or within Golgi                                          | 2.22858e-6 | 7.23106e-6 |
| negative regulation of myeloid dendritic cell activation                                           | 2.29552e-6 | 7.44460e-6 |
| vacuolar phosphate transport                                                                       | 2.40404e-6 | 7.78695e-6 |
| positive regulation of mitotic cell cycle DNA replication                                          | 2.40404e-6 | 7.78695e-6 |
| positive regulation of parathyroid hormone secretion                                               | 2.40404e-6 | 7.78695e-6 |
| cellular response to interleukin-13                                                                | 2.42368e-6 | 7.84284e-6 |
| negative regulation of MyD88-dependent toll-like receptor signaling pathway                        | 2.51810e-6 | 8.13434e-6 |
| negative regulation of defense response to virus by host                                           | 2.56684e-6 | 8.28569e-6 |
| vacuolar protein processing                                                                        | 2.70026e-6 | 8.70568e-6 |
| regulation of eosinophil activation                                                                | 2.78794e-6 | 8.97958e-6 |
| pentose-phosphate shunt, oxidative branch                                                          | 2.78966e-6 | 8.98290e-6 |
| negative regulation of lipoprotein metabolic process                                               | 2.82977e-6 | 9.10537e-6 |
| cell gliding                                                                                       | 2.86034e-6 | 9.20150e-6 |
| response to vitamin B1                                                                             | 2.89658e-6 | 9.31352e-6 |
| myotube differentiation involved in skeletal muscle regeneration                                   | 2.91568e-6 | 9.37263e-6 |
| positive regulation of complement activation                                                       | 2.99922e-6 | 9.63178e-6 |
| ER-dependent peroxisome organization                                                               | 3.03243e-6 | 9.73128e-6 |
| establishment of planar polarity involved in nephron morphogenesis                                 | 3.04339e-6 | 9.76407e-6 |
| carnosine biosynthetic process                                                                     | 3.37488e-6 | 1.07986e-5 |
| cellular heat acclimation                                                                          | 3.44607e-6 | 1.10184e-5 |
| regulation of cardiac cell fate specification                                                      | 3.47441e-6 | 1.11036e-5 |
| mitochondrial electron transport, succinate to ubiquinone                                          | 3.57681e-6 | 1.14170e-5 |
| fructose 1,6-bisphosphate metabolic process                                                        | 3.88169e-6 | 1.23571e-5 |
| nitrate transport                                                                                  | 3.89804e-6 | 1.24062e-5 |
| positive regulation of collecting lymphatic vessel constriction                                    | 3.90682e-6 | 1.24311e-5 |

|                                                                                                        |            |            |
|--------------------------------------------------------------------------------------------------------|------------|------------|
| cellular response to light intensity                                                                   | 3.92998e-6 | 1.24988e-5 |
| oocyte growth                                                                                          | 4.18421e-6 | 1.32816e-5 |
| histone H3-K14 acetylation                                                                             | 4.30785e-6 | 1.36510e-5 |
| positive regulation of cytolysis in other organism                                                     | 4.32794e-6 | 1.37114e-5 |
| cellular response to selenite ion                                                                      | 4.39033e-6 | 1.39057e-5 |
| negative regulation of selenocysteine incorporation                                                    | 4.39033e-6 | 1.39057e-5 |
| negative regulation of selenocysteine insertion sequence binding                                       | 4.39033e-6 | 1.39057e-5 |
| cell migration involved in heart formation                                                             | 4.47659e-6 | 1.41653e-5 |
| protein localization to mitotic spindle                                                                | 4.49484e-6 | 1.42162e-5 |
| asparagine transport                                                                                   | 4.50747e-6 | 1.42493e-5 |
| convergent extension involved in neural plate elongation                                               | 4.55291e-6 | 1.43860e-5 |
| atrioventricular node cell development                                                                 | 4.58159e-6 | 1.44732e-5 |
| histone peptidyl-prolyl isomerization                                                                  | 4.65700e-6 | 1.47043e-5 |
| postsynaptic neurotransmitter receptor diffusion trapping                                              | 4.70433e-6 | 1.48502e-5 |
| Mullerian duct regression                                                                              | 4.96653e-6 | 1.56478e-5 |
| endomitotic cell cycle                                                                                 | 5.03833e-6 | 1.58626e-5 |
| trichloroethylene metabolic process                                                                    | 5.09664e-6 | 1.60424e-5 |
| negative regulation of IRE1-mediated unfolded protein response                                         | 5.11295e-6 | 1.60899e-5 |
| suppression by virus of host apoptotic process                                                         | 5.12755e-6 | 1.61320e-5 |
| photoreceptor cell morphogenesis                                                                       | 5.24651e-6 | 1.64904e-5 |
| barrier septum assembly                                                                                | 5.35849e-6 | 1.68263e-5 |
| quinolinate catabolic process                                                                          | 5.39784e-6 | 1.69459e-5 |
| microtubule-dependent intracellular transport of viral material towards nucleus                        | 5.67053e-6 | 1.77850e-5 |
| lipoxin A4 biosynthetic process                                                                        | 5.69876e-6 | 1.78650e-5 |
| positive regulation of nucleobase-containing compound transport                                        | 5.84994e-6 | 1.83258e-5 |
| cardiac atrium formation                                                                               | 5.93498e-6 | 1.85701e-5 |
| sinus venosus morphogenesis                                                                            | 5.93498e-6 | 1.85701e-5 |
| cardioblast anterior-lateral migration                                                                 | 5.93498e-6 | 1.85701e-5 |
| positive regulation of Notch signaling pathway involved in heart induction                             | 5.93498e-6 | 1.85701e-5 |
| negative regulation of endodermal cell fate specification                                              | 5.93498e-6 | 1.85701e-5 |
| cardioblast migration to the midline involved in heart field formation                                 | 5.93498e-6 | 1.85701e-5 |
| positive regulation of hepatocyte differentiation                                                      | 5.93498e-6 | 1.85701e-5 |
| regulation of exocyst assembly                                                                         | 5.94219e-6 | 1.85618e-5 |
| regulation of exocyst localization                                                                     | 5.94219e-6 | 1.85618e-5 |
| receptor localization to non-motile cilium                                                             | 6.08582e-6 | 1.89879e-5 |
| Purkinje myocyte differentiation                                                                       | 6.11624e-6 | 1.90738e-5 |
| atrioventricular node cell fate commitment                                                             | 6.11624e-6 | 1.90738e-5 |
| positive regulation of chronic inflammatory response to non-antigenic stimulus                         | 6.37859e-6 | 1.98683e-5 |
| negative regulation of ERK5 cascade                                                                    | 6.46199e-6 | 2.01234e-5 |
| regulation of molecular function, epigenetic                                                           | 6.57817e-6 | 2.04706e-5 |
| sperm individualization                                                                                | 6.83204e-6 | 2.12405e-5 |
| regulation of collecting lymphatic vessel constriction                                                 | 7.58325e-6 | 2.35204e-5 |
| urokinase plasminogen activator signaling pathway                                                      | 7.65162e-6 | 2.37213e-5 |
| purine deoxyribonucleoside metabolic process                                                           | 7.86448e-6 | 2.43640e-5 |
| negative regulation of intracellular calcium activated chloride channel activity                       | 8.53028e-6 | 2.63707e-5 |
| regulation of antibacterial peptide production                                                         | 8.54440e-6 | 2.64082e-5 |
| biosynthetic process of antibacterial peptides active against Gram-negative bacteria                   | 8.66839e-6 | 2.67788e-5 |
| neutrophil mediated killing of fungus                                                                  | 8.66839e-6 | 2.67788e-5 |
| rRNA import into mitochondrion                                                                         | 8.92130e-6 | 2.75407e-5 |
| regulation of sodium-dependent phosphate transport                                                     | 9.31199e-6 | 2.87265e-5 |
| negative regulation of toll-like receptor 7 signaling pathway                                          | 9.37138e-6 | 2.89030e-5 |
| interferon-alpha production                                                                            | 9.57827e-6 | 2.95203e-5 |
| positive regulation of chaperone-mediated autophagy                                                    | 9.73636e-6 | 3.00005e-5 |
| histone H3-K9 deacetylation                                                                            | 9.89092e-6 | 3.04625e-5 |
| protein localization to perinuclear region of cytoplasm                                                | 9.89708e-6 | 3.04743e-5 |
| establishment of glial blood-brain barrier                                                             | 1.00842e-5 | 3.10360e-5 |
| positive regulation of fractalkine biosynthetic process                                                | 1.04017e-5 | 3.19758e-5 |
| negative regulation of cellular amino acid metabolic process                                           | 1.06265e-5 | 3.26592e-5 |
| cellular cadmium ion homeostasis                                                                       | 1.09356e-5 | 3.35776e-5 |
| nitrite transport                                                                                      | 1.09356e-5 | 3.35776e-5 |
| interleukin-3 production                                                                               | 1.09356e-5 | 3.35776e-5 |
| MHC class II biosynthetic process                                                                      | 1.09356e-5 | 3.35776e-5 |
| polarity specification of proximal/distal axis                                                         | 1.10795e-5 | 3.39880e-5 |
| axial mesodermal cell fate specification                                                               | 1.10795e-5 | 3.39880e-5 |
| epiblast cell-extraembryonic ectoderm cell signaling involved in anterior/posterior axis specification | 1.10795e-5 | 3.39880e-5 |
| transforming growth factor beta receptor signaling pathway involved in primitive streak formation      | 1.10795e-5 | 3.39880e-5 |
| negative regulation of ovarian follicle development                                                    | 1.12331e-5 | 3.44190e-5 |
| fever generation                                                                                       | 1.14333e-5 | 3.50079e-5 |

|                                                                                                                                        |            |            |
|----------------------------------------------------------------------------------------------------------------------------------------|------------|------------|
| negative regulation of syncytium formation by plasma membrane fusion                                                                   | 1.18067e-5 | 3.61342e-5 |
| regulation of DNA ligase activity                                                                                                      | 1.18272e-5 | 3.61886e-5 |
| hypoxanthine salvage                                                                                                                   | 1.22317e-5 | 3.74177e-5 |
| cell-cell adhesion involved in gastrulation                                                                                            | 1.22583e-5 | 3.74815e-5 |
| positive regulation of protein K63-linked deubiquitination                                                                             | 1.23093e-5 | 3.76201e-5 |
| regulation of cytolysis in other organism                                                                                              | 1.27085e-5 | 3.88041e-5 |
| regulation of arginine metabolic process                                                                                               | 1.27832e-5 | 3.90230e-5 |
| regulation of cysteine-type endopeptidase activity involved in execution phase of apoptosis                                            | 1.30910e-5 | 3.99442e-5 |
| peptidyl-lysine modification to peptidyl-hypusine                                                                                      | 1.30997e-5 | 3.99615e-5 |
| regulation of CD8-positive, alpha-beta T cell activation                                                                               | 1.31657e-5 | 4.01347e-5 |
| peroxisomal membrane transport                                                                                                         | 1.32436e-5 | 4.03442e-5 |
| vitamin A biosynthetic process                                                                                                         | 1.33521e-5 | 4.06558e-5 |
| beta-carotene metabolic process                                                                                                        | 1.33521e-5 | 4.06558e-5 |
| positive regulation of miRNA mediated inhibition of translation                                                                        | 1.35661e-5 | 4.12692e-5 |
| coumarin metabolic process                                                                                                             | 1.39674e-5 | 4.24214e-5 |
| response to sulfur dioxide                                                                                                             | 1.40755e-5 | 4.27300e-5 |
| cell wall mannoprotein biosynthetic process                                                                                            | 1.41389e-5 | 4.29127e-5 |
| mannose to fructose-6-phosphate metabolic process                                                                                      | 1.41389e-5 | 4.29127e-5 |
| regulation of actin cytoskeleton organization by cell-cell adhesion                                                                    | 1.44923e-5 | 4.39343e-5 |
| regulation of thyroid-stimulating hormone secretion                                                                                    | 1.45481e-5 | 4.40934e-5 |
| positive regulation of chronic inflammatory response                                                                                   | 1.48999e-5 | 4.50973e-5 |
| mitochondrial ribosome assembly                                                                                                        | 1.49132e-5 | 4.51273e-5 |
| regulation of transcription from RNA polymerase II promoter in response to iron                                                        | 1.50179e-5 | 4.54336e-5 |
| response to intra-S DNA damage checkpoint signaling                                                                                    | 1.52255e-5 | 4.60405e-5 |
| cytosine metabolic process                                                                                                             | 1.58570e-5 | 4.78731e-5 |
| telomeric heterochromatin assembly                                                                                                     | 1.59381e-5 | 4.81068e-5 |
| negative regulation of chromosome condensation                                                                                         | 1.59381e-5 | 4.81068e-5 |
| diadenosine tetraphosphate biosynthetic process                                                                                        | 1.59568e-5 | 4.81412e-5 |
| commitment of multipotent stem cells to neuronal lineage in forebrain                                                                  | 1.72030e-5 | 5.18416e-5 |
| protein targeting to vacuole involved in ubiquitin-dependent protein catabolic process via the multivesicular body sorting pathway     | 1.82524e-5 | 5.48658e-5 |
| meiotic DNA integrity checkpoint                                                                                                       | 1.84601e-5 | 5.54772e-5 |
| uncoating of virus                                                                                                                     | 1.86899e-5 | 5.61167e-5 |
| negative regulation of mRNA polyadenylation                                                                                            | 1.88500e-5 | 5.65585e-5 |
| chaperone cofactor-dependent protein refolding                                                                                         | 1.90514e-5 | 5.71109e-5 |
| alanyl-tRNA aminoacylation                                                                                                             | 1.92786e-5 | 5.77655e-5 |
| spermidine catabolic process                                                                                                           | 2.04783e-5 | 6.12347e-5 |
| metanephric proximal convoluted tubule development                                                                                     | 2.05397e-5 | 6.14045e-5 |
| adenine salvage                                                                                                                        | 2.05586e-5 | 6.14469e-5 |
| peptide antigen stabilization                                                                                                          | 2.10028e-5 | 6.27460e-5 |
| positive regulation of transcription from RNA polymerase II promoter in response to arsenic-containing substance                       | 2.12743e-5 | 6.35140e-5 |
| histone H3-K4 acetylation                                                                                                              | 2.16495e-5 | 6.46193e-5 |
| regulation of myeloid progenitor cell differentiation                                                                                  | 2.18396e-5 | 6.51719e-5 |
| nicotinate nucleotide salvage                                                                                                          | 2.37408e-5 | 7.06050e-5 |
| positive regulation of DNA damage response, signal transduction by p53 class mediator resulting in transcription of p21 class mediator | 2.42470e-5 | 7.20781e-5 |
| positive regulation of IP-10 production                                                                                                | 2.46564e-5 | 7.32785e-5 |
| prostaglandin catabolic process                                                                                                        | 2.64667e-5 | 7.85522e-5 |
| positive regulation of DNA catabolic process                                                                                           | 2.75397e-5 | 8.15710e-5 |
| cerebrospinal fluid secretion                                                                                                          | 3.00782e-5 | 8.89098e-5 |
| enterobactin transport                                                                                                                 | 3.14640e-5 | 9.29019e-5 |
| establishment of natural killer cell polarity                                                                                          | 3.29842e-5 | 9.73030e-5 |
| negative regulation of Fas signaling pathway                                                                                           | 3.30846e-5 | 9.75774e-5 |
| positive regulation of osteoclast proliferation                                                                                        | 3.35613e-5 | 9.89612e-5 |
| peptidyl-lysine oxidation                                                                                                              | 3.38975e-5 | 9.98630e-5 |
| fibronectin fibril organization                                                                                                        | 3.38975e-5 | 9.98630e-5 |
| response to interleukin-13                                                                                                             | 3.60069e-5 | 1.05887e-4 |
| cap-dependent translational initiation                                                                                                 | 3.62949e-5 | 1.06687e-4 |
| regulation of cellular amino acid biosynthetic process                                                                                 | 3.65708e-5 | 1.07474e-4 |
| skeletal muscle satellite cell migration                                                                                               | 3.70200e-5 | 1.08745e-4 |
| viral protein processing                                                                                                               | 3.77825e-5 | 1.10861e-4 |
| dibasic protein processing                                                                                                             | 3.77825e-5 | 1.10861e-4 |
| cellular response to diamide                                                                                                           | 3.81169e-5 | 1.11768e-4 |
| rhombomere 4 development                                                                                                               | 3.87155e-5 | 1.13396e-4 |
| response to iron ion starvation                                                                                                        | 4.01985e-5 | 1.17583e-4 |
| positive regulation of mRNA 3'-UTR binding                                                                                             | 4.12493e-5 | 1.20549e-4 |
| cell communication by chemical coupling                                                                                                | 4.39756e-5 | 1.28232e-4 |
| quorum sensing involved in interaction with host                                                                                       | 4.49342e-5 | 1.30998e-4 |
| positive regulation of intestinal epithelial structure maintenance                                                                     | 4.49342e-5 | 1.30998e-4 |
| sodium-dependent organic cation transport                                                                                              | 4.49342e-5 | 1.30998e-4 |
| negative regulation of complement-dependent cytotoxicity                                                                               | 4.52310e-5 | 1.31747e-4 |

|                                                                                                      |            |            |
|------------------------------------------------------------------------------------------------------|------------|------------|
| neurofibrillary tangle assembly                                                                      | 4.54011e-5 | 1.32184e-4 |
| positive regulation of diacylglycerol kinase activity                                                | 4.54011e-5 | 1.32184e-4 |
| commissural neuron differentiation in spinal cord                                                    | 4.57040e-5 | 1.33007e-4 |
| antibacterial peptide production                                                                     | 4.57274e-5 | 1.33045e-4 |
| positive regulation of histone H2B ubiquitination                                                    | 4.66665e-5 | 1.35718e-4 |
| carotene metabolic process                                                                           | 4.78191e-5 | 1.38947e-4 |
| negative regulation of memory T cell differentiation                                                 | 4.88906e-5 | 1.42029e-4 |
| cellular response to zinc ion starvation                                                             | 4.99824e-5 | 1.45104e-4 |
| negative regulation of sodium:proton antiporter activity                                             | 4.99920e-5 | 1.45100e-4 |
| DNA dephosphorylation                                                                                | 5.03208e-5 | 1.46023e-4 |
| modulation by symbiont of host I-kappaB kinase/NF-kappaB cascade                                     | 5.20205e-5 | 1.50722e-4 |
| positive regulation of hydrogen peroxide biosynthetic process                                        | 5.20888e-5 | 1.50887e-4 |
| mitochondrial citrate transport                                                                      | 5.25134e-5 | 1.52083e-4 |
| mitotic cytokinesis checkpoint                                                                       | 5.34153e-5 | 1.54627e-4 |
| corneocyte development                                                                               | 5.64921e-5 | 1.63175e-4 |
| amylopectin biosynthetic process                                                                     | 5.69906e-5 | 1.64542e-4 |
| complement component C5a signaling pathway                                                           | 5.76798e-5 | 1.66386e-4 |
| intrinsic apoptotic signaling pathway in response to hypoxia                                         | 5.77458e-5 | 1.66540e-4 |
| positive regulation of cellular amino acid metabolic process                                         | 6.06264e-5 | 1.74656e-4 |
| negative regulation of lipoprotein lipase activity                                                   | 6.43720e-5 | 1.85203e-4 |
| acetylcholine transport                                                                              | 6.51643e-5 | 1.87442e-4 |
| dGTP catabolic process                                                                               | 6.52942e-5 | 1.87774e-4 |
| interleukin-1 alpha secretion                                                                        | 6.53997e-5 | 1.88037e-4 |
| allantoin catabolic process                                                                          | 6.58126e-5 | 1.89141e-4 |
| lysosomal lumen pH elevation                                                                         | 6.62444e-5 | 1.90340e-4 |
| negative regulation of mitotic centrosome separation                                                 | 6.62777e-5 | 1.90395e-4 |
| negative regulation of cysteine-type endopeptidase activity involved in execution phase of apoptosis | 6.68837e-5 | 1.92094e-4 |
| negative regulation of protein folding                                                               | 6.75590e-5 | 1.93948e-4 |
| histone biotinylation                                                                                | 6.76738e-5 | 1.94193e-4 |
| prenylated protein catabolic process                                                                 | 6.96585e-5 | 1.99583e-4 |
| negative regulation of endocytic recycling                                                           | 7.26040e-5 | 2.07706e-4 |
| L-arginine transport                                                                                 | 7.35947e-5 | 2.10495e-4 |
| positive regulation of deadenylation-independent decapping of nuclear-transcribed mRNA               | 7.58583e-5 | 2.16875e-4 |
| negative regulation of polynucleotide adenylyltransferase activity                                   | 7.58583e-5 | 2.16875e-4 |
| mRNA cleavage involved in gene silencing by siRNA                                                    | 7.75934e-5 | 2.21594e-4 |
| DNA replication preinitiation complex assembly                                                       | 7.87037e-5 | 2.24619e-4 |
| G1 to G0 transition involved in cell differentiation                                                 | 8.09051e-5 | 2.30852e-4 |
| positive regulation of cell proliferation in midbrain                                                | 8.34390e-5 | 2.37618e-4 |
| cellular response to glial cell derived neurotrophic factor                                          | 8.34390e-5 | 2.37618e-4 |
| basement membrane disassembly                                                                        | 8.56714e-5 | 2.43764e-4 |
| deoxycytidine metabolic process                                                                      | 8.96533e-5 | 2.54598e-4 |
| cellular response to L-glutamine                                                                     | 9.27434e-5 | 2.63203e-4 |
| cellular response to dithiothreitol                                                                  | 9.28766e-5 | 2.63524e-4 |
| nitric oxide homeostasis                                                                             | 9.37575e-5 | 2.65966e-4 |
| intracellular transport of viral protein in host cell                                                | 9.62316e-5 | 2.72749e-4 |
| regulation of t-circle formation                                                                     | 9.63698e-5 | 2.73082e-4 |
| mature conventional dendritic cell differentiation                                                   | 1.03443e-4 | 2.92685e-4 |
| protein palmitoylation                                                                               | 1.09582e-4 | 3.09323e-4 |
| regulation of translation by machinery localization                                                  | 1.09746e-4 | 3.09718e-4 |
| negative regulation of mRNA endonucleolytic cleavage involved in unfolded protein response           | 1.10341e-4 | 3.11332e-4 |
| interleukin-23-mediated signaling pathway                                                            | 1.11043e-4 | 3.13110e-4 |
| regulation of glucosylceramidase activity                                                            | 1.15361e-4 | 3.24867e-4 |
| regulation of glucose catabolic process to lactate via pyruvate                                      | 1.15608e-4 | 3.25494e-4 |
| positive regulation of calcium-independent cell-cell adhesion                                        | 1.29985e-4 | 3.64800e-4 |
| transcription initiation from mitochondrial promoter                                                 | 1.30207e-4 | 3.65347e-4 |
| tolerance induction to self antigen                                                                  | 1.32299e-4 | 3.70899e-4 |
| regulation of chronic inflammatory response to non-antigenic stimulus                                | 1.34860e-4 | 3.77758e-4 |
| farnesyl diphosphate metabolic process                                                               | 1.35725e-4 | 3.80019e-4 |
| regulation of vascular permeability involved in acute inflammatory response                          | 1.36089e-4 | 3.80876e-4 |
| negative regulation of neutrophil apoptotic process                                                  | 1.39238e-4 | 3.89522e-4 |
| protein K33-linked deubiquitination                                                                  | 1.40477e-4 | 3.92904e-4 |
| positive regulation of attachment of spindle microtubules to kinetochore                             | 1.41644e-4 | 3.95833e-4 |
| negative regulation of cellular organofluorine metabolic process                                     | 1.49317e-4 | 4.16568e-4 |
| negative regulation of collagen catabolic process                                                    | 1.54854e-4 | 4.31557e-4 |
| negative regulation of elastin catabolic process                                                     | 1.54854e-4 | 4.31557e-4 |
| bile acid signaling pathway                                                                          | 1.56861e-4 | 4.36780e-4 |
| negative regulation of the force of heart contraction                                                | 1.57122e-4 | 4.37416e-4 |
| negative regulation of arginine catabolic process                                                    | 1.57122e-4 | 4.37416e-4 |
| negative regulation of citrulline biosynthetic process                                               | 1.57122e-4 | 4.37416e-4 |



|                                                                                                      |            |            |
|------------------------------------------------------------------------------------------------------|------------|------------|
| negative regulation of connective tissue replacement involved in inflammatory response wound healing | 1.57228e-4 | 4.37338e-4 |
| negative regulation of advanced glycation end-product receptor activity                              | 1.57228e-4 | 4.37338e-4 |
| negative regulation of erythrocyte apoptotic process                                                 | 1.58535e-4 | 4.40510e-4 |
| cellular response to tetrahydrofolate                                                                | 1.62275e-4 | 4.50711e-4 |
| positive regulation of low-density lipoprotein particle receptor catabolic process                   | 1.62475e-4 | 4.51170e-4 |
| protein localization to microvillus                                                                  | 1.66100e-4 | 4.60847e-4 |
| nitrobenzene metabolic process                                                                       | 1.75429e-4 | 4.86322e-4 |
| acetate biosynthetic process                                                                         | 1.76667e-4 | 4.89650e-4 |
| acetyl-CoA biosynthetic process from acetate                                                         | 1.76667e-4 | 4.89650e-4 |
| propionate biosynthetic process                                                                      | 1.76667e-4 | 4.89650e-4 |
| leukocyte migration involved in immune response                                                      | 1.81648e-4 | 5.03031e-4 |
| positive regulation of AMPA glutamate receptor clustering                                            | 1.82099e-4 | 5.04175e-4 |
| negative regulation of centriole elongation                                                          | 1.89871e-4 | 5.25028e-4 |
| positive regulation of cardiolipin metabolic process                                                 | 1.91542e-4 | 5.29428e-4 |
| positive regulation of T cell anergy                                                                 | 1.93422e-4 | 5.34511e-4 |
| carbon dioxide transmembrane transport                                                               | 2.05687e-4 | 5.67451e-4 |
| positive regulation of respiratory burst involved in inflammatory response                           | 2.07207e-4 | 5.71285e-4 |
| CD4-positive, CD25-positive, alpha-beta regulatory T cell differentiation                            | 2.07837e-4 | 5.72903e-4 |
| cellular response to L-ascorbic acid                                                                 | 2.15458e-4 | 5.93288e-4 |
| positive regulation of fat cell apoptotic process                                                    | 2.15458e-4 | 5.93288e-4 |
| negative regulation of glutamine transport                                                           | 2.15458e-4 | 5.93288e-4 |
| mitochondrial alanyl-tRNA aminoacylation                                                             | 2.18386e-4 | 6.00846e-4 |
| positive regulation of immunoglobulin biosynthetic process                                           | 2.29927e-4 | 6.31411e-4 |
| regulation of DNA replication origin binding                                                         | 2.30107e-4 | 6.31774e-4 |
| Spemann organizer formation at the anterior end of the primitive streak                              | 2.31776e-4 | 6.36223e-4 |
| canonical Wnt signaling pathway involved in stem cell proliferation                                  | 2.31776e-4 | 6.36223e-4 |
| negative regulation of protein K48-linked deubiquitination                                           | 2.33121e-4 | 6.39381e-4 |
| negative regulation of ubiquitin-specific protease activity                                          | 2.33121e-4 | 6.39381e-4 |
| positive regulation of homophilic cell adhesion                                                      | 2.37097e-4 | 6.49609e-4 |
| positive regulation of sequestering of zinc ion                                                      | 2.40561e-4 | 6.58688e-4 |
| positive regulation of polynucleotide adenylyltransferase activity                                   | 2.43922e-4 | 6.67753e-4 |
| carbon tetrachloride metabolic process                                                               | 2.44577e-4 | 6.69267e-4 |
| benzene metabolic process                                                                            | 2.44577e-4 | 6.69267e-4 |
| ITP metabolic process                                                                                | 2.51336e-4 | 6.86906e-4 |
| Golgi vesicle pre-fusion complex stabilization                                                       | 2.70538e-4 | 7.37086e-4 |
| chronic inflammatory response to antigenic stimulus                                                  | 2.82097e-4 | 7.67151e-4 |
| regulation of presynaptic membrane organization                                                      | 3.01565e-4 | 8.17725e-4 |
| positive regulation of natural killer cell degranulation                                             | 3.12932e-4 | 8.47674e-4 |
| evasion or tolerance by virus of host immune response                                                | 3.21335e-4 | 8.70256e-4 |
| positive regulation of eosinophil degranulation                                                      | 3.38448e-4 | 9.15096e-4 |
| negative regulation of DNA methylation                                                               | 3.40574e-4 | 9.20655e-4 |
| positive regulation of DNA methylation                                                               | 3.40574e-4 | 9.20655e-4 |
| suppression by virus of host molecular function                                                      | 3.43291e-4 | 9.27237e-4 |
| protein localization to cell leading edge                                                            | 3.48119e-4 | 9.39507e-4 |
| pore formation in membrane of other organism                                                         | 3.58056e-4 | 9.65335e-4 |
| alpha-tubulin acetylation                                                                            | 3.59562e-4 | 9.68601e-4 |
| positive regulation of base-excision repair                                                          | 3.65886e-4 | 9.85234e-4 |
| negative regulation of intracellular transport of viral material                                     | 3.79288e-4 | 1.02007e-3 |
| proteasome regulatory particle assembly                                                              | 3.82773e-4 | 1.02881e-3 |
| immunoglobulin transcytosis in epithelial cells mediated by polymeric immunoglobulin receptor        | 3.91777e-4 | 1.05280e-3 |
| interleukin-21-mediated signaling pathway                                                            | 3.99667e-4 | 1.07356e-3 |
| neural plate mediolateral regionalization                                                            | 4.10603e-4 | 1.10203e-3 |
| paraxial mesoderm structural organization                                                            | 4.10603e-4 | 1.10203e-3 |
| positive regulation of cardiac ventricle development                                                 | 4.10603e-4 | 1.10203e-3 |
| fibrous ring of heart morphogenesis                                                                  | 4.10603e-4 | 1.10203e-3 |
| basophil activation                                                                                  | 4.18466e-4 | 1.12177e-3 |
| N-terminal peptidyl-glycine N-myristoylation                                                         | 4.21133e-4 | 1.12868e-3 |
| positive regulation of mitochondrial electron transport, NADH to ubiquinone                          | 4.33038e-4 | 1.15965e-3 |
| negative regulation of hydrogen peroxide-induced neuron intrinsic apoptotic signaling pathway        | 4.33038e-4 | 1.15965e-3 |
| positive regulation of acrosomal vesicle exocytosis                                                  | 4.35388e-4 | 1.16547e-3 |
| gastric inhibitory peptide signaling pathway                                                         | 4.58463e-4 | 1.22598e-3 |
| cadmium ion homeostasis                                                                              | 4.59672e-4 | 1.22897e-3 |
| lysosomal lumen acidification                                                                        | 4.61925e-4 | 1.23449e-3 |
| formation of cytoplasmic translation initiation complex                                              | 4.78812e-4 | 1.27884e-3 |
| hemangioblast cell differentiation                                                                   | 4.87154e-4 | 1.30007e-3 |
| nucleus accumbens development                                                                        | 5.03359e-4 | 1.34277e-3 |

|                                                                                            |            |            |
|--------------------------------------------------------------------------------------------|------------|------------|
| ergosterol biosynthetic process                                                            | 5.08093e-4 | 1.35485e-3 |
| box C/D snoRNA 3'-end processing                                                           | 5.43268e-4 | 1.44454e-3 |
| histone glutamine methylation                                                              | 5.43268e-4 | 1.44454e-3 |
| DNA protection                                                                             | 5.45685e-4 | 1.45038e-3 |
| negative regulation of inorganic anion transmembrane transport                             | 5.67605e-4 | 1.50621e-3 |
| coumarin catabolic process                                                                 | 5.93680e-4 | 1.57445e-3 |
| positive regulation of photoreceptor cell differentiation                                  | 6.00830e-4 | 1.59213e-3 |
| peripheral T cell tolerance induction                                                      | 6.04692e-4 | 1.60172e-3 |
| central tolerance induction to self antigen                                                | 6.04692e-4 | 1.60172e-3 |
| positive regulation of NAD+ ADP-ribosyltransferase activity                                | 6.44963e-4 | 1.70495e-3 |
| agmatine biosynthetic process                                                              | 6.48844e-4 | 1.71487e-3 |
| positive regulation of large conductance calcium-activated potassium channel activity      | 6.67118e-4 | 1.76140e-3 |
| positive regulation of atrial cardiac muscle cell action potential                         | 6.79246e-4 | 1.79198e-3 |
| negative regulation of establishment of blood-brain barrier                                | 6.84576e-4 | 1.80532e-3 |
| intestinal folate absorption                                                               | 6.91738e-4 | 1.82165e-3 |
| negative regulation of branching involved in lung morphogenesis                            | 7.16901e-4 | 1.88602e-3 |
| positive regulation of leukocyte adhesion to arterial endothelial cell                     | 7.16901e-4 | 1.88602e-3 |
| absorption of visible light                                                                | 7.36984e-4 | 1.93537e-3 |
| glucoside transport                                                                        | 7.38822e-4 | 1.93981e-3 |
| methylglyoxal catabolic process to D-lactate via S-lactoyl-glutathione                     | 7.57982e-4 | 1.98774e-3 |
| negative regulation of lipoprotein oxidation                                               | 7.74599e-4 | 2.02889e-3 |
| fructoselysine metabolic process                                                           | 7.98245e-4 | 2.08833e-3 |
| axon extension involved in regeneration                                                    | 8.24959e-4 | 2.15650e-3 |
| metanephric glomerular basement membrane development                                       | 8.24959e-4 | 2.15650e-3 |
| positive regulation of chronic inflammatory response to antigenic stimulus                 | 8.26391e-4 | 2.15938e-3 |
| maltose metabolic process                                                                  | 8.32707e-4 | 2.17546e-3 |
| regulation of DNA-dependent DNA replication initiation                                     | 8.97651e-4 | 2.33816e-3 |
| negative regulation of RNA polymerase II transcriptional preinitiation complex assembly    | 1.04062e-3 | 2.69773e-3 |
| sequestering of neurotransmitter                                                           | 1.04065e-3 | 2.69728e-3 |
| nucleotide-excision repair, DNA damage removal                                             | 1.04758e-3 | 2.71418e-3 |
| DNA 3' dephosphorylation involved in DNA repair                                            | 1.04758e-3 | 2.71418e-3 |
| polynucleotide 3' dephosphorylation                                                        | 1.04758e-3 | 2.71418e-3 |
| borate transmembrane transport                                                             | 1.07242e-3 | 2.77415e-3 |
| ethylene metabolic process                                                                 | 1.08755e-3 | 2.81219e-3 |
| dibenzo-p-dioxin catabolic process                                                         | 1.08755e-3 | 2.81219e-3 |
| regulation of centriole elongation                                                         | 1.09970e-3 | 2.84249e-3 |
| renal protein absorption                                                                   | 1.10155e-3 | 2.84672e-3 |
| regulation of plasma membrane raft polarization                                            | 1.10155e-3 | 2.84672e-3 |
| negative regulation of protein glutathionylation                                           | 1.10352e-3 | 2.85069e-3 |
| positive regulation of endoribonuclease activity                                           | 1.12302e-3 | 2.89880e-3 |
| positive regulation of mRNA endonucleolytic cleavage involved in unfolded protein response | 1.12302e-3 | 2.89880e-3 |
| CD4-positive, CD25-positive, alpha-beta regulatory T cell lineage commitment               | 1.12886e-3 | 2.91271e-3 |
| positive regulation of peripheral T cell tolerance induction                               | 1.12886e-3 | 2.91271e-3 |
| Golgi to secretory granule transport                                                       | 1.16560e-3 | 3.00222e-3 |
| intrinsic apoptotic signaling pathway in response to nitrosative stress                    | 1.17449e-3 | 3.02452e-3 |
| negative regulation of maintenance of mitotic sister chromatid cohesion, centromeric       | 1.17739e-3 | 3.03140e-3 |
| negative regulation of the force of heart contraction by chemical signal                   | 1.18750e-3 | 3.05683e-3 |
| Golgi to plasma membrane CFTR protein transport                                            | 1.21336e-3 | 3.11974e-3 |
| N-acetylglucosamine catabolic process                                                      | 1.21554e-3 | 3.12472e-3 |
| protein localization to kinetochore involved in kinetochore assembly                       | 1.24552e-3 | 3.19930e-3 |
| positive regulation of cristae formation                                                   | 1.28705e-3 | 3.30338e-3 |
| positive regulation of free ubiquitin chain polymerization                                 | 1.28705e-3 | 3.30338e-3 |
| negative regulation of iron ion transmembrane transport                                    | 1.29896e-3 | 3.33134e-3 |
| basophil differentiation                                                                   | 1.35154e-3 | 3.45879e-3 |
| histamine-induced gastric acid secretion                                                   | 1.37605e-3 | 3.51877e-3 |
| gastrin-induced gastric acid secretion                                                     | 1.37605e-3 | 3.51877e-3 |
| transitional one stage B cell differentiation                                              | 1.38197e-3 | 3.53254e-3 |
| positive regulation of actin filament binding                                              | 1.38197e-3 | 3.53254e-3 |
| sphinganine-1-phosphate biosynthetic process                                               | 1.43532e-3 | 3.66322e-3 |
| cellular response to chromate                                                              | 1.43532e-3 | 3.66322e-3 |
| positive regulation of intrinsic apoptotic signaling pathway in response to osmotic stress | 1.43532e-3 | 3.66322e-3 |
| BMP signaling pathway involved in mesodermal cell fate specification                       | 1.45415e-3 | 3.70840e-3 |
| prolyl-tRNA aminoacylation                                                                 | 1.48433e-3 | 3.77804e-3 |
| negative regulation of lipoprotein lipid oxidation                                         | 1.48723e-3 | 3.78467e-3 |
| pre-replicative complex assembly involved in nuclear cell cycle DNA replication            | 1.51275e-3 | 3.84591e-3 |
| negative regulation of eosinophil activation                                               | 1.52699e-3 | 3.87760e-3 |

|                                                                                                                                        |            |            |
|----------------------------------------------------------------------------------------------------------------------------------------|------------|------------|
| positive regulation of glomerular metanephric mesangial cell proliferation                                                             | 1.53088e-3 | 3.88674e-3 |
| prevention of polyspermy                                                                                                               | 1.57793e-3 | 4.00155e-3 |
| positive regulation of oocyte maturation                                                                                               | 1.58006e-3 | 4.00619e-3 |
| positive regulation of voltage-gated potassium channel activity involved in atrial cardiac muscle cell action potential repolarization | 1.61071e-3 | 4.07997e-3 |
| positive regulation of interleukin-1 biosynthetic process                                                                              | 1.61283e-3 | 4.08454e-3 |
| regulation of signal transduction by receptor internalization                                                                          | 1.61408e-3 | 4.08693e-3 |
| regulation of nerve growth factor receptor activity                                                                                    | 1.61408e-3 | 4.08693e-3 |
| negative regulation of sarcomere organization                                                                                          | 1.61408e-3 | 4.08693e-3 |
| negative regulation of membrane depolarization during cardiac muscle cell action potential                                             | 1.61408e-3 | 4.08693e-3 |
| trimming of terminal mannose on B branch                                                                                               | 1.79440e-3 | 4.52263e-3 |
| trimming of first mannose on A branch                                                                                                  | 1.79440e-3 | 4.52263e-3 |
| trimming of second mannose on A branch                                                                                                 | 1.79440e-3 | 4.52263e-3 |
| negative regulation of skeletal muscle hypertrophy                                                                                     | 1.81675e-3 | 4.57543e-3 |
| regulation of chronic inflammatory response to antigenic stimulus                                                                      | 1.86475e-3 | 4.69003e-3 |
| glycolipid translocation                                                                                                               | 1.87913e-3 | 4.72351e-3 |
| nucleotide-sugar catabolic process                                                                                                     | 1.89385e-3 | 4.75958e-3 |
| regulation of skeletal muscle hypertrophy                                                                                              | 2.03391e-3 | 5.10087e-3 |
| negative regulation of high voltage-gated calcium channel activity                                                                     | 2.12647e-3 | 5.32285e-3 |
| positive regulation of pancreatic juice secretion                                                                                      | 2.12799e-3 | 5.32564e-3 |
| D-serine biosynthetic process                                                                                                          | 2.19932e-3 | 5.49788e-3 |
| termination of RNA polymerase III transcription                                                                                        | 2.22221e-3 | 5.55088e-3 |
| negative regulation of double-strand break repair via single-strand annealing                                                          | 2.28323e-3 | 5.69791e-3 |
| rRNA export from nucleus                                                                                                               | 2.31252e-3 | 5.76880e-3 |
| connective tissue growth factor biosynthetic process                                                                                   | 2.34687e-3 | 5.85339e-3 |
| negative regulation of white fat cell proliferation                                                                                    | 2.34687e-3 | 5.85339e-3 |
| central tolerance induction                                                                                                            | 2.36405e-3 | 5.89399e-3 |
| regulation of phenotypic switching by transcription from RNA polymerase II promoter                                                    | 2.39213e-3 | 5.96175e-3 |
| positive regulation of hydrogen sulfide biosynthetic process                                                                           | 2.39213e-3 | 5.96175e-3 |
| negative regulation of zinc ion transmembrane import                                                                                   | 2.45550e-3 | 6.10695e-3 |
| detoxification of cadmium ion                                                                                                          | 2.45550e-3 | 6.10695e-3 |
| positive regulation of hindgut contraction                                                                                             | 2.45723e-3 | 6.10895e-3 |
| IgG immunoglobulin transcytosis in epithelial cells mediated by FcRn immunoglobulin receptor                                           | 2.45765e-3 | 6.10884e-3 |
| dCTP catabolic process                                                                                                                 | 2.49174e-3 | 6.19240e-3 |
| negative regulation of root hair elongation                                                                                            | 2.53017e-3 | 6.28314e-3 |
| positive regulation of renal water transport                                                                                           | 2.63873e-3 | 6.54655e-3 |
| asparagine catabolic process via L-aspartate                                                                                           | 2.65599e-3 | 6.58815e-3 |
| regulation of transcription from RNA polymerase II promoter in response to arsenic-containing substance                                | 2.89730e-3 | 7.15702e-3 |
| BMP signaling pathway involved in spinal cord dorsal/ventral patterning                                                                | 3.17124e-3 | 7.80147e-3 |
| positive regulation of very-low-density lipoprotein particle remodeling                                                                | 3.23864e-3 | 7.95834e-3 |
| positive regulation of methylation-dependent chromatin silencing                                                                       | 3.26137e-3 | 8.00674e-3 |
| interleukin-12 secretion                                                                                                               | 3.27259e-3 | 8.03128e-3 |
| regulation of glutamate uptake involved in transmission of nerve impulse                                                               | 3.29308e-3 | 8.07703e-3 |
| positive regulation of prostaglandin secretion involved in immune response                                                             | 3.29368e-3 | 8.07700e-3 |
| L-lysine catabolic process to acetyl-CoA via L-pipecolate                                                                              | 3.33381e-3 | 8.17390e-3 |
| base-excision repair, base-free sugar-phosphate removal                                                                                | 3.51502e-3 | 8.60374e-3 |
| negative regulation of CD4 biosynthetic process                                                                                        | 3.55894e-3 | 8.70640e-3 |
| mitochondrial depolarization                                                                                                           | 3.69001e-3 | 9.00693e-3 |
| maintenance of mitochondrion location                                                                                                  | 3.70362e-3 | 9.03847e-3 |
| immune response in mucosal-associated lymphoid tissue                                                                                  | 3.75958e-3 | 9.16655e-3 |
| negative regulation of chondrocyte development                                                                                         | 3.87984e-3 | 9.44575e-3 |
| trans-Golgi network to recycling endosome transport                                                                                    | 4.02525e-3 | 9.78166e-3 |
| positive regulation of antigen processing and presentation of peptide antigen via MHC class II                                         | 4.04408e-3 | 9.82379e-3 |
| actomyosin contractile ring contraction                                                                                                | 4.35108e-3 | 1.05326e-2 |
| positive regulation of mitochondrial DNA replication                                                                                   | 4.50757e-3 | 1.08974e-2 |
| stress-induced mitochondrial fusion                                                                                                    | 4.50757e-3 | 1.08974e-2 |
| thiocyanate metabolic process                                                                                                          | 4.59959e-3 | 1.11096e-2 |
| positive regulation of type IV hypersensitivity                                                                                        | 4.66080e-3 | 1.12430e-2 |
| positive regulation of antral ovarian follicle growth                                                                                  | 4.66080e-3 | 1.12430e-2 |
| GDP-fucose import into Golgi lumen                                                                                                     | 4.74880e-3 | 1.14469e-2 |
| histone H3-T11 phosphorylation                                                                                                         | 4.78276e-3 | 1.15182e-2 |
| small-subunit processome assembly                                                                                                      | 4.84447e-3 | 1.16604e-2 |
| regulation of mRNA stability involved in response to stress                                                                            | 4.89180e-3 | 1.17700e-2 |
| pallium cell proliferation in forebrain                                                                                                | 4.89180e-3 | 1.17700e-2 |
| CAAX-box protein processing                                                                                                            | 5.06881e-3 | 1.21826e-2 |

|                                                                                                              |            |            |
|--------------------------------------------------------------------------------------------------------------|------------|------------|
| dGDP biosynthetic process                                                                                    | 5.45408e-3 | 1.30775e-2 |
| dGMP metabolic process                                                                                       | 5.45408e-3 | 1.30775e-2 |
| GDP biosynthetic process                                                                                     | 5.45408e-3 | 1.30775e-2 |
| tubulin deacetylation                                                                                        | 5.65966e-3 | 1.35457e-2 |
| sphingoid catabolic process                                                                                  | 5.89012e-3 | 1.40768e-2 |
| Rab protein signal transduction                                                                              | 6.10881e-3 | 1.45835e-2 |
| chemokine (C-C motif) ligand 19 signaling pathway                                                            | 6.14245e-3 | 1.46532e-2 |
| chemokine (C-C motif) ligand 21 signaling pathway                                                            | 6.14245e-3 | 1.46532e-2 |
| lymphocyte migration into lymph node                                                                         | 6.14245e-3 | 1.46532e-2 |
| positive regulation of immunological synapse formation                                                       | 6.14245e-3 | 1.46532e-2 |
| positive regulation of glycoprotein biosynthetic process involved in immunological synapse formation         | 6.14245e-3 | 1.46532e-2 |
| biphenyl catabolic process                                                                                   | 6.16919e-3 | 1.47037e-2 |
| dolichyl monophosphate biosynthetic process                                                                  | 6.20806e-3 | 1.47883e-2 |
| negative regulation of androgen receptor activity                                                            | 6.32901e-3 | 1.50573e-2 |
| response to methamphetamine hydrochloride                                                                    | 6.36312e-3 | 1.51357e-2 |
| negative regulation of plasmacytoid dendritic cell cytokine production                                       | 6.37846e-3 | 1.51667e-2 |
| negative regulation of apolipoprotein binding                                                                | 6.58285e-3 | 1.56245e-2 |
| positive regulation of cilium movement                                                                       | 7.05868e-3 | 1.67056e-2 |
| facial nucleus development                                                                                   | 7.15115e-3 | 1.69123e-2 |
| epidermal growth factor catabolic process                                                                    | 7.25324e-3 | 1.71353e-2 |
| lipophagy                                                                                                    | 7.25324e-3 | 1.71353e-2 |
| detection of peptidoglycan                                                                                   | 7.25588e-3 | 1.71353e-2 |
| actin filament debranching                                                                                   | 7.34557e-3 | 1.73409e-2 |
| protein N-linked glycosylation via arginine                                                                  | 7.41197e-3 | 1.74851e-2 |
| S-adenosylhomocysteine catabolic process                                                                     | 7.42364e-3 | 1.75095e-2 |
| homocysteine biosynthetic process                                                                            | 7.42364e-3 | 1.75095e-2 |
| translocation of peptides or proteins into host cell cytoplasm                                               | 7.87288e-3 | 1.85094e-2 |
| regulation of dendritic cell dendrite assembly                                                               | 7.91373e-3 | 1.85988e-2 |
| negative regulation of elastin biosynthetic process                                                          | 7.94959e-3 | 1.86797e-2 |
| deoxynucleotide transport                                                                                    | 8.08976e-3 | 1.89853e-2 |
| cell surface bile acid receptor signaling pathway                                                            | 8.09168e-3 | 1.89864e-2 |
| cellular response to caloric restriction                                                                     | 8.21338e-3 | 1.92445e-2 |
| negative regulation of oligodendrocyte progenitor proliferation                                              | 8.21338e-3 | 1.92445e-2 |
| regulation of systemic arterial blood pressure by ischemic conditions                                        | 8.31915e-3 | 1.94820e-2 |
| homeostasis of number of retina cells                                                                        | 8.44858e-3 | 1.97745e-2 |
| negative regulation of hypoxia-inducible factor-1alpha signaling pathway                                     | 8.44858e-3 | 1.97745e-2 |
| regulation of excitatory postsynaptic membrane potential involved in skeletal muscle contraction             | 8.48120e-3 | 1.98367e-2 |
| positive regulation of male germ cell proliferation                                                          | 8.69401e-3 | 2.03200e-2 |
| positive regulation of intrinsic apoptotic signaling pathway in response to DNA damage by p53 class mediator | 8.99300e-3 | 2.10039e-2 |
| regulation of translation involved in cellular response to UV                                                | 8.99300e-3 | 2.10039e-2 |
| regulation of ATP:ADP antiporter activity                                                                    | 8.99333e-3 | 2.09972e-2 |
| negative regulation of tolerance induction                                                                   | 9.02334e-3 | 2.10635e-2 |
| negative regulation of thymidylate synthase biosynthetic process                                             | 9.21085e-3 | 2.14746e-2 |
| detection of oxidative stress                                                                                | 9.57065e-3 | 2.22700e-2 |
| positive regulation of metanephric glomerular visceral epithelial cell development                           | 9.57065e-3 | 2.22700e-2 |
| positive regulation of renal albumin absorption                                                              | 9.57065e-3 | 2.22700e-2 |
| negative regulation of metanephric mesenchymal cell migration                                                | 9.57065e-3 | 2.22700e-2 |
| negative regulation of high-density lipoprotein particle clearance                                           | 9.91916e-3 | 2.30402e-2 |
| methionyl-tRNA aminoacylation                                                                                | 1.00231e-2 | 2.32571e-2 |
| regulation of endoplasmic reticulum stress-induced eIF2 alpha phosphorylation                                | 1.02167e-2 | 2.36685e-2 |
| nerve maturation                                                                                             | 1.03347e-2 | 2.39293e-2 |
| UDP-N-acetylglucosamine catabolic process                                                                    | 1.03438e-2 | 2.39421e-2 |
| UDP-galactose transmembrane transport                                                                        | 1.04284e-2 | 2.41250e-2 |
| bilirubin conjugation                                                                                        | 1.07599e-2 | 2.48483e-2 |
| response to nematode                                                                                         | 1.13430e-2 | 2.61489e-2 |
| protein-FAD linkage                                                                                          | 1.14802e-2 | 2.64467e-2 |
| arginine deiminase pathway                                                                                   | 1.14897e-2 | 2.64638e-2 |
| DNA replication, removal of RNA primer                                                                       | 1.17397e-2 | 2.70018e-2 |
| negative regulation of calcium-dependent cell-cell adhesion                                                  | 1.21093e-2 | 2.78131e-2 |
| nuclear-transcribed mRNA catabolic process, 3'-5' exonucleolytic nonsense-mediated decay                     | 1.30615e-2 | 2.99323e-2 |
| regulation of cholesterol import                                                                             | 1.30694e-2 | 2.99451e-2 |
| positive regulation of histone H4-K20 methylation                                                            | 1.32839e-2 | 3.03996e-2 |
| positive regulation of growth rate                                                                           | 1.45562e-2 | 3.31438e-2 |
| cortisol secretion                                                                                           | 1.45562e-2 | 3.31438e-2 |
| positive regulation of gastric mucosal blood circulation                                                     | 1.45562e-2 | 3.31438e-2 |
| T cell homeostatic proliferation                                                                             | 1.46549e-2 | 3.33339e-2 |
| release of matrix enzymes from mitochondria                                                                  | 1.46549e-2 | 3.33339e-2 |
| B cell receptor apoptotic signaling pathway                                                                  | 1.46549e-2 | 3.33339e-2 |

|                                                                                      |            |            |
|--------------------------------------------------------------------------------------|------------|------------|
| immunoglobulin heavy chain V-D-J recombination                                       | 1.47354e-2 | 3.34940e-2 |
| peroxisome membrane biogenesis                                                       | 1.47931e-2 | 3.36192e-2 |
| negative regulation of glutamate metabolic process                                   | 1.48045e-2 | 3.36393e-2 |
| regulation of eIF2 alpha phosphorylation by dsRNA                                    | 1.51000e-2 | 3.42930e-2 |
| molybdate ion transport                                                              | 1.54714e-2 | 3.50880e-2 |
| synapse assembly involved in innervation                                             | 1.59120e-2 | 3.60501e-2 |
| xylulose catabolic process                                                           | 1.59226e-2 | 3.60678e-2 |
| negative regulation of collagen binding                                              | 1.62242e-2 | 3.67131e-2 |
| anti-Mullerian hormone signaling pathway                                             | 1.64755e-2 | 3.72176e-2 |
| renal glucose absorption                                                             | 1.66202e-2 | 3.75316e-2 |
| detection of lipoteichoic acid                                                       | 1.73367e-2 | 3.90758e-2 |
| positive regulation of C-C chemokine receptor CCR7 signaling pathway                 | 1.73367e-2 | 3.90758e-2 |
| positive regulation of CD40 signaling pathway                                        | 1.73367e-2 | 3.90758e-2 |
| peptide antigen transport                                                            | 1.81818e-2 | 4.08897e-2 |
| protein localization to cytosolic proteasome complex involved in ERAD pathway        | 1.82138e-2 | 4.09476e-2 |
| regulation of iron ion transmembrane transport                                       | 1.86790e-2 | 4.19290e-2 |
| regulation of secretion of lysosomal enzymes                                         | 1.89877e-2 | 4.25783e-2 |
| long-day photoperiodism                                                              | 1.90964e-2 | 4.28001e-2 |
| mitotic spindle microtubule depolymerization                                         | 1.91938e-2 | 4.30038e-2 |
| ventral midline determination                                                        | 1.95881e-2 | 4.38276e-2 |
| detection of cell density by contact stimulus involved in contact inhibition         | 1.95881e-2 | 4.38276e-2 |
| mesenchymal to epithelial transition involved in metanephric renal vesicle formation | 1.95881e-2 | 4.38276e-2 |
| positive regulation of glucagon secretion                                            | 1.97621e-2 | 4.41718e-2 |
| lipid transport across blood brain barrier                                           | 2.01012e-2 | 4.48839e-2 |
| ovarian follicle atresia                                                             | 2.02783e-2 | 4.52716e-2 |
| UDP-glucose catabolic process                                                        | 2.02783e-2 | 4.52716e-2 |
| interleukin-5 production                                                             | 2.02783e-2 | 4.52716e-2 |
| positive regulation of telomeric loop disassembly                                    | 2.02783e-2 | 4.52716e-2 |
| negative regulation of growth of symbiont on or near host surface                    | 2.05660e-2 | 4.58596e-2 |
| intracellular defense response                                                       | 2.09043e-2 | 4.65586e-2 |
| negative regulation of gastrin-induced gastric acid secretion                        | 2.12232e-2 | 4.72369e-2 |
| RNA polymerase II complex import to nucleus                                          | 2.20986e-2 | 4.90691e-2 |
| RNA polymerase III complex localization to nucleus                                   | 2.20986e-2 | 4.90691e-2 |

**Supplementary table 19. Expression changes of *RAP1A* and *RAP1B* in Ad-KLF4 versus Ad-EGFP transduced TC28a2 cells in DRUG-seq analysis.**

| Gene         | Log2(FC)  | <i>P</i> value | FDR      |
|--------------|-----------|----------------|----------|
| <i>RAP1A</i> | -1.42E-01 | 2.93E-01       | 4.09E-01 |
| <i>RAP1B</i> | 1.24E-01  | 3.50E-01       | 4.69E-01 |

*FC* fold change, *FDR* false discovery rate

**Supplementary table 20. List of TaqMan probes.**

| Species | Gene                           | Probe         |
|---------|--------------------------------|---------------|
| Human   | <i>ACAN</i>                    | Hs00153936_m1 |
| Human   | <i>ADAMTS5</i>                 | Hs01095518_m1 |
| Human   | <i>COL1A1</i>                  | Hs00164004_m1 |
| Human   | <i>COL2A1</i>                  | Hs00264051_m1 |
| Human   | <i>COL10A1</i>                 | Hs00166657_m1 |
| Human   | <i>COL11A2</i>                 | Hs00365416_m1 |
| Human   | <i>COMP</i>                    | Hs01561079_m1 |
| Human   | <i>GAPDH</i>                   | Hs02786624_g1 |
| Human   | <i>KLF2</i>                    | Hs00360439_g1 |
| Human   | <i>KLF4</i>                    | Hs00358836_m1 |
| Human   | <i>KLF4</i> (in mouse samples) | Hs00358837_g1 |
| Human   | <i>KLF9</i>                    | Hs00230918_m1 |
| Human   | <i>KLF10</i>                   | Hs00921811_m1 |
| Human   | <i>KLF15</i>                   | Hs00362736_m1 |
| Human   | <i>IL6</i>                     | Hs00174131_m1 |
| Human   | <i>MMP3</i>                    | Hs00968305_m1 |
| Human   | <i>MMP13</i>                   | Hs00233992_m1 |
| Human   | <i>NOS2</i>                    | Hs01075529_m1 |
| Human   | <i>PRG4</i>                    | Hs00981633_m1 |
| Human   | <i>PTGS2</i>                   | Hs00153133_m1 |
| Human   | <i>SCX</i>                     | Hs03054634_g1 |
| Human   | <i>SOX5</i>                    | Hs00374709_m1 |
| Human   | <i>SOX6</i>                    | Hs00264525_m1 |
| Human   | <i>SOX9</i>                    | Hs00165814_m1 |
| Human   | <i>TNXB</i>                    | Hs00372889_g1 |
| Mouse   | <i>Gapdh</i>                   | Mm99999915_g1 |
| Mouse   | <i>Klf2</i> (Exon 1–2)         | Mm00500486_g1 |
| Mouse   | <i>Klf2</i> (Exon 2–3)         | Mm01244979_g1 |
| -       | <i>Cre</i>                     | Mr00635245_cn |

**Supplementary table 21. Antibodies used for IHC.**

| Antibody           | Clone           | Manufacturer (Cat. No.)             | Dilution |
|--------------------|-----------------|-------------------------------------|----------|
| Rabbit anti-KLF4   | EPR3550(2)(ABC) | Abcam (#ab151733)                   | 1:200    |
| Rabbit anti-KLF2   | Polyclonal      | Bioss (#bs-2772R)                   | 1:100    |
| Rabbit anti-HA tag | C29F4           | Cell Signaling Technology (#3724)   | 1:50     |
| Rabbit anti-GFP    | Polyclonal      | Thermo Fisher Scientific (#A-31852) | 1:100    |
